# Supplementary material for: A Scalable Human Brain Cell Atlas Foundation Model Dissects the Cellular Immune Codes and Cognitive Resilience
Source: Research Square preprint supplement (doi:10.21203/rs.3.rs-6986171/v1), 2025-07-08
Supplement: Supplementary file 1 [file Supplemental_Table_S3.xlsx]

## Sheet: DAM vs HM
AD group				Normal group				PART group				Resilience group
ENSEMBL ID	log2FC	FDR		ENSEMBL ID	log2FC	FDR		ENSEMBL ID	log2FC	FDR		ENSEMBL ID	log2FC	FDR
ENSG00000000938	0.105745	1.37482e-08		ENSG00000002549	-0.215466	0.000175635		ENSG00000004399	0.180363	0.000224485		ENSG00000001084	0.119578	0.0354211
ENSG00000001084	0.171122	1.83305e-19		ENSG00000004399	0.134096	0.00222647		ENSG00000007237	0.331015	6.88005e-06		ENSG00000007237	0.312324	0.00129434
ENSG00000002549	-0.138306	2.81304e-05		ENSG00000006747	0.274103	0.0143465		ENSG00000008256	0.137858	0.0470095		ENSG00000009413	0.19939	0.0308613
ENSG00000003402	0.174451	1.14482e-07		ENSG00000007237	0.396273	1.33498e-07		ENSG00000009413	0.164288	0.0171687		ENSG00000009950	-0.244882	0.00581908
ENSG00000004399	0.185542	2.15022e-14		ENSG00000008256	0.171392	0.00759097		ENSG00000009950	-0.160505	0.0186745		ENSG00000011566	0.215959	0.0141354
ENSG00000004864	0.196573	1.56065e-09		ENSG00000008952	-0.125426	0.0184197		ENSG00000011566	0.205849	0.00118392		ENSG00000015676	-0.132485	0.0427707
ENSG00000006704	0.133533	5.55906e-10		ENSG00000009950	-0.140126	0.0253351		ENSG00000012779	-0.202841	0.0395329		ENSG00000019485	-0.171753	0.0318479
ENSG00000006715	0.111189	0.000368087		ENSG00000010017	-0.16112	0.0256418		ENSG00000014641	-0.105577	0.0354237		ENSG00000020577	0.526588	1.85592e-08
ENSG00000006747	0.195498	0.000620595		ENSG00000011566	0.190205	0.00628858		ENSG00000019991	0.101516	0.00434396		ENSG00000027075	0.234414	0.0477549
ENSG00000007237	0.433906	8.6248e-34		ENSG00000012779	-0.187317	0.0418727		ENSG00000020129	-0.12305	0.0238442		ENSG00000030419	-0.241937	0.00221904
ENSG00000008083	0.217617	4.61768e-11		ENSG00000019485	-0.17159	0.00523758		ENSG00000020577	0.590305	4.64592e-16		ENSG00000034053	-0.114383	0.0297034
ENSG00000008256	0.191941	3.08814e-11		ENSG00000019991	0.126947	0.000683025		ENSG00000029725	0.158175	0.0253697		ENSG00000038382	0.218697	0.0267756
ENSG00000008294	0.119765	3.19515e-05		ENSG00000020577	0.575232	3.65092e-19		ENSG00000030419	-0.211671	0.00291757		ENSG00000038945	0.496812	0.00156758
ENSG00000008513	0.150441	4.6618e-07		ENSG00000023516	-0.107402	0.0359037		ENSG00000038945	0.465442	8.43061e-08		ENSG00000044574	-0.23716	0.0134973
ENSG00000009413	0.131687	6.92799e-05		ENSG00000023892	-0.112702	0.0161133		ENSG00000044574	-0.199059	0.0206027		ENSG00000048052	0.507711	5.19472e-07
ENSG00000009950	-0.135293	7.4233e-07		ENSG00000029725	0.136371	0.0418727		ENSG00000048052	0.422307	0.000400483		ENSG00000052795	0.215841	0.0412392
ENSG00000010818	-0.124238	6.83211e-05		ENSG00000030419	-0.218654	2.68847e-05		ENSG00000052126	0.147231	0.0273254		ENSG00000053524	-0.222996	0.000429719
ENSG00000011201	0.109285	0.009583		ENSG00000030582	0.114026	0.0487494		ENSG00000052795	0.259079	0.00305289		ENSG00000055163	-0.13286	0.0137375
ENSG00000011422	0.138234	6.41731e-09		ENSG00000034053	-0.151178	3.71979e-05		ENSG00000053524	-0.18308	0.00440925		ENSG00000058091	0.241072	0.000342503
ENSG00000011566	0.22643	5.84166e-13		ENSG00000038945	0.51688	3.15111e-08		ENSG00000055130	-0.208527	0.00746214		ENSG00000059378	0.131518	0.0228959
ENSG00000012779	-0.129442	0.00258467		ENSG00000039319	0.126488	0.0227349		ENSG00000058091	0.19761	2.90315e-05		ENSG00000059804	-0.385571	0.000342503
ENSG00000018280	0.228048	0.000298069		ENSG00000048052	0.441933	2.64176e-07		ENSG00000059804	-0.374655	4.78979e-05		ENSG00000064652	0.229352	0.00124986
ENSG00000019485	-0.168822	2.70129e-10		ENSG00000048471	0.196565	0.0330427		ENSG00000064652	0.161724	0.0105837		ENSG00000065911	-0.116279	0.0493546
ENSG00000019991	0.134407	5.75644e-14		ENSG00000050438	-0.107728	0.0291994		ENSG00000065911	-0.164614	4.78979e-05		ENSG00000066294	0.233859	0.00354177
ENSG00000020577	0.591984	9.12428e-55		ENSG00000052795	0.35265	1.77793e-06		ENSG00000066294	0.156826	0.0161444		ENSG00000067082	0.189561	0.0402192
ENSG00000021645	-0.134536	0.00212812		ENSG00000055130	-0.27326	7.31629e-07		ENSG00000067715	-0.278676	0.00880565		ENSG00000067798	-0.604527	3.76829e-05
ENSG00000023171	0.181671	1.09523e-07		ENSG00000058091	0.243303	8.53913e-07		ENSG00000067798	-0.477641	5.14256e-06		ENSG00000073417	0.2128	0.0466406
ENSG00000027075	0.212825	3.49891e-08		ENSG00000059758	0.159866	0.00582668		ENSG00000067900	0.156642	0.0470095		ENSG00000074964	0.185902	0.0490645
ENSG00000029725	0.143108	6.87207e-06		ENSG00000059804	-0.29433	0.00303223		ENSG00000075391	0.248983	0.00440925		ENSG00000075618	-0.162867	0.0141354
ENSG00000030419	-0.200533	1.02035e-09		ENSG00000064652	0.261511	3.17601e-05		ENSG00000075618	-0.18835	1.15474e-05		ENSG00000077238	-0.31382	0.0039148
ENSG00000030582	0.123675	6.1449e-07		ENSG00000065911	-0.116353	0.00569182		ENSG00000075624	-0.197578	0.0125709		ENSG00000080371	0.132233	0.0277649
ENSG00000033627	0.131161	4.27503e-06		ENSG00000066294	0.234833	1.11081e-05		ENSG00000077238	-0.199267	0.0298879		ENSG00000080824	-0.356601	0.0318479
ENSG00000033800	0.101751	0.0164124		ENSG00000067798	-0.568479	7.77013e-08		ENSG00000079156	-0.156996	0.00693331		ENSG00000081803	-0.214966	0.00170225
ENSG00000034677	0.116743	5.83608e-07		ENSG00000069849	0.130823	0.025538		ENSG00000079215	0.334494	0.000513865		ENSG00000082996	0.296227	0.000113245
ENSG00000035862	0.142163	4.72795e-08		ENSG00000070882	0.231168	0.00407105		ENSG00000079277	-0.286524	0.000278934		ENSG00000084731	-0.134009	0.0201557
ENSG00000038382	0.207481	5.40045e-08		ENSG00000074416	0.154331	0.00960273		ENSG00000080824	-0.39761	0.00100152		ENSG00000089351	-0.285722	0.0202456
ENSG00000038945	0.650104	1.22932e-40		ENSG00000074706	-0.303008	0.00704552		ENSG00000081803	-0.161307	0.0235031		ENSG00000091831	0.293316	2.77766e-06
ENSG00000039319	0.140955	1.25683e-07		ENSG00000074964	0.132654	0.0253101		ENSG00000082996	0.244075	0.00468555		ENSG00000095585	-0.296243	0.0167462
ENSG00000042980	-0.153649	0.00151652		ENSG00000075391	0.211647	0.026002		ENSG00000087460	-0.184365	0.027055		ENSG00000095951	0.162277	0.0439448
ENSG00000044574	-0.12037	0.000458601		ENSG00000075618	-0.18881	9.4623e-05		ENSG00000088766	-0.109061	0.0192309		ENSG00000096384	-0.233252	0.0427707
ENSG00000047648	0.138747	0.00384854		ENSG00000076356	-0.108584	0.000304175		ENSG00000089693	-0.103745	0.00277698		ENSG00000100311	0.18019	0.0244716
ENSG00000048052	0.486751	5.0557e-23		ENSG00000077238	-0.212655	0.0045842		ENSG00000089916	0.145143	0.0427889		ENSG00000100997	0.176162	0.0427707
ENSG00000048471	0.179419	3.38253e-05		ENSG00000078699	0.137294	0.0226594		ENSG00000091831	0.264959	2.08749e-06		ENSG00000101493	0.235627	4.93433e-05
ENSG00000048740	0.190519	3.13489e-05		ENSG00000079156	-0.143019	0.0128557		ENSG00000092964	-0.191353	0.00387641		ENSG00000101745	0.190395	0.0344499
ENSG00000051108	0.101215	0.00537874		ENSG00000079215	0.320993	0.000942469		ENSG00000096384	-0.229869	0.00304431		ENSG00000102531	0.245467	0.0131394
ENSG00000052795	0.338796	8.68143e-16		ENSG00000079263	-0.157499	0.00280486		ENSG00000099308	-0.138321	0.00184767		ENSG00000102780	0.191228	0.000875444
ENSG00000053524	-0.126878	6.40553e-07		ENSG00000079277	-0.240281	0.000653865		ENSG00000100100	0.120279	0.0275555		ENSG00000103489	0.386854	7.15615e-06
ENSG00000055130	-0.120842	0.000811094		ENSG00000080824	-0.283166	0.0304689		ENSG00000100138	-0.10389	0.00440925		ENSG00000104093	0.254156	0.000127284
ENSG00000055332	0.148729	8.99765e-08		ENSG00000082996	0.244494	0.000368613		ENSG00000100219	-0.15758	2.56442e-05		ENSG00000104324	0.213797	0.0426239
ENSG00000055609	0.102791	0.0156249		ENSG00000084731	-0.119354	0.0013946		ENSG00000100311	0.153737	0.0448658		ENSG00000104763	0.3266	0.000130018
ENSG00000057252	0.188675	8.90188e-10		ENSG00000086730	-0.173642	0.0137514		ENSG00000100505	-0.131766	0.000125504		ENSG00000105339	-0.386222	0.0140917
ENSG00000058091	0.323468	4.65836e-35		ENSG00000089041	0.160157	0.0197803		ENSG00000100600	0.157244	0.0188277		ENSG00000105639	-0.319707	0.00191094
ENSG00000059378	0.124083	1.11983e-10		ENSG00000089094	0.138483	0.0359037		ENSG00000100979	-0.118896	0.0108982		ENSG00000105697	-0.435676	2.96023e-07
ENSG00000059758	0.115976	3.17971e-05		ENSG00000089351	-0.205426	0.000259615		ENSG00000101079	-0.104985	0.0172491		ENSG00000106565	-0.212369	0.00261079
ENSG00000059804	-0.314361	2.62245e-13		ENSG00000091428	-0.103995	0.00362868		ENSG00000101310	-0.107248	0.00216014		ENSG00000107798	0.319341	6.53545e-08
ENSG00000064225	0.146523	2.55279e-05		ENSG00000091831	0.234231	2.99479e-06		ENSG00000101474	-0.18063	0.00193231		ENSG00000107957	0.15464	0.00495176
ENSG00000064652	0.242324	8.20382e-17		ENSG00000092199	-0.137614	0.0459767		ENSG00000101849	0.144712	0.0182294		ENSG00000107968	-0.235686	0.0391057
ENSG00000064999	-0.10898	0.0377955		ENSG00000095585	-0.218121	0.0418727		ENSG00000102158	-0.119444	0.00400899		ENSG00000109323	0.231084	0.00261079
ENSG00000065809	0.108482	6.83165e-07		ENSG00000095951	0.142833	0.00121451		ENSG00000102172	0.14292	0.00176335		ENSG00000111110	0.110991	0.0265374
ENSG00000066294	0.23435	7.67931e-18		ENSG00000095970	0.134403	0.0342809		ENSG00000102780	0.117466	0.0170636		ENSG00000111716	-0.160314	0.0277649
ENSG00000066933	0.144915	2.06321e-07		ENSG00000099250	0.230264	0.00102541		ENSG00000103064	-0.15056	0.041084		ENSG00000111885	0.244512	0.0177316
ENSG00000067208	0.103293	0.00476322		ENSG00000099308	-0.124972	0.00321901		ENSG00000103257	-0.142062	0.0209088		ENSG00000112149	0.312484	0.000419413
ENSG00000067715	-0.179001	0.00138619		ENSG00000099331	0.233948	0.000933771		ENSG00000103489	0.286743	0.000149882		ENSG00000112414	0.190285	0.000606458
ENSG00000067798	-0.449692	4.77342e-14		ENSG00000099954	-0.146229	0.00167115		ENSG00000103811	0.128438	0.0125709		ENSG00000112576	0.247974	0.0426239
ENSG00000067900	0.15809	4.0465e-05		ENSG00000100100	0.126594	0.00138084		ENSG00000104324	0.288668	0.000528873		ENSG00000113269	0.243174	0.000606458
ENSG00000068878	0.11375	0.00223148		ENSG00000100311	0.214324	2.68847e-05		ENSG00000104763	0.33474	4.16697e-07		ENSG00000113749	-0.227559	0.0110659
ENSG00000069849	0.126644	7.78501e-07		ENSG00000100600	0.153998	0.0221284		ENSG00000104964	-0.130703	0.0228553		ENSG00000114251	-0.198372	0.00219287
ENSG00000070882	0.281372	1.08306e-13		ENSG00000101265	-0.15263	0.00741868		ENSG00000105339	-0.328894	0.00792239		ENSG00000114541	0.351901	0.000989844
ENSG00000072786	0.119437	0.000796107		ENSG00000101901	-0.124752	0.0394138		ENSG00000105366	0.207424	3.44217e-05		ENSG00000114770	0.234158	0.000226981
ENSG00000073417	0.287772	9.12421e-15		ENSG00000101974	-0.219724	0.000173137		ENSG00000105568	-0.108641	0.0110912		ENSG00000114861	0.358369	0.0113411
ENSG00000074416	0.220757	1.67029e-14		ENSG00000102172	0.111612	0.0438148		ENSG00000105639	-0.233451	0.00701334		ENSG00000115159	0.182151	0.0426239
ENSG00000074657	0.104636	3.19086e-05		ENSG00000102445	-0.207924	0.00371597		ENSG00000105697	-0.393108	3.27232e-08		ENSG00000115355	0.226323	0.00838023
ENSG00000074706	-0.145225	0.0165146		ENSG00000102531	0.164375	0.0327929		ENSG00000105810	0.238982	0.00794718		ENSG00000115762	-0.144043	0.0134973
ENSG00000074964	0.122447	2.54497e-05		ENSG00000102780	0.136858	0.000126136		ENSG00000105967	0.205314	0.00408694		ENSG00000115825	-0.227083	0.00941736
ENSG00000075240	0.102821	6.33884e-07		ENSG00000102908	0.148436	0.0466656		ENSG00000106617	0.299926	0.000321855		ENSG00000116668	0.129064	0.00658328
ENSG00000075391	0.186783	1.83877e-05		ENSG00000103034	-0.109407	0.00658509		ENSG00000106785	0.154566	0.00669594		ENSG00000116991	-0.344379	0.000126746
ENSG00000075420	0.226495	2.87031e-06		ENSG00000103489	0.277389	0.0010169		ENSG00000107242	-0.235877	2.42088e-07		ENSG00000117115	0.361429	0.0420255
ENSG00000075618	-0.138768	3.00797e-09		ENSG00000104093	0.194661	0.00186678		ENSG00000107263	0.225826	0.0265201		ENSG00000117154	-0.346963	0.00648987
ENSG00000075624	-0.109224	0.0160893		ENSG00000104205	0.167638	0.0153779		ENSG00000107560	-0.135665	0.00154598		ENSG00000118217	-0.194671	0.0461781
ENSG00000075884	0.147908	0.00262386		ENSG00000104324	0.177199	0.024814		ENSG00000107562	0.103965	0.0172491		ENSG00000118257	0.201807	0.00752727
ENSG00000076356	-0.102635	2.05316e-10		ENSG00000104763	0.376868	4.02942e-08		ENSG00000107798	0.247679	7.71105e-05		ENSG00000118985	0.366493	0.00915105
ENSG00000077063	-0.10799	0.0229251		ENSG00000105122	-0.110404	0.00326977		ENSG00000107957	0.244258	3.7589e-08		ENSG00000119772	0.211677	0.00258356
ENSG00000077238	-0.194725	6.84191e-07		ENSG00000105339	-0.411234	1.11081e-05		ENSG00000108306	0.168687	0.0164345		ENSG00000120457	0.159909	0.000200686
ENSG00000078124	0.210271	4.27503e-06		ENSG00000105366	0.122651	0.00569182		ENSG00000109458	0.19261	0.0186944		ENSG00000120594	0.280151	0.00566444
ENSG00000078328	-0.183173	0.00131338		ENSG00000105639	-0.258959	3.71639e-05		ENSG00000109466	-0.227015	0.00138325		ENSG00000122574	0.200154	0.00566444
ENSG00000078403	0.128834	0.000959685		ENSG00000105697	-0.449448	5.03649e-13		ENSG00000109654	-0.122173	0.00543366		ENSG00000122965	-0.135332	0.0131394
ENSG00000078674	0.117482	0.000951909		ENSG00000105939	-0.204519	0.00242222		ENSG00000109667	0.184448	0.0113038		ENSG00000123104	-0.33257	0.00566444
ENSG00000079156	-0.130113	1.14287e-07		ENSG00000105967	0.174087	0.022452		ENSG00000109906	0.324378	0.00948189		ENSG00000124702	-0.108027	0.026161
ENSG00000079215	0.277332	6.54805e-09		ENSG00000106034	-0.248202	0.00854463		ENSG00000109971	-0.146353	0.00277698		ENSG00000126016	-0.12971	0.00250984
ENSG00000079263	-0.10745	1.17652e-05		ENSG00000106565	-0.164341	5.65952e-05		ENSG00000110321	-0.118893	0.0108334		ENSG00000128294	0.125688	0.00815086
ENSG00000079277	-0.174065	4.64374e-06		ENSG00000106617	0.18602	0.0304689		ENSG00000111110	0.107089	0.0016421		ENSG00000128512	0.319208	0.00941736
ENSG00000079950	0.181011	6.62842e-07		ENSG00000106665	-0.133706	0.0204271		ENSG00000111490	-0.12831	0.000218321		ENSG00000128573	-0.565788	0.000137149
ENSG00000080546	0.182915	1.24415e-07		ENSG00000106868	0.229198	3.17601e-05		ENSG00000111885	0.222465	0.0100009		ENSG00000129515	0.195955	0.0191653
ENSG00000080824	-0.241269	6.85807e-06		ENSG00000107242	-0.231368	4.36971e-06		ENSG00000112149	0.229473	0.000309785		ENSG00000130340	0.159249	0.0377795
ENSG00000081913	0.153997	3.00111e-11		ENSG00000107263	0.210687	0.0212654		ENSG00000112414	0.147636	0.000195098		ENSG00000131067	-0.111699	0.0217451
ENSG00000082269	0.158599	2.91502e-05		ENSG00000107719	-0.214794	0.0203784		ENSG00000112576	0.268755	0.00315796		ENSG00000131446	0.242278	0.00221526
ENSG00000082996	0.336171	9.29194e-19		ENSG00000107738	-0.138122	0.0318814		ENSG00000113269	0.272105	0.00316055		ENSG00000132170	0.418562	9.546e-07
ENSG00000083223	0.180119	1.41699e-08		ENSG00000107798	0.272473	6.60547e-05		ENSG00000113583	-0.113966	0.00292222		ENSG00000132334	-0.510696	0.000173241
ENSG00000083312	0.144623	2.6636e-05		ENSG00000107957	0.216741	6.97432e-07		ENSG00000113749	-0.201266	0.00702637		ENSG00000132405	-0.393971	0.00384871
ENSG00000084731	-0.10051	7.20689e-08		ENSG00000107968	-0.214181	0.00209952		ENSG00000114251	-0.195815	7.57109e-05		ENSG00000132780	-0.12422	0.0427707
ENSG00000085449	0.108158	7.15666e-07		ENSG00000108239	0.15804	0.0361695		ENSG00000114541	0.350995	0.000387746		ENSG00000133104	0.112106	0.0451064
ENSG00000085514	0.159805	6.50241e-09		ENSG00000109180	-0.119584	0.0155983		ENSG00000114770	0.204086	7.57109e-05		ENSG00000133121	0.579181	5.79536e-06
ENSG00000086300	0.103656	3.63266e-05		ENSG00000109323	0.163745	0.0359037		ENSG00000114796	0.181951	0.000777946		ENSG00000133216	0.172354	0.0344537
ENSG00000087086	0.219369	0.0033609		ENSG00000109458	0.187251	0.00980501		ENSG00000114861	0.45261	5.55283e-05		ENSG00000133789	0.165243	0.0406546
ENSG00000087095	0.161023	4.87532e-06		ENSG00000109906	0.295165	0.00285988		ENSG00000114978	-0.107328	0.0484927		ENSG00000135540	0.863223	8.80588e-11
ENSG00000088448	0.17316	1.3539e-08		ENSG00000110079	0.12002	0.0452447		ENSG00000115159	0.211311	0.00338347		ENSG00000135678	0.664869	3.97282e-08
ENSG00000089041	0.223249	1.25475e-10		ENSG00000110092	-0.115186	0.0108338		ENSG00000115183	-0.213899	0.00792239		ENSG00000135821	-0.272208	0.001979
ENSG00000089127	0.12061	9.40877e-13		ENSG00000110324	0.120539	0.0419167		ENSG00000115306	-0.132551	0.0125663		ENSG00000135838	0.490267	1.27771e-06
ENSG00000089351	-0.152298	2.07685e-06		ENSG00000111110	0.106194	0.00286425		ENSG00000115548	0.120742	0.0480969		ENSG00000135916	-0.135484	0.0288472
ENSG00000089916	0.147485	6.70667e-06		ENSG00000111144	0.101028	0.0107254		ENSG00000115825	-0.280968	2.28987e-05		ENSG00000136040	0.250309	0.000315318
ENSG00000090104	0.264025	0.000195859		ENSG00000111252	0.140333	0.033908		ENSG00000116679	0.126762	0.0244757		ENSG00000136153	-0.149245	0.0330706
ENSG00000091039	0.214927	1.47598e-11		ENSG00000111885	0.249367	0.000656484		ENSG00000116991	-0.282298	0.00074651		ENSG00000136295	0.130871	0.00615603
ENSG00000091831	0.19016	2.17797e-12		ENSG00000112249	-0.171139	0.0253351		ENSG00000117115	0.318569	0.0087995		ENSG00000136478	0.159828	2.16688e-05
ENSG00000092439	0.13252	2.34501e-05		ENSG00000112414	0.164682	4.59906e-05		ENSG00000117154	-0.244304	0.0279441		ENSG00000136717	-0.335485	0.0354211
ENSG00000095585	-0.206569	9.84722e-07		ENSG00000112576	0.193829	0.0421564		ENSG00000117632	-0.132572	0.0320368		ENSG00000136732	0.23073	0.000563876
ENSG00000095951	0.16852	1.76108e-15		ENSG00000113269	0.250718	0.000416378		ENSG00000118257	0.186532	0.00440925		ENSG00000137145	0.317335	8.58216e-06
ENSG00000095970	0.115871	4.58059e-08		ENSG00000113719	0.15729	0.00757192		ENSG00000118263	0.211038	8.77003e-05		ENSG00000137193	-0.183002	0.0104076
ENSG00000096060	0.232709	0.00222422		ENSG00000113749	-0.174937	0.00150477		ENSG00000118515	0.207665	0.00316055		ENSG00000137959	0.473897	0.000356699
ENSG00000096384	-0.110617	0.00437925		ENSG00000114251	-0.218892	5.04782e-06		ENSG00000118689	0.234654	0.00745929		ENSG00000137965	0.188966	0.0218044
ENSG00000099139	0.102482	4.01947e-05		ENSG00000114541	0.426193	2.80674e-09		ENSG00000118855	0.147197	0.0273254		ENSG00000138639	0.323982	0.00628596
ENSG00000099308	-0.112232	3.95659e-08		ENSG00000114770	0.23863	2.26651e-06		ENSG00000118985	0.311772	0.00251329		ENSG00000138760	0.179781	0.0208122
ENSG00000099331	0.260315	2.31435e-12		ENSG00000114796	0.14895	0.0100558		ENSG00000119321	0.144551	0.0310107		ENSG00000139178	-0.173559	3.59098e-06
ENSG00000100077	0.147005	9.37069e-05		ENSG00000114861	0.41737	0.000607459		ENSG00000119655	0.108654	0.0291984		ENSG00000139436	0.167585	0.0476463
ENSG00000100083	0.120689	3.70802e-11		ENSG00000115159	0.286995	1.23562e-05		ENSG00000120457	0.15716	0.000131725		ENSG00000139974	0.179244	0.000373568
ENSG00000100100	0.120382	5.18787e-09		ENSG00000115183	-0.246266	0.000942469		ENSG00000120594	0.30451	0.000222762		ENSG00000140367	0.10603	0.0318479
ENSG00000100219	-0.121493	2.05558e-12		ENSG00000115756	0.113035	0.0334924		ENSG00000122574	0.201959	0.000186501		ENSG00000140526	0.135655	0.0489703
ENSG00000100239	-0.126192	0.000183966		ENSG00000115825	-0.250918	1.21661e-05		ENSG00000123094	-0.250682	0.0347871		ENSG00000140575	0.256272	0.000342503
ENSG00000100311	0.188632	5.28397e-07		ENSG00000115840	-0.101355	0.022452		ENSG00000123104	-0.30356	0.0011698		ENSG00000140678	0.325104	0.00566444
ENSG00000100330	0.105021	0.000936445		ENSG00000116641	0.124009	0.034077		ENSG00000123106	0.257192	0.000164091		ENSG00000141506	0.297336	0.00221904
ENSG00000100354	0.102634	0.00969996		ENSG00000116679	0.102732	0.0418727		ENSG00000123416	-0.25569	0.0123715		ENSG00000142583	-0.340864	0.00643166
ENSG00000100485	0.160395	6.18207e-09		ENSG00000116991	-0.287103	0.000175635		ENSG00000123684	-0.115865	0.0461255		ENSG00000143158	-0.135391	8.58216e-06
ENSG00000100600	0.154672	9.6767e-09		ENSG00000117020	0.194146	0.0299052		ENSG00000124762	-0.11627	0.0353975		ENSG00000143164	-0.26886	0.0157946
ENSG00000100644	0.150211	0.0111822		ENSG00000117115	0.334081	0.00533601		ENSG00000124813	-0.21559	0.0265041		ENSG00000144724	0.943921	2.08258e-09
ENSG00000100997	0.11875	0.000534083		ENSG00000117154	-0.421137	2.28538e-08		ENSG00000125257	-0.226381	0.0374187		ENSG00000145287	-0.18835	0.00573261
ENSG00000101294	0.138257	2.03905e-06		ENSG00000118257	0.148717	0.0133567		ENSG00000125730	-0.253262	0.00878069		ENSG00000145362	-0.256731	0.0439448
ENSG00000101336	-0.101404	0.0281155		ENSG00000118263	0.215447	1.11081e-05		ENSG00000125810	-0.115225	0.0113038		ENSG00000145431	0.240391	0.0363126
ENSG00000101347	0.103413	0.00520947		ENSG00000118689	0.282465	6.60547e-05		ENSG00000125944	-0.109665	0.0270075		ENSG00000145703	0.582743	1.21624e-18
ENSG00000101474	-0.127939	3.11096e-06		ENSG00000118705	-0.122563	0.00818379		ENSG00000126016	-0.126684	0.00298482		ENSG00000146070	0.194184	0.0277649
ENSG00000101745	0.159871	1.27833e-05		ENSG00000118922	-0.184195	0.00222647		ENSG00000128245	-0.236953	0.00468555		ENSG00000146090	-0.446319	0.000193413
ENSG00000101974	-0.19034	6.50241e-09		ENSG00000118985	0.325767	0.00143362		ENSG00000128512	0.35559	7.57109e-05		ENSG00000146376	0.291162	0.000410415
ENSG00000102172	0.134803	1.25063e-08		ENSG00000119655	0.129113	0.0273628		ENSG00000128573	-0.529358	2.36286e-09		ENSG00000148158	0.164702	0.0134973
ENSG00000102445	-0.135796	0.000258497		ENSG00000119729	0.182812	0.00915509		ENSG00000129226	0.105187	0.0246567		ENSG00000148341	-0.11562	0.00495176
ENSG00000102531	0.243889	2.52521e-09		ENSG00000119899	0.126965	0.00835486		ENSG00000129450	-0.116517	0.027444		ENSG00000149091	-0.141946	0.0184112
ENSG00000102699	0.156779	1.08436e-06		ENSG00000120251	-0.130321	0.0193687		ENSG00000131446	0.245002	1.81063e-05		ENSG00000149256	-0.255837	0.0344537
ENSG00000102763	0.128661	6.6314e-06		ENSG00000120457	0.151195	3.25444e-05		ENSG00000131507	-0.137392	0.0192204		ENSG00000149289	0.21594	0.00640162
ENSG00000102780	0.157311	3.01725e-14		ENSG00000120594	0.259394	0.00083925		ENSG00000131711	-0.272177	0.00792226		ENSG00000149970	-0.107329	0.039822
ENSG00000102893	0.120818	0.000572287		ENSG00000120889	-0.120843	0.0132751		ENSG00000131724	0.16772	0.0218619		ENSG00000150347	0.438603	6.53545e-08
ENSG00000102908	0.105006	0.0060134		ENSG00000120896	0.116977	0.000361415		ENSG00000131773	-0.236621	0.0240482		ENSG00000151623	0.231387	0.00710714
ENSG00000103489	0.426335	4.69497e-33		ENSG00000121210	-0.153924	0.0210055		ENSG00000132170	0.357743	6.85838e-07		ENSG00000152128	-1.14328	2.13967e-09
ENSG00000103657	0.137579	1.78484e-05		ENSG00000122547	0.212653	0.000263152		ENSG00000132334	-0.464106	2.08749e-06		ENSG00000152208	-1.03657	1.95623e-07
ENSG00000104093	0.256435	3.39472e-16		ENSG00000122574	0.152585	0.0101931		ENSG00000132530	0.256632	0.00072556		ENSG00000152217	-0.238046	0.0208122
ENSG00000104205	0.174357	5.12114e-07		ENSG00000122986	0.104731	0.00815553		ENSG00000132780	-0.171612	2.50511e-05		ENSG00000152229	-0.188633	0.0159856
ENSG00000104219	0.107075	2.18476e-05		ENSG00000123094	-0.375626	3.77497e-05		ENSG00000132965	-0.137734	0.00400899		ENSG00000152270	0.49206	0.000308303
ENSG00000104324	0.31154	3.39472e-16		ENSG00000123104	-0.309841	0.000154349		ENSG00000133121	0.465949	1.34485e-07		ENSG00000152689	0.188426	0.0112417
ENSG00000104368	-0.10174	7.47244e-14		ENSG00000123416	-0.203394	0.0299221		ENSG00000133657	-0.157708	0.0149956		ENSG00000152766	-0.158696	0.0207829
ENSG00000104447	0.192553	0.000166465		ENSG00000123643	0.112839	0.00850935		ENSG00000134250	0.201059	7.57109e-05		ENSG00000152767	0.201276	0.0173726
ENSG00000104763	0.421706	2.5378e-40		ENSG00000124126	-0.196333	0.0311282		ENSG00000134278	0.246826	1.96179e-05		ENSG00000153071	0.118401	0.0350773
ENSG00000105339	-0.329741	6.41731e-09		ENSG00000124357	0.166135	0.000201468		ENSG00000134532	-0.131613	0.0347871		ENSG00000153179	0.185332	0.049591
ENSG00000105366	0.115456	5.0816e-07		ENSG00000124762	-0.138642	0.00137853		ENSG00000135540	0.755677	8.83587e-14		ENSG00000153317	0.307551	0.00250984
ENSG00000105639	-0.216047	5.85794e-11		ENSG00000124783	-0.107042	0.0256661		ENSG00000135678	0.683138	3.97439e-10		ENSG00000154229	-0.780953	7.70583e-14
ENSG00000105697	-0.43366	1.88342e-35		ENSG00000124788	0.172101	0.0364648		ENSG00000135821	-0.225227	0.00138367		ENSG00000154274	-0.122878	0.0353835
ENSG00000105810	0.233256	8.49098e-08		ENSG00000124813	-0.192585	0.0203362		ENSG00000135838	0.356496	3.44776e-05		ENSG00000154639	-0.11985	0.0377795
ENSG00000105928	0.127402	9.74395e-12		ENSG00000125730	-0.242758	0.00358458		ENSG00000136040	0.173397	0.00241368		ENSG00000157107	0.273218	0.000442028
ENSG00000105967	0.16662	5.79269e-06		ENSG00000126016	-0.191453	1.38518e-11		ENSG00000136048	0.134603	0.0113183		ENSG00000157483	0.92624	7.70583e-14
ENSG00000106034	-0.212179	6.89007e-05		ENSG00000128245	-0.183561	0.00569182		ENSG00000136153	-0.105697	0.0437681		ENSG00000157657	0.22749	0.00261079
ENSG00000106415	0.102273	0.00152796		ENSG00000128487	-0.163299	0.0359037		ENSG00000136717	-0.29056	0.00277698		ENSG00000157827	0.300426	0.0110659
ENSG00000106565	-0.127305	2.80065e-09		ENSG00000128512	0.317466	0.000368613		ENSG00000136732	0.152893	0.00130292		ENSG00000157837	0.172125	0.0458016
ENSG00000106617	0.302714	1.65738e-11		ENSG00000128573	-0.700231	2.64767e-17		ENSG00000136842	0.111845	0.0172355		ENSG00000158813	0.278799	0.00752727
ENSG00000106785	0.126864	7.15666e-07		ENSG00000128656	-0.26054	0.00434778		ENSG00000136854	-0.121571	0.0355619		ENSG00000159788	0.201775	0.049749
ENSG00000106868	0.188821	1.10535e-14		ENSG00000128989	-0.123362	0.0219623		ENSG00000137145	0.205885	0.00110702		ENSG00000161011	0.190066	0.00329435
ENSG00000107242	-0.174257	1.39338e-11		ENSG00000129515	0.109212	0.0420197		ENSG00000137193	-0.145878	0.00309983		ENSG00000162374	-0.121956	0.0277649
ENSG00000107263	0.282542	1.4985e-09		ENSG00000130203	0.440661	0.000656484		ENSG00000137409	-0.158037	0.00543366		ENSG00000163468	-0.124062	0.0426239
ENSG00000107518	-0.113634	0.000626871		ENSG00000130208	0.166715	0.0391471		ENSG00000137942	-0.239948	0.000136457		ENSG00000163694	0.263651	0.039506
ENSG00000107643	0.115031	0.000253824		ENSG00000131446	0.267901	3.71414e-07		ENSG00000137959	0.354907	0.000401109		ENSG00000164124	0.272401	2.65666e-07
ENSG00000107719	-0.10488	0.0478555		ENSG00000131711	-0.281109	0.0024593		ENSG00000137965	0.222171	5.46362e-05		ENSG00000164136	0.219689	0.00473595
ENSG00000107738	-0.125388	0.000123952		ENSG00000131773	-0.356698	0.000183352		ENSG00000138078	-0.162311	0.0151925		ENSG00000164300	0.146807	0.0299088
ENSG00000107745	0.120789	8.51177e-05		ENSG00000132122	-0.264113	0.0161537		ENSG00000138639	0.335609	0.0014515		ENSG00000165029	0.245675	0.00710714
ENSG00000107798	0.275861	3.48625e-22		ENSG00000132155	0.110298	0.0459767		ENSG00000138670	0.227279	0.00372778		ENSG00000167081	0.197224	0.0372479
ENSG00000107957	0.272975	4.93495e-35		ENSG00000132170	0.501726	2.77649e-11		ENSG00000139974	0.157054	2.08749e-06		ENSG00000167601	0.232709	0.0158563
ENSG00000107968	-0.169004	6.21661e-05		ENSG00000132334	-0.436741	2.45499e-07		ENSG00000140391	-0.118222	0.00596626		ENSG00000168010	0.187648	0.0174935
ENSG00000108175	0.117953	6.54564e-05		ENSG00000132405	-0.272836	0.00960273		ENSG00000140575	0.212045	0.000269701		ENSG00000168329	-0.307943	0.00445051
ENSG00000108239	0.183061	1.1781e-07		ENSG00000132530	0.206234	0.00116169		ENSG00000140678	0.274159	0.000401109		ENSG00000168404	-0.106184	0.0203065
ENSG00000108306	0.162858	2.19492e-07		ENSG00000132589	-0.125781	0.00646519		ENSG00000141506	0.279108	0.000588119		ENSG00000168421	-0.178935	0.000356699
ENSG00000108669	0.213539	5.2145e-10		ENSG00000133121	0.594919	4.08015e-13		ENSG00000142583	-0.374103	9.62484e-06		ENSG00000168961	0.170251	0.0215164
ENSG00000109323	0.270671	1.25882e-14		ENSG00000133835	0.137262	0.00932578		ENSG00000143164	-0.237531	0.00538348		ENSG00000169756	0.239347	0.0308613
ENSG00000109458	0.187568	1.13289e-06		ENSG00000134250	0.176557	0.000819088		ENSG00000143198	0.108779	0.0267591		ENSG00000169967	0.207457	0.00129434
ENSG00000109466	-0.175395	5.14708e-08		ENSG00000134278	0.221586	8.26889e-05		ENSG00000143324	0.167731	0.00616452		ENSG00000170027	-0.240917	0.0214059
ENSG00000109667	0.171627	1.02906e-06		ENSG00000134352	-0.179729	0.040498		ENSG00000143507	0.146448	0.000777946		ENSG00000170396	0.715413	6.67822e-16
ENSG00000109794	0.127874	0.0121812		ENSG00000134532	-0.199585	0.000417822		ENSG00000143643	-0.112571	0.0313041		ENSG00000170458	-0.244589	0.0481877
ENSG00000109906	0.358683	1.3014e-11		ENSG00000134909	-0.129708	0.0413515		ENSG00000143870	-0.124651	0.0347871		ENSG00000170522	-0.113311	0.0329413
ENSG00000110324	0.124869	1.82824e-05		ENSG00000135298	-0.285624	0.00137835		ENSG00000144724	0.459282	0.000387746		ENSG00000170542	-0.31304	0.00277
ENSG00000110395	0.14197	2.61126e-05		ENSG00000135363	-0.134601	0.0113064		ENSG00000144749	-0.106661	0.0129355		ENSG00000170677	0.388781	0.00566444
ENSG00000110880	0.124351	2.51086e-05		ENSG00000135540	0.726636	1.75292e-16		ENSG00000145349	-0.189586	0.0275555		ENSG00000170802	0.149988	0.0468343
ENSG00000110911	0.107998	0.00208143		ENSG00000135678	0.679671	1.09246e-16		ENSG00000145362	-0.212026	0.0294172		ENSG00000170873	0.36406	0.00415068
ENSG00000111110	0.159875	5.86455e-23		ENSG00000135749	-0.194407	0.00543651		ENSG00000145431	0.38887	4.76955e-09		ENSG00000170921	0.462288	1.06019e-06
ENSG00000111144	0.150233	4.97649e-14		ENSG00000135838	0.419417	2.40593e-07		ENSG00000145703	0.488378	2.73847e-19		ENSG00000171132	0.42005	1.85473e-05
ENSG00000111269	0.123468	8.43144e-06		ENSG00000135929	0.138792	0.0117531		ENSG00000146070	0.178454	0.000704249		ENSG00000171587	0.437869	0.00258356
ENSG00000111885	0.333685	5.02782e-18		ENSG00000136040	0.171302	0.000156859		ENSG00000146090	-0.445549	6.95026e-06		ENSG00000171766	-0.118139	0.039822
ENSG00000112033	-0.112433	0.0188074		ENSG00000136238	-0.207276	0.000136568		ENSG00000146376	0.253601	0.000303943		ENSG00000171914	-0.417598	4.54775e-05
ENSG00000112149	0.321393	5.98906e-22		ENSG00000136295	0.108369	0.0128557		ENSG00000146409	0.182608	0.000421848		ENSG00000172216	-0.207873	0.0374374
ENSG00000112308	0.1035	0.00245413		ENSG00000136404	0.168975	0.0145955		ENSG00000147408	0.395038	0.00138949		ENSG00000172578	0.194028	0.0444654
ENSG00000112414	0.19374	1.31474e-16		ENSG00000136448	-0.119826	0.00745202		ENSG00000147649	-0.159832	0.0242792		ENSG00000172985	-0.417911	0.0131394
ENSG00000112576	0.235378	5.28397e-07		ENSG00000136717	-0.200903	0.0222284		ENSG00000148053	-0.169031	0.00669594		ENSG00000173391	0.299844	0.00272061
ENSG00000112584	0.101811	0.00109772		ENSG00000136732	0.221229	2.15348e-07		ENSG00000149256	-0.24631	0.00687957		ENSG00000173517	0.36214	7.15615e-06
ENSG00000112851	0.108397	0.0053896		ENSG00000136854	-0.108894	0.0253178		ENSG00000149269	-0.203505	0.000278934		ENSG00000173726	-0.138463	0.018572
ENSG00000113163	0.130093	0.00796712		ENSG00000136895	-0.174103	0.00146174		ENSG00000149289	0.242151	5.38333e-06		ENSG00000174473	0.244811	0.0110659
ENSG00000113269	0.28977	1.41276e-14		ENSG00000137145	0.236174	0.000177526		ENSG00000150347	0.437019	1.52884e-10		ENSG00000175354	-0.372269	0.00246218
ENSG00000113580	0.123984	0.00115694		ENSG00000137193	-0.133385	0.00143362		ENSG00000150991	-0.199789	0.0084265		ENSG00000175471	0.269687	0.000226981
ENSG00000113742	-0.150726	0.00131338		ENSG00000137575	0.225849	0.000314748		ENSG00000152128	-0.948106	7.84387e-09		ENSG00000175931	-0.149121	0.0277423
ENSG00000113749	-0.211955	6.86648e-15		ENSG00000137841	-0.146175	0.00308975		ENSG00000152208	-1.34643	1.69147e-22		ENSG00000176225	0.302054	0.0247459
ENSG00000113916	-0.126513	0.00249624		ENSG00000137942	-0.167079	0.00580007		ENSG00000152217	-0.283141	0.000747727		ENSG00000176658	0.143422	0.0267756
ENSG00000114166	0.145642	3.20534e-07		ENSG00000137959	0.3214	0.00144841		ENSG00000152270	0.528439	7.6511e-09		ENSG00000177030	-0.105256	0.0344537
ENSG00000114251	-0.208193	5.78431e-15		ENSG00000138326	-0.201674	0.00889332		ENSG00000152457	-0.106916	0.00866076		ENSG00000177119	0.151695	0.0439448
ENSG00000114279	-0.109471	7.68579e-05		ENSG00000138639	0.286166	0.00184938		ENSG00000152583	-0.234693	0.0125709		ENSG00000177548	-0.112745	0.0228016
ENSG00000114316	0.108662	9.17283e-05		ENSG00000138670	0.259893	0.0101571		ENSG00000152689	0.15511	0.00442721		ENSG00000177575	0.406245	0.0406546
ENSG00000114423	0.102692	0.000114116		ENSG00000138760	0.151325	0.00580007		ENSG00000152766	-0.141467	0.00846072		ENSG00000177707	-0.172039	0.000308303
ENSG00000114450	0.170441	2.466e-06		ENSG00000139117	0.104325	0.0094879		ENSG00000152767	0.161495	0.0373375		ENSG00000177853	0.167701	0.0408295
ENSG00000114480	0.102976	0.00704344		ENSG00000139178	-0.101213	0.00100801		ENSG00000152818	0.333569	2.09132e-05		ENSG00000178904	-0.100701	0.039822
ENSG00000114541	0.37334	1.44387e-16		ENSG00000139974	0.23509	1.05947e-09		ENSG00000153130	-0.103279	0.00211498		ENSG00000180817	-0.216368	1.16791e-05
ENSG00000114770	0.26175	1.45565e-25		ENSG00000140470	0.185732	0.0068237		ENSG00000154096	-0.128804	0.0125663		ENSG00000180891	0.201624	0.00340866
ENSG00000114796	0.191594	1.98712e-14		ENSG00000140575	0.160376	0.0022666		ENSG00000154229	-0.693852	1.20235e-17		ENSG00000181722	0.284949	0.0178283
ENSG00000114861	0.352533	2.6705e-09		ENSG00000140678	0.291279	0.000126136		ENSG00000154274	-0.107129	0.0256491		ENSG00000182541	-0.272159	0.0308613
ENSG00000115159	0.246018	3.21258e-14		ENSG00000140968	-0.208854	0.00113153		ENSG00000156113	0.374348	0.00396203		ENSG00000182923	-0.106707	0.0452822
ENSG00000115183	-0.18391	3.41722e-07		ENSG00000141506	0.289915	6.60547e-05		ENSG00000156976	-0.148124	0.0172491		ENSG00000182985	0.433975	9.11395e-07
ENSG00000115318	0.127587	3.11828e-07		ENSG00000142583	-0.318738	3.14356e-06		ENSG00000157087	-0.106241	0.00746214		ENSG00000183486	0.184131	0.0409477
ENSG00000115355	0.127691	0.000247218		ENSG00000143013	-0.124533	0.0242734		ENSG00000157107	0.267607	2.62106e-05		ENSG00000183621	0.290487	2.86742e-05
ENSG00000115548	0.11515	5.38589e-06		ENSG00000143158	-0.114882	8.23585e-07		ENSG00000157193	-0.121532	0.00157834		ENSG00000183765	-0.115393	0.0391057
ENSG00000115756	0.142227	2.49341e-09		ENSG00000143162	0.123269	0.0356516		ENSG00000157483	0.695736	2.96322e-11		ENSG00000184005	-0.974838	5.74334e-12
ENSG00000115825	-0.195226	7.45185e-09		ENSG00000143164	-0.203477	0.00651963		ENSG00000157601	0.170074	0.00325908		ENSG00000185215	0.246865	0.000137149
ENSG00000115904	0.107374	0.00300936		ENSG00000143507	0.135508	0.000976974		ENSG00000157657	0.261461	7.45021e-06		ENSG00000185477	0.228768	0.0277649
ENSG00000115919	0.17217	3.502e-07		ENSG00000143891	0.118911	0.0342809		ENSG00000157827	0.308972	0.00328162		ENSG00000186088	0.359695	1.54441e-07
ENSG00000115977	0.134551	0.000916638		ENSG00000144455	0.193401	0.0184197		ENSG00000160145	-0.111477	0.0376486		ENSG00000186417	0.737874	1.27771e-06
ENSG00000116044	0.152481	1.16707e-05		ENSG00000144668	-0.15552	0.0419167		ENSG00000162434	0.155933	0.0272233		ENSG00000186998	-0.128547	0.00643166
ENSG00000116191	-0.129079	3.63611e-05		ENSG00000144674	-0.20829	0.0083774		ENSG00000163032	-0.206317	0.0252939		ENSG00000187098	0.556089	3.58642e-11
ENSG00000116786	0.102109	1.57252e-06		ENSG00000144724	0.521401	8.23585e-07		ENSG00000163694	0.265725	0.0096599		ENSG00000187474	0.181675	0.000334913
ENSG00000116991	-0.259393	4.43126e-11		ENSG00000144959	0.12509	0.00564729		ENSG00000163814	0.132301	0.00721499		ENSG00000187672	-0.591918	1.61388e-08
ENSG00000117020	0.217801	1.70965e-08		ENSG00000145287	-0.183368	5.44312e-07		ENSG00000163823	-0.10234	0.0171942		ENSG00000188001	0.854262	1.27008e-14
ENSG00000117115	0.426761	2.16982e-15		ENSG00000145431	0.291692	1.6005e-05		ENSG00000164111	0.121852	0.00410588		ENSG00000188191	-0.140377	0.0397399
ENSG00000117154	-0.301363	4.96669e-10		ENSG00000145687	-0.180029	0.0434425		ENSG00000164124	0.214594	4.96895e-06		ENSG00000188641	0.804896	1.82547e-07
ENSG00000117616	0.109263	0.000367878		ENSG00000145703	0.570311	2.44394e-24		ENSG00000164136	0.172348	0.00138325		ENSG00000189050	0.109193	0.0277649
ENSG00000117984	0.284409	6.86181e-10		ENSG00000145864	-0.117264	0.0418727		ENSG00000164144	0.182426	0.002658		ENSG00000196083	-0.308473	0.00180185
ENSG00000118007	0.105567	0.010903		ENSG00000146070	0.237394	4.29435e-06		ENSG00000164300	0.152053	0.000195098		ENSG00000196369	-0.232553	0.0461781
ENSG00000118257	0.183633	6.13222e-12		ENSG00000146090	-0.422789	2.52504e-06		ENSG00000164327	0.174602	0.00880565		ENSG00000196730	0.167158	0.000709918
ENSG00000118263	0.19955	6.88523e-14		ENSG00000146376	0.235644	0.000173137		ENSG00000164463	0.130593	0.0412263		ENSG00000196814	-0.225061	0.0458016
ENSG00000118515	0.272187	2.88851e-15		ENSG00000146409	0.134808	0.00545475		ENSG00000164808	0.191655	0.0388984		ENSG00000197381	0.185866	0.00831995
ENSG00000118689	0.255379	4.94462e-11		ENSG00000147324	0.118724	0.00143362		ENSG00000165029	0.324151	7.00464e-07		ENSG00000197535	0.187433	0.039506
ENSG00000118785	0.481727	3.11096e-06		ENSG00000147454	-0.208793	0.0146458		ENSG00000165078	0.187255	0.0117819		ENSG00000197548	0.553078	3.07362e-08
ENSG00000118855	0.165703	1.95788e-07		ENSG00000148090	0.125808	0.0331556		ENSG00000165914	0.212415	0.00136026		ENSG00000197892	0.151974	0.0297034
ENSG00000118985	0.363536	8.96382e-15		ENSG00000148154	0.176533	0.0342717		ENSG00000166012	-0.122418	0.0342626		ENSG00000197965	-0.271452	0.00495176
ENSG00000119314	0.137752	4.66949e-05		ENSG00000148158	0.153198	0.00595436		ENSG00000166598	-0.19604	0.024465		ENSG00000198108	0.287779	0.0461978
ENSG00000119487	0.102156	0.00596104		ENSG00000149212	-0.158251	0.0222284		ENSG00000167081	0.232546	0.00846072		ENSG00000198879	0.341413	0.0112328
ENSG00000119655	0.144701	3.44526e-09		ENSG00000149256	-0.305631	5.45649e-05		ENSG00000167552	-0.11138	0.0400625		ENSG00000203747	-0.251601	0.0177316
ENSG00000119729	0.257885	2.89739e-18		ENSG00000149289	0.207309	4.42014e-06		ENSG00000167601	0.169374	0.0146641		ENSG00000204103	0.258636	0.00290066
ENSG00000120063	0.153542	0.000107607		ENSG00000150347	0.452012	3.75141e-13		ENSG00000168010	0.172213	0.00110702		ENSG00000204634	-0.259814	0.0344499
ENSG00000120251	-0.110761	0.0001573		ENSG00000150593	0.143215	0.00311621		ENSG00000168329	-0.26972	0.00687957		ENSG00000205336	-0.289439	0.00658328
ENSG00000120457	0.157302	1.66724e-19		ENSG00000150625	-0.19591	0.00637047		ENSG00000168490	-0.150745	0.020594		ENSG00000205726	0.216787	0.0114447
ENSG00000120594	0.314588	1.98712e-14		ENSG00000151090	0.142323	0.0359037		ENSG00000169122	0.217561	0.00373103		ENSG00000213585	-0.148305	0.00105718
ENSG00000120690	0.146882	8.89375e-05		ENSG00000151240	0.116726	0.0223308		ENSG00000169398	-0.25644	0.00291252		ENSG00000245848	0.136041	0.0295568
ENSG00000120885	-0.146244	0.0154628		ENSG00000151276	-0.138685	0.047028		ENSG00000169508	-0.139339	0.00277698		ENSG00000266028	-0.289603	0.0205688
ENSG00000120899	0.143166	4.87532e-06		ENSG00000152104	-0.163322	0.00102541		ENSG00000169554	0.303705	0.00786405
ENSG00000121210	-0.107018	0.00230529		ENSG00000152128	-0.992884	2.22549e-14		ENSG00000169967	0.160247	0.0353975
ENSG00000121879	0.109488	0.000583311		ENSG00000152208	-1.05749	1.03636e-10		ENSG00000170017	0.303463	0.000899004
ENSG00000121964	0.193336	3.15175e-06		ENSG00000152217	-0.335378	3.28414e-06		ENSG00000170027	-0.189689	0.023685
ENSG00000122547	0.173476	1.21358e-10		ENSG00000152270	0.441022	1.11081e-05		ENSG00000170396	0.575673	8.61786e-13
ENSG00000122574	0.275159	6.75771e-24		ENSG00000152315	-0.171941	0.0437606		ENSG00000170522	-0.11782	0.000125504
ENSG00000123066	0.128617	0.00466648		ENSG00000152689	0.15585	0.00170762		ENSG00000170525	-0.198044	0.0492997
ENSG00000123094	-0.338422	4.6007e-12		ENSG00000152766	-0.125787	0.00162047		ENSG00000170542	-0.341963	3.18774e-06
ENSG00000123095	-0.123723	0.0011508		ENSG00000152767	0.239889	0.000314149		ENSG00000170677	0.350886	0.000786793
ENSG00000123104	-0.283712	2.39113e-10		ENSG00000152818	0.2632	0.000680888		ENSG00000170791	-0.114707	0.00400899
ENSG00000123106	0.210984	3.25974e-08		ENSG00000153046	-0.212194	0.000555952		ENSG00000170873	0.396754	3.38249e-05
ENSG00000123124	0.131472	5.38589e-06		ENSG00000153179	0.224779	0.000967424		ENSG00000170921	0.483741	3.54236e-09
ENSG00000123384	0.11848	0.000156147		ENSG00000153208	0.279084	0.0040373		ENSG00000171132	0.42442	1.17549e-07
ENSG00000123416	-0.173456	0.000516003		ENSG00000153317	0.301833	0.000158969		ENSG00000171316	-0.201122	0.0160499
ENSG00000123636	0.115513	0.0119835		ENSG00000154229	-0.672365	1.09246e-16		ENSG00000171587	0.565129	3.1688e-07
ENSG00000124126	-0.164823	0.00184828		ENSG00000155846	0.118285	0.0327929		ENSG00000171617	-0.167512	0.0105405
ENSG00000124151	0.110876	0.00773861		ENSG00000156113	0.323958	0.00771668		ENSG00000171631	-0.105716	0.00305289
ENSG00000124357	0.163796	9.30678e-13		ENSG00000156171	0.135229	0.0151098		ENSG00000171700	-0.114842	0.0208146
ENSG00000124788	0.225671	6.71475e-07		ENSG00000156467	-0.118627	0.0337972		ENSG00000171867	-0.142395	0.044739
ENSG00000124813	-0.171926	1.70219e-05		ENSG00000157107	0.321851	1.6814e-08		ENSG00000171914	-0.393413	1.18383e-08
ENSG00000125257	-0.223414	7.58303e-07		ENSG00000157483	0.805448	2.74534e-17		ENSG00000172115	-0.105028	0.0121354
ENSG00000125703	0.104937	0.00107039		ENSG00000157657	0.188052	0.0021354		ENSG00000172216	-0.157143	0.0279599
ENSG00000125730	-0.206008	2.85224e-06		ENSG00000157827	0.241271	0.0273628		ENSG00000172260	-0.154538	0.0330516
ENSG00000126016	-0.106119	1.56065e-09		ENSG00000159216	-0.380047	6.60547e-05		ENSG00000172456	0.166994	0.00583107
ENSG00000126217	-0.116948	0.00550616		ENSG00000159314	-0.118854	0.00535274		ENSG00000172578	0.200429	0.0159207
ENSG00000126821	0.16253	3.72631e-08		ENSG00000159399	-0.157859	0.00748404		ENSG00000172667	-0.16983	0.0486794
ENSG00000127124	-0.184439	0.000495838		ENSG00000161011	0.136438	0.0145955		ENSG00000172985	-0.320265	0.00831645
ENSG00000127947	0.160185	6.63322e-07		ENSG00000163406	-0.117396	0.0304689		ENSG00000173193	0.189391	0.0369167
ENSG00000128512	0.311374	4.6007e-12		ENSG00000163694	0.236843	0.00947773		ENSG00000173258	-0.109482	0.0246471
ENSG00000128573	-0.674466	4.01313e-42		ENSG00000163803	-0.135715	0.00567608		ENSG00000173517	0.322899	2.67698e-05
ENSG00000128656	-0.201998	0.000103628		ENSG00000163932	-0.123094	0.0272217		ENSG00000173530	-0.208021	0.000353802
ENSG00000128805	-0.117829	0.0275331		ENSG00000164111	0.137677	0.00734518		ENSG00000174123	-0.141765	0.000233742
ENSG00000129084	0.119982	0.0036943		ENSG00000164124	0.183198	0.000263152		ENSG00000174473	0.221759	0.00138949
ENSG00000129226	0.109813	1.89632e-08		ENSG00000164136	0.182472	0.00056935		ENSG00000175354	-0.297267	0.00673116
ENSG00000129422	-0.132664	3.17971e-05		ENSG00000164144	0.157406	0.0106373		ENSG00000175471	0.316304	2.28818e-07
ENSG00000129534	0.14443	7.91024e-05		ENSG00000164300	0.120912	0.00822447		ENSG00000175931	-0.123878	0.0389677
ENSG00000130066	0.238872	2.97694e-06		ENSG00000164327	0.156258	0.00995085		ENSG00000176225	0.393243	0.000353802
ENSG00000130203	0.336627	1.66543e-08		ENSG00000164543	-0.137251	0.00569182		ENSG00000176597	-0.153615	0.0244757
ENSG00000130208	0.1291	0.000111121		ENSG00000165029	0.343501	1.77999e-08		ENSG00000176771	0.260107	0.0298891
ENSG00000130340	0.170915	8.03457e-08		ENSG00000165322	-0.175592	0.0193687		ENSG00000176788	-0.218872	0.00292222
ENSG00000130844	0.105023	1.17907e-05		ENSG00000165914	0.144435	0.027327		ENSG00000177575	0.533711	0.00022284
ENSG00000131323	0.118949	0.00129328		ENSG00000166035	-0.144027	0.00083925		ENSG00000177694	0.290573	0.0063301
ENSG00000131446	0.264453	1.73747e-19		ENSG00000166165	-0.164134	0.0305015		ENSG00000177707	-0.131319	0.00263552
ENSG00000131558	0.140871	0.0011378		ENSG00000167081	0.294645	7.24037e-05		ENSG00000180263	0.108877	0.00400899
ENSG00000131711	-0.233815	2.13261e-06		ENSG00000167601	0.222602	0.000187705		ENSG00000180817	-0.234246	3.97439e-10
ENSG00000131773	-0.295828	1.62135e-10		ENSG00000168010	0.18003	0.000300151		ENSG00000181722	0.343945	1.27297e-05
ENSG00000132122	-0.181914	0.00101435		ENSG00000168329	-0.297423	0.00118139		ENSG00000182185	0.223545	0.0359968
ENSG00000132155	0.11752	4.06568e-05		ENSG00000168421	-0.175813	1.30877e-06		ENSG00000182197	-0.187227	0.0299959
ENSG00000132170	0.495927	5.5967e-36		ENSG00000168785	-0.12739	0.000656484		ENSG00000182389	-0.310679	0.00155906
ENSG00000132294	0.137601	6.40553e-07		ENSG00000168958	-0.130863	0.00704552		ENSG00000182541	-0.274187	0.00118392
ENSG00000132334	-0.40652	9.57518e-16		ENSG00000169398	-0.273578	0.000155765		ENSG00000182985	0.271993	3.95709e-08
ENSG00000132405	-0.220223	9.18281e-05		ENSG00000169508	-0.142533	0.047028		ENSG00000183454	-0.102052	0.037547
ENSG00000132530	0.211248	4.00436e-11		ENSG00000169554	0.302465	6.60547e-05		ENSG00000183486	0.185797	0.0111011
ENSG00000132549	0.122635	0.00411809		ENSG00000169756	0.210443	0.031676		ENSG00000183621	0.187452	0.00301091
ENSG00000132639	-0.184135	0.0171748		ENSG00000169896	-0.232976	6.86831e-05		ENSG00000184005	-1.03493	1.08122e-17
ENSG00000132669	0.125919	0.00334016		ENSG00000169967	0.222292	0.00122616		ENSG00000184014	0.187078	0.00957599
ENSG00000132780	-0.10443	3.37775e-07		ENSG00000170017	0.287784	0.00575649		ENSG00000184060	0.169379	0.0319659
ENSG00000133106	0.239917	8.05481e-09		ENSG00000170027	-0.156178	0.0189599		ENSG00000185158	0.119705	0.00115175
ENSG00000133121	0.689983	1.46581e-42		ENSG00000170315	-0.117372	0.0474638		ENSG00000185215	0.197236	2.22684e-05
ENSG00000133216	0.122736	3.35838e-06		ENSG00000170396	0.579433	1.06568e-15		ENSG00000186088	0.235763	0.000757536
ENSG00000133789	0.151986	1.36616e-05		ENSG00000170525	-0.238307	0.0128557		ENSG00000186417	0.595487	2.56442e-05
ENSG00000133812	0.180053	6.74685e-06		ENSG00000170542	-0.278257	0.000154349		ENSG00000186654	-0.111085	0.0316674
ENSG00000133835	0.120875	4.60705e-06		ENSG00000170571	-0.123528	0.0287455		ENSG00000186815	0.164611	0.0238068
ENSG00000134250	0.207209	2.50633e-16		ENSG00000170638	-0.111764	0.000668388		ENSG00000187068	-0.110011	0.000690937
ENSG00000134278	0.237456	9.81492e-17		ENSG00000170677	0.379231	3.71979e-05		ENSG00000187098	0.489729	1.60862e-10
ENSG00000134352	-0.176338	1.71186e-05		ENSG00000170791	-0.110386	0.000598117		ENSG00000187474	0.290187	2.94228e-12
ENSG00000134369	0.150474	2.06683e-11		ENSG00000170873	0.413368	1.2712e-06		ENSG00000187672	-0.631291	3.61396e-12
ENSG00000134516	0.143258	0.00190445		ENSG00000170921	0.404843	1.09754e-08		ENSG00000187715	-0.234831	0.000216503
ENSG00000134532	-0.114232	0.000765528		ENSG00000170946	-0.102239	0.00222647		ENSG00000188001	0.577222	4.13864e-09
ENSG00000134686	-0.150062	0.000572287		ENSG00000171132	0.384263	2.5801e-08		ENSG00000188641	0.876513	1.29933e-10
ENSG00000134769	0.267249	3.03505e-09		ENSG00000171316	-0.160423	0.0329921		ENSG00000189067	0.154457	0.0302126
ENSG00000135124	0.121173	2.04624e-06		ENSG00000171587	0.498678	5.35092e-05		ENSG00000196083	-0.194307	0.019088
ENSG00000135298	-0.188412	2.72185e-05		ENSG00000171603	-0.111109	0.0304689		ENSG00000196116	0.110811	0.0404007
ENSG00000135540	0.778223	2.5692e-41		ENSG00000171617	-0.132185	0.00946292		ENSG00000196141	0.234733	0.00277698
ENSG00000135678	0.830006	8.96553e-56		ENSG00000171729	0.174709	0.00945694		ENSG00000196369	-0.184082	0.0322582
ENSG00000135749	-0.151812	0.000123471		ENSG00000171791	0.299245	0.0011809		ENSG00000196586	-0.167643	1.15474e-05
ENSG00000135821	-0.134913	0.000403354		ENSG00000171914	-0.500115	2.74869e-12		ENSG00000196730	0.115867	0.00430447
ENSG00000135837	0.13372	0.000316448		ENSG00000172216	-0.140449	0.0359037		ENSG00000197381	0.119053	0.0342626
ENSG00000135838	0.414621	3.65049e-24		ENSG00000172456	0.158869	0.0193687		ENSG00000197548	0.521368	2.96322e-11
ENSG00000135929	0.140863	4.0147e-07		ENSG00000172578	0.140644	0.0380564		ENSG00000197594	0.135495	0.00673116
ENSG00000136040	0.264623	1.44357e-26		ENSG00000172667	-0.192826	0.0125109		ENSG00000198108	0.22502	0.032512
ENSG00000136048	0.104789	6.71475e-07		ENSG00000172985	-0.307855	0.00648489		ENSG00000198373	0.13346	0.0486098
ENSG00000136141	0.150771	0.000280171		ENSG00000173391	0.256631	0.0351288		ENSG00000198382	0.166495	0.0228116
ENSG00000136295	0.144374	8.43585e-14		ENSG00000173517	0.330744	2.61203e-06		ENSG00000198879	0.412726	0.000149882
ENSG00000136478	0.101509	2.17353e-08		ENSG00000173530	-0.108422	0.031015		ENSG00000203747	-0.207295	0.0163969
ENSG00000136560	0.176424	1.28532e-07		ENSG00000173905	0.16985	0.001906		ENSG00000204103	0.280942	2.56442e-05
ENSG00000136717	-0.260891	5.6451e-09		ENSG00000174123	-0.128564	0.00157881		ENSG00000204389	-0.411759	0.00480761
ENSG00000136732	0.24637	9.7844e-23		ENSG00000174437	-0.145187	0.0247855		ENSG00000205336	-0.2427	0.00301091
ENSG00000136813	0.116533	0.000122636		ENSG00000174473	0.187427	0.00128709		ENSG00000205726	0.146873	0.00792239
ENSG00000136895	-0.134807	3.41147e-06		ENSG00000175354	-0.219858	0.0256418		ENSG00000213047	0.131589	0.0120343
ENSG00000137145	0.310817	3.27531e-21		ENSG00000175471	0.328646	1.88021e-09		ENSG00000214517	-0.105436	0.0291757
ENSG00000137312	-0.109499	4.46284e-05		ENSG00000176597	-0.182566	0.0203362		ENSG00000214787	0.154141	0.0291757
ENSG00000137393	0.175191	2.00754e-05		ENSG00000176658	0.134648	0.00270741		ENSG00000219481	0.162933	0.000401109
ENSG00000137575	0.266581	1.01008e-16		ENSG00000177575	0.391828	0.000211697		ENSG00000220205	-0.188284	0.0125709
ENSG00000137642	0.120689	0.0169679		ENSG00000177706	0.117801	0.0304689		ENSG00000235162	-0.158904	0.0105837
ENSG00000137764	0.113271	0.00160035		ENSG00000177707	-0.146168	1.11081e-05		ENSG00000244754	0.16239	0.00965551
ENSG00000137959	0.413501	6.67082e-21		ENSG00000178980	-0.115257	0.0291994		ENSG00000245848	0.193891	1.20906e-06
ENSG00000137965	0.202912	1.20501e-17		ENSG00000179912	-0.13364	0.047028		ENSG00000248905	0.328701	0.0165493
ENSG00000138069	0.110532	0.00301795		ENSG00000180817	-0.147822	0.00104314		ENSG00000258227	0.156417	0.000528873
ENSG00000138134	-0.120719	0.000442899		ENSG00000181631	-0.113776	0.0219109		ENSG00000261371	0.168774	0.00874595
ENSG00000138639	0.282666	6.0404e-09		ENSG00000181722	0.209637	0.0273628
ENSG00000138640	-0.110701	0.0240496		ENSG00000182197	-0.171581	0.0254112
ENSG00000138670	0.290099	1.17944e-20		ENSG00000182389	-0.215638	0.00734518
ENSG00000138756	0.14139	0.00457985		ENSG00000182541	-0.218415	0.00337196
ENSG00000138760	0.188121	5.91612e-13		ENSG00000182578	-0.196218	0.00995085
ENSG00000138964	0.167107	1.3161e-07		ENSG00000182985	0.361608	5.94646e-09
ENSG00000139117	0.144077	1.1631e-11		ENSG00000183454	-0.109918	0.0107832
ENSG00000139132	0.184153	7.62088e-05		ENSG00000183486	0.118635	0.0419167
ENSG00000139173	0.20805	3.51137e-07		ENSG00000184005	-0.898535	2.64767e-17
ENSG00000139178	-0.120823	9.58051e-13		ENSG00000185215	0.238073	2.77507e-07
ENSG00000139793	0.104134	0.00973407		ENSG00000185630	-0.137898	0.00167451
ENSG00000139946	0.160652	8.71543e-06		ENSG00000186088	0.250971	0.000177526
ENSG00000139974	0.245473	2.77479e-32		ENSG00000186417	0.79496	6.3885e-11
ENSG00000140396	0.140769	0.000908373		ENSG00000186635	0.148775	0.00590675
ENSG00000140443	0.130131	1.59412e-05		ENSG00000186815	0.159218	0.00717488
ENSG00000140455	0.105911	0.00471408		ENSG00000187068	-0.105979	0.000417822
ENSG00000140470	0.227809	1.55318e-08		ENSG00000187098	0.619108	1.75292e-16
ENSG00000140526	0.107298	6.71967e-05		ENSG00000187474	0.206603	1.38863e-07
ENSG00000140575	0.266448	1.82366e-21		ENSG00000187672	-0.558965	1.55665e-11
ENSG00000140678	0.402484	8.37426e-30		ENSG00000187764	-0.155493	0.00569182
ENSG00000140743	0.10316	0.000103708		ENSG00000188001	0.643384	1.96716e-13
ENSG00000140836	0.173077	0.000208528		ENSG00000188641	0.901432	6.77823e-15
ENSG00000140968	-0.201335	6.09089e-10		ENSG00000189067	0.189699	0.000933771
ENSG00000141376	0.136674	0.00241951		ENSG00000196083	-0.17794	0.0193687
ENSG00000141447	0.16312	1.39273e-06		ENSG00000196141	0.225183	0.000126878
ENSG00000141506	0.292314	7.26355e-13		ENSG00000196369	-0.241072	0.0203362
ENSG00000141664	0.130741	3.44495e-07		ENSG00000196396	-0.143896	0.0273628
ENSG00000141837	0.142978	0.0117325		ENSG00000196730	0.115566	0.000416378
ENSG00000142197	0.160552	1.33083e-07		ENSG00000197381	0.119006	0.00143362
ENSG00000142583	-0.378975	4.50798e-23		ENSG00000197535	0.149917	0.0345004
ENSG00000142599	0.131441	0.00222816		ENSG00000197548	0.59132	3.27501e-16
ENSG00000143162	0.122123	1.68983e-06		ENSG00000197594	0.151727	0.0246713
ENSG00000143164	-0.154907	0.000258711		ENSG00000197859	-0.106296	0.0282487
ENSG00000143190	0.126108	0.000228681		ENSG00000197965	-0.20472	0.00137853
ENSG00000143207	0.134853	0.00238868		ENSG00000198431	0.130976	0.0222284
ENSG00000143324	0.158085	2.34245e-06		ENSG00000198873	-0.13855	0.0060045
ENSG00000143353	0.186853	5.67561e-12		ENSG00000198879	0.338064	0.000118545
ENSG00000143507	0.174849	8.18207e-15		ENSG00000198961	-0.116887	0.0380564
ENSG00000143669	0.128365	0.00196521		ENSG00000203747	-0.252962	0.00027511
ENSG00000143772	0.116125	1.51683e-05		ENSG00000204103	0.247432	3.94641e-06
ENSG00000143891	0.121271	3.17107e-11		ENSG00000204389	-0.505963	0.000247574
ENSG00000143951	0.140226	1.01127e-05		ENSG00000204472	-0.11265	0.025884
ENSG00000144036	0.100906	0.00689208		ENSG00000204482	-0.115483	0.0193687
ENSG00000144455	0.112964	0.0240206		ENSG00000205336	-0.324748	1.32656e-07
ENSG00000144668	-0.237124	1.15934e-09		ENSG00000205542	-0.294691	0.00567608
ENSG00000144674	-0.152175	0.00103661		ENSG00000205726	0.139041	0.0212765
ENSG00000144724	0.996873	1.90776e-41		ENSG00000213047	0.140211	0.0083774
ENSG00000144959	0.115137	2.30721e-06		ENSG00000214787	0.127086	0.00807645
ENSG00000145012	0.167792	0.000190736		ENSG00000235162	-0.224725	1.70384e-05
ENSG00000145287	-0.190748	3.87521e-20		ENSG00000248905	0.354951	0.000517893
ENSG00000145349	-0.138764	0.00108608		ENSG00000258227	0.119263	0.00942108
ENSG00000145431	0.370927	6.20539e-25		ENSG00000278540	-0.179275	0.00255548
ENSG00000145703	0.598359	1.00274e-77
ENSG00000145715	0.140109	0.000288528
ENSG00000145743	0.13107	0.00126839
ENSG00000145779	0.106106	0.00126966
ENSG00000146070	0.201759	1.27125e-14
ENSG00000146090	-0.370972	1.37203e-14
ENSG00000146376	0.321164	1.08626e-21
ENSG00000146409	0.152373	1.66703e-12
ENSG00000146555	0.165952	0.00581214
ENSG00000147324	0.140351	6.86039e-11
ENSG00000147408	0.213374	0.000515141
ENSG00000147416	0.11392	9.94267e-05
ENSG00000147454	-0.114872	0.0242376
ENSG00000147459	0.17419	6.89007e-05
ENSG00000147905	0.100478	0.0310471
ENSG00000148090	0.182048	6.95623e-10
ENSG00000148154	0.160367	5.50028e-05
ENSG00000148158	0.153136	7.60179e-09
ENSG00000148180	0.113427	0.00417572
ENSG00000148219	0.149989	1.79338e-09
ENSG00000148484	0.120512	3.36184e-05
ENSG00000149256	-0.222554	3.49891e-08
ENSG00000149269	-0.135695	5.66496e-07
ENSG00000149289	0.198461	2.29821e-12
ENSG00000150093	0.106159	1.6543e-05
ENSG00000150347	0.523844	4.42256e-47
ENSG00000150593	0.195046	2.27423e-14
ENSG00000150625	-0.116819	0.00596601
ENSG00000150782	0.105132	0.00416428
ENSG00000150991	-0.130362	0.00011015
ENSG00000151090	0.196769	6.59745e-08
ENSG00000151240	0.172345	4.96669e-10
ENSG00000151276	-0.157053	1.21085e-06
ENSG00000151414	0.147581	7.87036e-06
ENSG00000151491	0.153794	0.00070268
ENSG00000151623	0.175336	6.84068e-09
ENSG00000151694	0.194352	2.27554e-12
ENSG00000151726	0.274443	6.96075e-05
ENSG00000151746	0.193164	4.20582e-08
ENSG00000151893	0.10913	9.35001e-05
ENSG00000152061	0.108645	0.011236
ENSG00000152128	-0.987109	4.42796e-35
ENSG00000152208	-1.0831	6.07349e-42
ENSG00000152217	-0.229076	9.07661e-09
ENSG00000152229	-0.110882	0.000320953
ENSG00000152270	0.537272	6.53105e-27
ENSG00000152520	0.159269	2.97443e-05
ENSG00000152583	-0.12008	0.0261
ENSG00000152689	0.259546	5.81355e-20
ENSG00000152766	-0.137169	3.98079e-08
ENSG00000152767	0.202595	2.65806e-08
ENSG00000152818	0.251101	2.70537e-10
ENSG00000153071	0.126532	1.3117e-10
ENSG00000153113	0.100083	0.00322666
ENSG00000153179	0.250276	2.89739e-18
ENSG00000153208	0.265459	1.02211e-06
ENSG00000153317	0.359045	1.95542e-18
ENSG00000153707	-0.119672	0.0047715
ENSG00000153936	0.101401	0.00678342
ENSG00000154122	0.136236	4.98852e-05
ENSG00000154146	-0.119178	0.0285732
ENSG00000154229	-0.696186	9.73084e-54
ENSG00000154237	0.16195	0.000165638
ENSG00000154274	-0.130219	4.85841e-10
ENSG00000154447	0.148143	2.5758e-05
ENSG00000154655	0.178819	9.84182e-06
ENSG00000155097	0.123749	2.16347e-06
ENSG00000155111	0.151576	1.34351e-05
ENSG00000155307	0.161345	0.000267566
ENSG00000155629	-0.114651	0.0192922
ENSG00000155846	0.121535	5.56734e-07
ENSG00000156052	0.120926	0.00712074
ENSG00000156110	0.165476	0.000370069
ENSG00000156113	0.388526	2.19748e-10
ENSG00000156273	-0.144413	0.020696
ENSG00000156299	-0.1435	0.00125273
ENSG00000156639	0.10398	0.0341537
ENSG00000156831	0.126307	0.0022675
ENSG00000156869	0.140315	2.3203e-12
ENSG00000156931	0.193105	4.04321e-08
ENSG00000157107	0.309303	1.68178e-17
ENSG00000157193	-0.11595	9.20308e-11
ENSG00000157483	0.911988	8.47998e-64
ENSG00000157540	0.124682	0.00226615
ENSG00000157601	0.187482	1.84628e-14
ENSG00000157657	0.309162	9.75064e-23
ENSG00000157827	0.304054	1.98894e-08
ENSG00000157837	0.16027	2.20496e-06
ENSG00000158092	0.124201	1.59218e-05
ENSG00000158813	0.207197	8.69279e-07
ENSG00000159216	-0.300794	7.24149e-07
ENSG00000159399	-0.114625	0.000110939
ENSG00000159788	0.165751	1.04575e-06
ENSG00000160014	-0.126776	0.0033634
ENSG00000160712	0.110878	0.000164348
ENSG00000161011	0.141027	2.04632e-10
ENSG00000161791	0.110782	0.00966835
ENSG00000162434	0.111988	0.00146466
ENSG00000162496	0.107268	9.07024e-05
ENSG00000162599	0.152235	0.00048136
ENSG00000162869	0.120379	1.6513e-05
ENSG00000163032	-0.124952	0.00378827
ENSG00000163110	0.138066	3.57651e-08
ENSG00000163131	0.130533	7.87036e-06
ENSG00000163539	0.137705	3.83832e-05
ENSG00000163590	0.185557	2.41712e-08
ENSG00000163625	-0.124132	0.00897382
ENSG00000163694	0.32181	7.75985e-11
ENSG00000163814	0.116729	1.30694e-08
ENSG00000164111	0.147803	1.66835e-12
ENSG00000164124	0.185463	8.14425e-17
ENSG00000164136	0.246019	6.77158e-18
ENSG00000164144	0.170143	1.65772e-08
ENSG00000164190	0.126949	0.00170807
ENSG00000164300	0.152073	2.02032e-12
ENSG00000164327	0.163519	2.25399e-06
ENSG00000164329	0.140478	4.46891e-05
ENSG00000164463	0.111199	4.59192e-05
ENSG00000164733	0.156899	0.00312395
ENSG00000164808	0.221883	6.63339e-08
ENSG00000164830	-0.136231	0.0315409
ENSG00000164983	0.104798	0.00400473
ENSG00000165029	0.275479	1.76316e-13
ENSG00000165078	0.176128	1.33083e-07
ENSG00000165181	-0.118831	0.00974861
ENSG00000165209	0.118494	0.000518105
ENSG00000165322	-0.126639	0.0017606
ENSG00000165914	0.165961	5.14883e-09
ENSG00000166165	-0.140463	0.00205418
ENSG00000166598	-0.105867	0.00613238
ENSG00000166927	0.247433	4.52025e-08
ENSG00000166928	0.110851	5.4869e-07
ENSG00000166949	0.109723	0.00337962
ENSG00000166963	-0.106394	0.00181696
ENSG00000167081	0.230409	1.27502e-08
ENSG00000167291	0.153267	0.000375207
ENSG00000167601	0.182629	3.20615e-09
ENSG00000168010	0.208667	7.96809e-16
ENSG00000168036	0.129441	6.03936e-05
ENSG00000168329	-0.269102	7.50787e-12
ENSG00000168421	-0.105408	1.01361e-06
ENSG00000168918	-0.130522	0.0119288
ENSG00000168961	0.119526	6.96679e-07
ENSG00000169122	0.147774	0.000107992
ENSG00000169398	-0.195779	1.90005e-06
ENSG00000169499	0.180257	1.12423e-08
ENSG00000169554	0.239759	3.22377e-07
ENSG00000169756	0.303871	2.91351e-12
ENSG00000169896	-0.109619	0.00022816
ENSG00000169967	0.19966	5.32257e-09
ENSG00000170017	0.366166	2.29593e-15
ENSG00000170027	-0.119669	0.000943182
ENSG00000170396	0.701062	5.33025e-55
ENSG00000170430	0.109771	0.000521293
ENSG00000170458	-0.1726	8.98657e-06
ENSG00000170525	-0.158442	0.000859192
ENSG00000170542	-0.311431	1.57151e-17
ENSG00000170571	-0.105969	0.000123984
ENSG00000170634	0.149598	2.97443e-05
ENSG00000170677	0.331974	9.22923e-13
ENSG00000170802	0.129728	4.22717e-06
ENSG00000170873	0.400969	1.19878e-17
ENSG00000170921	0.488526	1.19933e-28
ENSG00000171132	0.459589	5.97761e-28
ENSG00000171310	-0.179117	0.00102377
ENSG00000171316	-0.117285	0.0034403
ENSG00000171488	-0.112491	0.0408558
ENSG00000171587	0.569939	1.03412e-25
ENSG00000171603	-0.100941	3.13562e-05
ENSG00000171617	-0.125987	8.6194e-06
ENSG00000171681	0.183691	2.12468e-07
ENSG00000171729	0.149959	8.97008e-06
ENSG00000171791	0.278003	1.18241e-09
ENSG00000171914	-0.457155	3.32141e-36
ENSG00000171943	-0.153295	4.40876e-05
ENSG00000172216	-0.114772	0.000791662
ENSG00000172260	-0.108918	0.00158428
ENSG00000172456	0.190709	6.37965e-12
ENSG00000172578	0.285011	1.58206e-18
ENSG00000172667	-0.126099	0.000725629
ENSG00000172765	0.220461	4.20743e-10
ENSG00000172869	0.115087	0.000106815
ENSG00000172985	-0.356105	3.80429e-09
ENSG00000173068	0.311836	1.19777e-12
ENSG00000173166	0.168393	1.3836e-07
ENSG00000173193	0.152687	4.84728e-05
ENSG00000173369	-0.103916	0.049286
ENSG00000173372	-0.103901	0.0147216
ENSG00000173391	0.391157	3.46735e-21
ENSG00000173436	-0.127854	0.00144587
ENSG00000173482	0.214554	3.65044e-09
ENSG00000173517	0.38944	3.22798e-23
ENSG00000173530	-0.159308	3.42699e-10
ENSG00000173821	0.160321	0.000151855
ENSG00000173905	0.14689	2.94281e-11
ENSG00000174123	-0.119931	4.20715e-13
ENSG00000174437	-0.107064	0.000529211
ENSG00000174469	-0.13831	0.00592076
ENSG00000174473	0.328759	5.18878e-16
ENSG00000175155	0.105908	7.68579e-05
ENSG00000175161	-0.125107	0.014488
ENSG00000175354	-0.216363	1.89872e-05
ENSG00000175471	0.3716	3.84294e-32
ENSG00000175899	0.140228	0.00149739
ENSG00000176204	-0.108626	0.00716291
ENSG00000176225	0.313424	6.09089e-10
ENSG00000176406	-0.105312	0.000137005
ENSG00000176597	-0.105845	0.00116116
ENSG00000176658	0.191874	1.68178e-17
ENSG00000176771	0.193591	0.000445235
ENSG00000177409	0.122585	5.69062e-06
ENSG00000177575	0.53596	6.86648e-15
ENSG00000177663	-0.124584	0.00282621
ENSG00000177694	0.13783	0.00804922
ENSG00000177706	0.126859	5.56734e-07
ENSG00000177707	-0.149817	4.92508e-18
ENSG00000177853	0.121768	1.17652e-05
ENSG00000177885	-0.153386	0.0012736
ENSG00000178177	0.169702	3.46424e-07
ENSG00000178764	0.114414	0.000127213
ENSG00000179915	-0.131688	0.00433335
ENSG00000180628	0.10368	1.04557e-05
ENSG00000180817	-0.181061	1.29089e-18
ENSG00000180891	0.118994	1.01434e-06
ENSG00000181381	0.155152	4.27503e-06
ENSG00000181467	0.103709	5.00488e-13
ENSG00000181481	0.105111	4.42969e-07
ENSG00000181722	0.229686	3.38232e-07
ENSG00000182132	-0.26244	2.13261e-06
ENSG00000182158	0.111538	6.55802e-05
ENSG00000182185	0.230901	2.40775e-06
ENSG00000182197	-0.208568	1.14505e-09
ENSG00000182372	0.134034	2.26203e-07
ENSG00000182389	-0.21894	6.52976e-08
ENSG00000182541	-0.196437	3.97589e-07
ENSG00000182578	-0.135177	0.000989235
ENSG00000182957	-0.144128	0.0223492
ENSG00000182985	0.463114	9.07385e-49
ENSG00000183020	0.125884	2.01121e-05
ENSG00000183049	0.110823	0.0203255
ENSG00000183117	-0.108048	0.0382562
ENSG00000183486	0.193841	4.12132e-14
ENSG00000183621	0.256954	8.25484e-17
ENSG00000184005	-0.878582	3.24161e-49
ENSG00000184014	0.126793	0.000133388
ENSG00000184060	0.129069	0.000186527
ENSG00000184156	0.171908	0.007859
ENSG00000184384	0.151745	0.00280562
ENSG00000184500	-0.143643	4.02576e-11
ENSG00000184588	0.27559	7.82573e-07
ENSG00000184903	0.198153	0.000248511
ENSG00000185215	0.20077	7.73696e-26
ENSG00000185436	0.13675	1.88597e-11
ENSG00000185477	0.190233	4.64332e-07
ENSG00000185650	-0.117164	0.0229911
ENSG00000185774	-0.152409	0.0331479
ENSG00000185989	0.109155	0.00123707
ENSG00000186063	-0.138097	3.8735e-05
ENSG00000186088	0.254937	2.60421e-16
ENSG00000186153	0.129285	0.0238021
ENSG00000186417	0.832125	8.16312e-38
ENSG00000186635	0.164609	2.44358e-09
ENSG00000186815	0.147909	8.51145e-08
ENSG00000187098	0.625549	1.95877e-56
ENSG00000187109	0.137937	6.43014e-07
ENSG00000187164	0.11457	0.011572
ENSG00000187474	0.269638	9.91242e-35
ENSG00000187672	-0.571434	1.16176e-35
ENSG00000187715	-0.110732	0.00162157
ENSG00000187764	-0.181314	1.27599e-10
ENSG00000188001	0.941701	2.34616e-66
ENSG00000188312	0.10645	0.0149696
ENSG00000188559	0.245746	1.11597e-09
ENSG00000188641	0.938369	4.9775e-38
ENSG00000188906	0.222482	4.20582e-08
ENSG00000189067	0.215158	1.67029e-14
ENSG00000189283	0.189068	0.000333791
ENSG00000196083	-0.286472	4.59253e-15
ENSG00000196141	0.213898	9.9218e-11
ENSG00000196284	0.117931	0.0130636
ENSG00000196369	-0.144188	0.00101091
ENSG00000196511	0.105189	0.0145708
ENSG00000196730	0.120812	1.18046e-14
ENSG00000196782	0.100989	0.0488662
ENSG00000196814	-0.198681	5.08892e-08
ENSG00000196975	0.108102	0.000403314
ENSG00000197081	0.123022	0.000400292
ENSG00000197381	0.218876	5.17008e-20
ENSG00000197405	0.101821	6.35415e-06
ENSG00000197520	-0.117591	0.000951909
ENSG00000197535	0.187956	5.45744e-09
ENSG00000197548	0.610061	2.25241e-50
ENSG00000197555	0.146387	0.00596127
ENSG00000197594	0.1203	4.85841e-10
ENSG00000197601	0.110893	0.000435863
ENSG00000197746	0.167772	1.48698e-05
ENSG00000197859	-0.10209	1.33398e-05
ENSG00000197965	-0.173857	1.39273e-06
ENSG00000197971	0.129329	0.000575062
ENSG00000198108	0.19018	0.000115229
ENSG00000198121	0.108578	0.0038849
ENSG00000198223	0.136739	0.00176114
ENSG00000198431	0.129796	1.33779e-06
ENSG00000198589	0.123574	0.00162157
ENSG00000198668	-0.182721	0.00168782
ENSG00000198879	0.419545	2.34119e-17
ENSG00000198964	0.133391	0.000725629
ENSG00000203747	-0.217032	1.41335e-10
ENSG00000204103	0.316547	8.02127e-28
ENSG00000204217	0.11616	0.00021122
ENSG00000204287	0.101197	0.0256362
ENSG00000204389	-0.362401	4.41095e-09
ENSG00000204634	-0.204162	7.87036e-06
ENSG00000205336	-0.291273	9.12258e-17
ENSG00000205726	0.214007	1.41276e-14
ENSG00000213047	0.167584	6.44814e-12
ENSG00000213614	0.121798	0.000798374
ENSG00000214787	0.107766	2.83359e-05
ENSG00000215114	0.154751	4.11893e-06
ENSG00000217128	0.15826	0.00469058
ENSG00000235162	-0.20448	9.12421e-15
ENSG00000244694	-0.199017	1.15287e-07
ENSG00000244754	0.135244	3.03341e-06
ENSG00000245848	0.17498	3.5637e-17
ENSG00000248905	0.407782	7.9774e-11
ENSG00000249437	-0.162156	0.000115229
ENSG00000257923	0.10588	0.0226716
ENSG00000258227	0.175627	2.42365e-11
ENSG00000260314	-0.101192	0.0110428
ENSG00000261371	0.155665	4.84641e-10
ENSG00000265972	0.110599	0.00407083
ENSG00000266028	-0.193603	8.59273e-06
ENSG00000266028,-0.193602770102981,8.59272941452732e-06

## Sheet: Inflammation vs HM
AD group				Normal group				PART group				Resilience group
ENSEMBL ID	log2FC	FDR		ENSEMBL ID	log2FC	FDR		ENSEMBL ID	log2FC	FDR		ENSEMBL ID	log2FC	FDR
ENSG00000000938	0.253676	0.0142172		ENSG00000001461	-0.212343	4.26285e-05		ENSG00000006459	-0.368234	0.00124518		ENSG00000000457	-0.159196	0.0153482
ENSG00000001084	-0.207874	4.10743e-09		ENSG00000001629	-0.332121	0.0399348		ENSG00000008086	-0.211111	0.0256352		ENSG00000002016	-0.229091	3.90716e-05
ENSG00000001461	-0.133913	0.0210066		ENSG00000005302	-0.159315	0.0063331		ENSG00000010295	-0.206093	0.011208		ENSG00000004455	-0.309135	1.49721e-10
ENSG00000003147	-0.177439	0.0210066		ENSG00000005436	-0.230647	2.27521e-05		ENSG00000012983	-0.374422	0.0431657		ENSG00000005007	-0.250874	3.46871e-05
ENSG00000003393	-0.126078	0.00948614		ENSG00000005810	-0.470605	0.0124223		ENSG00000014138	-0.16071	0.000645511		ENSG00000006744	-0.134015	6.2228e-09
ENSG00000003402	0.467629	0.00291702		ENSG00000008311	-0.164274	0.000210002		ENSG00000017427	-0.120015	0.0385571		ENSG00000009790	-0.299525	0.0277355
ENSG00000004799	-0.422379	0.00949611		ENSG00000009413	-0.354545	0.025529		ENSG00000023516	-0.292612	0.0365067		ENSG00000009844	-0.289464	0.0103768
ENSG00000006015	-0.141027	0.00821318		ENSG00000011405	-0.273023	0.0237349		ENSG00000023892	-0.264087	0.0427969		ENSG00000011295	-0.435498	1.32651e-05
ENSG00000006576	-0.257648	0.0231014		ENSG00000014123	-0.191288	0.0484066		ENSG00000029364	-0.236992	3.97325e-05		ENSG00000013503	-0.175717	0.0277355
ENSG00000007341	-0.176674	0.0244444		ENSG00000018510	-0.324094	0.0186332		ENSG00000030066	-0.336329	0.00410708		ENSG00000022277	-0.350668	0.00313209
ENSG00000007923	-0.146096	0.0228966		ENSG00000020922	-0.240733	0.000749265		ENSG00000035928	-0.28627	8.00779e-05		ENSG00000027001	-0.236459	0.00946731
ENSG00000008441	-0.133113	0.00620279		ENSG00000023734	-0.13939	0.0397007		ENSG00000042753	-0.178063	0.00933892		ENSG00000032742	-0.185774	0.00222267
ENSG00000008710	-0.139305	0.0241362		ENSG00000032742	-0.179543	0.0026544		ENSG00000048405	-0.34116	0.0103701		ENSG00000036054	-0.359727	0.000113921
ENSG00000008869	-0.321705	0.0118153		ENSG00000033170	-0.459499	0.0125967		ENSG00000049656	-0.14774	0.0256868		ENSG00000042317	-0.221412	1.25715e-09
ENSG00000008952	-0.202928	0.0160202		ENSG00000042832	-0.158376	0.0397007		ENSG00000054690	-0.129404	0.0485666		ENSG00000042980	-0.995906	0.003464
ENSG00000009790	-0.192982	0.0293135		ENSG00000046653	-0.243841	0.0331718		ENSG00000058453	-0.235151	4.6287e-05		ENSG00000044446	-0.166111	3.57015e-07
ENSG00000009844	-0.16868	0.0363952		ENSG00000047315	-0.245467	0.0123964		ENSG00000066557	-0.141744	0.0465674		ENSG00000048740	-0.61236	0.045573
ENSG00000009950	-0.258666	0.016661		ENSG00000048052	-0.908336	0.00289585		ENSG00000067369	-0.214993	0.0135056		ENSG00000049860	-0.40854	4.34975e-40
ENSG00000010295	-0.113155	0.0430111		ENSG00000048828	-0.397353	0.0151959		ENSG00000069424	-0.170842	0.0140256		ENSG00000050030	-0.253892	6.44444e-08
ENSG00000010404	-0.352031	0.00683018		ENSG00000063601	-0.185768	0.0390401		ENSG00000070047	-0.13392	0.0262192		ENSG00000051108	-0.49776	0.00489876
ENSG00000010818	0.377083	0.0297626		ENSG00000064225	-0.368087	0.010075		ENSG00000071655	-0.140236	0.0200816		ENSG00000059122	-0.140784	5.07256e-10
ENSG00000011021	-0.162147	0.00856282		ENSG00000064651	-0.168592	0.00087023		ENSG00000074266	-0.248985	0.00337438		ENSG00000059573	-0.174132	3.15787e-07
ENSG00000011028	-0.180032	0.0280047		ENSG00000064726	-0.34604	0.00222859		ENSG00000078668	-0.189611	0.0267045		ENSG00000059588	-0.295647	0.00276924
ENSG00000011260	-0.176854	0.0097612		ENSG00000065665	-0.163337	0.000364461		ENSG00000083828	-0.189551	0.0112825		ENSG00000060558	-0.225642	1.55438e-16
ENSG00000011275	-0.273978	0.0280047		ENSG00000066294	-0.288313	0.0360168		ENSG00000084764	-0.173726	0.0376001		ENSG00000063854	-0.233784	2.12369e-17
ENSG00000011376	-0.195507	0.00742012		ENSG00000066629	-0.227373	0.0281081		ENSG00000086300	-0.220164	0.0298635		ENSG00000064995	-0.190199	0.00123705
ENSG00000011422	0.351882	0.00710282		ENSG00000067704	-0.189106	0.000385468		ENSG00000089154	-0.171412	0.00528011		ENSG00000065154	-0.18212	0.0415505
ENSG00000011485	-0.101816	0.0458091		ENSG00000068724	-0.539376	0.0290181		ENSG00000089775	-0.200466	0.00855708		ENSG00000065609	-0.198043	0.00767384
ENSG00000012061	-0.136444	0.0308045		ENSG00000070081	-0.109402	0.0320854		ENSG00000090530	-0.427663	0.0194066		ENSG00000065923	-0.13429	6.71931e-06
ENSG00000012232	-0.111651	0.018709		ENSG00000070413	-0.213174	0.0307528		ENSG00000091409	-0.184833	0.0105594		ENSG00000066739	-0.251657	0.0195191
ENSG00000012983	-0.257419	0.0260725		ENSG00000072401	-0.123497	0.0353286		ENSG00000094916	-0.276579	0.00139856		ENSG00000068028	-0.260371	0.0277638
ENSG00000014641	-0.179935	0.0025692		ENSG00000073849	-0.480982	0.0351535		ENSG00000095139	-0.221009	1.73462e-12		ENSG00000068383	-0.124374	4.66501e-07
ENSG00000014824	-0.181363	0.0436648		ENSG00000074054	-0.371774	0.0222258		ENSG00000095319	-0.139423	8.73213e-06		ENSG00000068796	-0.412192	0.0157004
ENSG00000015475	0.258822	0.0307078		ENSG00000074590	-0.443926	0.00249348		ENSG00000097033	-0.327156	0.000574905		ENSG00000069329	-0.380443	0.0301264
ENSG00000015676	-0.259037	0.00849807		ENSG00000074706	-0.691047	0.012375		ENSG00000099308	-0.421728	8.51351e-06		ENSG00000069493	-0.357065	0.000393868
ENSG00000017427	-0.111056	0.0177937		ENSG00000075303	-0.183093	1.42928e-05		ENSG00000099954	-0.213907	0.00185844		ENSG00000070081	-0.166552	0.000825521
ENSG00000020922	-0.159659	0.039376		ENSG00000075391	-0.494737	0.028137		ENSG00000100592	-0.349568	0.00951844		ENSG00000070444	-0.140912	0.0489388
ENSG00000021574	-0.159367	0.0360489		ENSG00000076770	-0.228732	0.00531423		ENSG00000101413	-0.231681	4.6287e-05		ENSG00000070476	-0.542676	0.0104001
ENSG00000021645	-0.307876	0.0136256		ENSG00000077254	-0.35695	0.00602611		ENSG00000103126	-0.149123	0.000472029		ENSG00000070814	-0.219229	9.6354e-11
ENSG00000022840	-0.17059	0.0182065		ENSG00000078668	-0.166022	0.00301207		ENSG00000103381	-0.380498	2.51574e-05		ENSG00000071655	-0.197241	4.5516e-11
ENSG00000023171	-0.270643	0.0258952		ENSG00000078902	-0.133183	0.0159193		ENSG00000103423	-0.179162	0.00297258		ENSG00000071967	-0.3119	0.00213958
ENSG00000023697	-0.235725	0.00658093		ENSG00000079156	-0.279675	0.0203854		ENSG00000103550	-0.180783	0.021241		ENSG00000072849	-0.1934	1.82386e-07
ENSG00000023892	-0.213201	0.0108516		ENSG00000079387	-0.140929	0.0467489		ENSG00000103994	-0.446161	0.0101771		ENSG00000072958	-0.207966	4.56103e-09
ENSG00000025708	0.294531	0.0268006		ENSG00000079482	-0.236272	0.0391845		ENSG00000104529	-0.328393	0.00132461		ENSG00000073060	-0.439708	0.0220097
ENSG00000026297	-0.558298	0.02824		ENSG00000079691	-0.368566	0.0239669		ENSG00000104687	-0.242346	0.000895264		ENSG00000074319	-0.288842	0.0121063
ENSG00000027697	-0.345687	0.0181134		ENSG00000079841	-0.178884	0.00139417		ENSG00000104756	-0.116017	0.0485666		ENSG00000074603	-0.417444	0.0139811
ENSG00000030419	-0.312991	0.0199906		ENSG00000079950	-0.530922	0.00323493		ENSG00000104980	-0.10746	0.0267045		ENSG00000074706	-1.18004	0.0245808
ENSG00000031081	0.480338	0.0215447		ENSG00000080503	-0.641173	0.000505125		ENSG00000106034	-0.595639	0.0365138		ENSG00000075914	-0.194951	1.04517e-10
ENSG00000032444	-0.174933	0.00146041		ENSG00000080603	-0.125853	0.0418459		ENSG00000106479	-0.213169	0.021241		ENSG00000076984	-0.195131	0.0135675
ENSG00000033170	-0.243355	0.0435397		ENSG00000081019	-0.222633	0.00701077		ENSG00000106692	-0.197597	0.0163405		ENSG00000077063	-0.927553	0.014187
ENSG00000033867	-0.514363	0.00186804		ENSG00000083520	-0.14445	0.0342157		ENSG00000106771	-0.283305	0.0264689		ENSG00000077157	-0.49399	0.00621041
ENSG00000035928	-0.218142	0.000971226		ENSG00000083828	-0.150688	0.0207351		ENSG00000107719	-0.595412	0.0139361		ENSG00000077713	-0.190986	0.0227248
ENSG00000036054	-0.155214	0.0495385		ENSG00000087253	-0.570564	0.00211782		ENSG00000107957	-0.190245	0.000895264		ENSG00000078114	-0.208597	0.0144669
ENSG00000038219	-0.235182	0.0250179		ENSG00000087448	-0.140256	0.0224318		ENSG00000107960	-0.113582	0.0101771		ENSG00000080200	-0.27599	0.0216382
ENSG00000040933	-0.266385	0.0485147		ENSG00000087502	-0.169997	0.008331		ENSG00000109436	-0.381001	0.022947		ENSG00000080224	-0.200525	4.68746e-08
ENSG00000042980	-0.33447	0.0417267		ENSG00000088035	-0.140566	4.36676e-07		ENSG00000109906	-0.497184	0.0407773		ENSG00000082213	-0.173183	2.577e-13
ENSG00000044574	-0.253104	0.0385066		ENSG00000088247	-0.109762	0.0390824		ENSG00000110031	-0.229908	0.00410708		ENSG00000083067	-0.179462	2.75895e-13
ENSG00000046653	-0.211682	0.00877439		ENSG00000088298	-0.145179	0.0290181		ENSG00000111145	-0.289113	0.0485666		ENSG00000083642	-0.605602	0.000337651
ENSG00000047056	-0.237819	0.0379027		ENSG00000088808	-0.199361	0.00301207		ENSG00000111348	-0.246109	0.0430754		ENSG00000084463	-0.218033	4.1881e-06
ENSG00000047648	-0.493876	0.000670159		ENSG00000089053	-0.269966	0.024217		ENSG00000111652	-0.117374	0.0403807		ENSG00000084754	-0.343118	0.00222267
ENSG00000048052	-0.690288	0.000371602		ENSG00000089063	-0.158035	0.0429461		ENSG00000111666	-0.333268	0.00637602		ENSG00000084764	-0.286134	0.0211143
ENSG00000048405	-0.189913	0.0455437		ENSG00000089220	-0.322931	0.0354437		ENSG00000111707	-0.12942	0.00410708		ENSG00000085382	-0.445297	0.000682812
ENSG00000048740	-0.504576	0.00243671		ENSG00000090530	-0.372002	0.0310308		ENSG00000112149	1.44704	0.000698921		ENSG00000085491	-0.206327	2.41903e-11
ENSG00000048991	-0.379316	0.00138203		ENSG00000091428	-0.200166	0.033817		ENSG00000114062	-0.429371	0.00410708		ENSG00000085832	-0.691916	0.0144042
ENSG00000050130	-0.165182	0.00146041		ENSG00000092931	-0.325555	0.000195982		ENSG00000114126	-0.24398	0.0275918		ENSG00000085871	-0.575889	8.3933e-09
ENSG00000050165	-0.161219	0.0203981		ENSG00000093144	-0.335238	0.00070423		ENSG00000115241	-0.191115	0.0298635		ENSG00000086065	-0.253262	1.01097e-08
ENSG00000050748	-0.153637	0.0398609		ENSG00000095002	-0.170185	0.000741601		ENSG00000115368	-0.176538	0.0379843		ENSG00000087088	-0.276809	4.34528e-07
ENSG00000051108	-0.264574	0.0476275		ENSG00000095585	-0.526883	0.0151959		ENSG00000116199	-0.211602	0.00117352		ENSG00000087157	-0.430489	0.00191519
ENSG00000052126	-0.248736	0.0282868		ENSG00000096093	-0.116613	0.0132931		ENSG00000117118	-0.232228	0.00240929		ENSG00000087338	-0.152898	0.0474524
ENSG00000053524	-0.210442	0.0424205		ENSG00000096746	-0.251221	0.0460525		ENSG00000117360	-0.135502	0.0368388		ENSG00000087884	-0.158904	5.19835e-12
ENSG00000053770	-0.202692	5.66387e-07		ENSG00000099622	-0.254198	0.0287726		ENSG00000117533	-0.126628	0.0366386		ENSG00000088179	-0.315374	0.00455845
ENSG00000054282	-0.327242	0.0419158		ENSG00000099954	-0.324704	9.19163e-05		ENSG00000117676	-0.346135	0.0329147		ENSG00000089006	0.544089	0.0305656
ENSG00000054523	-0.19908	0.0314663		ENSG00000100227	-0.116577	0.00322382		ENSG00000118197	-0.171877	5.52849e-10		ENSG00000089335	-0.184127	1.1767e-09
ENSG00000055163	-0.11113	0.00822058		ENSG00000100311	0.595547	0.028137		ENSG00000118495	-0.514112	3.78735e-05		ENSG00000089737	-0.286556	0.0239189
ENSG00000055332	-0.24054	0.0144037		ENSG00000100416	-0.107128	0.0360168		ENSG00000120798	-0.204552	0.0267045		ENSG00000089818	-0.204422	8.99057e-09
ENSG00000057252	-0.267733	0.0230513		ENSG00000100567	-0.184198	0.0211069		ENSG00000122550	-0.161356	0.00125369		ENSG00000090905	-0.580618	0.00590532
ENSG00000057704	-0.319325	0.0072661		ENSG00000100596	-0.555584	0.00342019		ENSG00000122862	1.0982	0.0267045		ENSG00000092820	-0.266843	9.5848e-05
ENSG00000058866	-0.119283	0.0322734		ENSG00000100601	-0.197198	0.000221829		ENSG00000124193	-0.186841	0.0482668		ENSG00000095002	-0.15688	0.0165767
ENSG00000059691	-0.11925	0.00841967		ENSG00000100605	-0.236996	0.0440021		ENSG00000124370	-0.149345	0.00200964		ENSG00000095319	-0.177349	1.7917e-09
ENSG00000059804	0.643164	0.00715206		ENSG00000100722	-0.261382	0.0157332		ENSG00000125485	-0.186901	0.00117352		ENSG00000099282	-0.210218	0.00810463
ENSG00000061676	-0.126822	0.0103842		ENSG00000100804	-0.116819	0.0107721		ENSG00000125741	-0.11024	0.0234848		ENSG00000099331	-0.570993	0.0489388
ENSG00000061794	-0.141646	0.00191305		ENSG00000100906	0.563242	0.00701077		ENSG00000125871	-0.163053	0.00904204		ENSG00000099385	-0.171862	4.44771e-05
ENSG00000061938	-0.237793	0.000967974		ENSG00000101181	-0.172964	0.0203854		ENSG00000126214	-0.476032	0.0362172		ENSG00000099940	-0.20378	6.23098e-10
ENSG00000062194	0.27064	0.0361972		ENSG00000101247	-0.234456	0.0149381		ENSG00000126267	-0.199309	0.00200964		ENSG00000099942	-0.17276	0.00643862
ENSG00000062598	-0.115782	0.0112278		ENSG00000101407	-0.168855	0.0274484		ENSG00000126934	-0.183649	0.0027135		ENSG00000100084	-0.132511	1.12047e-09
ENSG00000064012	-0.182621	0.00623989		ENSG00000101474	-0.35367	0.0124687		ENSG00000128050	-0.129365	0.0194066		ENSG00000100412	-0.309804	0.036017
ENSG00000064115	-0.287004	0.00178528		ENSG00000101577	-0.395007	0.0242312		ENSG00000128604	-0.214884	6.01331e-07		ENSG00000100580	-0.487056	0.0176183
ENSG00000064225	-0.405085	0.000505633		ENSG00000101974	-0.503144	0.00521062		ENSG00000130304	-0.186715	0.0196335		ENSG00000100592	-0.418793	0.0294265
ENSG00000064933	-0.358594	7.87109e-05		ENSG00000102445	-0.43232	0.0320854		ENSG00000130560	-0.173561	0.021241		ENSG00000100599	-0.679739	0.035179
ENSG00000065000	-0.136437	0.0488877		ENSG00000102531	-0.455347	0.00701077		ENSG00000130699	-0.244195	0.00042327		ENSG00000100890	-0.213712	0.00294428
ENSG00000065243	-0.367981	0.00537531		ENSG00000103066	-0.217883	0.00165686		ENSG00000130770	-0.202948	0.00410708		ENSG00000101150	-0.241613	0.0322552
ENSG00000065413	-0.326003	0.0260725		ENSG00000103126	-0.104993	0.0212376		ENSG00000130935	-0.133078	0.00199291		ENSG00000101161	-0.161043	0.00705303
ENSG00000065491	-0.131764	0.0309104		ENSG00000103365	-0.31041	0.0307528		ENSG00000131408	-0.2302	2.58335e-08		ENSG00000101391	-0.270097	4.12129e-12
ENSG00000065882	-0.338592	0.0142172		ENSG00000103479	-0.303259	0.00223119		ENSG00000131773	-0.688339	0.00831949		ENSG00000101464	-0.189344	0.00850152
ENSG00000066084	-0.324039	0.0364514		ENSG00000104205	-0.432048	0.028137		ENSG00000132640	-0.183214	3.51305e-07		ENSG00000101493	-0.358449	0.014187
ENSG00000066629	-0.168701	0.0400168		ENSG00000104299	-0.211572	0.0227739		ENSG00000133246	-0.434205	0.0206664		ENSG00000101974	-0.720425	8.80101e-05
ENSG00000066651	-0.2009	0.0386136		ENSG00000104408	-0.251198	0.048627		ENSG00000135205	-0.302618	0.0410367		ENSG00000102043	-0.214865	4.58007e-12
ENSG00000066739	-0.143574	0.0448574		ENSG00000104442	-0.124981	0.0375508		ENSG00000135317	-0.342758	0.0265445		ENSG00000102466	-0.361511	0.0239841
ENSG00000066933	-0.194103	0.0468304		ENSG00000104660	-0.156712	0.0450628		ENSG00000135537	-0.198127	0.0207793		ENSG00000102763	-0.399275	0.0154122
ENSG00000067057	-0.173571	0.00490155		ENSG00000105246	0.512625	0.0287726		ENSG00000135749	-0.552651	0.0394572		ENSG00000102984	-0.163285	4.55847e-14
ENSG00000067715	-0.387107	0.00700168		ENSG00000105383	-0.151121	0.0101852		ENSG00000136104	-0.317906	0.00730237		ENSG00000103024	-0.362285	3.09307e-10
ENSG00000067798	-0.530881	0.0139626		ENSG00000105607	-0.132603	0.000897321		ENSG00000136144	-0.212487	0.0193085		ENSG00000103423	-0.162781	0.0217008
ENSG00000067992	-0.180347	0.0488877		ENSG00000105793	-0.243978	0.000538479		ENSG00000136193	-0.234491	0.0103701		ENSG00000104361	-0.314499	0.00414868
ENSG00000068028	-0.186391	0.00188009		ENSG00000105835	0.792821	0.00606592		ENSG00000136261	-0.154583	0.00476071		ENSG00000104613	-0.634465	0.00101464
ENSG00000068097	-0.112529	0.0122549		ENSG00000105851	-0.206526	0.0459528		ENSG00000136404	-0.449512	0.00016195		ENSG00000104626	-0.220175	0.00621041
ENSG00000069275	-0.354837	1.83522e-05		ENSG00000106034	-0.575427	0.00161736		ENSG00000136699	-0.183527	3.97325e-05		ENSG00000104660	-0.304787	9.31308e-08
ENSG00000069493	-0.309597	0.000474925		ENSG00000106665	-0.341931	0.0149381		ENSG00000136720	-0.207347	0.0374193		ENSG00000105053	-0.189423	2.93185e-15
ENSG00000070214	-0.198078	0.0323208		ENSG00000106772	-0.137533	0.0112775		ENSG00000138439	-0.243386	0.000774964		ENSG00000105127	-0.224684	9.37103e-12
ENSG00000070413	-0.157604	0.0244629		ENSG00000106780	-0.230743	0.044075		ENSG00000138443	-0.399357	0.00528329		ENSG00000105383	-0.179016	3.06858e-08
ENSG00000070476	-0.2785	0.00243671		ENSG00000106829	-0.393127	0.0354772		ENSG00000138709	-0.26541	0.00265456		ENSG00000105711	-0.367465	0.00678002
ENSG00000070808	-0.167684	0.0296496		ENSG00000107242	-0.453788	9.19163e-05		ENSG00000139364	-0.168262	0.00988262		ENSG00000105778	-0.645651	0.00110794
ENSG00000070961	-0.326516	0.0203981		ENSG00000107282	-0.417795	0.00933628		ENSG00000141655	-0.125304	0.0113868		ENSG00000105856	-0.35588	6.33797e-09
ENSG00000071189	-0.319721	0.0237054		ENSG00000107518	-0.326401	0.0237349		ENSG00000141837	-0.555166	0.021241		ENSG00000105866	-0.212212	5.89303e-11
ENSG00000071242	-0.379942	0.0431488		ENSG00000107719	-0.574177	0.028137		ENSG00000142192	-0.420158	0.0135056		ENSG00000105889	-0.399645	0.00123636
ENSG00000071794	-0.183424	0.00168919		ENSG00000107738	-0.482922	0.00222859		ENSG00000142609	-0.17318	0.00484702		ENSG00000105928	-0.210384	1.10038e-10
ENSG00000072274	0.323991	0.0322811		ENSG00000108389	-0.182365	0.034929		ENSG00000143252	-0.227395	0.037222		ENSG00000106066	-0.600261	0.0391601
ENSG00000072518	-0.222858	0.0305371		ENSG00000108474	-0.277898	0.000566031		ENSG00000143457	-0.209276	0.000411867		ENSG00000106609	-0.272309	0.0217807
ENSG00000073849	-0.468079	0.0204446		ENSG00000109320	0.716496	0.0316247		ENSG00000143499	-0.174547	2.72107e-05		ENSG00000106771	-0.41854	0.0139811
ENSG00000073969	-0.262854	0.0188381		ENSG00000109794	-0.455541	0.0396707		ENSG00000144118	-0.180608	0.0315998		ENSG00000107362	-0.221602	0.00414868
ENSG00000074201	-0.149813	0.0378077		ENSG00000109906	-0.44846	0.028137		ENSG00000144468	-0.390493	0.00369388		ENSG00000107669	-0.428095	0.015557
ENSG00000074416	-0.249126	0.00189007		ENSG00000110031	-0.251801	0.00710078		ENSG00000144504	-0.33074	0.0485666		ENSG00000107902	-0.22672	5.91198e-18
ENSG00000074590	-0.302119	0.00619907		ENSG00000110090	-0.113842	0.0441121		ENSG00000145088	-0.260999	0.0394572		ENSG00000108506	-0.195714	4.85231e-06
ENSG00000074695	-0.206623	0.000405021		ENSG00000110315	-0.14245	0.013454		ENSG00000145335	-0.560093	0.00274573		ENSG00000109180	-0.387482	0.00935518
ENSG00000074696	-0.183948	4.58825e-05		ENSG00000110934	-0.280676	0.0418459		ENSG00000145390	-0.71304	0.00348387		ENSG00000109452	-0.200255	0.014022
ENSG00000074706	-0.47762	0.0230975		ENSG00000110955	-0.164759	0.0335394		ENSG00000145685	-0.762527	0.0152276		ENSG00000109689	-0.368808	0.0339408
ENSG00000075914	-0.139889	0.00272271		ENSG00000111144	-0.162746	6.15427e-05		ENSG00000145982	-0.473224	0.0348378		ENSG00000109775	-0.146566	1.94092e-10
ENSG00000077063	-0.481922	0.000935359		ENSG00000111224	-0.197237	0.00559182		ENSG00000147364	-0.145038	0.00117352		ENSG00000110107	-0.230545	7.57105e-10
ENSG00000077235	-0.13986	0.00192964		ENSG00000111300	-0.269058	0.0399348		ENSG00000148450	-0.139	0.0407773		ENSG00000110925	-0.123982	7.20825e-09
ENSG00000077420	-0.533552	0.00428562		ENSG00000111615	-0.151299	0.00435702		ENSG00000148719	-0.110837	0.0285141		ENSG00000110934	-0.526012	0.000756454
ENSG00000078018	-0.422178	4.37717e-06		ENSG00000111666	-0.315147	0.0026544		ENSG00000148834	-0.130121	0.0207793		ENSG00000111540	-0.187309	0.030042
ENSG00000078237	-0.190333	0.0402537		ENSG00000111877	-0.279163	0.0361788		ENSG00000149970	-0.210126	0.00724642		ENSG00000111802	-0.157062	1.04163e-07
ENSG00000078687	-0.181412	0.0430111		ENSG00000112149	1.58289	2.27521e-05		ENSG00000150681	-0.183769	0.046174		ENSG00000112038	-0.403208	6.71268e-07
ENSG00000079387	-0.141256	0.00503464		ENSG00000112159	-0.253864	0.0327101		ENSG00000150712	-0.212047	0.000308592		ENSG00000112343	-0.482574	0.0278622
ENSG00000079459	-0.163931	0.00888106		ENSG00000112200	-0.336047	0.0151959		ENSG00000150907	-0.364239	0.00497155		ENSG00000112592	-0.124828	1.48085e-08
ENSG00000079950	-0.461133	0.000684851		ENSG00000112414	-0.110204	0.0235064		ENSG00000151233	-0.17678	0.0258244		ENSG00000112695	-0.294354	4.85231e-06
ENSG00000080298	-0.398073	0.00407221		ENSG00000112425	-0.262264	2.06946e-08		ENSG00000151461	-0.442998	0.000149082		ENSG00000112699	-0.858776	0.000573223
ENSG00000080503	-0.366506	0.00583842		ENSG00000112624	-0.322116	0.0423932		ENSG00000151466	-0.45172	0.0275918		ENSG00000113312	-0.298175	0.00708135
ENSG00000080608	-0.236077	0.0308674		ENSG00000113068	-0.160793	0.0459204		ENSG00000152359	-0.183222	0.0152276		ENSG00000113448	-0.604356	0.000199003
ENSG00000080815	0.258403	0.0495759		ENSG00000113441	-0.354151	0.0281081		ENSG00000152518	-0.742862	0.000149082		ENSG00000113522	-0.232583	0.0329589
ENSG00000080839	-0.11337	0.028779		ENSG00000113658	-0.285719	0.0020003		ENSG00000153561	-0.18683	0.00484702		ENSG00000113810	-0.109236	7.85325e-08
ENSG00000081014	-0.190198	0.00564589		ENSG00000113761	-0.171756	0.00642227		ENSG00000154122	-0.351009	0.000289792		ENSG00000113851	-0.25029	0.0333651
ENSG00000081026	-0.25082	0.0292151		ENSG00000114013	-0.499743	0.010075		ENSG00000154429	-0.131231	0.0376001		ENSG00000114279	-0.348322	0.0241052
ENSG00000081189	-0.374885	0.0196818		ENSG00000114054	-0.19037	3.95344e-05		ENSG00000154889	-0.202229	0.00420035		ENSG00000114491	-0.139079	1.27405e-08
ENSG00000081320	-0.153731	0.00595825		ENSG00000114126	-0.249936	0.00307943		ENSG00000155463	-0.127068	8.00779e-05		ENSG00000114796	-0.40005	0.0249281
ENSG00000082996	-0.323574	0.027967		ENSG00000115183	-0.36801	0.0259308		ENSG00000157741	-0.261974	0.0376001		ENSG00000114841	-0.202621	4.23089e-44
ENSG00000083099	-0.100827	0.035937		ENSG00000115827	-0.176722	0.00405669		ENSG00000158623	-0.234396	0.0152276		ENSG00000116095	-0.228541	4.73702e-22
ENSG00000083123	-0.26385	0.00620279		ENSG00000115944	-0.140407	0.029988		ENSG00000158813	-0.459751	0.0219964		ENSG00000116209	-0.403477	5.61023e-23
ENSG00000083223	-0.229227	0.0276514		ENSG00000115947	-0.270126	0.0162817		ENSG00000159314	-0.284921	0.00422705		ENSG00000116678	-0.288083	0.000532116
ENSG00000083535	-0.341532	0.00552712		ENSG00000115956	1.13717	0.000875008		ENSG00000159733	-0.129131	0.0376001		ENSG00000116704	-0.169026	6.10533e-06
ENSG00000083544	-0.2341	0.0348517		ENSG00000116062	-0.129131	0.0206192		ENSG00000160299	-0.175022	0.0234268		ENSG00000117410	-0.361829	0.0323716
ENSG00000084731	-0.148247	0.0379027		ENSG00000116793	-0.154997	0.00933628		ENSG00000160460	-0.186983	0.00528011		ENSG00000117620	-0.152312	0.000528934
ENSG00000084764	-0.110377	0.0164126		ENSG00000117114	-0.1477	0.0112226		ENSG00000161929	-0.116684	0.0385571		ENSG00000117632	-0.40819	0.000118362
ENSG00000085511	-0.195679	0.0458857		ENSG00000117154	-0.628506	0.00978202		ENSG00000162542	-0.222812	0.000895264		ENSG00000118058	-0.551063	0.00429066
ENSG00000085662	-0.148736	0.00930046		ENSG00000117410	-0.18305	0.0417716		ENSG00000162688	-0.185847	0.000290057		ENSG00000118420	-0.507054	8.1842e-20
ENSG00000085832	-0.373479	0.0155553		ENSG00000117505	-0.205683	0.012375		ENSG00000163106	-0.299303	0.00125369		ENSG00000118454	-0.392627	0.00538831
ENSG00000085871	-0.230635	0.0460458		ENSG00000117899	-0.159291	0.0297375		ENSG00000163349	-0.237219	0.0187679		ENSG00000118961	-0.30716	0.0349415
ENSG00000086062	0.693312	0.000171485		ENSG00000118363	-0.20072	0.0494566		ENSG00000163406	-0.342523	0.0183507		ENSG00000118971	-0.413898	0.0030322
ENSG00000087253	-0.438675	0.00577568		ENSG00000118482	-0.324204	0.0287726		ENSG00000163683	-0.268199	0.00373073		ENSG00000119335	-0.259695	0.0169979
ENSG00000088179	-0.205775	0.0165236		ENSG00000118503	0.826291	0.00662548		ENSG00000163866	-0.136128	0.0128063		ENSG00000119596	-0.501803	1.89638e-07
ENSG00000088298	-0.109272	0.0349043		ENSG00000118507	-0.250988	0.0438284		ENSG00000164080	-0.202975	0.0397056		ENSG00000119684	-0.208834	0.000153126
ENSG00000089006	-0.151973	0.0448243		ENSG00000118855	-0.411478	0.00217813		ENSG00000164347	-0.147172	0.00951844		ENSG00000119705	-0.375577	4.0676e-07
ENSG00000089053	-0.190946	0.0250179		ENSG00000118900	-0.174697	0.00824704		ENSG00000164463	-0.324447	0.0234268		ENSG00000119950	-0.20576	5.33879e-05
ENSG00000089060	-0.1477	0.0352294		ENSG00000118961	-0.264048	0.0287726		ENSG00000164466	-0.186584	0.0378095		ENSG00000120265	-0.311821	0.00236713
ENSG00000089063	-0.125518	0.0200606		ENSG00000119335	-0.196345	0.0118043		ENSG00000165417	-0.246321	0.00860306		ENSG00000120519	-0.513165	0.00469283
ENSG00000089094	-0.251762	0.0116024		ENSG00000119383	-0.177009	0.00531423		ENSG00000165671	-0.506468	0.029828		ENSG00000120784	-0.133307	0.0427271
ENSG00000089123	-0.220351	0.00437399		ENSG00000119720	-0.136499	0.0361015		ENSG00000166035	-0.184364	0.00369388		ENSG00000121671	-0.163454	0.0128425
ENSG00000090530	-0.307341	0.0210066		ENSG00000119900	-0.427667	0.0312567		ENSG00000166579	-0.234381	0.00160568		ENSG00000121933	-0.340823	0.0306322
ENSG00000091073	0.192939	0.0420643		ENSG00000119912	-0.282532	0.00223119		ENSG00000167005	-0.229086	3.00245e-13		ENSG00000122068	-0.220925	0.0383599
ENSG00000091157	-0.292993	0.0160384		ENSG00000120162	-0.272448	0.0142654		ENSG00000167196	-0.203891	0.0499091		ENSG00000122376	-0.482763	1.01371e-20
ENSG00000092140	-0.182485	0.00559171		ENSG00000120675	-0.264408	0.0179737		ENSG00000167216	-0.14682	0.00410708		ENSG00000122512	-0.172657	3.19458e-12
ENSG00000092148	-0.238607	0.0314401		ENSG00000120685	-0.137901	0.000702135		ENSG00000167232	-0.306558	0.0248793		ENSG00000122574	-0.177111	3.87842e-07
ENSG00000092203	-0.12638	0.00537531		ENSG00000120727	-0.203859	0.0146961		ENSG00000167601	-0.35868	0.0194066		ENSG00000122707	-0.581809	8.96165e-07
ENSG00000095015	-0.271837	0.0364514		ENSG00000121486	-0.154262	0.012375		ENSG00000167994	-0.194298	9.77058e-06		ENSG00000122729	-0.19659	2.82909e-25
ENSG00000095485	-0.197218	2.97973e-08		ENSG00000121858	-0.286482	3.21811e-07		ENSG00000168090	-0.171694	0.000597126		ENSG00000122966	-0.202643	0.0281108
ENSG00000095585	-0.55142	8.15817e-05		ENSG00000122033	-0.181991	0.0247593		ENSG00000168421	-0.24736	0.0499091		ENSG00000123360	-0.174375	0.0167579
ENSG00000095951	0.488484	0.000634285		ENSG00000122122	-0.201525	0.0210499		ENSG00000168827	-0.211016	0.0376001		ENSG00000123384	-0.495253	0.0454209
ENSG00000096872	-0.134115	0.00136567		ENSG00000122126	-0.167798	0.0200415		ENSG00000168917	-0.177493	0.016352		ENSG00000123643	-0.25286	1.04517e-10
ENSG00000099246	-0.197075	0.00288543		ENSG00000122507	-0.405751	0.0146961		ENSG00000168994	-0.13426	0.0369792		ENSG00000123685	-0.188568	0.0112546
ENSG00000099250	-0.274992	0.0303344		ENSG00000122643	-0.230541	0.0131945		ENSG00000169032	-0.475816	0.0135056		ENSG00000123983	-0.442349	0.0209449
ENSG00000099282	-0.165949	0.00322437		ENSG00000122862	0.953236	0.00349663		ENSG00000169249	-0.177979	0.0436504		ENSG00000124126	-1.1409	0.000701899
ENSG00000099308	-0.169106	0.0299413		ENSG00000122966	-0.117647	0.000267533		ENSG00000169251	-0.186945	0.0330953		ENSG00000124370	-0.140531	1.41815e-08
ENSG00000099337	-0.161513	0.0283101		ENSG00000123106	-0.432165	0.038278		ENSG00000169313	-0.822077	1.89432e-05		ENSG00000124571	-0.323134	0.00959578
ENSG00000099622	-0.207972	0.0211786		ENSG00000123119	-0.208433	0.0272172		ENSG00000169570	-0.234601	0.000712006		ENSG00000124587	-0.251254	1.65716e-17
ENSG00000099624	-0.109208	0.0218783		ENSG00000123143	-0.188318	0.033817		ENSG00000169855	-0.224001	0.00476071		ENSG00000125037	-0.221651	2.1897e-10
ENSG00000099783	-0.220888	0.0436648		ENSG00000123472	-0.160019	0.0106336		ENSG00000170296	-0.188118	0.0275918		ENSG00000125124	-0.161398	3.22339e-08
ENSG00000099810	-0.374216	0.000810508		ENSG00000123933	-0.224765	0.012181		ENSG00000170348	-0.338344	0.00781857		ENSG00000125503	-0.299083	0.00207528
ENSG00000100083	-0.146748	0.0259109		ENSG00000123983	-0.331114	0.0310474		ENSG00000170390	-0.164394	0.0477854		ENSG00000125834	-0.16219	1.70901e-05
ENSG00000100099	-0.138788	0.0213597		ENSG00000124406	-0.24359	0.0121043		ENSG00000170456	-0.218991	0.0485666		ENSG00000126001	-0.188661	6.33657e-13
ENSG00000100201	-0.330846	0.00776309		ENSG00000124532	-0.148847	0.0044403		ENSG00000171045	-0.217957	5.93506e-11		ENSG00000126016	-0.231321	0.00442239
ENSG00000100209	-0.131815	0.0209776		ENSG00000124614	-0.136355	0.015619		ENSG00000171223	0.528505	0.00589041		ENSG00000126091	-0.270477	0.0136162
ENSG00000100220	-0.153335	0.0460458		ENSG00000124813	-0.653816	0.00435702		ENSG00000171291	-0.220537	0.00197946		ENSG00000126264	-0.139561	7.59301e-05
ENSG00000100311	0.722173	0.00143804		ENSG00000125538	1.38322	0.000210002		ENSG00000171603	-0.371971	0.00522788		ENSG00000126457	-0.175108	5.44929e-09
ENSG00000100345	-0.237965	0.0123454		ENSG00000125814	-0.250121	0.00837073		ENSG00000171631	-0.274311	8.26441e-07		ENSG00000126464	-0.149025	0.0299845
ENSG00000100364	-0.334203	4.86322e-05		ENSG00000125944	-0.298762	0.0212844		ENSG00000172260	-0.440993	0.0055774		ENSG00000127220	-0.215106	7.13576e-11
ENSG00000100401	-0.165938	0.00407221		ENSG00000126001	-0.11702	0.0395583		ENSG00000172613	-0.193637	8.02535e-06		ENSG00000127663	-0.538813	0.00115146
ENSG00000100580	-0.292089	0.000950991		ENSG00000126216	-0.355774	0.00281458		ENSG00000173041	-0.276781	5.41988e-06		ENSG00000128245	-0.538916	0.0359597
ENSG00000100592	-0.199171	0.037255		ENSG00000126226	-0.154566	0.0202123		ENSG00000174652	-0.118797	0.016352		ENSG00000128739	-0.386103	0.0339895
ENSG00000100596	-0.389192	0.0136077		ENSG00000126858	-0.441222	0.00497331		ENSG00000175054	-0.490291	0.00252984		ENSG00000128989	-0.579415	1.0135e-08
ENSG00000100601	-0.144291	0.00289181		ENSG00000127990	-0.11978	0.0023776		ENSG00000175155	-0.300323	0.0212372		ENSG00000129084	-0.584712	0.0422115
ENSG00000100612	-0.138789	0.0140102		ENSG00000128016	0.475552	0.024217		ENSG00000175455	-0.228031	0.00132461		ENSG00000129691	-0.25683	1.97987e-06
ENSG00000100629	-0.290644	0.0147753		ENSG00000128245	-0.426374	0.000960323		ENSG00000176208	-0.123598	0.0275918		ENSG00000129968	-0.24321	0.0266367
ENSG00000100647	0.346602	0.0356469		ENSG00000128487	-0.523669	0.00606592		ENSG00000176542	-0.182086	0.0275918		ENSG00000130227	-0.284558	0.030042
ENSG00000100722	-0.244626	0.00104526		ENSG00000128731	-0.360212	0.0263294		ENSG00000177082	-0.143573	0.0183507		ENSG00000130479	-0.243656	0.0285414
ENSG00000100784	-0.189458	0.0269256		ENSG00000128805	-0.482577	0.028137		ENSG00000177311	-0.344739	0.00410708		ENSG00000130558	-0.34539	0.042336
ENSG00000100815	-0.198466	0.0314663		ENSG00000128815	-0.426758	0.0312567		ENSG00000178188	-0.177058	3.36714e-06		ENSG00000130559	-0.358494	0.00436471
ENSG00000100890	-0.222875	0.00920562		ENSG00000128872	-0.254416	0.029988		ENSG00000178573	-0.503707	0.0339756		ENSG00000130714	-0.125078	6.05075e-08
ENSG00000100906	0.693903	3.52481e-06		ENSG00000128915	-0.252608	0.0377226		ENSG00000178585	-0.125373	0.0156007		ENSG00000130803	-0.154007	2.08425e-08
ENSG00000100997	-0.31161	0.00318443		ENSG00000128928	-0.22286	0.0436051		ENSG00000179387	-0.157455	0.0285141		ENSG00000131100	-0.317707	0.0305656
ENSG00000101000	-0.137777	0.00710282		ENSG00000129084	-0.440392	0.012181		ENSG00000179833	-0.332634	0.000374385		ENSG00000131196	-0.28424	4.74994e-14
ENSG00000101017	0.25798	0.00345485		ENSG00000129292	-0.301849	0.0299644		ENSG00000179981	-0.142975	0.0310681		ENSG00000131711	-0.687038	0.0186587
ENSG00000101079	-0.232345	0.000128381		ENSG00000129534	-0.428024	0.0215019		ENSG00000180398	-0.171362	0.00116786		ENSG00000132341	-0.265986	0.0128853
ENSG00000101182	-0.132434	0.0211208		ENSG00000129691	-0.166355	0.022349		ENSG00000181631	-0.267179	5.36353e-07		ENSG00000133056	-0.243081	5.08012e-07
ENSG00000101210	-0.159319	0.0221368		ENSG00000130305	-0.120006	0.000839984		ENSG00000182054	-0.188509	0.00410708		ENSG00000133121	-0.875609	0.0316532
ENSG00000101247	-0.187673	0.00120963		ENSG00000130382	-0.226325	3.39774e-07		ENSG00000182179	-0.152264	0.000365241		ENSG00000133318	-0.649117	0.0250803
ENSG00000101336	0.450582	0.000730548		ENSG00000130560	-0.142374	0.0459528		ENSG00000182774	-0.269369	0.0157346		ENSG00000133997	-0.155206	1.38624e-09
ENSG00000101361	-0.100654	0.0388422		ENSG00000130956	-0.124365	0.028137		ENSG00000183230	-0.276294	0.0320686		ENSG00000134058	-0.199093	8.01714e-09
ENSG00000101439	-0.250006	0.0345593		ENSG00000131323	0.645355	0.00733322		ENSG00000183576	-0.346582	0.0368388		ENSG00000134243	-0.573681	0.0134678
ENSG00000101463	-0.803334	0.000453525		ENSG00000131508	-0.433721	0.00837073		ENSG00000184005	-0.899129	0.00306066		ENSG00000134265	-0.309877	0.0134844
ENSG00000101474	-0.300904	0.00966107		ENSG00000131711	-0.533392	0.00159727		ENSG00000185236	-0.140665	0.00476071		ENSG00000134287	-0.243509	0.00959578
ENSG00000101493	-0.225522	0.0278682		ENSG00000131773	-0.608671	0.00826442		ENSG00000185274	-0.172568	0.0450151		ENSG00000134910	-0.209585	6.89342e-19
ENSG00000101577	-0.342856	0.00272548		ENSG00000132718	-0.202355	0.00301207		ENSG00000185324	-0.182667	0.00410708		ENSG00000135108	-0.271108	2.39642e-24
ENSG00000101639	-0.286607	0.00434829		ENSG00000132970	-0.13287	0.0282427		ENSG00000186020	-0.144148	0.0275918		ENSG00000135205	-0.456902	0.00489876
ENSG00000102032	-0.10336	0.00608311		ENSG00000133028	-0.11162	0.00640311		ENSG00000186318	-0.168141	0.000512566		ENSG00000135407	-0.161998	0.000221313
ENSG00000102054	-0.105851	0.028779		ENSG00000133119	-0.266316	1.03432e-12		ENSG00000187094	-0.305361	0.0213604		ENSG00000135605	-0.164005	0.0305656
ENSG00000102572	-0.21842	0.0250179		ENSG00000133246	-0.312972	0.0320854		ENSG00000196284	-0.588855	0.0133503		ENSG00000135801	-0.175909	1.68984e-09
ENSG00000102699	-0.272482	0.0186908		ENSG00000133275	-0.193171	0.0121582		ENSG00000196705	-0.319972	0.0349695		ENSG00000135966	-0.295389	7.53086e-15
ENSG00000102710	-0.20431	0.0097612		ENSG00000134070	0.725704	0.00160039		ENSG00000197586	-0.213783	0.000149082		ENSG00000135968	-0.400518	0.0158142
ENSG00000102738	-0.168764	0.034865		ENSG00000134313	-0.330289	0.0459204		ENSG00000197859	-0.245773	0.0298635		ENSG00000136003	-0.317377	2.9848e-08
ENSG00000102879	-0.167939	0.0208005		ENSG00000134490	-0.222754	0.044779		ENSG00000198363	-0.371865	0.0187451		ENSG00000136811	-0.155314	6.63054e-09
ENSG00000102910	-0.301648	0.00506886		ENSG00000134627	-0.147844	0.0338997		ENSG00000198718	-0.308427	3.05769e-05		ENSG00000136842	-0.236222	0.00128939
ENSG00000103034	-0.111173	0.0499576		ENSG00000134779	-0.158547	0.0105691		ENSG00000198843	-0.336449	4.66755e-07		ENSG00000136854	-0.460081	1.42004e-07
ENSG00000103061	-0.13675	0.0241362		ENSG00000135597	-0.411328	5.89238e-05		ENSG00000198846	-0.155875	0.00554124		ENSG00000136888	-0.230127	0.00287409
ENSG00000103064	-0.246903	0.0192601		ENSG00000135677	-0.208386	0.0281649		ENSG00000198853	-0.246684	0.00022442		ENSG00000136933	-0.196142	1.00558e-18
ENSG00000103091	-0.201378	0.0119493		ENSG00000135749	-0.559868	0.0104783		ENSG00000204859	-0.122302	0.0173273		ENSG00000137200	-0.201108	7.36554e-12
ENSG00000103249	-0.134217	0.0192287		ENSG00000135775	-0.15969	0.0294205		ENSG00000205659	-0.231999	0.0187451		ENSG00000137364	-0.22291	0.000452801
ENSG00000103365	-0.277849	0.0121703		ENSG00000135951	-0.181366	0.0357364		ENSG00000206562	-0.115382	0.0485666		ENSG00000137942	-0.606553	0.00426495
ENSG00000103381	-0.243866	0.00477323		ENSG00000135972	-0.163222	0.0112226		ENSG00000213923	-0.202394	0.000193671		ENSG00000138029	-0.331527	0.00549865
ENSG00000103479	-0.216429	0.00715984		ENSG00000136003	-0.150703	0.0034082		ENSG00000218336	-0.121941	0.00933892		ENSG00000138433	-0.295879	4.34975e-40
ENSG00000103544	-0.206821	0.0386398		ENSG00000136098	-0.158283	0.00640311		ENSG00000225663	-0.114883	0.0485666		ENSG00000138463	-0.242691	0.0285414
ENSG00000103550	-0.117437	0.00330903		ENSG00000136111	-0.467823	0.00123523		ENSG00000225921	-0.148743	0.0331411		ENSG00000138640	-0.779292	0.00708028
ENSG00000103671	-0.200183	0.0114101		ENSG00000136144	-0.196446	0.0192929		ENSG00000241399	-0.343279	0.000165784		ENSG00000138641	-0.424979	0.0349415
ENSG00000103707	-0.13798	0.0351482		ENSG00000136161	-0.361951	0.00531423		ENSG00000261115	-0.190543	0.031776		ENSG00000138735	-0.205505	0.0281108
ENSG00000104043	-0.386255	0.0182065		ENSG00000136193	-0.251169	0.00186084		ENSG00000272602	-0.176367	0.00027305		ENSG00000139597	-0.368737	0.00584463
ENSG00000104067	-0.200253	0.0223223		ENSG00000136381	-0.305873	0.0157112		ENSG00000273079	-0.226496	0.00116786		ENSG00000139624	-0.337911	0.000719404
ENSG00000104205	-0.271376	0.0338315		ENSG00000136504	-0.135512	0.0499548		ENSG00000274523	-0.161027	1.69627e-09		ENSG00000139636	-0.228277	0.0497327
ENSG00000104219	-0.174151	0.0466237		ENSG00000136631	-0.305042	0.0390824						ENSG00000139645	-0.188064	1.01842e-10
ENSG00000104231	-0.101283	0.0241362		ENSG00000136717	-0.5954	0.00497331						ENSG00000139718	-0.177084	4.71663e-24
ENSG00000104529	-0.166755	0.0244131		ENSG00000136842	-0.239058	3.24693e-08						ENSG00000139946	-0.434869	0.00590532
ENSG00000104660	-0.13387	0.0314663		ENSG00000136891	-0.169354	0.0282427						ENSG00000140474	-0.149806	0.0367135
ENSG00000104687	-0.133047	0.044926		ENSG00000136925	-0.163896	0.00933628						ENSG00000140829	-0.132376	0.0338107
ENSG00000104714	-0.242622	0.0385066		ENSG00000136935	-0.161461	0.0435718						ENSG00000141446	-0.298672	0.0238418
ENSG00000104763	-0.252233	0.0447893		ENSG00000137210	-0.29329	0.00772455						ENSG00000141452	-0.232797	0.00175219
ENSG00000104852	-0.280954	0.00111329		ENSG00000137288	-0.151994	5.89859e-06						ENSG00000141458	-0.40754	0.0273929
ENSG00000104870	-0.164154	0.0440419		ENSG00000137331	0.786667	0.000246271						ENSG00000141540	-0.23407	1.04038e-09
ENSG00000104964	-0.171235	0.00843982		ENSG00000137393	1.044	0.00653446						ENSG00000141644	-0.183365	3.87369e-10
ENSG00000105122	-0.20744	0.000381382		ENSG00000137642	-0.533795	0.0310308						ENSG00000141699	-0.317179	3.19458e-12
ENSG00000105176	-0.231833	0.0348517		ENSG00000138119	-0.392907	0.0181978						ENSG00000142039	-0.160244	1.4751e-23
ENSG00000105223	-0.226875	0.00126671		ENSG00000138134	-0.342471	0.018649						ENSG00000142327	-0.150221	3.895e-10
ENSG00000105246	0.65576	2.32275e-05		ENSG00000138175	-0.136968	0.0249245						ENSG00000142856	-0.247116	6.31298e-12
ENSG00000105402	-0.103849	0.0398609		ENSG00000138303	-0.228733	0.0354884						ENSG00000142892	-0.206613	0.0356105
ENSG00000105568	-0.194396	0.000597838		ENSG00000138385	-0.155061	0.00207933						ENSG00000142920	-0.20013	0.000573223
ENSG00000105697	0.39621	0.0340615		ENSG00000138439	-0.242334	0.00301207						ENSG00000143669	-0.747833	0.0356192
ENSG00000105698	-0.234052	0.000591378		ENSG00000138463	-0.231261	0.0282427						ENSG00000143815	-0.242952	2.39992e-09
ENSG00000105701	-0.134694	0.00710282		ENSG00000138621	-0.188885	0.0282351						ENSG00000143878	-0.236929	0.0431115
ENSG00000105738	-0.317097	0.00521487		ENSG00000138709	-0.212092	0.0367575						ENSG00000144028	-0.237542	0.0209449
ENSG00000105819	-0.180043	7.30096e-05		ENSG00000139629	-0.111309	0.00933628						ENSG00000144320	-0.316031	1.55176e-05
ENSG00000105835	1.01123	2.04219e-05		ENSG00000139684	-0.136655	0.0154223						ENSG00000144455	-0.643673	0.0152941
ENSG00000105851	-0.217322	0.00509075		ENSG00000139726	-0.241226	0.00603016						ENSG00000144579	-0.139017	0.0490838
ENSG00000106028	-0.231238	0.00213309		ENSG00000139737	-0.169919	0.0034082						ENSG00000144619	-0.222182	4.86481e-08
ENSG00000106034	-0.441317	0.0143159		ENSG00000139826	-0.13755	0.0399348						ENSG00000144736	-0.302394	1.7937e-08
ENSG00000106049	-0.218625	0.028779		ENSG00000139921	-0.23517	0.000417286						ENSG00000144909	-0.376745	0.00109663
ENSG00000106066	-0.418494	0.00694957		ENSG00000140332	-0.318293	0.0100474						ENSG00000144959	-0.283681	0.0217008
ENSG00000106100	-0.253998	1.05454e-09		ENSG00000140416	-0.192907	0.00521062						ENSG00000145241	-0.338163	4.7031e-09
ENSG00000106299	-0.226406	0.00272271		ENSG00000141258	-0.143516	0.00736521						ENSG00000145284	-0.282039	2.10831e-09
ENSG00000106346	-0.161506	0.0241536		ENSG00000141446	-0.287139	0.000682105						ENSG00000145390	-1.05942	1.38194e-05
ENSG00000106415	-0.335117	0.000971226		ENSG00000142208	-0.130682	0.018649						ENSG00000145431	-0.408308	0.0136574
ENSG00000106524	-0.113825	0.00378213		ENSG00000142541	-0.38323	0.0151322						ENSG00000145604	-0.145542	0.040222
ENSG00000106608	-0.160997	0.0410858		ENSG00000142546	-0.122347	0.00139417						ENSG00000145703	-0.216174	2.7376e-05
ENSG00000106665	-0.267448	0.00330903		ENSG00000142583	-0.501723	0.0411902						ENSG00000146094	-0.292345	0.0392397
ENSG00000106683	-0.158518	0.00849807		ENSG00000142609	-0.217029	5.89238e-05						ENSG00000146592	-0.161093	0.0052756
ENSG00000106771	-0.190306	0.0419496		ENSG00000142875	-0.331775	0.0131945						ENSG00000146856	-0.152673	0.0489388
ENSG00000106785	-0.167112	0.0335458		ENSG00000143013	-0.251944	0.0354437						ENSG00000147010	-0.709717	0.0489388
ENSG00000107099	-0.460531	0.00241578		ENSG00000143079	-0.401014	0.0112226						ENSG00000147274	-0.488265	0.0168961
ENSG00000107223	-0.119561	0.0188381		ENSG00000143178	-0.111164	0.0377588						ENSG00000147364	-0.208593	5.80201e-33
ENSG00000107242	-0.283234	0.0136256		ENSG00000143256	-0.174589	0.00104726						ENSG00000147854	-0.339413	0.0416672
ENSG00000107521	-0.136702	0.0307078		ENSG00000143384	0.364884	0.0157332						ENSG00000148219	-0.315086	0.0005266
ENSG00000107669	-0.315567	0.00315988		ENSG00000143420	-0.238745	0.0335749						ENSG00000148334	-0.187778	0.000322451
ENSG00000107738	-0.331802	0.00268609		ENSG00000143643	-0.383645	0.0001777						ENSG00000148337	-0.144191	0.0486026
ENSG00000107829	-0.24096	0.0273252		ENSG00000143771	-0.11819	0.0420355						ENSG00000148411	-0.207079	8.52979e-06
ENSG00000107882	-0.210863	0.0458015		ENSG00000143799	-0.162973	0.0378732						ENSG00000149571	-0.228781	0.0217807
ENSG00000107902	-0.127054	0.028879		ENSG00000144028	-0.13966	0.048627						ENSG00000149930	-0.154875	1.17033e-11
ENSG00000108091	-0.172508	0.0180052		ENSG00000144290	-0.185188	0.0222698						ENSG00000151065	-0.279208	4.55847e-14
ENSG00000109046	0.324985	0.0108516		ENSG00000144802	0.77924	0.00335493						ENSG00000151148	-0.203268	7.57266e-10
ENSG00000109133	-0.123529	0.049221		ENSG00000144909	-0.300269	0.0209222						ENSG00000151320	-0.237997	0.0490222
ENSG00000109180	-0.194814	0.0307614		ENSG00000144935	-0.197653	0.0155333						ENSG00000151445	-0.157145	0.0349415
ENSG00000109189	-0.119277	0.0218191		ENSG00000145087	-0.227556	0.0350228						ENSG00000151702	-0.793227	0.014187
ENSG00000109320	1.02571	1.00192e-05		ENSG00000145246	-0.333767	0.0156573						ENSG00000151743	-0.254405	0.0349415
ENSG00000109323	-0.363554	0.00807866		ENSG00000145348	-0.538078	0.00126072						ENSG00000151746	-0.473257	0.0201246
ENSG00000109339	-0.331035	0.00144411		ENSG00000145569	-0.525159	0.000385468						ENSG00000152234	-0.303792	0.0217008
ENSG00000109458	-0.330976	0.00606822		ENSG00000145730	-0.277593	0.000839984						ENSG00000152583	-0.516044	0.0489388
ENSG00000109466	-0.264928	0.0364085		ENSG00000145782	-0.221925	0.00223119						ENSG00000153208	-1.20842	4.44105e-05
ENSG00000109572	-0.213882	0.0221368		ENSG00000146223	-0.153386	0.0438284						ENSG00000153561	-0.289672	0.0421328
ENSG00000109654	-0.140545	0.0447893		ENSG00000146278	0.435067	0.0135597						ENSG00000153707	-0.562101	0.00451843
ENSG00000109794	-0.460791	0.0097612		ENSG00000146426	-0.310543	0.0391845						ENSG00000153933	-0.235196	7.90656e-14
ENSG00000109906	-0.516018	0.000282586		ENSG00000147044	-0.435642	0.00222859						ENSG00000154162	-0.231366	1.39022e-18
ENSG00000110048	-0.163354	0.00200888		ENSG00000147251	-0.406728	0.0332086						ENSG00000154265	-0.154223	0.0245067
ENSG00000110057	-0.213682	0.00608167		ENSG00000147889	-0.126286	0.028137						ENSG00000154309	-0.757966	0.0340862
ENSG00000110436	-0.220522	0.0331421		ENSG00000148082	-0.196965	8.60024e-05						ENSG00000154359	-0.142166	1.33169e-10
ENSG00000110721	-0.349206	0.0012819		ENSG00000148700	-0.151899	0.000683595						ENSG00000154743	-0.26286	0.00775243
ENSG00000110852	-0.138915	0.0186069		ENSG00000149196	-0.151148	0.0337007						ENSG00000154814	-0.334378	4.21131e-29
ENSG00000110888	-0.138447	0.00710282		ENSG00000149212	-0.337775	0.0156573						ENSG00000154845	-0.352552	0.0159358
ENSG00000110917	-0.172594	0.0203905		ENSG00000149311	-0.450742	0.0127151						ENSG00000155111	-0.553226	0.0370428
ENSG00000110934	-0.215615	0.0383315		ENSG00000149357	-0.156996	0.0237572						ENSG00000155252	-0.133194	9.89569e-06
ENSG00000111110	-0.100644	0.0394443		ENSG00000149932	-0.125519	0.0235064						ENSG00000155816	-0.195228	0.0299677
ENSG00000111145	-0.208024	0.0314348		ENSG00000150540	-0.237126	0.044779						ENSG00000156299	-0.686295	0.0217807
ENSG00000111300	-0.21356	0.0328637		ENSG00000150627	-0.129845	0.0113538						ENSG00000156398	-0.185685	5.87125e-08
ENSG00000111348	-0.319103	0.000352898		ENSG00000150636	-0.246784	0.0114051						ENSG00000156469	-0.143479	4.09815e-10
ENSG00000111361	-0.13139	0.00691913		ENSG00000150681	-0.181753	0.0293164						ENSG00000157077	-0.314143	0.00197711
ENSG00000111596	-0.305316	0.0170504		ENSG00000150787	-0.18571	0.00037779						ENSG00000157152	-0.252665	6.27454e-07
ENSG00000111615	-0.175854	3.02713e-05		ENSG00000150995	-0.450866	0.00602611						ENSG00000157445	-0.244059	3.78774e-09
ENSG00000111666	-0.286581	0.000854018		ENSG00000151065	-0.157173	0.0476041						ENSG00000157637	-0.417732	0.0236404
ENSG00000111670	-0.211943	0.0165236		ENSG00000151135	-0.128661	0.0425381						ENSG00000157693	-0.296839	0.00111681
ENSG00000111707	-0.111319	0.00428302		ENSG00000151465	-0.212769	0.0335749						ENSG00000158528	-0.234053	9.08552e-05
ENSG00000111716	-0.180757	0.0056512		ENSG00000151503	-0.145347	0.0113121						ENSG00000158864	-0.282577	0.0112009
ENSG00000111731	-0.276462	0.0206639		ENSG00000151702	-0.519257	0.0351535						ENSG00000160190	-0.23618	0.0245027
ENSG00000111785	-0.24522	0.00100207		ENSG00000151746	-0.372314	0.041053						ENSG00000160746	-0.471812	0.0125128
ENSG00000111802	-0.104076	0.0296496		ENSG00000151883	-0.495691	0.0065694						ENSG00000160908	-0.190559	8.7798e-12
ENSG00000111850	-0.151798	0.0003633		ENSG00000152082	-0.129392	0.0397007						ENSG00000160991	-0.170513	0.0224724
ENSG00000111877	-0.255404	0.00289181		ENSG00000152104	-0.236469	0.00767392						ENSG00000160999	-0.272397	0.00620679
ENSG00000111897	-0.241913	0.00399319		ENSG00000152359	-0.202811	0.00335493						ENSG00000161671	-0.172789	4.93899e-09
ENSG00000112033	0.420858	0.0063235		ENSG00000152404	-0.265052	0.0202123						ENSG00000161921	-0.229313	0.0364464
ENSG00000112146	-0.196758	0.00490155		ENSG00000152457	-0.238998	0.0186332						ENSG00000162032	-0.16815	1.99856e-08
ENSG00000112149	1.39547	1.57123e-09		ENSG00000152465	-0.114595	0.0156573						ENSG00000162601	-0.434797	3.76021e-07
ENSG00000112305	-0.253748	0.0268006		ENSG00000152942	-0.116841	0.0418459						ENSG00000162627	-0.162435	1.88161e-07
ENSG00000112425	-0.148059	0.0193637		ENSG00000153006	-0.151502	0.0202123						ENSG00000162769	-0.182005	0.00171694
ENSG00000112576	-0.429804	0.00391235		ENSG00000153879	-0.121684	0.0113538						ENSG00000162882	-0.124351	4.62086e-06
ENSG00000112624	-0.267107	0.0254221		ENSG00000154146	-0.338851	0.028137						ENSG00000162927	-0.186248	8.36277e-09
ENSG00000112799	-0.42852	0.00606741		ENSG00000154330	-0.348646	0.0320854						ENSG00000163138	-0.250187	2.12049e-07
ENSG00000112992	-0.274992	0.00268609		ENSG00000154473	-0.113893	0.00175691						ENSG00000163235	-0.275885	1.39336e-12
ENSG00000113269	-0.416499	0.00486126		ENSG00000154511	-0.316046	0.000749265						ENSG00000163312	-0.224733	6.25901e-20
ENSG00000113558	-0.164341	0.0351864		ENSG00000154727	-0.153046	0.0212376						ENSG00000163536	-0.312269	4.41748e-06
ENSG00000113593	-0.145773	0.0181134		ENSG00000154743	-0.184076	0.0126316						ENSG00000163590	-0.409233	0.00837099
ENSG00000113916	0.669219	2.11736e-05		ENSG00000154889	-0.248173	0.000766323						ENSG00000163635	-0.351443	0.0104001
ENSG00000113971	-0.129187	0.0464907		ENSG00000155034	-0.139385	5.5108e-05						ENSG00000163798	-0.14268	2.41903e-11
ENSG00000114013	-0.426759	0.00578642		ENSG00000155096	0.391011	0.0425353						ENSG00000163814	-0.256276	6.1971e-06
ENSG00000114279	-0.208612	0.0250179		ENSG00000155158	-0.139273	0.00826442						ENSG00000163867	-0.283913	1.16286e-05
ENSG00000114423	-0.23964	0.0118153		ENSG00000155636	-0.18318	0.00159727						ENSG00000163945	-0.214632	0.00651682
ENSG00000114650	-0.126672	0.0476203		ENSG00000155792	-0.389312	0.00852651						ENSG00000163947	-0.241848	2.74567e-14
ENSG00000114757	-0.185423	0.000997975		ENSG00000155886	-0.200002	0.0137904						ENSG00000164187	-0.263997	1.12067e-06
ENSG00000114770	-0.235322	0.00178528		ENSG00000155903	-0.438595	0.0202554						ENSG00000164292	-0.334424	0.00193871
ENSG00000114978	-0.244306	0.0061289		ENSG00000155926	-0.477251	0.0368785						ENSG00000164323	-0.251404	6.46951e-06
ENSG00000115109	-0.206707	0.000723244		ENSG00000155970	-0.361022	0.00282639						ENSG00000164466	-0.243006	0.0481272
ENSG00000115183	-0.309806	0.0128514		ENSG00000156298	-0.183549	0.0481404						ENSG00000164654	-0.376499	0.0256788
ENSG00000115207	-0.14519	0.0265232		ENSG00000156467	-0.257835	0.0390335						ENSG00000165025	-0.660298	0.045521
ENSG00000115355	-0.288836	0.0298874		ENSG00000156531	-0.211018	0.00640311						ENSG00000165138	-0.147262	9.65392e-08
ENSG00000115525	-0.256408	0.00330903		ENSG00000156787	-0.180471	4.25084e-07						ENSG00000165219	-0.522602	0.000541688
ENSG00000115839	-0.271269	0.0331421		ENSG00000156958	-0.316313	0.00547489						ENSG00000165288	-0.396249	0.0266367
ENSG00000115935	-0.32277	0.0327097		ENSG00000157077	-0.209159	0.00296872						ENSG00000165457	-0.164964	8.2109e-06
ENSG00000115947	-0.202036	0.00841967		ENSG00000157212	-0.144574	0.00183431						ENSG00000165650	-0.280288	0.00714405
ENSG00000115956	1.49866	8.68199e-09		ENSG00000157303	-0.21656	0.0140338						ENSG00000165714	-0.308547	8.53646e-24
ENSG00000116044	0.338942	0.019377		ENSG00000157426	-0.142426	0.0435718						ENSG00000165792	-0.192371	6.33797e-09
ENSG00000116127	-0.177814	0.0329266		ENSG00000157557	0.478384	0.0392949						ENSG00000165813	-0.210962	0.00305079
ENSG00000116260	-0.196136	6.71224e-05		ENSG00000157657	-0.323687	0.0208994						ENSG00000165914	-0.387732	0.0238221
ENSG00000116514	0.399176	0.00874069		ENSG00000158528	-0.140737	0.00785334						ENSG00000166035	-0.272615	2.1897e-10
ENSG00000116704	-0.122342	0.0364414		ENSG00000158604	-0.139177	3.95344e-05						ENSG00000166181	-0.281028	0.00372553
ENSG00000116793	-0.126837	0.0293277		ENSG00000158717	-0.246443	0.00484421						ENSG00000166199	-0.123925	1.10225e-07
ENSG00000116815	0.682413	0.000236198		ENSG00000159128	0.450073	0.0351535						ENSG00000166266	-0.552999	0.00651183
ENSG00000116830	-0.134099	0.0468304		ENSG00000159593	-0.133183	0.00640311						ENSG00000166272	-0.54184	5.49584e-06
ENSG00000116871	-0.120838	0.037255		ENSG00000160193	-0.147759	0.0135597						ENSG00000166557	-0.249338	0.00119084
ENSG00000116906	-0.156613	0.0125413		ENSG00000160352	-0.144388	0.0411484						ENSG00000166927	-0.398213	0.036017
ENSG00000117151	-0.172446	0.00500624		ENSG00000160888	0.459528	0.00798598						ENSG00000166938	-0.198797	0.00780589
ENSG00000117153	-0.133126	0.00173621		ENSG00000161010	-0.114731	0.00933628						ENSG00000167005	-0.162002	0.0306322
ENSG00000117410	-0.156431	0.0304872		ENSG00000161671	-0.11328	0.0270655						ENSG00000167264	-0.133038	1.70443e-09
ENSG00000117419	-0.208551	0.0207693		ENSG00000161921	-0.157624	0.028137						ENSG00000167895	-0.604631	0.000166276
ENSG00000117448	-0.168708	0.0499576		ENSG00000162086	-0.202679	1.59135e-07						ENSG00000168118	-0.271027	4.81824e-08
ENSG00000117475	-0.116936	0.0228495		ENSG00000162104	-0.198599	0.0342157						ENSG00000168175	-0.296591	0.017668
ENSG00000117625	-0.201911	0.0432005		ENSG00000162302	-0.18952	0.00547489						ENSG00000168439	-0.275671	0.0347254
ENSG00000117697	-0.348336	0.000155349		ENSG00000162378	-0.228365	0.0335749						ENSG00000168781	-0.285608	5.41284e-13
ENSG00000117906	-0.111403	0.041067		ENSG00000162664	-0.247653	0.00678399						ENSG00000168813	-0.201957	0.00276268
ENSG00000118263	0.325741	0.0211593		ENSG00000162714	-0.152344	0.000875008						ENSG00000168944	-0.261157	1.97002e-15
ENSG00000118308	-0.261564	0.0343076		ENSG00000162869	-0.277397	0.044075						ENSG00000169057	-0.523294	1.90041e-05
ENSG00000118412	-0.152974	0.0124159		ENSG00000162885	-0.174681	0.028137						ENSG00000169087	-0.413362	0.00778667
ENSG00000118418	-0.23233	0.0019686		ENSG00000162980	-0.422248	0.00126255						ENSG00000169131	-0.169607	2.21189e-08
ENSG00000118420	-0.226034	0.0294557		ENSG00000163161	-0.206892	0.00978202						ENSG00000169139	-0.343097	1.15661e-100
ENSG00000118482	-0.273285	0.00800628		ENSG00000163491	-0.307767	6.04676e-05						ENSG00000169249	-0.226342	0.0113159
ENSG00000118503	1.14909	1.22332e-08		ENSG00000163513	-0.464753	0.0393853						ENSG00000169398	-0.794256	0.017438
ENSG00000118507	-0.291395	0.00074379		ENSG00000163536	-0.166516	0.028137						ENSG00000169519	-0.444379	0.0208133
ENSG00000118508	-0.102438	0.0138641		ENSG00000163755	-0.33835	0.0222258						ENSG00000169604	-0.141652	2.48899e-07
ENSG00000118515	0.592223	0.000432296		ENSG00000163781	-0.180506	0.0312567						ENSG00000169696	-0.170513	9.80869e-12
ENSG00000118518	-0.133441	0.0492437		ENSG00000163848	-0.428913	0.029988						ENSG00000169756	-0.783937	0.000936388
ENSG00000118564	-0.263388	0.0228966		ENSG00000164010	-0.215205	0.00510589						ENSG00000169902	-0.267248	4.13144e-16
ENSG00000118689	-0.353104	0.0353127		ENSG00000164144	-0.388295	0.00420024						ENSG00000169946	-0.164428	0.0401696
ENSG00000119042	-0.189323	0.000434235		ENSG00000164180	-0.248575	0.000785864						ENSG00000170004	-0.198074	0.00582189
ENSG00000119535	-0.265974	0.0386366		ENSG00000164543	-0.330051	0.000137635						ENSG00000170185	-0.14308	9.69498e-08
ENSG00000119638	-0.16069	0.0273252		ENSG00000164941	-0.189806	0.0203854						ENSG00000170502	-0.201651	7.00241e-08
ENSG00000119912	-0.186939	0.0196862		ENSG00000164989	-0.198979	0.0227739						ENSG00000171045	-0.151591	0.0165835
ENSG00000119929	-0.140044	0.00407221		ENSG00000165025	-0.445357	0.033817						ENSG00000171291	-0.208828	0.00163364
ENSG00000120129	0.362472	0.0150586		ENSG00000165138	-0.155412	0.000484085						ENSG00000171314	-0.273401	0.0420925
ENSG00000120251	-0.182496	0.0376831		ENSG00000165209	-0.337729	0.0290181						ENSG00000171492	-0.560479	5.68916e-05
ENSG00000120451	-0.166834	0.0422066		ENSG00000165264	-0.115115	0.00783766						ENSG00000171659	-0.447791	0.000818096
ENSG00000120688	-0.110158	0.0343002		ENSG00000165417	-0.18506	0.034929						ENSG00000171729	-0.497503	0.00197711
ENSG00000120725	-0.254066	0.0360787		ENSG00000165533	-0.189758	0.000397033						ENSG00000171824	-0.231089	3.83308e-17
ENSG00000120727	-0.155459	0.0206639		ENSG00000165675	-0.401219	0.0181978						ENSG00000171960	-0.103898	1.6486e-05
ENSG00000120733	-0.210785	0.0308674		ENSG00000166035	-0.250099	0.010306						ENSG00000172175	-0.408912	0.00539534
ENSG00000120868	-0.223368	0.0406218		ENSG00000166164	-0.187001	0.0307528						ENSG00000172461	-0.223495	1.14202e-06
ENSG00000120885	-0.263935	0.0427967		ENSG00000166167	-0.36361	0.0296828						ENSG00000172578	-0.421779	0.0428503
ENSG00000120992	-0.212121	0.0340615		ENSG00000166348	-0.112172	0.0185246						ENSG00000172878	-0.184021	1.94081e-06
ENSG00000121067	-0.181269	0.0456542		ENSG00000166439	-0.22506	0.0351535						ENSG00000173085	-0.253342	7.76456e-13
ENSG00000121542	-0.222474	0.0206639		ENSG00000166619	-0.205923	0.0411484						ENSG00000173214	-0.330058	0.00142001
ENSG00000121879	-0.277874	0.0119493		ENSG00000166847	-0.13641	0.0331024						ENSG00000173406	-0.353823	0.0447229
ENSG00000121933	-0.211785	0.0435397		ENSG00000166928	-0.145381	0.0335749						ENSG00000174282	-0.251909	0.0154614
ENSG00000121989	0.268392	0.0197659		ENSG00000166938	-0.190572	0.000481481						ENSG00000174482	-0.274842	0.000406755
ENSG00000122033	-0.139625	0.0309115		ENSG00000166974	-0.37479	0.00167008						ENSG00000174842	-0.263792	0.0138446
ENSG00000122406	-0.206493	0.049793		ENSG00000167257	-0.175998	0.0065694						ENSG00000174891	-0.5487	0.0111695
ENSG00000122643	-0.164495	0.0192945		ENSG00000167264	-0.100726	0.0246048						ENSG00000175106	-0.147019	0.00526043
ENSG00000122707	-0.308654	0.00583842		ENSG00000167470	0.318729	0.00345462						ENSG00000175161	-0.720969	0.00422261
ENSG00000122862	0.968928	6.71224e-05		ENSG00000167552	-0.32167	0.012375						ENSG00000175216	-0.322489	0.040538
ENSG00000123091	-0.145321	0.0210066		ENSG00000167635	-0.237784	3.36356e-05						ENSG00000175348	-0.227422	4.47171e-29
ENSG00000123200	-0.225519	0.0144037		ENSG00000167977	-0.130423	0.0210499						ENSG00000175390	-0.186907	2.08425e-08
ENSG00000123268	-0.18095	0.0210493		ENSG00000168014	-0.187026	0.0380935						ENSG00000175416	-0.201583	0.0033383
ENSG00000123416	-0.329986	0.0268006		ENSG00000168056	-0.133076	0.0151959						ENSG00000175567	-0.180791	1.34481e-06
ENSG00000123560	-0.251323	0.00434829		ENSG00000168092	-0.171793	0.0212376						ENSG00000175595	-0.175237	5.02571e-13
ENSG00000123607	-0.173029	0.0227564		ENSG00000168228	-0.114632	0.00420024						ENSG00000175787	-0.199658	0.00197711
ENSG00000123983	-0.248007	0.00323214		ENSG00000168264	-0.174253	0.010075						ENSG00000176204	-0.54364	8.78698e-05
ENSG00000124782	-0.416177	0.00533279		ENSG00000168918	-0.431771	0.0438284						ENSG00000176208	-0.115068	0.000295928
ENSG00000124783	-0.169448	0.0499576		ENSG00000169018	-0.163853	0.00223119						ENSG00000176261	-0.291753	0.00708135
ENSG00000124813	-0.339415	0.0351759		ENSG00000169251	-0.214046	0.00560915						ENSG00000176915	-0.280486	0.020159
ENSG00000125089	-0.314169	0.00988809		ENSG00000169288	-0.251038	0.0235064						ENSG00000177000	-0.364283	3.27281e-40
ENSG00000125247	-0.122108	0.000112327		ENSG00000169313	-0.629022	0.0118963						ENSG00000178074	-0.15894	0.04656
ENSG00000125249	-0.286102	0.000679277		ENSG00000169504	0.780812	0.00459467						ENSG00000178199	-0.1208	0.000482034
ENSG00000125257	-0.370075	0.0476203		ENSG00000169519	-0.465521	0.00653446						ENSG00000178568	-0.336443	0.0454212
ENSG00000125304	-0.264721	0.00345751		ENSG00000170088	-0.193433	0.0200415						ENSG00000178904	-0.309282	0.0026866
ENSG00000125354	-0.202277	0.0426342		ENSG00000170325	-0.17293	0.0181978						ENSG00000178927	-0.364132	0.0312325
ENSG00000125447	-0.195938	0.00383975		ENSG00000170390	-0.13267	0.0235064						ENSG00000178996	-0.318238	0.0364464
ENSG00000125482	-0.124297	0.0355807		ENSG00000170458	-0.35021	0.0350581						ENSG00000179387	-0.18349	0.00156272
ENSG00000125485	-0.130366	0.0320262		ENSG00000170522	-0.230702	0.00110984						ENSG00000180626	-0.133844	1.30566e-09
ENSG00000125538	1.32726	7.32506e-08		ENSG00000170891	-0.176255	0.000133176						ENSG00000181315	-0.186528	0.0218612
ENSG00000125703	-0.441726	2.22443e-06		ENSG00000171055	-0.448524	0.00587972						ENSG00000181481	-0.273481	0.0384712
ENSG00000125753	0.307335	0.00577568		ENSG00000171115	-0.228991	0.00175691						ENSG00000181991	-0.143132	0.0388032
ENSG00000125814	-0.147151	0.0423633		ENSG00000171497	-0.128952	0.0333935						ENSG00000182180	-0.233093	5.35242e-12
ENSG00000125846	-0.196023	1.05565e-05		ENSG00000171603	-0.345029	0.000524444						ENSG00000182220	-0.28303	3.95932e-06
ENSG00000126214	-0.262032	0.00828894		ENSG00000171862	-0.439743	0.028137						ENSG00000182511	-0.184766	0.000700446
ENSG00000126216	-0.254603	0.00841967		ENSG00000171863	-0.221812	0.0222258						ENSG00000182621	-0.416567	0.0166049
ENSG00000126217	-0.301232	0.0320188		ENSG00000171914	-0.552843	0.0148363						ENSG00000182670	-0.680556	0.0266367
ENSG00000126456	-0.154189	0.00330903		ENSG00000172086	-0.246865	0.0475036						ENSG00000183020	-0.411747	0.0144929
ENSG00000126773	-0.247429	0.00623718		ENSG00000172159	-0.280652	0.00301207						ENSG00000183323	-0.294356	1.56871e-06
ENSG00000126858	-0.356411	0.00164989		ENSG00000173391	0.670227	0.0202123						ENSG00000183648	-0.252207	0.000503353
ENSG00000126882	-0.204904	0.000670159		ENSG00000173406	-0.295738	0.0235682						ENSG00000183955	-0.206013	0.00597295
ENSG00000127022	-0.217945	0.0223223		ENSG00000173517	0.736492	0.00508658						ENSG00000184005	-1.5857	0.000419202
ENSG00000127914	-0.274814	0.017398		ENSG00000173660	-0.200001	0.0124687						ENSG00000184205	-0.242724	0.00228246
ENSG00000128016	0.513156	0.00136382		ENSG00000173674	-0.183645	0.035284						ENSG00000184207	-0.275829	4.68213e-11
ENSG00000128245	-0.236569	0.0402537		ENSG00000173757	-0.310836	0.0202123						ENSG00000184497	-0.142144	0.000423352
ENSG00000128272	-0.138365	0.0284119		ENSG00000174123	-0.329299	0.00087023						ENSG00000184939	-0.27147	0.000784242
ENSG00000128487	-0.412502	0.00382566		ENSG00000174456	-0.19199	0.00715676						ENSG00000185261	-0.454163	1.72983e-24
ENSG00000128573	-0.481494	0.015063		ENSG00000174738	-0.196313	0.0119211						ENSG00000185324	-0.155781	0.030042
ENSG00000128607	-0.292198	0.000225026		ENSG00000175054	-0.360202	0.0411902						ENSG00000185666	-0.160452	0.00439117
ENSG00000128654	-0.233792	0.00548389		ENSG00000175073	-0.252584	2.27521e-05						ENSG00000185825	-0.242292	0.0238418
ENSG00000128739	-0.229091	0.00119805		ENSG00000175182	-0.112666	0.0227739						ENSG00000185829	-0.267811	0.00129313
ENSG00000128805	-0.529117	0.00289181		ENSG00000175575	-0.159934	0.00417921						ENSG00000186153	-1.18279	0.000452801
ENSG00000128829	-0.217419	0.0272496		ENSG00000176623	-0.22327	0.0118963						ENSG00000186187	-0.263138	3.69956e-05
ENSG00000128849	-0.181803	0.00321342		ENSG00000176884	-0.240725	0.00767392						ENSG00000186350	-0.178521	0.00492552
ENSG00000128872	-0.217787	0.00623989		ENSG00000176974	-0.153227	0.0390401						ENSG00000186625	-0.155118	8.6721e-15
ENSG00000128881	-0.259247	0.0362962		ENSG00000176978	-0.185125	0.0112002						ENSG00000186660	-0.214461	0.0309667
ENSG00000128923	-0.173531	0.0280047		ENSG00000177311	-0.266338	0.028137						ENSG00000186868	-0.216528	0.00476069
ENSG00000129084	-0.28876	0.0376667		ENSG00000177707	-0.262628	0.00832286						ENSG00000187514	0.575823	0.0385416
ENSG00000129103	-0.118539	0.0473304		ENSG00000177853	-0.324314	0.0335749						ENSG00000187672	-0.875434	0.0145121
ENSG00000129422	-0.552329	1.203e-06		ENSG00000178188	-0.125244	0.0202123						ENSG00000188419	-0.590512	1.09247e-75
ENSG00000129636	-0.321637	0.0232547		ENSG00000178573	-0.611735	0.00744845						ENSG00000188554	-0.187535	0.0127972
ENSG00000129675	-0.383358	0.000282586		ENSG00000178694	-0.223358	0.0112226						ENSG00000188921	-0.285496	5.54672e-09
ENSG00000130021	-0.172898	0.049468		ENSG00000178695	-0.313695	0.0470516						ENSG00000189241	-0.378401	0.0431115
ENSG00000130066	0.611713	0.00108699		ENSG00000178996	-0.277385	0.022349						ENSG00000196209	-0.431062	0.0244445
ENSG00000130119	-0.105523	0.0280044		ENSG00000179021	-0.131705	0.0202123						ENSG00000196227	-0.248933	3.69861e-16
ENSG00000130202	0.250688	0.0197473		ENSG00000179104	-0.262108	0.0215019						ENSG00000196236	-0.184641	0.00416567
ENSG00000130348	-0.131929	0.0186908		ENSG00000179134	-0.215293	0.0177534						ENSG00000196510	-0.237022	0.000335712
ENSG00000130558	-0.153615	0.0295296		ENSG00000179532	-0.168572	0.0222698						ENSG00000196526	-0.151191	8.63245e-09
ENSG00000130584	0.467648	0.000201622		ENSG00000179833	-0.292776	0.0287726						ENSG00000196535	-0.202824	0.00118291
ENSG00000131127	-0.214573	0.00272256		ENSG00000180233	-0.60534	0.000631179						ENSG00000196636	-0.276263	8.25922e-10
ENSG00000131323	0.5192	0.00407221		ENSG00000180354	-0.297175	0.00223119						ENSG00000196705	-0.399478	0.000853003
ENSG00000131374	-0.415872	0.0212759		ENSG00000180530	-0.422162	0.0355666						ENSG00000196912	-0.210723	1.79427e-11
ENSG00000131389	-0.195887	0.0116225		ENSG00000180881	-0.217573	0.0475036						ENSG00000196950	-0.451319	0.00621041
ENSG00000131437	-0.145005	0.00168919		ENSG00000182149	-0.261469	0.0150437						ENSG00000197008	-0.162897	0.0250803
ENSG00000131473	-0.112037	0.0451461		ENSG00000182150	-0.320563	0.0229928						ENSG00000197056	-0.229969	5.95322e-27
ENSG00000131507	-0.236632	0.0228638		ENSG00000182197	-0.367492	0.0482269						ENSG00000197119	-0.338864	3.65943e-24
ENSG00000131697	-0.152895	0.012654		ENSG00000182400	-0.176637	0.013178						ENSG00000197329	-0.526927	0.0364464
ENSG00000131711	-0.31078	0.00845395		ENSG00000182541	0.553156	0.0356056						ENSG00000197343	-0.337079	0.00394492
ENSG00000131773	-0.767577	1.9611e-07		ENSG00000182578	-0.524301	0.00537306						ENSG00000197863	-0.122668	2.09676e-07
ENSG00000132305	-0.206443	0.00779811		ENSG00000182836	-0.338423	0.00087023						ENSG00000197965	-0.672797	0.0102117
ENSG00000132359	-0.264658	0.0244626		ENSG00000182901	-0.263074	0.00211782						ENSG00000198162	-0.592548	0.0103768
ENSG00000132669	-0.403195	0.0104876		ENSG00000183023	-0.592553	0.0443863						ENSG00000198498	-0.168207	7.76456e-13
ENSG00000132716	-0.200532	0.00116091		ENSG00000183808	-0.184586	0.0208994						ENSG00000198502	-0.177416	0.0201246
ENSG00000132842	-0.298222	0.0253611		ENSG00000183955	-0.144535	0.0420355						ENSG00000198520	-0.177496	4.02446e-09
ENSG00000133019	-0.147812	0.015088		ENSG00000184005	-1.32323	1.8148e-06						ENSG00000198626	-0.310352	2.72475e-06
ENSG00000133028	-0.122564	0.000670159		ENSG00000184445	-0.100558	0.0435718						ENSG00000198700	-0.350855	0.0235579
ENSG00000133059	-0.126447	0.0265232		ENSG00000184939	-0.135799	0.0441121						ENSG00000198707	-0.379664	0.00276924
ENSG00000133246	-0.304948	0.00289181		ENSG00000184992	-0.176792	0.0286724						ENSG00000198873	-0.397218	0.00727651
ENSG00000133302	-0.117048	0.0086486		ENSG00000185129	-0.230124	0.0354437						ENSG00000203666	-0.187033	4.82284e-05
ENSG00000133318	-0.280336	0.0180052		ENSG00000185215	0.548222	0.0067941						ENSG00000203791	-0.225635	0.00205573
ENSG00000133627	-0.126272	0.0229946		ENSG00000185246	-0.153235	0.0128964						ENSG00000204084	-0.372155	0.0339895
ENSG00000133872	-0.19984	0.0435397		ENSG00000185261	-0.249474	0.0320854						ENSG00000204116	-0.293922	3.66303e-08
ENSG00000133943	-0.217299	0.0252896		ENSG00000185619	-0.206955	0.0171069						ENSG00000204227	-0.175166	2.7385e-07
ENSG00000133958	-0.157705	0.00428562		ENSG00000185950	-0.390602	0.0106336						ENSG00000204463	-0.188484	7.36554e-12
ENSG00000133961	0.319662	0.0265993		ENSG00000186063	-0.434782	0.00405669						ENSG00000204859	-0.119512	1.82563e-06
ENSG00000134070	0.633555	7.38873e-05		ENSG00000186417	-0.582858	0.039153						ENSG00000205060	-0.212312	0.000784242
ENSG00000134121	-0.122451	0.00779811		ENSG00000186448	-0.139894	0.037901						ENSG00000205659	-0.270178	0.0128773
ENSG00000134207	-0.219303	0.0227516		ENSG00000186470	-0.127734	0.0149381						ENSG00000206530	-0.145425	1.10455e-07
ENSG00000134245	-0.233024	0.0331421		ENSG00000186532	-0.158792	0.0355666						ENSG00000213995	-0.129562	6.22195e-06
ENSG00000134480	-0.41575	0.0226171		ENSG00000186868	-0.158325	0.0155736						ENSG00000214954	-0.393656	0.00160125
ENSG00000134508	-0.250156	0.00078668		ENSG00000186952	-0.156046	0.0290181						ENSG00000215440	-0.169716	0.00294244
ENSG00000134686	-0.424151	0.00375309		ENSG00000187257	-0.329479	0.00114718						ENSG00000217128	-0.494302	0.0124299
ENSG00000134698	-0.284805	0.0218191		ENSG00000187715	-0.412775	0.028137						ENSG00000223496	-0.207101	0.00186183
ENSG00000134779	-0.138027	0.0154808		ENSG00000188690	-0.130317	0.0191532						ENSG00000235162	-0.546704	0.000725173
ENSG00000134882	-0.275845	0.0450763		ENSG00000189091	-0.193811	0.0367028						ENSG00000238083	-0.267718	1.08207e-05
ENSG00000134910	-0.106831	0.0314663		ENSG00000196227	-0.152363	0.00193613						ENSG00000246922	-0.125526	2.86581e-10
ENSG00000134996	-0.243609	0.0355807		ENSG00000196268	-0.16019	0.0131106						ENSG00000256235	-0.157061	5.87125e-08
ENSG00000135049	-0.276643	0.0466018		ENSG00000196950	-0.338591	0.00733322						ENSG00000256525	-0.167855	2.10505e-13
ENSG00000135185	-0.188904	0.000640962		ENSG00000197093	-0.204651	0.00354582						ENSG00000258227	-0.191382	3.36598e-05
ENSG00000135298	-0.308984	0.0459057		ENSG00000197798	-0.187459	0.000897321						ENSG00000260916	-0.341472	1.01486e-15
ENSG00000135299	-0.169805	0.0294557		ENSG00000197959	-0.343639	0.018263						ENSG00000265354	-0.213257	0.00193871
ENSG00000135317	-0.23749	0.0440158		ENSG00000198015	-0.150969	0.0121043						ENSG00000268043	-0.264539	3.17313e-05
ENSG00000135363	-0.251049	0.0187083		ENSG00000198162	-0.326473	0.044779						ENSG00000272325	-0.388518	0.0266367
ENSG00000135472	-0.218341	0.00028086		ENSG00000198169	-0.200023	0.00806199						ENSG00000272602	-0.235919	0.000212895
ENSG00000135486	-0.154617	0.0474699		ENSG00000198176	-0.131506	0.0128363						ENSG00000273079	-0.225465	0.0236586
ENSG00000135540	-0.369671	0.0430111		ENSG00000198286	-0.348592	0.0414525						ENSG00000274211	-0.175732	6.67844e-10
ENSG00000135541	-0.251769	0.00695862		ENSG00000198556	-0.138423	0.0436202						ENSG00000275395	-0.922862	0.00959578
ENSG00000135596	-0.149168	0.0158055		ENSG00000198663	-0.314951	2.64444e-08
ENSG00000135597	-0.271376	0.00226651		ENSG00000198689	-0.174209	0.000897321
ENSG00000135643	-0.178565	0.00188585		ENSG00000198707	-0.252727	0.0122938
ENSG00000135775	-0.131713	0.0239081		ENSG00000198771	-0.443943	0.0202123
ENSG00000135776	-0.15626	0.00168919		ENSG00000198853	-0.18281	0.0435718
ENSG00000135823	-0.229825	0.0225038		ENSG00000198873	-0.323946	0.0103686
ENSG00000135837	-0.277746	0.0474025		ENSG00000198876	-0.148184	0.0310308
ENSG00000135899	-0.235244	0.0488877		ENSG00000198879	-0.618824	0.00211782
ENSG00000135916	-0.121921	0.0438839		ENSG00000198919	-0.173702	0.0227739
ENSG00000135966	-0.126736	0.0399958		ENSG00000203880	-0.174696	0.00640311
ENSG00000135976	-0.236071	0.00737539		ENSG00000204138	-0.32594	0.02779
ENSG00000136044	-0.326935	0.019377		ENSG00000204946	-0.143856	0.00218905
ENSG00000136048	0.277188	0.0187385		ENSG00000205133	-0.181775	0.00978202
ENSG00000136051	-0.297318	0.0097612		ENSG00000205268	-0.287849	0.013178
ENSG00000136111	-0.447337	0.000574859		ENSG00000205581	-0.312405	0.00159727
ENSG00000136143	-0.190709	0.0228866		ENSG00000205629	-0.189234	0.000865445
ENSG00000136146	-0.160926	0.00976837		ENSG00000205726	-0.272882	0.0234318
ENSG00000136153	-0.227264	0.00469916		ENSG00000211455	-0.297174	0.0326517
ENSG00000136161	-0.265664	0.0118808		ENSG00000214226	-0.154437	0.0220243
ENSG00000136193	-0.177029	0.0192601		ENSG00000214954	-0.274404	0.025529
ENSG00000136237	-0.162441	0.010026		ENSG00000219200	-0.177787	0.00126072
ENSG00000136381	-0.211827	0.0307614		ENSG00000226124	-0.312137	0.024217
ENSG00000136448	-0.196905	0.0355736		ENSG00000235162	-0.416679	2.76194e-06
ENSG00000136485	-0.272503	0.00164989		ENSG00000238083	-0.220922	0.00223119
ENSG00000136531	-0.124278	0.0464539		ENSG00000241399	-0.32965	0.00116388
ENSG00000136560	0.450189	0.00592222		ENSG00000243147	-0.160703	0.000430791
ENSG00000136603	0.330098	0.0440419		ENSG00000243646	-0.19644	0.0247276
ENSG00000136636	-0.153064	0.000574859		ENSG00000250312	-0.323799	0.0147473
ENSG00000136717	-0.478835	0.00477323		ENSG00000255302	-0.18393	0.047684
ENSG00000136738	-0.172615	0.0463838		ENSG00000260314	-0.503493	2.06946e-08
ENSG00000136842	-0.166915	0.0106798		ENSG00000265972	-0.421657	0.00089068
ENSG00000136874	-0.146586	0.0250179		ENSG00000266094	0.605414	0.0124223
ENSG00000136895	-0.301215	0.00880348		ENSG00000272325	-0.29344	0.00537306
ENSG00000137075	-0.259434	0.0314401		ENSG00000275342	-0.232437	0.00978202
ENSG00000137161	-0.185497	0.019433		ENSG00000279170	-0.177941	0.0106564
ENSG00000137331	0.598604	0.000101463
ENSG00000137364	-0.104907	0.0449914
ENSG00000137393	1.40386	4.49657e-12
ENSG00000137449	-0.148045	0.0393805
ENSG00000137491	-0.357627	0.041067
ENSG00000137575	0.330031	0.019377
ENSG00000137642	-0.563801	0.000880809
ENSG00000137817	-0.130596	0.0329266
ENSG00000137822	-0.111128	0.00242191
ENSG00000137834	-0.132256	0.0230513
ENSG00000137842	-0.16655	0.00315988
ENSG00000137871	-0.287239	0.0097612
ENSG00000138002	-0.108649	0.00509492
ENSG00000138018	-0.154327	0.0259449
ENSG00000138050	-0.232023	0.00195544
ENSG00000138095	-0.296765	0.00515315
ENSG00000138134	-0.306178	0.00649955
ENSG00000138175	-0.108873	0.0207256
ENSG00000138182	-0.148449	0.00490155
ENSG00000138190	-0.307061	0.00652674
ENSG00000138246	-0.26975	0.0379027
ENSG00000138380	-0.145874	0.0142948
ENSG00000138399	-0.224276	0.00319141
ENSG00000138413	-0.209264	0.00559171
ENSG00000138439	-0.218011	0.000387553
ENSG00000138468	-0.227103	0.0371739
ENSG00000138613	-0.124739	0.0355337
ENSG00000138640	-0.386646	0.0210327
ENSG00000138670	0.501279	0.00143804
ENSG00000138674	-0.260068	0.0206626
ENSG00000138756	-0.381856	0.0391795
ENSG00000138760	-0.332948	1.64834e-05
ENSG00000138814	-0.331901	0.0136256
ENSG00000139146	-0.185499	0.00583842
ENSG00000139350	-0.120932	0.00319141
ENSG00000139370	-0.202235	0.00243671
ENSG00000139436	-0.271394	0.0192601
ENSG00000139508	-0.115041	0.0464907
ENSG00000139679	-0.433643	0.00920562
ENSG00000139684	-0.142593	0.000842693
ENSG00000139726	-0.155612	0.0360787
ENSG00000139910	-0.119262	0.0208581
ENSG00000139971	-0.264954	0.00907753
ENSG00000140548	-0.388067	0.00841967
ENSG00000140694	-0.208363	0.046185
ENSG00000141385	-0.115724	0.0435729
ENSG00000141401	-0.142438	0.0273252
ENSG00000141425	-0.179179	0.0464907
ENSG00000141441	-0.381608	0.0182674
ENSG00000141447	-0.252486	0.0386359
ENSG00000141452	-0.131477	0.0121674
ENSG00000141458	-0.307133	0.00119805
ENSG00000141646	-0.213838	0.0269256
ENSG00000141837	-0.326661	0.0234945
ENSG00000142186	-0.121127	0.00441798
ENSG00000142192	-0.339604	0.000155147
ENSG00000142347	-0.29795	0.0427446
ENSG00000142453	-0.131718	0.0241859
ENSG00000142856	-0.152579	0.00605956
ENSG00000142875	-0.284567	0.00590886
ENSG00000142892	-0.142089	0.0363952
ENSG00000143013	-0.174695	0.0423633
ENSG00000143033	-0.196146	0.039376
ENSG00000143158	-0.14888	0.00941286
ENSG00000143162	-0.204497	0.0155553
ENSG00000143164	-0.330134	0.0325709
ENSG00000143198	-0.283644	4.36245e-08
ENSG00000143333	0.402592	0.0256086
ENSG00000143384	0.368896	0.00106441
ENSG00000143641	-0.294544	0.0389841
ENSG00000143643	-0.201187	0.0436648
ENSG00000143748	-0.169798	0.0304872
ENSG00000143772	-0.170454	0.0297188
ENSG00000143815	-0.144419	0.0250179
ENSG00000143889	-0.165461	0.0250179
ENSG00000143891	-0.160283	0.00272271
ENSG00000143933	-0.410815	0.00428562
ENSG00000144161	-0.185123	0.00392108
ENSG00000144401	-0.185059	0.0243756
ENSG00000144455	-0.328398	0.0495385
ENSG00000144468	-0.303964	0.00386408
ENSG00000144504	-0.231461	0.0170232
ENSG00000144535	-0.258248	0.0218783
ENSG00000144559	-0.146939	0.0465899
ENSG00000144713	-0.283206	0.0117951
ENSG00000144749	-0.212095	1.81283e-05
ENSG00000144802	1.05302	2.08249e-09
ENSG00000144893	-0.203627	0.018387
ENSG00000144909	-0.214369	0.0430111
ENSG00000145087	-0.220802	0.00734574
ENSG00000145088	-0.19998	0.0379027
ENSG00000145241	-0.233405	0.000475814
ENSG00000145246	-0.280112	0.00573469
ENSG00000145332	-0.265711	0.00490108
ENSG00000145348	-0.258654	0.0485673
ENSG00000145390	-0.618859	2.907e-05
ENSG00000145526	-0.16312	0.0229946
ENSG00000145604	-0.168289	0.000405021
ENSG00000145675	-0.350736	0.0325756
ENSG00000145685	-0.504727	0.00441896
ENSG00000145725	-0.277304	0.00195925
ENSG00000145782	-0.159512	0.015063
ENSG00000145901	0.219223	0.0142661
ENSG00000146083	-0.122856	0.000854018
ENSG00000146090	-0.397356	0.0261185
ENSG00000146192	-0.29302	0.0192305
ENSG00000146278	0.322315	0.00619907
ENSG00000146373	-0.269174	0.0189524
ENSG00000146409	-0.227656	4.58825e-05
ENSG00000146776	-0.267143	0.0355807
ENSG00000146828	-0.178196	0.0136126
ENSG00000146830	-0.171313	0.000161903
ENSG00000147010	-0.363899	0.0079437
ENSG00000147044	-0.273185	0.0250381
ENSG00000147124	-0.115224	0.035937
ENSG00000147202	-0.351999	0.0419496
ENSG00000147274	-0.20694	0.049221
ENSG00000147316	-0.257089	0.0269256
ENSG00000147481	-0.263656	0.00148094
ENSG00000147684	-0.133349	0.00017831
ENSG00000148090	-0.247675	0.014039
ENSG00000148154	0.372638	0.0209335
ENSG00000148175	-0.221581	0.010026
ENSG00000148450	-0.12089	0.0210066
ENSG00000148484	-0.334529	0.000125149
ENSG00000148516	-0.293871	0.0296057
ENSG00000148660	-0.269423	1.81283e-05
ENSG00000148672	-0.18019	0.0447893
ENSG00000148925	-0.294217	0.0003633
ENSG00000149196	-0.104959	0.0411364
ENSG00000149212	-0.332301	0.000961994
ENSG00000149269	-0.264536	0.0132078
ENSG00000149294	-0.14676	0.0266288
ENSG00000149346	-0.272357	0.0197585
ENSG00000149970	-0.127403	0.0299413
ENSG00000150471	-0.197232	0.0499576
ENSG00000150540	-0.203969	0.0330202
ENSG00000150681	-0.16902	0.0118977
ENSG00000150961	-0.220164	0.0476275
ENSG00000150977	0.363501	0.000711988
ENSG00000150995	-0.397639	0.00120963
ENSG00000151065	-0.131251	0.0340615
ENSG00000151150	-0.183022	0.0340615
ENSG00000151229	-0.28434	0.0413691
ENSG00000151413	-0.288098	0.00604772
ENSG00000151461	-0.216542	0.0325756
ENSG00000151466	-0.329252	0.0125758
ENSG00000151552	-0.145655	0.00392108
ENSG00000151665	-0.141732	0.0483507
ENSG00000151702	-0.408036	0.00474377
ENSG00000151726	0.647789	0.0106037
ENSG00000151746	-0.347636	0.00195925
ENSG00000151883	-0.325277	0.0272496
ENSG00000151893	-0.24253	0.027118
ENSG00000152104	-0.178632	0.0252896
ENSG00000152229	0.613367	0.00072908
ENSG00000152270	-0.457951	0.0250179
ENSG00000152315	-0.360862	0.0267919
ENSG00000152377	-0.205199	4.46959e-06
ENSG00000152422	-0.278559	0.0142888
ENSG00000152465	-0.111506	0.00559171
ENSG00000152492	-0.224788	0.0272348
ENSG00000152518	-0.723591	6.44491e-08
ENSG00000152578	-0.154987	0.028906
ENSG00000152583	-0.313701	0.00525015
ENSG00000152683	-0.151783	0.0209776
ENSG00000153207	-0.206736	0.0179808
ENSG00000153208	-0.529322	0.00464769
ENSG00000153395	0.176781	0.0492437
ENSG00000153574	-0.125519	0.00623989
ENSG00000153933	-0.122185	0.00583634
ENSG00000153956	-0.124221	0.0314383
ENSG00000153989	-0.157705	0.014676
ENSG00000154122	-0.213764	0.0248341
ENSG00000154127	-0.265161	0.0447893
ENSG00000154162	-0.157142	0.00583842
ENSG00000154237	-0.423156	0.00399319
ENSG00000154274	-0.193627	0.00638849
ENSG00000154305	-0.246387	0.00032515
ENSG00000154309	-0.628547	0.000850109
ENSG00000154639	-0.193657	0.0335515
ENSG00000154721	-0.119362	0.0460458
ENSG00000154743	-0.197782	7.59093e-05
ENSG00000154889	-0.217712	1.46973e-05
ENSG00000154930	-0.146874	0.0418275
ENSG00000155085	-0.153897	0.0197585
ENSG00000155093	-0.161664	0.0301406
ENSG00000155099	-0.174925	0.00382653
ENSG00000155313	-0.326163	0.00720947
ENSG00000155465	-0.187594	0.0310199
ENSG00000155621	-0.156925	0.0492437
ENSG00000155629	0.621512	0.000158503
ENSG00000155636	-0.118555	0.00974799
ENSG00000155659	-0.359095	0.0203981
ENSG00000155846	-0.190962	0.018704
ENSG00000155886	-0.207986	8.99362e-05
ENSG00000155906	-0.159308	1.92411e-05
ENSG00000155926	-0.377941	0.00601091
ENSG00000155970	-0.226909	0.0458857
ENSG00000156110	-0.415763	0.0110588
ENSG00000156298	-0.155717	0.019377
ENSG00000156299	-0.351101	0.0239269
ENSG00000156398	-0.111573	0.0443331
ENSG00000156650	-0.202259	0.049411
ENSG00000156687	-0.197399	4.18746e-05
ENSG00000156735	-0.165685	0.00126404
ENSG00000156787	-0.161078	6.3051e-06
ENSG00000156931	-0.361221	0.00530802
ENSG00000157087	-0.146602	0.00214635
ENSG00000157152	-0.120986	0.0386398
ENSG00000157193	-0.216562	0.000754008
ENSG00000157212	-0.104525	0.0363865
ENSG00000157259	-0.210974	0.00503464
ENSG00000157388	-0.423502	0.00179298
ENSG00000157500	-0.208657	0.0191774
ENSG00000157557	0.382334	0.0230403
ENSG00000157637	-0.332976	2.907e-05
ENSG00000157782	-0.136327	0.0270215
ENSG00000157823	-0.221561	0.00319141
ENSG00000157954	-0.177004	0.0138524
ENSG00000158169	-0.192235	0.029515
ENSG00000158636	-0.212656	0.0127204
ENSG00000158813	-0.330383	0.0206343
ENSG00000158864	-0.124243	0.0464907
ENSG00000159082	-0.190363	0.0406219
ENSG00000159128	0.432801	0.00578642
ENSG00000159314	-0.253729	0.0010229
ENSG00000159388	0.461563	0.00231163
ENSG00000159461	-0.149032	0.00682815
ENSG00000159685	-0.190905	0.00594475
ENSG00000160007	-0.242643	0.0453186
ENSG00000160219	-0.257451	0.0351054
ENSG00000160310	-0.260963	0.049793
ENSG00000160888	0.326729	0.00475498
ENSG00000160908	-0.109375	0.0122994
ENSG00000161010	-0.103475	0.0356504
ENSG00000161091	-0.160152	0.0173681
ENSG00000162302	-0.125743	0.0126691
ENSG00000162378	-0.228032	0.00304969
ENSG00000162496	-0.208217	0.029515
ENSG00000162545	-0.195332	0.0409188
ENSG00000162627	-0.150706	0.00493488
ENSG00000162645	0.481055	9.85087e-05
ENSG00000162664	-0.1494	0.0419753
ENSG00000162819	-0.192701	0.0180586
ENSG00000162849	-0.198229	0.0130856
ENSG00000162869	-0.305863	0.00188182
ENSG00000162924	0.429016	0.00413255
ENSG00000162980	-0.449843	1.05565e-05
ENSG00000163006	-0.141541	0.000636046
ENSG00000163104	-0.245704	0.00546453
ENSG00000163106	-0.285593	0.000203517
ENSG00000163138	-0.139001	0.0265993
ENSG00000163161	-0.139122	0.0390395
ENSG00000163219	-0.360586	0.0268006
ENSG00000163320	-0.215496	0.00888106
ENSG00000163406	-0.220553	0.0280047
ENSG00000163491	-0.317765	0.00452182
ENSG00000163512	-0.10823	0.0343076
ENSG00000163513	-0.529014	0.000857809
ENSG00000163558	-0.149638	0.0163623
ENSG00000163563	-0.194424	0.0376783
ENSG00000163565	-0.340493	0.0293688
ENSG00000163618	-0.153795	0.0192601
ENSG00000163681	-0.30844	0.00599898
ENSG00000163683	-0.204285	0.00175795
ENSG00000163703	-0.127109	0.0428362
ENSG00000163719	0.349653	0.00638849
ENSG00000163755	-0.304665	0.00143165
ENSG00000163785	-0.192844	0.0460458
ENSG00000163875	-0.125779	0.00813385
ENSG00000163913	-0.149755	0.00766011
ENSG00000163935	-0.345837	0.00032515
ENSG00000163964	-0.206419	0.0124479
ENSG00000164024	-0.159919	0.0164782
ENSG00000164073	-0.169525	0.00475498
ENSG00000164096	-0.12451	0.0378469
ENSG00000164111	0.22884	0.0379027
ENSG00000164134	-0.251947	0.0165236
ENSG00000164144	-0.248159	0.0455494
ENSG00000164169	-0.132209	0.0234945
ENSG00000164182	-0.273985	0.00920867
ENSG00000164187	-0.201681	0.00032515
ENSG00000164209	-0.2077	0.00222212
ENSG00000164219	-0.201004	0.0205311
ENSG00000164221	-0.159051	0.00192964
ENSG00000164308	-0.144924	0.00789135
ENSG00000164347	-0.108944	0.0447893
ENSG00000164463	-0.248366	0.00319141
ENSG00000164674	-0.258357	0.0296515
ENSG00000164715	-0.110711	0.00137338
ENSG00000164751	-0.127339	0.0243219
ENSG00000164815	-0.203153	0.00533279
ENSG00000164828	-0.138504	0.0391589
ENSG00000164916	-0.231783	0.00496089
ENSG00000164944	-0.135748	0.0477776
ENSG00000164970	-0.146841	0.00537531
ENSG00000164975	-0.209858	0.000387553
ENSG00000164983	-0.560098	7.75418e-08
ENSG00000164985	-0.227944	1.83522e-05
ENSG00000164989	-0.191972	0.00028086
ENSG00000165078	-0.139897	0.0293688
ENSG00000165102	-0.175914	0.0385066
ENSG00000165138	-0.110004	0.0142717
ENSG00000165219	-0.2253	0.0239689
ENSG00000165233	-0.117356	0.00486126
ENSG00000165322	-0.304342	0.0428362
ENSG00000165424	-0.116023	0.0230513
ENSG00000165434	-0.119162	0.0110878
ENSG00000165476	-0.198172	0.0229946
ENSG00000165502	-0.137888	0.00942163
ENSG00000165533	-0.14455	0.00084443
ENSG00000165609	-0.167876	0.00318443
ENSG00000165669	-0.153668	0.0388306
ENSG00000165671	-0.260279	0.0459057
ENSG00000165675	-0.258677	0.0385066
ENSG00000165868	-0.10044	0.0492437
ENSG00000165995	-0.157502	0.0150586
ENSG00000166033	-0.316876	0.00178528
ENSG00000166035	-0.189777	0.00213309
ENSG00000166130	-0.195381	0.0106914
ENSG00000166226	-0.144433	0.00410213
ENSG00000166323	-0.122447	0.0216414
ENSG00000166387	-0.138093	0.0250179
ENSG00000166439	-0.239852	0.0048384
ENSG00000166479	-0.191195	0.0234945
ENSG00000166501	-0.428616	0.00510625
ENSG00000166557	-0.16972	0.00546453
ENSG00000166794	-0.153194	0.00748939
ENSG00000166974	-0.244387	0.00872124
ENSG00000167005	-0.114209	0.0280776
ENSG00000167081	-0.515873	0.000474883
ENSG00000167107	-0.149126	0.00200888
ENSG00000167216	-0.113946	0.0281616
ENSG00000167280	-0.151486	0.00450252
ENSG00000167291	-0.320411	0.0180052
ENSG00000167766	-0.205433	0.00272271
ENSG00000167996	0.651685	0.00200888
ENSG00000168016	-0.277627	0.00322437
ENSG00000168028	-0.187055	0.046974
ENSG00000168090	-0.106079	0.0181134
ENSG00000168096	-0.1015	0.0306479
ENSG00000168209	0.538797	0.00318443
ENSG00000168216	-0.2726	0.0112715
ENSG00000168329	-0.395906	0.00644883
ENSG00000168490	-0.146478	0.0475965
ENSG00000168538	-0.160921	0.0293688
ENSG00000168575	-0.277006	0.0060883
ENSG00000168785	-0.245966	4.24096e-05
ENSG00000168918	-0.362672	0.0272496
ENSG00000169018	-0.169553	0.00168919
ENSG00000169032	-0.240834	0.0454407
ENSG00000169087	-0.347143	0.00168919
ENSG00000169313	-0.691025	3.38291e-05
ENSG00000169372	-0.434654	0.000118402
ENSG00000169398	-0.446103	0.00271561
ENSG00000169504	0.791134	3.17258e-06
ENSG00000169570	-0.190272	0.00375777
ENSG00000169855	-0.165844	0.0477776
ENSG00000169862	-0.224481	0.0141581
ENSG00000169926	-0.108747	0.0391589
ENSG00000169933	-0.165283	0.0244629
ENSG00000170004	-0.104189	0.0464907
ENSG00000170145	-0.250959	0.0314663
ENSG00000170153	-0.393574	0.0296496
ENSG00000170266	-0.213547	0.0355807
ENSG00000170275	-0.12801	0.0204446
ENSG00000170310	-0.349657	0.00718364
ENSG00000170315	-0.195966	0.0165236
ENSG00000170322	-0.107136	0.0107894
ENSG00000170522	-0.213255	0.000455612
ENSG00000170540	-0.162267	0.045067
ENSG00000170571	-0.276186	0.00407221
ENSG00000170633	-0.162474	0.00407221
ENSG00000170776	-0.421489	0.015089
ENSG00000170873	-0.353123	0.0416588
ENSG00000170891	-0.177923	2.11736e-05
ENSG00000171044	-0.306766	0.0402537
ENSG00000171105	-0.22059	0.00239184
ENSG00000171115	-0.201531	0.00375777
ENSG00000171206	-0.11707	0.045988
ENSG00000171223	0.407881	0.000935359
ENSG00000171262	-0.104284	0.0492437
ENSG00000171488	-0.389731	0.00623989
ENSG00000171492	-0.404287	0.00577568
ENSG00000171587	-0.387415	0.0402537
ENSG00000171608	-0.240049	0.0363952
ENSG00000171659	-0.290935	0.0136256
ENSG00000171824	-0.109345	0.0125084
ENSG00000171863	-0.181409	0.0184851
ENSG00000171867	-0.22682	0.0079437
ENSG00000171914	-0.378178	0.0197473
ENSG00000171988	-0.322169	0.0215704
ENSG00000172071	-0.139564	0.0492437
ENSG00000172260	-0.270448	0.00577568
ENSG00000172264	-0.357786	0.0419602
ENSG00000172270	-0.171473	0.000823449
ENSG00000172296	-0.204453	0.0348987
ENSG00000172493	-0.320578	0.0326507
ENSG00000172667	-0.259752	0.0455494
ENSG00000172728	-0.137282	0.0351864
ENSG00000172757	-0.230239	0.0072661
ENSG00000172878	-0.138037	0.00235185
ENSG00000172888	-0.123553	0.014676
ENSG00000172954	-0.200645	0.00743287
ENSG00000172995	-0.186243	0.00181135
ENSG00000173041	-0.137732	0.0498415
ENSG00000173085	-0.125282	0.0169625
ENSG00000173214	-0.196134	0.042561
ENSG00000173230	-0.263634	0.0206639
ENSG00000173391	0.400212	0.0495385
ENSG00000173517	0.590709	0.00589769
ENSG00000173588	-0.172243	0.0419496
ENSG00000173611	-0.223222	0.0136126
ENSG00000173660	-0.201296	0.000268166
ENSG00000173852	-0.246102	1.49156e-06
ENSG00000173889	-0.298346	0.0165837
ENSG00000173905	-0.193045	0.00772118
ENSG00000173950	-0.159562	0.0335273
ENSG00000174231	-0.175024	0.0275018
ENSG00000174456	-0.162637	0.00545084
ENSG00000174469	-0.387303	0.00850201
ENSG00000174482	-0.157703	0.0234945
ENSG00000174720	-0.141349	0.0474025
ENSG00000174839	-0.197663	0.0492437
ENSG00000175048	-0.31461	0.0343076
ENSG00000175054	-0.27759	0.016495
ENSG00000175106	-0.144609	0.0435397
ENSG00000175155	-0.244949	0.00399319
ENSG00000175161	-0.286913	0.0364191
ENSG00000175193	-0.176267	0.028779
ENSG00000175354	0.394219	0.00998723
ENSG00000175497	-0.270354	0.0373803
ENSG00000175602	-0.132175	0.00545598
ENSG00000175662	-0.154919	0.0331421
ENSG00000175899	-0.448237	0.00516457
ENSG00000176225	-0.466585	0.00289181
ENSG00000176390	-0.303554	0.000574859
ENSG00000176623	-0.198876	0.00498317
ENSG00000176884	-0.24009	0.00176388
ENSG00000177119	-0.252752	0.0182065
ENSG00000177311	-0.277775	0.000806361
ENSG00000177409	-0.219225	0.00168919
ENSG00000177570	-0.411203	0.00150995
ENSG00000177707	-0.161448	0.0273252
ENSG00000177885	0.393427	0.00381012
ENSG00000178105	-0.31802	0.00742012
ENSG00000178188	-0.118493	0.00583842
ENSG00000178538	-0.274312	4.89157e-05
ENSG00000178573	-0.583376	5.92396e-06
ENSG00000178585	-0.109167	0.0134587
ENSG00000178695	-0.240072	0.0229946
ENSG00000178904	-0.197167	0.00638849
ENSG00000178951	-0.232232	0.000391099
ENSG00000178996	-0.316341	2.79664e-06
ENSG00000179104	-0.174786	0.0439155
ENSG00000179344	0.248996	0.0278682
ENSG00000179361	-0.116421	0.0277262
ENSG00000179364	-0.241973	0.00877439
ENSG00000179387	-0.127304	0.0188381
ENSG00000179454	-0.20996	1.81283e-05
ENSG00000179832	-0.154537	0.0497301
ENSG00000179833	-0.219227	0.0342411
ENSG00000179912	-0.328446	0.019377
ENSG00000179981	-0.14586	0.0126236
ENSG00000180233	-0.475449	0.000453525
ENSG00000180354	-0.205407	0.00601256
ENSG00000180530	-0.405811	0.00819225
ENSG00000180611	0.319408	0.0372529
ENSG00000180891	-0.271996	6.85084e-05
ENSG00000180917	-0.181932	0.000711988
ENSG00000181192	-0.25673	0.000453525
ENSG00000181381	-0.23852	0.0458857
ENSG00000181450	-0.177622	0.0125758
ENSG00000181481	-0.167088	0.0355807
ENSG00000181631	-0.192868	0.00503464
ENSG00000181690	-0.223244	0.0216532
ENSG00000181722	-0.378939	0.0296496
ENSG00000181826	-0.158919	0.0297188
ENSG00000181827	-0.315316	0.00464769
ENSG00000182054	-0.132465	0.0213888
ENSG00000182150	-0.206721	0.0280776
ENSG00000182158	-0.345096	0.00017831
ENSG00000182196	-0.139929	0.0297433
ENSG00000182197	-0.465063	0.000250745
ENSG00000182389	-0.542405	1.07465e-05
ENSG00000182541	0.604896	0.0015378
ENSG00000182578	-0.348882	0.0231137
ENSG00000182601	-0.47334	0.0373516
ENSG00000182621	-0.232253	0.0200791
ENSG00000182923	-0.231142	0.00748784
ENSG00000183066	-0.149838	0.0209776
ENSG00000183160	-0.140027	0.0209776
ENSG00000183230	-0.235545	0.0357156
ENSG00000183454	-0.171831	0.00845395
ENSG00000183475	-0.136584	0.0180528
ENSG00000183648	-0.108048	0.0322734
ENSG00000183715	-0.244617	0.0481251
ENSG00000183775	-0.151956	0.0129087
ENSG00000184005	-1.31868	3.70019e-14
ENSG00000184014	0.526529	0.000466427
ENSG00000184060	-0.372487	0.00136382
ENSG00000184083	-0.150462	0.0222313
ENSG00000184277	-0.139818	0.0111035
ENSG00000184408	-0.190646	0.00137557
ENSG00000184574	-0.208884	0.0182065
ENSG00000184588	0.623599	0.00104526
ENSG00000184719	-0.256525	0.00272387
ENSG00000184939	-0.149522	0.00476999
ENSG00000184992	-0.13449	0.0364191
ENSG00000185046	-0.285431	0.0113181
ENSG00000185049	-0.152022	0.00319141
ENSG00000185129	-0.234991	0.00673481
ENSG00000185215	0.445349	0.00106441
ENSG00000185261	-0.228326	0.015063
ENSG00000185274	-0.110778	0.0436648
ENSG00000185420	-0.372793	0.0360489
ENSG00000185477	-0.370959	0.00545084
ENSG00000185513	-0.117245	0.00679302
ENSG00000185658	-0.255188	0.0359349
ENSG00000185774	-0.414704	0.0423633
ENSG00000185883	-0.218483	0.0311201
ENSG00000185950	-0.287625	0.0351054
ENSG00000185963	-0.160292	0.0243756
ENSG00000185973	-0.293637	0.000574859
ENSG00000186063	-0.387015	0.000140988
ENSG00000186094	-0.168903	0.0364414
ENSG00000186376	-0.195639	0.0385066
ENSG00000186417	-0.570605	0.00437399
ENSG00000186469	-0.302931	0.00168919
ENSG00000186472	-0.202951	0.0197585
ENSG00000186532	-0.152653	0.00779811
ENSG00000186635	0.248117	0.0476275
ENSG00000186660	-0.17551	0.0280047
ENSG00000186716	-0.103473	0.00930046
ENSG00000186868	-0.123354	0.0395683
ENSG00000187118	-0.213229	0.0296496
ENSG00000187257	-0.22898	0.0178736
ENSG00000187609	-0.146144	0.0128891
ENSG00000187672	-0.387724	0.0234945
ENSG00000187715	-0.364091	0.00250968
ENSG00000187764	-0.395956	4.24096e-05
ENSG00000187790	-0.126367	0.000972106
ENSG00000188177	-0.206526	0.00978498
ENSG00000188191	-0.133456	0.0275266
ENSG00000188313	0.298769	0.0269256
ENSG00000188419	-0.20509	0.0197659
ENSG00000188735	-0.114289	0.0483204
ENSG00000188747	-0.106824	2.907e-05
ENSG00000188921	-0.15129	0.0266508
ENSG00000189067	0.307118	0.0269256
ENSG00000189241	-0.222711	0.000453525
ENSG00000189308	-0.184053	0.00718364
ENSG00000196151	-0.174115	0.0220563
ENSG00000196218	-0.299539	0.0378469
ENSG00000196227	-0.106918	0.0277797
ENSG00000196323	-0.224283	0.00322437
ENSG00000196440	-0.221217	0.0214512
ENSG00000196455	-0.137115	0.00374373
ENSG00000196510	-0.118405	0.0378469
ENSG00000196531	-0.203296	0.049793
ENSG00000196597	-0.254091	0.000290329
ENSG00000196605	-0.332579	0.00392108
ENSG00000196693	-0.164832	0.0213888
ENSG00000196735	0.390467	0.00141292
ENSG00000196914	-0.228325	0.0402537
ENSG00000196950	-0.310539	0.00407221
ENSG00000197024	-0.144531	0.014039
ENSG00000197093	-0.133617	0.0229946
ENSG00000197520	-0.344589	0.00239184
ENSG00000197580	-0.172181	0.0351054
ENSG00000197601	-0.278569	0.0142172
ENSG00000197965	-0.51481	3.21479e-05
ENSG00000197969	-0.20995	0.0024086
ENSG00000198015	-0.149109	9.92864e-06
ENSG00000198053	0.274177	0.0388306
ENSG00000198089	-0.125832	0.00353058
ENSG00000198162	-0.298442	0.00968638
ENSG00000198189	-0.28335	2.04217e-05
ENSG00000198198	-0.132107	0.0334549
ENSG00000198286	-0.396173	0.00153729
ENSG00000198380	-0.168261	0.0338014
ENSG00000198420	-0.137251	0.0178736
ENSG00000198589	-0.349384	0.0187385
ENSG00000198604	0.495391	0.00323214
ENSG00000198668	-0.294302	0.0318689
ENSG00000198673	-0.214911	0.0205311
ENSG00000198718	-0.244738	0.00153729
ENSG00000198771	-0.375159	0.012229
ENSG00000198791	-0.238838	5.61295e-10
ENSG00000198814	0.334287	0.0448558
ENSG00000198836	-0.229429	0.0250381
ENSG00000198879	-0.535236	0.0106494
ENSG00000203879	-0.174213	0.00464769
ENSG00000204138	-0.237114	0.0386359
ENSG00000204287	0.32284	0.0460458
ENSG00000205268	-0.233789	0.026612
ENSG00000205269	-0.188172	0.00789135
ENSG00000205336	-0.375605	0.00736461
ENSG00000205581	-0.187302	0.02885
ENSG00000205659	-0.229728	0.00193858
ENSG00000211456	-0.222395	0.0273252
ENSG00000213918	-0.170309	0.00396392
ENSG00000213988	-0.114702	0.0294557
ENSG00000214013	-0.209364	0.0363865
ENSG00000214954	-0.22992	0.00200888
ENSG00000215193	-0.148343	0.0003633
ENSG00000216937	-0.267086	0.0187766
ENSG00000217555	-0.31327	0.00272271
ENSG00000219626	-0.192839	0.0415553
ENSG00000222009	0.169039	0.0487708
ENSG00000226124	-0.218507	0.0118325
ENSG00000232119	-0.111486	0.0263187
ENSG00000234127	-0.1133	0.0231364
ENSG00000240230	-0.129464	0.048287
ENSG00000241399	-0.299489	0.00082626
ENSG00000241973	-0.20729	0.0480026
ENSG00000243317	-0.133175	0.0236867
ENSG00000249437	-0.316611	0.041067
ENSG00000250312	-0.283824	0.000818233
ENSG00000254087	0.547576	0.00242425
ENSG00000255302	-0.120846	0.0440419
ENSG00000256525	-0.118526	0.00475498
ENSG00000261609	-0.152214	0.00319996
ENSG00000265972	-0.300955	0.0203981
ENSG00000266094	0.54552	0.000701697
ENSG00000266472	-0.133072	0.0063235
ENSG00000272325	-0.168869	0.0399089
ENSG00000275835	-0.128757	0.015063
ENSG00000278540	-0.255942	0.0228638

## Sheet: Macrophage vs HM
AD group				Normal group				PART group				Resilience group
ENSEMBL ID	log2FC	FDR		ENSEMBL ID	log2FC	FDR		ENSEMBL ID	log2FC	FDR		ENSEMBL ID	log2FC	FDR
ENSG00000001461	-0.16463	4.25693e-23		ENSG00000001461	-0.150794	1.3399e-08		ENSG00000001461	-0.124707	0.000836181		ENSG00000001461	-0.132758	0.0102217
ENSG00000002549	-0.15323	0.000412085		ENSG00000002549	-0.182709	0.0178318		ENSG00000003147	0.260934	0.000187651		ENSG00000004399	0.291924	0.00728299
ENSG00000003147	0.121939	0.00143118		ENSG00000003147	0.188811	0.00100922		ENSG00000003402	0.225782	0.0120637		ENSG00000004866	0.196669	0.0227895
ENSG00000003402	0.179783	0.000400716		ENSG00000004399	0.562434	1.6332e-21		ENSG00000004399	0.555232	8.42467e-16		ENSG00000005810	-0.23342	0.0346204
ENSG00000004399	0.543826	8.31149e-37		ENSG00000004455	-0.147299	5.23348e-07		ENSG00000004864	0.197789	0.048533		ENSG00000005844	-0.39167	1.1191e-26
ENSG00000004766	0.123377	0.00546693		ENSG00000004799	0.205496	0.0374384		ENSG00000004866	0.202448	0.000601817		ENSG00000006747	-0.691225	1.53016e-09
ENSG00000004799	0.387376	1.74222e-07		ENSG00000004864	0.233947	0.00216374		ENSG00000005249	0.156187	0.00257392		ENSG00000007237	0.456471	4.88033e-05
ENSG00000004864	0.299037	2.03616e-10		ENSG00000004866	0.2714	4.63502e-06		ENSG00000005810	-0.261948	0.00618986		ENSG00000007923	-0.158606	0.00961773
ENSG00000004866	0.293135	6.78869e-17		ENSG00000005249	0.113191	0.00243374		ENSG00000005844	-0.282587	4.43609e-11		ENSG00000008083	0.403404	0.00112622
ENSG00000005020	-0.168714	0.0147758		ENSG00000005810	-0.233431	0.00439294		ENSG00000006576	0.196692	0.0108467		ENSG00000008256	-0.273449	0.00052548
ENSG00000005249	0.147396	2.50178e-08		ENSG00000005844	-0.28599	7.40946e-14		ENSG00000006747	-0.645232	8.83375e-12		ENSG00000008869	-0.357322	0.000119782
ENSG00000005810	-0.202382	0.000215478		ENSG00000006576	0.151128	0.0371047		ENSG00000007129	-0.104935	0.00571841		ENSG00000009950	-0.535131	5.03916e-12
ENSG00000005844	-0.288668	6.09538e-39		ENSG00000006747	-0.598112	5.97537e-10		ENSG00000007237	0.726889	9.40051e-16		ENSG00000010327	0.819516	1.04621e-08
ENSG00000006459	0.144108	0.000771007		ENSG00000007129	-0.16628	3.00269e-06		ENSG00000008083	0.835244	1.10209e-18		ENSG00000010610	-0.246589	0.00161918
ENSG00000006576	0.159605	0.000317994		ENSG00000007237	0.703961	1.07184e-16		ENSG00000008086	0.144789	0.0341649		ENSG00000011201	-0.632326	1.90869e-11
ENSG00000006747	-0.739625	2.03424e-45		ENSG00000008083	0.621767	3.89695e-15		ENSG00000008294	0.200415	0.00995336		ENSG00000012779	-0.288117	0.0336941
ENSG00000007129	-0.131012	5.48318e-08		ENSG00000008256	-0.22521	0.000112007		ENSG00000008311	-0.121709	2.75011e-05		ENSG00000017260	-0.589268	4.46816e-06
ENSG00000007237	0.689563	4.01541e-37		ENSG00000008294	0.19489	0.00279759		ENSG00000008513	0.400785	5.29854e-07		ENSG00000018189	0.283554	0.0272227
ENSG00000008083	0.766376	8.77365e-42		ENSG00000008513	0.426707	5.07705e-08		ENSG00000008869	-0.313979	1.44956e-05		ENSG00000019485	-0.284718	5.06757e-06
ENSG00000008256	-0.223699	6.47509e-13		ENSG00000008869	-0.42892	1.51581e-11		ENSG00000008988	-0.211621	0.00116132		ENSG00000019582	-0.620946	2.01404e-05
ENSG00000008294	0.227412	1.436e-07		ENSG00000009950	-0.538488	3.83555e-33		ENSG00000009950	-0.566881	1.13295e-38		ENSG00000023892	-0.309025	1.01461e-07
ENSG00000008513	0.392808	3.12243e-16		ENSG00000010017	-0.355735	4.03084e-08		ENSG00000010017	-0.35504	4.39188e-06		ENSG00000023902	-0.209516	0.0129585
ENSG00000008869	-0.340903	1.08406e-17		ENSG00000010327	1.07862	1.30654e-36		ENSG00000010327	1.17092	1.33409e-34		ENSG00000026297	-0.960747	6.85622e-10
ENSG00000008988	-0.125628	0.000660425		ENSG00000010610	-0.235177	1.59148e-05		ENSG00000010404	-0.313741	0.00713494		ENSG00000027075	-0.305447	0.014348
ENSG00000009413	0.11784	0.0174533		ENSG00000010671	-0.123927	0.00909799		ENSG00000010610	-0.236256	0.000488859		ENSG00000027697	-0.634688	7.07355e-12
ENSG00000009950	-0.49809	4.08513e-74		ENSG00000011114	-0.15572	0.0499002		ENSG00000010818	0.168435	0.0410611		ENSG00000028277	-0.628213	2.63062e-08
ENSG00000010017	-0.311736	4.90387e-14		ENSG00000011201	-0.871416	2.99112e-49		ENSG00000011201	-0.809851	4.99982e-37		ENSG00000030419	-0.305013	0.000222551
ENSG00000010327	0.989824	2.2276e-76		ENSG00000011405	0.185302	0.00571179		ENSG00000012061	-0.137126	3.34203e-06		ENSG00000031081	-0.262944	0.0296799
ENSG00000010404	-0.169934	0.0100512		ENSG00000011422	0.199293	0.00304662		ENSG00000012660	-0.177637	0.0178		ENSG00000033030	-0.141271	0.00182414
ENSG00000010610	-0.140031	5.35431e-05		ENSG00000012061	-0.137455	6.10263e-06		ENSG00000012779	-0.412772	0.000194231		ENSG00000034053	-0.140662	0.0192834
ENSG00000010803	-0.135362	0.0021183		ENSG00000012779	-0.464373	5.53853e-07		ENSG00000017260	-0.610488	1.38427e-10		ENSG00000035928	-0.127445	0.0408639
ENSG00000010818	0.142119	0.00662345		ENSG00000015676	-0.126147	0.0455084		ENSG00000018189	0.280899	0.000822651		ENSG00000038274	-0.101726	0.0341992
ENSG00000011201	-0.857836	9.87837e-123		ENSG00000017260	-0.64294	1.16342e-17		ENSG00000019485	-0.362023	6.5003e-15		ENSG00000038945	0.655233	0.000294285
ENSG00000011405	0.15624	5.99096e-05		ENSG00000018189	0.333689	3.60385e-05		ENSG00000019582	-0.808244	3.00466e-20		ENSG00000039319	0.2858	0.0063704
ENSG00000011422	0.152485	9.68078e-06		ENSG00000018280	-0.294875	0.0419439		ENSG00000019991	0.177624	0.000484872		ENSG00000040531	-0.122595	2.30967e-05
ENSG00000011454	0.238562	4.34643e-08		ENSG00000019485	-0.300925	8.9785e-09		ENSG00000020577	0.516733	4.13649e-07		ENSG00000042980	-1.06236	1.23746e-15
ENSG00000012779	-0.292827	2.78792e-07		ENSG00000019582	-0.470181	0.00202368		ENSG00000022277	-0.15581	0.00180473		ENSG00000044459	0.24166	0.0471993
ENSG00000013523	-0.115539	2.79471e-07		ENSG00000020577	0.370503	8.51082e-05		ENSG00000022567	0.240766	0.00158476		ENSG00000047365	0.497888	1.33147e-05
ENSG00000014164	0.113858	2.5908e-05		ENSG00000022567	0.146579	0.0233511		ENSG00000023697	0.308876	5.59315e-05		ENSG00000051108	0.426226	0.00420669
ENSG00000017260	-0.538542	2.66214e-26		ENSG00000023516	-0.177094	0.00179273		ENSG00000023892	-0.235504	8.80937e-07		ENSG00000051523	-0.276901	0.00220961
ENSG00000018189	0.420089	2.07573e-21		ENSG00000023697	0.188852	0.00126828		ENSG00000023902	-0.169125	0.00408452		ENSG00000051825	-0.164513	0.00269964
ENSG00000018280	-0.196361	0.0318093		ENSG00000023892	-0.27994	1.00389e-11		ENSG00000026297	-0.859429	5.37947e-12		ENSG00000053254	-0.563612	3.5498e-07
ENSG00000019485	-0.314218	9.85392e-36		ENSG00000023902	-0.210633	0.000522118		ENSG00000027075	-0.445683	1.16171e-09		ENSG00000053524	-0.427308	3.51743e-07
ENSG00000019582	-0.511789	2.60052e-17		ENSG00000025796	0.151209	0.0429422		ENSG00000027697	-0.603556	6.0467e-15		ENSG00000054965	-0.386913	0.00262409
ENSG00000019991	0.110521	3.10696e-05		ENSG00000026297	-0.67523	8.95255e-10		ENSG00000028277	-0.536013	2.02915e-10		ENSG00000055130	-0.467165	2.63569e-07
ENSG00000020577	0.358126	3.39805e-10		ENSG00000027075	-0.462149	8.43368e-11		ENSG00000030419	-0.249002	0.000823018		ENSG00000055208	-0.602974	1.92559e-07
ENSG00000022567	0.2631	1.06855e-12		ENSG00000027697	-0.669951	5.26354e-21		ENSG00000033627	0.23065	0.00641976		ENSG00000055483	0.304856	0.0272315
ENSG00000023318	0.195741	3.37536e-05		ENSG00000028116	-0.178616	0.00957271		ENSG00000034053	-0.17328	5.83394e-07		ENSG00000057704	-0.33512	0.00024342
ENSG00000023697	0.27329	1.25274e-11		ENSG00000028277	-0.652819	1.25876e-20		ENSG00000034510	-0.229866	0.024385		ENSG00000060749	-0.245405	0.00540631
ENSG00000023892	-0.254932	2.39102e-27		ENSG00000030419	-0.322946	3.38947e-08		ENSG00000035403	-0.167775	3.99557e-07		ENSG00000060982	0.439047	5.18203e-05
ENSG00000023902	-0.167181	1.34786e-07		ENSG00000031081	-0.263317	0.00223458		ENSG00000037637	0.166223	0.0451124		ENSG00000061794	-0.106634	0.04442
ENSG00000025796	0.136361	0.00147209		ENSG00000033627	0.161656	0.0493222		ENSG00000038945	0.871362	4.90571e-13		ENSG00000062716	0.639827	5.98279e-06
ENSG00000026297	-1.03056	3.14312e-44		ENSG00000034053	-0.201006	5.3127e-07		ENSG00000039319	0.287167	3.35805e-05		ENSG00000063176	-0.101559	0.0049062
ENSG00000027075	-0.456792	9.83422e-23		ENSG00000034510	-0.301804	0.00167585		ENSG00000042317	0.173345	0.000529121		ENSG00000063854	-0.141369	0.0103595
ENSG00000027697	-0.56578	1.9433e-32		ENSG00000034677	0.137581	0.0470198		ENSG00000042980	-1.03995	1.63548e-26		ENSG00000064012	-0.15911	0.00815639
ENSG00000028137	0.252315	1.27635e-05		ENSG00000035403	-0.171671	7.274e-10		ENSG00000043462	0.224263	0.0403306		ENSG00000064225	-0.314813	0.00467528
ENSG00000028277	-0.666438	8.06593e-51		ENSG00000038219	-0.177761	0.00759747		ENSG00000043514	-0.130301	0.000475641		ENSG00000064393	-0.256114	0.0104583
ENSG00000029725	0.133181	0.0082912		ENSG00000038945	0.761008	1.39229e-10		ENSG00000044459	0.372334	7.43544e-06		ENSG00000064652	0.295354	0.0252644
ENSG00000030419	-0.246702	2.92613e-08		ENSG00000039319	0.27659	5.67402e-05		ENSG00000046651	-0.188126	6.49414e-05		ENSG00000065150	-0.109305	0.0409602
ENSG00000031081	-0.131845	0.0157382		ENSG00000042317	0.104479	0.00863289		ENSG00000046653	-0.153005	0.035986		ENSG00000065413	-0.779181	6.95444e-09
ENSG00000032219	0.105081	0.0114137		ENSG00000042980	-1.09152	1.29729e-37		ENSG00000047365	0.850759	1.80818e-26		ENSG00000065882	-0.60856	8.86947e-08
ENSG00000033627	0.264755	1.73822e-10		ENSG00000043462	0.184312	0.0423878		ENSG00000048392	-0.156701	0.000680415		ENSG00000065911	-0.197027	0.000550521
ENSG00000033800	0.163348	0.00286977		ENSG00000047365	0.779178	1.01966e-22		ENSG00000049759	-0.276816	0.00906871		ENSG00000066084	-0.379817	0.0156574
ENSG00000034053	-0.161788	8.86286e-19		ENSG00000048392	-0.168711	9.42884e-06		ENSG00000050748	-0.161334	0.000487217		ENSG00000066294	-0.216533	0.0309864
ENSG00000034510	-0.253746	3.31896e-07		ENSG00000049759	-0.21912	0.0180846		ENSG00000051108	0.301494	0.00267154		ENSG00000067057	-0.2027	9.33956e-05
ENSG00000034677	0.130812	0.000393191		ENSG00000050030	-0.117088	0.00810878		ENSG00000051523	-0.284919	1.13019e-05		ENSG00000067113	-0.441381	1.21145e-11
ENSG00000035403	-0.1458	5.63145e-15		ENSG00000050438	-0.168906	0.000941026		ENSG00000051825	-0.154221	0.000504543		ENSG00000067798	-1.98466	1.65086e-49
ENSG00000035862	0.148461	0.000471955		ENSG00000051108	0.42603	2.98851e-05		ENSG00000052126	0.259194	0.00186836		ENSG00000068305	-0.629702	5.8024e-06
ENSG00000038219	-0.215945	3.34977e-10		ENSG00000051523	-0.230419	0.00176876		ENSG00000052795	0.314751	0.000807936		ENSG00000068366	-0.315029	0.00487631
ENSG00000038532	-0.126042	0.00328485		ENSG00000051825	-0.131547	0.00235821		ENSG00000053254	-0.518556	3.98829e-06		ENSG00000068650	-0.265738	0.0455477
ENSG00000038945	0.855474	2.50137e-36		ENSG00000052126	0.219211	0.0039732		ENSG00000053524	-0.534676	3.35023e-30		ENSG00000068724	-0.657536	1.80805e-10
ENSG00000039319	0.270373	1.293e-11		ENSG00000052795	0.247791	0.0128347		ENSG00000054282	-0.278329	0.0112477		ENSG00000068784	0.303093	0.0049062
ENSG00000040933	0.129697	0.0174481		ENSG00000053254	-0.370253	0.00035858		ENSG00000054523	0.290939	9.98826e-05		ENSG00000069424	0.209794	0.00391762
ENSG00000042980	-1.00244	1.832e-68		ENSG00000053524	-0.350265	2.5795e-10		ENSG00000054611	-0.257189	0.0165185		ENSG00000069849	0.313544	0.0420486
ENSG00000043093	0.104953	0.00259436		ENSG00000054282	-0.371695	1.12138e-05		ENSG00000054965	-0.53373	1.40862e-08		ENSG00000070018	-0.12922	0.0272782
ENSG00000044459	0.297202	1.0567e-08		ENSG00000054523	0.282858	1.97184e-05		ENSG00000055130	-0.379705	1.78467e-07		ENSG00000070190	-0.175878	2.02218e-05
ENSG00000046651	-0.103233	0.00030534		ENSG00000054611	-0.282245	0.00120327		ENSG00000055163	-0.113352	0.00112049		ENSG00000070759	0.153483	0.0317843
ENSG00000047365	0.754968	3.06266e-52		ENSG00000054965	-0.483524	4.80272e-09		ENSG00000055208	-0.525353	2.80268e-07		ENSG00000071051	-1.04497	5.77789e-13
ENSG00000047849	0.12191	0.0115594		ENSG00000054983	0.105572	0.0492054		ENSG00000055332	0.203796	0.0162314		ENSG00000071054	-0.529842	1.79989e-06
ENSG00000048052	-0.322065	0.000141226		ENSG00000055130	-0.38131	9.07805e-08		ENSG00000055483	0.354324	3.77405e-06		ENSG00000071073	-0.537056	8.50517e-07
ENSG00000048392	-0.136849	6.07774e-08		ENSG00000055208	-0.502081	5.34607e-08		ENSG00000055917	0.180931	0.0268302		ENSG00000071242	-0.548166	5.33163e-05
ENSG00000048405	0.126572	0.00565218		ENSG00000055483	0.373786	3.86913e-07		ENSG00000057019	0.124644	0.0188254		ENSG00000071246	-0.449923	6.68652e-09
ENSG00000048991	-0.105022	0.0266329		ENSG00000057704	-0.362312	4.62541e-08		ENSG00000057704	-0.353583	2.21055e-07		ENSG00000071655	-0.115334	0.00175533
ENSG00000049618	0.14461	0.0136738		ENSG00000057935	-0.15285	0.00212709		ENSG00000057935	-0.121124	0.0465519		ENSG00000072274	0.594017	0.000611653
ENSG00000049759	-0.23374	1.14674e-05		ENSG00000058091	0.45008	5.89836e-12		ENSG00000058091	0.344875	9.14344e-10		ENSG00000072422	0.23143	0.00976344
ENSG00000050438	-0.133469	8.60206e-07		ENSG00000058404	-0.102774	0.00928965		ENSG00000059378	0.136748	0.0184657		ENSG00000073331	-0.366226	0.00551493
ENSG00000051108	0.323789	2.72795e-09		ENSG00000059377	-0.323204	0.000105354		ENSG00000059728	0.127306	0.0154385		ENSG00000073849	-1.29762	4.7666e-21
ENSG00000051523	-0.219577	1.24981e-09		ENSG00000059378	0.161991	0.000891737		ENSG00000060982	0.44024	5.53418e-07		ENSG00000073921	-0.564439	4.99696e-05
ENSG00000052126	0.137039	0.00575381		ENSG00000059728	0.175458	0.00409858		ENSG00000062716	0.838463	7.6623e-16		ENSG00000074266	-0.139223	0.0172979
ENSG00000052795	0.237703	0.000124959		ENSG00000060237	-0.208622	0.00982399		ENSG00000063177	-0.162852	0.0263764		ENSG00000074590	-0.465816	6.53948e-08
ENSG00000053254	-0.482173	1.22817e-14		ENSG00000060982	0.396019	1.81553e-07		ENSG00000063601	-0.106206	0.0304271		ENSG00000074657	0.244292	0.00682832
ENSG00000053524	-0.37258	5.78503e-40		ENSG00000061273	-0.129217	0.0052714		ENSG00000064225	-0.27357	0.000529008		ENSG00000074696	-0.128603	0.017454
ENSG00000054282	-0.273219	2.90156e-06		ENSG00000062716	0.711773	1.33989e-14		ENSG00000064393	-0.225854	0.00977103		ENSG00000074706	-1.75006	3.03382e-48
ENSG00000054523	0.316352	5.47527e-14		ENSG00000063601	-0.154202	0.000609243		ENSG00000064652	0.318188	0.000197503		ENSG00000074964	0.234364	0.0488277
ENSG00000054611	-0.290252	1.42319e-07		ENSG00000064225	-0.216293	0.0112884		ENSG00000064726	-0.148141	0.00888766		ENSG00000075239	-0.159666	1.17183e-05
ENSG00000054965	-0.426415	1.85124e-16		ENSG00000064393	-0.298286	2.60846e-07		ENSG00000065243	-0.235071	0.0120056		ENSG00000075240	0.180921	0.0121936
ENSG00000055130	-0.193858	6.67247e-06		ENSG00000064419	-0.117761	0.0493059		ENSG00000065357	-0.126539	0.000126667		ENSG00000075391	-0.699277	2.38247e-09
ENSG00000055208	-0.471091	5.35276e-19		ENSG00000064652	0.239786	0.0039732		ENSG00000065413	-0.750693	1.88631e-13		ENSG00000075420	0.577039	4.81279e-05
ENSG00000055332	0.168648	1.87659e-05		ENSG00000065243	-0.468315	4.4007e-10		ENSG00000065882	-0.500665	1.66088e-09		ENSG00000075618	-0.242855	0.00763366
ENSG00000055483	0.384311	1.67599e-18		ENSG00000065413	-0.898598	6.60623e-19		ENSG00000065911	-0.23403	5.41996e-07		ENSG00000075624	-0.436914	0.000701737
ENSG00000055609	0.183464	0.000348422		ENSG00000065882	-0.48169	2.70846e-10		ENSG00000066933	0.290612	2.14218e-05		ENSG00000075651	-0.357028	0.000415207
ENSG00000056586	0.137632	4.82229e-05		ENSG00000065911	-0.243287	5.61458e-10		ENSG00000067057	-0.201677	2.71415e-08		ENSG00000076356	-0.130383	0.020626
ENSG00000057019	0.107751	1.08184e-05		ENSG00000066084	-0.246315	0.00849884		ENSG00000067113	-0.461335	7.91449e-38		ENSG00000076641	-0.650289	1.90472e-06
ENSG00000057657	0.131587	0.000643942		ENSG00000066294	-0.149831	0.0413064		ENSG00000067798	-2.21352	1.399e-135		ENSG00000076928	-0.176265	0.0158597
ENSG00000057704	-0.324051	7.3911e-17		ENSG00000067057	-0.184874	1.77069e-07		ENSG00000067900	0.334281	0.00091527		ENSG00000077044	0.213979	0.0434245
ENSG00000057935	-0.143335	3.67543e-07		ENSG00000067113	-0.493508	4.24643e-31		ENSG00000068305	-0.733051	9.80915e-15		ENSG00000077063	-0.52702	1.79791e-05
ENSG00000058091	0.308487	2.01131e-17		ENSG00000067798	-2.38536	1.98962e-140		ENSG00000068366	-0.246163	0.000582626		ENSG00000077238	-0.323257	0.00699758
ENSG00000058272	0.159346	0.00237405		ENSG00000067900	0.223145	0.00439497		ENSG00000068383	0.100694	0.0408749		ENSG00000077254	-0.179834	0.0284997
ENSG00000059377	-0.217397	0.000427418		ENSG00000068028	0.107092	0.0428109		ENSG00000068724	-0.746536	2.35844e-22		ENSG00000077420	-1.42768	1.29585e-27
ENSG00000059378	0.14109	7.77718e-07		ENSG00000068305	-0.528358	2.30274e-09		ENSG00000068784	0.219886	0.0325847		ENSG00000077549	-0.425836	0.000493863
ENSG00000059728	0.17667	1.20591e-07		ENSG00000068366	-0.218244	0.0021994		ENSG00000068796	-0.17637	0.00922958		ENSG00000078237	-0.270001	0.000234475
ENSG00000059804	-0.166092	0.0199707		ENSG00000068724	-0.648671	1.58928e-16		ENSG00000069424	0.231104	7.78153e-06		ENSG00000079156	-0.451798	2.59245e-21
ENSG00000060982	0.345602	3.1969e-12		ENSG00000068784	0.281248	8.26469e-05		ENSG00000069493	0.17332	0.0337951		ENSG00000079263	-0.340258	2.76304e-09
ENSG00000062716	0.655058	3.94003e-32		ENSG00000068796	-0.169839	0.00358871		ENSG00000069849	0.39365	5.48414e-05		ENSG00000079277	-0.338754	0.00581245
ENSG00000063177	-0.10823	0.00893445		ENSG00000069424	0.304177	1.70445e-10		ENSG00000069956	0.137554	0.00200435		ENSG00000079785	-0.110905	0.0487492
ENSG00000064225	-0.2856	3.10722e-11		ENSG00000069849	0.42326	1.60727e-07		ENSG00000070190	-0.120251	0.00245902		ENSG00000079819	-1.31063	8.90003e-22
ENSG00000064393	-0.105286	0.0204794		ENSG00000069956	0.166432	0.000101024		ENSG00000070718	-0.106262	0.00011134		ENSG00000080298	-0.29691	0.0099458
ENSG00000064652	0.16562	0.000929035		ENSG00000070018	-0.143868	0.000177392		ENSG00000070756	-0.198834	0.0424978		ENSG00000081014	-0.150969	0.018749
ENSG00000064726	-0.112393	0.00102369		ENSG00000070190	-0.14346	0.000150121		ENSG00000070759	0.377032	1.90464e-09		ENSG00000081189	-0.438271	2.08404e-05
ENSG00000065243	-0.283786	2.36129e-08		ENSG00000070759	0.144661	0.00583371		ENSG00000071051	-0.958041	2.69876e-18		ENSG00000081237	-0.402021	0.00856493
ENSG00000065413	-0.680146	7.50637e-35		ENSG00000070785	-0.155368	0.0174493		ENSG00000071054	-0.709187	7.44239e-16		ENSG00000081320	0.416543	7.24571e-06
ENSG00000065882	-0.494285	1.41588e-23		ENSG00000070808	-0.129439	0.0335249		ENSG00000071073	-0.43701	0.000119482		ENSG00000081377	-0.232727	0.0156574
ENSG00000065911	-0.178736	1.58611e-12		ENSG00000071051	-0.981581	2.05734e-23		ENSG00000071082	-0.145777	0.0435528		ENSG00000081923	-0.181477	0.0099458
ENSG00000066084	-0.195484	0.00126129		ENSG00000071054	-0.663175	2.74614e-15		ENSG00000071242	-0.351806	0.00119309		ENSG00000082074	-0.964986	3.5811e-12
ENSG00000066294	-0.166888	4.98145e-06		ENSG00000071073	-0.466724	1.14635e-06		ENSG00000071246	-0.613941	1.40738e-42		ENSG00000082212	-0.202765	0.0327131
ENSG00000066777	0.107268	0.02511		ENSG00000071242	-0.594679	1.79448e-12		ENSG00000071794	-0.133318	0.00387743		ENSG00000082269	-0.544129	3.51047e-06
ENSG00000066933	0.263717	7.51263e-11		ENSG00000071246	-0.630188	4.97898e-36		ENSG00000072121	0.127925	0.00381257		ENSG00000082397	0.661212	0.000350363
ENSG00000067057	-0.207796	9.65822e-22		ENSG00000072121	0.132001	0.000768899		ENSG00000072135	-0.142957	0.0399432		ENSG00000082996	0.411318	0.000124837
ENSG00000067066	-0.21057	0.000504172		ENSG00000072274	0.351739	6.79784e-06		ENSG00000072274	0.449822	7.92451e-05		ENSG00000084090	-0.148975	0.0185127
ENSG00000067082	0.134439	0.00219072		ENSG00000072364	0.179084	0.0172376		ENSG00000072364	0.205686	0.00663907		ENSG00000084112	-0.36416	0.000372632
ENSG00000067113	-0.428388	2.17897e-64		ENSG00000072422	0.261729	6.48756e-07		ENSG00000072422	0.24405	4.42689e-05		ENSG00000084731	-0.178956	0.0160177
ENSG00000067798	-2.08882	9.18635e-282		ENSG00000072786	0.209727	0.00909154		ENSG00000072786	0.209738	0.0297191		ENSG00000084754	-0.163987	0.0128334
ENSG00000067900	0.360152	2.60958e-14		ENSG00000073060	-0.144453	0.0212875		ENSG00000073331	-0.36698	0.000309721		ENSG00000085491	0.153197	0.0389428
ENSG00000068024	-0.202991	0.000224929		ENSG00000073331	-0.417854	2.16497e-07		ENSG00000073803	-0.167037	0.000347376		ENSG00000085832	0.605479	3.54893e-08
ENSG00000068305	-0.579652	4.39588e-26		ENSG00000073803	-0.117068	0.0208621		ENSG00000073849	-1.39469	9.06088e-38		ENSG00000086730	-0.54708	8.38174e-09
ENSG00000068366	-0.233973	2.10643e-08		ENSG00000073849	-1.4048	1.25524e-55		ENSG00000073921	-0.384449	0.00044266		ENSG00000087086	-0.466294	0.0123879
ENSG00000068724	-0.650055	1.64894e-43		ENSG00000073921	-0.316485	0.000748829		ENSG00000074266	-0.161866	0.00069059		ENSG00000087253	-0.871322	8.68872e-15
ENSG00000068784	0.246238	6.18544e-07		ENSG00000074201	-0.102986	0.0367423		ENSG00000074590	-0.461491	8.08286e-16		ENSG00000088179	-0.163481	0.0465135
ENSG00000068796	-0.192869	2.39923e-08		ENSG00000074266	-0.217163	1.0383e-08		ENSG00000074657	0.329577	1.82218e-05		ENSG00000088766	-0.143223	0.0212328
ENSG00000069275	-0.123284	0.00161833		ENSG00000074590	-0.458535	1.87457e-12		ENSG00000074706	-1.83873	8.43687e-98		ENSG00000088812	0.285354	0.0160105
ENSG00000069424	0.28748	6.84968e-20		ENSG00000074657	0.260914	2.72352e-05		ENSG00000074800	-0.132886	0.0186684		ENSG00000089009	-0.29504	0.000668497
ENSG00000069849	0.453208	5.4541e-18		ENSG00000074706	-1.91747	1.01731e-113		ENSG00000074842	-0.131135	0.00158175		ENSG00000089041	-0.347721	0.000839528
ENSG00000069974	0.123918	0.00374144		ENSG00000074800	-0.124818	0.0209004		ENSG00000074964	0.35981	6.09728e-07		ENSG00000089157	-0.188889	0.0121936
ENSG00000070018	-0.139685	3.35965e-12		ENSG00000074842	-0.111108	0.00434874		ENSG00000075391	-0.72963	4.22092e-19		ENSG00000090013	0.235644	9.3695e-05
ENSG00000070190	-0.119348	1.00714e-07		ENSG00000074964	0.458407	3.93671e-11		ENSG00000075420	0.74578	1.98277e-12		ENSG00000090266	-0.179018	0.00073248
ENSG00000070366	0.100278	0.0191338		ENSG00000075240	0.228947	1.76696e-05		ENSG00000075618	-0.265688	8.04363e-10		ENSG00000090530	-0.417185	1.18234e-06
ENSG00000070759	0.181726	5.60207e-11		ENSG00000075303	0.125789	0.00338449		ENSG00000075624	-0.471493	6.4669e-08		ENSG00000091073	-0.1839	0.0149364
ENSG00000070961	0.106153	0.0261715		ENSG00000075391	-0.913689	2.72557e-26		ENSG00000075651	-0.3539	3.20409e-07		ENSG00000091409	-0.159356	1.59903e-05
ENSG00000071051	-1.03682	4.75478e-64		ENSG00000075420	0.709342	2.21189e-14		ENSG00000076513	-0.116043	0.0100355		ENSG00000091428	-0.210621	0.000857983
ENSG00000071054	-0.658979	1.28915e-43		ENSG00000075618	-0.17659	0.00052629		ENSG00000076641	-0.622854	1.59732e-09		ENSG00000091592	-0.232851	0.0341284
ENSG00000071073	-0.519696	3.37684e-17		ENSG00000075624	-0.464551	9.29601e-07		ENSG00000076928	-0.111089	0.0403222		ENSG00000091831	0.561153	8.84201e-07
ENSG00000071242	-0.539406	1.53203e-23		ENSG00000075651	-0.299318	1.09622e-05		ENSG00000077044	0.270081	0.000485183		ENSG00000092964	-0.513276	2.83399e-07
ENSG00000071246	-0.600397	4.72357e-88		ENSG00000076641	-0.527346	2.9737e-08		ENSG00000077063	-0.49428	1.62663e-08		ENSG00000093000	-0.133896	0.00105748
ENSG00000071794	-0.111275	2.37533e-07		ENSG00000077044	0.274216	7.57928e-05		ENSG00000077238	-0.278014	0.00484408		ENSG00000093072	-0.159876	0.000469669
ENSG00000072110	0.139743	1.95281e-08		ENSG00000077063	-0.679972	3.52372e-21		ENSG00000077420	-1.46684	3.2668e-38		ENSG00000095585	-0.832412	6.95253e-18
ENSG00000072121	0.169707	7.96873e-10		ENSG00000077238	-0.316655	4.31756e-05		ENSG00000077549	-0.315705	0.000964859		ENSG00000095794	0.277966	0.046915
ENSG00000072134	0.111829	0.00304839		ENSG00000077420	-1.52325	1.61789e-59		ENSG00000077585	0.158672	0.0116232		ENSG00000095951	0.162916	0.0286595
ENSG00000072274	0.439921	2.82766e-13		ENSG00000077549	-0.246146	0.00738123		ENSG00000078018	-0.208883	0.0444074		ENSG00000095970	-0.2706	2.66156e-14
ENSG00000072364	0.229115	3.91348e-08		ENSG00000077585	0.118014	0.0447821		ENSG00000078043	0.257721	0.00100676		ENSG00000096060	0.514312	0.0305624
ENSG00000072422	0.267988	5.85048e-18		ENSG00000078070	-0.111798	0.0450477		ENSG00000078237	-0.193547	0.00122718		ENSG00000099250	0.76363	1.6734e-08
ENSG00000072786	0.208561	9.66818e-06		ENSG00000078687	-0.103094	0.0195371		ENSG00000078674	0.173115	0.0249085		ENSG00000099308	-0.245509	0.000533906
ENSG00000073060	-0.117249	0.00196541		ENSG00000079156	-0.49355	1.24716e-29		ENSG00000079156	-0.379593	4.14489e-11		ENSG00000099817	-0.126622	7.69566e-06
ENSG00000073331	-0.435227	8.59441e-18		ENSG00000079246	-0.246971	0.000363492		ENSG00000079263	-0.421281	2.76213e-24		ENSG00000099956	-0.107983	0.00349231
ENSG00000073849	-1.36267	3.30278e-109		ENSG00000079263	-0.369721	3.20012e-14		ENSG00000079277	-0.281863	0.00350331		ENSG00000100092	-0.100177	0.0010156
ENSG00000073921	-0.368599	2.77007e-10		ENSG00000079277	-0.383968	5.4062e-06		ENSG00000079482	0.286931	5.97191e-05		ENSG00000100239	-0.315476	0.0015879
ENSG00000074054	0.167501	0.00418052		ENSG00000079482	0.25839	1.27763e-05		ENSG00000079819	-1.52453	1.24409e-46		ENSG00000100242	-0.129932	0.0276354
ENSG00000074266	-0.112014	6.25093e-05		ENSG00000079819	-1.48413	1.32659e-54		ENSG00000080546	0.523691	1.15622e-08		ENSG00000100280	-0.236425	0.027753
ENSG00000074590	-0.45757	2.73002e-41		ENSG00000080546	0.343713	3.22589e-05		ENSG00000081014	-0.11163	0.0178824		ENSG00000100300	-0.164062	6.72048e-05
ENSG00000074657	0.223639	1.0567e-08		ENSG00000081026	-0.19721	0.0026936		ENSG00000081189	-0.272021	0.00240932		ENSG00000100345	-0.208219	0.0188655
ENSG00000074706	-1.79616	3.19422e-241		ENSG00000081189	-0.434075	3.63962e-07		ENSG00000081237	-0.254606	0.0157804		ENSG00000100376	-0.16048	0.0291163
ENSG00000074755	0.10149	0.0131261		ENSG00000081237	-0.446538	0.000101024		ENSG00000081320	0.399693	8.33076e-08		ENSG00000100505	-0.153421	0.035085
ENSG00000074964	0.34737	3.50793e-15		ENSG00000081320	0.445139	5.75675e-13		ENSG00000081377	-0.223769	0.000845451		ENSG00000100596	-0.491913	0.000297945
ENSG00000075240	0.160479	3.54239e-07		ENSG00000081377	-0.314602	3.83304e-09		ENSG00000081923	-0.269761	6.39289e-08		ENSG00000100599	-0.31609	0.0233158
ENSG00000075292	0.104871	0.0455162		ENSG00000082074	-1.014	8.30677e-28		ENSG00000082074	-0.928762	2.37292e-16		ENSG00000100600	0.543484	0.00099467
ENSG00000075391	-0.734375	6.09328e-49		ENSG00000082212	-0.206733	0.00252387		ENSG00000082269	-0.403384	1.22067e-06		ENSG00000100605	-0.174901	0.0143847
ENSG00000075420	0.672074	6.22647e-25		ENSG00000082269	-0.418485	1.45392e-08		ENSG00000082397	0.82576	8.04508e-14		ENSG00000100644	0.469179	0.00955732
ENSG00000075568	0.106801	0.0434145		ENSG00000082397	0.758214	8.06249e-12		ENSG00000082996	0.42826	1.06528e-05		ENSG00000100852	0.508267	6.8781e-06
ENSG00000075618	-0.255061	2.50075e-20		ENSG00000082781	0.243704	0.000811729		ENSG00000083123	-0.260963	3.04312e-05		ENSG00000100888	-0.203971	0.000820503
ENSG00000075624	-0.383404	9.94855e-13		ENSG00000082996	0.363364	6.70543e-06		ENSG00000083290	-0.149066	0.0267056		ENSG00000100979	0.518738	2.01404e-05
ENSG00000075651	-0.34317	1.48313e-17		ENSG00000083123	-0.233021	0.000241402		ENSG00000084112	-0.495305	4.01386e-16		ENSG00000101019	-0.159291	0.0381786
ENSG00000075785	0.239177	2.74355e-06		ENSG00000084112	-0.645672	6.68843e-27		ENSG00000084676	0.326527	0.000282633		ENSG00000101096	-0.416452	0.00185807
ENSG00000075884	-0.158014	0.0200692		ENSG00000084234	0.199347	0.00479106		ENSG00000084731	-0.180804	5.22283e-05		ENSG00000101247	-0.149726	0.00463687
ENSG00000076641	-0.559785	7.49895e-21		ENSG00000084676	0.245381	0.0047749		ENSG00000085491	0.208486	0.000388194		ENSG00000101463	-1.99029	7.28005e-55
ENSG00000076685	0.241919	4.56758e-07		ENSG00000084731	-0.171817	3.42209e-05		ENSG00000085832	0.779461	1.31344e-17		ENSG00000101474	-0.413898	7.45443e-07
ENSG00000077044	0.35656	1.50469e-18		ENSG00000085491	0.152644	0.00176527		ENSG00000085871	-0.209229	0.00345356		ENSG00000101493	0.24815	0.013311
ENSG00000077063	-0.461444	4.26713e-19		ENSG00000085662	0.139234	0.00819936		ENSG00000086300	0.206908	0.00394744		ENSG00000101577	-0.296977	0.00130196
ENSG00000077232	-0.16914	1.55187e-08		ENSG00000085832	0.904075	1.02837e-32		ENSG00000086730	-0.611761	4.30058e-23		ENSG00000101745	0.356703	0.00807724
ENSG00000077238	-0.237171	1.00509e-06		ENSG00000085871	-0.137676	0.0398165		ENSG00000087086	-0.577718	1.72179e-05		ENSG00000102038	-0.224694	7.19742e-06
ENSG00000077420	-1.39712	4.34461e-112		ENSG00000086544	0.141628	0.00153081		ENSG00000087088	-0.126145	0.000263931		ENSG00000102226	-0.140814	0.00976194
ENSG00000077549	-0.3131	5.06017e-10		ENSG00000086730	-0.620464	2.61604e-25		ENSG00000087095	0.398423	2.20561e-07		ENSG00000102445	-0.329101	0.0105459
ENSG00000077585	0.155962	2.62836e-06		ENSG00000087086	-0.488363	0.00101135		ENSG00000087206	-0.158562	0.0122488		ENSG00000102531	0.475694	0.00126332
ENSG00000078043	0.205644	2.41871e-06		ENSG00000087088	-0.122394	2.79462e-06		ENSG00000087253	-0.964629	6.94727e-30		ENSG00000102606	-0.245062	0.0213287
ENSG00000078070	-0.136645	3.25734e-06		ENSG00000087253	-0.96059	1.24263e-28		ENSG00000088205	-0.108419	0.00681535		ENSG00000102753	-0.210473	0.0318874
ENSG00000078237	-0.16532	8.61277e-08		ENSG00000087460	-0.282968	0.000811041		ENSG00000088812	0.341534	0.000111215		ENSG00000102780	0.324153	0.000260265
ENSG00000078304	0.125795	0.0162685		ENSG00000088367	0.144346	0.00515744		ENSG00000089009	-0.19695	0.00179076		ENSG00000102879	-0.181096	0.00672537
ENSG00000078403	0.255258	7.87309e-07		ENSG00000088538	-0.214796	0.000756635		ENSG00000089041	-0.251269	0.000393649		ENSG00000103061	-0.17319	0.000790007
ENSG00000079156	-0.389318	2.03198e-53		ENSG00000088812	0.247996	0.00119261		ENSG00000089060	-0.142735	0.0053596		ENSG00000103064	-0.303158	0.000260265
ENSG00000079263	-0.368412	8.79481e-50		ENSG00000089041	-0.299316	1.07888e-06		ENSG00000089157	-0.178443	0.00152551		ENSG00000103187	-0.517282	7.07355e-12
ENSG00000079277	-0.258124	2.21737e-07		ENSG00000089057	-0.201506	0.00157189		ENSG00000090013	0.245619	1.78263e-06		ENSG00000103222	0.190453	0.0412873
ENSG00000079482	0.271795	5.07006e-11		ENSG00000089060	-0.139665	0.00131312		ENSG00000090104	-0.417424	0.00037155		ENSG00000103275	-0.127794	0.0226148
ENSG00000079819	-1.30012	4.40712e-109		ENSG00000089127	0.13455	0.00725691		ENSG00000090238	-0.13428	0.00993252		ENSG00000103319	0.193497	0.0330086
ENSG00000080298	-0.169926	0.000972293		ENSG00000089177	0.198601	0.0295736		ENSG00000090273	-0.103201	0.0220891		ENSG00000103335	-0.154449	0.0113698
ENSG00000080371	0.126078	0.000134463		ENSG00000089248	-0.116933	0.00159124		ENSG00000090487	0.124105	0.0166065		ENSG00000103479	-0.212989	0.00297922
ENSG00000080546	0.566596	8.02819e-24		ENSG00000089682	-0.106559	0.0287527		ENSG00000090530	-0.509639	2.22132e-18		ENSG00000103489	-0.228519	0.000225658
ENSG00000080802	0.101324	0.0356051		ENSG00000090013	0.286377	2.34935e-11		ENSG00000090674	0.218117	7.3369e-05		ENSG00000103528	-0.434438	5.5796e-05
ENSG00000080815	0.15086	0.000412777		ENSG00000090104	-0.374256	0.00374611		ENSG00000091039	0.29018	0.000858916		ENSG00000103540	-0.127611	0.00283062
ENSG00000081026	-0.117313	0.004876		ENSG00000090266	-0.111709	0.00274082		ENSG00000091073	-0.116594	0.0258158		ENSG00000103769	-0.193249	0.0461745
ENSG00000081189	-0.362168	5.71129e-12		ENSG00000090487	0.155436	0.000214831		ENSG00000091831	0.61877	9.78683e-17		ENSG00000103855	-0.127153	0.0214833
ENSG00000081237	-0.358001	5.67052e-11		ENSG00000090530	-0.543476	2.08775e-20		ENSG00000092068	0.191039	0.000475362		ENSG00000104043	-0.499074	2.675e-06
ENSG00000081320	0.467948	1.45695e-30		ENSG00000090661	-0.114701	0.0035865		ENSG00000092841	-0.123904	0.00349952		ENSG00000104067	-0.316841	4.31633e-06
ENSG00000081377	-0.160679	2.91015e-05		ENSG00000090674	0.223631	1.5181e-07		ENSG00000092964	-0.384114	9.38417e-08		ENSG00000104093	0.41003	3.5504e-05
ENSG00000081923	-0.16676	3.9421e-09		ENSG00000091039	0.209359	0.00675078		ENSG00000093144	-0.151705	0.0239696		ENSG00000104219	-0.203624	0.00595631
ENSG00000082074	-0.835766	5.79844e-42		ENSG00000091129	-0.126145	0.0194806		ENSG00000094916	-0.128637	0.0080221		ENSG00000104447	1.14837	5.77513e-18
ENSG00000082212	-0.114122	0.00846085		ENSG00000091409	-0.12413	0.000650818		ENSG00000095015	0.282143	0.000294739		ENSG00000104613	-0.222246	0.0481664
ENSG00000082269	-0.389292	3.61633e-16		ENSG00000091831	0.59195	2.33333e-16		ENSG00000095261	-0.10015	0.00438417		ENSG00000104763	0.288977	0.0178789
ENSG00000082397	0.758682	1.47116e-27		ENSG00000092068	0.14776	0.00128015		ENSG00000095564	-0.221037	0.00320253		ENSG00000104853	-0.130639	0.0181695
ENSG00000082996	0.37853	4.23879e-12		ENSG00000092847	-0.127791	0.000333259		ENSG00000095585	-0.76505	7.6623e-16		ENSG00000104859	-0.162558	0.0496082
ENSG00000083123	-0.176854	3.70152e-06		ENSG00000092964	-0.39745	2.75562e-09		ENSG00000095794	0.317433	0.00027858		ENSG00000104972	-0.291351	3.02064e-05
ENSG00000083223	0.121738	0.0110187		ENSG00000093144	-0.136427	0.0222848		ENSG00000095951	0.158758	0.00830583		ENSG00000105122	-0.186737	0.00140793
ENSG00000083290	-0.112099	0.00386982		ENSG00000093167	0.16547	0.0153626		ENSG00000095970	-0.253963	7.72113e-19		ENSG00000105281	-0.128459	0.0279501
ENSG00000083544	-0.127875	0.000797285		ENSG00000094916	-0.193499	2.19006e-07		ENSG00000096060	0.801325	1.35128e-05		ENSG00000105339	-0.894105	2.14514e-10
ENSG00000083828	0.132736	1.3526e-06		ENSG00000095015	0.205511	0.0122482		ENSG00000096384	-0.20608	0.0240041		ENSG00000105366	-0.201495	0.00283062
ENSG00000084112	-0.496465	1.1733e-36		ENSG00000095564	-0.17609	0.0122006		ENSG00000097007	0.22437	0.0121528		ENSG00000105372	-0.312198	0.016392
ENSG00000084234	0.17614	9.39815e-05		ENSG00000095585	-0.802074	2.24894e-17		ENSG00000099250	1.19423	8.19213e-27		ENSG00000105639	-0.476621	4.68363e-07
ENSG00000084676	0.297565	5.91024e-08		ENSG00000095794	0.35327	3.01616e-05		ENSG00000099308	-0.281909	1.04145e-10		ENSG00000105810	-0.693481	1.04162e-13
ENSG00000084731	-0.185733	8.17508e-16		ENSG00000095951	0.240637	1.56502e-06		ENSG00000099624	-0.112639	0.00273705		ENSG00000105835	1.10258	2.40264e-06
ENSG00000085224	0.131672	0.00832952		ENSG00000095970	-0.254848	1.33323e-10		ENSG00000100095	-0.101693	0.000459346		ENSG00000105889	-0.316736	7.66094e-07
ENSG00000085491	0.245666	1.48313e-17		ENSG00000096060	0.674815	1.42553e-05		ENSG00000100239	-0.235586	0.00503672		ENSG00000106244	-0.12303	0.01847
ENSG00000085662	0.2173	1.18177e-12		ENSG00000099139	-0.147066	0.00501457		ENSG00000100280	-0.258546	0.000997057		ENSG00000106266	0.174787	0.023517
ENSG00000085832	0.788849	1.6579e-52		ENSG00000099250	1.16063	2.03829e-27		ENSG00000100292	-0.146189	0.00770758		ENSG00000106415	-0.388037	4.25328e-06
ENSG00000085871	-0.117744	0.00384495		ENSG00000099308	-0.24635	6.02308e-09		ENSG00000100300	-0.113236	0.00309555		ENSG00000106479	-0.118901	0.0317843
ENSG00000086062	0.152254	0.00516214		ENSG00000099783	-0.164053	0.0151182		ENSG00000100311	-0.208213	0.00493641		ENSG00000106565	-0.204209	0.0385801
ENSG00000086300	0.12773	0.00034218		ENSG00000100095	-0.126963	1.27683e-06		ENSG00000100316	-0.231493	0.00832884		ENSG00000106608	-0.126951	0.0211735
ENSG00000086544	0.105697	3.90976e-05		ENSG00000100154	-0.261883	0.00549579		ENSG00000100320	0.211437	0.000710554		ENSG00000106617	0.303496	0.0406141
ENSG00000086619	0.129949	0.000298624		ENSG00000100239	-0.266168	0.000104447		ENSG00000100365	0.200194	2.70377e-05		ENSG00000106683	-0.169116	0.00551493
ENSG00000086730	-0.47232	2.17112e-39		ENSG00000100266	-0.258732	0.0018674		ENSG00000100422	-0.15872	9.89985e-06		ENSG00000106785	0.329417	0.00141391
ENSG00000087086	-0.327661	1.05919e-05		ENSG00000100280	-0.350689	1.55418e-07		ENSG00000100485	0.229657	0.00460923		ENSG00000106799	-0.711381	8.31583e-08
ENSG00000087088	-0.100894	3.93051e-08		ENSG00000100292	-0.174537	0.00245882		ENSG00000100503	0.183989	0.0102689		ENSG00000106948	-0.25718	0.0010736
ENSG00000087095	0.318908	2.00282e-09		ENSG00000100300	-0.125955	0.000225669		ENSG00000100504	0.396491	3.00764e-05		ENSG00000107099	-1.06045	5.38542e-21
ENSG00000087253	-0.963421	3.02746e-89		ENSG00000100320	0.170913	0.00511102		ENSG00000100580	-0.192272	0.00328558		ENSG00000107242	-0.436499	8.32439e-11
ENSG00000087460	-0.151574	0.000767625		ENSG00000100345	-0.173072	0.00625231		ENSG00000100600	0.964739	7.75913e-22		ENSG00000107263	-0.427416	0.00073248
ENSG00000088538	-0.171664	2.02113e-05		ENSG00000100504	0.337101	2.42321e-05		ENSG00000100605	-0.145602	0.00666924		ENSG00000107719	-1.143	1.43652e-27
ENSG00000088812	0.334053	1.27772e-14		ENSG00000100599	-0.211545	0.0403585		ENSG00000100612	-0.142432	8.05043e-06		ENSG00000107736	-0.206149	0.000489239
ENSG00000088854	0.318275	0.00104075		ENSG00000100600	1.00372	8.02414e-21		ENSG00000100697	0.286716	0.000342363		ENSG00000107738	-0.391366	9.19915e-06
ENSG00000089009	-0.148938	5.8853e-05		ENSG00000100605	-0.13587	0.0130963		ENSG00000100852	0.714849	2.09745e-26		ENSG00000107829	-0.17091	0.0466897
ENSG00000089041	-0.198056	2.56573e-06		ENSG00000100612	-0.153924	5.11983e-06		ENSG00000100979	0.782315	1.61744e-16		ENSG00000107862	-0.241589	0.015102
ENSG00000089057	-0.115774	0.0078871		ENSG00000100644	0.464038	0.000332557		ENSG00000101079	-0.118286	0.0269364		ENSG00000107863	-0.304404	0.0154282
ENSG00000089127	0.123386	6.10833e-07		ENSG00000100647	-0.25033	0.0163158		ENSG00000101096	-0.541902	1.15622e-08		ENSG00000107957	0.395702	2.56102e-06
ENSG00000089177	0.276983	6.07774e-08		ENSG00000100852	0.632763	2.35579e-19		ENSG00000101109	-0.186881	0.0264246		ENSG00000108219	-0.292603	0.00572868
ENSG00000089902	0.131003	0.0070269		ENSG00000100979	0.643169	5.91027e-13		ENSG00000101150	0.179344	0.000923513		ENSG00000108509	-0.131845	0.0181695
ENSG00000089916	0.126058	0.00656405		ENSG00000100997	-0.22978	0.00247138		ENSG00000101152	0.198588	0.0413296		ENSG00000108557	-0.171384	0.00099467
ENSG00000090013	0.278	2.01746e-24		ENSG00000101079	-0.118666	0.00344516		ENSG00000101439	-0.300125	3.44761e-05		ENSG00000108639	-0.183911	0.000188066
ENSG00000090104	-0.424058	7.55538e-10		ENSG00000101096	-0.415938	2.89576e-06		ENSG00000101463	-1.94518	1.97482e-72		ENSG00000108654	-0.248802	0.0185127
ENSG00000090238	-0.100763	0.000297759		ENSG00000101109	-0.190764	0.015193		ENSG00000101464	-0.126502	0.000723154		ENSG00000108669	0.686328	1.73521e-10
ENSG00000090487	0.108503	1.02438e-05		ENSG00000101150	0.211436	3.01212e-06		ENSG00000101474	-0.366233	4.21393e-14		ENSG00000108798	-0.178303	0.0010736
ENSG00000090530	-0.493269	3.43412e-44		ENSG00000101236	-0.170165	0.00250854		ENSG00000101558	0.26859	6.40637e-05		ENSG00000108950	0.547749	9.17288e-06
ENSG00000090674	0.262944	4.72722e-24		ENSG00000101463	-2.3078	1.72118e-113		ENSG00000101577	-0.331159	3.6449e-06		ENSG00000108953	-0.22479	0.0136062
ENSG00000090989	0.104528	0.00764859		ENSG00000101474	-0.342063	2.92563e-09		ENSG00000101596	0.238781	0.0239799		ENSG00000109381	0.329175	0.00979499
ENSG00000091039	0.22607	1.93743e-07		ENSG00000101577	-0.403424	7.0628e-10		ENSG00000101695	-0.109173	0.0259425		ENSG00000109654	-0.168506	0.0399379
ENSG00000091409	-0.106396	2.76532e-07		ENSG00000101596	0.260641	0.00114109		ENSG00000101745	0.490112	1.48951e-08		ENSG00000109667	0.559592	1.46892e-07
ENSG00000091428	-0.155423	2.77085e-09		ENSG00000101745	0.412069	3.7328e-07		ENSG00000101849	0.198953	0.00750013		ENSG00000109790	-0.57781	4.2013e-10
ENSG00000091831	0.518146	1.59275e-29		ENSG00000101849	0.172963	0.0123327		ENSG00000102032	0.15053	0.00167694		ENSG00000109794	-0.958012	1.70493e-25
ENSG00000092068	0.189483	7.56517e-13		ENSG00000102038	-0.120496	0.00616636		ENSG00000102038	-0.168546	0.000144287		ENSG00000110031	-0.180881	0.00270262
ENSG00000092439	0.199515	3.28915e-05		ENSG00000102445	-0.257834	0.00242524		ENSG00000102189	0.217114	0.00393169		ENSG00000110077	0.708324	3.51743e-07
ENSG00000092841	-0.112574	5.80023e-06		ENSG00000102531	0.517889	1.00053e-09		ENSG00000102445	-0.217209	0.0263438		ENSG00000110079	1.04029	4.8418e-19
ENSG00000092871	-0.113864	0.00452096		ENSG00000102572	-0.133089	0.0354952		ENSG00000102531	0.518616	1.09024e-07		ENSG00000110092	-0.20159	0.0023074
ENSG00000092964	-0.441958	4.5598e-30		ENSG00000102606	-0.184206	0.0123884		ENSG00000102753	-0.16696	0.0211822		ENSG00000110330	-0.14299	0.00360438
ENSG00000093167	0.140602	0.000400716		ENSG00000102763	0.151896	0.0383806		ENSG00000102780	0.232088	0.000326559		ENSG00000110583	-0.132705	0.0147847
ENSG00000095015	0.157056	0.00081029		ENSG00000102780	0.233628	6.66401e-06		ENSG00000102879	-0.244754	6.62309e-11		ENSG00000110651	-0.456579	3.97427e-06
ENSG00000095585	-0.833363	4.71731e-67		ENSG00000102786	-0.204946	0.00742237		ENSG00000102893	0.2351	0.00459539		ENSG00000110934	-0.27641	0.000413888
ENSG00000095794	0.345734	2.36499e-13		ENSG00000102879	-0.225895	2.72736e-11		ENSG00000102921	0.203756	0.0215347		ENSG00000111145	-0.216992	0.00124767
ENSG00000095951	0.225363	1.8066e-12		ENSG00000102893	0.199551	0.012578		ENSG00000103024	-0.111261	0.00281031		ENSG00000111348	-0.166853	0.0337969
ENSG00000095970	-0.215703	1.90411e-30		ENSG00000103061	-0.13344	0.000333171		ENSG00000103034	-0.153741	0.00545286		ENSG00000111860	-0.31154	8.12037e-05
ENSG00000096060	0.696362	2.74073e-16		ENSG00000103064	-0.37257	3.9618e-12		ENSG00000103042	0.120908	0.00466157		ENSG00000111885	1.05576	1.94951e-10
ENSG00000096384	-0.115365	0.0469203		ENSG00000103187	-0.59633	8.65853e-25		ENSG00000103061	-0.150029	7.24586e-05		ENSG00000111962	-0.277575	0.0160267
ENSG00000099250	0.892028	5.12049e-46		ENSG00000103222	0.168579	0.00247072		ENSG00000103064	-0.398707	3.97768e-13		ENSG00000112033	-0.327864	0.0298673
ENSG00000099290	0.113252	3.70406e-08		ENSG00000103257	-0.236296	7.64753e-05		ENSG00000103187	-0.489792	3.78776e-15		ENSG00000112232	0.339062	0.0030463
ENSG00000099308	-0.216642	9.59287e-17		ENSG00000103319	0.187347	0.000116208		ENSG00000103222	0.321186	2.30397e-07		ENSG00000112414	0.613137	5.03916e-12
ENSG00000099783	-0.127516	0.00109248		ENSG00000103335	-0.127913	0.00101549		ENSG00000103249	0.108443	0.0317483		ENSG00000112531	-0.300642	0.00779169
ENSG00000100077	0.316659	2.53446e-09		ENSG00000103479	-0.103097	0.0450477		ENSG00000103319	0.308356	2.81875e-06		ENSG00000112561	-0.234947	0.00171026
ENSG00000100100	0.128197	8.41103e-05		ENSG00000103489	-0.463409	1.05322e-24		ENSG00000103335	-0.140472	0.000260608		ENSG00000112624	-0.238869	0.0357613
ENSG00000100154	-0.155132	0.012374		ENSG00000103528	-0.325036	2.16031e-05		ENSG00000103365	-0.1727	0.0128183		ENSG00000112699	-0.292328	0.0272635
ENSG00000100239	-0.218367	3.19413e-07		ENSG00000103653	-0.175452	4.00996e-06		ENSG00000103489	-0.263181	2.05878e-07		ENSG00000112799	-0.735319	8.06931e-12
ENSG00000100266	-0.23428	1.1245e-05		ENSG00000103657	0.231049	0.00423176		ENSG00000103528	-0.354975	4.07911e-05		ENSG00000112851	0.40481	0.000717135
ENSG00000100280	-0.170977	8.82095e-05		ENSG00000103769	-0.261442	1.25757e-05		ENSG00000103653	-0.193986	1.93298e-08		ENSG00000113583	-0.136887	0.0146594
ENSG00000100300	-0.125797	2.49967e-11		ENSG00000103811	-0.14917	0.00438007		ENSG00000103657	0.273394	0.000847081		ENSG00000113597	-0.153007	0.00266126
ENSG00000100311	-0.185086	4.59821e-06		ENSG00000103855	-0.151714	9.14041e-06		ENSG00000103769	-0.355339	1.45334e-08		ENSG00000113916	-0.293016	0.0270392
ENSG00000100316	-0.127166	0.0158242		ENSG00000103966	0.154419	0.0104276		ENSG00000103811	-0.131653	0.0113261		ENSG00000114423	0.423168	3.6765e-05
ENSG00000100320	0.193168	9.93039e-08		ENSG00000104043	-0.404468	7.49075e-06		ENSG00000103855	-0.189643	1.74857e-08		ENSG00000114450	-0.526741	6.94812e-09
ENSG00000100330	0.125235	0.00552671		ENSG00000104067	-0.30009	3.95828e-13		ENSG00000103994	-0.179094	0.0336067		ENSG00000114541	0.745857	6.75795e-07
ENSG00000100345	-0.144246	4.95255e-05		ENSG00000104093	0.413937	2.58302e-07		ENSG00000104043	-0.297556	0.00925153		ENSG00000114770	0.234034	0.0304444
ENSG00000100354	0.113617	0.0456923		ENSG00000104177	-0.113122	6.98341e-05		ENSG00000104067	-0.319461	1.17608e-17		ENSG00000114861	0.580698	0.000196271
ENSG00000100365	0.118183	2.85087e-06		ENSG00000104375	0.231976	0.0116862		ENSG00000104093	0.594426	4.62053e-12		ENSG00000115233	-0.223615	0.0128806
ENSG00000100422	-0.115662	1.19379e-07		ENSG00000104447	1.16106	9.20107e-29		ENSG00000104219	-0.137609	0.0343578		ENSG00000115760	0.245417	0.0465861
ENSG00000100485	0.190421	9.13251e-06		ENSG00000104613	-0.155117	0.0254705		ENSG00000104427	0.103758	0.0462187		ENSG00000115825	-0.42263	1.58195e-06
ENSG00000100503	0.144143	0.000161477		ENSG00000104763	0.285931	0.000359793		ENSG00000104435	-0.14476	0.0320331		ENSG00000115896	-0.439892	2.60497e-05
ENSG00000100504	0.394351	6.42158e-14		ENSG00000104774	-0.106061	0.0289575		ENSG00000104447	1.43621	4.20037e-44		ENSG00000115944	-0.137415	0.0280443
ENSG00000100580	-0.123404	0.000381848		ENSG00000104870	0.32156	9.24493e-08		ENSG00000104517	0.185269	0.0251781		ENSG00000116191	-0.447077	4.26503e-10
ENSG00000100596	-0.198811	0.00188253		ENSG00000104894	-0.12719	0.00374611		ENSG00000104774	-0.12466	0.00488419		ENSG00000116251	-0.208423	0.018453
ENSG00000100599	-0.179345	0.0038744		ENSG00000104972	-0.234489	5.68864e-05		ENSG00000104870	0.253463	0.000376681		ENSG00000116641	0.324166	0.00286622
ENSG00000100600	0.799876	3.49535e-43		ENSG00000105122	-0.258402	2.18056e-20		ENSG00000104972	-0.246214	0.00019833		ENSG00000116701	0.163272	0.0305854
ENSG00000100605	-0.115294	0.000111998		ENSG00000105223	0.272675	6.2549e-06		ENSG00000105122	-0.186454	4.28941e-09		ENSG00000116711	-0.414419	7.17668e-07
ENSG00000100612	-0.147679	2.634e-15		ENSG00000105246	-0.103322	0.012696		ENSG00000105193	-0.160158	0.027329		ENSG00000116729	0.528958	1.13566e-09
ENSG00000100644	0.448376	3.19959e-09		ENSG00000105339	-0.95323	6.66584e-24		ENSG00000105223	0.282897	5.21191e-06		ENSG00000116815	-0.219782	0.00748577
ENSG00000100697	0.221966	1.24539e-06		ENSG00000105366	-0.227908	2.07331e-11		ENSG00000105246	-0.150356	0.000397899		ENSG00000116991	-0.650275	1.07501e-11
ENSG00000100731	0.187524	0.00344307		ENSG00000105372	-0.23016	0.0185617		ENSG00000105329	-0.187564	0.0092559		ENSG00000117020	-0.444468	0.000119461
ENSG00000100796	0.109338	0.0110892		ENSG00000105639	-0.382896	1.2138e-10		ENSG00000105339	-1.00368	1.59025e-19		ENSG00000117054	-0.13588	0.0102594
ENSG00000100852	0.644723	7.17089e-41		ENSG00000105656	0.257803	4.32093e-05		ENSG00000105366	-0.22196	7.492e-12		ENSG00000117114	0.289616	0.0178789
ENSG00000100979	0.63047	6.54259e-30		ENSG00000105698	-0.159553	0.000288159		ENSG00000105372	-0.390954	1.35935e-06		ENSG00000117115	-0.676042	1.05231e-08
ENSG00000100997	-0.257637	2.23542e-11		ENSG00000105810	-0.55075	1.3344e-14		ENSG00000105639	-0.419979	5.33473e-09		ENSG00000117154	-0.85095	5.58946e-12
ENSG00000101096	-0.479425	4.51803e-20		ENSG00000105835	1.37301	4.7753e-18		ENSG00000105640	-0.145982	0.0383516		ENSG00000117676	-0.287748	0.000203297
ENSG00000101150	0.179572	1.04097e-11		ENSG00000105866	-0.107217	0.000820085		ENSG00000105656	0.190386	0.0155692		ENSG00000118200	-0.222222	0.0221959
ENSG00000101236	-0.104812	0.0024565		ENSG00000105889	-0.327918	1.39625e-09		ENSG00000105698	-0.148509	0.00247019		ENSG00000118257	0.401795	0.000294796
ENSG00000101463	-2.06906	2.29086e-302		ENSG00000105928	-0.100097	0.0257592		ENSG00000105810	-0.501144	1.00427e-08		ENSG00000118263	0.339483	0.00193352
ENSG00000101474	-0.289742	3.72234e-17		ENSG00000106034	-0.434369	1.1891e-05		ENSG00000105835	1.34587	5.02741e-12		ENSG00000118515	-0.242	0.0298673
ENSG00000101493	0.157186	0.000539142		ENSG00000106100	-0.159953	8.92411e-05		ENSG00000105889	-0.393697	1.37904e-17		ENSG00000118690	0.148211	0.0473872
ENSG00000101558	0.190236	2.14859e-05		ENSG00000106266	0.215255	8.03574e-07		ENSG00000105967	0.211117	0.0211822		ENSG00000118707	-0.136887	0.000457708
ENSG00000101577	-0.42071	3.77128e-28		ENSG00000106415	-0.272188	1.13924e-05		ENSG00000106034	-0.340768	0.0105898		ENSG00000118762	-0.486046	3.05362e-08
ENSG00000101596	0.353929	3.23041e-11		ENSG00000106459	-0.146211	0.0440209		ENSG00000106086	-0.106985	0.0137129		ENSG00000118785	-1.96598	4.99605e-22
ENSG00000101745	0.472166	5.3815e-19		ENSG00000106479	-0.122984	0.00239564		ENSG00000106266	0.282268	1.91792e-07		ENSG00000118855	0.354014	0.000327354
ENSG00000101849	0.275535	4.27612e-13		ENSG00000106565	-0.190887	0.000129832		ENSG00000106565	-0.137659	0.0415761		ENSG00000118922	-0.249556	0.000210828
ENSG00000101974	-0.114096	0.0249126		ENSG00000106665	-0.263351	2.50841e-06		ENSG00000106617	0.291845	0.0172244		ENSG00000119335	-0.138226	0.0199275
ENSG00000102032	0.144953	2.49995e-11		ENSG00000106683	-0.13818	9.19329e-05		ENSG00000106665	-0.189878	0.00660926		ENSG00000119522	0.543889	3.10847e-05
ENSG00000102038	-0.211437	1.82288e-16		ENSG00000106733	0.117968	0.0172397		ENSG00000106683	-0.109528	0.0128183		ENSG00000119535	-0.496268	1.17353e-07
ENSG00000102144	-0.106674	0.004754		ENSG00000106772	0.102387	0.0214153		ENSG00000106733	0.201139	0.00135089		ENSG00000119778	-0.234078	0.0163238
ENSG00000102158	0.132815	0.000270118		ENSG00000106785	0.488056	5.73567e-14		ENSG00000106785	0.360149	1.0722e-06		ENSG00000119865	0.225606	0.00328025
ENSG00000102172	0.112211	0.00266673		ENSG00000106799	-0.770187	1.55806e-15		ENSG00000106799	-0.700775	9.04395e-12		ENSG00000119900	-0.304993	0.0163569
ENSG00000102189	0.19008	5.4219e-06		ENSG00000106948	-0.284598	5.29582e-09		ENSG00000106948	-0.320354	3.04699e-11		ENSG00000120129	0.257566	0.0260183
ENSG00000102445	-0.160723	0.00190617		ENSG00000107099	-1.1257	6.0234e-33		ENSG00000106952	0.140623	0.000870961		ENSG00000120254	-0.921413	4.28409e-13
ENSG00000102531	0.542821	1.94549e-19		ENSG00000107242	-0.579901	3.50168e-48		ENSG00000107099	-0.94018	8.17382e-20		ENSG00000120594	-0.994862	2.1396e-14
ENSG00000102606	-0.150924	0.000255366		ENSG00000107263	-0.389771	1.87766e-05		ENSG00000107242	-0.534971	2.16387e-32		ENSG00000120675	-0.186532	0.0171169
ENSG00000102763	0.137298	0.00166103		ENSG00000107551	-0.283296	0.00022888		ENSG00000107263	-0.294806	0.0050063		ENSG00000120860	-0.11719	0.038688
ENSG00000102780	0.165255	8.26047e-08		ENSG00000107562	0.114806	0.0198244		ENSG00000107341	0.176064	0.0380251		ENSG00000120889	-0.218111	0.00422371
ENSG00000102879	-0.184955	7.00899e-14		ENSG00000107679	0.191899	0.00282561		ENSG00000107551	-0.325814	0.00047511		ENSG00000121064	-0.255589	1.29234e-07
ENSG00000102893	0.214323	1.93281e-05		ENSG00000107719	-1.16729	1.17063e-49		ENSG00000107679	0.266965	3.11653e-06		ENSG00000121210	-0.299044	0.00537747
ENSG00000102908	0.162453	0.00348039		ENSG00000107736	-0.138206	0.00199354		ENSG00000107719	-1.1205	3.64956e-38		ENSG00000121895	-0.740943	1.26113e-17
ENSG00000102921	0.205915	1.72867e-06		ENSG00000107738	-0.417179	1.97665e-11		ENSG00000107736	-0.249539	5.82155e-13		ENSG00000121933	-0.393656	3.77903e-14
ENSG00000103042	0.107768	8.33958e-07		ENSG00000107758	-0.192745	0.000638868		ENSG00000107738	-0.346853	3.49193e-08		ENSG00000121964	0.455575	0.00382533
ENSG00000103061	-0.116067	6.94635e-08		ENSG00000107779	-0.222391	0.000824248		ENSG00000107745	0.303031	1.92774e-05		ENSG00000122034	-0.188649	0.000562851
ENSG00000103064	-0.293617	2.3538e-23		ENSG00000107863	-0.265615	0.00257753		ENSG00000107758	-0.148169	0.023284		ENSG00000122068	-0.169596	0.000947262
ENSG00000103187	-0.482049	7.08116e-42		ENSG00000107957	0.480382	2.34728e-13		ENSG00000107863	-0.266424	0.0072498		ENSG00000122406	-0.226858	0.020152
ENSG00000103222	0.210375	4.21736e-11		ENSG00000107968	0.298712	0.0112397		ENSG00000107957	0.468474	1.24407e-11		ENSG00000122707	-0.349158	1.01678e-05
ENSG00000103257	-0.140857	2.72571e-05		ENSG00000108175	0.192206	0.00532139		ENSG00000107968	0.36559	0.00438417		ENSG00000122779	-0.126536	0.0467741
ENSG00000103319	0.309171	1.02154e-20		ENSG00000108219	-0.364265	4.48181e-07		ENSG00000108100	-0.236196	0.0383516		ENSG00000122783	-0.114829	0.00726134
ENSG00000103335	-0.120252	5.36283e-08		ENSG00000108298	-0.218029	0.0258227		ENSG00000108175	0.286787	5.05858e-05		ENSG00000122862	0.633906	0.0024062
ENSG00000103489	-0.326789	5.09146e-34		ENSG00000108518	-0.115748	0.0029267		ENSG00000108219	-0.309299	0.000208966		ENSG00000123091	-0.14791	0.0147847
ENSG00000103528	-0.316815	2.6893e-11		ENSG00000108639	-0.137772	0.000446449		ENSG00000108256	0.188207	0.0460067		ENSG00000123094	-1.44195	6.1983e-41
ENSG00000103653	-0.131412	2.65112e-09		ENSG00000108654	-0.354179	0.000185867		ENSG00000108298	-0.321958	0.000101804		ENSG00000123095	-0.906017	1.75257e-28
ENSG00000103657	0.243937	2.90524e-07		ENSG00000108669	0.588816	1.7129e-12		ENSG00000108306	0.245065	0.00135291		ENSG00000123104	-0.611345	5.04862e-09
ENSG00000103769	-0.281336	3.50793e-15		ENSG00000108798	-0.23617	9.05422e-13		ENSG00000108518	-0.105017	0.0155157		ENSG00000123124	0.67388	6.54882e-08
ENSG00000103811	-0.127882	1.22612e-05		ENSG00000108854	-0.189774	0.025612		ENSG00000108639	-0.134493	0.000133631		ENSG00000123338	-0.309307	0.00140793
ENSG00000103855	-0.141155	5.36003e-11		ENSG00000108950	0.705989	8.18009e-19		ENSG00000108654	-0.315599	0.000971283		ENSG00000123933	-0.178256	0.0150755
ENSG00000104043	-0.511322	6.41096e-20		ENSG00000108960	-0.134678	0.0100946		ENSG00000108669	0.773711	4.93988e-16		ENSG00000124225	-0.162011	0.00382621
ENSG00000104067	-0.386151	1.61808e-53		ENSG00000109452	0.139891	0.00919659		ENSG00000108798	-0.24349	7.66841e-14		ENSG00000124491	3.05721	7.79976e-41
ENSG00000104093	0.578196	2.15309e-29		ENSG00000109667	0.524506	5.49979e-12		ENSG00000108854	-0.241879	0.00353344		ENSG00000124496	-0.340098	2.90007e-06
ENSG00000104205	0.134225	0.0114384		ENSG00000109756	-0.256	0.00225366		ENSG00000108950	0.729751	7.91617e-15		ENSG00000124614	-0.16709	0.0152947
ENSG00000104219	-0.127112	2.50406e-05		ENSG00000109790	-0.45442	3.52027e-09		ENSG00000108960	-0.223176	1.49839e-10		ENSG00000124813	-1.05014	4.8003e-23
ENSG00000104312	0.125216	0.000805173		ENSG00000109794	-1.28792	3.15685e-73		ENSG00000109323	0.266266	0.00770758		ENSG00000125089	-0.413007	6.79831e-05
ENSG00000104324	0.150422	0.013829		ENSG00000109906	0.456918	6.34443e-05		ENSG00000109381	0.274285	0.0263197		ENSG00000125249	-0.190252	0.013311
ENSG00000104343	-0.152369	0.0198582		ENSG00000110031	-0.180948	0.000262222		ENSG00000109452	0.195936	0.00482195		ENSG00000125257	-1.21077	1.43652e-27
ENSG00000104361	-0.106365	3.6895e-05		ENSG00000110077	0.708075	5.83826e-14		ENSG00000109458	0.21682	0.0450711		ENSG00000125454	-0.142301	0.0016292
ENSG00000104365	0.130802	0.00250154		ENSG00000110079	1.19238	2.39626e-56		ENSG00000109667	0.632159	3.18211e-13		ENSG00000125730	-1.45445	3.59943e-31
ENSG00000104375	0.137638	0.025405		ENSG00000110090	0.130804	0.000917709		ENSG00000109790	-0.597936	2.16834e-15		ENSG00000125772	-0.265347	0.013311
ENSG00000104447	1.37356	1.11033e-88		ENSG00000110092	-0.186013	4.1809e-05		ENSG00000109794	-1.06184	4.14521e-62		ENSG00000126012	-0.133433	0.0104859
ENSG00000104517	0.168133	0.00215731		ENSG00000110324	0.32182	5.32601e-07		ENSG00000109906	0.507226	0.00076502		ENSG00000126217	-0.853784	1.69578e-28
ENSG00000104613	-0.112098	0.00571005		ENSG00000110583	-0.140326	1.72957e-07		ENSG00000110031	-0.115825	0.0465519		ENSG00000126247	-0.170012	0.000161976
ENSG00000104626	0.150118	1.42934e-07		ENSG00000110651	-0.31122	1.17412e-06		ENSG00000110077	0.681368	1.07884e-09		ENSG00000126261	-0.181571	0.0275647
ENSG00000104763	0.254351	2.86529e-07		ENSG00000110852	0.11448	0.0432727		ENSG00000110079	1.28978	1.0449e-43		ENSG00000126456	-0.123689	0.0109086
ENSG00000104765	0.205238	5.70616e-06		ENSG00000110880	-0.163469	0.00762066		ENSG00000110090	0.17268	0.00124507		ENSG00000126882	-0.138888	0.000308697
ENSG00000104852	-0.100167	0.00506293		ENSG00000110934	-0.424816	5.95997e-19		ENSG00000110092	-0.256254	5.74194e-08		ENSG00000127124	-0.857844	7.07355e-12
ENSG00000104870	0.315521	5.25254e-17		ENSG00000111145	-0.348568	4.32177e-15		ENSG00000110324	0.239627	0.00170428		ENSG00000127125	-0.104855	0.00239448
ENSG00000104972	-0.234501	6.77503e-13		ENSG00000111224	0.201209	1.32393e-05		ENSG00000110651	-0.452245	2.02295e-15		ENSG00000127311	-0.179279	3.95184e-06
ENSG00000105122	-0.204954	2.35606e-26		ENSG00000111275	-0.149519	9.57476e-06		ENSG00000110852	0.130561	0.0382885		ENSG00000127663	-0.28057	0.00181361
ENSG00000105223	0.262008	5.69833e-15		ENSG00000111348	-0.161329	0.00855267		ENSG00000110934	-0.304476	1.11586e-07		ENSG00000127946	0.232381	0.0170776
ENSG00000105246	-0.104862	6.40793e-05		ENSG00000111450	0.13658	0.000337048		ENSG00000111110	0.118262	0.0296778		ENSG00000127980	-0.103201	0.0286564
ENSG00000105329	-0.175659	2.20352e-05		ENSG00000111615	-0.103356	0.00119232		ENSG00000111145	-0.261475	1.03353e-07		ENSG00000128245	-0.281992	0.0410433
ENSG00000105339	-0.95688	4.03747e-52		ENSG00000111640	-0.232676	0.0110538		ENSG00000111224	0.186487	0.00497098		ENSG00000128487	-0.424589	0.000833457
ENSG00000105366	-0.270486	1.56204e-41		ENSG00000111666	0.180189	0.01804		ENSG00000111237	-0.155275	0.00558604		ENSG00000128512	-0.866623	8.3022e-10
ENSG00000105372	-0.197158	7.01901e-05		ENSG00000111790	0.158944	0.0133675		ENSG00000111252	0.206921	0.0300222		ENSG00000128534	-0.142787	0.00830998
ENSG00000105639	-0.389602	4.8339e-27		ENSG00000111846	-0.302439	7.45969e-05		ENSG00000111450	0.179494	0.000109217		ENSG00000128573	-1.53284	5.34471e-33
ENSG00000105656	0.179218	1.47928e-05		ENSG00000111885	1.26016	9.24068e-41		ENSG00000111490	-0.159162	3.87094e-06		ENSG00000128805	-0.677288	1.91711e-06
ENSG00000105698	-0.103882	0.000207196		ENSG00000111912	0.306339	3.85505e-05		ENSG00000111640	-0.231399	0.0231969		ENSG00000128815	-0.499491	5.46265e-08
ENSG00000105810	-0.493026	2.3613e-21		ENSG00000111962	-0.273004	0.000645515		ENSG00000111817	0.249758	0.00855796		ENSG00000128872	-0.205964	0.0159265
ENSG00000105835	1.24604	3.73267e-42		ENSG00000112232	0.499205	5.69198e-11		ENSG00000111846	-0.373781	1.78467e-07		ENSG00000128923	-0.184837	0.0330245
ENSG00000105889	-0.387532	6.44498e-46		ENSG00000112249	-0.25693	0.00202779		ENSG00000111885	1.46236	9.3307e-29		ENSG00000128928	-0.283974	3.22651e-09
ENSG00000105953	0.1838	5.05002e-07		ENSG00000112320	0.167493	0.000121237		ENSG00000111912	0.321006	0.000126667		ENSG00000129084	-0.315682	0.010003
ENSG00000105967	0.133108	0.0165592		ENSG00000112414	0.850444	4.22818e-41		ENSG00000112033	-0.279341	0.00675686		ENSG00000129422	-0.351539	0.00031137
ENSG00000105983	0.151997	0.000246713		ENSG00000112531	-0.210532	0.0414193		ENSG00000112232	0.525987	3.73643e-10		ENSG00000129493	0.224715	0.0102631
ENSG00000106028	-0.105169	0.000333621		ENSG00000112561	-0.222018	5.2368e-06		ENSG00000112249	-0.266209	0.00249316		ENSG00000129515	0.712929	3.45856e-17
ENSG00000106034	-0.387016	3.32392e-09		ENSG00000112685	-0.170725	0.0082099		ENSG00000112320	0.198074	0.00111556		ENSG00000129675	-0.422437	1.05448e-06
ENSG00000106100	-0.105765	2.72834e-06		ENSG00000112697	-0.100576	0.0258125		ENSG00000112414	0.606423	1.20829e-17		ENSG00000130208	-0.273187	3.37635e-05
ENSG00000106266	0.256988	3.13051e-18		ENSG00000112799	-0.736097	2.51125e-22		ENSG00000112425	-0.100917	0.017946		ENSG00000130305	-0.108067	0.00545474
ENSG00000106415	-0.191106	2.17882e-06		ENSG00000112851	0.243131	0.00264705		ENSG00000112561	-0.302912	4.28941e-09		ENSG00000130340	0.396783	0.00241052
ENSG00000106479	-0.123058	5.56533e-08		ENSG00000113163	0.255906	0.0049651		ENSG00000112799	-0.709195	1.79996e-16		ENSG00000130396	-0.259336	4.7176e-07
ENSG00000106524	0.10073	0.000130947		ENSG00000113441	-0.294015	1.52299e-06		ENSG00000112851	0.364814	1.72604e-05		ENSG00000130429	-0.191546	0.0161492
ENSG00000106617	0.256557	8.72495e-05		ENSG00000113580	0.25399	0.00770742		ENSG00000112972	0.123727	0.0431076		ENSG00000130475	-0.293067	1.37004e-12
ENSG00000106665	-0.248023	3.74488e-14		ENSG00000113583	-0.153738	9.65514e-06		ENSG00000113068	0.129832	0.018494		ENSG00000130584	-0.140683	0.0474487
ENSG00000106683	-0.112715	1.0372e-07		ENSG00000113749	-0.218863	0.000339441		ENSG00000113163	0.40999	0.000158392		ENSG00000130830	0.213633	0.0165666
ENSG00000106733	0.159336	7.72466e-08		ENSG00000113851	0.125231	0.0201283		ENSG00000113269	0.318137	0.00349343		ENSG00000131238	-0.179365	0.00606896
ENSG00000106785	0.469016	1.22702e-28		ENSG00000114013	-0.244509	0.0058481		ENSG00000113441	-0.189467	0.0125217		ENSG00000131408	-0.115543	0.000397888
ENSG00000106799	-0.64532	2.95497e-29		ENSG00000114023	-0.116679	8.58886e-06		ENSG00000113504	0.138708	0.0164334		ENSG00000131446	0.32787	0.00388462
ENSG00000106948	-0.202101	5.85781e-10		ENSG00000114423	0.36891	2.36395e-07		ENSG00000113580	0.391564	4.31123e-06		ENSG00000131724	-0.300932	0.0049062
ENSG00000107036	0.12529	0.00951184		ENSG00000114450	-0.435797	6.42864e-09		ENSG00000113583	-0.134878	0.00267154		ENSG00000131773	-0.809481	1.012e-11
ENSG00000107099	-0.928826	4.51291e-55		ENSG00000114541	0.964061	1.59982e-23		ENSG00000114062	0.163343	0.0423188		ENSG00000132122	-0.727315	1.97621e-08
ENSG00000107242	-0.505923	2.17528e-73		ENSG00000114770	0.417113	9.5201e-10		ENSG00000114127	0.168056	0.0445385		ENSG00000132274	-0.266927	0.00181556
ENSG00000107263	-0.291434	9.88282e-07		ENSG00000114861	0.479295	0.000581579		ENSG00000114391	-0.166327	0.0195721		ENSG00000132294	0.439946	9.61998e-06
ENSG00000107341	0.207416	1.73659e-06		ENSG00000114978	-0.201791	0.000187911		ENSG00000114423	0.381762	7.88768e-07		ENSG00000132334	-0.632006	5.2827e-06
ENSG00000107372	0.121962	0.000267176		ENSG00000114999	0.153029	0.00621567		ENSG00000114450	-0.338583	4.25104e-06		ENSG00000132341	-0.120971	0.0129923
ENSG00000107551	-0.244911	3.27371e-08		ENSG00000115107	0.126479	0.0194633		ENSG00000114541	1.05601	3.00337e-26		ENSG00000132359	-0.256279	0.0128334
ENSG00000107643	0.132241	0.00546693		ENSG00000115241	-0.109133	0.00071106		ENSG00000114770	0.435761	2.53264e-10		ENSG00000132507	-0.110416	0.00275743
ENSG00000107679	0.191211	3.19998e-08		ENSG00000115267	0.168879	0.00027222		ENSG00000114784	-0.103217	0.00558465		ENSG00000132612	-0.123673	0.000144885
ENSG00000107719	-1.05156	7.85768e-87		ENSG00000115310	-0.252658	0.00137067		ENSG00000114796	0.219696	0.00341172		ENSG00000132694	0.275948	0.0135187
ENSG00000107736	-0.217091	1.0685e-21		ENSG00000115364	-0.11971	0.000155911		ENSG00000114861	0.834721	4.69279e-15		ENSG00000132965	-0.219609	0.00395292
ENSG00000107738	-0.383886	3.36287e-23		ENSG00000115419	-0.181657	0.038291		ENSG00000114902	-0.121512	4.33298e-06		ENSG00000133030	-0.305721	0.000110245
ENSG00000107745	0.253754	6.18405e-10		ENSG00000115525	0.162503	0.0137515		ENSG00000114942	-0.143053	0.000828253		ENSG00000133121	1.62537	5.15679e-32
ENSG00000107779	-0.121353	0.0108991		ENSG00000115738	-0.248614	4.10393e-05		ENSG00000114978	-0.222444	8.26505e-06		ENSG00000133216	-0.209271	0.00116037
ENSG00000107798	0.151922	0.000161818		ENSG00000115756	0.134212	0.041007		ENSG00000114999	0.244311	0.000229267		ENSG00000133246	-0.39006	1.92823e-06
ENSG00000107863	-0.236729	2.68476e-06		ENSG00000115825	-0.452618	1.36549e-12		ENSG00000115267	0.195934	0.00112825		ENSG00000133275	-0.142765	0.00409335
ENSG00000107957	0.511428	8.61212e-39		ENSG00000115840	-0.181996	3.44196e-05		ENSG00000115268	-0.232456	0.0042233		ENSG00000133313	-0.139594	0.0358409
ENSG00000107968	0.264194	4.82229e-05		ENSG00000115896	-0.341458	9.12113e-06		ENSG00000115364	-0.108962	0.000956937		ENSG00000133657	-0.222968	0.0292587
ENSG00000108175	0.162692	0.000366865		ENSG00000115902	-0.176382	3.37471e-09		ENSG00000115415	0.154553	0.0304118		ENSG00000133800	1.19069	2.37424e-19
ENSG00000108219	-0.327728	1.11341e-12		ENSG00000115919	0.431814	5.52555e-06		ENSG00000115419	-0.266634	0.00229417		ENSG00000133805	-0.252913	0.00762577
ENSG00000108256	0.178507	0.000697235		ENSG00000115956	0.188752	0.0163204		ENSG00000115738	-0.256077	9.8522e-05		ENSG00000133812	0.485191	5.24734e-05
ENSG00000108298	-0.220492	9.42238e-07		ENSG00000115977	0.204423	0.037278		ENSG00000115756	0.171263	0.0302224		ENSG00000133835	0.2161	0.014345
ENSG00000108306	0.152278	0.000660425		ENSG00000116044	0.315148	0.000177267		ENSG00000115825	-0.445332	5.66376e-10		ENSG00000134243	-0.323803	0.00425737
ENSG00000108518	-0.107322	3.3715e-05		ENSG00000116095	-0.104221	0.000480234		ENSG00000115896	-0.285576	0.00103848		ENSG00000134245	-0.212138	0.00950168
ENSG00000108599	0.174728	0.000339392		ENSG00000116117	-0.22443	0.00115059		ENSG00000115919	0.489242	6.78409e-07		ENSG00000134250	0.348667	8.79738e-05
ENSG00000108639	-0.108939	4.9787e-08		ENSG00000116191	-0.440294	3.60889e-17		ENSG00000115977	0.34808	0.000408078		ENSG00000134352	-0.786068	1.90474e-13
ENSG00000108654	-0.178911	0.00167395		ENSG00000116260	-0.103761	0.00385215		ENSG00000116044	0.376527	1.58347e-05		ENSG00000134532	-0.229809	0.0339914
ENSG00000108669	0.657547	2.76477e-31		ENSG00000116473	-0.202009	0.0357793		ENSG00000116117	-0.253765	0.000615906		ENSG00000134574	-0.214575	0.00394393
ENSG00000108798	-0.218112	5.15701e-24		ENSG00000116641	0.382677	5.34915e-08		ENSG00000116191	-0.400222	1.8767e-11		ENSG00000134686	-0.357905	0.00468194
ENSG00000108854	-0.105235	0.0300127		ENSG00000116679	0.305877	3.74688e-06		ENSG00000116251	-0.154274	0.0190106		ENSG00000134909	-0.307452	0.000937142
ENSG00000108861	0.104047	3.11637e-06		ENSG00000116711	-0.400485	6.4503e-08		ENSG00000116260	-0.147932	4.96728e-06		ENSG00000134987	0.229596	0.00879424
ENSG00000108950	0.725378	3.24505e-41		ENSG00000116729	0.644564	1.61736e-22		ENSG00000116641	0.369875	4.80719e-07		ENSG00000135048	0.673184	1.04026e-05
ENSG00000108960	-0.189129	9.36455e-15		ENSG00000116815	-0.200064	0.000239146		ENSG00000116679	0.316634	1.79348e-05		ENSG00000135090	0.299992	0.0311281
ENSG00000109046	0.137192	0.00535675		ENSG00000116918	-0.121165	0.00569664		ENSG00000116701	0.142218	0.00670894		ENSG00000135363	-0.306968	4.87359e-05
ENSG00000109323	0.19218	0.000867939		ENSG00000116991	-0.694769	1.9773e-19		ENSG00000116711	-0.434308	1.6464e-10		ENSG00000135404	-0.161417	0.0336941
ENSG00000109332	0.155025	0.0022517		ENSG00000117020	-0.678194	8.83209e-17		ENSG00000116729	0.620315	3.89093e-14		ENSG00000135540	0.517127	0.00294999
ENSG00000109339	-0.172577	5.92629e-06		ENSG00000117114	0.2378	0.00111108		ENSG00000116754	0.168905	0.0176621		ENSG00000135596	-0.146738	0.0145874
ENSG00000109381	0.224552	0.000109189		ENSG00000117115	-0.946057	2.69802e-24		ENSG00000116815	-0.191568	0.0106284		ENSG00000135605	0.265677	0.000301101
ENSG00000109452	0.128539	0.000274678		ENSG00000117154	-1.08648	9.99085e-44		ENSG00000116918	-0.120079	0.0317269		ENSG00000135678	0.716988	3.63543e-06
ENSG00000109458	0.13204	0.0240315		ENSG00000117174	-0.110942	0.0198244		ENSG00000116991	-0.559737	4.04011e-09		ENSG00000135679	-0.262942	0.00878673
ENSG00000109475	-0.111281	0.0184101		ENSG00000117280	-0.12171	0.00122573		ENSG00000117020	-0.496235	1.00852e-06		ENSG00000135749	-1.01543	7.67463e-30
ENSG00000109654	-0.101206	0.000217387		ENSG00000117505	-0.125818	0.00569899		ENSG00000117114	0.19296	0.0125454		ENSG00000135766	-0.248199	0.00240614
ENSG00000109667	0.544406	3.42844e-25		ENSG00000117676	-0.267175	8.07787e-08		ENSG00000117115	-0.871507	2.15497e-40		ENSG00000135829	-0.246615	0.000908536
ENSG00000109790	-0.561145	1.05894e-37		ENSG00000117697	-0.146858	0.0245203		ENSG00000117154	-1.04175	7.80444e-33		ENSG00000135837	-0.261462	0.0481664
ENSG00000109794	-1.18868	3.75295e-189		ENSG00000117859	0.241979	0.000441566		ENSG00000117280	-0.141783	1.58347e-05		ENSG00000135842	-0.544254	6.29727e-09
ENSG00000109906	0.596359	1.47086e-15		ENSG00000118257	0.453563	2.93477e-10		ENSG00000117335	0.196044	0.000795394		ENSG00000135899	-0.351881	0.000155586
ENSG00000110031	-0.101482	0.00291909		ENSG00000118263	0.536193	1.90543e-15		ENSG00000117676	-0.305096	2.17255e-09		ENSG00000135905	-0.81375	1.1126e-09
ENSG00000110077	0.610198	1.04978e-24		ENSG00000118418	-0.139872	0.0235202		ENSG00000117859	0.331386	3.35805e-05		ENSG00000135924	-0.1755	0.000837017
ENSG00000110079	1.15286	1.68034e-89		ENSG00000118515	-0.362975	1.76908e-05		ENSG00000118181	-0.211874	0.00298943		ENSG00000136044	-0.409368	0.000453759
ENSG00000110090	0.201851	9.77253e-14		ENSG00000118689	0.553256	2.22375e-10		ENSG00000118257	0.543689	6.14155e-11		ENSG00000136048	0.598061	2.38247e-09
ENSG00000110092	-0.225785	5.16757e-28		ENSG00000118690	0.225764	3.29538e-07		ENSG00000118263	0.59652	1.04131e-12		ENSG00000136141	-0.287024	0.0141219
ENSG00000110324	0.295515	2.75658e-13		ENSG00000118762	-0.509501	1.2816e-17		ENSG00000118418	-0.13983	0.00864424		ENSG00000136153	-0.28494	9.92535e-06
ENSG00000110422	0.120009	0.0138933		ENSG00000118785	-2.3151	1.30551e-65		ENSG00000118515	-0.371947	1.2928e-08		ENSG00000136156	-0.412314	4.35737e-05
ENSG00000110583	-0.115152	2.29553e-12		ENSG00000118855	0.297699	0.000113451		ENSG00000118564	0.273448	0.000999778		ENSG00000136238	-0.361717	8.96995e-05
ENSG00000110651	-0.320491	2.26893e-18		ENSG00000118922	-0.325626	6.96438e-10		ENSG00000118689	0.518042	1.00592e-06		ENSG00000136295	0.176338	0.0316349
ENSG00000110852	0.101505	0.00313569		ENSG00000118960	0.100041	0.012907		ENSG00000118690	0.182	0.00036069		ENSG00000136404	-0.372322	3.70383e-05
ENSG00000110934	-0.326057	2.46602e-28		ENSG00000119231	0.216369	0.000329998		ENSG00000118762	-0.376833	9.26833e-08		ENSG00000136603	-0.418021	5.73157e-07
ENSG00000111110	0.106328	0.000233285		ENSG00000119522	0.77762	1.49363e-24		ENSG00000118785	-2.16973	7.97878e-35		ENSG00000136717	-0.913865	1.09197e-20
ENSG00000111145	-0.294471	7.9145e-29		ENSG00000119535	-0.587547	1.33761e-20		ENSG00000118855	0.513454	5.59268e-11		ENSG00000136754	-0.224233	0.0362905
ENSG00000111224	0.191505	3.42919e-10		ENSG00000119638	-0.119937	0.0102765		ENSG00000118922	-0.328138	2.27936e-09		ENSG00000136888	-0.121216	0.00786141
ENSG00000111252	0.217439	3.16173e-06		ENSG00000119865	0.144273	0.000471286		ENSG00000119335	-0.12636	0.00176767		ENSG00000137154	-0.302882	0.00762359
ENSG00000111348	-0.211322	1.73048e-13		ENSG00000119950	0.106588	0.0201344		ENSG00000119397	0.212101	0.0102533		ENSG00000137161	-0.182091	0.00229769
ENSG00000111450	0.170363	5.02402e-14		ENSG00000120063	0.449591	1.33175e-05		ENSG00000119522	0.663601	2.23753e-12		ENSG00000137393	0.557677	0.000219696
ENSG00000111490	-0.138326	1.70459e-09		ENSG00000120162	0.347795	6.15128e-06		ENSG00000119535	-0.481392	1.56073e-13		ENSG00000137478	0.880711	7.98733e-12
ENSG00000111640	-0.213585	5.15053e-05		ENSG00000120254	-0.929026	1.38134e-26		ENSG00000119705	-0.121542	0.00325376		ENSG00000137575	0.400968	0.005185
ENSG00000111666	0.244715	2.01136e-08		ENSG00000120594	-1.02246	5.94335e-31		ENSG00000119729	0.242705	0.00393169		ENSG00000137642	-1.59075	1.45498e-29
ENSG00000111846	-0.302041	3.11918e-15		ENSG00000120742	-0.108533	0.0271453		ENSG00000119865	0.206542	0.000993159		ENSG00000137726	-0.197591	0.00936644
ENSG00000111885	1.33623	7.22756e-75		ENSG00000120800	-0.103049	0.0299552		ENSG00000120063	0.359621	0.00031519		ENSG00000137818	-0.326584	0.0218886
ENSG00000111912	0.263023	1.83458e-09		ENSG00000120889	-0.182916	0.000495107		ENSG00000120129	0.199853	0.0430198		ENSG00000137831	0.312197	3.5474e-05
ENSG00000111962	-0.297841	1.31602e-10		ENSG00000120896	0.151123	9.29083e-05		ENSG00000120162	0.473587	4.3982e-09		ENSG00000137841	-0.292846	5.0877e-05
ENSG00000112033	-0.225211	5.56597e-05		ENSG00000120963	0.153398	0.0125121		ENSG00000120254	-0.851111	1.75787e-23		ENSG00000137845	-0.421986	5.6524e-05
ENSG00000112062	0.198955	2.30798e-05		ENSG00000120992	-0.133315	0.0191408		ENSG00000120594	-1.0683	4.40093e-26		ENSG00000137944	-0.232976	1.2547e-06
ENSG00000112137	0.125085	0.0285031		ENSG00000121064	-0.188821	8.72628e-07		ENSG00000120690	0.217232	0.0353918		ENSG00000137955	-0.107458	0.0406141
ENSG00000112232	0.557582	3.57917e-31		ENSG00000121210	-0.188668	0.0164137		ENSG00000120742	-0.133838	0.0334748		ENSG00000137959	0.342332	0.0317682
ENSG00000112249	-0.195604	0.000230257		ENSG00000121281	-0.183223	0.00987695		ENSG00000120868	-0.195378	0.00609283		ENSG00000137965	0.309726	0.00150467
ENSG00000112320	0.123871	1.07772e-06		ENSG00000121310	-0.151446	0.000191995		ENSG00000120889	-0.17474	0.00177665		ENSG00000138069	0.290785	0.00293533
ENSG00000112335	0.147872	0.000396762		ENSG00000121542	-0.143838	0.0313528		ENSG00000120896	0.196762	5.69535e-05		ENSG00000138101	-0.316516	0.0309609
ENSG00000112414	0.760695	2.32936e-69		ENSG00000121691	0.106826	0.0144267		ENSG00000120899	0.253935	0.00985198		ENSG00000138119	-0.538977	4.69232e-10
ENSG00000112531	-0.174921	0.00300981		ENSG00000121895	-0.899468	6.3878e-51		ENSG00000120963	0.286022	7.82444e-06		ENSG00000138134	-0.328574	5.80001e-05
ENSG00000112561	-0.178623	3.18884e-10		ENSG00000121933	-0.499354	8.7466e-27		ENSG00000120992	-0.206427	0.000807936		ENSG00000138182	-0.108448	0.0488999
ENSG00000112624	-0.148545	0.000435132		ENSG00000121964	0.626554	1.20148e-12		ENSG00000121064	-0.217338	1.22452e-08		ENSG00000138185	-0.508546	0.000109614
ENSG00000112679	0.11296	0.00056202		ENSG00000121988	-0.121097	0.018291		ENSG00000121210	-0.270853	0.00118251		ENSG00000138190	-0.279984	0.0146973
ENSG00000112699	-0.131412	0.0265174		ENSG00000121989	0.156064	0.00742237		ENSG00000121542	-0.136841	0.0353918		ENSG00000138448	-0.285434	0.0145186
ENSG00000112799	-0.670333	2.43043e-43		ENSG00000122034	-0.110337	0.0112088		ENSG00000121691	0.125448	0.0162314		ENSG00000138640	0.358614	0.00763366
ENSG00000112851	0.263028	4.6753e-07		ENSG00000122042	-0.2444	0.000370185		ENSG00000121749	0.200897	0.00105112		ENSG00000138670	0.271266	0.0298673
ENSG00000113163	0.355698	2.43471e-09		ENSG00000122122	-0.16201	3.58917e-07		ENSG00000121895	-0.975624	3.32554e-74		ENSG00000138735	-0.121928	0.00980907
ENSG00000113269	0.312843	1.33502e-09		ENSG00000122490	0.116929	0.0252989		ENSG00000121933	-0.473991	2.02e-26		ENSG00000138756	-0.487978	0.000601145
ENSG00000113273	0.161416	0.00107542		ENSG00000122783	-0.124928	0.000265392		ENSG00000121964	0.758424	4.71037e-16		ENSG00000138758	0.282135	0.00337386
ENSG00000113441	-0.162766	1.59445e-05		ENSG00000122862	0.590029	0.000147189		ENSG00000121988	-0.127646	0.0379857		ENSG00000138760	0.27148	0.00408983
ENSG00000113504	0.10113	0.000215478		ENSG00000122958	0.215142	0.000190328		ENSG00000121989	0.126737	0.0498509		ENSG00000139117	0.776782	4.99451e-19
ENSG00000113580	0.336655	2.58542e-11		ENSG00000123066	-0.210629	0.0254869		ENSG00000122026	-0.19727	0.0220615		ENSG00000139146	-0.124883	0.0292929
ENSG00000113583	-0.12588	2.30852e-09		ENSG00000123094	-1.43937	4.03225e-64		ENSG00000122034	-0.12644	0.00281031		ENSG00000139182	-0.137495	0.0160102
ENSG00000113749	-0.120292	0.00316795		ENSG00000123095	-0.969865	6.56712e-41		ENSG00000122042	-0.181335	0.0417679		ENSG00000139644	-0.185539	0.0478594
ENSG00000113916	-0.144115	0.00610593		ENSG00000123104	-0.811467	4.06063e-17		ENSG00000122376	0.228619	0.00160252		ENSG00000139679	-0.279468	0.0163466
ENSG00000114013	-0.223717	5.76993e-06		ENSG00000123106	0.290308	0.00160175		ENSG00000122406	-0.20888	0.00337433		ENSG00000139726	-0.252156	5.72464e-05
ENSG00000114062	0.153208	0.000148927		ENSG00000123124	0.832204	4.32554e-20		ENSG00000122707	-0.199229	0.00183054		ENSG00000139832	0.40627	0.000123759
ENSG00000114391	-0.111918	0.00459743		ENSG00000123213	0.218831	0.000151169		ENSG00000122779	-0.121063	0.0213402		ENSG00000139971	-0.365371	1.79281e-06
ENSG00000114423	0.407923	2.82521e-21		ENSG00000123338	-0.253106	0.000463714		ENSG00000122862	0.698039	1.33541e-05		ENSG00000139974	0.726285	2.57237e-14
ENSG00000114450	-0.357536	2.2726e-18		ENSG00000123416	-0.296452	0.00157189		ENSG00000123094	-1.47266	6.44092e-91		ENSG00000140022	0.211767	0.0145792
ENSG00000114541	0.641803	7.03866e-28		ENSG00000123643	0.203434	1.54175e-05		ENSG00000123095	-1.03661	1.4259e-65		ENSG00000140264	-0.257444	0.00394393
ENSG00000114573	0.104586	0.00676998		ENSG00000123933	-0.114926	0.0106898		ENSG00000123104	-0.743783	2.46473e-13		ENSG00000140332	-0.281829	2.29848e-05
ENSG00000114770	0.376088	3.13092e-20		ENSG00000124126	-0.420067	4.83781e-06		ENSG00000123106	0.477739	2.03958e-08		ENSG00000140575	0.740025	8.06931e-12
ENSG00000114796	0.196001	1.97825e-06		ENSG00000124151	0.199585	0.0290384		ENSG00000123124	0.823094	7.44239e-16		ENSG00000140577	0.295799	5.09542e-05
ENSG00000114861	0.626843	1.6548e-18		ENSG00000124160	-0.201176	3.25381e-06		ENSG00000123213	0.202392	0.00467951		ENSG00000140678	-0.368688	4.00267e-05
ENSG00000114978	-0.188748	5.19817e-10		ENSG00000124225	-0.190702	6.90225e-05		ENSG00000123338	-0.204818	0.0217014		ENSG00000140749	-0.131426	0.000144885
ENSG00000114999	0.242017	4.89972e-14		ENSG00000124313	-0.107692	0.00479106		ENSG00000123349	-0.151814	0.0109672		ENSG00000140750	-0.260194	0.00254867
ENSG00000115020	0.221819	5.20781e-07		ENSG00000124486	0.259466	7.36505e-05		ENSG00000123352	0.146642	0.0364465		ENSG00000140968	-0.495729	4.94986e-08
ENSG00000115091	-0.128301	0.00572781		ENSG00000124491	3.38511	7.21421e-124		ENSG00000123360	-0.101098	1.86381e-05		ENSG00000141068	-0.230567	0.00141391
ENSG00000115267	0.138962	7.68566e-08		ENSG00000124496	-0.455945	5.25849e-15		ENSG00000123384	0.234886	0.0116592		ENSG00000141298	-0.490827	0.00483998
ENSG00000115268	-0.120068	0.0118603		ENSG00000124587	-0.100049	0.000351691		ENSG00000123416	-0.312566	0.00598486		ENSG00000141378	-0.156689	0.000219325
ENSG00000115310	-0.124637	0.0150655		ENSG00000124762	-0.13678	0.0182045		ENSG00000123643	0.262378	5.4646e-06		ENSG00000141441	-0.72004	1.22365e-11
ENSG00000115355	0.101727	0.0490886		ENSG00000124813	-1.03722	2.547e-52		ENSG00000123908	0.168634	0.00628734		ENSG00000141458	-0.30721	6.97238e-05
ENSG00000115415	0.124901	0.0004638		ENSG00000125037	-0.101955	0.00297401		ENSG00000123933	-0.11794	0.0249432		ENSG00000141519	-0.111482	0.0387149
ENSG00000115525	0.143352	0.000238171		ENSG00000125089	-0.168247	0.0365127		ENSG00000123983	0.176055	0.0231969		ENSG00000141526	-0.149728	0.0360099
ENSG00000115738	-0.159185	3.65191e-05		ENSG00000125249	-0.147484	0.0122925		ENSG00000124126	-0.56307	2.31754e-07		ENSG00000141664	0.291735	0.00936644
ENSG00000115756	0.204032	2.39119e-08		ENSG00000125257	-1.43757	6.47719e-75		ENSG00000124151	0.348325	0.000165867		ENSG00000141837	-0.695225	4.99612e-10
ENSG00000115760	0.146111	0.0083371		ENSG00000125447	-0.135578	0.00120931		ENSG00000124160	-0.159989	0.00339109		ENSG00000141968	-0.31243	0.000914438
ENSG00000115825	-0.44104	4.05253e-29		ENSG00000125454	-0.17453	2.04049e-09		ENSG00000124172	-0.234265	0.000103743		ENSG00000142039	-0.106398	0.000456562
ENSG00000115840	-0.140987	2.80394e-07		ENSG00000125633	0.193939	0.00115059		ENSG00000124225	-0.233998	6.67102e-13		ENSG00000142303	-0.176611	0.00037653
ENSG00000115896	-0.412061	1.99606e-18		ENSG00000125730	-1.56822	3.22666e-97		ENSG00000124299	0.137238	0.0483568		ENSG00000142347	-0.296238	0.0481664
ENSG00000115902	-0.109251	1.25467e-07		ENSG00000125772	-0.341461	6.98345e-07		ENSG00000124486	0.267245	0.00220159		ENSG00000142512	-0.345926	4.62955e-15
ENSG00000115904	0.112573	0.033399		ENSG00000125779	-0.22416	1.33175e-05		ENSG00000124491	3.65179	2.42336e-129		ENSG00000142583	-0.707891	3.74978e-07
ENSG00000115919	0.486403	4.65905e-17		ENSG00000125810	0.118895	0.0354952		ENSG00000124496	-0.292671	9.9523e-09		ENSG00000142634	-0.125293	0.0260183
ENSG00000115970	0.123939	0.010495		ENSG00000125844	0.147039	0.020839		ENSG00000124614	-0.11366	0.0225022		ENSG00000143079	-0.282935	0.00291096
ENSG00000115977	0.279595	1.8034e-07		ENSG00000125966	-0.109371	0.00114109		ENSG00000124762	-0.19285	0.00023472		ENSG00000143119	-0.2856	0.0159265
ENSG00000116044	0.369215	5.1795e-14		ENSG00000126217	-1.11661	1.44844e-86		ENSG00000124783	-0.144416	0.00139008		ENSG00000143156	-0.1244	0.00421062
ENSG00000116117	-0.175015	9.85668e-05		ENSG00000127124	-1.06329	2.20875e-31		ENSG00000124813	-1.04947	3.64534e-41		ENSG00000143158	-0.136943	0.0319514
ENSG00000116191	-0.319719	1.0125e-18		ENSG00000127603	0.196532	0.0213487		ENSG00000124831	0.217815	0.040386		ENSG00000143164	-0.45266	0.000151478
ENSG00000116350	0.105956	0.0109883		ENSG00000127663	-0.208693	0.000496024		ENSG00000125089	-0.38063	6.34276e-07		ENSG00000143179	-0.218138	4.25339e-09
ENSG00000116473	-0.160472	0.00896653		ENSG00000127946	0.306304	1.78554e-08		ENSG00000125124	0.101211	0.0230925		ENSG00000143344	1.16318	9.1595e-16
ENSG00000116641	0.4284	2.7221e-23		ENSG00000127947	0.259509	0.00132474		ENSG00000125249	-0.200916	0.000229717		ENSG00000143549	-0.232899	0.00786141
ENSG00000116679	0.308173	9.62163e-16		ENSG00000127989	-0.144305	0.00786029		ENSG00000125257	-1.31895	3.41952e-59		ENSG00000143641	-0.445973	0.000103394
ENSG00000116701	0.133819	2.99177e-06		ENSG00000128245	-0.293776	3.83068e-05		ENSG00000125354	-0.177506	0.00262101		ENSG00000143669	-0.346892	0.00205476
ENSG00000116711	-0.386847	1.01007e-20		ENSG00000128294	0.189029	0.000745759		ENSG00000125386	0.180737	0.0301693		ENSG00000143776	0.231773	0.0153327
ENSG00000116729	0.741452	2.17008e-63		ENSG00000128487	-0.688929	5.10572e-23		ENSG00000125454	-0.162686	8.49041e-08		ENSG00000143799	-0.143848	0.00421062
ENSG00000116815	-0.205869	4.99852e-08		ENSG00000128512	-0.868247	1.83855e-15		ENSG00000125458	-0.135695	2.11399e-07		ENSG00000143924	-0.569834	4.67867e-08
ENSG00000116918	-0.157505	1.8221e-07		ENSG00000128534	-0.132759	0.000157681		ENSG00000125505	-0.121313	0.0047987		ENSG00000143951	0.29255	0.00950168
ENSG00000116991	-0.560521	3.75262e-26		ENSG00000128573	-1.72539	4.23219e-115		ENSG00000125633	0.171111	0.0139773		ENSG00000144028	-0.125401	0.0330086
ENSG00000117020	-0.472085	2.93488e-21		ENSG00000128595	0.163691	0.000880624		ENSG00000125691	-0.250755	0.000170184		ENSG00000144218	0.310147	0.0329136
ENSG00000117114	0.285944	3.72354e-10		ENSG00000128805	-0.574113	2.47136e-09		ENSG00000125730	-1.68064	2.17636e-120		ENSG00000144228	-0.191534	0.0380462
ENSG00000117115	-0.973564	2.75932e-102		ENSG00000128815	-0.618411	4.22082e-18		ENSG00000125772	-0.340695	2.52274e-08		ENSG00000144451	-0.163285	0.00139149
ENSG00000117154	-1.01063	2.09412e-73		ENSG00000128872	-0.145652	0.00874658		ENSG00000125779	-0.14871	0.0177172		ENSG00000144504	-0.16922	0.0259992
ENSG00000117280	-0.113428	2.45173e-08		ENSG00000128923	-0.206041	1.00616e-06		ENSG00000126217	-0.992222	1.61784e-66		ENSG00000144635	-0.144556	0.0211317
ENSG00000117335	0.116044	0.00215503		ENSG00000128928	-0.173411	3.12721e-05		ENSG00000126653	0.199386	0.00713494		ENSG00000144668	-0.375802	0.00542017
ENSG00000117625	0.125463	0.00168206		ENSG00000129071	-0.112424	0.0241581		ENSG00000126804	0.189161	0.020017		ENSG00000144677	0.29965	0.00230256
ENSG00000117676	-0.271789	6.4327e-19		ENSG00000129084	-0.387033	5.20671e-07		ENSG00000127124	-1.07107	1.09471e-27		ENSG00000144711	0.337588	0.000142964
ENSG00000117859	0.196279	4.79254e-06		ENSG00000129158	-0.140706	0.0417438		ENSG00000127314	0.270144	0.00282588		ENSG00000144746	-0.225853	0.000394741
ENSG00000117868	0.110073	0.00229492		ENSG00000129422	-0.284682	4.31756e-05		ENSG00000127603	0.251295	0.00776763		ENSG00000144791	0.436174	5.45123e-06
ENSG00000118181	-0.168549	5.37356e-06		ENSG00000129450	-0.14697	0.00160175		ENSG00000127663	-0.192422	0.00878754		ENSG00000144893	-0.285798	5.76058e-06
ENSG00000118257	0.446024	1.60501e-23		ENSG00000129515	0.882945	9.72633e-43		ENSG00000127914	0.194454	0.0115692		ENSG00000144935	-0.150889	0.0135273
ENSG00000118263	0.53269	1.15309e-29		ENSG00000129534	-0.216006	0.0051731		ENSG00000127946	0.423177	2.51076e-09		ENSG00000145246	-0.20728	0.0267645
ENSG00000118308	-0.112292	0.0312321		ENSG00000129667	-0.351755	2.00944e-06		ENSG00000127947	0.346356	1.57795e-05		ENSG00000145349	-0.494756	3.6765e-05
ENSG00000118515	-0.331666	5.68909e-21		ENSG00000129675	-0.322955	2.85634e-06		ENSG00000127989	-0.129281	0.0237868		ENSG00000145431	0.691156	3.75505e-05
ENSG00000118564	0.251315	3.53594e-09		ENSG00000130021	-0.141395	0.000516411		ENSG00000128245	-0.296932	0.000663492		ENSG00000145569	-0.261606	0.0008619
ENSG00000118689	0.462815	1.45574e-14		ENSG00000130066	0.327742	0.0153626		ENSG00000128294	0.167837	0.00415316		ENSG00000145685	-1.24243	3.07911e-17
ENSG00000118690	0.20386	2.14178e-12		ENSG00000130208	-0.201842	0.0018674		ENSG00000128487	-0.573087	8.12854e-11		ENSG00000145703	1.38783	1.3654e-28
ENSG00000118762	-0.500911	1.56612e-39		ENSG00000130340	0.659727	3.39109e-17		ENSG00000128512	-0.814768	1.74476e-10		ENSG00000145725	0.225194	0.032201
ENSG00000118785	-2.27688	7.41657e-135		ENSG00000130396	-0.219012	9.62883e-07		ENSG00000128524	-0.102373	0.000320477		ENSG00000145741	-0.139675	0.0023596
ENSG00000118855	0.340536	1.4934e-12		ENSG00000130475	-0.173434	8.92884e-08		ENSG00000128534	-0.110122	0.00944143		ENSG00000145779	0.441632	7.60885e-05
ENSG00000118922	-0.250412	7.86692e-18		ENSG00000130479	-0.127113	0.000166092		ENSG00000128573	-1.54201	1.39202e-76		ENSG00000145819	-0.591678	4.00177e-05
ENSG00000118960	0.137488	5.47112e-09		ENSG00000130517	-0.127411	0.000262222		ENSG00000128595	0.172026	0.00424545		ENSG00000146090	-1.10423	6.71562e-48
ENSG00000118961	0.166454	2.54092e-06		ENSG00000130584	-0.144226	0.000754292		ENSG00000128699	0.19649	0.0047987		ENSG00000146376	1.12149	3.18406e-16
ENSG00000118985	-0.148658	0.0470062		ENSG00000130775	0.173556	0.00222327		ENSG00000128805	-0.725966	1.25939e-12		ENSG00000146416	-0.326198	0.00211602
ENSG00000119471	0.110989	0.00030534		ENSG00000130844	0.237455	0.0241818		ENSG00000128815	-0.439325	2.03376e-07		ENSG00000146457	-0.153818	0.0212328
ENSG00000119522	0.600927	2.6207e-24		ENSG00000130985	-0.117219	0.00315071		ENSG00000128829	0.163789	0.034352		ENSG00000146555	-1.17404	7.41332e-23
ENSG00000119535	-0.397669	5.28505e-26		ENSG00000131018	0.182159	0.0059045		ENSG00000128872	-0.196164	0.000238592		ENSG00000146828	-0.239292	2.88668e-06
ENSG00000119655	0.158206	1.76229e-05		ENSG00000131067	-0.131486	0.00295035		ENSG00000128923	-0.211434	6.11723e-05		ENSG00000147010	-0.440821	0.00014852
ENSG00000119729	0.376537	1.15131e-15		ENSG00000131089	-0.111008	0.0264203		ENSG00000128928	-0.24907	5.0508e-12		ENSG00000147202	-0.37897	0.00250927
ENSG00000119787	0.107003	0.00250578		ENSG00000131149	-0.106365	0.0413064		ENSG00000129084	-0.323815	5.67897e-05		ENSG00000147324	0.292165	0.00129556
ENSG00000119865	0.251801	1.33444e-15		ENSG00000131238	-0.174324	0.00035792		ENSG00000129422	-0.290538	0.000424244		ENSG00000147403	-0.314786	0.00623656
ENSG00000119899	0.130479	1.33742e-05		ENSG00000131374	0.377245	3.77745e-05		ENSG00000129450	-0.166579	0.00381154		ENSG00000147454	-0.611307	1.28048e-06
ENSG00000120063	0.448321	6.80097e-15		ENSG00000131375	0.186068	0.0036177		ENSG00000129515	0.908241	3.83644e-29		ENSG00000147604	-0.241598	0.00365921
ENSG00000120129	0.226161	1.37605e-06		ENSG00000131446	0.530629	1.22626e-12		ENSG00000129667	-0.40856	0.000101255		ENSG00000148180	-0.422161	0.000260265
ENSG00000120162	0.375853	1.78799e-13		ENSG00000131508	-0.174728	0.00773095		ENSG00000129675	-0.308045	2.5064e-05		ENSG00000148341	-0.10519	0.0367221
ENSG00000120254	-0.931813	1.24658e-59		ENSG00000131724	-0.17441	0.0343581		ENSG00000130203	-0.538144	1.58478e-07		ENSG00000148362	-0.110444	0.0461745
ENSG00000120306	0.19011	4.55563e-11		ENSG00000131773	-0.915871	3.40324e-22		ENSG00000130208	-0.276648	4.44696e-13		ENSG00000148429	-0.729474	4.75312e-12
ENSG00000120594	-0.93816	2.42825e-53		ENSG00000132122	-0.509215	2.60846e-07		ENSG00000130332	-0.100089	0.00499124		ENSG00000148516	-0.453043	8.83121e-06
ENSG00000120690	0.177691	0.000786432		ENSG00000132199	0.136697	0.0140907		ENSG00000130340	0.626344	2.63518e-14		ENSG00000148908	-0.394811	1.90472e-06
ENSG00000120868	-0.104138	0.0181609		ENSG00000132256	-0.116342	0.00085318		ENSG00000130396	-0.183441	1.24077e-05		ENSG00000149177	-0.540005	1.27617e-05
ENSG00000120885	-0.162637	0.0216786		ENSG00000132274	-0.342606	7.76977e-11		ENSG00000130429	-0.190003	0.000905383		ENSG00000149256	-0.789678	3.53029e-17
ENSG00000120889	-0.110773	0.00192568		ENSG00000132294	0.449822	2.29059e-13		ENSG00000130475	-0.170471	2.65354e-07		ENSG00000149269	-0.385549	3.39933e-05
ENSG00000120896	0.153662	2.49995e-11		ENSG00000132334	-0.499204	2.63626e-06		ENSG00000130479	-0.112028	0.00236129		ENSG00000149273	-0.216444	0.0470569
ENSG00000120899	0.257204	1.72425e-07		ENSG00000132359	-0.314316	6.61846e-08		ENSG00000130517	-0.112456	0.0106204		ENSG00000149357	-0.111299	0.0399379
ENSG00000120963	0.248037	2.88584e-10		ENSG00000132530	0.190197	0.0310776		ENSG00000130559	-0.154426	0.00214331		ENSG00000150337	-0.467629	6.2652e-08
ENSG00000121064	-0.189862	1.2392e-18		ENSG00000132589	-0.205237	1.62471e-05		ENSG00000130584	-0.179107	0.000105927		ENSG00000150527	-0.385578	4.30578e-09
ENSG00000121067	0.108603	0.0050289		ENSG00000132716	-0.10888	0.0134508		ENSG00000130775	0.161672	0.0107966		ENSG00000150540	0.394958	9.98617e-06
ENSG00000121210	-0.197884	7.97132e-06		ENSG00000132965	-0.189175	4.47129e-05		ENSG00000130830	0.26351	1.61394e-06		ENSG00000150636	-0.16677	0.0136107
ENSG00000121274	0.169171	6.12694e-05		ENSG00000133030	-0.258285	1.86895e-07		ENSG00000130844	0.242988	0.00796123		ENSG00000150938	0.209516	0.00250927
ENSG00000121281	-0.190772	5.95167e-06		ENSG00000133056	-0.172958	5.3814e-09		ENSG00000131018	0.16191	0.0440233		ENSG00000150995	-0.440544	3.04628e-05
ENSG00000121741	0.128958	0.019055		ENSG00000133106	0.395465	0.000120431		ENSG00000131067	-0.148762	0.000402455		ENSG00000151090	1.06596	3.18704e-21
ENSG00000121749	0.119528	0.0015668		ENSG00000133121	2.10533	1.39715e-90		ENSG00000131089	-0.145032	0.00415858		ENSG00000151240	0.588798	2.08279e-06
ENSG00000121774	0.102184	0.0175203		ENSG00000133216	-0.193886	0.00030171		ENSG00000131238	-0.240507	4.56374e-12		ENSG00000151466	-0.262485	0.00870498
ENSG00000121879	0.114027	0.0146856		ENSG00000133226	-0.12063	0.0242611		ENSG00000131374	0.281459	0.0235561		ENSG00000151474	-1.26794	6.07087e-18
ENSG00000121895	-0.956553	1.29076e-154		ENSG00000133246	-0.599421	1.62516e-44		ENSG00000131408	-0.109724	6.01302e-05		ENSG00000151694	-0.206735	0.0248351
ENSG00000121933	-0.382378	2.17931e-39		ENSG00000133275	-0.143833	8.05593e-06		ENSG00000131446	0.54597	1.00006e-09		ENSG00000151726	0.844361	6.68841e-05
ENSG00000121964	0.697408	2.70261e-32		ENSG00000133313	-0.143778	0.00203588		ENSG00000131469	-0.167132	0.0172137		ENSG00000151914	-0.420611	0.00100006
ENSG00000121988	-0.107772	0.000173589		ENSG00000133612	0.172382	0.00053424		ENSG00000131508	-0.239571	0.000591665		ENSG00000152092	-0.111859	0.0149364
ENSG00000121989	0.16751	5.82713e-06		ENSG00000133800	1.62388	1.12854e-82		ENSG00000131724	-0.256067	0.00158683		ENSG00000152102	-0.162921	0.0162736
ENSG00000122034	-0.116568	6.79487e-08		ENSG00000133805	-0.242638	2.66471e-06		ENSG00000131773	-0.844861	1.02707e-19		ENSG00000152128	-1.29637	4.47622e-10
ENSG00000122042	-0.273615	3.99002e-11		ENSG00000133812	0.372008	3.87058e-06		ENSG00000132122	-0.568711	6.72801e-07		ENSG00000152208	-1.93856	9.02407e-28
ENSG00000122218	0.144505	0.000595065		ENSG00000133835	0.159765	0.015447		ENSG00000132170	0.223636	0.0184381		ENSG00000152217	-0.682177	2.94951e-14
ENSG00000122406	-0.144565	0.000109679		ENSG00000133943	0.185408	0.00394557		ENSG00000132199	0.155215	0.0107966		ENSG00000152315	-0.692064	3.66152e-09
ENSG00000122482	0.119625	0.0218811		ENSG00000133961	-0.200492	0.0282913		ENSG00000132256	-0.20252	5.30643e-09		ENSG00000152457	-0.186037	0.00175533
ENSG00000122483	0.117397	0.00123045		ENSG00000134108	0.158418	0.0250625		ENSG00000132274	-0.250639	0.000286644		ENSG00000152492	-0.208194	0.0194247
ENSG00000122566	0.130985	0.00504736		ENSG00000134146	0.192082	0.0391099		ENSG00000132294	0.472625	1.27758e-10		ENSG00000152818	0.471493	3.85782e-05
ENSG00000122705	0.100403	0.00328369		ENSG00000134243	-0.353535	2.86403e-07		ENSG00000132334	-0.649858	8.0751e-08		ENSG00000153046	-0.378989	0.000127915
ENSG00000122707	-0.222486	1.36325e-10		ENSG00000134245	-0.222146	6.20306e-06		ENSG00000132341	-0.108706	0.00800095		ENSG00000153071	0.359025	7.10711e-05
ENSG00000122862	0.73771	3.50926e-17		ENSG00000134250	0.286287	2.95309e-05		ENSG00000132359	-0.15347	0.0324895		ENSG00000153208	0.623135	9.12049e-06
ENSG00000122884	0.169897	0.0249126		ENSG00000134278	0.36737	8.96848e-08		ENSG00000132530	0.265708	0.00827844		ENSG00000153250	0.821425	1.12497e-06
ENSG00000122958	0.171757	2.62802e-07		ENSG00000134294	-0.210921	0.000346049		ENSG00000132549	0.296215	0.000893297		ENSG00000153317	0.455502	0.000574604
ENSG00000123094	-1.57195	1.35134e-256		ENSG00000134318	0.213867	0.00217347		ENSG00000132589	-0.155257	0.0107135		ENSG00000153814	-0.984264	5.06598e-15
ENSG00000123095	-1.0238	1.04401e-147		ENSG00000134352	-0.698974	2.31069e-19		ENSG00000132718	-0.122539	0.00309616		ENSG00000153823	0.744824	2.54801e-08
ENSG00000123104	-0.736448	1.48463e-36		ENSG00000134508	0.194675	0.00479106		ENSG00000132952	0.15948	0.0205075		ENSG00000154027	-0.13272	0.0280818
ENSG00000123106	0.38333	2.58855e-12		ENSG00000134574	-0.174678	0.000317964		ENSG00000132965	-0.278997	4.48398e-11		ENSG00000154122	0.442197	0.000367018
ENSG00000123124	0.718208	3.71112e-46		ENSG00000134686	-0.441664	2.04805e-07		ENSG00000133030	-0.219696	4.20387e-05		ENSG00000154229	-0.985507	1.75712e-11
ENSG00000123213	0.184917	7.47311e-07		ENSG00000134759	-0.130122	0.00567896		ENSG00000133106	0.408075	0.000655093		ENSG00000154237	-0.553676	8.57306e-07
ENSG00000123338	-0.166183	0.000335998		ENSG00000134909	-0.249385	0.000465323		ENSG00000133119	-0.11031	0.0311523		ENSG00000154310	-0.19885	0.00408983
ENSG00000123352	0.118294	0.000621265		ENSG00000134987	0.326206	1.76909e-08		ENSG00000133121	2.07511	1.37074e-71		ENSG00000154330	-0.262976	0.0073198
ENSG00000123384	0.238785	9.79105e-07		ENSG00000134996	0.176836	0.0108707		ENSG00000133216	-0.17286	0.00138457		ENSG00000154511	-0.204356	0.000506381
ENSG00000123416	-0.250588	2.47914e-05		ENSG00000135048	0.774517	1.60938e-14		ENSG00000133246	-0.505102	4.62805e-29		ENSG00000154639	-0.214404	0.00296016
ENSG00000123560	-0.106201	0.0360046		ENSG00000135077	-0.401815	6.62637e-11		ENSG00000133275	-0.124838	0.000183001		ENSG00000154917	-0.172866	0.0324537
ENSG00000123643	0.271021	1.34412e-15		ENSG00000135164	-0.144894	0.0443549		ENSG00000133313	-0.112479	0.0472428		ENSG00000154978	-0.322572	0.00976194
ENSG00000123983	0.196852	4.3589e-06		ENSG00000135205	-0.205013	0.000540871		ENSG00000133318	0.198384	0.0241682		ENSG00000155085	-0.148384	0.00199453
ENSG00000124126	-0.372162	3.25378e-09		ENSG00000135298	-0.301626	0.00501457		ENSG00000133574	-0.139535	0.000580172		ENSG00000155097	0.314721	0.000632548
ENSG00000124151	0.378622	2.57232e-13		ENSG00000135363	-0.388905	1.72469e-19		ENSG00000133800	1.41657	1.96482e-54		ENSG00000155629	-0.605881	7.2387e-08
ENSG00000124160	-0.117368	8.89855e-06		ENSG00000135525	0.130497	0.0155934		ENSG00000133805	-0.305302	1.85196e-08		ENSG00000155792	-0.266852	0.0278892
ENSG00000124172	-0.182384	2.70102e-08		ENSG00000135535	0.174617	0.00213397		ENSG00000133812	0.385837	0.000247003		ENSG00000155903	0.7574	5.73122e-10
ENSG00000124198	0.124751	0.00266718		ENSG00000135540	0.294467	0.0128362		ENSG00000133835	0.242342	0.00329748		ENSG00000155962	0.221188	0.0138052
ENSG00000124225	-0.17659	1.03232e-17		ENSG00000135596	-0.153681	5.92878e-06		ENSG00000133943	0.275683	0.000112396		ENSG00000155970	-0.319155	0.00019238
ENSG00000124486	0.321083	4.38782e-13		ENSG00000135605	0.354164	6.22557e-12		ENSG00000134146	0.244457	0.0105571		ENSG00000156011	0.81153	2.28571e-07
ENSG00000124491	3.38722	1.47567e-249		ENSG00000135643	-0.145083	0.000450515		ENSG00000134243	-0.28816	0.000119482		ENSG00000156110	-0.433084	0.00109722
ENSG00000124496	-0.269831	2.26021e-15		ENSG00000135678	0.640393	6.86642e-10		ENSG00000134250	0.392592	7.30129e-09		ENSG00000156170	-0.155043	0.0371288
ENSG00000124762	-0.183769	1.24252e-12		ENSG00000135679	-0.248542	8.27355e-06		ENSG00000134278	0.48823	5.05125e-09		ENSG00000156261	-0.133449	0.00424174
ENSG00000124782	0.149034	0.0187255		ENSG00000135749	-1.20428	3.35514e-68		ENSG00000134294	-0.158468	0.0230925		ENSG00000156273	-0.386787	0.033673
ENSG00000124788	0.144076	0.0314248		ENSG00000135766	-0.246634	8.58886e-06		ENSG00000134352	-0.679126	4.06134e-16		ENSG00000156299	-0.741133	1.43948e-15
ENSG00000124813	-0.977546	4.33598e-93		ENSG00000135775	-0.110763	0.000917709		ENSG00000134480	-0.238311	0.0371934		ENSG00000156467	-0.208801	0.0318874
ENSG00000124831	0.184061	0.000564097		ENSG00000135823	-0.154914	0.00305046		ENSG00000134508	0.227416	0.0101722		ENSG00000156515	-0.256366	0.00636443
ENSG00000125089	-0.21474	4.02431e-07		ENSG00000135837	-0.185914	0.0187489		ENSG00000134574	-0.17201	0.000204703		ENSG00000156928	-0.110825	0.0274715
ENSG00000125249	-0.16644	1.51926e-07		ENSG00000135842	-0.490192	4.65499e-11		ENSG00000134686	-0.420156	1.75195e-06		ENSG00000157077	-0.177163	8.96811e-05
ENSG00000125257	-1.39046	1.26738e-175		ENSG00000135899	-0.2244	0.00131169		ENSG00000134900	0.197251	0.0139101		ENSG00000157107	1.00072	2.12588e-20
ENSG00000125354	-0.103098	0.00478816		ENSG00000135905	-0.847187	3.75089e-18		ENSG00000134909	-0.181428	0.0453411		ENSG00000157259	-0.174819	0.00703541
ENSG00000125454	-0.155936	6.52457e-20		ENSG00000135912	-0.104123	0.00630637		ENSG00000134982	0.203339	0.00832877		ENSG00000157303	-0.213326	9.2631e-09
ENSG00000125458	-0.104671	4.05179e-13		ENSG00000135951	-0.126112	0.000169215		ENSG00000134987	0.305025	1.20381e-06		ENSG00000157388	-0.664254	1.56786e-11
ENSG00000125629	-0.105559	3.51292e-05		ENSG00000136040	0.113883	0.0438152		ENSG00000134996	0.201256	0.00809785		ENSG00000157557	-0.32071	0.00379033
ENSG00000125633	0.128169	0.000790916		ENSG00000136044	-0.410766	5.25683e-08		ENSG00000135048	0.847483	1.43181e-12		ENSG00000157657	-0.205125	0.0114654
ENSG00000125691	-0.13338	0.00071959		ENSG00000136048	0.632781	2.3069e-24		ENSG00000135077	-0.314874	2.56259e-05		ENSG00000157680	-0.108861	0.0313756
ENSG00000125730	-1.53246	8.24683e-231		ENSG00000136104	0.157912	0.0214226		ENSG00000135205	-0.213093	0.00036069		ENSG00000157837	0.323539	0.00872766
ENSG00000125772	-0.363596	9.10399e-22		ENSG00000136141	-0.317676	0.000470439		ENSG00000135250	0.21286	0.0379191		ENSG00000157933	-0.433363	6.2754e-06
ENSG00000125810	0.111372	0.00121255		ENSG00000136144	-0.119314	0.00167239		ENSG00000135298	-0.283419	0.0127963		ENSG00000157985	0.265283	0.0222902
ENSG00000125952	-0.105088	0.00674901		ENSG00000136153	-0.187316	3.42725e-05		ENSG00000135299	0.204289	0.0121806		ENSG00000158321	-0.42561	0.0124303
ENSG00000126217	-1.03001	5.54641e-197		ENSG00000136156	-0.360553	1.22137e-05		ENSG00000135363	-0.435402	5.93692e-22		ENSG00000158560	-0.149256	9.88779e-05
ENSG00000126777	-0.105425	0.0279139		ENSG00000136193	-0.114121	0.0277897		ENSG00000135404	-0.137749	0.00448832		ENSG00000158813	0.97069	1.18534e-13
ENSG00000126804	0.148726	0.00116644		ENSG00000136238	-0.51281	1.76951e-22		ENSG00000135540	0.643735	8.77736e-07		ENSG00000158987	-0.335877	0.0274833
ENSG00000126821	0.128089	0.00215228		ENSG00000136295	0.333738	1.33323e-10		ENSG00000135605	0.409675	2.12122e-11		ENSG00000159023	-0.511891	1.85034e-09
ENSG00000127124	-1.07817	4.56059e-84		ENSG00000136404	-0.371185	2.5227e-08		ENSG00000135643	-0.153518	0.000161934		ENSG00000159216	-0.61068	0.0016199
ENSG00000127507	-0.118223	0.0168852		ENSG00000136436	0.222816	1.70611e-06		ENSG00000135678	0.844908	1.69667e-12		ENSG00000159314	-0.194039	0.00970858
ENSG00000127603	0.125181	0.0454893		ENSG00000136603	-0.415894	1.37812e-11		ENSG00000135679	-0.194738	0.00880821		ENSG00000159692	-0.132913	0.0109919
ENSG00000127663	-0.168669	3.07199e-05		ENSG00000136643	0.274745	0.000429407		ENSG00000135698	0.208561	0.00133298		ENSG00000159788	-0.377833	6.45606e-05
ENSG00000127914	0.149193	0.000427418		ENSG00000136717	-0.89613	7.19759e-41		ENSG00000135749	-1.10507	1.11952e-62		ENSG00000159842	-0.546009	1.69958e-05
ENSG00000127946	0.361525	2.72231e-22		ENSG00000136720	-0.134357	0.00479056		ENSG00000135766	-0.167004	0.00634546		ENSG00000160007	-0.207677	0.0494414
ENSG00000127947	0.348606	2.79253e-12		ENSG00000136732	0.265134	5.75088e-06		ENSG00000135829	-0.170886	0.00260786		ENSG00000160087	-0.122469	0.00822763
ENSG00000127951	0.160161	1.84654e-05		ENSG00000136754	-0.33171	1.96289e-05		ENSG00000135842	-0.585764	4.22646e-17		ENSG00000160191	-0.211098	7.81424e-06
ENSG00000127989	-0.110647	0.000691579		ENSG00000136854	-0.147687	0.00319044		ENSG00000135905	-1.03297	1.22256e-26		ENSG00000160213	-0.123148	0.0144244
ENSG00000128245	-0.278619	1.39048e-10		ENSG00000136895	-0.289673	3.55271e-07		ENSG00000135912	-0.103537	0.00381257		ENSG00000160294	-0.225018	0.00142635
ENSG00000128294	0.198557	1.10903e-11		ENSG00000137145	0.388688	2.72598e-07		ENSG00000135940	-0.110335	0.0355366		ENSG00000160948	-0.138219	0.033238
ENSG00000128487	-0.501269	2.02517e-22		ENSG00000137161	-0.168228	0.000337048		ENSG00000135999	0.203179	0.0170844		ENSG00000160953	-0.157703	0.0210614
ENSG00000128512	-0.758744	1.693e-30		ENSG00000137177	0.163292	0.0364381		ENSG00000136021	0.1967	0.00495053		ENSG00000161048	-0.187346	0.000205712
ENSG00000128573	-1.62883	1.7061e-210		ENSG00000137193	-0.145998	0.00549579		ENSG00000136044	-0.283221	0.00247701		ENSG00000161791	-0.639625	6.82324e-09
ENSG00000128595	0.188503	1.69792e-10		ENSG00000137312	-0.140634	0.0212577		ENSG00000136048	0.688485	2.61581e-26		ENSG00000162244	-0.220478	0.0134783
ENSG00000128699	0.146446	5.29872e-06		ENSG00000137393	0.641415	1.20124e-10		ENSG00000136051	0.23554	0.00325376		ENSG00000162302	-0.128665	0.0111899
ENSG00000128805	-0.7379	3.86334e-36		ENSG00000137409	-0.1322	0.0250862		ENSG00000136141	-0.399408	3.25354e-05		ENSG00000162367	-0.285143	1.66557e-07
ENSG00000128815	-0.464493	4.3367e-24		ENSG00000137462	0.275941	0.0303155		ENSG00000136144	-0.110567	0.0201142		ENSG00000162511	-0.50711	1.62662e-06
ENSG00000128872	-0.176821	2.44531e-08		ENSG00000137474	0.102889	0.0370753		ENSG00000136153	-0.246007	5.5842e-06		ENSG00000162599	0.381344	0.0040778
ENSG00000128923	-0.182558	3.17756e-13		ENSG00000137478	0.994235	7.27756e-26		ENSG00000136156	-0.349475	2.95898e-05		ENSG00000162711	-0.117535	0.0449392
ENSG00000128928	-0.210797	6.37065e-22		ENSG00000137575	0.414321	5.49564e-08		ENSG00000136193	-0.119831	0.00731288		ENSG00000162734	-0.186488	0.0049062
ENSG00000129084	-0.26323	1.91443e-08		ENSG00000137642	-1.85294	8.19961e-66		ENSG00000136238	-0.403505	2.29071e-11		ENSG00000162819	-0.157612	0.0180353
ENSG00000129116	0.110811	1.58695e-06		ENSG00000137831	0.230266	5.91422e-05		ENSG00000136250	-0.332304	0.0139623		ENSG00000162869	0.307384	0.00463465
ENSG00000129422	-0.337536	9.8134e-17		ENSG00000137841	-0.293477	2.02472e-08		ENSG00000136295	0.475283	1.07712e-17		ENSG00000162959	-0.112115	0.0244326
ENSG00000129493	0.142147	0.000608882		ENSG00000137845	-0.296221	6.09231e-05		ENSG00000136371	-0.132914	0.000433352		ENSG00000162980	-0.36162	4.88033e-05
ENSG00000129515	0.855474	1.11595e-81		ENSG00000137872	-0.153662	1.09026e-06		ENSG00000136404	-0.24917	0.000200733		ENSG00000163110	0.324185	0.000204405
ENSG00000129534	-0.131782	0.00741643		ENSG00000137942	-0.237293	0.00060281		ENSG00000136436	0.206364	6.49414e-05		ENSG00000163162	0.535862	0.00415323
ENSG00000129667	-0.394526	4.88091e-14		ENSG00000137959	0.531231	5.34747e-06		ENSG00000136448	-0.124564	0.0383826		ENSG00000163219	-0.611871	4.91921e-08
ENSG00000129675	-0.301923	3.67348e-16		ENSG00000137965	0.421594	1.24748e-09		ENSG00000136560	0.200734	0.0159203		ENSG00000163291	-0.239698	4.33988e-08
ENSG00000130066	0.347287	6.45572e-07		ENSG00000138069	0.240932	0.00202779		ENSG00000136603	-0.394281	1.22032e-10		ENSG00000163406	-0.292207	0.00636786
ENSG00000130203	-0.421103	3.62304e-11		ENSG00000138101	-0.28354	0.00169979		ENSG00000136643	0.275442	0.00327841		ENSG00000163512	0.268586	0.00753166
ENSG00000130208	-0.330981	1.03429e-37		ENSG00000138119	-0.483229	3.05099e-15		ENSG00000136717	-0.974858	1.60409e-36		ENSG00000163513	-0.501698	7.81424e-06
ENSG00000130340	0.551691	3.55958e-25		ENSG00000138134	-0.479331	1.4128e-21		ENSG00000136732	0.217152	0.00206174		ENSG00000163527	0.210568	0.0293224
ENSG00000130396	-0.190394	2.11906e-13		ENSG00000138185	-0.74172	1.07384e-18		ENSG00000136754	-0.208571	0.0241346		ENSG00000163563	-0.162429	0.0175809
ENSG00000130429	-0.107787	0.00346954		ENSG00000138190	-0.284038	9.97827e-06		ENSG00000136813	0.17706	0.0149591		ENSG00000163694	0.715357	1.48806e-08
ENSG00000130475	-0.204454	8.45385e-21		ENSG00000138448	-0.566549	6.63744e-18		ENSG00000136869	0.183454	0.0107966		ENSG00000163755	-0.282963	0.000567878
ENSG00000130479	-0.1024	2.93034e-08		ENSG00000138449	0.196484	0.000453436		ENSG00000137145	0.56476	4.92118e-12		ENSG00000163840	-0.113314	0.00942769
ENSG00000130559	-0.115867	5.51662e-06		ENSG00000138463	0.183723	0.0324251		ENSG00000137154	-0.209175	0.00483561		ENSG00000163932	-0.305719	3.49524e-07
ENSG00000130775	0.166655	5.37356e-06		ENSG00000138621	0.150035	0.00384562		ENSG00000137161	-0.187098	2.88186e-05		ENSG00000163935	-0.164782	0.0309864
ENSG00000130830	0.177702	1.92774e-10		ENSG00000138639	-0.403162	0.000118305		ENSG00000137177	0.31017	9.55621e-06		ENSG00000164010	-0.120454	0.0112486
ENSG00000130844	0.213218	4.42864e-06		ENSG00000138640	0.273474	0.0122817		ENSG00000137193	-0.141596	0.0229752		ENSG00000164096	-0.160781	0.00157074
ENSG00000130939	0.162472	7.94852e-05		ENSG00000138670	0.351735	0.00204892		ENSG00000137393	0.631611	1.1776e-06		ENSG00000164164	-0.13935	0.0324537
ENSG00000131051	0.106466	0.0195398		ENSG00000138735	-0.112124	0.000316702		ENSG00000137462	0.37813	0.00302534		ENSG00000164168	-0.110204	0.000371272
ENSG00000131067	-0.125666	1.38026e-09		ENSG00000138756	-0.39629	1.21753e-05		ENSG00000137474	0.164647	0.00469993		ENSG00000164292	0.451204	1.84656e-06
ENSG00000131143	-0.103764	0.000483127		ENSG00000138757	-0.10147	0.04907		ENSG00000137478	1.06051	7.07654e-28		ENSG00000164300	0.658612	2.0725e-12
ENSG00000131238	-0.16909	4.20037e-11		ENSG00000138758	0.36821	1.0383e-08		ENSG00000137575	0.505089	1.87244e-08		ENSG00000164466	-0.122855	0.0210442
ENSG00000131323	-0.114065	0.0227613		ENSG00000138760	0.223948	0.000687441		ENSG00000137642	-1.86777	1.73594e-82		ENSG00000164535	-0.259855	0.000554376
ENSG00000131374	0.34027	6.79387e-08		ENSG00000138814	0.198093	0.0306056		ENSG00000137818	-0.413315	3.61808e-05		ENSG00000164543	-0.232934	0.00017034
ENSG00000131375	0.153322	1.47479e-05		ENSG00000138942	0.138808	0.00406722		ENSG00000137831	0.299156	4.07038e-07		ENSG00000164574	-0.558472	9.10421e-09
ENSG00000131446	0.532458	1.22356e-30		ENSG00000139083	-0.250139	0.0313785		ENSG00000137841	-0.34111	9.69717e-19		ENSG00000164587	-0.290662	0.00644488
ENSG00000131503	0.194957	0.00202278		ENSG00000139117	0.874811	2.28468e-36		ENSG00000137845	-0.291705	0.000789178		ENSG00000164654	-0.272685	1.58395e-05
ENSG00000131711	-0.232325	0.000100029		ENSG00000139146	-0.174257	0.000107137		ENSG00000137872	-0.129174	6.92227e-05		ENSG00000164808	0.579768	2.15708e-05
ENSG00000131724	-0.278241	3.26908e-10		ENSG00000139437	-0.146962	0.000119032		ENSG00000137942	-0.234132	0.00219824		ENSG00000164830	-1.34843	2.16078e-22
ENSG00000131725	0.129426	0.000348807		ENSG00000139496	0.128987	0.0399107		ENSG00000137944	-0.12835	0.00552741		ENSG00000165025	-0.393714	0.00763366
ENSG00000131773	-0.977329	9.51542e-86		ENSG00000139505	0.131767	0.0091687		ENSG00000137959	0.499603	0.000126892		ENSG00000165029	0.750367	1.14478e-07
ENSG00000132122	-0.602307	2.41553e-24		ENSG00000139613	-0.137108	0.00102544		ENSG00000137965	0.376364	1.69414e-06		ENSG00000165097	-0.217745	0.000964923
ENSG00000132170	0.162345	0.00245915		ENSG00000139644	-0.151607	0.0257022		ENSG00000138069	0.213266	0.0343837		ENSG00000165138	-0.103958	0.0267645
ENSG00000132199	0.168162	4.09248e-08		ENSG00000139726	-0.108053	0.0252173		ENSG00000138101	-0.319574	0.000678375		ENSG00000165181	-0.265555	0.0116546
ENSG00000132256	-0.127473	1.44056e-09		ENSG00000139832	0.520125	1.88768e-13		ENSG00000138119	-0.384854	2.32438e-09		ENSG00000165209	-0.429113	3.10434e-09
ENSG00000132274	-0.266284	8.76751e-14		ENSG00000139946	0.267576	0.00501457		ENSG00000138134	-0.424285	1.07903e-14		ENSG00000165322	-0.547422	4.65567e-10
ENSG00000132294	0.560191	3.15426e-35		ENSG00000139970	0.503426	3.77481e-09		ENSG00000138138	-0.120042	0.0143736		ENSG00000165338	-0.224959	0.0434245
ENSG00000132334	-0.459489	4.59614e-12		ENSG00000139971	-0.393724	9.44245e-18		ENSG00000138185	-0.635923	3.51846e-11		ENSG00000165475	0.206453	0.0465135
ENSG00000132359	-0.267727	7.46152e-15		ENSG00000139974	0.956713	2.87325e-37		ENSG00000138326	-0.282996	0.00306421		ENSG00000165672	-0.102181	0.00555517
ENSG00000132405	0.387817	1.39922e-07		ENSG00000140022	0.399362	2.04744e-11		ENSG00000138442	-0.109611	0.00589574		ENSG00000165732	-0.193028	0.0245816
ENSG00000132466	0.127762	0.0327548		ENSG00000140199	-0.178298	0.00297401		ENSG00000138448	-0.356384	2.04689e-06		ENSG00000165795	-0.205233	0.0230931
ENSG00000132485	0.10088	0.0092985		ENSG00000140264	-0.184184	0.0017576		ENSG00000138593	0.153924	0.0116592		ENSG00000165801	-0.141315	0.0435522
ENSG00000132530	0.219155	1.74212e-06		ENSG00000140332	-0.178876	0.000949164		ENSG00000138621	0.185743	0.00336579		ENSG00000166002	-0.192165	1.11364e-05
ENSG00000132549	0.126457	0.0349056		ENSG00000140350	-0.165765	0.0181256		ENSG00000138639	-0.300342	0.0262939		ENSG00000166033	-0.62603	1.12789e-22
ENSG00000132589	-0.135438	4.8874e-06		ENSG00000140386	0.16531	0.038452		ENSG00000138640	0.380301	0.000111328		ENSG00000166128	0.284647	0.00881901
ENSG00000132718	-0.120937	3.85289e-07		ENSG00000140548	-0.36932	1.06516e-05		ENSG00000138670	0.403044	2.02019e-07		ENSG00000166326	-0.253076	0.0407801
ENSG00000132952	0.137975	0.000206137		ENSG00000140575	0.954287	8.42597e-41		ENSG00000138735	-0.180535	1.83355e-08		ENSG00000166532	0.233791	0.00224609
ENSG00000132965	-0.246787	6.3857e-16		ENSG00000140577	0.377015	9.70873e-16		ENSG00000138756	-0.357312	0.00267014		ENSG00000166669	-0.391438	1.40313e-05
ENSG00000133030	-0.227034	9.35887e-12		ENSG00000140678	-0.578202	1.65754e-21		ENSG00000138758	0.472389	3.7191e-09		ENSG00000166887	-0.143878	0.0186587
ENSG00000133056	-0.10743	1.20709e-08		ENSG00000140743	0.174402	0.00857217		ENSG00000138760	0.214646	0.00329938		ENSG00000166927	0.423733	0.00653975
ENSG00000133104	0.152771	1.85648e-06		ENSG00000140750	-0.168826	0.0469329		ENSG00000138814	0.206829	0.0384595		ENSG00000166949	-0.308917	0.000952117
ENSG00000133106	0.346414	1.57927e-09		ENSG00000140853	-0.183055	0.00179273		ENSG00000138942	0.165233	0.000285662		ENSG00000167291	-0.273433	0.0160509
ENSG00000133121	2.02154	5.22806e-147		ENSG00000140948	0.11324	0.0442812		ENSG00000139083	-0.305575	0.0479924		ENSG00000167566	-0.166923	0.00321298
ENSG00000133216	-0.163662	2.38664e-09		ENSG00000140968	-0.518568	8.47096e-22		ENSG00000139117	1.00729	2.90035e-36		ENSG00000167658	-0.188167	0.0293208
ENSG00000133246	-0.491896	6.42659e-64		ENSG00000141068	-0.169348	0.000697215		ENSG00000139146	-0.107848	0.0240088		ENSG00000167693	-0.294351	1.6359e-07
ENSG00000133574	-0.102268	9.02903e-07		ENSG00000141252	0.220142	0.00217915		ENSG00000139173	0.229656	0.047027		ENSG00000167851	-0.221307	0.000500834
ENSG00000133612	0.122365	0.000111321		ENSG00000141298	-0.496635	2.12699e-06		ENSG00000139323	-0.165392	0.0109083		ENSG00000168016	-0.213191	0.0275258
ENSG00000133704	0.107651	0.000934275		ENSG00000141367	0.198472	0.0290317		ENSG00000139370	-0.147253	0.000105883		ENSG00000168214	0.989041	4.64377e-08
ENSG00000133800	1.49788	9.2577e-139		ENSG00000141441	-0.660879	5.34422e-22		ENSG00000139644	-0.18546	0.00358279		ENSG00000168216	-0.235952	0.0159796
ENSG00000133805	-0.236072	3.78902e-14		ENSG00000141447	0.196588	0.0220325		ENSG00000139668	0.221556	0.0403306		ENSG00000168234	-0.140646	0.00770949
ENSG00000133812	0.417365	3.89548e-12		ENSG00000141458	-0.279634	4.56384e-07		ENSG00000139687	-0.222886	0.0410281		ENSG00000168283	-0.12743	0.00408877
ENSG00000133835	0.217985	6.76423e-08		ENSG00000141503	-0.118494	0.0200212		ENSG00000139726	-0.115696	0.0269046		ENSG00000168329	-0.876442	4.27273e-26
ENSG00000133858	0.102519	0.0311438		ENSG00000141526	-0.131905	0.00691761		ENSG00000139737	-0.11315	0.00254002		ENSG00000168395	-0.108957	0.0221245
ENSG00000133943	0.200592	1.06664e-06		ENSG00000141655	0.159031	0.0060685		ENSG00000139793	0.210976	0.0399442		ENSG00000168724	-0.111961	0.0176811
ENSG00000133961	-0.11532	0.0420534		ENSG00000141664	0.361728	6.72297e-07		ENSG00000139832	0.517893	2.76556e-08		ENSG00000168918	-0.713769	1.09644e-08
ENSG00000134046	0.153305	0.00024945		ENSG00000141837	-0.745508	2.67934e-32		ENSG00000139970	0.517588	4.25604e-10		ENSG00000168958	-0.190219	0.035636
ENSG00000134108	0.239822	4.66451e-09		ENSG00000142002	-0.108373	0.0241818		ENSG00000139971	-0.330745	4.36075e-11		ENSG00000168994	0.156189	0.0409602
ENSG00000134186	-0.11194	0.00208459		ENSG00000142089	0.15952	4.94549e-05		ENSG00000139974	0.921472	3.95891e-29		ENSG00000169313	-1.14892	2.65795e-24
ENSG00000134243	-0.324971	4.61918e-14		ENSG00000142192	0.261849	0.00278322		ENSG00000140022	0.36158	4.59167e-06		ENSG00000169372	-0.290204	0.0112935
ENSG00000134245	-0.120947	0.00117688		ENSG00000142303	-0.161546	2.66112e-05		ENSG00000140264	-0.244373	9.53591e-06		ENSG00000169403	-0.226543	0.000597192
ENSG00000134250	0.420944	2.12957e-21		ENSG00000142347	-0.386508	1.91708e-05		ENSG00000140386	0.292686	0.00116128		ENSG00000169508	0.419933	3.05388e-05
ENSG00000134255	0.194057	2.63352e-06		ENSG00000142512	-0.252007	8.89446e-09		ENSG00000140455	0.204922	0.0184657		ENSG00000169554	0.602915	5.77501e-05
ENSG00000134278	0.350669	2.68661e-15		ENSG00000142552	0.175113	5.8906e-05		ENSG00000140548	-0.238791	0.0184657		ENSG00000169567	-0.156125	0.0183106
ENSG00000134318	0.147977	0.0014058		ENSG00000142583	-0.730121	3.04414e-19		ENSG00000140575	0.942164	8.37796e-30		ENSG00000169756	-0.436486	0.000188066
ENSG00000134352	-0.681473	1.87197e-43		ENSG00000142599	0.216179	0.0157693		ENSG00000140577	0.289404	1.23965e-06		ENSG00000169855	-0.142197	0.0358323
ENSG00000134369	0.144191	0.000135419		ENSG00000142634	-0.123233	0.00188999		ENSG00000140678	-0.506007	4.10212e-18		ENSG00000169896	-0.334677	0.000221399
ENSG00000134508	0.26498	3.54319e-10		ENSG00000143079	-0.295512	3.25797e-05		ENSG00000140743	0.210274	0.00557447		ENSG00000169902	0.378142	9.2442e-05
ENSG00000134574	-0.191134	1.18058e-13		ENSG00000143110	0.134886	0.020199		ENSG00000140749	-0.113825	0.0259425		ENSG00000170017	-0.376733	0.00247119
ENSG00000134686	-0.367138	3.53573e-12		ENSG00000143119	-0.246221	0.000970329		ENSG00000140750	-0.217519	0.0047987		ENSG00000170266	-0.177679	0.0339914
ENSG00000134769	-0.23648	8.82345e-05		ENSG00000143153	0.300936	2.3594e-05		ENSG00000140853	-0.200933	0.000601059		ENSG00000170345	0.447834	0.0004277
ENSG00000134815	0.130218	4.75269e-06		ENSG00000143158	-0.102565	0.00725372		ENSG00000140948	0.126527	0.0396978		ENSG00000170396	0.480969	0.000144885
ENSG00000134851	0.152007	0.00138278		ENSG00000143164	-0.474639	3.04137e-10		ENSG00000140968	-0.53367	7.81973e-20		ENSG00000170522	-0.142041	0.01225
ENSG00000134882	0.202319	0.000131837		ENSG00000143179	-0.184077	1.33345e-06		ENSG00000140988	-0.188857	0.0408749		ENSG00000170525	-0.298666	0.0175409
ENSG00000134900	0.136525	0.00218162		ENSG00000143226	0.456245	1.24574e-07		ENSG00000141252	0.342092	1.49709e-05		ENSG00000170542	-0.659299	1.73443e-12
ENSG00000134987	0.456462	4.13029e-31		ENSG00000143344	1.66904	7.93353e-52		ENSG00000141279	0.159351	0.0486546		ENSG00000170571	0.35139	0.00231481
ENSG00000135047	0.114781	0.000325293		ENSG00000143420	-0.125557	0.0207802		ENSG00000141298	-0.536918	1.84287e-05		ENSG00000170638	-0.168276	0.00297693
ENSG00000135048	0.965044	3.0432e-44		ENSG00000143641	-0.476627	3.10892e-10		ENSG00000141367	0.285842	0.000449092		ENSG00000170677	-0.663301	4.58659e-09
ENSG00000135077	-0.261869	2.14437e-10		ENSG00000143776	0.230423	5.8938e-05		ENSG00000141441	-0.657878	1.79031e-19		ENSG00000170759	-0.23261	0.00822763
ENSG00000135090	0.272648	5.47641e-06		ENSG00000143889	0.153398	0.00359786		ENSG00000141458	-0.306634	2.12422e-08		ENSG00000170791	-0.129655	0.0316329
ENSG00000135205	-0.19227	7.93307e-09		ENSG00000143891	0.247794	1.72032e-05		ENSG00000141503	-0.106196	0.0421225		ENSG00000170873	0.717444	5.99824e-07
ENSG00000135250	0.217638	7.82997e-06		ENSG00000143919	-0.207902	0.0337729		ENSG00000141526	-0.196291	2.35789e-06		ENSG00000170921	-0.286261	0.0445258
ENSG00000135298	-0.261301	3.21076e-06		ENSG00000143924	-0.688152	9.25231e-21		ENSG00000141655	0.158313	0.0190242		ENSG00000171189	-0.193251	0.00117216
ENSG00000135363	-0.374482	5.25015e-42		ENSG00000143951	0.217488	0.00803393		ENSG00000141664	0.433712	1.31388e-07		ENSG00000171310	-0.888656	2.73257e-12
ENSG00000135535	0.190891	8.98897e-07		ENSG00000144218	0.823512	2.00613e-14		ENSG00000141837	-0.653923	1.49538e-19		ENSG00000171316	-0.569766	3.49524e-07
ENSG00000135540	0.408014	6.86629e-08		ENSG00000144228	-0.207284	0.000404354		ENSG00000142192	0.439141	6.18866e-06		ENSG00000171488	-0.325403	0.0039435
ENSG00000135596	-0.190415	1.71213e-25		ENSG00000144451	-0.115486	0.00343078		ENSG00000142303	-0.133903	0.000382989		ENSG00000171552	-0.230459	0.0113632
ENSG00000135605	0.418572	4.42383e-31		ENSG00000144455	0.396287	2.04752e-05		ENSG00000142347	-0.254314	0.00336687		ENSG00000171587	-0.946303	6.26116e-18
ENSG00000135643	-0.126051	2.40217e-07		ENSG00000144677	0.320942	1.1198e-09		ENSG00000142512	-0.319469	4.09288e-14		ENSG00000171608	-0.250619	0.00814541
ENSG00000135678	0.862883	1.63018e-32		ENSG00000144711	0.455423	2.27169e-16		ENSG00000142534	-0.286573	0.0014634		ENSG00000171617	-0.239521	0.00778083
ENSG00000135679	-0.211848	9.1898e-10		ENSG00000144744	-0.125904	0.0256413		ENSG00000142552	0.180601	0.000106311		ENSG00000171643	-0.473328	5.1783e-08
ENSG00000135698	0.167173	9.2412e-08		ENSG00000144746	-0.218662	2.74396e-06		ENSG00000142583	-0.946593	1.97949e-31		ENSG00000171659	-0.380579	8.31583e-08
ENSG00000135749	-1.04202	7.46973e-124		ENSG00000144791	0.457805	4.48359e-11		ENSG00000142599	0.244924	0.0164537		ENSG00000171700	-0.146749	0.0108673
ENSG00000135766	-0.226636	4.72209e-11		ENSG00000144893	-0.288857	2.36665e-08		ENSG00000142634	-0.121607	0.00472439		ENSG00000171720	-0.113519	0.0472971
ENSG00000135823	-0.103808	0.00769242		ENSG00000144909	-0.192142	0.000695057		ENSG00000142676	-0.286858	0.000214452		ENSG00000171766	-0.198842	0.000426735
ENSG00000135842	-0.695273	7.03018e-53		ENSG00000144935	-0.169658	1.87109e-06		ENSG00000142937	-0.215503	0.00488804		ENSG00000171791	-0.482579	0.00102138
ENSG00000135899	-0.220364	1.40181e-08		ENSG00000144959	0.141624	0.01804		ENSG00000143079	-0.267414	0.000896884		ENSG00000171793	-0.103564	0.00779169
ENSG00000135905	-0.989175	1.40425e-68		ENSG00000145012	0.267407	0.00587426		ENSG00000143119	-0.320288	6.83463e-05		ENSG00000171877	-0.11253	0.0473872
ENSG00000135999	0.121721	0.0192773		ENSG00000145088	0.24502	0.000106949		ENSG00000143158	-0.134146	0.000316085		ENSG00000171914	-1.1296	1.46621e-46
ENSG00000136021	0.123821	0.000707769		ENSG00000145332	-0.136018	0.0192574		ENSG00000143164	-0.480226	4.86731e-09		ENSG00000171943	-0.802531	1.14069e-16
ENSG00000136040	0.136528	0.000215478		ENSG00000145349	-0.636617	2.07094e-14		ENSG00000143179	-0.181365	5.10456e-07		ENSG00000172216	-0.299838	0.00270262
ENSG00000136044	-0.302268	9.2361e-12		ENSG00000145431	0.842871	1.58541e-16		ENSG00000143207	0.234457	0.0361177		ENSG00000172340	-0.250714	0.0318341
ENSG00000136048	0.769475	1.26165e-63		ENSG00000145569	-0.378763	2.87165e-10		ENSG00000143226	0.28302	0.00743643		ENSG00000172667	-0.704556	1.33367e-17
ENSG00000136141	-0.314527	3.15912e-09		ENSG00000145685	-1.48821	1.33671e-56		ENSG00000143344	1.56612	5.01028e-48		ENSG00000172728	-0.15292	0.0406141
ENSG00000136153	-0.232985	2.09371e-16		ENSG00000145703	1.67602	3.13105e-70		ENSG00000143353	0.152007	0.0435133		ENSG00000172869	0.378833	0.000294796
ENSG00000136156	-0.327941	1.47721e-10		ENSG00000145730	0.258719	2.93679e-05		ENSG00000143384	0.214233	0.00152447		ENSG00000172985	-0.836769	7.56466e-07
ENSG00000136169	0.125461	0.000405841		ENSG00000145779	0.423574	5.64175e-08		ENSG00000143398	-0.193224	0.0079956		ENSG00000173166	0.221402	0.0449175
ENSG00000136193	-0.142523	1.54386e-09		ENSG00000145819	-0.39612	0.000319075		ENSG00000143641	-0.434753	1.21857e-07		ENSG00000173221	-0.219504	0.000426735
ENSG00000136238	-0.263695	5.2861e-13		ENSG00000145990	0.156172	0.00398491		ENSG00000143776	0.337326	1.74463e-07		ENSG00000173272	-0.110378	0.00672643
ENSG00000136250	-0.252976	0.000228038		ENSG00000146090	-1.3738	1.42356e-93		ENSG00000143889	0.192351	0.00307763		ENSG00000173369	-0.407694	0.00289154
ENSG00000136295	0.405399	6.38079e-31		ENSG00000146143	-0.164481	0.0276232		ENSG00000143891	0.268848	3.13091e-05		ENSG00000173436	-0.325432	0.00139065
ENSG00000136371	-0.143604	7.30903e-10		ENSG00000146192	-0.206875	0.0234371		ENSG00000143924	-0.66938	1.01389e-17		ENSG00000173482	0.373628	0.000894011
ENSG00000136404	-0.250016	1.53561e-13		ENSG00000146223	-0.100649	0.00101705		ENSG00000143947	-0.184283	0.045491		ENSG00000173517	1.20088	2.10575e-27
ENSG00000136436	0.208534	1.96534e-10		ENSG00000146247	0.179371	0.0433866		ENSG00000143951	0.272821	0.00558604		ENSG00000173542	-0.225608	0.0332874
ENSG00000136560	0.201221	2.44629e-05		ENSG00000146350	-0.130727	0.00626855		ENSG00000144036	0.431493	5.36019e-06		ENSG00000173706	-0.223262	2.37917e-06
ENSG00000136603	-0.386901	8.89359e-24		ENSG00000146376	1.22034	1.05785e-45		ENSG00000144218	0.622462	5.28299e-06		ENSG00000173726	-0.184133	0.00970858
ENSG00000136643	0.240906	1.55563e-06		ENSG00000146409	0.273993	7.61086e-06		ENSG00000144455	0.460795	4.54226e-06		ENSG00000173744	1.296	9.1595e-16
ENSG00000136717	-0.9235	6.58344e-101		ENSG00000146416	-0.311926	4.31756e-05		ENSG00000144504	-0.179974	0.000807109		ENSG00000173875	-0.135358	0.0445258
ENSG00000136732	0.197188	2.33617e-08		ENSG00000146555	-1.35008	2.60076e-60		ENSG00000144642	0.160354	0.0482588		ENSG00000173950	-0.195406	3.85782e-05
ENSG00000136754	-0.22014	1.01249e-05		ENSG00000146731	-0.105067	0.00756996		ENSG00000144668	-0.222522	0.0311928		ENSG00000174125	-0.308828	0.00113036
ENSG00000136770	0.121235	0.00552671		ENSG00000146828	-0.167277	1.7105e-05		ENSG00000144677	0.408194	3.14984e-09		ENSG00000174456	-0.131179	0.0185127
ENSG00000136813	0.173669	0.000137723		ENSG00000147010	-0.624893	3.68629e-16		ENSG00000144711	0.455885	1.88361e-11		ENSG00000174473	0.587601	7.58432e-05
ENSG00000136869	0.225665	8.5369e-09		ENSG00000147065	-0.268107	0.000383152		ENSG00000144713	-0.226821	0.00937839		ENSG00000174748	-0.239031	0.0221461
ENSG00000136895	-0.248232	3.83823e-12		ENSG00000147202	-0.438358	8.71994e-09		ENSG00000144744	-0.212473	3.71821e-05		ENSG00000175348	-0.137469	0.000679828
ENSG00000137145	0.44224	4.74398e-19		ENSG00000147324	0.493077	1.64525e-15		ENSG00000144746	-0.177798	0.000145534		ENSG00000175471	1.19277	1.86658e-24
ENSG00000137154	-0.204473	1.13538e-07		ENSG00000147454	-0.784989	8.06401e-27		ENSG00000144791	0.443255	8.33776e-09		ENSG00000175711	0.169054	0.00830998
ENSG00000137161	-0.192913	1.7828e-15		ENSG00000147459	0.24158	0.0124763		ENSG00000144802	-0.129438	0.0191412		ENSG00000175893	-0.26566	0.0029641
ENSG00000137177	0.194296	5.62862e-06		ENSG00000147650	-0.123232	5.94409e-05		ENSG00000144893	-0.328701	2.22407e-10		ENSG00000175899	-0.69032	4.12497e-11
ENSG00000137393	0.746872	6.29013e-30		ENSG00000148154	-0.250616	0.00225098		ENSG00000144935	-0.141442	0.00116345		ENSG00000175931	-0.288203	0.000203297
ENSG00000137409	-0.102399	0.00280897		ENSG00000148180	-0.409732	1.90253e-08		ENSG00000145012	0.379795	6.40724e-05		ENSG00000176225	-0.608161	2.45925e-10
ENSG00000137449	0.115341	0.00247963		ENSG00000148219	0.352861	4.99671e-08		ENSG00000145088	0.275675	6.58011e-05		ENSG00000176390	-0.228674	0.00250762
ENSG00000137462	0.398102	1.3094e-08		ENSG00000148429	-0.646929	6.87268e-20		ENSG00000145246	-0.16109	0.0237083		ENSG00000176533	-0.38246	0.000466621
ENSG00000137474	0.114588	2.7392e-05		ENSG00000148516	-0.50697	9.20679e-11		ENSG00000145349	-0.669259	2.1921e-14		ENSG00000176597	-0.543417	1.97258e-08
ENSG00000137478	0.99859	3.49861e-55		ENSG00000148655	-0.213365	0.0471198		ENSG00000145414	-0.103338	0.00783976		ENSG00000176658	0.376392	2.36682e-05
ENSG00000137575	0.535961	3.54938e-27		ENSG00000148700	0.132691	0.00909839		ENSG00000145425	-0.156238	0.0291531		ENSG00000176974	0.214327	0.0168256
ENSG00000137642	-1.75436	2.57537e-209		ENSG00000148908	-0.474814	1.40976e-13		ENSG00000145431	0.990928	2.48855e-15		ENSG00000177189	-0.373845	0.0011223
ENSG00000137818	-0.173992	0.00253187		ENSG00000148948	-0.319819	2.17245e-05		ENSG00000145569	-0.276088	0.000183001		ENSG00000177200	-0.429935	1.66556e-05
ENSG00000137831	0.363481	7.508e-20		ENSG00000149177	-0.423259	0.000134667		ENSG00000145592	-0.225526	0.013107		ENSG00000177548	-0.113975	0.0155346
ENSG00000137841	-0.243538	3.0872e-21		ENSG00000149212	-0.279597	4.47806e-05		ENSG00000145604	0.175065	0.00247701		ENSG00000177570	-0.268068	0.0224275
ENSG00000137845	-0.295224	1.7408e-09		ENSG00000149256	-1.00533	7.93353e-52		ENSG00000145685	-1.31038	8.23254e-33		ENSG00000177575	2.065	9.50985e-41
ENSG00000137872	-0.120664	2.14251e-11		ENSG00000149269	-0.262888	3.30741e-05		ENSG00000145703	1.8247	6.0862e-68		ENSG00000177663	-0.406084	0.00449688
ENSG00000137942	-0.13037	0.00834091		ENSG00000149311	-0.213844	0.0130131		ENSG00000145725	0.1716	0.0268647		ENSG00000177675	0.625694	4.87359e-05
ENSG00000137959	0.45274	1.32699e-15		ENSG00000149571	-0.101009	0.028926		ENSG00000145730	0.282094	4.60162e-05		ENSG00000177889	-0.160045	0.0215679
ENSG00000137965	0.352452	3.01702e-21		ENSG00000150093	0.139107	0.0276758		ENSG00000145779	0.396326	4.32405e-06		ENSG00000178567	-0.134281	0.0270774
ENSG00000138069	0.230752	1.73228e-05		ENSG00000150337	-0.352455	1.23457e-11		ENSG00000145819	-0.433605	0.00142285		ENSG00000178573	0.375677	0.00779169
ENSG00000138078	-0.115241	0.00287744		ENSG00000150527	-0.294758	4.335e-08		ENSG00000145990	0.275216	0.000733301		ENSG00000178695	-0.344906	0.000690953
ENSG00000138101	-0.318205	2.22895e-09		ENSG00000150540	0.406201	1.31e-10		ENSG00000146090	-1.23546	5.58321e-69		ENSG00000178904	-0.221694	2.08711e-07
ENSG00000138119	-0.423972	1.27497e-26		ENSG00000150593	0.175708	0.00418496		ENSG00000146376	1.2165	2.16387e-32		ENSG00000178996	-0.253177	0.000338586
ENSG00000138134	-0.465579	7.17198e-40		ENSG00000150636	-0.180689	8.64153e-07		ENSG00000146409	0.297663	1.00888e-05		ENSG00000179104	0.249423	0.0224883
ENSG00000138185	-0.654992	1.72608e-37		ENSG00000150672	-0.306138	0.000616437		ENSG00000146416	-0.263714	0.000523902		ENSG00000179583	-0.254192	0.0411942
ENSG00000138190	-0.25439	2.21067e-09		ENSG00000150681	-0.110332	0.00626334		ENSG00000146555	-1.29627	1.05884e-51		ENSG00000180104	-0.134959	0.00292688
ENSG00000138303	0.142389	0.000303815		ENSG00000150782	-0.254711	0.000367886		ENSG00000146828	-0.21899	8.10881e-10		ENSG00000180233	-0.349945	0.000302267
ENSG00000138326	-0.165569	0.00067133		ENSG00000150938	0.216999	2.28803e-05		ENSG00000147010	-0.589796	4.99173e-14		ENSG00000180263	0.231151	0.000599289
ENSG00000138448	-0.476876	4.51007e-31		ENSG00000150991	-0.213542	0.0210406		ENSG00000147202	-0.400658	2.00263e-05		ENSG00000180354	-0.284093	0.000823248
ENSG00000138463	0.245162	7.59986e-08		ENSG00000150995	-0.490442	2.38988e-12		ENSG00000147324	0.463105	1.07206e-11		ENSG00000180357	-0.346721	0.0014439
ENSG00000138594	0.122433	0.00108376		ENSG00000151090	1.10242	1.22198e-36		ENSG00000147403	-0.194104	0.0271734		ENSG00000180817	-0.215166	0.00357127
ENSG00000138604	-0.133971	0.000214253		ENSG00000151229	0.189421	0.0272104		ENSG00000147454	-0.704	5.10494e-15		ENSG00000181163	-0.161613	0.00395496
ENSG00000138621	0.203061	1.78523e-09		ENSG00000151240	0.552377	2.84979e-14		ENSG00000147459	0.268393	0.0118297		ENSG00000181192	-0.178972	0.00292688
ENSG00000138639	-0.2939	5.69249e-05		ENSG00000151247	-0.132952	0.00479056		ENSG00000147604	-0.141293	0.0383516		ENSG00000181467	0.243734	0.0026236
ENSG00000138640	0.201686	0.00451981		ENSG00000151276	-0.30593	7.43296e-05		ENSG00000148154	-0.316681	0.000156808		ENSG00000181631	-0.143311	0.0275647
ENSG00000138670	0.525657	9.43594e-30		ENSG00000151322	0.375965	0.000265987		ENSG00000148180	-0.298581	0.000431124		ENSG00000181690	-0.172697	0.0338041
ENSG00000138735	-0.127564	5.51541e-13		ENSG00000151338	-0.181211	9.28479e-07		ENSG00000148219	0.343847	4.34974e-05		ENSG00000181804	0.37638	0.016148
ENSG00000138756	-0.484662	6.77944e-16		ENSG00000151474	-1.35514	1.49401e-41		ENSG00000148248	-0.120054	0.00167694		ENSG00000182054	-0.138342	0.00420669
ENSG00000138758	0.438508	3.27959e-22		ENSG00000151490	-0.211747	3.81323e-06		ENSG00000148429	-0.710513	2.31904e-24		ENSG00000182247	-0.477164	0.000758609
ENSG00000138760	0.287917	4.09243e-13		ENSG00000151491	0.362418	0.000339263		ENSG00000148484	0.19135	0.010974		ENSG00000182287	0.339226	2.08404e-05
ENSG00000138814	0.222609	1.01486e-05		ENSG00000151726	0.845091	9.98111e-09		ENSG00000148516	-0.451402	1.97984e-07		ENSG00000182389	-0.550834	1.95879e-07
ENSG00000138942	0.121071	1.39358e-06		ENSG00000151914	-0.488679	1.8884e-09		ENSG00000148700	0.142154	0.0262555		ENSG00000182578	-0.563297	8.19377e-10
ENSG00000139083	-0.214293	0.00156333		ENSG00000152092	-0.153737	6.7715e-06		ENSG00000148908	-0.385223	1.03844e-09		ENSG00000182601	-1.40717	1.16193e-16
ENSG00000139117	0.933015	7.05705e-87		ENSG00000152127	0.318956	0.00210229		ENSG00000149177	-0.319745	0.0106633		ENSG00000182957	-0.649667	4.0775e-13
ENSG00000139132	-0.15489	0.0291442		ENSG00000152128	-1.12829	1.44177e-14		ENSG00000149187	0.209628	0.0223171		ENSG00000183020	0.618004	2.675e-06
ENSG00000139146	-0.125749	3.10494e-08		ENSG00000152133	-0.122311	2.36308e-05		ENSG00000149212	-0.192192	0.0311523		ENSG00000183023	-0.626902	4.3535e-07
ENSG00000139278	0.145751	3.06493e-06		ENSG00000152208	-2.16268	1.10297e-60		ENSG00000149231	0.107593	0.0354428		ENSG00000183049	-0.423579	0.00134776
ENSG00000139437	-0.104739	4.92057e-06		ENSG00000152217	-0.719086	1.13344e-21		ENSG00000149256	-0.877841	1.71388e-46		ENSG00000183337	-0.119062	0.040241
ENSG00000139496	0.161413	1.34508e-06		ENSG00000152315	-0.627816	2.37926e-15		ENSG00000149269	-0.320128	6.86895e-06		ENSG00000183454	-0.181877	0.0154282
ENSG00000139505	0.134992	6.48581e-06		ENSG00000152413	-0.108143	0.00149828		ENSG00000149273	-0.204588	0.00211481		ENSG00000183621	0.394114	0.00031651
ENSG00000139668	0.228576	1.85219e-05		ENSG00000152457	-0.163164	0.000121295		ENSG00000149658	0.108772	0.00989168		ENSG00000183765	-0.14357	0.00682832
ENSG00000139687	-0.142123	0.0167822		ENSG00000152492	-0.143953	0.0448516		ENSG00000149806	-0.153264	0.0422417		ENSG00000184005	-1.74776	5.41748e-38
ENSG00000139737	-0.121477	2.35463e-14		ENSG00000152518	-0.417511	9.92414e-05		ENSG00000150337	-0.344431	4.19741e-11		ENSG00000184156	-1.93885	2.3455e-41
ENSG00000139793	0.259784	5.77749e-07		ENSG00000152558	0.195755	0.000395852		ENSG00000150347	0.277812	0.0050206		ENSG00000184182	-0.151113	0.0378236
ENSG00000139832	0.510084	1.13739e-24		ENSG00000152601	0.21708	0.0271049		ENSG00000150477	-0.177179	0.0344968		ENSG00000184207	-0.108619	0.0298673
ENSG00000139946	0.290194	1.53263e-08		ENSG00000152818	0.71958	8.31441e-18		ENSG00000150527	-0.201667	0.00787194		ENSG00000184216	-0.113946	0.00215307
ENSG00000139970	0.515639	1.75826e-23		ENSG00000152926	0.116105	0.0419421		ENSG00000150540	0.358743	2.41372e-06		ENSG00000184384	-0.277801	0.0180406
ENSG00000139971	-0.305441	2.95729e-25		ENSG00000153046	-0.367832	1.62384e-07		ENSG00000150593	0.19411	0.00922958		ENSG00000184432	-0.129497	0.00773926
ENSG00000139974	0.803406	6.1022e-68		ENSG00000153071	0.500349	2.63375e-13		ENSG00000150636	-0.158026	5.69567e-05		ENSG00000184500	-0.174658	0.0280449
ENSG00000140022	0.314991	7.12204e-19		ENSG00000153208	0.595372	4.28354e-08		ENSG00000150681	-0.155305	0.000467938		ENSG00000184524	-0.204735	0.000532705
ENSG00000140199	-0.164034	2.72807e-05		ENSG00000153250	0.918552	1.46737e-16		ENSG00000150753	-0.135837	0.000723049		ENSG00000184574	-0.203416	0.000587571
ENSG00000140264	-0.148048	1.14674e-05		ENSG00000153317	0.67236	1.35571e-13		ENSG00000150995	-0.510758	1.63662e-14		ENSG00000184588	0.752625	0.00034384
ENSG00000140319	-0.114114	2.31188e-05		ENSG00000153551	0.20259	0.0263181		ENSG00000151090	1.01251	6.68219e-22		ENSG00000184640	0.239491	0.00152676
ENSG00000140332	-0.182733	3.19329e-10		ENSG00000153814	-1.22419	1.09723e-34		ENSG00000151151	0.174953	0.0131914		ENSG00000184992	-0.167005	0.000964923
ENSG00000140350	-0.111286	0.0160087		ENSG00000153823	1.18706	2.79997e-33		ENSG00000151240	0.665105	1.20438e-13		ENSG00000185088	-0.195778	0.000673835
ENSG00000140386	0.218795	2.18466e-05		ENSG00000153944	-0.318664	5.33496e-06		ENSG00000151322	0.40812	0.00124312		ENSG00000185215	0.310065	0.000256927
ENSG00000140396	0.186092	0.00100108		ENSG00000154122	0.465819	1.78541e-07		ENSG00000151338	-0.129377	0.00377695		ENSG00000185619	-0.120506	0.0479328
ENSG00000140443	0.108691	0.0162506		ENSG00000154229	-1.10145	3.17299e-29		ENSG00000151413	0.221762	0.00854772		ENSG00000185811	-0.649741	1.55079e-07
ENSG00000140548	-0.26724	6.53047e-07		ENSG00000154237	-0.66615	1.30456e-16		ENSG00000151474	-1.28968	2.5783e-29		ENSG00000185989	-0.424293	1.29684e-09
ENSG00000140575	0.945456	4.69841e-95		ENSG00000154310	-0.16092	0.000690949		ENSG00000151490	-0.15291	0.00543083		ENSG00000186047	-0.421852	4.88033e-05
ENSG00000140577	0.423154	8.37287e-39		ENSG00000154330	-0.332773	1.85389e-05		ENSG00000151491	0.511843	1.86966e-05		ENSG00000186063	-0.392683	8.54615e-07
ENSG00000140678	-0.547309	6.22938e-62		ENSG00000154447	0.325223	5.62552e-06		ENSG00000151702	0.338362	0.000845451		ENSG00000186088	0.253247	0.0272174
ENSG00000140743	0.21645	1.27434e-08		ENSG00000154511	-0.21558	2.84006e-07		ENSG00000151726	0.999605	3.34844e-08		ENSG00000186417	-1.02571	2.22983e-21
ENSG00000140750	-0.174752	2.48852e-06		ENSG00000154639	-0.329157	1.28435e-17		ENSG00000151883	0.199532	0.0439456		ENSG00000186469	0.337486	0.0104859
ENSG00000140853	-0.198814	2.2827e-10		ENSG00000154889	-0.111308	0.00889301		ENSG00000151914	-0.339239	0.000822651		ENSG00000186818	-0.201881	5.86269e-07
ENSG00000140948	0.124117	3.42657e-05		ENSG00000154978	-0.233594	0.0116879		ENSG00000152127	0.262942	0.0291061		ENSG00000187098	0.521451	1.08678e-06
ENSG00000140968	-0.57963	1.30855e-70		ENSG00000155085	-0.172716	2.40722e-09		ENSG00000152128	-1.24687	5.26541e-13		ENSG00000187118	-0.181425	0.0336977
ENSG00000141068	-0.112286	0.00180286		ENSG00000155097	0.314028	3.98656e-06		ENSG00000152133	-0.153192	5.2866e-11		ENSG00000187164	-0.738844	1.08207e-13
ENSG00000141252	0.247372	3.29142e-08		ENSG00000155393	0.233249	0.000225949		ENSG00000152208	-1.90092	2.15496e-56		ENSG00000187239	0.545297	2.28046e-05
ENSG00000141279	0.110949	0.00896682		ENSG00000155629	-0.280905	0.00274071		ENSG00000152217	-0.664042	8.33959e-21		ENSG00000187605	0.340893	0.00185807
ENSG00000141298	-0.484788	1.92375e-12		ENSG00000155903	0.859509	1.68698e-31		ENSG00000152234	-0.111536	0.00736508		ENSG00000187609	-0.108175	0.0377128
ENSG00000141367	0.233876	3.8645e-07		ENSG00000155962	0.121388	0.0134508		ENSG00000152291	-0.145676	0.0114145		ENSG00000187672	-0.875843	1.10899e-15
ENSG00000141429	-0.105547	0.0207546		ENSG00000155970	-0.225797	0.000290031		ENSG00000152315	-0.855283	4.38483e-33		ENSG00000187715	-0.50231	1.012e-11
ENSG00000141441	-0.716845	7.71209e-61		ENSG00000156011	0.60806	6.16894e-09		ENSG00000152457	-0.15292	0.000720904		ENSG00000187764	-0.409679	1.22376e-05
ENSG00000141447	0.185819	0.000128714		ENSG00000156110	-0.442677	4.50735e-08		ENSG00000152518	-0.290958	0.00316445		ENSG00000188001	0.366784	0.0433714
ENSG00000141458	-0.284009	4.1956e-21		ENSG00000156170	-0.141315	0.0118697		ENSG00000152767	0.232112	0.0172229		ENSG00000188033	-0.164273	0.000438721
ENSG00000141503	-0.115628	2.67562e-06		ENSG00000156171	0.137068	0.0477088		ENSG00000152818	0.682652	1.75622e-11		ENSG00000188612	-0.153418	0.00976194
ENSG00000141526	-0.154177	1.30427e-09		ENSG00000156273	-0.352978	0.00530031		ENSG00000152926	0.129247	0.0395449		ENSG00000188641	1.20029	7.8903e-12
ENSG00000141627	0.127201	0.0272742		ENSG00000156299	-0.768048	6.44223e-27		ENSG00000153046	-0.292245	0.00120111		ENSG00000188677	0.295001	0.00119632
ENSG00000141655	0.150436	1.87191e-07		ENSG00000156467	-0.141537	0.0279014		ENSG00000153071	0.683149	1.32169e-16		ENSG00000189091	-0.159548	0.00499015
ENSG00000141664	0.468462	2.92757e-26		ENSG00000156508	-0.19812	0.0478265		ENSG00000153179	0.24678	0.00164787		ENSG00000196083	-0.514493	3.97427e-06
ENSG00000141837	-0.842259	1.0139e-90		ENSG00000156515	-0.293105	5.14572e-08		ENSG00000153208	0.711259	1.15622e-08		ENSG00000196141	0.369579	0.00468154
ENSG00000141968	-0.115156	0.0153094		ENSG00000156531	-0.121115	0.00183229		ENSG00000153250	1.09273	3.9997e-23		ENSG00000196218	-0.417454	0.00087447
ENSG00000142089	0.116472	1.50468e-06		ENSG00000156931	0.415092	1.11703e-07		ENSG00000153317	0.750504	4.3071e-16		ENSG00000196220	-0.599815	1.49133e-09
ENSG00000142192	0.3405	1.80058e-10		ENSG00000157077	-0.211488	1.02728e-17		ENSG00000153814	-1.19612	1.73981e-24		ENSG00000196284	-0.35443	0.00619303
ENSG00000142303	-0.148984	5.91193e-12		ENSG00000157107	1.2113	7.93353e-52		ENSG00000153823	1.03967	4.29393e-20		ENSG00000196352	0.255499	0.000942306
ENSG00000142347	-0.244992	4.85303e-07		ENSG00000157303	-0.185017	2.61661e-06		ENSG00000153933	-0.107239	0.000342363		ENSG00000196369	-0.778426	8.08232e-11
ENSG00000142512	-0.246606	6.08461e-24		ENSG00000157388	-0.990663	9.85642e-52		ENSG00000153944	-0.372385	1.623e-07		ENSG00000196405	-0.501469	5.49529e-09
ENSG00000142534	-0.19033	4.08392e-05		ENSG00000157450	-0.170346	0.025612		ENSG00000154122	0.646702	1.48592e-15		ENSG00000196418	-0.229102	0.0167754
ENSG00000142541	-0.147033	0.00271121		ENSG00000157837	0.262866	0.00154764		ENSG00000154229	-1.03379	6.96332e-20		ENSG00000196498	-0.2454	0.0402305
ENSG00000142552	0.193486	2.35652e-14		ENSG00000157933	-0.494685	7.72582e-13		ENSG00000154237	-0.577287	4.34819e-12		ENSG00000196511	-0.284494	0.0151054
ENSG00000142583	-0.828109	2.02947e-62		ENSG00000157985	0.37432	3.75976e-07		ENSG00000154305	-0.128784	0.0270971		ENSG00000196535	-0.118532	0.023214
ENSG00000142599	0.208303	0.000303978		ENSG00000158092	-0.151426	0.0266983		ENSG00000154310	-0.186806	0.00026738		ENSG00000196576	-0.173709	0.0121163
ENSG00000142634	-0.122258	1.40181e-08		ENSG00000158321	-0.398661	0.000290425		ENSG00000154330	-0.33022	1.58478e-07		ENSG00000196586	-0.333028	1.97917e-15
ENSG00000142676	-0.233269	2.27062e-08		ENSG00000158623	-0.103095	0.0164771		ENSG00000154511	-0.152415	0.00161497		ENSG00000196664	-0.202472	0.000187392
ENSG00000142687	0.110328	0.0139753		ENSG00000158717	-0.130961	0.0010157		ENSG00000154589	0.229091	0.0228946		ENSG00000196715	-0.214635	0.00926388
ENSG00000142875	0.158784	0.00059785		ENSG00000158805	-0.113132	6.2291e-05		ENSG00000154639	-0.199563	6.1037e-05		ENSG00000196730	0.852188	3.24442e-16
ENSG00000142937	-0.125367	0.00233722		ENSG00000158813	1.00834	5.7261e-25		ENSG00000154655	-0.221626	0.0498924		ENSG00000196782	-0.46781	0.00403192
ENSG00000143079	-0.277021	3.38906e-09		ENSG00000159023	-0.386687	4.24496e-09		ENSG00000154723	-0.101984	0.00643917		ENSG00000196843	-0.187259	0.00754344
ENSG00000143110	0.165731	3.25973e-05		ENSG00000159128	-0.247795	0.00149986		ENSG00000154889	-0.132855	0.000449011		ENSG00000196876	-0.132472	0.00740361
ENSG00000143119	-0.287151	2.34338e-11		ENSG00000159189	-0.217014	0.0398372		ENSG00000154930	-0.124678	0.00782407		ENSG00000197070	-0.146495	0.0026215
ENSG00000143153	0.246086	3.96453e-08		ENSG00000159216	-0.552313	1.56949e-06		ENSG00000154978	-0.212396	0.0238805		ENSG00000197119	-0.18611	0.000620451
ENSG00000143158	-0.11194	4.00858e-08		ENSG00000159314	-0.21854	6.48879e-07		ENSG00000155085	-0.163908	2.5749e-08		ENSG00000197147	-0.206121	0.00133577
ENSG00000143164	-0.463872	3.55172e-21		ENSG00000159346	0.124809	0.001719		ENSG00000155393	0.204695	0.00337328		ENSG00000197405	0.377952	7.10882e-05
ENSG00000143179	-0.193926	9.89512e-19		ENSG00000159788	-0.497278	2.24609e-17		ENSG00000155629	-0.344574	0.000896345		ENSG00000197442	-0.479314	0.000210702
ENSG00000143207	0.257466	2.45384e-06		ENSG00000159842	-0.711959	8.39546e-16		ENSG00000155903	0.70785	8.29438e-14		ENSG00000197520	-0.50247	1.13099e-08
ENSG00000143226	0.328493	1.12863e-09		ENSG00000160007	-0.205677	0.000790154		ENSG00000155970	-0.268966	8.6578e-06		ENSG00000197535	0.805901	1.08727e-10
ENSG00000143344	1.60509	6.63983e-96		ENSG00000160094	-0.195056	1.7753e-08		ENSG00000156011	0.984085	2.84688e-21		ENSG00000197548	0.700065	1.16321e-08
ENSG00000143353	0.15658	0.000217062		ENSG00000160190	-0.172781	3.43903e-08		ENSG00000156110	-0.260537	0.00743769		ENSG00000197580	-0.278344	3.92613e-07
ENSG00000143376	0.122927	0.00852361		ENSG00000160191	-0.168128	0.000284026		ENSG00000156170	-0.174649	0.000605328		ENSG00000197584	-0.170788	3.3113e-06
ENSG00000143384	0.161173	7.33819e-06		ENSG00000160208	-0.129935	0.000399356		ENSG00000156171	0.195989	0.0111592		ENSG00000197622	-0.177719	0.018749
ENSG00000143437	0.124419	0.000737152		ENSG00000160219	-0.162864	0.0388254		ENSG00000156299	-0.751962	2.88712e-22		ENSG00000197712	-0.144275	0.0449392
ENSG00000143641	-0.47789	1.72827e-21		ENSG00000160255	-0.210949	0.000901433		ENSG00000156482	-0.21411	0.00133131		ENSG00000197771	-0.13872	0.0312144
ENSG00000143669	-0.192577	0.000230257		ENSG00000160294	-0.114182	0.0452179		ENSG00000156515	-0.149031	0.0497432		ENSG00000197852	-0.207751	8.54594e-07
ENSG00000143776	0.265797	1.22599e-15		ENSG00000160310	-0.203234	0.00557596		ENSG00000156531	-0.17365	5.28662e-08		ENSG00000197943	-0.310451	0.0113378
ENSG00000143878	0.119917	0.000134539		ENSG00000160953	-0.147167	0.00466319		ENSG00000156931	0.370778	3.88365e-06		ENSG00000197959	-0.360049	4.33602e-05
ENSG00000143889	0.172188	4.54909e-07		ENSG00000161091	-0.121651	0.000921212		ENSG00000156958	0.182907	0.0282249		ENSG00000197965	-0.612625	1.37484e-10
ENSG00000143891	0.240527	8.24177e-13		ENSG00000161547	-0.135096	0.0029029		ENSG00000157077	-0.206057	8.57771e-10		ENSG00000198001	-0.171858	0.00652705
ENSG00000143919	-0.157135	0.0101768		ENSG00000161638	-0.139249	9.54317e-06		ENSG00000157107	1.35984	1.14008e-47		ENSG00000198034	-0.240387	0.0444248
ENSG00000143924	-0.527425	4.42383e-31		ENSG00000161791	-0.630783	5.59677e-14		ENSG00000157303	-0.190014	1.2162e-07		ENSG00000198121	-0.239808	0.0461745
ENSG00000143933	-0.185749	0.00589145		ENSG00000162302	-0.126199	0.000279647		ENSG00000157388	-0.745692	8.89597e-27		ENSG00000198189	-0.159619	0.0370772
ENSG00000143947	-0.159837	0.000418556		ENSG00000162367	-0.349022	3.54962e-17		ENSG00000157483	-0.255048	0.00995013		ENSG00000198223	-0.39879	1.38014e-05
ENSG00000143951	0.129915	0.0117818		ENSG00000162374	-0.188273	1.39178e-06		ENSG00000157557	-0.213511	0.0242929		ENSG00000198242	-0.314151	0.00107432
ENSG00000143952	0.169704	0.000616035		ENSG00000162511	-0.384949	3.43949e-07		ENSG00000157782	-0.121853	0.0248282		ENSG00000198246	-0.187059	8.85079e-05
ENSG00000144036	0.241523	1.36055e-05		ENSG00000162599	0.440823	3.10534e-06		ENSG00000157837	0.267802	0.00286851		ENSG00000198258	-0.16856	0.00497156
ENSG00000144218	0.55229	1.30582e-23		ENSG00000162711	-0.105894	0.0114157		ENSG00000157933	-0.413878	3.10134e-08		ENSG00000198286	-0.530668	1.47095e-10
ENSG00000144228	-0.120203	0.0031575		ENSG00000162734	-0.144744	0.000985199		ENSG00000157954	0.116216	0.0336067		ENSG00000198363	0.270678	0.0488999
ENSG00000144451	-0.140308	1.78711e-09		ENSG00000162869	0.243914	0.000869985		ENSG00000157985	0.49547	3.49168e-10		ENSG00000198556	-0.101472	0.0407413
ENSG00000144455	0.439119	7.03354e-14		ENSG00000162923	0.207614	0.00187356		ENSG00000158201	0.338757	0.00381154		ENSG00000198663	-0.132451	0.0484051
ENSG00000144642	0.188155	2.23013e-05		ENSG00000162980	-0.369462	8.89497e-11		ENSG00000158321	-0.348483	0.0129992		ENSG00000198689	-0.168974	0.00130055
ENSG00000144668	-0.138886	0.0151957		ENSG00000163106	-0.179574	0.00319851		ENSG00000158623	-0.120798	0.00321735		ENSG00000198690	-0.129519	0.0008619
ENSG00000144674	0.203046	0.00179475		ENSG00000163110	0.383404	1.21695e-08		ENSG00000158711	-0.10769	0.0121528		ENSG00000198740	-0.27099	0.00693753
ENSG00000144677	0.429867	4.13815e-32		ENSG00000163161	-0.109595	0.00272911		ENSG00000158717	-0.169633	0.000187651		ENSG00000198742	-0.214118	0.0481664
ENSG00000144711	0.490242	6.87976e-41		ENSG00000163162	0.687572	4.47966e-10		ENSG00000158813	1.22612	7.92374e-35		ENSG00000198853	-0.162944	0.000979862
ENSG00000144713	-0.135189	0.00511167		ENSG00000163166	-0.177951	0.000786582		ENSG00000158987	-0.261637	0.0348444		ENSG00000198879	-0.568509	7.13106e-05
ENSG00000144724	-0.202809	0.00259156		ENSG00000163191	-0.178143	3.77706e-05		ENSG00000159023	-0.414056	2.29243e-09		ENSG00000198964	0.487574	0.000137827
ENSG00000144744	-0.135083	3.63978e-06		ENSG00000163219	-0.52358	2.55398e-10		ENSG00000159110	0.227847	0.0193592		ENSG00000203747	-0.64835	5.22603e-14
ENSG00000144746	-0.168443	8.60667e-10		ENSG00000163291	-0.156514	0.000534484		ENSG00000159200	0.259149	0.000388194		ENSG00000204103	0.34915	0.00306672
ENSG00000144791	0.419403	4.59144e-21		ENSG00000163328	0.236029	0.000762692		ENSG00000159216	-0.398107	0.00333804		ENSG00000204472	-0.219875	0.000456562
ENSG00000144893	-0.28413	1.40255e-24		ENSG00000163399	-0.117651	0.0272955		ENSG00000159314	-0.199539	0.000229717		ENSG00000204482	-0.236614	0.00153969
ENSG00000144935	-0.151963	4.53344e-15		ENSG00000163406	-0.242135	7.87296e-06		ENSG00000159388	-0.126519	0.0431142		ENSG00000204592	-0.22874	0.0284997
ENSG00000144959	0.119306	0.000466626		ENSG00000163512	0.211755	3.78525e-05		ENSG00000159788	-0.384615	4.6042e-09		ENSG00000204628	-0.192029	0.0236818
ENSG00000145012	0.299743	6.95133e-07		ENSG00000163513	-0.599107	5.75675e-13		ENSG00000159842	-0.605925	1.32268e-08		ENSG00000204634	-0.394807	0.00421062
ENSG00000145088	0.304147	6.98209e-13		ENSG00000163590	0.294131	0.000265392		ENSG00000160007	-0.253021	0.000881506		ENSG00000204977	-0.167825	0.020152
ENSG00000145246	-0.187722	2.8999e-08		ENSG00000163625	0.486351	7.52908e-07		ENSG00000160179	0.146649	0.0225022		ENSG00000205268	-0.196679	0.0274923
ENSG00000145349	-0.5314	7.12089e-23		ENSG00000163644	-0.17566	0.000533887		ENSG00000160191	-0.112168	0.0312234		ENSG00000205336	-0.735543	1.25821e-17
ENSG00000145390	-0.185472	0.00865459		ENSG00000163694	0.978091	1.47541e-27		ENSG00000160208	-0.167664	9.04255e-07		ENSG00000205423	0.151309	0.0312158
ENSG00000145431	0.898809	1.50472e-36		ENSG00000163755	-0.304054	5.36188e-10		ENSG00000160255	-0.200338	0.00146541		ENSG00000205542	-0.625841	1.76349e-05
ENSG00000145569	-0.217077	2.55787e-07		ENSG00000163812	-0.135322	0.00167239		ENSG00000160551	0.173513	0.0330888		ENSG00000205581	-0.177035	0.00878589
ENSG00000145592	-0.176928	0.000187998		ENSG00000163848	-0.175265	0.0385448		ENSG00000160953	-0.176492	0.000617439		ENSG00000205726	1.39816	1.20124e-32
ENSG00000145604	0.135454	8.53958e-06		ENSG00000163932	-0.206083	0.000211938		ENSG00000161016	-0.187021	0.00427764		ENSG00000205744	-0.124346	0.00975303
ENSG00000145685	-1.2711	2.64702e-95		ENSG00000164010	-0.187526	1.86169e-07		ENSG00000161638	-0.13122	0.00327841		ENSG00000206418	-0.250797	0.00150467
ENSG00000145687	0.190681	0.00470055		ENSG00000164096	-0.105671	0.000175317		ENSG00000161791	-0.67026	2.52942e-19		ENSG00000213064	-0.178113	0.0123879
ENSG00000145703	1.61362	2.3151e-144		ENSG00000164105	0.120277	0.0114157		ENSG00000161921	-0.123465	0.000537681		ENSG00000213445	-0.130952	0.0243287
ENSG00000145725	0.203975	8.79077e-08		ENSG00000164111	0.143436	0.0203752		ENSG00000161970	-0.255691	0.00170959		ENSG00000213585	-0.174466	0.00751609
ENSG00000145730	0.22355	1.17702e-08		ENSG00000164124	0.16546	0.0123431		ENSG00000162244	-0.124245	0.0361177		ENSG00000213654	-0.133399	5.208e-05
ENSG00000145779	0.386887	3.37605e-15		ENSG00000164136	0.23788	0.00046184		ENSG00000162302	-0.164846	1.07875e-08		ENSG00000213676	-0.15999	0.000199002
ENSG00000145781	0.174398	0.00666012		ENSG00000164144	-0.230992	0.000476574		ENSG00000162367	-0.25706	1.71114e-07		ENSG00000214021	-0.128103	0.00185734
ENSG00000145819	-0.442398	5.60207e-11		ENSG00000164219	-0.144407	0.00290246		ENSG00000162374	-0.202851	3.81265e-07		ENSG00000214226	-0.170381	0.00768156
ENSG00000145864	0.177218	0.00018806		ENSG00000164292	0.534492	1.04821e-21		ENSG00000162434	0.233228	0.00362199		ENSG00000214787	0.403855	5.37367e-05
ENSG00000145868	0.138347	0.000167644		ENSG00000164300	0.760186	2.64799e-25		ENSG00000162511	-0.424513	8.52157e-08		ENSG00000216937	-0.216483	0.0249332
ENSG00000145982	-0.129615	0.0274481		ENSG00000164329	0.282301	0.000798052		ENSG00000162545	-0.188592	0.0493708		ENSG00000219626	-0.173598	0.0222902
ENSG00000145990	0.202902	8.56461e-09		ENSG00000164535	-0.287096	3.24816e-11		ENSG00000162599	0.46804	5.00698e-05		ENSG00000225830	-0.147549	0.0123879
ENSG00000146090	-1.17178	1.22732e-183		ENSG00000164543	-0.362431	1.08541e-22		ENSG00000162734	-0.239372	3.66569e-10		ENSG00000227124	-0.135195	0.0238603
ENSG00000146143	-0.107052	0.0276795		ENSG00000164574	-0.646203	3.16617e-28		ENSG00000162819	-0.278477	1.40144e-10		ENSG00000231389	-0.229031	0.00925398
ENSG00000146247	0.154416	0.00307237		ENSG00000164674	-0.37416	1.67805e-10		ENSG00000162869	0.258623	0.00139008		ENSG00000231887	0.181494	0.0269254
ENSG00000146350	-0.116719	1.54528e-05		ENSG00000164733	0.392417	5.10224e-05		ENSG00000162923	0.303464	6.46071e-05		ENSG00000234745	-0.308234	0.000758224
ENSG00000146376	1.29231	1.66025e-121		ENSG00000164808	0.580015	1.30653e-08		ENSG00000162980	-0.454827	1.00901e-13		ENSG00000236287	-0.18211	0.0237239
ENSG00000146409	0.305877	8.68853e-15		ENSG00000164830	-1.44848	8.67526e-59		ENSG00000163106	-0.164371	0.0218935		ENSG00000240972	-0.162048	0.0377128
ENSG00000146416	-0.284755	2.77503e-11		ENSG00000164983	0.177151	0.029127		ENSG00000163110	0.414228	2.30397e-07		ENSG00000241468	-0.127811	0.00152676
ENSG00000146463	0.112413	0.0265174		ENSG00000164985	-0.137839	0.0018674		ENSG00000163162	0.798187	1.49506e-09		ENSG00000248905	1.03461	3.40676e-11
ENSG00000146555	-1.41398	4.51681e-185		ENSG00000165025	-0.393278	4.9076e-07		ENSG00000163191	-0.140586	0.00650191		ENSG00000250312	-0.247774	0.000747607
ENSG00000146828	-0.175905	1.22466e-17		ENSG00000165029	1.1164	5.21465e-32		ENSG00000163219	-0.528755	2.0256e-09		ENSG00000254087	-0.489819	0.000668497
ENSG00000147010	-0.572775	9.34912e-34		ENSG00000165072	0.497529	7.31934e-13		ENSG00000163291	-0.27821	2.12503e-11		ENSG00000258289	-0.165799	0.00301721
ENSG00000147065	-0.111885	0.030237		ENSG00000165097	-0.246148	4.38207e-07		ENSG00000163328	0.180687	0.0294123		ENSG00000260314	1.77708	1.22431e-27
ENSG00000147202	-0.341367	3.02863e-10		ENSG00000165209	-0.61997	4.24643e-31		ENSG00000163399	-0.134215	0.0143855		ENSG00000263001	-0.208779	0.0481664
ENSG00000147274	-0.133515	0.000279078		ENSG00000165275	-0.107231	0.00574181		ENSG00000163406	-0.193622	0.00247701		ENSG00000265972	0.418556	0.00363569
ENSG00000147324	0.453738	9.67426e-31		ENSG00000165322	-0.434283	3.26821e-08		ENSG00000163491	-0.209424	0.0036616		ENSG00000266028	-0.874132	5.44584e-12
ENSG00000147454	-0.66467	1.87915e-39		ENSG00000165359	-0.13103	0.00841328		ENSG00000163512	0.359709	1.48416e-09		ENSG00000271605	-0.198394	0.00421354
ENSG00000147459	0.243092	3.13018e-05		ENSG00000165392	-0.12153	0.0385163		ENSG00000163513	-0.369872	5.89707e-05		ENSG00000272325	-0.27619	6.20103e-05
ENSG00000147586	-0.24403	3.84808e-07		ENSG00000165457	0.210779	3.00091e-06		ENSG00000163536	-0.101378	0.0472276		ENSG00000273749	-0.869707	1.64253e-14
ENSG00000147604	-0.135885	9.62411e-06		ENSG00000165475	0.267656	3.95016e-07		ENSG00000163563	-0.143379	0.00922958		ENSG00000275023	-0.259655	7.60452e-05
ENSG00000148090	0.15635	0.000760392		ENSG00000165476	-0.129943	0.0252989		ENSG00000163590	0.574564	2.4294e-09		ENSG00000275395	-0.658099	0.000103631
ENSG00000148154	-0.291642	1.18452e-09		ENSG00000165675	0.246195	0.00182748		ENSG00000163625	0.604493	7.65437e-08		ENSG00000277443	-0.404053	3.12504e-07
ENSG00000148180	-0.323935	7.41878e-13		ENSG00000165795	-0.134576	0.00665252		ENSG00000163644	-0.210083	3.94823e-05		ENSG00000277586	-0.20836	0.0497348
ENSG00000148219	0.422188	6.17281e-24		ENSG00000165914	-0.155692	0.0196134		ENSG00000163694	0.982102	1.79031e-19		ENSG00000288701	-0.230278	0.0473872
ENSG00000148303	-0.116871	0.00470098		ENSG00000166002	-0.113219	0.0158514		ENSG00000163755	-0.29272	1.28329e-06
ENSG00000148411	0.148285	1.02578e-09		ENSG00000166024	-0.192672	0.0040179		ENSG00000163814	0.130286	0.0231969
ENSG00000148429	-0.609202	1.10504e-40		ENSG00000166033	-0.733248	9.36191e-57		ENSG00000163913	0.103243	0.046568
ENSG00000148484	0.22844	2.87443e-08		ENSG00000166128	0.412566	3.945e-09		ENSG00000163932	-0.173518	0.00315455
ENSG00000148516	-0.544067	1.90533e-37		ENSG00000166224	0.143222	0.00657884		ENSG00000163939	0.199888	0.0116506
ENSG00000148634	0.142947	0.0249169		ENSG00000166225	0.140258	0.0347003		ENSG00000164010	-0.100361	0.0209971
ENSG00000148655	-0.283004	1.61319e-05		ENSG00000166233	0.17954	0.0480738		ENSG00000164105	0.158691	0.00143554
ENSG00000148700	0.17263	1.06789e-08		ENSG00000166272	0.207456	0.00158836		ENSG00000164124	0.21211	0.000872804
ENSG00000148737	0.126717	0.0110433		ENSG00000166295	-0.162987	0.0212875		ENSG00000164136	0.342652	2.91052e-05
ENSG00000148908	-0.34417	2.02213e-21		ENSG00000166340	0.128497	0.00909799		ENSG00000164182	0.293109	0.000500501
ENSG00000148948	-0.184908	5.75041e-07		ENSG00000166532	0.320062	2.05038e-09		ENSG00000164292	0.463008	1.95685e-14
ENSG00000149177	-0.383193	1.91812e-08		ENSG00000166669	-0.452806	1.46988e-12		ENSG00000164300	0.734444	1.75036e-26
ENSG00000149187	0.18119	0.000205937		ENSG00000166762	-0.125435	0.0058481		ENSG00000164329	0.394557	7.43544e-06
ENSG00000149212	-0.187907	1.0428e-05		ENSG00000166801	0.103755	0.028749		ENSG00000164430	-0.102047	0.0296851
ENSG00000149256	-0.964474	4.86644e-156		ENSG00000166848	-0.178515	8.96265e-05		ENSG00000164535	-0.260459	1.78903e-06
ENSG00000149269	-0.229564	2.1701e-09		ENSG00000166927	0.410221	1.07782e-05		ENSG00000164543	-0.291069	6.96106e-16
ENSG00000149273	-0.121793	0.00284181		ENSG00000166928	0.175724	0.00106546		ENSG00000164574	-0.551024	1.4007e-11
ENSG00000149289	0.105059	0.0143876		ENSG00000166949	-0.305077	7.16809e-06		ENSG00000164587	-0.247362	0.00131197
ENSG00000149311	-0.184181	0.00203338		ENSG00000166979	0.109757	0.00678142		ENSG00000164674	-0.1934	0.00616866
ENSG00000149571	-0.13382	1.18502e-10		ENSG00000167081	0.232797	0.0203329		ENSG00000164808	0.838627	8.04296e-20
ENSG00000150093	0.142608	0.00047946		ENSG00000167216	0.164776	0.00266086		ENSG00000164830	-1.24782	5.15329e-34
ENSG00000150337	-0.415651	1.59603e-46		ENSG00000167291	-0.182791	0.0208621		ENSG00000164933	-0.111443	0.0164334
ENSG00000150347	0.137597	0.0120036		ENSG00000167522	-0.270008	0.00263776		ENSG00000164970	0.149784	0.00592693
ENSG00000150477	-0.117771	0.0132612		ENSG00000167528	-0.132785	0.000227459		ENSG00000165025	-0.297252	0.00486689
ENSG00000150527	-0.274765	1.72077e-14		ENSG00000167566	-0.134953	0.00368004		ENSG00000165029	0.979033	3.3527e-19
ENSG00000150540	0.379634	1.66438e-16		ENSG00000167693	-0.378411	1.39411e-19		ENSG00000165072	0.481608	1.91537e-09
ENSG00000150593	0.14792	0.000258446		ENSG00000167703	-0.125801	0.0175208		ENSG00000165097	-0.165198	0.00667034
ENSG00000150625	-0.120954	0.0185648		ENSG00000167792	-0.125117	0.000748829		ENSG00000165181	-0.286762	0.00335045
ENSG00000150636	-0.113588	4.41781e-05		ENSG00000167851	-0.198236	6.34599e-05		ENSG00000165209	-0.483209	2.20588e-19
ENSG00000150672	-0.183964	0.00160998		ENSG00000167895	-0.142263	0.033643		ENSG00000165280	-0.104269	0.0241682
ENSG00000150681	-0.120095	9.21794e-07		ENSG00000168016	-0.223582	1.17321e-05		ENSG00000165322	-0.510428	2.67504e-10
ENSG00000150907	-0.108905	0.0129295		ENSG00000168214	1.03669	6.17224e-21		ENSG00000165475	0.317755	8.33076e-08
ENSG00000150938	0.193582	1.35301e-12		ENSG00000168216	-0.221538	0.00010977		ENSG00000165704	-0.110031	0.0284014
ENSG00000150995	-0.475781	6.62069e-31		ENSG00000168297	0.217325	0.000108529		ENSG00000165795	-0.131044	0.0426872
ENSG00000151090	1.17166	6.38554e-75		ENSG00000168329	-1.14471	1.42445e-52		ENSG00000165801	-0.11187	0.0300626
ENSG00000151151	0.126182	0.000631213		ENSG00000168675	-0.310014	0.0021569		ENSG00000166002	-0.181819	2.71268e-05
ENSG00000151229	0.131847	0.0150536		ENSG00000168918	-0.852745	3.52372e-21		ENSG00000166012	-0.209926	0.00518748
ENSG00000151240	0.684205	5.05726e-41		ENSG00000168958	-0.138742	0.0269364		ENSG00000166033	-0.703266	3.49018e-53
ENSG00000151276	-0.214227	1.26221e-05		ENSG00000169122	0.272251	0.00457435		ENSG00000166068	0.269343	0.0425339
ENSG00000151322	0.251723	0.00018874		ENSG00000169288	-0.133146	0.0125928		ENSG00000166128	0.268791	0.00132713
ENSG00000151338	-0.112289	4.54133e-06		ENSG00000169313	-1.29916	1.42036e-49		ENSG00000166224	0.119817	0.0323065
ENSG00000151414	0.140055	0.00466983		ENSG00000169372	-0.177026	0.0236156		ENSG00000166272	0.233001	0.00288292
ENSG00000151466	-0.15088	0.00296287		ENSG00000169403	-0.361033	5.63004e-17		ENSG00000166323	-0.122237	0.000385313
ENSG00000151474	-1.29016	4.1092e-90		ENSG00000169554	0.593606	1.32434e-10		ENSG00000166503	-0.207591	8.81079e-08
ENSG00000151490	-0.187209	8.71354e-12		ENSG00000169756	-0.517359	7.05387e-11		ENSG00000166532	0.329099	3.20196e-08
ENSG00000151491	0.33089	2.55745e-07		ENSG00000169826	0.237571	1.15525e-05		ENSG00000166575	0.291095	5.93636e-05
ENSG00000151694	-0.112873	0.00441902		ENSG00000169891	0.116897	0.0434611		ENSG00000166669	-0.412995	7.68495e-09
ENSG00000151702	0.18335	0.00154874		ENSG00000169896	-0.367969	1.66454e-09		ENSG00000166710	-0.233631	0.00968328
ENSG00000151726	0.91128	3.49482e-23		ENSG00000169902	0.241377	0.000380587		ENSG00000166794	-0.101319	0.0100608
ENSG00000151746	-0.106028	0.0193695		ENSG00000169967	-0.184401	0.0177234		ENSG00000166927	0.515928	7.12868e-06
ENSG00000151883	0.176354	0.0022361		ENSG00000170017	-0.539695	1.25535e-11		ENSG00000166928	0.207972	0.00126076
ENSG00000151893	0.154089	0.000348009		ENSG00000170085	-0.123256	0.0049651		ENSG00000166949	-0.269972	0.000144911
ENSG00000151914	-0.433121	7.89137e-18		ENSG00000170153	0.281885	0.0104054		ENSG00000166979	0.126831	0.0306295
ENSG00000152127	0.21143	0.00295017		ENSG00000170396	0.308838	0.00142762		ENSG00000167081	0.278961	0.0109345
ENSG00000152128	-1.11752	4.74895e-31		ENSG00000170522	-0.139539	0.00147596		ENSG00000167196	-0.109787	0.0101548
ENSG00000152133	-0.111945	1.02753e-10		ENSG00000170525	-0.340447	0.000496302		ENSG00000167216	0.128266	0.0295713
ENSG00000152208	-1.85602	2.246e-155		ENSG00000170542	-0.841226	1.00403e-39		ENSG00000167526	-0.211195	0.0401282
ENSG00000152217	-0.735368	1.07377e-66		ENSG00000170571	0.283428	8.58628e-05		ENSG00000167528	-0.113615	0.000585277
ENSG00000152315	-0.802461	3.28371e-76		ENSG00000170581	0.185857	0.000425428		ENSG00000167552	-0.133316	0.0197396
ENSG00000152348	-0.184339	1.81355e-05		ENSG00000170638	-0.184709	1.19445e-06		ENSG00000167693	-0.383973	1.29555e-22
ENSG00000152492	-0.132478	0.00131164		ENSG00000170677	-0.789778	5.47856e-26		ENSG00000167792	-0.104192	0.0267056
ENSG00000152518	-0.26025	3.21076e-06		ENSG00000170759	-0.149487	0.0167704		ENSG00000167851	-0.202928	2.99049e-05
ENSG00000152520	0.161306	0.00346671		ENSG00000170791	-0.199354	2.4288e-10		ENSG00000167987	0.113365	0.0175929
ENSG00000152558	0.138131	7.75862e-06		ENSG00000170873	1.11233	1.13168e-22		ENSG00000168016	-0.152685	0.00861295
ENSG00000152601	0.159992	0.0143306		ENSG00000170921	-0.394913	1.30689e-05		ENSG00000168028	-0.213553	0.000200394
ENSG00000152767	0.189721	0.000130885		ENSG00000171051	-0.105254	0.00851366		ENSG00000168036	0.343291	8.66326e-06
ENSG00000152818	0.566168	3.23976e-21		ENSG00000171100	0.164603	0.00371292		ENSG00000168209	-0.203937	0.00331623
ENSG00000152926	0.109754	0.000158401		ENSG00000171115	0.136887	0.0213069		ENSG00000168214	1.3461	2.90371e-28
ENSG00000153046	-0.366625	9.54364e-16		ENSG00000171132	0.239291	0.00707183		ENSG00000168216	-0.152262	0.0184657
ENSG00000153071	0.503708	4.29141e-33		ENSG00000171189	-0.138086	0.000374664		ENSG00000168297	0.166062	0.011947
ENSG00000153113	0.115738	0.0197736		ENSG00000171206	-0.119192	0.000278981		ENSG00000168329	-0.937239	2.16327e-44
ENSG00000153179	0.204213	4.36367e-06		ENSG00000171291	-0.127798	0.000177347		ENSG00000168386	-0.149121	0.0401993
ENSG00000153187	0.153343	0.000414382		ENSG00000171298	-0.111064	0.0175784		ENSG00000168710	-0.185492	3.59126e-05
ENSG00000153208	0.713692	7.02972e-21		ENSG00000171310	-0.955652	8.79199e-26		ENSG00000168918	-0.74072	5.49395e-15
ENSG00000153250	1.15441	8.23647e-64		ENSG00000171316	-0.424517	3.93632e-09		ENSG00000169084	0.292236	0.000744964
ENSG00000153317	0.655447	7.67589e-34		ENSG00000171488	-0.289092	6.89507e-05		ENSG00000169122	0.280688	0.00387743
ENSG00000153551	0.223666	3.65183e-06		ENSG00000171587	-1.33571	1.30157e-46		ENSG00000169288	-0.114612	0.0340425
ENSG00000153707	-0.121442	0.0219691		ENSG00000171603	-0.217584	4.28584e-05		ENSG00000169299	-0.112978	6.02491e-06
ENSG00000153814	-1.04125	5.17466e-54		ENSG00000171608	-0.216859	0.00116188		ENSG00000169313	-1.31216	2.933e-57
ENSG00000153823	1.24232	2.79809e-96		ENSG00000171631	-0.11657	0.0100336		ENSG00000169403	-0.204767	6.62774e-05
ENSG00000153944	-0.271536	7.3313e-11		ENSG00000171643	-0.484436	5.56011e-20		ENSG00000169508	0.282809	0.00377695
ENSG00000154122	0.452524	2.9896e-20		ENSG00000171659	-0.285703	4.80763e-05		ENSG00000169554	0.722679	3.87934e-12
ENSG00000154229	-0.92938	1.47678e-60		ENSG00000171680	0.116252	0.0208621		ENSG00000169570	-0.130436	0.0121618
ENSG00000154237	-0.534201	1.66661e-31		ENSG00000171700	-0.195472	9.45803e-07		ENSG00000169756	-0.459837	2.13971e-07
ENSG00000154309	-0.264171	0.000874101		ENSG00000171735	-0.162231	0.0371047		ENSG00000169826	0.282723	2.83411e-05
ENSG00000154310	-0.224536	3.15539e-20		ENSG00000171791	-0.414746	3.15844e-05		ENSG00000169896	-0.301187	9.71635e-05
ENSG00000154330	-0.345768	5.9867e-20		ENSG00000171914	-1.37242	1.27142e-116		ENSG00000169902	0.393298	2.68726e-06
ENSG00000154511	-0.197273	2.42087e-13		ENSG00000171943	-0.733665	6.68186e-16		ENSG00000169967	-0.197315	0.0240381
ENSG00000154589	0.250218	2.22831e-08		ENSG00000171984	-0.208468	2.42964e-06		ENSG00000170017	-0.423039	5.61785e-06
ENSG00000154639	-0.236297	1.11976e-18		ENSG00000171988	0.224632	0.0118697		ENSG00000170113	0.115355	0.0230925
ENSG00000154655	-0.154049	0.0101249		ENSG00000172086	-0.168722	0.000790154		ENSG00000170153	0.379469	0.00245902
ENSG00000154803	0.107202	3.23966e-05		ENSG00000172159	0.206991	0.00140853		ENSG00000170456	0.137908	0.0269134
ENSG00000154822	-0.175098	0.00149181		ENSG00000172216	-0.191578	0.00451901		ENSG00000170542	-0.819427	3.98718e-33
ENSG00000154845	0.158671	2.6812e-05		ENSG00000172243	0.227003	0.00841575		ENSG00000170571	0.460723	8.97262e-10
ENSG00000154978	-0.134852	0.0162696		ENSG00000172292	0.410775	2.20336e-07		ENSG00000170638	-0.177951	2.45013e-06
ENSG00000155085	-0.123372	1.07421e-08		ENSG00000172493	0.391431	1.17133e-05		ENSG00000170677	-0.797762	1.7455e-23
ENSG00000155093	-0.103836	2.78297e-05		ENSG00000172667	-0.706486	8.83711e-33		ENSG00000170776	0.40774	9.90501e-06
ENSG00000155097	0.34364	1.96623e-16		ENSG00000172716	0.17855	8.07109e-05		ENSG00000170791	-0.150275	0.000665379
ENSG00000155313	0.102667	0.0388863		ENSG00000172757	-0.188899	0.00121864		ENSG00000170873	1.17843	2.5089e-18
ENSG00000155393	0.165763	1.9016e-05		ENSG00000172765	0.363143	6.48607e-05		ENSG00000171055	-0.16165	0.0282759
ENSG00000155506	0.143566	0.000161089		ENSG00000172869	0.31279	5.557e-05		ENSG00000171100	0.258051	8.29238e-05
ENSG00000155629	-0.341575	7.99256e-10		ENSG00000172939	0.128891	0.0306761		ENSG00000171115	0.158929	0.01245
ENSG00000155660	0.18912	2.62969e-09		ENSG00000172985	-0.49026	5.78939e-05		ENSG00000171132	0.332083	0.000811347
ENSG00000155792	-0.161887	0.000276672		ENSG00000173020	-0.15831	0.000740264		ENSG00000171189	-0.162201	0.00975929
ENSG00000155903	0.835394	3.41487e-62		ENSG00000173166	0.297103	0.000882131		ENSG00000171291	-0.166512	4.1202e-12
ENSG00000155926	0.220371	0.000268646		ENSG00000173193	0.2919	0.0018674		ENSG00000171298	-0.162815	0.000260011
ENSG00000155962	0.192276	2.46959e-07		ENSG00000173221	-0.147953	0.000221321		ENSG00000171310	-1.06073	3.37791e-16
ENSG00000155970	-0.261263	1.25763e-13		ENSG00000173406	-0.223247	0.000230933		ENSG00000171316	-0.520513	2.66773e-09
ENSG00000156011	0.976992	4.56267e-62		ENSG00000173418	-0.18175	1.07924e-05		ENSG00000171488	-0.435264	3.07915e-08
ENSG00000156110	-0.314996	2.53305e-09		ENSG00000173436	-0.33293	4.73386e-08		ENSG00000171587	-0.935389	2.83644e-32
ENSG00000156170	-0.179561	5.74261e-10		ENSG00000173482	0.456102	1.20715e-07		ENSG00000171603	-0.200972	0.000665379
ENSG00000156171	0.136182	0.00062107		ENSG00000173517	1.2061	3.63533e-48		ENSG00000171631	-0.181129	2.63883e-08
ENSG00000156273	-0.244168	0.00108126		ENSG00000173530	-0.166181	0.001213		ENSG00000171643	-0.451237	5.38921e-20
ENSG00000156299	-0.780434	1.03401e-72		ENSG00000173542	-0.159306	0.0494635		ENSG00000171659	-0.406179	1.18055e-11
ENSG00000156467	-0.139607	8.99746e-05		ENSG00000173706	-0.147895	0.00138552		ENSG00000171700	-0.198417	2.2826e-08
ENSG00000156482	-0.134909	0.000348255		ENSG00000173744	1.35825	1.56896e-41		ENSG00000171729	-0.152979	0.0484466
ENSG00000156508	-0.185909	0.000735876		ENSG00000173875	-0.169515	3.81938e-08		ENSG00000171766	-0.17325	0.000335841
ENSG00000156639	0.287729	1.58695e-06		ENSG00000173905	0.133039	0.0320696		ENSG00000171791	-0.518605	4.8099e-07
ENSG00000156931	0.336657	3.08011e-10		ENSG00000173950	-0.171741	1.51998e-05		ENSG00000171793	-0.107031	0.000207779
ENSG00000156958	0.167265	0.000106769		ENSG00000174125	-0.183439	0.00918727		ENSG00000171843	0.125096	0.0190242
ENSG00000157077	-0.197436	1.35849e-31		ENSG00000174456	-0.111022	0.00356242		ENSG00000171858	-0.220245	0.00643363
ENSG00000157106	0.15664	0.00087065		ENSG00000174473	0.686501	1.91624e-10		ENSG00000171862	0.265311	0.0111344
ENSG00000157107	1.24543	3.28431e-99		ENSG00000174574	-0.104964	0.00401589		ENSG00000171863	-0.129426	0.0304271
ENSG00000157303	-0.20878	1.44293e-29		ENSG00000174705	0.312888	0.000771105		ENSG00000171914	-1.25214	4.63729e-103
ENSG00000157388	-0.765956	5.45439e-108		ENSG00000174989	-0.143828	0.0170207		ENSG00000171943	-0.628219	2.96369e-15
ENSG00000157483	-0.267178	6.65799e-07		ENSG00000175048	0.225905	0.00863289		ENSG00000171988	0.288558	0.00292749
ENSG00000157514	0.102311	0.00153709		ENSG00000175115	-0.231996	0.0156867		ENSG00000172081	0.151396	0.0225618
ENSG00000157540	0.174832	0.00220056		ENSG00000175215	-0.122888	0.0038243		ENSG00000172216	-0.350705	1.58603e-07
ENSG00000157557	-0.191731	2.44742e-05		ENSG00000175265	-0.11457	0.00266375		ENSG00000172243	0.235387	0.0188387
ENSG00000157600	0.206448	6.76423e-08		ENSG00000175309	-0.150443	0.0371047		ENSG00000172292	0.478401	3.12731e-10
ENSG00000157601	0.137341	8.46318e-05		ENSG00000175455	0.167732	0.00587888		ENSG00000172428	-0.148598	0.000683844
ENSG00000157837	0.239461	8.66872e-06		ENSG00000175471	1.22364	5.19293e-43		ENSG00000172493	0.344235	0.00400673
ENSG00000157933	-0.423417	1.43792e-22		ENSG00000175727	-0.184441	0.00770387		ENSG00000172667	-0.760184	1.68595e-41
ENSG00000157985	0.431104	3.85776e-22		ENSG00000175899	-0.645775	3.44423e-12		ENSG00000172716	0.194177	0.000540818
ENSG00000158201	0.194816	0.00196541		ENSG00000175931	-0.21799	4.33095e-05		ENSG00000172757	-0.178572	0.0192381
ENSG00000158321	-0.365554	2.86948e-07		ENSG00000176142	0.106083	0.0320465		ENSG00000172765	0.473271	7.67481e-08
ENSG00000158623	-0.115051	2.53276e-08		ENSG00000176225	-0.807338	1.53329e-24		ENSG00000172869	0.336389	0.000108248
ENSG00000158717	-0.13333	2.26581e-08		ENSG00000176390	-0.159628	0.0181754		ENSG00000172985	-0.642102	2.10816e-06
ENSG00000158813	1.16639	5.472e-61		ENSG00000176533	-0.559384	1.46485e-15		ENSG00000173153	-0.118298	0.00039064
ENSG00000158987	-0.207562	0.000997656		ENSG00000176597	-0.558467	3.84776e-16		ENSG00000173166	0.282043	0.000807936
ENSG00000159023	-0.381075	1.70701e-19		ENSG00000176658	0.338043	6.35117e-10		ENSG00000173193	0.291124	0.00564619
ENSG00000159082	0.165625	6.93228e-06		ENSG00000176783	0.137543	0.00991341		ENSG00000173198	-0.100253	0.0063922
ENSG00000159110	0.176148	0.000760318		ENSG00000176788	-0.233781	0.00494319		ENSG00000173221	-0.125304	0.00821661
ENSG00000159128	-0.104074	0.0420534		ENSG00000176853	0.186789	0.000588807		ENSG00000173369	-0.36104	0.000522436
ENSG00000159189	-0.127885	0.0357936		ENSG00000176974	0.183676	8.73319e-05		ENSG00000173418	-0.172857	4.74096e-05
ENSG00000159200	0.244471	2.57409e-12		ENSG00000177058	-0.142665	0.0388832		ENSG00000173436	-0.416667	8.52157e-08
ENSG00000159216	-0.458633	3.35474e-10		ENSG00000177119	0.240408	0.000422378		ENSG00000173482	0.57632	6.52946e-09
ENSG00000159314	-0.145543	3.21668e-06		ENSG00000177189	-0.459803	6.98798e-09		ENSG00000173517	1.25564	1.12669e-45
ENSG00000159346	0.108603	2.29024e-06		ENSG00000177200	-0.520489	4.04147e-10		ENSG00000173530	-0.225463	0.00202444
ENSG00000159592	0.107303	0.022543		ENSG00000177548	-0.139449	1.39421e-05		ENSG00000173542	-0.267458	0.000735956
ENSG00000159788	-0.398572	4.60995e-27		ENSG00000177570	-0.299063	7.95374e-05		ENSG00000173744	1.55772	5.30755e-47
ENSG00000159842	-0.489396	1.24003e-16		ENSG00000177575	2.15376	1.81758e-70		ENSG00000173812	-0.189363	0.0136295
ENSG00000160007	-0.202176	1.59639e-06		ENSG00000177663	-0.442895	4.99671e-08		ENSG00000173821	0.266682	0.0108
ENSG00000160094	-0.116643	5.60669e-07		ENSG00000177675	0.807191	3.42298e-17		ENSG00000173905	0.242112	0.000348778
ENSG00000160190	-0.102342	2.75541e-05		ENSG00000177885	-0.257529	0.00520791		ENSG00000173933	-0.106508	0.0387811
ENSG00000160191	-0.185362	1.53605e-16		ENSG00000178425	0.242963	3.39879e-05		ENSG00000174125	-0.259364	9.57607e-05
ENSG00000160255	-0.18806	2.2067e-08		ENSG00000178573	0.352184	0.00022888		ENSG00000174130	-0.107179	0.00881216
ENSG00000160712	-0.141579	0.000229162		ENSG00000178695	-0.32275	3.64574e-06		ENSG00000174231	-0.155368	0.00159192
ENSG00000160953	-0.201322	7.46152e-15		ENSG00000178764	0.230797	0.00313419		ENSG00000174238	-0.145624	0.0282744
ENSG00000161011	0.161462	2.62704e-06		ENSG00000178904	-0.18564	1.24686e-06		ENSG00000174473	0.678105	1.27306e-08
ENSG00000161091	-0.11027	2.81853e-07		ENSG00000178927	-0.197379	1.19857e-05		ENSG00000174485	-0.194978	0.0462239
ENSG00000161638	-0.113325	1.74717e-10		ENSG00000178950	-0.217426	0.000192462		ENSG00000174705	0.370346	0.000778872
ENSG00000161791	-0.636389	2.64082e-48		ENSG00000178951	-0.144159	0.00116188		ENSG00000174748	-0.171725	0.0153868
ENSG00000161813	0.143868	0.000545246		ENSG00000178974	0.160586	0.029127		ENSG00000175066	0.134725	0.0334481
ENSG00000161970	-0.190339	8.93982e-06		ENSG00000179051	-0.168244	0.000527919		ENSG00000175115	-0.218841	0.0412654
ENSG00000162302	-0.130935	4.64423e-21		ENSG00000179104	0.169041	0.0228661		ENSG00000175265	-0.136019	0.00311584
ENSG00000162367	-0.309927	4.69088e-36		ENSG00000179364	-0.134369	0.0230565		ENSG00000175455	0.141604	0.0302977
ENSG00000162374	-0.177926	6.36645e-15		ENSG00000179583	-0.314068	0.000190245		ENSG00000175471	1.3475	8.09166e-69
ENSG00000162434	0.182568	0.000126711		ENSG00000179715	-0.162602	0.0273507		ENSG00000175899	-0.687278	1.6822e-14
ENSG00000162496	-0.195328	2.49995e-11		ENSG00000179832	0.140146	0.00909154		ENSG00000175931	-0.146067	0.0322358
ENSG00000162511	-0.300558	4.28626e-11		ENSG00000180233	-0.430356	3.73579e-09		ENSG00000176142	0.149201	0.0120954
ENSG00000162542	0.111512	0.000117488		ENSG00000180263	0.249443	3.43903e-08		ENSG00000176225	-0.573456	1.06158e-12
ENSG00000162545	-0.117583	0.0227574		ENSG00000180354	-0.168769	0.00299266		ENSG00000176390	-0.136334	0.047027
ENSG00000162599	0.488438	6.86179e-17		ENSG00000180448	-0.106168	0.0165247		ENSG00000176533	-0.520199	1.18319e-10
ENSG00000162704	0.133603	5.57001e-05		ENSG00000180628	0.233244	0.000367517		ENSG00000176597	-0.584815	1.83105e-34
ENSG00000162734	-0.101887	0.000575455		ENSG00000180817	-0.216815	1.50651e-06		ENSG00000176658	0.384273	1.45334e-08
ENSG00000162819	-0.149246	1.64471e-07		ENSG00000180917	-0.111566	0.00152299		ENSG00000176783	0.220202	0.000796031
ENSG00000162869	0.184273	2.78297e-05		ENSG00000180998	-0.101483	0.00573364		ENSG00000176853	0.236707	0.000138152
ENSG00000162923	0.285068	2.8235e-10		ENSG00000181192	-0.182932	1.9982e-05		ENSG00000176953	-0.109143	0.0283512
ENSG00000162980	-0.36082	1.52059e-23		ENSG00000181467	0.270455	1.26448e-10		ENSG00000176974	0.248346	2.49897e-05
ENSG00000163032	-0.120391	0.0229744		ENSG00000181481	0.142096	0.015447		ENSG00000177119	0.21303	0.0106548
ENSG00000163106	-0.218445	2.58988e-11		ENSG00000181631	-0.310719	1.59381e-13		ENSG00000177189	-0.411489	1.95634e-06
ENSG00000163110	0.400113	4.75031e-21		ENSG00000181690	-0.290099	1.88165e-10		ENSG00000177200	-0.437379	3.59659e-07
ENSG00000163131	0.219333	1.5969e-06		ENSG00000181804	0.685605	1.49538e-11		ENSG00000177570	-0.302334	0.0001301
ENSG00000163162	0.733946	3.27818e-24		ENSG00000181982	0.223232	0.000328215		ENSG00000177575	2.33586	1.37798e-60
ENSG00000163191	-0.104849	9.8043e-06		ENSG00000182022	0.491502	3.10534e-06		ENSG00000177600	-0.284239	0.00046416
ENSG00000163219	-0.542224	8.37942e-27		ENSG00000182087	-0.104364	0.0184588		ENSG00000177663	-0.325725	0.00042771
ENSG00000163291	-0.228385	8.22377e-20		ENSG00000182168	-0.159366	0.0076411		ENSG00000177675	0.681804	6.1258e-10
ENSG00000163328	0.237055	3.96047e-08		ENSG00000182197	-0.204802	0.0240198		ENSG00000177954	-0.320723	0.00557256
ENSG00000163406	-0.132773	0.000949357		ENSG00000182247	-0.352165	0.000229043		ENSG00000178104	0.177716	0.0103819
ENSG00000163491	-0.110242	0.0241669		ENSG00000182287	0.406107	1.67514e-13		ENSG00000178234	0.150088	0.0427598
ENSG00000163512	0.388888	6.29013e-30		ENSG00000182389	-0.434938	1.59525e-09		ENSG00000178425	0.197064	0.00246719
ENSG00000163513	-0.438667	4.60209e-17		ENSG00000182511	0.128556	0.00114109		ENSG00000178573	0.3946	0.000182698
ENSG00000163527	0.151491	0.00056202		ENSG00000182578	-0.565455	2.05311e-11		ENSG00000178695	-0.228842	0.00147371
ENSG00000163539	0.14689	0.00186914		ENSG00000182601	-1.45232	1.96829e-29		ENSG00000178764	0.251663	0.0017872
ENSG00000163563	-0.131679	2.07548e-06		ENSG00000182957	-0.535977	5.44621e-13		ENSG00000178904	-0.217874	1.35187e-09
ENSG00000163590	0.462054	8.36281e-19		ENSG00000182973	-0.110206	0.0204324		ENSG00000178927	-0.195445	2.62208e-05
ENSG00000163625	0.491066	5.30852e-14		ENSG00000183020	0.698114	1.44507e-20		ENSG00000178996	-0.19543	0.000375634
ENSG00000163644	-0.12815	1.44627e-05		ENSG00000183023	-0.72148	4.05947e-11		ENSG00000179051	-0.191091	0.00170946
ENSG00000163660	0.112831	0.00823584		ENSG00000183049	-0.562451	2.34314e-10		ENSG00000179094	0.13626	0.0133832
ENSG00000163694	0.926104	4.89634e-44		ENSG00000183066	-0.125404	0.000498702		ENSG00000179104	0.162781	0.0479924
ENSG00000163755	-0.189084	1.11888e-07		ENSG00000183091	-0.109407	0.00278623		ENSG00000179583	-0.351684	7.96999e-06
ENSG00000163932	-0.186831	1.19229e-10		ENSG00000183230	-0.285789	1.60727e-07		ENSG00000179715	-0.258966	0.0027323
ENSG00000164010	-0.13767	3.44776e-10		ENSG00000183255	-0.268093	6.35117e-10		ENSG00000179832	0.192626	0.00159192
ENSG00000164105	0.154602	1.02085e-07		ENSG00000183323	-0.171749	5.92086e-06		ENSG00000179833	-0.151239	0.0260564
ENSG00000164111	0.151971	3.05327e-06		ENSG00000183621	0.539155	1.36431e-13		ENSG00000180182	-0.118806	0.0464019
ENSG00000164124	0.102729	0.0040089		ENSG00000183765	-0.11667	0.00026153		ENSG00000180233	-0.328891	0.000530624
ENSG00000164136	0.241514	1.26149e-09		ENSG00000183955	-0.101917	0.00227546		ENSG00000180263	0.286253	2.93982e-07
ENSG00000164182	0.222582	7.05025e-07		ENSG00000184005	-1.85323	4.20311e-56		ENSG00000180354	-0.164264	0.017901
ENSG00000164190	0.18042	0.000586864		ENSG00000184060	0.22585	0.0112856		ENSG00000180611	0.211937	0.0185729
ENSG00000164253	0.161379	1.86923e-05		ENSG00000184076	-0.102856	0.011907		ENSG00000180628	0.233623	0.000383674
ENSG00000164292	0.422681	1.04843e-30		ENSG00000184083	-0.15247	4.20334e-07		ENSG00000180817	-0.266302	8.17093e-09
ENSG00000164300	0.77697	5.11729e-61		ENSG00000184156	-2.01186	2.97741e-68		ENSG00000180881	-0.132066	0.0178824
ENSG00000164329	0.302694	1.20232e-10		ENSG00000184305	0.190247	0.00740508		ENSG00000180891	0.172045	0.0251781
ENSG00000164463	0.113646	0.00951184		ENSG00000184574	-0.289562	8.25257e-12		ENSG00000180917	-0.111501	0.0230925
ENSG00000164535	-0.234088	9.89512e-19		ENSG00000184588	0.87982	4.96288e-11		ENSG00000181192	-0.191843	3.77387e-06
ENSG00000164543	-0.326152	3.77587e-47		ENSG00000184640	0.155676	0.00252837		ENSG00000181467	0.248133	2.65354e-07
ENSG00000164548	0.154679	0.000344306		ENSG00000184992	-0.192147	1.83619e-09		ENSG00000181481	0.263505	0.000121933
ENSG00000164574	-0.527546	1.66156e-33		ENSG00000185088	-0.101749	0.0331365		ENSG00000181631	-0.256778	1.18909e-10
ENSG00000164587	-0.105031	0.0291522		ENSG00000185158	0.12048	0.00610302		ENSG00000181690	-0.178333	0.00050209
ENSG00000164597	0.15697	0.00552671		ENSG00000185215	0.423462	9.66999e-15		ENSG00000181722	0.278805	0.0236999
ENSG00000164603	-0.131312	0.000234568		ENSG00000185432	-0.100936	0.00870628		ENSG00000181804	0.701445	2.23859e-09
ENSG00000164674	-0.179869	1.24777e-05		ENSG00000185515	-0.105121	0.00119508		ENSG00000181982	0.261574	0.000177819
ENSG00000164713	0.101354	0.00321546		ENSG00000185716	-0.121265	0.0291581		ENSG00000182022	0.546607	2.55398e-06
ENSG00000164733	0.362658	2.66213e-07		ENSG00000185811	-0.619482	2.0438e-13		ENSG00000182054	-0.139209	3.89617e-05
ENSG00000164808	0.749225	3.96446e-40		ENSG00000185950	0.360125	8.08215e-05		ENSG00000182196	-0.157608	0.00101646
ENSG00000164830	-1.33273	1.53305e-121		ENSG00000185989	-0.463605	1.86698e-18		ENSG00000182247	-0.5282	2.3749e-06
ENSG00000164924	0.128611	0.00321886		ENSG00000186047	-0.689392	9.47334e-28		ENSG00000182287	0.337977	5.38172e-09
ENSG00000165006	0.110455	0.00834091		ENSG00000186063	-0.345338	4.4541e-11		ENSG00000182389	-0.62389	6.566e-17
ENSG00000165025	-0.373311	5.11679e-12		ENSG00000186088	0.383606	8.52439e-07		ENSG00000182511	0.203543	3.7988e-05
ENSG00000165029	0.986257	6.42003e-57		ENSG00000186417	-1.08292	3.46156e-38		ENSG00000182578	-0.64122	1.00797e-14
ENSG00000165072	0.393063	6.01725e-26		ENSG00000186469	0.449323	8.83864e-10		ENSG00000182601	-1.37671	3.56817e-31
ENSG00000165097	-0.117115	0.000361281		ENSG00000186472	-0.232021	8.0649e-06		ENSG00000182899	-0.138824	0.0307157
ENSG00000165181	-0.213864	1.47704e-05		ENSG00000186815	0.321872	3.29181e-05		ENSG00000182957	-0.804833	1.66912e-23
ENSG00000165209	-0.497696	1.21853e-59		ENSG00000186818	-0.222456	3.83304e-09		ENSG00000182973	-0.108532	0.0158094
ENSG00000165322	-0.450211	2.92951e-19		ENSG00000187098	0.581148	3.0674e-12		ENSG00000183020	0.973289	1.27285e-27
ENSG00000165457	0.107022	1.01249e-05		ENSG00000187109	-0.258843	2.45979e-05		ENSG00000183023	-0.824628	2.61582e-10
ENSG00000165475	0.311129	1.0328e-19		ENSG00000187164	-0.574909	3.18105e-13		ENSG00000183049	-0.34019	0.00363668
ENSG00000165525	0.103894	0.00991248		ENSG00000187239	0.665339	1.20023e-18		ENSG00000183091	-0.101917	0.0336781
ENSG00000165675	0.157003	0.00126751		ENSG00000187474	0.249492	3.72875e-07		ENSG00000183230	-0.261245	3.97112e-08
ENSG00000165704	-0.128713	1.88147e-06		ENSG00000187554	-0.185525	0.00175394		ENSG00000183323	-0.1081	0.0188234
ENSG00000166002	-0.110338	0.000116417		ENSG00000187605	0.189559	0.0163522		ENSG00000183486	0.303798	0.000521981
ENSG00000166033	-0.60348	5.3851e-107		ENSG00000187672	-0.93501	5.22348e-28		ENSG00000183621	0.466277	2.50881e-07
ENSG00000166128	0.303249	2.01687e-10		ENSG00000187715	-0.643142	3.15122e-39		ENSG00000183765	-0.16712	1.3939e-09
ENSG00000166224	0.220754	9.73772e-10		ENSG00000187764	-0.431603	5.63004e-17		ENSG00000184005	-1.73327	4.91525e-44
ENSG00000166225	0.104063	0.0143306		ENSG00000188001	0.372988	0.000149975		ENSG00000184009	-0.14985	0.0281705
ENSG00000166233	0.170489	0.000165037		ENSG00000188033	-0.154507	4.96087e-07		ENSG00000184060	0.382461	1.75952e-05
ENSG00000166272	0.28634	1.32147e-11		ENSG00000188313	0.226491	0.0178916		ENSG00000184083	-0.117199	0.0053596
ENSG00000166323	-0.104309	4.48652e-08		ENSG00000188641	1.71724	1.08869e-44		ENSG00000184156	-1.96633	4.99965e-64
ENSG00000166340	0.119164	2.83871e-05		ENSG00000188677	0.306998	5.5936e-07		ENSG00000184305	0.285827	0.00273705
ENSG00000166377	0.1122	0.0290313		ENSG00000188921	-0.112545	0.00733426		ENSG00000184574	-0.22238	5.95178e-06
ENSG00000166387	0.177768	8.7085e-09		ENSG00000189067	0.336503	9.38017e-06		ENSG00000184575	-0.116904	0.00671497
ENSG00000166439	0.142906	0.000233117		ENSG00000196083	-0.399743	1.4122e-07		ENSG00000184588	1.3501	1.71134e-28
ENSG00000166441	-0.127783	0.0024565		ENSG00000196116	-0.138795	0.00230323		ENSG00000184640	0.161082	0.00503172
ENSG00000166503	-0.118024	5.87323e-06		ENSG00000196141	0.547251	1.67577e-11		ENSG00000184992	-0.123432	0.00238121
ENSG00000166532	0.390975	1.89296e-29		ENSG00000196218	-0.321315	9.09233e-05		ENSG00000185158	0.157111	0.00454901
ENSG00000166575	0.196433	5.2126e-07		ENSG00000196220	-0.394955	2.51128e-07		ENSG00000185215	0.463869	1.04438e-10
ENSG00000166598	0.220179	5.81619e-05		ENSG00000196284	-0.215681	0.0315573		ENSG00000185305	0.285878	0.00676859
ENSG00000166669	-0.414763	9.41341e-26		ENSG00000196352	0.24151	1.22734e-05		ENSG00000185811	-0.595925	1.59609e-09
ENSG00000166833	-0.185795	0.00224026		ENSG00000196369	-0.778429	6.93125e-14		ENSG00000185950	0.317223	0.00267154
ENSG00000166888	0.123904	0.00074347		ENSG00000196405	-0.545343	1.92699e-15		ENSG00000185989	-0.317653	9.15659e-07
ENSG00000166927	0.64925	1.1619e-24		ENSG00000196418	-0.246201	1.75772e-05		ENSG00000186047	-0.677951	5.72851e-16
ENSG00000166928	0.277839	1.80559e-13		ENSG00000196428	-0.184091	0.0131186		ENSG00000186063	-0.309903	3.11653e-06
ENSG00000166949	-0.268881	4.3839e-13		ENSG00000196482	-0.120866	0.00154587		ENSG00000186088	0.318195	0.000449669
ENSG00000166963	-0.105408	0.0184151		ENSG00000196498	-0.196765	0.0141267		ENSG00000186417	-1.01768	5.63752e-33
ENSG00000166979	0.198537	5.80325e-10		ENSG00000196531	-0.155839	0.0402156		ENSG00000186468	-0.255266	0.00026718
ENSG00000167081	0.173646	0.00614225		ENSG00000196535	-0.158168	6.82629e-05		ENSG00000186469	0.505664	9.98674e-10
ENSG00000167202	-0.107538	0.0378318		ENSG00000196586	-0.329823	1.53224e-34		ENSG00000186472	-0.123708	0.0317476
ENSG00000167216	0.139168	2.32337e-06		ENSG00000196605	-0.1518	0.0366323		ENSG00000186815	0.198098	0.0258283
ENSG00000167323	0.18306	8.11018e-05		ENSG00000196628	0.347221	0.00343113		ENSG00000186818	-0.208593	2.50831e-08
ENSG00000167491	0.155182	0.000286324		ENSG00000196664	-0.149711	0.000333552		ENSG00000187098	0.45464	1.17701e-05
ENSG00000167528	-0.124849	4.64891e-11		ENSG00000196705	-0.130299	0.026636		ENSG00000187109	-0.166868	0.0104018
ENSG00000167693	-0.329394	1.71807e-42		ENSG00000196715	-0.176241	0.000879721		ENSG00000187164	-0.521002	1.35187e-09
ENSG00000167851	-0.191461	2.2618e-12		ENSG00000196730	1.00788	5.63897e-48		ENSG00000187239	0.648012	1.83641e-12
ENSG00000167895	-0.143476	5.36587e-05		ENSG00000196776	0.205622	7.13658e-05		ENSG00000187240	0.149538	0.0181625
ENSG00000168016	-0.180012	4.39502e-08		ENSG00000196782	-0.669968	5.58776e-11		ENSG00000187474	0.253372	0.000107414
ENSG00000168036	0.192196	2.49086e-05		ENSG00000196843	-0.106426	0.0104054		ENSG00000187514	-0.170894	0.0303566
ENSG00000168172	0.103821	0.034647		ENSG00000196950	-0.209791	0.000632703		ENSG00000187605	0.284375	0.00415858
ENSG00000168209	-0.171666	1.8976e-06		ENSG00000196954	0.12997	0.0399107		ENSG00000187672	-0.943009	8.73977e-25
ENSG00000168214	1.16958	3.69602e-66		ENSG00000197081	0.185975	0.0183754		ENSG00000187715	-0.561916	2.81304e-36
ENSG00000168216	-0.165752	1.04555e-05		ENSG00000197119	-0.234999	1.28698e-11		ENSG00000187764	-0.519779	7.12361e-22
ENSG00000168297	0.204639	3.82773e-09		ENSG00000197157	0.361353	0.000316226		ENSG00000188001	0.249679	0.0407307
ENSG00000168329	-0.913858	2.34797e-134		ENSG00000197183	-0.35807	1.16129e-15		ENSG00000188033	-0.192848	7.58209e-11
ENSG00000168461	0.256637	0.000468555		ENSG00000197312	-0.133621	0.00497681		ENSG00000188312	0.35543	0.000723049
ENSG00000168615	0.13644	0.00983486		ENSG00000197323	-0.142008	0.0379079		ENSG00000188313	0.220362	0.0312234
ENSG00000168675	-0.26576	0.000118478		ENSG00000197405	0.431631	3.09982e-09		ENSG00000188612	-0.104128	0.0134448
ENSG00000168906	0.164831	2.16364e-05		ENSG00000197442	-0.301618	9.03131e-05		ENSG00000188641	1.64268	2.12369e-32
ENSG00000168918	-0.689364	2.65354e-35		ENSG00000197520	-0.340001	1.3399e-08		ENSG00000188677	0.211266	0.00457533
ENSG00000169045	0.132875	0.00276052		ENSG00000197535	1.08051	1.29729e-37		ENSG00000188846	-0.15426	0.0188229
ENSG00000169084	0.244847	1.015e-07		ENSG00000197548	0.871378	6.91032e-23		ENSG00000188921	-0.128107	0.00131902
ENSG00000169122	0.340486	1.26899e-10		ENSG00000197580	-0.23617	4.19008e-08		ENSG00000189043	-0.174875	0.0414846
ENSG00000169313	-1.21979	1.33437e-118		ENSG00000197601	0.223998	0.00255959		ENSG00000189067	0.380174	3.13673e-05
ENSG00000169372	-0.192337	7.49733e-05		ENSG00000197622	-0.230862	9.75165e-07		ENSG00000189403	-0.191765	0.00741286
ENSG00000169403	-0.229416	2.05494e-15		ENSG00000197712	-0.108725	0.0293646		ENSG00000196083	-0.458804	1.04741e-09
ENSG00000169499	0.153503	0.00242645		ENSG00000197746	0.276507	0.0167594		ENSG00000196141	0.553299	1.95341e-10
ENSG00000169508	0.317543	7.9432e-11		ENSG00000197779	-0.141193	5.34375e-05		ENSG00000196218	-0.209464	0.0324895
ENSG00000169554	0.601357	1.26964e-18		ENSG00000197892	0.167115	0.0237826		ENSG00000196220	-0.391772	1.59302e-06
ENSG00000169756	-0.387024	1.16019e-13		ENSG00000197943	-0.503418	2.22925e-05		ENSG00000196284	-0.250298	0.00513536
ENSG00000169826	0.240825	1.83364e-12		ENSG00000197959	-0.339346	9.13179e-09		ENSG00000196352	0.216072	0.00026718
ENSG00000169891	0.160648	1.78574e-06		ENSG00000197965	-0.552436	1.86688e-18		ENSG00000196357	-0.106322	0.010735
ENSG00000169896	-0.281129	4.46303e-13		ENSG00000197971	-0.219726	0.0220621		ENSG00000196369	-0.776433	7.45883e-26
ENSG00000169902	0.437134	3.18248e-25		ENSG00000198001	-0.123094	0.00442812		ENSG00000196405	-0.513327	4.70394e-13
ENSG00000169967	-0.123193	0.0141025		ENSG00000198108	-0.287684	0.00929695		ENSG00000196418	-0.244343	0.000204462
ENSG00000170017	-0.423292	7.69846e-15		ENSG00000198121	-0.340289	1.0587e-06		ENSG00000196482	-0.1232	0.0011514
ENSG00000170153	0.218753	0.00373867		ENSG00000198189	-0.140248	0.00346916		ENSG00000196531	-0.203161	0.00230175
ENSG00000170296	-0.102175	8.46318e-05		ENSG00000198223	-0.498939	1.60459e-09		ENSG00000196535	-0.124302	0.00959374
ENSG00000170345	0.317047	1.08475e-09		ENSG00000198246	-0.179138	7.79435e-07		ENSG00000196586	-0.291384	3.23277e-15
ENSG00000170390	-0.120407	1.77388e-11		ENSG00000198265	0.254026	0.00118779		ENSG00000196628	0.346341	0.00234824
ENSG00000170396	0.296066	1.72727e-07		ENSG00000198286	-0.623155	7.44823e-31		ENSG00000196663	-0.100529	0.0151299
ENSG00000170456	0.149726	1.2441e-05		ENSG00000198363	0.274631	0.000498702		ENSG00000196664	-0.222271	7.72009e-15
ENSG00000170525	-0.175791	0.0108038		ENSG00000198399	0.208625	0.00722881		ENSG00000196683	-0.136107	0.0213402
ENSG00000170542	-0.777037	1.56719e-77		ENSG00000198604	0.191287	0.0215298		ENSG00000196730	1.21518	3.50502e-45
ENSG00000170571	0.413044	1.0685e-21		ENSG00000198722	0.214631	4.4152e-05		ENSG00000196776	0.26363	5.13622e-05
ENSG00000170581	0.149719	3.76067e-07		ENSG00000198740	-0.25788	0.000575531		ENSG00000196782	-0.469379	5.57086e-05
ENSG00000170634	0.190966	0.000297201		ENSG00000198742	-0.444369	4.7112e-12		ENSG00000196792	0.223259	0.0102689
ENSG00000170638	-0.12452	1.0652e-07		ENSG00000198771	-0.352889	0.000102867		ENSG00000196911	-0.116022	0.0409306
ENSG00000170677	-0.814536	3.36993e-78		ENSG00000198833	-0.197659	1.76541e-06		ENSG00000196950	-0.269042	4.97317e-06
ENSG00000170776	0.324125	2.08799e-08		ENSG00000198846	0.11723	0.0195512		ENSG00000197119	-0.179263	5.29412e-08
ENSG00000170791	-0.116071	6.16758e-07		ENSG00000198873	-0.211631	0.000354704		ENSG00000197147	-0.17238	0.000958219
ENSG00000170802	0.147637	0.000503706		ENSG00000198879	-0.50586	3.5961e-05		ENSG00000197183	-0.215876	0.000259694
ENSG00000170832	0.202007	1.83689e-05		ENSG00000198947	0.278045	2.32561e-06		ENSG00000197405	0.370545	7.74611e-09
ENSG00000170836	0.12496	0.000253061		ENSG00000198964	0.606724	9.94508e-12		ENSG00000197442	-0.491939	2.36258e-08
ENSG00000170873	0.796307	1.29207e-26		ENSG00000203705	-0.101296	0.022314		ENSG00000197520	-0.628281	2.8831e-24
ENSG00000170921	-0.142503	0.030328		ENSG00000203747	-0.754472	2.07647e-39		ENSG00000197535	1.21581	6.70431e-42
ENSG00000171044	-0.121292	0.040114		ENSG00000204116	-0.118266	0.00666338		ENSG00000197548	0.98633	3.07376e-28
ENSG00000171100	0.185666	1.151e-07		ENSG00000204178	-0.142643	0.00235178		ENSG00000197580	-0.204701	2.25826e-06
ENSG00000171105	0.12783	0.00133985		ENSG00000204388	-0.231466	0.037071		ENSG00000197584	-0.143822	0.000534974
ENSG00000171115	0.132752	0.000229754		ENSG00000204389	-0.514329	0.000452214		ENSG00000197622	-0.226947	2.3749e-06
ENSG00000171132	0.333273	2.01707e-09		ENSG00000204406	-0.198979	0.0490575		ENSG00000197712	-0.148382	0.00351731
ENSG00000171189	-0.135148	5.74421e-07		ENSG00000204472	-0.269075	2.72166e-09		ENSG00000197728	-0.103723	0.020086
ENSG00000171291	-0.118027	2.70007e-10		ENSG00000204482	-0.272269	3.33648e-09		ENSG00000197779	-0.125019	0.0158705
ENSG00000171310	-0.876914	1.44884e-41		ENSG00000204577	0.135921	0.00145097		ENSG00000197852	-0.135847	0.00101488
ENSG00000171316	-0.459774	3.57295e-22		ENSG00000204592	-0.214073	0.00238262		ENSG00000197943	-0.406013	0.00860269
ENSG00000171488	-0.498344	1.47286e-28		ENSG00000204634	-0.28855	0.000315968		ENSG00000197958	-0.181922	0.00466157
ENSG00000171492	-0.242328	3.08753e-06		ENSG00000204767	-0.144046	4.50173e-05		ENSG00000197959	-0.334736	2.97197e-07
ENSG00000171530	0.136142	0.00202925		ENSG00000205269	0.134179	0.0253476		ENSG00000197965	-0.617417	4.08913e-24
ENSG00000171587	-1.00801	1.47007e-105		ENSG00000205336	-0.736116	3.60846e-34		ENSG00000198034	-0.239024	0.000228763
ENSG00000171603	-0.172623	3.52275e-08		ENSG00000205423	0.146672	0.00112584		ENSG00000198189	-0.161525	0.01111
ENSG00000171608	-0.141462	0.000497141		ENSG00000205542	-0.555732	4.4201e-07		ENSG00000198223	-0.44872	1.41931e-08
ENSG00000171643	-0.452755	1.06081e-59		ENSG00000205581	-0.142	0.00437386		ENSG00000198242	-0.199354	0.0107135
ENSG00000171659	-0.342258	1.33822e-21		ENSG00000205726	1.53326	3.77872e-64		ENSG00000198246	-0.152466	1.01345e-05
ENSG00000171681	0.11763	0.047942		ENSG00000206199	-0.152311	0.0271453		ENSG00000198265	0.26703	0.00686632
ENSG00000171700	-0.16555	1.905e-14		ENSG00000206418	-0.23754	3.79691e-06		ENSG00000198286	-0.587392	8.81524e-26
ENSG00000171729	-0.146333	0.000216012		ENSG00000211456	-0.162673	0.000745759		ENSG00000198363	0.408853	1.67852e-06
ENSG00000171766	-0.130094	2.45263e-06		ENSG00000213047	0.314148	3.83579e-07		ENSG00000198399	0.199396	0.0276487
ENSG00000171791	-0.361649	3.25378e-09		ENSG00000213064	-0.123422	0.0170201		ENSG00000198604	0.255142	0.00117547
ENSG00000171862	0.170928	0.00335635		ENSG00000213585	-0.171337	5.97616e-05		ENSG00000198722	0.255365	4.40524e-06
ENSG00000171914	-1.17374	1.05992e-216		ENSG00000213639	0.256663	0.000398942		ENSG00000198740	-0.261087	0.00030612
ENSG00000171940	0.15972	2.66899e-06		ENSG00000214113	-0.182561	0.00331756		ENSG00000198742	-0.330979	4.63609e-05
ENSG00000171943	-0.635599	2.71024e-44		ENSG00000214226	-0.102481	0.0032194		ENSG00000198755	-0.144819	0.0107618
ENSG00000171984	-0.168369	2.33313e-10		ENSG00000214787	0.899891	1.96829e-29		ENSG00000198771	-0.261301	0.0175467
ENSG00000171988	0.259776	3.43984e-06		ENSG00000216937	-0.175124	0.0109807		ENSG00000198833	-0.197075	4.24263e-06
ENSG00000172086	-0.137364	2.29888e-05		ENSG00000221869	0.255133	0.00383129		ENSG00000198873	-0.155068	0.0322761
ENSG00000172159	0.152375	0.000215441		ENSG00000225830	-0.270837	2.68753e-11		ENSG00000198879	-0.508697	0.000660517
ENSG00000172216	-0.196126	1.73659e-06		ENSG00000226124	-0.143278	0.0185617		ENSG00000198909	0.20171	0.029022
ENSG00000172243	0.246816	1.69941e-07		ENSG00000231887	0.111643	0.0354952		ENSG00000198947	0.25342	0.00037331
ENSG00000172292	0.424386	6.22015e-16		ENSG00000232112	-0.137159	0.0049651		ENSG00000198964	0.580967	4.12725e-09
ENSG00000172493	0.404896	5.41419e-12		ENSG00000234745	-0.173443	0.0383791		ENSG00000203747	-0.740853	3.79996e-42
ENSG00000172578	0.112173	0.0124197		ENSG00000236287	-0.140362	0.000189824		ENSG00000204103	0.238749	0.00130464
ENSG00000172661	0.117062	5.56533e-08		ENSG00000248905	1.25132	5.05788e-23		ENSG00000204256	-0.120013	0.0164523
ENSG00000172667	-0.734982	2.0606e-85		ENSG00000250312	-0.201007	6.18944e-05		ENSG00000204287	-0.409671	1.96002e-08
ENSG00000172716	0.138008	8.98882e-07		ENSG00000254087	-0.334384	0.000581579		ENSG00000204388	-0.236301	0.0307696
ENSG00000172757	-0.186316	3.00382e-07		ENSG00000256235	0.149592	8.99418e-05		ENSG00000204389	-0.419671	0.00546632
ENSG00000172765	0.334871	7.66232e-09		ENSG00000256771	-0.104845	4.43241e-06		ENSG00000204472	-0.265386	1.91118e-08
ENSG00000172809	-0.139098	0.00346954		ENSG00000257093	-0.17285	0.00619212		ENSG00000204482	-0.294898	5.80878e-10
ENSG00000172845	0.100597	0.0340549		ENSG00000260314	2.09177	1.36752e-65		ENSG00000204525	-0.122731	0.017737
ENSG00000172869	0.469295	1.21163e-26		ENSG00000263001	-0.296237	5.7188e-05		ENSG00000204569	-0.124611	0.0350081
ENSG00000172985	-0.680579	1.71436e-19		ENSG00000265972	0.502015	2.95982e-08		ENSG00000204577	0.129578	0.00606196
ENSG00000173163	0.110201	0.0472612		ENSG00000266028	-0.882004	4.22413e-12		ENSG00000204592	-0.297264	2.31988e-07
ENSG00000173166	0.305348	2.89403e-10		ENSG00000270629	0.115823	0.0137381		ENSG00000204634	-0.32673	0.00046416
ENSG00000173193	0.239383	1.17878e-06		ENSG00000271605	-0.141799	0.00101549		ENSG00000204767	-0.177217	0.000911674
ENSG00000173221	-0.116183	5.05391e-05		ENSG00000272325	-0.204327	8.00872e-06		ENSG00000204842	0.183688	0.0284014
ENSG00000173369	-0.264068	9.77608e-06		ENSG00000273749	-0.933718	3.58188e-20		ENSG00000204977	-0.221971	6.06928e-07
ENSG00000173406	-0.108116	0.0123735		ENSG00000275342	-0.149821	4.11715e-05		ENSG00000205269	0.239861	6.12659e-05
ENSG00000173418	-0.172893	3.52543e-14		ENSG00000275395	-0.48321	0.000221179		ENSG00000205302	0.354168	2.31212e-05
ENSG00000173436	-0.421991	1.14245e-31		ENSG00000277443	-0.278637	0.000155449		ENSG00000205336	-0.732255	2.61581e-26
ENSG00000173482	0.514584	1.0901e-22		ENSG00000279170	-0.101191	0.00217347		ENSG00000205542	-0.676463	5.34588e-11
ENSG00000173517	1.20196	6.46204e-94						ENSG00000205581	-0.187459	0.000149623
ENSG00000173530	-0.208609	4.94803e-09						ENSG00000205726	1.57581	5.08239e-71
ENSG00000173542	-0.253076	4.84536e-09						ENSG00000205730	-0.144443	0.0020887
ENSG00000173692	0.108564	0.0106801						ENSG00000206418	-0.169159	0.00911093
ENSG00000173706	-0.154344	3.12243e-16						ENSG00000206503	-0.163007	0.00219493
ENSG00000173744	1.5567	3.23147e-111						ENSG00000211455	-0.199721	0.00288927
ENSG00000173812	-0.117269	0.00388304						ENSG00000213047	0.263294	0.000101804
ENSG00000173821	0.202035	0.000529488						ENSG00000213445	-0.121388	0.00168088
ENSG00000173905	0.208179	3.64848e-09						ENSG00000213585	-0.136518	0.00536635
ENSG00000173950	-0.154325	4.78593e-10						ENSG00000213676	-0.137899	5.13977e-05
ENSG00000174125	-0.2743	1.54451e-11						ENSG00000214226	-0.140992	0.000316085
ENSG00000174437	0.112053	0.0272552						ENSG00000214787	0.669644	1.00797e-14
ENSG00000174456	-0.13479	8.19227e-17						ENSG00000215301	0.150656	0.0474297
ENSG00000174473	0.892866	4.42383e-31						ENSG00000217128	0.283977	0.0173969
ENSG00000174485	-0.153232	0.00454574						ENSG00000217555	-0.124789	0.045501
ENSG00000174705	0.470914	2.03374e-16						ENSG00000219200	-0.117269	0.0320053
ENSG00000174718	0.159372	0.00560817						ENSG00000221823	0.263301	0.0432849
ENSG00000174748	-0.124844	0.00206708						ENSG00000221983	-0.197443	0.000801293
ENSG00000174891	0.116579	0.0428556						ENSG00000224877	-0.114511	0.000341598
ENSG00000175155	0.131347	0.00163854						ENSG00000225830	-0.16808	0.000279361
ENSG00000175161	-0.122874	0.0432349						ENSG00000229117	-0.245308	0.0211822
ENSG00000175265	-0.120115	2.93174e-08						ENSG00000231389	-0.255057	4.62745e-06
ENSG00000175354	-0.21248	0.00163455						ENSG00000231500	-0.258584	0.00423467
ENSG00000175455	0.142305	3.07278e-05						ENSG00000231887	0.325663	9.86922e-07
ENSG00000175471	1.28081	1.55863e-124						ENSG00000232112	-0.129294	0.0257687
ENSG00000175893	-0.129652	0.00536796						ENSG00000234745	-0.238107	3.26156e-05
ENSG00000175899	-0.67522	1.94521e-44						ENSG00000236287	-0.171861	8.20757e-05
ENSG00000175931	-0.185143	1.85569e-10						ENSG00000241343	-0.153341	0.0356817
ENSG00000176142	0.174966	2.26759e-08						ENSG00000248905	1.43146	1.34772e-24
ENSG00000176204	-0.11184	0.0284575						ENSG00000250312	-0.157126	0.00818141
ENSG00000176225	-0.723838	8.8156e-72						ENSG00000250479	-0.126064	0.0144648
ENSG00000176390	-0.114788	0.00115771						ENSG00000254087	-0.454427	6.72119e-05
ENSG00000176407	0.101873	0.0123735						ENSG00000254999	-0.162571	8.77736e-07
ENSG00000176533	-0.533907	4.72877e-39						ENSG00000256235	0.114619	0.0169068
ENSG00000176597	-0.530249	8.34772e-48						ENSG00000260314	2.38893	4.73738e-90
ENSG00000176658	0.388601	1.28815e-23						ENSG00000263001	-0.25424	0.000126667
ENSG00000176783	0.143088	1.67894e-05						ENSG00000265972	0.711252	1.37921e-11
ENSG00000176788	-0.237081	1.91355e-06						ENSG00000266028	-0.923319	2.08918e-22
ENSG00000176853	0.273312	2.45921e-16						ENSG00000266094	-0.105067	0.00681535
ENSG00000176974	0.283242	1.31485e-17						ENSG00000270629	0.116365	0.00791479
ENSG00000177119	0.159571	0.000466571						ENSG00000271605	-0.111771	0.0322761
ENSG00000177189	-0.406687	5.62687e-16						ENSG00000272325	-0.204509	0.000106233
ENSG00000177200	-0.393116	1.80608e-14						ENSG00000273749	-0.91703	3.52364e-24
ENSG00000177548	-0.108559	3.79926e-10						ENSG00000275023	-0.15185	0.00594359
ENSG00000177570	-0.410155	6.39093e-23						ENSG00000275395	-0.672717	1.45617e-05
ENSG00000177575	2.28449	6.75507e-174						ENSG00000277443	-0.415852	1.29391e-14
ENSG00000177600	-0.154459	0.00117045						ENSG00000282608	-0.111864	0.00859646
ENSG00000177606	0.137519	0.000420695
ENSG00000177663	-0.346512	6.79662e-13
ENSG00000177675	0.799561	1.01127e-35
ENSG00000177694	-0.147993	0.0232229
ENSG00000177885	-0.16625	0.00796495
ENSG00000177954	-0.217513	0.000273189
ENSG00000178104	0.155468	2.69695e-05
ENSG00000178177	0.251314	6.69812e-08
ENSG00000178234	0.136049	0.00176187
ENSG00000178425	0.249552	1.63295e-10
ENSG00000178573	0.42737	3.21312e-12
ENSG00000178607	0.130521	2.72461e-07
ENSG00000178695	-0.202016	8.03942e-06
ENSG00000178764	0.305023	1.37924e-10
ENSG00000178904	-0.201956	3.57295e-22
ENSG00000178927	-0.107982	5.5358e-05
ENSG00000178974	0.229508	2.74666e-07
ENSG00000178996	-0.10066	0.00154774
ENSG00000179051	-0.13881	7.53462e-06
ENSG00000179094	0.128547	6.30729e-06
ENSG00000179583	-0.201216	8.90798e-05
ENSG00000179715	-0.120468	0.0136853
ENSG00000179832	0.205483	3.0157e-10
ENSG00000179912	-0.108967	0.0415991
ENSG00000179915	-0.115012	0.0464909
ENSG00000179981	0.111775	0.000288922
ENSG00000180233	-0.351523	3.8122e-15
ENSG00000180263	0.295021	4.26494e-24
ENSG00000180353	0.174636	0.00401245
ENSG00000180354	-0.134749	0.000274323
ENSG00000180370	0.174477	5.60221e-05
ENSG00000180530	-0.167162	0.0106425
ENSG00000180611	0.136858	0.00323976
ENSG00000180628	0.3123	5.91716e-17
ENSG00000180773	0.119028	0.00073318
ENSG00000180817	-0.237174	8.79565e-20
ENSG00000180881	-0.114755	3.25973e-05
ENSG00000180891	0.193439	5.61737e-08
ENSG00000181192	-0.139102	2.98956e-08
ENSG00000181381	0.107458	0.0259941
ENSG00000181467	0.31456	1.59051e-29
ENSG00000181481	0.117235	0.000178758
ENSG00000181631	-0.184189	4.41743e-16
ENSG00000181690	-0.225817	1.55526e-15
ENSG00000181722	0.147379	0.0393731
ENSG00000181804	0.549487	7.36141e-20
ENSG00000181826	0.132649	2.42734e-05
ENSG00000181982	0.305291	2.23834e-16
ENSG00000182022	0.521098	1.19505e-17
ENSG00000182095	-0.123217	0.0314998
ENSG00000182247	-0.403603	7.70645e-12
ENSG00000182287	0.425669	5.45171e-33
ENSG00000182389	-0.549401	2.80552e-40
ENSG00000182511	0.176587	1.7543e-14
ENSG00000182541	-0.118097	0.0361446
ENSG00000182578	-0.510766	1.21508e-23
ENSG00000182601	-1.41842	6.92939e-100
ENSG00000182606	-0.135615	0.00467424
ENSG00000182670	0.200455	2.93423e-06
ENSG00000182923	-0.112953	0.000361043
ENSG00000182957	-0.866111	8.41519e-77
ENSG00000183020	0.763671	1.2776e-48
ENSG00000183023	-0.645863	6.39093e-23
ENSG00000183049	-0.314476	5.18238e-08
ENSG00000183091	-0.123937	7.9993e-13
ENSG00000183230	-0.24272	4.79928e-22
ENSG00000183255	-0.164024	1.2624e-08
ENSG00000183323	-0.125574	1.2358e-06
ENSG00000183486	0.243228	4.6332e-10
ENSG00000183621	0.545636	4.2734e-27
ENSG00000183765	-0.113421	6.73624e-11
ENSG00000184005	-1.79711	3.39108e-141
ENSG00000184060	0.256221	7.29281e-08
ENSG00000184156	-1.87129	9.73181e-166
ENSG00000184178	-0.155457	0.0218001
ENSG00000184182	-0.130483	0.000425393
ENSG00000184226	-0.138439	0.0269011
ENSG00000184305	0.138783	0.0012374
ENSG00000184384	-0.18039	0.0142409
ENSG00000184574	-0.255191	6.44101e-23
ENSG00000184588	1.32769	8.20092e-63
ENSG00000184640	0.190035	6.52419e-10
ENSG00000184992	-0.109337	2.47397e-07
ENSG00000185088	-0.106166	2.25102e-05
ENSG00000185158	0.148599	2.47641e-07
ENSG00000185215	0.363931	5.59598e-27
ENSG00000185305	0.198226	0.0030258
ENSG00000185345	-0.138317	0.0470062
ENSG00000185420	-0.163159	0.0259495
ENSG00000185477	-0.254627	6.91481e-08
ENSG00000185650	-0.150493	0.0276482
ENSG00000185811	-0.583011	1.02743e-27
ENSG00000185896	0.141525	1.05879e-05
ENSG00000185950	0.405736	9.23705e-14
ENSG00000185989	-0.372288	2.80092e-28
ENSG00000186047	-0.665828	4.68461e-50
ENSG00000186063	-0.340419	8.07943e-20
ENSG00000186088	0.283833	2.11352e-09
ENSG00000186094	-0.109404	0.00022475
ENSG00000186417	-1.16114	1.90366e-121
ENSG00000186468	-0.177401	7.57472e-05
ENSG00000186469	0.492239	1.53598e-23
ENSG00000186472	-0.213509	2.38176e-14
ENSG00000186815	0.247236	3.01703e-09
ENSG00000186818	-0.237023	8.72421e-37
ENSG00000187098	0.409962	1.28908e-12
ENSG00000187109	-0.201465	3.1208e-09
ENSG00000187164	-0.596189	3.28553e-34
ENSG00000187239	0.690594	5.80489e-43
ENSG00000187474	0.275581	2.52476e-16
ENSG00000187514	-0.110232	0.0195973
ENSG00000187554	-0.152001	0.000149235
ENSG00000187605	0.286362	5.14874e-08
ENSG00000187672	-0.96053	2.43653e-95
ENSG00000187715	-0.595159	1.03873e-96
ENSG00000187764	-0.38889	1.53351e-29
ENSG00000188001	0.301721	2.29696e-06
ENSG00000188033	-0.145832	7.64905e-17
ENSG00000188312	0.149534	0.0203151
ENSG00000188313	0.175313	0.00275168
ENSG00000188342	0.150891	0.00030534
ENSG00000188641	1.45277	6.77641e-74
ENSG00000188677	0.378499	2.65172e-22
ENSG00000188906	0.21552	0.000270295
ENSG00000188921	-0.102512	3.08618e-05
ENSG00000189067	0.353707	6.86258e-15
ENSG00000196083	-0.433297	7.20285e-18
ENSG00000196126	-0.132859	0.012736
ENSG00000196141	0.471415	6.41096e-20
ENSG00000196218	-0.251949	5.08968e-07
ENSG00000196220	-0.45849	1.20117e-24
ENSG00000196230	-0.116268	4.32595e-06
ENSG00000196284	-0.162664	0.00759327
ENSG00000196352	0.289394	2.79981e-15
ENSG00000196369	-0.755794	2.60616e-50
ENSG00000196405	-0.521528	1.17746e-44
ENSG00000196418	-0.265891	7.44751e-15
ENSG00000196498	-0.143138	0.00321185
ENSG00000196531	-0.167786	1.10223e-06
ENSG00000196535	-0.180525	1.39207e-16
ENSG00000196576	-0.103473	0.000231152
ENSG00000196586	-0.282913	2.65468e-43
ENSG00000196605	-0.141909	0.000885911
ENSG00000196628	0.27907	8.85563e-05
ENSG00000196664	-0.188397	2.60754e-17
ENSG00000196730	1.05031	2.87605e-97
ENSG00000196776	0.132792	9.77491e-05
ENSG00000196782	-0.570544	2.33628e-20
ENSG00000196792	0.106018	0.042291
ENSG00000196843	-0.125051	3.27568e-08
ENSG00000196935	0.175174	0.0258136
ENSG00000196950	-0.23245	2.22199e-11
ENSG00000196954	0.151002	1.88434e-05
ENSG00000197006	-0.116082	0.000205637
ENSG00000197081	0.245264	3.23442e-07
ENSG00000197102	0.11251	0.00590852
ENSG00000197119	-0.191563	3.41577e-26
ENSG00000197157	0.343184	1.59946e-08
ENSG00000197183	-0.237807	2.67553e-14
ENSG00000197381	0.101774	0.00165285
ENSG00000197386	0.143133	0.000447158
ENSG00000197405	0.406208	2.20951e-22
ENSG00000197442	-0.375494	1.48119e-12
ENSG00000197520	-0.422252	1.53308e-28
ENSG00000197535	1.06568	4.66788e-85
ENSG00000197548	0.811452	7.02432e-41
ENSG00000197555	0.199653	0.0192507
ENSG00000197580	-0.261222	9.29836e-32
ENSG00000197584	-0.149188	1.28908e-12
ENSG00000197601	0.216455	1.68817e-06
ENSG00000197622	-0.144854	2.03426e-06
ENSG00000197712	-0.15065	5.6677e-08
ENSG00000197746	0.189116	0.000753794
ENSG00000197756	-0.162566	0.00820205
ENSG00000197779	-0.103718	5.51128e-05
ENSG00000197852	-0.147134	7.03354e-14
ENSG00000197872	0.181201	0.00526649
ENSG00000197892	0.242348	4.72702e-08
ENSG00000197943	-0.324946	0.00197459
ENSG00000197958	-0.111574	0.000884777
ENSG00000197959	-0.305355	1.92138e-18
ENSG00000197965	-0.594957	3.59681e-53
ENSG00000197971	-0.190307	0.000335998
ENSG00000198108	-0.347098	2.93174e-08
ENSG00000198121	-0.199717	8.12274e-06
ENSG00000198189	-0.137271	2.80394e-07
ENSG00000198223	-0.352106	1.92736e-16
ENSG00000198242	-0.17379	3.68858e-05
ENSG00000198246	-0.166527	1.64694e-15
ENSG00000198265	0.333195	2.52753e-12
ENSG00000198286	-0.649166	7.70509e-83
ENSG00000198363	0.36403	4.93335e-14
ENSG00000198380	0.128747	6.56494e-05
ENSG00000198382	-0.124783	0.0325226
ENSG00000198399	0.103834	0.0493834
ENSG00000198604	0.260609	1.08989e-09
ENSG00000198668	-0.210229	0.00187096
ENSG00000198722	0.254167	2.27629e-14
ENSG00000198740	-0.308013	1.26817e-13
ENSG00000198742	-0.232896	2.60937e-08
ENSG00000198743	0.234712	3.64871e-09
ENSG00000198755	-0.125727	5.08427e-06
ENSG00000198771	-0.14728	0.012065
ENSG00000198814	0.115333	0.0385944
ENSG00000198825	-0.108204	0.000927984
ENSG00000198833	-0.182951	6.91764e-14
ENSG00000198846	0.165651	6.56833e-07
ENSG00000198873	-0.133717	0.000513105
ENSG00000198879	-0.618934	7.11889e-17
ENSG00000198900	0.115041	0.00893445
ENSG00000198909	0.1405	0.00108231
ENSG00000198911	0.141086	0.0014375
ENSG00000198947	0.261527	7.93385e-12
ENSG00000198964	0.574041	3.8146e-23
ENSG00000203747	-0.685697	4.72357e-88
ENSG00000204103	0.298725	9.10971e-14
ENSG00000204287	-0.245924	4.47428e-06
ENSG00000204388	-0.127151	0.0155158
ENSG00000204389	-0.33599	2.33829e-05
ENSG00000204472	-0.261664	7.76402e-30
ENSG00000204482	-0.21554	1.6567e-17
ENSG00000204577	0.137888	6.12437e-09
ENSG00000204592	-0.167981	1.92286e-05
ENSG00000204634	-0.323522	3.10555e-11
ENSG00000204767	-0.137315	4.548e-08
ENSG00000204842	0.193066	3.48122e-05
ENSG00000204977	-0.171291	5.12245e-12
ENSG00000205269	0.191465	1.36535e-08
ENSG00000205302	0.188642	3.26848e-05
ENSG00000205336	-0.742458	6.3718e-80
ENSG00000205423	0.149313	2.11985e-09
ENSG00000205542	-0.515674	9.59287e-17
ENSG00000205726	1.45279	1.92934e-127
ENSG00000205730	-0.113201	0.000230467
ENSG00000206199	-0.140631	0.00165454
ENSG00000206418	-0.197903	1.76362e-10
ENSG00000211455	-0.146761	0.000148927
ENSG00000213047	0.305029	4.80485e-14
ENSG00000213445	-0.120019	7.80506e-10
ENSG00000213585	-0.103311	4.31918e-05
ENSG00000213614	0.156929	0.000937294
ENSG00000213639	0.160697	0.000400716
ENSG00000214226	-0.103119	2.60744e-05
ENSG00000214787	0.782143	4.07222e-54
ENSG00000214954	-0.107935	0.000444063
ENSG00000215114	0.158337	0.00144093
ENSG00000215301	0.120827	0.00414153
ENSG00000215421	0.154375	0.0167231
ENSG00000216937	-0.191269	5.94291e-06
ENSG00000217128	0.345744	9.02776e-08
ENSG00000217555	-0.100554	0.0253595
ENSG00000221823	0.339339	4.41884e-07
ENSG00000221869	0.189298	0.000420695
ENSG00000225830	-0.184823	2.42225e-14
ENSG00000227124	-0.127408	1.04517e-08
ENSG00000229117	-0.178702	0.00143542
ENSG00000230124	0.158462	0.00196778
ENSG00000231389	-0.148722	4.98476e-05
ENSG00000231500	-0.109253	0.0457117
ENSG00000231887	0.316217	2.6421e-15
ENSG00000236287	-0.165525	6.32013e-12
ENSG00000241343	-0.148806	8.08239e-05
ENSG00000241973	0.152011	0.000225411
ENSG00000243716	0.132195	5.2868e-05
ENSG00000243927	0.155445	6.60634e-05
ENSG00000244405	-0.138605	0.00159457
ENSG00000244754	0.166882	0.000445536
ENSG00000248905	1.27589	1.5403e-56
ENSG00000250312	-0.185463	2.6545e-08
ENSG00000254087	-0.274177	1.75723e-06
ENSG00000254999	-0.105882	7.39615e-07
ENSG00000257093	-0.154515	2.85857e-05
ENSG00000260314	2.29847	8.39375e-208
ENSG00000260916	0.139669	2.97451e-06
ENSG00000261371	0.122237	0.00109077
ENSG00000263001	-0.167409	2.40726e-05
ENSG00000265972	0.660966	1.13949e-29
ENSG00000266028	-0.868969	1.34121e-49
ENSG00000270629	0.156835	9.39787e-12
ENSG00000271605	-0.164251	4.42029e-11
ENSG00000272325	-0.214594	5.67896e-15
ENSG00000273749	-0.917439	1.18362e-69
ENSG00000275342	-0.128574	2.51841e-08
ENSG00000275395	-0.501498	3.13859e-09
ENSG00000277443	-0.306689	7.59919e-19
ENSG00000277586	-0.113361	0.00310121
ENSG00000282608	-0.104079	1.6679e-05
ENSG00000288701	-0.139781	0.00153709

## Sheet: MHC vs HM
AD group				Normal group				PART group				Resilience group
ENSEMBL ID	log2FC	FDR		ENSEMBL ID	log2FC	FDR		ENSEMBL ID	log2FC	FDR		ENSEMBL ID	log2FC	FDR
ENSG00000000938	0.103108	1.69164e-06		ENSG00000002549	-0.166033	0.038321		ENSG00000002549	-0.188373	0.0217864		ENSG00000001631	-0.15313	0.0213491
ENSG00000001084	0.15133	1.07886e-10		ENSG00000003402	0.206622	0.00948893		ENSG00000003400	0.120758	0.024742		ENSG00000002549	-0.233227	0.0145682
ENSG00000002549	-0.182462	1.89732e-07		ENSG00000004399	0.125645	0.0469163		ENSG00000003402	0.230151	0.0122732		ENSG00000003402	0.248689	0.0210596
ENSG00000003400	0.104976	7.26069e-06		ENSG00000005844	-0.133942	0.00856316		ENSG00000004399	0.174734	0.0102913		ENSG00000005844	-0.230077	3.27652e-05
ENSG00000003402	0.231784	6.80521e-10		ENSG00000008083	0.260213	0.00151774		ENSG00000005339	0.157677	0.0411416		ENSG00000008083	0.277343	0.00405576
ENSG00000004399	0.181314	2.49455e-10		ENSG00000009950	-0.201671	0.00245103		ENSG00000005483	0.199096	0.0145224		ENSG00000008513	0.214225	0.0353181
ENSG00000005020	-0.142452	0.00781217		ENSG00000010327	-0.248338	0.00338621		ENSG00000005844	-0.149792	0.0143119		ENSG00000010404	-0.346026	0.0429018
ENSG00000005700	-0.102812	0.00140742		ENSG00000010404	-0.270093	0.00666155		ENSG00000008513	0.247727	0.00192535		ENSG00000013561	-0.108495	0.00510386
ENSG00000005844	-0.112231	3.70582e-06		ENSG00000023171	0.251489	0.00233089		ENSG00000009413	0.205479	0.0149462		ENSG00000018625	-0.144521	0.0160516
ENSG00000006062	0.110902	0.000540999		ENSG00000028137	0.295907	0.0100811		ENSG00000010327	-0.248832	0.00632879		ENSG00000025796	-0.206667	0.00687352
ENSG00000006704	0.139892	2.58792e-09		ENSG00000030419	-0.272901	1.65848e-05		ENSG00000011422	0.179856	0.00486511		ENSG00000028137	0.383722	0.00580614
ENSG00000006747	-0.160404	0.00458297		ENSG00000034053	-0.156013	3.09274e-05		ENSG00000012779	-0.234536	0.0276438		ENSG00000033122	-0.18355	0.0056429
ENSG00000007129	-0.11096	1.16196e-09		ENSG00000038945	0.640419	2.80746e-08		ENSG00000018236	-0.143369	0.0149462		ENSG00000034053	-0.119682	0.0382885
ENSG00000008083	0.267126	1.68387e-11		ENSG00000043462	-0.213656	0.0220862		ENSG00000020577	0.372769	3.74609e-05		ENSG00000038945	0.464954	0.0421725
ENSG00000008294	0.112484	0.00109219		ENSG00000044574	-0.222295	0.0132168		ENSG00000027075	0.310981	0.000370416		ENSG00000044574	-0.251801	0.0286755
ENSG00000008513	0.227489	4.95335e-10		ENSG00000046653	-0.137144	0.0233455		ENSG00000028137	0.456899	0.000103457		ENSG00000048052	-0.457568	0.00289703
ENSG00000009413	0.235853	1.84632e-10		ENSG00000047648	0.248856	0.0176698		ENSG00000030419	-0.238621	0.000464555		ENSG00000048540	-0.143465	0.0121062
ENSG00000009950	-0.237531	1.13631e-15		ENSG00000047932	-0.108964	0.0298697		ENSG00000035862	0.163406	0.0180462		ENSG00000048740	0.399202	0.000389314
ENSG00000010327	-0.159552	0.00010606		ENSG00000048052	-0.476811	5.08405e-05		ENSG00000038945	0.641769	2.04447e-08		ENSG00000055044	-0.14353	0.0265005
ENSG00000010404	-0.1789	0.000895921		ENSG00000048740	0.314385	0.000369377		ENSG00000043462	-0.242438	0.0106986		ENSG00000055163	-0.161237	0.00116221
ENSG00000011258	0.111541	0.00186862		ENSG00000049860	0.102772	0.0298697		ENSG00000044574	-0.310024	2.90738e-05		ENSG00000057657	0.175564	0.0180304
ENSG00000011422	0.223319	9.37378e-16		ENSG00000051108	0.198094	0.0180413		ENSG00000047648	0.23178	0.0339539		ENSG00000061676	-0.125473	0.0421924
ENSG00000011566	0.204084	1.65905e-08		ENSG00000055130	-0.22683	0.00948893		ENSG00000048052	-0.374644	0.00587403		ENSG00000062716	0.267436	0.0472298
ENSG00000018236	-0.117927	1.89881e-05		ENSG00000057657	0.155299	0.0111892		ENSG00000048740	0.483707	2.2017e-09		ENSG00000065357	-0.107522	0.00430802
ENSG00000018280	0.353651	4.56863e-07		ENSG00000059377	0.195918	0.0237888		ENSG00000054965	-0.249859	0.0118071		ENSG00000065548	-0.11498	0.0399547
ENSG00000019485	-0.121572	8.02758e-05		ENSG00000059588	-0.113476	0.0137782		ENSG00000055130	-0.186137	0.0404537		ENSG00000065609	-0.135555	0.0180304
ENSG00000019991	0.109857	7.51838e-08		ENSG00000062716	0.224873	0.0223895		ENSG00000057608	-0.173776	0.00440273		ENSG00000066651	-0.172624	0.00324505
ENSG00000020577	0.281909	3.67668e-09		ENSG00000064763	-0.229914	0.0382514		ENSG00000057657	0.214438	0.00095702		ENSG00000067057	-0.130547	0.0277728
ENSG00000021645	-0.201841	2.00963e-06		ENSG00000065548	-0.102094	0.02943		ENSG00000057704	0.192183	0.00849797		ENSG00000067248	-0.141605	0.0285244
ENSG00000023171	0.271665	1.65415e-13		ENSG00000067113	-0.167423	0.00780056		ENSG00000058091	0.143178	0.0207393		ENSG00000067533	-0.104248	0.0118713
ENSG00000026297	-0.220831	0.0295235		ENSG00000067798	-0.689893	1.32601e-08		ENSG00000059377	0.231129	0.0326685		ENSG00000067798	-0.718083	1.05482e-05
ENSG00000027075	0.198936	3.07616e-05		ENSG00000069849	0.261934	0.0014265		ENSG00000065413	0.250244	0.0327759		ENSG00000070808	-0.288425	0.00210798
ENSG00000028137	0.434861	1.37083e-16		ENSG00000070540	0.123719	0.0471824		ENSG00000065989	0.130882	0.017782		ENSG00000071051	-0.571555	0.00105978
ENSG00000028277	-0.192204	1.74984e-05		ENSG00000070785	-0.13853	0.0473783		ENSG00000066427	0.145724	0.0167906		ENSG00000073910	-0.104342	0.0331924
ENSG00000030419	-0.22905	1.75419e-10		ENSG00000070808	-0.155081	0.00948893		ENSG00000067715	-0.277741	0.0357525		ENSG00000074706	-0.776611	6.15025e-06
ENSG00000030582	0.109595	4.5604e-05		ENSG00000070882	0.222888	0.0245772		ENSG00000067798	-0.577933	1.39136e-07		ENSG00000074800	-0.190928	0.00687352
ENSG00000031081	-0.111337	0.0144475		ENSG00000071051	-0.503169	6.05953e-07		ENSG00000068654	-0.105884	0.00649879		ENSG00000074842	-0.100964	0.0265005
ENSG00000032389	-0.106685	1.81804e-06		ENSG00000071967	0.160965	0.00303542		ENSG00000068878	0.181762	0.00917304		ENSG00000075240	0.191086	0.00105978
ENSG00000035862	0.218929	3.71321e-12		ENSG00000072364	0.182919	0.00833009		ENSG00000069493	0.144875	0.0436106		ENSG00000075618	-0.249385	0.000420053
ENSG00000038382	0.130627	0.00521465		ENSG00000073417	0.226676	0.0149958		ENSG00000069849	0.249643	0.00337101		ENSG00000075624	-0.36564	0.00613471
ENSG00000038945	0.726458	1.15394e-40		ENSG00000073849	-0.268659	0.0242558		ENSG00000070540	0.178861	0.00801789		ENSG00000075945	-0.135871	0.0353181
ENSG00000039319	0.135343	1.46503e-05		ENSG00000074590	-0.181364	0.0284643		ENSG00000070808	-0.149939	0.0342724		ENSG00000076356	-0.107127	0.0456813
ENSG00000040933	0.172333	3.1049e-05		ENSG00000074706	-0.838553	3.6635e-13		ENSG00000071051	-0.676332	2.2017e-09		ENSG00000076641	-0.334133	0.0362058
ENSG00000042980	0.117838	0.0284255		ENSG00000075618	-0.212101	9.52389e-06		ENSG00000071967	0.180688	0.000401122		ENSG00000077420	-0.328325	0.0180304
ENSG00000043143	0.105908	4.72144e-07		ENSG00000075884	0.308985	0.00310612		ENSG00000073417	0.298422	0.00469056		ENSG00000078053	-0.103859	0.0326344
ENSG00000043462	-0.227942	5.07399e-08		ENSG00000077420	-0.345586	0.00137992		ENSG00000073849	-0.262776	0.0171349		ENSG00000079156	-0.182613	0.0360025
ENSG00000044574	-0.204275	4.17608e-10		ENSG00000078018	-0.247888	0.00418701		ENSG00000074317	-0.112824	0.0483713		ENSG00000079841	-0.144246	0.00405556
ENSG00000046653	-0.146901	2.88871e-06		ENSG00000078304	0.245111	0.00035836		ENSG00000074416	-0.138359	0.00499367		ENSG00000081923	-0.225986	4.24716e-05
ENSG00000047188	-0.101239	0.00186862		ENSG00000079277	-0.353024	1.26785e-05		ENSG00000074706	-0.980402	2.20978e-15		ENSG00000084731	-0.167156	0.00633279
ENSG00000047648	0.171249	0.00116153		ENSG00000079819	-0.20679	0.0338426		ENSG00000074842	-0.109222	0.0123262		ENSG00000085514	0.275928	0.00261637
ENSG00000048052	-0.54341	8.85661e-20		ENSG00000082397	0.321496	0.0211719		ENSG00000075151	-0.216997	0.0346653		ENSG00000086730	-0.306582	0.00601534
ENSG00000048471	0.158043	0.00132504		ENSG00000082996	0.241612	0.00539034		ENSG00000075240	0.1241	0.0234393		ENSG00000088986	-0.225193	0.0180304
ENSG00000048740	0.376625	8.01054e-16		ENSG00000084070	0.266385	0.0069399		ENSG00000075618	-0.239259	2.6639e-07		ENSG00000090104	0.599218	0.00070356
ENSG00000049618	0.168518	0.000198444		ENSG00000084731	-0.167316	4.83296e-05		ENSG00000075624	-0.327967	0.000976855		ENSG00000090266	-0.130315	0.00430802
ENSG00000049860	0.13318	8.20561e-09		ENSG00000085377	-0.144308	0.00971258		ENSG00000075884	0.25285	0.0228589		ENSG00000091129	-0.229967	0.000505359
ENSG00000050165	-0.118845	6.93404e-05		ENSG00000085514	0.264137	4.83296e-05		ENSG00000076108	0.119649	0.0227711		ENSG00000095585	-0.293585	0.0365489
ENSG00000051108	0.246723	3.75334e-11		ENSG00000086730	-0.223163	0.00603721		ENSG00000077063	0.266304	0.0248636		ENSG00000095794	0.300659	0.0118713
ENSG00000052795	0.148452	0.00140352		ENSG00000087250	-0.185458	0.0485841		ENSG00000077420	-0.319208	0.00790297		ENSG00000099810	-0.201211	0.0456813
ENSG00000053254	-0.189066	0.000411668		ENSG00000087258	-0.133138	7.10962e-05		ENSG00000079277	-0.321696	0.00103261		ENSG00000100014	-0.246606	0.0184069
ENSG00000053524	-0.101885	0.00119166		ENSG00000087589	0.131719	0.037973		ENSG00000080608	-0.187103	0.0166269		ENSG00000100100	0.206749	0.00528077
ENSG00000054611	0.142318	0.00645385		ENSG00000088448	0.199655	0.00835916		ENSG00000081320	0.167738	0.00626809		ENSG00000100505	-0.139238	0.0217409
ENSG00000054965	-0.188354	3.1116e-05		ENSG00000088538	-0.207417	0.000764977		ENSG00000081923	-0.151324	0.0109624		ENSG00000100644	0.511156	0.00674733
ENSG00000055130	-0.108921	0.00830185		ENSG00000088986	-0.120815	0.0308494		ENSG00000082397	0.445127	0.00155295		ENSG00000100784	0.227053	0.0121176
ENSG00000055208	-0.108752	0.0368903		ENSG00000089009	-0.135981	0.0471113		ENSG00000082996	0.253602	0.0145616		ENSG00000100890	-0.128332	0.0257188
ENSG00000057252	0.124386	0.000316519		ENSG00000089048	-0.14199	0.0176953		ENSG00000083123	-0.162294	0.0350643		ENSG00000100902	-0.102886	0.0257188
ENSG00000057657	0.218808	7.70681e-14		ENSG00000089351	-0.187208	0.0116812		ENSG00000083312	0.193076	0.00793285		ENSG00000101079	-0.129384	0.0313766
ENSG00000057704	0.143719	0.000198665		ENSG00000090104	0.588983	5.78695e-06		ENSG00000083799	0.128473	0.0480287		ENSG00000101463	-0.815674	3.27652e-05
ENSG00000058091	0.137157	4.2862e-06		ENSG00000091129	-0.111838	0.0348985		ENSG00000084070	0.433164	5.57814e-06		ENSG00000101849	0.166	0.0382134
ENSG00000059377	0.196546	8.99612e-05		ENSG00000091428	-0.100369	0.0316741		ENSG00000085514	0.287862	0.000169021		ENSG00000101966	-0.138828	0.0385884
ENSG00000059728	0.115552	1.22198e-06		ENSG00000092096	-0.157612	6.46373e-05		ENSG00000085662	0.135216	0.010002		ENSG00000102109	-0.212606	0.00430802
ENSG00000062716	0.225171	1.97856e-07		ENSG00000092964	-0.242749	0.00135993		ENSG00000086730	-0.191045	0.0463862		ENSG00000102445	-0.250327	0.0388845
ENSG00000064652	0.114858	0.0034445		ENSG00000094916	-0.136769	0.00141235		ENSG00000087589	0.201602	0.00029097		ENSG00000103187	-0.22729	0.0461102
ENSG00000064763	-0.255284	9.00335e-08		ENSG00000095370	-0.106622	0.00187539		ENSG00000089048	-0.140029	0.0097467		ENSG00000103769	-0.241798	0.00289742
ENSG00000064999	-0.155086	0.00218942		ENSG00000095585	-0.252014	0.0183782		ENSG00000089123	-0.117976	0.0435023		ENSG00000104435	-0.208575	0.0100057
ENSG00000065243	0.117352	0.00738722		ENSG00000095794	0.395283	6.92524e-07		ENSG00000089351	-0.295313	0.0001893		ENSG00000104722	-0.127137	0.0461102
ENSG00000065413	0.148806	0.00560242		ENSG00000095951	0.119134	0.0481029		ENSG00000089820	-0.115001	0.0252749		ENSG00000104763	0.260222	0.0164924
ENSG00000065882	-0.109195	0.0276619		ENSG00000096060	0.452292	0.00132198		ENSG00000090104	0.531123	0.000199118		ENSG00000104833	-0.183174	0.040325
ENSG00000066032	-0.167432	4.89766e-08		ENSG00000099954	-0.201269	3.72091e-05		ENSG00000090376	0.250336	0.0144415		ENSG00000104964	-0.206814	0.0132006
ENSG00000066294	0.127664	0.000101105		ENSG00000100077	0.223086	0.0118585		ENSG00000091592	0.178781	0.0106155		ENSG00000105639	-0.265634	0.0405873
ENSG00000066427	0.117994	2.71087e-05		ENSG00000100100	0.205806	6.26982e-05		ENSG00000092068	0.100228	0.0163091		ENSG00000105697	-0.267498	0.0341265
ENSG00000066629	0.120243	0.000108684		ENSG00000100354	0.212596	0.0142186		ENSG00000092964	-0.20596	0.0121441		ENSG00000105711	-0.15656	0.0296487
ENSG00000066651	-0.139985	3.72341e-06		ENSG00000100505	-0.103366	0.00583688		ENSG00000095585	-0.24084	0.0390131		ENSG00000105835	0.485039	0.0353181
ENSG00000067066	-0.127026	0.00877318		ENSG00000100596	-0.239313	0.0223391		ENSG00000095794	0.340919	0.000116136		ENSG00000105889	-0.236285	0.000100172
ENSG00000067113	-0.103957	0.00055781		ENSG00000100644	0.489464	1.87836e-05		ENSG00000096060	0.468647	0.000387605		ENSG00000106153	-0.233932	1.32234e-05
ENSG00000067715	-0.266997	9.78732e-07		ENSG00000100784	0.165736	0.0100263		ENSG00000096717	0.115727	0.0406709		ENSG00000106617	0.432004	0.00164864
ENSG00000067798	-0.57915	1.12288e-21		ENSG00000101096	-0.232356	0.0239116		ENSG00000099139	0.164704	0.0191712		ENSG00000106682	-0.125448	0.0382134
ENSG00000067992	0.130457	1.74542e-05		ENSG00000101463	-0.650041	1.88563e-05		ENSG00000099331	0.234685	0.029603		ENSG00000106799	-0.477565	0.00668363
ENSG00000068024	-0.147571	0.00160315		ENSG00000101464	-0.104808	0.00686858		ENSG00000100055	-0.198333	0.0154533		ENSG00000107263	0.485148	0.000154229
ENSG00000068724	0.245404	5.74748e-06		ENSG00000101596	0.184556	0.0255217		ENSG00000100077	0.277026	0.00499367		ENSG00000107758	-0.165515	0.0331911
ENSG00000069275	-0.121792	1.65808e-05		ENSG00000101972	0.152658	0.0415717		ENSG00000100100	0.239747	1.4788e-06		ENSG00000107957	0.164765	0.00628654
ENSG00000069493	0.12253	0.00037438		ENSG00000102445	-0.206189	0.0177283		ENSG00000100219	-0.13271	0.0143199		ENSG00000108021	-0.245635	0.0178474
ENSG00000069849	0.243373	9.46283e-11		ENSG00000102531	0.194178	0.0426075		ENSG00000100354	0.236374	0.0105454		ENSG00000108669	0.231096	0.0397578
ENSG00000069974	0.154751	3.60009e-06		ENSG00000102699	0.233768	0.00179998		ENSG00000100644	0.5674	5.49911e-05		ENSG00000108953	-0.203343	0.0101954
ENSG00000070540	0.136939	1.87531e-07		ENSG00000102753	-0.202013	0.002778		ENSG00000101247	-0.109768	0.00337101		ENSG00000109133	-0.101867	0.0349811
ENSG00000070785	-0.147228	1.7437e-07		ENSG00000103249	0.109463	0.0239116		ENSG00000101290	0.133097	0.0391784		ENSG00000109466	-0.260107	0.0118713
ENSG00000070808	-0.139043	1.16248e-05		ENSG00000104763	0.366943	2.68353e-06		ENSG00000101463	-0.511379	0.00282875		ENSG00000109971	-0.180668	0.048424
ENSG00000070882	0.22616	9.34172e-07		ENSG00000104765	0.2005	0.0389961		ENSG00000101849	0.169856	0.00901936		ENSG00000110955	-0.145141	0.0397578
ENSG00000071051	-0.650394	5.24288e-32		ENSG00000105063	-0.100394	0.00466599		ENSG00000101972	0.218858	0.00194746		ENSG00000111269	0.206919	0.0167892
ENSG00000071054	-0.160303	0.000643749		ENSG00000105176	-0.140545	0.0482435		ENSG00000102172	0.172179	0.00673714		ENSG00000111669	-0.167575	0.0373939
ENSG00000071073	-0.11318	0.0472238		ENSG00000105696	-0.105958	0.0308221		ENSG00000102445	-0.219971	0.029603		ENSG00000111674	-0.231104	0.0118713
ENSG00000071082	-0.105705	0.0019095		ENSG00000105697	-0.241995	0.0489756		ENSG00000102531	0.265135	0.0150223		ENSG00000111846	-0.209149	0.0373939
ENSG00000071967	0.157016	5.58007e-10		ENSG00000105835	0.566523	0.000122586		ENSG00000102580	-0.209702	0.0149462		ENSG00000111885	0.34939	0.00223337
ENSG00000072274	0.203404	4.36522e-07		ENSG00000106034	-0.261881	0.0179839		ENSG00000102595	-0.197512	0.0204433		ENSG00000112038	-0.181312	0.0313766
ENSG00000072364	0.116068	0.000440431		ENSG00000106066	0.280068	0.00847833		ENSG00000102699	0.239795	0.000957945		ENSG00000112576	0.366554	0.00360358
ENSG00000073417	0.327806	1.69624e-14		ENSG00000106617	0.483323	6.05953e-07		ENSG00000103018	-0.111584	0.00292126		ENSG00000112697	-0.146097	0.0169775
ENSG00000073849	-0.331968	2.03894e-08		ENSG00000106799	-0.44484	5.6021e-05		ENSG00000103064	-0.192984	0.00611843		ENSG00000112699	-0.319957	0.00466536
ENSG00000074054	0.125115	0.00234274		ENSG00000107263	0.381903	0.00049808		ENSG00000103657	0.173632	0.0477011		ENSG00000113269	0.289043	0.00613232
ENSG00000074317	-0.106077	4.05987e-05		ENSG00000107290	-0.164928	0.0428337		ENSG00000104324	0.301885	0.0011585		ENSG00000113522	-0.145231	0.0329406
ENSG00000074590	-0.120265	0.00033284		ENSG00000107518	-0.154777	0.0275626		ENSG00000104687	-0.141392	9.75065e-06		ENSG00000113583	-0.105463	0.046472
ENSG00000074706	-1.0022	1.83275e-63		ENSG00000107957	0.17258	0.000762941		ENSG00000104763	0.397088	1.02316e-06		ENSG00000113719	0.286559	0.00289427
ENSG00000075151	-0.201605	3.10077e-05		ENSG00000108306	0.184711	0.0150923		ENSG00000104765	0.346363	8.91792e-05		ENSG00000114127	0.160072	0.0491038
ENSG00000075240	0.142308	1.61737e-09		ENSG00000108395	-0.109644	0.0479462		ENSG00000105576	-0.103155	0.0141705		ENSG00000114251	-0.164096	0.0392069
ENSG00000075539	0.124677	0.00205042		ENSG00000109180	-0.122231	0.0414251		ENSG00000105643	0.141797	0.00244251		ENSG00000114861	0.394542	0.0144605
ENSG00000075618	-0.252781	1.33537e-27		ENSG00000109323	0.227715	0.0231492		ENSG00000105697	-0.316926	0.00133522		ENSG00000115053	-0.127445	0.0169077
ENSG00000075624	-0.193452	9.93345e-06		ENSG00000109381	0.265717	0.00227607		ENSG00000105835	0.489935	0.00716544		ENSG00000115252	-0.109455	0.0185348
ENSG00000075884	0.197428	0.000139802		ENSG00000109458	0.261294	0.000745115		ENSG00000105889	-0.160958	0.0315962		ENSG00000115306	-0.220212	0.00115327
ENSG00000076641	-0.223007	1.77073e-05		ENSG00000109472	-0.154327	0.0139248		ENSG00000106066	0.394343	0.000354692		ENSG00000116120	-0.131888	0.0169077
ENSG00000077063	0.227876	7.88365e-06		ENSG00000109606	-0.137475	0.0330845		ENSG00000106617	0.675878	3.55342e-14		ENSG00000116675	-0.161742	0.0180628
ENSG00000077232	-0.1347	1.46863e-08		ENSG00000109654	-0.122682	0.0145474		ENSG00000106799	-0.471767	5.26465e-05		ENSG00000117114	-0.107309	0.0158538
ENSG00000077238	-0.119494	0.0121476		ENSG00000109756	-0.279508	0.00124853		ENSG00000107263	0.576917	1.56107e-07		ENSG00000117450	-0.102534	0.0354118
ENSG00000077420	-0.336482	6.59819e-10		ENSG00000109906	0.458115	6.26982e-05		ENSG00000107758	-0.14057	0.0251329		ENSG00000117505	-0.116246	0.0209398
ENSG00000078018	-0.222343	4.57331e-07		ENSG00000110079	0.285191	1.45012e-05		ENSG00000107957	0.13836	0.00791173		ENSG00000118515	0.303527	0.00360358
ENSG00000078304	0.173035	3.34019e-06		ENSG00000110092	-0.140154	0.0149365		ENSG00000108175	0.255896	0.000870464		ENSG00000118705	-0.151664	0.0375916
ENSG00000078328	-0.229495	3.29292e-05		ENSG00000110324	0.264592	1.19079e-05		ENSG00000108306	0.329424	3.47082e-06		ENSG00000118785	-0.617492	0.0429018
ENSG00000078403	0.104514	0.0145359		ENSG00000110436	-0.152622	0.0470965		ENSG00000108389	-0.101625	0.0279292		ENSG00000119242	-0.129374	0.0315951
ENSG00000078674	0.117928	0.00523945		ENSG00000110852	0.112462	0.0308221		ENSG00000108798	-0.117017	0.0262952		ENSG00000119396	-0.132235	0.0414649
ENSG00000079156	-0.174288	2.2992e-09		ENSG00000110934	-0.223636	0.000129081		ENSG00000108960	-0.104227	0.0245993		ENSG00000119705	-0.179972	4.64796e-05
ENSG00000079277	-0.287807	5.7984e-12		ENSG00000111266	0.152391	0.0419227		ENSG00000109323	0.308178	0.000383269		ENSG00000120129	0.32605	0.00933551
ENSG00000079819	-0.137321	0.00814983		ENSG00000111269	0.163595	0.0141627		ENSG00000109381	0.28923	0.00119767		ENSG00000120251	-0.199079	0.0375916
ENSG00000079950	0.185881	2.61539e-06		ENSG00000111275	0.135426	0.01182		ENSG00000109458	0.295386	0.00044279		ENSG00000120885	-0.389723	0.0273559
ENSG00000080546	0.129795	0.00103082		ENSG00000111731	-0.155709	0.0283673		ENSG00000109466	-0.211666	0.0256994		ENSG00000122862	0.807525	1.05482e-05
ENSG00000080608	-0.196044	4.49162e-10		ENSG00000111885	0.25314	0.00603721		ENSG00000109472	-0.195486	0.00649879		ENSG00000122965	-0.135119	0.0118713
ENSG00000080815	0.119001	0.00029941		ENSG00000112038	-0.172662	0.000897977		ENSG00000109756	-0.20306	0.0262957		ENSG00000123094	-0.441698	0.0211325
ENSG00000080824	-0.223195	0.000585043		ENSG00000112159	-0.11839	0.0440206		ENSG00000109906	0.501738	9.75065e-06		ENSG00000123416	-0.399452	0.00476363
ENSG00000081320	0.125934	3.63661e-07		ENSG00000112242	-0.220546	0.00780279		ENSG00000110092	-0.174245	0.000967446		ENSG00000123562	-0.210633	0.00292755
ENSG00000081913	0.122696	1.52044e-05		ENSG00000112249	-0.237472	0.00493477		ENSG00000110324	0.231776	0.00339194		ENSG00000125249	-0.194361	0.00248738
ENSG00000081923	-0.113946	1.88889e-05		ENSG00000112576	0.364134	0.000178133		ENSG00000110917	-0.107436	0.0231244		ENSG00000125821	-0.120075	0.0405969
ENSG00000082269	0.164811	0.00022954		ENSG00000113269	0.221449	0.0100263		ENSG00000111266	0.192994	0.00638838		ENSG00000127022	-0.167907	0.0453235
ENSG00000082397	0.407439	1.19849e-13		ENSG00000113583	-0.159493	7.43586e-05		ENSG00000111269	0.197433	0.00358143		ENSG00000127184	-0.181424	0.0382134
ENSG00000082996	0.323387	7.85987e-15		ENSG00000113649	-0.171187	0.00164497		ENSG00000111275	0.111204	0.0404537		ENSG00000128594	-0.113148	0.000100172
ENSG00000083223	0.10535	0.00270068		ENSG00000114013	0.26343	0.00292788		ENSG00000111885	0.39128	5.58811e-06		ENSG00000128739	-0.243966	0.00746898
ENSG00000083312	0.152232	0.000172827		ENSG00000114757	-0.125602	0.00164497		ENSG00000112038	-0.281757	2.86615e-08		ENSG00000129351	-0.114628	0.0332925
ENSG00000084070	0.356248	1.75521e-11		ENSG00000114796	0.23588	0.000253508		ENSG00000112576	0.476065	1.4788e-06		ENSG00000130066	0.420134	0.0318453
ENSG00000084731	-0.116806	1.1647e-07		ENSG00000114861	0.597556	6.00732e-07		ENSG00000112893	0.394788	0.00060592		ENSG00000130340	0.211277	0.0334469
ENSG00000085514	0.266515	1.21551e-13		ENSG00000115165	0.114049	0.0488814		ENSG00000113048	-0.147951	0.0018352		ENSG00000130429	-0.140683	0.0362058
ENSG00000085662	0.130849	9.40402e-10		ENSG00000115183	-0.237292	0.00563772		ENSG00000113269	0.308442	0.000957952		ENSG00000130775	0.259681	0.00211035
ENSG00000086062	0.13833	0.000462387		ENSG00000115306	-0.122746	0.00920932		ENSG00000113583	-0.122449	0.00682428		ENSG00000131446	0.27465	0.00558702
ENSG00000086102	-0.12625	5.30292e-05		ENSG00000115364	-0.108291	4.83296e-05		ENSG00000113649	-0.148509	0.0122732		ENSG00000131711	-0.402537	0.0112043
ENSG00000086730	-0.173064	8.75405e-07		ENSG00000115421	0.179137	0.0147031		ENSG00000113742	-0.256585	0.0114226		ENSG00000131773	-0.428271	0.00213257
ENSG00000087250	-0.173586	0.000649591		ENSG00000115548	0.179909	0.0115367		ENSG00000113851	0.119601	0.040026		ENSG00000132535	-0.117289	0.00666388
ENSG00000087253	-0.14405	0.00289807		ENSG00000115919	0.237979	0.0140172		ENSG00000113916	-0.262768	0.0176223		ENSG00000132639	-0.442469	0.0456813
ENSG00000087460	-0.106324	0.00597099		ENSG00000116120	-0.106326	0.0275626		ENSG00000114013	0.246594	0.0112405		ENSG00000132718	-0.152325	0.0149571
ENSG00000087589	0.220618	2.64792e-15		ENSG00000116604	0.146995	0.00603721		ENSG00000114686	-0.118502	0.0336053		ENSG00000132970	-0.106734	0.0104593
ENSG00000088448	0.179857	7.49565e-08		ENSG00000117115	0.333198	0.0437868		ENSG00000114796	0.287647	1.97932e-05		ENSG00000133083	-0.193597	0.00807532
ENSG00000088538	-0.118995	0.000219518		ENSG00000117174	-0.108615	0.0170673		ENSG00000114861	0.703752	1.21263e-10		ENSG00000133121	0.395474	0.0314419
ENSG00000088986	-0.106763	0.000556024		ENSG00000117616	0.152357	0.0495533		ENSG00000115310	-0.176356	0.0379322		ENSG00000133134	-0.144633	0.00430802
ENSG00000089177	0.10814	0.0125335		ENSG00000117697	-0.130366	0.0471824		ENSG00000115421	0.181368	0.0181161		ENSG00000133816	-0.138608	0.00857709
ENSG00000089220	-0.157323	0.000387767		ENSG00000118257	0.131774	0.0412069		ENSG00000115548	0.182235	0.00336618		ENSG00000134532	-0.219747	0.0280546
ENSG00000089351	-0.210889	9.42751e-11		ENSG00000118263	0.217992	0.000641421		ENSG00000115825	-0.175947	0.0389862		ENSG00000135363	-0.215822	0.0104593
ENSG00000089902	0.125938	0.00123812		ENSG00000118689	0.259786	0.0115367		ENSG00000115919	0.242969	0.0229179		ENSG00000135472	-0.226109	0.0142815
ENSG00000089916	0.104616	0.00509548		ENSG00000118705	-0.124431	0.0239116		ENSG00000117020	0.255262	0.00657191		ENSG00000135540	0.790102	1.15543e-06
ENSG00000090104	0.626153	1.52548e-17		ENSG00000118785	-0.611548	0.00528955		ENSG00000117115	0.462163	0.00116144		ENSG00000135916	-0.150794	0.0428553
ENSG00000090376	0.182944	0.000250727		ENSG00000118855	0.190777	0.0140968		ENSG00000117616	0.200558	0.00721978		ENSG00000136040	0.237468	0.00398502
ENSG00000090530	-0.116127	0.00449488		ENSG00000118985	0.310035	0.0181196		ENSG00000117632	-0.139894	0.0425084		ENSG00000136045	-0.105389	0.00420878
ENSG00000091039	0.157087	4.5654e-05		ENSG00000120063	0.301149	0.00496679		ENSG00000118058	0.15314	0.0248842		ENSG00000136295	0.162393	0.0280546
ENSG00000091592	0.143612	6.849e-05		ENSG00000120129	0.315794	0.00229081		ENSG00000118260	0.165187	0.0145224		ENSG00000136531	-0.141578	0.0379389
ENSG00000092964	-0.236246	1.31776e-10		ENSG00000120251	-0.124772	0.0488308		ENSG00000118263	0.222714	0.00293703		ENSG00000136717	-0.524758	6.91285e-06
ENSG00000095585	-0.33733	1.90163e-12		ENSG00000120885	-0.236375	0.0297704		ENSG00000118363	-0.122154	0.0163648		ENSG00000137154	-0.25595	0.0142998
ENSG00000095787	0.124692	0.00141505		ENSG00000122862	0.5548	0.000729991		ENSG00000118515	0.219721	0.030182		ENSG00000137193	-0.184605	0.0247452
ENSG00000095794	0.416756	1.08993e-21		ENSG00000123094	-0.463706	4.54525e-05		ENSG00000118689	0.293059	0.000967446		ENSG00000137210	-0.174706	0.0287297
ENSG00000095951	0.153192	3.79098e-09		ENSG00000123095	-0.269614	0.00596714		ENSG00000118785	-0.652809	0.00721978		ENSG00000137267	-0.121045	0.00455222
ENSG00000096060	0.404756	2.33634e-09		ENSG00000123096	-0.12087	0.037973		ENSG00000118855	0.185159	0.0213852		ENSG00000137393	0.365156	0.0185348
ENSG00000096384	-0.126613	0.00153266		ENSG00000123104	-0.216658	0.0295858		ENSG00000118985	0.512971	0.00026176		ENSG00000137575	0.249365	0.0379389
ENSG00000099139	0.215124	2.77404e-10		ENSG00000123106	0.195578	0.032519		ENSG00000119048	0.144673	0.0308464		ENSG00000137942	-0.212379	0.037687
ENSG00000099308	-0.101021	1.89881e-05		ENSG00000123119	-0.11715	0.0367346		ENSG00000119335	-0.107074	0.00957164		ENSG00000138134	-0.243888	0.00492958
ENSG00000099331	0.19697	6.05508e-07		ENSG00000123562	-0.131647	0.0105481		ENSG00000119950	0.133468	0.00760943		ENSG00000138190	-0.210275	0.0429018
ENSG00000099810	-0.101666	0.0273994		ENSG00000125454	-0.108061	0.0147104		ENSG00000120063	0.444682	6.47817e-05		ENSG00000138639	0.416328	0.000192565
ENSG00000099954	-0.101551	2.76108e-06		ENSG00000125485	-0.109412	0.00227607		ENSG00000120129	0.338814	0.000146559		ENSG00000139116	-0.130397	0.000389314
ENSG00000100014	-0.12757	0.0076379		ENSG00000125730	-0.27974	0.00303542		ENSG00000120251	-0.173916	0.0100854		ENSG00000139178	-0.150801	0.000468819
ENSG00000100055	-0.135061	9.83054e-06		ENSG00000125952	0.161782	0.037973		ENSG00000120690	0.275028	0.00103003		ENSG00000139182	-0.120548	0.0472298
ENSG00000100077	0.295502	1.40415e-12		ENSG00000126016	-0.173074	4.965e-05		ENSG00000120899	0.170406	0.0463713		ENSG00000139220	-0.138133	0.0242255
ENSG00000100100	0.243235	1.25153e-22		ENSG00000126217	-0.226111	0.0138023		ENSG00000121741	0.163561	0.0477277		ENSG00000139624	-0.117124	0.0140963
ENSG00000100201	0.127204	0.00065382		ENSG00000126602	-0.109516	0.00694788		ENSG00000122862	0.736884	3.29712e-06		ENSG00000139832	0.356348	0.000468819
[truncated: 838 more rows]

## Sheet: Proliferation vs HM
AD group				Normal group				PART group				Resilience group
[truncated: 1,946 more rows]

[truncated: 2 more sheets: Tau vs HM, T cell vs HM]
