# Supplementary material for: A Scalable Human Brain Cell Atlas Foundation Model Dissects the Cellular Immune Codes and Cognitive Resilience
Source: Research Square preprint supplement (doi:10.21203/rs.3.rs-6986171/v1), 2025-07-08
Supplement: Supplementary file 5 [file Supplemental_Table_S2.xlsx]

## Sheet: SST_neuron_AD_vs_Resilience
ENSEMBL ID	log2FC	FDR
ENSG00000004478	-0.0971632	0.00396704
ENSG00000007202	0.0990988	0.00066302
ENSG00000008735	-0.0931962	0.0331116
ENSG00000010404	-0.228226	0.0282729
ENSG00000015479	0.112607	0.0124611
ENSG00000029153	0.109485	0.00066302
ENSG00000031698	0.144015	0.000631371
ENSG00000034510	-0.185507	0.0281155
ENSG00000035687	0.181631	0.00066302
ENSG00000036549	0.35885	0.000631371
ENSG00000047346	0.299862	0.000631371
ENSG00000047578	0.181589	0.000631371
ENSG00000047621	0.144944	0.00066302
ENSG00000050165	-0.145089	0.0343426
ENSG00000063241	-0.0340234	0.0493672
ENSG00000065060	0.245448	0.000631371
ENSG00000065154	-0.0904414	0.0209099
ENSG00000067840	-0.0597343	0.0415307
ENSG00000071553	-0.0917749	0.0373333
ENSG00000072415	0.162591	0.000631371
ENSG00000075624	-0.226857	0.0115292
ENSG00000081870	0.105519	0.00069112
ENSG00000087250	-0.229216	0.0107529
ENSG00000087460	-0.216045	0.0247001
ENSG00000088854	0.50374	0.000631371
ENSG00000089220	-0.191737	0.0317057
ENSG00000089486	-0.0953923	0.0343426
ENSG00000089693	-0.0969584	0.0247001
ENSG00000090661	0.125906	0.0499237
ENSG00000090861	0.159244	0.000631371
ENSG00000099284	0.11966	0.000654949
ENSG00000099814	-0.0673289	0.0137302
ENSG00000100316	-0.191719	0.019435
ENSG00000101210	-0.217144	0.000646668
ENSG00000101439	-0.159768	0.00637212
ENSG00000101856	-0.124501	0.0295631
ENSG00000102125	0.0977818	0.000688465
ENSG00000102316	-0.0546772	0.0425386
ENSG00000102882	-0.0744266	0.0247001
ENSG00000102931	-0.0549757	0.0412634
ENSG00000103260	-0.0424265	0.0495296
ENSG00000103266	-0.0703849	0.0406492
ENSG00000103495	-0.0676504	0.0193285
ENSG00000104059	0.524705	0.000631371
ENSG00000104331	0.130107	0.00066302
ENSG00000104722	-0.0805638	0.0498851
ENSG00000104833	-0.157731	0.00542206
ENSG00000104957	0.0980945	0.000654949
ENSG00000105193	-0.110091	0.0369875
ENSG00000105270	-0.130701	0.00393408
ENSG00000105290	-0.148928	0.000631371
ENSG00000105568	-0.133487	0.0121688
ENSG00000105711	-0.0922685	0.0118206
ENSG00000105723	-0.0617867	0.0327846
ENSG00000105926	0.408486	0.000631371
ENSG00000105948	0.126708	0.000652026
ENSG00000105968	0.162061	0.000631371
ENSG00000106105	0.133742	0.000654949
ENSG00000106153	-0.121167	0.0149796
ENSG00000106868	0.0972564	0.0380434
ENSG00000107872	-0.0499016	0.0425786
ENSG00000108946	-0.112824	0.0398412
ENSG00000109265	0.633097	0.000631371
ENSG00000110321	-0.117305	0.0171501
ENSG00000110619	0.136302	0.000631371
ENSG00000110651	-0.113744	0.00587125
ENSG00000111647	0.267535	0.000631371
ENSG00000111674	-0.188703	0.00724895
ENSG00000112144	0.100754	0.000760571
ENSG00000112739	0.251076	0.000631371
ENSG00000113391	0.602877	0.000631371
ENSG00000113407	0.0774067	0.00125872
ENSG00000113643	0.141629	0.000631371
ENSG00000113648	0.206653	0.000631371
ENSG00000114405	0.121691	0.000631371
ENSG00000115866	0.188184	0.000631371
ENSG00000116299	0.246552	0.000631371
ENSG00000116661	-0.0678251	0.0268496
ENSG00000117152	-0.161784	0.00764149
ENSG00000118307	0.099077	0.000875984
ENSG00000123416	-0.327104	0.000631371
ENSG00000125149	0.0820078	0.000652026
ENSG00000126247	-0.0658274	0.0346489
ENSG00000126368	-0.03855	0.0152323
ENSG00000126870	0.370815	0.000631371
ENSG00000126945	-0.0702009	0.0445092
ENSG00000128272	-0.0511953	0.0459612
ENSG00000128590	-0.0342812	0.0432753
ENSG00000129295	0.280327	0.000631371
ENSG00000129355	-0.0880104	0.000631371
ENSG00000130522	-0.166766	0.0087728
ENSG00000130540	-0.114033	0.0281155
ENSG00000130558	-0.116786	0.0284685
ENSG00000130725	-0.0767883	0.031082
ENSG00000130731	-0.0806529	0.00125872
ENSG00000130748	-0.0772237	0.0304636
ENSG00000130921	0.106243	0.000652026
ENSG00000131095	-0.188295	0.010101
ENSG00000132341	-0.0975682	0.00536802
ENSG00000132475	0.163712	0.00066302
ENSG00000132692	-0.047741	0.00288374
ENSG00000133112	-0.131198	0.0398412
ENSG00000133193	0.0676835	0.000868202
ENSG00000133393	0.0729143	0.000652026
ENSG00000133641	0.0837014	0.00066302
ENSG00000133706	0.260813	0.000631371
ENSG00000133794	0.177784	0.000631371
ENSG00000134056	0.0703521	0.000875984
ENSG00000134440	0.121842	0.000646668
ENSG00000134590	-0.124791	0.000631371
ENSG00000134684	0.150226	0.000631371
ENSG00000135473	-0.0411743	0.0357214
ENSG00000135924	-0.0937546	0.0332063
ENSG00000136536	0.271954	0.000631371
ENSG00000136628	0.230994	0.000631371
ENSG00000136682	0.0808935	0.000646668
ENSG00000136819	-0.051487	0.0152323
ENSG00000137207	-0.0473528	0.0232197
ENSG00000137285	-0.0743301	0.0122752
ENSG00000137409	-0.131757	0.0369875
ENSG00000138193	0.127406	0.0332063
ENSG00000138688	0.498659	0.000631371
ENSG00000139200	-0.0942519	0.00566674
ENSG00000139644	-0.102678	0.0369875
ENSG00000140105	0.083888	0.000654949
ENSG00000140395	0.126677	0.000652026
ENSG00000140688	0.0747356	0.00066302
ENSG00000141219	0.0684831	0.000892755
ENSG00000141522	-0.0586588	0.0432753
ENSG00000141622	0.227337	0.000631371
ENSG00000142168	-0.131206	0.0155385
ENSG00000142534	-0.12069	0.0468015
ENSG00000143742	-0.0878462	0.0498851
ENSG00000143761	-0.0990004	0.0286553
ENSG00000143774	-0.134317	0.00255948
ENSG00000144583	0.346982	0.000631371
ENSG00000145375	0.260426	0.000631371
ENSG00000145416	0.703475	0.000631371
ENSG00000145495	0.472253	0.000631371
ENSG00000147996	0.15413	0.000631371
ENSG00000148362	-0.0514898	0.0214468
ENSG00000148798	-0.109739	0.0146828
ENSG00000149179	0.381195	0.000631371
ENSG00000149541	-0.0578065	0.0498851
ENSG00000149639	0.23759	0.000631371
ENSG00000151131	0.0901528	0.00066302
ENSG00000151136	0.424212	0.000631371
ENSG00000151553	0.132338	0.000646668
ENSG00000152242	0.196984	0.000631371
ENSG00000152763	0.153158	0.000733129
ENSG00000153310	0.620437	0.000631371
ENSG00000154096	-0.151065	0.0400852
ENSG00000154146	-0.189333	0.028033
ENSG00000154277	-0.232503	0.00853351
ENSG00000155744	0.376128	0.000631371
ENSG00000156030	0.0965667	0.000654949
ENSG00000156411	0.115924	0.000733129
ENSG00000156976	-0.165891	0.0369875
ENSG00000157514	-0.0837147	0.0167189
ENSG00000157654	0.596171	0.000631371
ENSG00000159335	-0.104963	0.0267679
ENSG00000160014	-0.201903	0.0242649
ENSG00000160714	-0.056789	0.0499815
ENSG00000162188	-0.0958149	0.0439564
ENSG00000162244	-0.131196	0.00139949
ENSG00000162545	-0.17889	0.013428
ENSG00000162636	0.166206	0.000631371
ENSG00000162929	0.264109	0.000631371
ENSG00000163041	0.114238	0.00122423
ENSG00000163689	0.102515	0.00133962
ENSG00000163888	-0.105275	0.040039
ENSG00000164032	0.0817128	0.00154985
ENSG00000164091	-0.0877226	0.0479732
ENSG00000164542	0.149402	0.000631371
ENSG00000164659	0.296002	0.000631371
ENSG00000164972	0.0929273	0.000739692
ENSG00000165119	-0.111475	0.0368282
ENSG00000165152	0.131172	0.000631371
ENSG00000165169	-0.086343	0.00474693
ENSG00000165406	0.170171	0.00066302
ENSG00000165672	-0.060114	0.018307
ENSG00000165943	-0.100611	0.0468702
ENSG00000166165	-0.234448	0.00367346
ENSG00000166352	0.0965475	0.000715809
ENSG00000166398	0.222097	0.000631371
ENSG00000166444	0.368335	0.000631371
ENSG00000166734	0.502383	0.000631371
ENSG00000166986	0.123195	0.000631371
ENSG00000167106	0.0735869	0.00066302
ENSG00000167526	-0.171511	0.0292625
ENSG00000167658	-0.122826	0.0115292
ENSG00000167996	-0.199451	0.0493672
ENSG00000168028	-0.11211	0.0353747
ENSG00000168159	-0.119424	0.00605108
ENSG00000168255	-0.159523	0.00717252
ENSG00000168273	0.0792858	0.000760229
ENSG00000168309	-0.101556	0.0127641
ENSG00000168481	-0.0585033	0.0432753
ENSG00000168490	-0.169981	0.00153126
ENSG00000168539	-0.0377063	0.0346489
ENSG00000169564	-0.0974425	0.00758417
ENSG00000170027	-0.186952	0.0273499
ENSG00000170315	-0.158163	0.01581
ENSG00000170445	0.160701	0.000631371
ENSG00000171314	-0.174331	0.00361276
ENSG00000171450	-0.0813598	0.00485472
ENSG00000171476	-0.0803178	0.00880421
ENSG00000171617	-0.129714	0.0184658
ENSG00000171703	-0.0744658	0.0131328
ENSG00000171867	-0.180866	0.0260467
ENSG00000172115	-0.0864427	0.0467334
ENSG00000172428	-0.101856	0.0120256
ENSG00000172500	-0.0412126	0.046545
ENSG00000172757	-0.173232	0.00488917
ENSG00000172775	0.108968	0.000631371
ENSG00000172785	0.110948	0.00066302
ENSG00000173598	-0.0721601	0.0117646
ENSG00000173674	-0.113538	0.0479733
ENSG00000173715	0.379849	0.000631371
ENSG00000173812	-0.170629	0.0168296
ENSG00000173915	0.110581	0.000646668
ENSG00000174684	-0.129247	0.0177629
ENSG00000174748	-0.16001	0.0330286
ENSG00000174775	-0.0577037	0.00861817
ENSG00000176903	-0.13239	0.000631371
ENSG00000177875	-0.0524947	0.0200687
ENSG00000178531	-0.0554177	0.0380522
ENSG00000178980	-0.153888	0.00846548
ENSG00000178988	-0.0595915	0.0171501
ENSG00000179010	-0.127684	0.0043831
ENSG00000179456	-0.0491558	0.0448559
ENSG00000180011	0.0791697	0.000743583
ENSG00000180116	0.0818711	0.0024719
ENSG00000181751	0.0826867	0.000898201
ENSG00000182831	0.09563	0.000631371
ENSG00000183172	-0.0532089	0.010101
ENSG00000183354	0.356703	0.000631371
ENSG00000183654	0.405141	0.000631371
ENSG00000183741	-0.111389	0.00632177
ENSG00000183833	0.180347	0.000631371
ENSG00000184524	-0.14923	0.00342164
ENSG00000184897	0.115603	0.000631371
ENSG00000185418	0.31417	0.000631371
ENSG00000186073	0.254795	0.000631371
ENSG00000186166	0.221869	0.000644218
ENSG00000186205	0.0764619	0.000969656
ENSG00000186310	-0.16555	0.00430024
ENSG00000186462	-0.143761	0.000654949
ENSG00000187094	-0.115123	0.0261682
ENSG00000187189	-0.130813	0.00862073
ENSG00000187522	0.0534598	0.0144804
ENSG00000187954	0.090092	0.000631371
ENSG00000188343	0.149804	0.000646668
ENSG00000188573	-0.0521691	0.0345136
ENSG00000188986	-0.0403382	0.0354694
ENSG00000189060	0.077413	0.000954849
ENSG00000189241	-0.169604	0.0292625
ENSG00000196123	0.0710539	0.000832669
ENSG00000196227	-0.116625	0.011165
ENSG00000196262	-0.158268	0.00867245
ENSG00000196305	0.218766	0.000631371
ENSG00000196872	0.224861	0.000715809
ENSG00000197045	-0.067513	0.0304636
ENSG00000197302	0.12058	0.00125872
ENSG00000197457	-0.106124	0.0400852
ENSG00000197872	0.376502	0.000631371
ENSG00000197943	0.502218	0.00186656
ENSG00000198060	0.115458	0.00063932
ENSG00000198668	-0.211097	0.0295631
ENSG00000198677	0.371099	0.000631371
ENSG00000198712	-0.429733	0.0285045
ENSG00000198763	-0.433842	0.00182895
ENSG00000198786	-0.245978	0.0308819
ENSG00000198840	-0.477768	0.00815344
ENSG00000198886	-0.420321	0.0116656
ENSG00000198888	-0.509079	0.000929934
ENSG00000198899	-0.521866	0.00513709
ENSG00000198938	-0.512507	0.00405421
ENSG00000198954	0.114922	0.000631371
ENSG00000203950	-0.0370819	0.0224013
ENSG00000204103	-0.153955	0.00355207
ENSG00000204314	-0.0830193	0.01581
ENSG00000204442	1.22812	0.000631371
ENSG00000204815	0.066074	0.000929934
ENSG00000204954	0.0727451	0.000792275
ENSG00000205129	0.0997029	0.00070487
ENSG00000205542	-0.30215	0.00666565
ENSG00000205765	0.0703127	0.00066302
ENSG00000212864	-0.0794509	0.0038235
ENSG00000213066	0.233385	0.000646668
ENSG00000213123	0.228473	0.000705702
ENSG00000214338	0.228076	0.000756033
ENSG00000225663	-0.0635177	0.0126733
ENSG00000233757	0.133345	0.000646668
ENSG00000240694	-0.189608	0.0149293
ENSG00000243667	0.14617	0.000654949
ENSG00000254469	0.0790003	0.000954849
ENSG00000263465	-0.0685365	0.00419321
ENSG00000264364	-0.121154	0.0136316
ENSG00000277586	-0.125479	0.0346489
ENSG00000284770	-0.0714307	0.00205269
ENSG00000291237	-0.210248	0.000646668

## Sheet: SST_neuron_AD_vs_Normal
ENSEMBL ID	log2FC	FDR
ENSG00000001460	0.022785	0.0322482
ENSG00000002016	0.0582864	0.0336527
ENSG00000002746	0.162692	0.00650572
ENSG00000002822	0.0750697	0.0146482
ENSG00000002834	0.0440765	0.0291423
ENSG00000003096	0.0440958	0.0493754
ENSG00000003393	0.079625	0.0169478
ENSG00000004139	0.0628518	0.0284482
ENSG00000004660	0.0453875	0.0459021
ENSG00000004864	0.0446233	0.0306586
ENSG00000004897	0.0863481	0.0261092
ENSG00000005020	0.0722629	0.0360588
ENSG00000005175	0.0500276	0.0091062
ENSG00000005249	0.109002	0.00558816
ENSG00000005339	0.0811151	0.0458215
ENSG00000005483	0.091837	0.0366654
ENSG00000005700	0.0781052	0.0365797
ENSG00000005884	0.0447179	0.0275899
ENSG00000005889	0.0888198	0.00396216
ENSG00000005893	0.0459953	0.0343391
ENSG00000006128	-0.0958496	0.033264
ENSG00000006530	0.0731154	0.00801457
ENSG00000006576	0.116659	0.0106341
ENSG00000006704	0.0673575	0.0478753
ENSG00000006715	0.0840899	0.0235688
ENSG00000006740	0.0983244	0.0476748
ENSG00000006831	0.0565384	0.0221123
ENSG00000007001	0.105084	0.0199818
ENSG00000007174	0.0646378	0.0132904
ENSG00000007202	0.0551945	0.0095423
ENSG00000007237	0.139875	0.00594624
ENSG00000007341	0.105242	0.00414028
ENSG00000007392	0.088894	0.0293782
ENSG00000007402	0.0697673	0.0401182
ENSG00000007545	0.0546456	0.0295145
ENSG00000008086	0.159167	0.00424299
ENSG00000008256	0.0967105	0.0305905
ENSG00000008277	0.120405	0.0295969
ENSG00000008838	0.0371213	0.0477043
ENSG00000008869	0.0807004	0.0176237
ENSG00000009335	0.114372	0.00739816
ENSG00000009413	0.160859	0.00783519
ENSG00000009694	0.211332	0.00679467
ENSG00000010017	0.0819205	0.024815
ENSG00000010244	0.0835894	0.0238121
ENSG00000010626	0.0397394	0.0377165
ENSG00000010810	0.0914342	0.032539
ENSG00000010818	0.15368	0.0067852
ENSG00000011258	0.0906772	0.0161759
ENSG00000011275	0.107386	0.0165279
ENSG00000011332	0.0513228	0.0274354
ENSG00000011347	0.0765374	0.00602267
ENSG00000011454	0.0877255	0.0453116
ENSG00000011566	0.137048	0.0154436
ENSG00000011677	0.0438498	0.0159818
ENSG00000012232	0.0488098	0.0333646
ENSG00000013293	0.122148	0.00516109
ENSG00000013375	0.0748032	0.00680964
ENSG00000015153	0.077537	0.0281961
ENSG00000015171	0.0905722	0.0288858
ENSG00000015475	0.0364057	0.0451187
ENSG00000015479	0.10927	0.000778206
ENSG00000015568	0.0476286	0.000881797
ENSG00000018236	0.131397	0.0387847
ENSG00000020922	0.061037	0.0177862
ENSG00000021645	0.167804	0.0199633
ENSG00000021776	0.077459	0.00940485
ENSG00000022567	0.0582722	0.0151669
ENSG00000022840	0.0514036	0.0455206
ENSG00000023041	0.0302206	0.0238544
ENSG00000024048	0.0943531	0.0367633
ENSG00000025039	0.0464314	0.0196492
ENSG00000025293	0.0788902	0.0225913
ENSG00000025796	0.0765471	0.0111774
ENSG00000025800	0.0933308	0.00686436
ENSG00000028277	0.0745686	0.00365981
ENSG00000028528	0.054467	0.0282353
ENSG00000029364	0.0427579	0.0489044
ENSG00000029534	0.115425	0.0278333
ENSG00000029725	0.107001	0.0117973
ENSG00000031003	0.0979247	0.0208279
ENSG00000031823	0.0453329	0.0208279
ENSG00000032389	0.0870913	0.00908998
ENSG00000033030	0.0812647	0.00272111
ENSG00000033122	0.18827	0.00792533
ENSG00000033170	0.101494	0.0419973
ENSG00000034677	0.0745371	0.0450346
ENSG00000035687	0.0862336	0.0240873
ENSG00000037637	0.121783	0.00624628
ENSG00000038210	0.0393533	0.0198403
ENSG00000039123	0.0902122	0.0168305
ENSG00000039139	0.0353153	0.0306806
ENSG00000040199	0.0744041	0.0141442
ENSG00000040341	0.129009	0.0379661
ENSG00000041515	0.168719	0.00524042
ENSG00000042286	0.0231544	0.0356518
ENSG00000042429	0.0495121	0.0327742
ENSG00000043143	0.0523674	0.0255413
ENSG00000043514	0.0635061	0.00785349
ENSG00000044115	0.0930362	0.00676206
ENSG00000044446	0.0449944	0.0249793
ENSG00000044459	0.0447845	0.00841904
ENSG00000046653	0.0945128	0.0391649
ENSG00000047056	0.072167	0.0457221
ENSG00000047230	0.0385972	0.0293247
ENSG00000047346	0.135341	0.0261388
ENSG00000047410	0.0528422	0.0425419
ENSG00000047578	0.0772342	0.0410583
ENSG00000047644	0.0679439	0.00272111
ENSG00000047648	0.16324	0.00337384
ENSG00000047662	0.0703545	0.0184243
ENSG00000048028	0.069569	0.00554881
ENSG00000048342	0.0798946	0.0200188
ENSG00000048540	0.107093	0.0101131
ENSG00000048707	0.122333	0.0130849
ENSG00000048740	0.130622	0.0241974
ENSG00000048991	0.125928	0.014553
ENSG00000049246	0.0837949	0.0331088
ENSG00000049618	0.128433	0.0274371
ENSG00000049759	0.115941	0.0317433
ENSG00000050030	0.115829	0.0176237
ENSG00000051108	-0.0387347	0.0343391
ENSG00000051825	0.0797683	0.0307524
ENSG00000052126	0.179907	0.00558816
ENSG00000052749	0.0435225	0.0161557
ENSG00000052841	0.109128	0.0222635
ENSG00000053108	0.073802	0.0072644
ENSG00000053524	0.119716	0.0248619
ENSG00000053900	0.0616179	0.0396242
ENSG00000054267	0.116974	0.0201154
ENSG00000054282	0.0904456	0.0480052
ENSG00000054392	0.0333802	0.0478753
ENSG00000054793	0.130653	0.00686436
ENSG00000054803	-0.0471019	0.0261375
ENSG00000054965	0.137489	0.0072564
ENSG00000055130	0.0834883	0.0359823
ENSG00000055208	0.0739655	0.0476036
ENSG00000055211	0.0413519	0.0311762
ENSG00000055483	0.0512085	0.0430227
ENSG00000055813	0.125176	0.00952372
ENSG00000055917	0.102913	0.0208091
ENSG00000056097	0.0908973	0.022333
ENSG00000056277	0.0358588	0.00597968
ENSG00000056586	0.0759016	0.00874142
ENSG00000057468	0.0538358	0.0423046
ENSG00000057935	0.114305	0.00586764
ENSG00000058804	0.0313176	0.0253841
ENSG00000059573	0.0302118	0.0235236
ENSG00000059758	0.0805874	0.0220655
ENSG00000060237	0.0927408	0.0445935
ENSG00000060339	0.0761347	0.0318506
ENSG00000060656	0.066937	0.0165824
ENSG00000060749	0.106347	0.00516109
ENSG00000061936	0.0718216	0.0307579
ENSG00000062650	0.0598719	0.0294921
ENSG00000062725	0.0781987	0.0259519
ENSG00000063127	0.0389538	0.0170671
ENSG00000063438	0.0280785	0.0281412
ENSG00000063601	0.0713996	0.0293954
ENSG00000063978	0.056675	0.00924847
ENSG00000064042	0.146871	0.0231908
ENSG00000064309	0.0926485	0.00624628
ENSG00000064393	0.0647399	0.0191342
ENSG00000064692	0.0578362	0.0113158
ENSG00000065060	0.115026	0.0221343
ENSG00000065150	0.0615195	0.0155413
ENSG00000065243	0.095706	0.0311762
ENSG00000065609	0.129847	0.0155923
ENSG00000065613	0.0507697	0.0361556
ENSG00000065615	0.0640174	0.0293709
ENSG00000065665	0.0556114	0.0308678
ENSG00000065833	0.11228	0.00779256
ENSG00000065882	0.115244	0.00272111
ENSG00000065883	0.145074	0.00686757
ENSG00000065923	0.0830921	0.0255892
ENSG00000065989	0.0729716	0.0165758
ENSG00000066032	0.199606	0.0104833
ENSG00000066044	0.049792	0.0276794
ENSG00000066135	0.0500209	0.0306724
ENSG00000066248	0.0285788	0.0187361
ENSG00000066382	0.10072	0.0339296
ENSG00000066427	0.0637378	0.0221343
ENSG00000066455	0.0320682	0.0412786
ENSG00000066583	0.0267596	0.047865
ENSG00000066739	0.0909887	0.00919105
ENSG00000066777	0.0992109	0.0228335
ENSG00000066827	0.0491719	0.0148735
ENSG00000066933	0.124105	0.0133943
ENSG00000067057	0.0589235	0.0452172
ENSG00000067113	0.104202	0.00924847
ENSG00000067141	0.099046	0.0220925
ENSG00000067167	0.0423525	0.0457862
ENSG00000067177	0.0405389	0.0227294
ENSG00000067208	0.121553	0.00919105
ENSG00000067369	0.105895	0.00787434
ENSG00000067533	0.0432144	0.0223469
ENSG00000067596	0.077111	0.0067852
ENSG00000067715	0.144038	0.0173789
ENSG00000067829	-0.0255472	0.0225886
ENSG00000067900	0.109422	0.00615878
ENSG00000067992	0.0782959	0.0412009
ENSG00000068354	0.0288323	0.0228245
ENSG00000068650	0.0556304	0.0449795
ENSG00000068784	0.059635	0.0134658
ENSG00000068796	0.0938411	0.0108881
ENSG00000069188	0.0372783	0.0459021
ENSG00000069667	0.173292	0.0193688
ENSG00000069702	0.0942468	0.0109929
ENSG00000069943	0.035964	0.0336527
ENSG00000069974	0.0747691	0.0132056
ENSG00000070010	0.0229516	0.0242657
ENSG00000070061	0.0679422	0.0269007
ENSG00000070081	0.0813553	0.00456908
ENSG00000070182	0.0634095	0.0213271
ENSG00000070366	0.103006	0.0165824
ENSG00000070614	0.0438815	0.00785989
ENSG00000070759	0.0348597	0.0172624
ENSG00000070785	0.059354	0.0410414
ENSG00000070808	0.109892	0.0221343
ENSG00000070950	0.0732669	0.0224739
ENSG00000071073	0.0930352	0.0228186
ENSG00000071189	0.100148	0.022333
ENSG00000071894	0.0263256	0.0219896
ENSG00000071909	0.051542	0.00530595
ENSG00000072041	0.073366	0.0189082
ENSG00000072071	0.109316	0.00618076
ENSG00000072121	0.0674539	0.00337384
ENSG00000072133	0.0753332	0.022608
ENSG00000072201	0.0673024	0.0311509
ENSG00000072210	0.0435462	0.0399728
ENSG00000072315	0.0702002	0.0455971
ENSG00000072518	0.0554052	0.0366015
ENSG00000072657	0.21643	0.0141296
ENSG00000072736	0.102038	0.00602267
ENSG00000072958	0.0476786	0.0281412
ENSG00000073008	0.063155	0.00523432
ENSG00000073050	0.0407227	0.015423
ENSG00000073060	0.0790341	0.0108632
ENSG00000073605	0.0259809	0.0479371
ENSG00000073614	0.0688039	0.0414768
ENSG00000073910	0.136709	0.0191328
ENSG00000074054	0.134777	0.0221291
ENSG00000074201	0.0688281	0.0462603
ENSG00000074211	0.175152	0.00271207
ENSG00000074319	0.0556487	0.0273153
ENSG00000074657	0.1298	0.00742292
ENSG00000075043	0.0628525	0.0444904
ENSG00000075131	0.0363575	0.0411665
ENSG00000075151	0.115399	0.0346416
ENSG00000075213	0.0517638	0.0322859
ENSG00000075240	0.0341553	0.0331895
ENSG00000075292	0.147731	0.0115569
ENSG00000075340	0.120775	0.00851983
ENSG00000075461	0.0846656	0.0184129
ENSG00000075568	0.109058	0.0148735
ENSG00000075711	0.13458	0.0102955
ENSG00000076108	0.0693953	0.00624628
ENSG00000076242	0.0470196	0.014013
ENSG00000076650	0.0357139	0.0143166
ENSG00000076685	0.0807175	0.038018
ENSG00000077063	0.097629	0.0493428
ENSG00000077092	0.0835907	0.00314675
ENSG00000077097	0.0965336	0.0161653
ENSG00000077235	0.060672	0.0399728
ENSG00000077264	0.185848	0.00701497
ENSG00000077279	0.126752	0.00554881
ENSG00000077380	0.10835	0.0172624
ENSG00000077458	0.0336967	0.02731
ENSG00000077549	0.0872946	0.0249885
ENSG00000077585	0.0509941	0.028033
ENSG00000077616	0.109306	0.0135143
ENSG00000078018	0.122428	0.0394511
ENSG00000078053	0.145685	0.00779256
ENSG00000078070	0.0670547	0.0304968
ENSG00000078140	0.125001	0.00803019
ENSG00000078142	0.0852527	0.0452172
ENSG00000078177	0.114692	0.00272111
ENSG00000078246	0.0546119	0.01065
ENSG00000078304	0.0959359	0.0260536
ENSG00000078328	0.135603	0.040898
ENSG00000078403	0.113851	0.0250322
ENSG00000078618	0.084555	0.0192702
ENSG00000078674	0.11507	0.0151034
ENSG00000078687	0.135345	0.00991165
ENSG00000078699	0.117348	0.00952372
ENSG00000078747	0.100694	0.00919105
ENSG00000079102	0.176194	0.00800513
ENSG00000079134	0.0616405	0.0412402
ENSG00000079387	0.0393947	0.0211381
ENSG00000079482	0.103549	0.00841815
ENSG00000079805	0.0969714	0.00530595
ENSG00000079819	0.120003	0.0435537
ENSG00000079950	0.108217	0.00688734
ENSG00000080224	0.157072	0.0402783
ENSG00000080298	0.143087	0.0123196
ENSG00000080345	0.0860238	0.0180092
ENSG00000080371	0.0623422	0.0387847
ENSG00000080561	0.0632924	0.00218563
ENSG00000080709	0.0797601	0.00686757
ENSG00000080802	0.106593	0.00903262
ENSG00000080815	0.0672132	0.0287573
ENSG00000080823	0.0850453	0.010535
ENSG00000080854	0.0882196	0.0202215
ENSG00000081014	0.0714882	0.00313592
ENSG00000081026	0.114496	0.00940485
ENSG00000081148	0.0354317	0.00841815
ENSG00000081665	0.0799903	0.0440616
ENSG00000081803	0.0671938	0.00642191
ENSG00000081870	0.0507453	0.0261466
ENSG00000081913	0.0884297	0.0236668
ENSG00000082068	0.113601	0.0212165
ENSG00000082212	0.0602239	0.0414915
ENSG00000082213	0.0305967	0.0434188
ENSG00000082458	0.0420779	0.0487979
ENSG00000082482	0.0927096	0.0181772
ENSG00000082516	0.0384059	0.0482673
ENSG00000082556	0.0269695	0.049545
ENSG00000082898	0.0986139	0.0206403
ENSG00000082996	0.0739687	0.048453
ENSG00000083067	0.242454	0.00924847
ENSG00000083093	0.026166	0.0350628
ENSG00000083290	0.0918468	0.0200188
ENSG00000083535	0.0931858	0.0426234
ENSG00000083642	0.133989	0.0178387
ENSG00000083828	0.109407	0.00624628
ENSG00000084070	0.0683946	0.0353585
ENSG00000084072	0.0442482	0.0186984
ENSG00000084112	0.0724688	0.0172624
ENSG00000084444	0.0309023	0.0318239
ENSG00000084676	0.119932	0.0412786
ENSG00000084733	0.0766853	0.030219
ENSG00000085185	0.0248945	0.0161653
ENSG00000085224	0.145891	0.016672
ENSG00000085274	0.026881	0.0256726
ENSG00000085377	0.0960359	0.010627
ENSG00000085382	0.0892448	0.0179202
ENSG00000085433	0.0598273	0.0351974
ENSG00000085491	0.0491086	0.00602267
ENSG00000085511	0.111445	0.00558816
ENSG00000085760	0.0262766	0.0168305
ENSG00000085832	0.066761	0.0482751
ENSG00000085871	0.0335068	0.0459021
ENSG00000085982	0.0608926	0.0185038
ENSG00000086062	0.0317073	0.0229961
ENSG00000086102	0.075938	0.0398752
ENSG00000087008	0.0502434	0.0251607
ENSG00000087076	0.0290752	0.0230031
ENSG00000087206	0.0891702	0.00801457
ENSG00000087258	0.107167	0.0278666
ENSG00000087269	0.0281505	0.00739816
ENSG00000087299	0.079208	0.0315839
ENSG00000087301	0.0986333	0.0239764
ENSG00000087338	0.0841144	0.0329896
ENSG00000087495	0.144232	0.00624628
ENSG00000087884	0.0353134	0.0460465
ENSG00000088179	0.129362	0.0151669
ENSG00000088298	0.0244429	0.0388061
ENSG00000088367	0.107421	0.0114268
ENSG00000088387	0.109306	0.0277694
ENSG00000088756	0.169152	0.00143665
ENSG00000088808	0.129013	0.00586764
ENSG00000088812	0.0890944	0.0221123
ENSG00000088888	0.0524532	0.0119899
ENSG00000088930	0.0659379	0.0274044
ENSG00000089022	0.051975	0.0299415
ENSG00000089041	0.0466008	0.0349385
ENSG00000089048	0.0581876	0.0376763
ENSG00000089057	0.118716	0.0117651
ENSG00000089094	0.0719442	0.0387979
ENSG00000089154	0.0350086	0.0293954
ENSG00000089177	0.0813712	0.0441652
ENSG00000089682	0.0887689	0.00445467
ENSG00000089775	0.0445594	0.0303528
ENSG00000089902	0.0473685	0.0397014
ENSG00000090060	0.104893	0.0186747
ENSG00000090061	0.026287	0.0482362
ENSG00000090447	0.0286023	0.0100583
ENSG00000090487	0.0269826	0.0334803
ENSG00000090565	0.0806019	0.0415484
ENSG00000090581	0.0578768	0.00594624
ENSG00000090615	0.0530645	0.0397014
ENSG00000090661	0.136329	0.00218563
ENSG00000090686	0.11265	0.0069799
ENSG00000090905	0.14476	0.0258841
ENSG00000090975	0.0805089	0.0184243
ENSG00000091039	0.165176	0.00783389
ENSG00000091127	0.0497643	0.0351974
ENSG00000091129	0.135329	0.0158013
ENSG00000091428	0.120631	0.0356181
ENSG00000091490	0.0980529	0.0172624
ENSG00000091622	0.0628012	0.0276794
ENSG00000092051	0.0934446	0.0235697
ENSG00000092148	0.0741214	0.0321639
ENSG00000092199	0.110701	0.00919105
ENSG00000092201	0.0584876	0.0143468
ENSG00000092421	0.125014	0.0091833
ENSG00000092439	0.110072	0.00919105
ENSG00000092871	0.0901214	0.0105356
ENSG00000092931	0.104983	0.00602267
ENSG00000092964	0.0939206	0.0427011
ENSG00000093144	0.0465485	0.0233037
ENSG00000093167	0.100162	0.02591
ENSG00000094841	0.0296118	0.0283568
ENSG00000094880	0.0459589	0.00272111
ENSG00000095002	0.111857	0.00807169
ENSG00000095203	0.0717773	0.0296717
ENSG00000095261	0.0453391	0.0311762
ENSG00000095319	0.0306791	0.0410583
ENSG00000095574	0.0352259	0.0314792
ENSG00000095587	0.0550659	0.0196825
ENSG00000095787	0.0964296	0.0164877
ENSG00000095951	0.0646016	0.0452172
ENSG00000096060	0.0373524	0.0367633
ENSG00000096063	0.0905466	0.00624628
ENSG00000096093	0.0683772	0.00602267
ENSG00000096968	0.0874953	0.0498845
ENSG00000099204	0.145786	0.0208279
ENSG00000099246	0.0646069	0.0225483
ENSG00000099284	0.0651352	0.0107509
ENSG00000099331	0.0875167	0.00670912
ENSG00000099810	0.0590333	0.0267036
ENSG00000099968	0.0628343	0.0250646
ENSG00000100003	0.0236645	0.0333723
ENSG00000100014	0.143179	0.0369299
ENSG00000100027	0.104808	0.00313592
ENSG00000100028	0.0350604	0.045982
ENSG00000100036	0.0268961	0.0293337
ENSG00000100095	0.0909054	0.02731
ENSG00000100142	0.0820984	0.00624667
ENSG00000100150	0.0765129	0.0179637
ENSG00000100154	0.114997	0.0266151
ENSG00000100207	0.107685	0.0172624
ENSG00000100239	0.125927	0.00554881
ENSG00000100271	0.0385344	0.0155413
ENSG00000100296	0.042127	0.014553
ENSG00000100320	0.120615	0.0229485
ENSG00000100325	0.0506046	0.00602267
ENSG00000100330	0.0644306	0.046012
ENSG00000100346	0.0414519	0.0111105
ENSG00000100354	0.128947	0.0239183
ENSG00000100376	0.050756	0.00565821
ENSG00000100393	0.0897621	0.0191752
ENSG00000100425	0.0506875	0.0225483
ENSG00000100426	0.0462332	0.0113158
ENSG00000100433	0.100684	0.00218563
ENSG00000100478	0.0997896	0.0067852
ENSG00000100485	0.0821454	0.0307579
ENSG00000100490	0.0927417	0.00530595
ENSG00000100503	0.107928	0.0247544
ENSG00000100568	0.051416	0.0184129
ENSG00000100575	0.0329246	0.0245458
ENSG00000100605	0.0794106	0.00618076
ENSG00000100629	0.0803218	0.0107062
ENSG00000100714	0.0397156	0.0115259
ENSG00000100722	0.0765359	0.022333
ENSG00000100731	0.127391	0.0130597
ENSG00000100784	0.134957	0.00313592
ENSG00000100796	0.0664126	0.0234795
ENSG00000100815	0.0800627	0.0145309
ENSG00000100865	0.0339893	0.0164877
ENSG00000100888	0.0655577	0.02731
ENSG00000100890	0.0848766	0.0193033
ENSG00000100902	0.077734	0.0191455
ENSG00000100916	0.062026	0.00899031
ENSG00000101004	0.0647459	0.0190878
ENSG00000101040	0.157256	0.00366924
ENSG00000101052	0.0629145	0.010627
ENSG00000101152	0.0692574	0.0122141
ENSG00000101161	0.0500389	0.0201516
ENSG00000101190	0.0358625	0.0159818
ENSG00000101191	0.0650926	0.0333646
ENSG00000101224	0.0754159	0.0053495
ENSG00000101298	0.0575471	0.00803019
ENSG00000101333	0.17578	0.00287773
ENSG00000101337	0.0484618	0.0423026
ENSG00000101347	0.0357551	0.00602267
ENSG00000101349	0.114349	0.0327562
ENSG00000101350	0.0673315	0.0232832
ENSG00000101353	0.0737448	0.00510567
ENSG00000101460	-0.0817991	0.0187361
ENSG00000101489	0.158739	0.0080428
ENSG00000101493	0.0549652	0.0346876
ENSG00000101546	0.0291851	0.0296717
ENSG00000101574	0.0545566	0.00530595
ENSG00000101596	0.0887868	0.0424736
ENSG00000101745	0.153487	0.00837154
ENSG00000101746	0.134191	0.0125234
ENSG00000101752	0.0927785	0.0407546
ENSG00000101844	0.0200102	0.0364456
ENSG00000101849	0.0518686	0.0412786
ENSG00000101868	0.137573	0.00503215
ENSG00000101871	0.10217	0.00944288
ENSG00000101901	0.0790522	0.0183938
ENSG00000101935	0.16718	0.00272111
ENSG00000101958	0.093122	0.0146479
ENSG00000101966	0.072737	0.0161653
ENSG00000101972	0.117045	0.00686436
ENSG00000102038	0.0718891	0.0278683
ENSG00000102078	0.03198	0.0227966
ENSG00000102098	0.0464324	0.0072039
ENSG00000102189	0.0771687	0.02731
ENSG00000102230	0.04105	0.0091833
ENSG00000102290	0.246606	0.00624628
ENSG00000102383	0.0364435	0.0273153
ENSG00000102466	0.21065	0.00414028
ENSG00000102524	0.0439283	0.0156973
ENSG00000102547	0.0495038	0.0404887
ENSG00000102753	0.0602543	0.043437
ENSG00000102763	0.104424	0.0404478
ENSG00000102858	0.0689407	0.00944288
ENSG00000102900	0.0894271	0.0223618
ENSG00000102908	0.0822962	0.0493321
ENSG00000102921	0.0873621	0.00633903
ENSG00000102974	0.0491453	0.0377165
ENSG00000103047	0.114599	0.00686436
ENSG00000103051	0.0389666	0.0119118
ENSG00000103091	0.0823003	0.0256432
ENSG00000103184	0.0314856	0.0407534
ENSG00000103194	0.0741289	0.00984544
ENSG00000103222	0.0775713	0.00686436
ENSG00000103227	0.0476984	0.0318323
ENSG00000103248	0.0243942	0.0238544
ENSG00000103365	0.0883259	0.0193033
ENSG00000103381	0.0412196	0.00689265
ENSG00000103479	0.0688398	0.021291
ENSG00000103489	0.133552	0.0232832
ENSG00000103494	0.0487036	0.0308405
ENSG00000103544	0.0784298	0.0293337
ENSG00000103647	0.0986353	0.0315839
ENSG00000103671	0.0621098	0.00924847
ENSG00000103942	0.0633692	0.00218563
ENSG00000104044	0.113528	0.00456908
ENSG00000104047	0.0802209	0.0105356
ENSG00000104064	0.0403066	0.0422374
ENSG00000104067	0.143583	0.00801457
ENSG00000104093	0.0901255	0.0475221
ENSG00000104133	0.0777558	0.025262
ENSG00000104218	0.0835135	0.0430861
ENSG00000104320	0.0590166	0.0315087
ENSG00000104361	0.0641367	0.00803019
ENSG00000104365	0.0343652	0.0465659
ENSG00000104381	0.116388	0.0276794
ENSG00000104427	0.0740206	0.0143632
ENSG00000104450	0.0408015	0.0288158
ENSG00000104490	0.135726	0.0327753
ENSG00000104517	0.140844	0.0130597
ENSG00000104687	0.0580881	0.0358686
ENSG00000104723	0.101698	0.0394008
ENSG00000104728	0.0370856	0.0347331
ENSG00000104731	0.0457461	0.0180837
ENSG00000104765	0.100414	0.0083987
ENSG00000104880	0.045651	0.0322375
ENSG00000104885	0.0252386	0.0265218
ENSG00000104973	0.0311082	0.0470342
ENSG00000105072	0.0300312	0.0111105
ENSG00000105085	0.032373	0.00602267
ENSG00000105186	0.0562393	0.00602267
ENSG00000105197	0.0261314	0.0192616
ENSG00000105220	0.146612	0.01049
ENSG00000105221	0.0521204	0.0334017
ENSG00000105323	0.0434448	0.0398935
ENSG00000105499	0.10523	0.0127821
ENSG00000105514	0.0233575	0.0154585
ENSG00000105605	0.0668545	0.0362479
ENSG00000105662	0.0778257	0.011668
ENSG00000105676	0.018718	0.0348846
ENSG00000105705	0.043497	0.0223469
ENSG00000105717	0.0530037	0.00686757
ENSG00000105737	0.0613433	0.0287943
ENSG00000105778	0.085415	0.0327753
ENSG00000105784	0.124413	0.019393
ENSG00000105793	0.0466588	0.0413571
ENSG00000105821	0.0389216	0.0220939
ENSG00000105866	0.0698064	0.0067852
ENSG00000105948	0.0555628	0.0367633
ENSG00000106049	0.0868956	0.0181847
ENSG00000106070	0.106465	0.010627
ENSG00000106078	0.0733721	0.0117973
ENSG00000106125	0.0804899	0.00614259
ENSG00000106144	0.0240338	0.0367633
ENSG00000106266	0.0396523	0.0386344
ENSG00000106392	0.0484263	0.04197
ENSG00000106415	0.133078	0.0123969
ENSG00000106443	0.128321	0.0161759
ENSG00000106459	0.0820595	0.0328119
ENSG00000106526	0.0512055	0.00365981
ENSG00000106536	0.0638788	0.00899031
ENSG00000106546	0.106009	0.0431047
ENSG00000106554	0.0778026	0.0477656
ENSG00000106605	0.0314668	0.0343763
ENSG00000106617	0.130872	0.00803019
ENSG00000106686	0.102523	0.00984544
ENSG00000106701	0.0772266	0.0172624
ENSG00000106733	0.0673876	0.00271207
ENSG00000106772	0.0949985	0.00803019
ENSG00000106789	0.050039	0.00313592
ENSG00000106868	0.0784492	0.00908998
ENSG00000107164	0.0756922	0.0217278
ENSG00000107249	0.0738022	0.0366015
ENSG00000107263	0.0955772	0.0143166
ENSG00000107282	0.0977609	0.0408834
ENSG00000107338	0.0473046	0.00271207
ENSG00000107341	0.132195	0.00287773
ENSG00000107518	0.185237	0.0218587
ENSG00000107521	0.0238417	0.036202
ENSG00000107554	0.0652925	0.0143468
ENSG00000107560	0.0558662	0.0412304
ENSG00000107566	0.0350437	0.0292086
ENSG00000107611	0.0396256	0.0112509
ENSG00000107614	0.0520448	0.0092242
ENSG00000107625	0.0504258	0.0386911
ENSG00000107643	0.100228	0.0314054
ENSG00000107651	0.0452405	0.0265159
ENSG00000107679	0.0922484	0.0477043
ENSG00000107745	0.083442	0.0480689
ENSG00000107779	0.102264	0.010627
ENSG00000107829	0.0853802	0.0219801
ENSG00000107854	0.076052	0.0270528
ENSG00000107863	0.111371	0.0171177
ENSG00000107882	0.0630286	0.0241384
ENSG00000107938	0.050488	0.0225053
ENSG00000108010	0.0490127	0.0336527
ENSG00000108061	0.0736401	0.025262
ENSG00000108091	0.0783585	0.0318239
ENSG00000108175	0.0778138	0.00865236
ENSG00000108176	0.0268239	0.0456487
ENSG00000108219	0.0353958	0.0231783
ENSG00000108306	0.139516	0.00618076
ENSG00000108370	0.0551433	0.00313592
ENSG00000108384	0.0316313	0.0452172
ENSG00000108395	0.0809582	0.0486461
ENSG00000108423	0.0392924	0.0215618
ENSG00000108439	-0.0256673	0.0295354
ENSG00000108468	0.0459179	0.0351974
ENSG00000108474	0.0939478	0.0144365
ENSG00000108506	0.0465255	0.0250646
ENSG00000108641	0.0504647	0.00603845
ENSG00000108651	0.0365642	0.0348965
ENSG00000108669	0.1061	0.00787434
ENSG00000108684	0.195161	0.0106271
ENSG00000108799	0.0784296	0.00787434
ENSG00000108854	0.0673273	0.0221343
ENSG00000108984	0.0903135	0.00971894
ENSG00000109016	0.0600305	0.0293954
ENSG00000109103	0.0320823	0.00739816
ENSG00000109118	0.0469457	0.0269749
ENSG00000109323	0.100094	0.00686436
ENSG00000109339	0.156219	0.0152881
ENSG00000109452	0.150219	0.0197534
ENSG00000109458	0.114139	0.0177747
ENSG00000109654	0.0992114	0.0394511
ENSG00000109680	0.0883564	0.0250322
ENSG00000109685	0.0769073	0.0471344
ENSG00000109686	0.0762039	0.0180837
ENSG00000109756	0.104984	0.0411665
ENSG00000109906	0.121901	0.0341495
ENSG00000109911	0.090464	0.0305905
ENSG00000109927	0.0232609	0.0243059
ENSG00000109944	0.0810507	0.00271207
ENSG00000110063	0.0227534	0.0241384
ENSG00000110075	0.0873698	0.0452172
ENSG00000110076	0.0923643	0.0119698
ENSG00000110318	0.139333	0.00287773
ENSG00000110330	0.0392548	0.0399728
ENSG00000110395	0.0814152	0.00874142
ENSG00000110400	0.0363882	0.0119118
ENSG00000110422	0.0609356	0.0299081
ENSG00000110435	0.09317	0.0101274
ENSG00000110497	0.10063	0.0130597
ENSG00000110514	0.0513318	0.0378676
ENSG00000110651	-0.0875863	0.00479941
ENSG00000110675	0.0882797	0.0278683
ENSG00000110713	0.0982155	0.00462863
ENSG00000110756	0.0488284	0.0067852
ENSG00000110801	0.0494858	0.00602267
ENSG00000110841	0.0795815	0.049545
ENSG00000110851	0.0289411	0.0305708
ENSG00000110880	0.0797863	0.00997513
ENSG00000111110	0.083592	0.0270528
ENSG00000111186	0.0295596	0.0317322
ENSG00000111203	0.0465243	0.02476
ENSG00000111252	0.0463961	0.00337384
ENSG00000111271	0.0540545	0.00382299
ENSG00000111275	0.0509609	0.0172624
ENSG00000111300	0.0767068	0.02731
ENSG00000111554	0.0347257	0.010627
ENSG00000111581	0.0492841	0.0130597
ENSG00000111605	0.115205	0.0198398
ENSG00000111696	0.0739006	0.00919105
ENSG00000111728	0.127041	0.0138517
ENSG00000111731	0.108932	0.0405206
ENSG00000111880	0.0887638	0.0414768
ENSG00000111912	0.0771342	0.0355811
ENSG00000111961	0.145732	0.00984544
ENSG00000112033	0.0404993	0.0126686
ENSG00000112062	0.111799	0.00967781
ENSG00000112079	0.0629922	0.00740398
ENSG00000112137	0.160053	0.0179109
ENSG00000112144	0.0444141	0.0408098
ENSG00000112159	0.081343	0.0374502
ENSG00000112232	0.226184	0.00821758
ENSG00000112305	0.107163	0.0114268
ENSG00000112309	0.147731	0.00143665
ENSG00000112339	0.0805468	0.00836194
ENSG00000112367	0.0776351	0.00857874
ENSG00000112414	0.0667067	0.0143468
ENSG00000112419	0.159787	0.0108905
ENSG00000112530	0.163575	0.0146479
ENSG00000112531	0.123624	0.0338488
ENSG00000112576	0.0654546	0.0231783
ENSG00000112584	0.0993991	0.0222635
ENSG00000112592	0.0327046	0.00704556
ENSG00000112624	0.115755	0.0227107
ENSG00000112685	0.119181	0.00570752
ENSG00000112699	0.0985834	0.0306724
ENSG00000112701	0.108809	0.0286219
ENSG00000112739	0.102026	0.0419818
ENSG00000112787	0.0404082	0.0408054
ENSG00000112851	0.0968274	0.0208279
ENSG00000112941	0.0693076	0.0150246
ENSG00000112964	0.157664	0.00576857
ENSG00000112981	0.107573	0.00455389
ENSG00000112996	0.0388541	0.0148234
ENSG00000113194	0.0528548	0.044939
ENSG00000113269	0.120069	0.0117137
ENSG00000113300	0.0756645	0.00337384
ENSG00000113318	0.090408	0.0288158
ENSG00000113356	0.0379023	0.015496
ENSG00000113360	0.0755811	0.0116918
ENSG00000113396	0.182357	0.00530595
ENSG00000113448	0.149969	0.0396923
ENSG00000113494	0.0793892	0.00636375
ENSG00000113569	0.0315213	0.0457862
ENSG00000113593	0.0591568	0.0241974
ENSG00000113643	0.0623405	0.0318586
ENSG00000113649	0.0753252	0.042121
ENSG00000113719	0.0944147	0.00800513
ENSG00000113732	0.0525292	0.0075453
ENSG00000113742	0.0941863	0.0318087
ENSG00000113761	0.0993882	0.00558816
ENSG00000113805	0.20802	0.00467827
ENSG00000113851	0.0760408	0.0184191
ENSG00000113966	0.0663783	0.0210686
ENSG00000113971	0.0943825	0.00816261
ENSG00000114026	0.0341534	0.0118865
ENSG00000114054	0.0482956	0.0414768
ENSG00000114107	0.0990332	0.00680964
ENSG00000114126	0.112876	0.0254043
ENSG00000114127	0.1411	0.00570752
ENSG00000114279	0.178244	0.00936919
ENSG00000114302	0.0718147	0.0474529
ENSG00000114331	0.0845391	0.0311762
ENSG00000114423	0.0921363	0.0347361
ENSG00000114446	0.03578	0.0426234
ENSG00000114520	0.0694532	0.0208279
ENSG00000114670	0.069144	0.0327978
ENSG00000114739	0.0657968	0.00586764
ENSG00000114805	0.159557	0.0161759
ENSG00000114861	0.110939	0.0299081
ENSG00000114904	0.0545971	0.0311369
ENSG00000114988	0.0589474	0.00272111
ENSG00000114999	0.0485359	0.028952
ENSG00000115053	0.0407762	0.0433278
ENSG00000115084	0.0909395	0.00924847
ENSG00000115109	0.0821183	0.0455571
ENSG00000115155	0.0656689	0.0286322
ENSG00000115183	0.091596	0.0386344
ENSG00000115233	0.0664918	0.0394511
ENSG00000115234	-0.0228726	0.0322482
ENSG00000115239	0.184437	0.0418548
ENSG00000115252	0.229726	0.0035634
ENSG00000115306	0.0971468	0.0428783
ENSG00000115392	0.0854211	0.0339469
ENSG00000115421	0.0390727	0.0402043
ENSG00000115423	0.0942226	0.00218563
ENSG00000115464	0.134114	0.0146479
ENSG00000115504	0.106914	0.0405906
ENSG00000115616	0.0677185	0.0428538
ENSG00000115750	0.0575132	0.00843359
ENSG00000115761	0.0812814	0.00937588
ENSG00000115839	0.0743577	0.0471775
ENSG00000115840	0.164265	0.00602267
ENSG00000115904	0.156442	0.00783519
ENSG00000115970	0.101984	0.00787434
ENSG00000115998	0.039837	0.00313592
ENSG00000116001	0.0903379	0.0179637
ENSG00000116120	0.0714215	0.0269083
ENSG00000116127	0.0806197	0.025183
ENSG00000116141	0.102589	0.0347361
ENSG00000116191	0.160891	0.00272111
ENSG00000116199	0.0510106	0.0293337
ENSG00000116266	0.0503437	0.028952
ENSG00000116299	0.106672	0.0354177
ENSG00000116329	0.102347	0.0073466
ENSG00000116497	0.0471024	0.0457862
ENSG00000116539	0.135464	0.0117228
ENSG00000116641	0.116715	0.00803019
ENSG00000116649	-0.0363465	0.0351974
ENSG00000116667	0.0997055	0.0225954
ENSG00000116668	0.0719771	0.00586764
ENSG00000116678	0.0645939	0.0389133
ENSG00000116731	0.0967301	0.0177747
ENSG00000116783	0.106546	0.0271937
ENSG00000116830	0.0428586	0.00803019
ENSG00000116852	0.0554623	0.00365981
ENSG00000116885	0.0292189	0.0170226
ENSG00000117013	0.0289779	0.0450346
ENSG00000117020	0.158878	0.0072456
ENSG00000117054	0.0646839	0.0215325
ENSG00000117069	0.155346	0.0331088
ENSG00000117152	-0.0872345	0.0329499
ENSG00000117154	0.0824844	0.00554881
ENSG00000117174	0.0462577	0.0364456
ENSG00000117222	0.03252	0.0267036
ENSG00000117335	0.0694453	0.0305905
ENSG00000117360	0.0472714	0.0274044
ENSG00000117385	0.0297413	0.0322859
ENSG00000117419	0.0870028	0.00900273
ENSG00000117461	0.0642755	0.0453791
ENSG00000117523	0.140159	0.00414028
ENSG00000117528	0.0457499	0.0493321
ENSG00000117533	0.0454589	0.0265343
ENSG00000117569	0.0962695	0.0220226
ENSG00000117597	0.0279658	0.022333
ENSG00000117602	0.0464017	0.033895
ENSG00000117620	0.0661631	0.0221343
ENSG00000117625	0.0898552	0.023648
ENSG00000117643	0.0734736	0.0361223
ENSG00000117697	0.0834542	0.0122141
ENSG00000117859	0.132538	0.00803019
ENSG00000118007	0.154246	0.00602267
ENSG00000118058	0.106836	0.0343523
ENSG00000118217	0.093404	0.00731979
ENSG00000118242	0.0461351	0.0149007
ENSG00000118246	0.0602308	0.0250646
ENSG00000118260	0.0687731	0.0296717
ENSG00000118307	0.0438784	0.0459233
ENSG00000118412	0.0466345	0.0435576
ENSG00000118432	0.0680254	0.0298252
ENSG00000118454	0.117734	0.0110853
ENSG00000118482	0.123967	0.00914087
ENSG00000118507	0.0833225	0.0327718
ENSG00000118564	0.0922859	0.0114625
ENSG00000118579	0.0556629	0.0373672
ENSG00000118690	0.0692973	0.039991
ENSG00000118733	0.0951085	0.0425419
ENSG00000118960	0.0596781	0.00603845
ENSG00000118965	0.0382584	0.0314455
ENSG00000119004	0.0444985	0.0399874
ENSG00000119041	0.0421833	0.0309973
ENSG00000119042	0.0274115	0.0382207
ENSG00000119125	0.105143	0.00586764
ENSG00000119139	0.0546268	0.00661253
ENSG00000119231	0.0824414	0.0191167
ENSG00000119392	0.0322217	0.0433529
ENSG00000119402	0.0574769	0.0146242
ENSG00000119509	0.0871473	0.0445546
ENSG00000119522	0.100529	0.0396727
ENSG00000119636	0.0366601	0.0222635
ENSG00000119661	0.037924	0.0400445
ENSG00000119685	0.108264	0.00855848
ENSG00000119698	0.159503	0.00490858
ENSG00000119725	0.043234	0.0492224
ENSG00000119771	0.197465	0.00396607
ENSG00000119772	0.147113	0.00232613
ENSG00000119820	0.0890976	0.00615878
ENSG00000119865	0.060895	0.0242994
ENSG00000119899	0.0870039	0.00602267
ENSG00000119906	0.0745007	0.016672
ENSG00000120029	0.0949297	0.0265343
ENSG00000120049	0.0530943	0.0189521
ENSG00000120071	0.144606	0.0179272
ENSG00000120088	0.0371565	0.0073466
ENSG00000120137	0.0537687	0.0380223
ENSG00000120158	0.0511323	0.0385044
ENSG00000120437	0.0278888	0.0477656
ENSG00000120457	0.0317063	0.0418548
ENSG00000120526	0.0508958	0.0141442
ENSG00000120549	0.144244	0.0331088
ENSG00000120594	0.103571	0.0219896
ENSG00000120616	0.0851782	0.0311762
ENSG00000120658	0.146916	0.0366015
ENSG00000120697	0.0438447	0.0219506
ENSG00000120725	0.0902182	0.0194717
ENSG00000120784	0.0774454	0.00272111
ENSG00000120910	0.0962214	0.01137
ENSG00000120963	0.0748017	0.0293337
ENSG00000121022	0.0315874	0.0378876
ENSG00000121067	0.0739609	0.0225483
ENSG00000121210	0.0727902	0.0387847
ENSG00000121289	0.0625646	0.00674634
ENSG00000121297	0.139908	0.0157475
ENSG00000121440	0.14161	0.0328119
ENSG00000121481	0.04008	0.0393373
ENSG00000121542	0.0771932	0.0105096
ENSG00000121749	0.0642006	0.047091
ENSG00000121775	0.0404879	0.0182757
ENSG00000121871	0.0689122	0.00586764
ENSG00000121879	0.0888426	0.0397014
ENSG00000121892	0.169749	0.00218563
ENSG00000121897	0.04466	0.0150517
ENSG00000121904	0.11185	0.0436755
ENSG00000121940	0.0520354	0.00510567
ENSG00000121988	0.0723481	0.0247544
ENSG00000121989	0.105071	0.00733104
ENSG00000122008	0.086359	0.0128343
ENSG00000122025	0.0963718	0.0344196
ENSG00000122257	0.0680266	0.0443499
ENSG00000122299	0.0673491	0.0110381
ENSG00000122417	0.0877037	0.0367633
ENSG00000122482	0.0904768	0.0255413
ENSG00000122483	0.0300527	0.0295145
ENSG00000122484	0.108173	0.0161653
ENSG00000122507	0.163416	0.00844392
ENSG00000122550	0.0779871	0.025262
ENSG00000122584	0.170425	0.0184129
ENSG00000122696	0.0444519	0.0387365
ENSG00000122707	0.0662904	0.0321368
ENSG00000122778	0.0842854	0.0143632
ENSG00000122779	0.0594733	0.0377165
ENSG00000122870	0.16379	0.00366924
ENSG00000122882	0.0439208	0.02731
ENSG00000122884	0.0694439	0.021198
ENSG00000122912	0.0740396	0.0187273
ENSG00000122958	0.0522836	0.0181538
ENSG00000122965	0.0423398	0.0125995
ENSG00000122970	0.0586581	0.0332393
ENSG00000123066	0.144871	0.00924847
ENSG00000123119	0.062079	0.0322202
ENSG00000123130	0.0434054	0.00984544
ENSG00000123178	0.0323346	0.0459021
ENSG00000123200	0.0763467	0.0295275
ENSG00000123213	0.06003	0.0270682
ENSG00000123240	0.0617203	0.0157475
ENSG00000123268	0.0768452	0.00803019
ENSG00000123352	0.0878101	0.00841815
ENSG00000123552	0.095582	0.00218563
ENSG00000123607	0.0933494	0.0251883
ENSG00000123636	0.0955432	0.0466493
ENSG00000123643	0.0788977	0.0170351
ENSG00000123737	0.0214003	0.0250646
ENSG00000124151	0.0616222	0.0259519
ENSG00000124193	0.0561899	0.0128551
ENSG00000124214	0.0576976	0.0430068
ENSG00000124215	0.0276872	0.0399728
ENSG00000124243	0.0582034	0.0103002
ENSG00000124299	0.0372321	0.0218161
ENSG00000124313	0.0703851	0.0111105
ENSG00000124406	0.148928	0.0125234
ENSG00000124486	0.107195	0.0117137
ENSG00000124493	0.0402124	0.0459299
ENSG00000124496	0.112421	0.0292281
ENSG00000124507	0.0728968	0.0222074
ENSG00000124749	0.0797821	0.0366794
ENSG00000124789	0.0633415	0.0351974
ENSG00000124795	0.0375677	0.0497902
ENSG00000124813	0.136334	0.00524042
ENSG00000125107	0.0577636	0.0428858
ENSG00000125124	0.0578987	0.0322859
ENSG00000125257	0.0304673	0.0394511
ENSG00000125354	0.0941406	0.0491144
ENSG00000125386	0.11693	0.0071573
ENSG00000125450	0.0312056	0.0491144
ENSG00000125485	0.0276517	0.0495968
ENSG00000125630	0.0212108	0.0404641
ENSG00000125675	0.213867	0.00803019
ENSG00000125686	0.0343408	0.0351974
ENSG00000125755	0.0738352	0.00787434
ENSG00000125818	0.0649217	0.0101878
ENSG00000125821	0.114734	0.0305905
ENSG00000125834	0.0405176	0.0213811
ENSG00000125846	0.0764351	0.0191455
ENSG00000125952	0.06232	0.0299527
ENSG00000125970	0.0591031	0.0117228
ENSG00000125977	0.0376617	0.0382295
ENSG00000126001	0.0798833	0.00365981
ENSG00000126070	0.100756	0.0215592
ENSG00000126091	0.149206	0.0267036
ENSG00000126216	0.0763332	0.0189082
ENSG00000126217	0.10472	0.00931555
ENSG00000126226	0.0494118	0.0327753
ENSG00000126464	0.0400231	0.0443195
ENSG00000126602	0.0681676	0.0377165
ENSG00000126705	0.0611095	0.0130744
ENSG00000126733	0.0722836	0.00337384
ENSG00000126767	0.0256228	0.0185097
ENSG00000126790	0.0301635	0.0410022
ENSG00000126804	0.0726837	0.025262
ENSG00000126858	0.0900779	0.0200301
ENSG00000126970	0.0907833	0.00524042
ENSG00000127124	0.122983	0.0394894
ENSG00000127481	0.098728	0.00934556
ENSG00000127483	0.0838977	0.0360395
ENSG00000127603	0.117665	0.0439777
ENSG00000127616	0.0789042	0.0387847
ENSG00000127804	0.0666933	0.011981
ENSG00000127914	0.133622	0.00787434
ENSG00000127922	0.120495	0.00757975
ENSG00000127947	0.0676211	0.0377165
ENSG00000127948	0.0617263	0.00456908
ENSG00000127952	0.047137	0.00530595
ENSG00000127990	0.0869878	0.0184191
ENSG00000127993	0.0382181	0.0293337
ENSG00000128059	0.0317475	0.0405946
ENSG00000128268	0.0473976	0.0493042
ENSG00000128335	0.0257808	0.0293337
ENSG00000128487	0.113775	0.0192382
ENSG00000128512	0.140996	0.0147665
ENSG00000128513	0.0724458	0.0146945
ENSG00000128564	-0.164181	0.000881797
ENSG00000128585	0.146896	0.00962689
ENSG00000128590	-0.0220918	0.0399728
ENSG00000128606	0.0223431	0.0396727
ENSG00000128739	0.132021	0.035939
ENSG00000128881	0.0993024	0.0343523
ENSG00000128891	0.046615	0.0261973
ENSG00000128908	0.0842828	0.0123512
ENSG00000128915	0.0546136	0.0493321
ENSG00000128923	0.0787717	0.0301603
ENSG00000129003	0.137878	0.0188257
ENSG00000129116	0.117933	0.0171842
ENSG00000129250	0.0525247	0.00218563
ENSG00000129295	0.11711	0.0387847
ENSG00000129315	0.0342163	0.0327978
ENSG00000129515	0.0830505	0.00602267
ENSG00000129518	0.0441486	0.0390279
ENSG00000129595	0.178825	0.00602267
ENSG00000129646	0.0641086	0.00482729
ENSG00000129657	0.0725456	0.0414768
ENSG00000129993	0.0334327	0.00510567
ENSG00000130021	0.072697	0.0396727
ENSG00000130023	0.0289277	0.0369208
ENSG00000130032	0.0342428	0.0298074
ENSG00000130119	0.02967	0.0164171
ENSG00000130177	0.0577651	0.025262
ENSG00000130224	0.0834377	0.00624628
ENSG00000130226	0.153299	0.028684
ENSG00000130227	0.0708567	0.0376832
ENSG00000130287	0.0367673	0.0212165
ENSG00000130309	0.0255092	0.0387111
ENSG00000130347	0.0340676	0.0459021
ENSG00000130363	0.0453542	0.0441652
ENSG00000130396	0.0912745	0.0270528
ENSG00000130402	0.0589606	0.0308405
ENSG00000130449	0.119762	0.0234077
ENSG00000130517	0.0439892	0.00570752
ENSG00000130638	0.115803	0.00957267
ENSG00000130653	0.0779913	0.0130597
ENSG00000130699	0.0606167	0.00945564
ENSG00000130713	0.0230822	0.0185543
ENSG00000130749	0.0300841	0.0441652
ENSG00000130751	0.0963141	0.0101943
ENSG00000130783	0.0472392	0.00232613
ENSG00000130856	0.0696765	0.00530595
ENSG00000130956	0.0605499	0.0348965
ENSG00000130962	0.054493	0.00919105
ENSG00000131013	0.058383	0.0165758
ENSG00000131018	0.176739	0.00554881
ENSG00000131023	0.105019	0.00272111
ENSG00000131069	0.0334592	0.0398935
ENSG00000131089	0.0906747	0.0225954
ENSG00000131115	0.0278857	0.0412009
ENSG00000131127	0.0733345	0.0067852
ENSG00000131149	0.0754806	0.0288158
ENSG00000131171	0.0812285	0.0478753
ENSG00000131242	0.0765118	0.0376992
ENSG00000131373	0.0588977	0.0457607
ENSG00000131374	0.166139	0.00668284
ENSG00000131375	0.0774086	0.0257594
ENSG00000131389	0.0479064	0.0169032
ENSG00000131398	0.0386138	0.0183971
ENSG00000131409	0.0772342	0.0304968
ENSG00000131459	0.0586473	0.00614259
ENSG00000131504	0.0652053	0.0221343
ENSG00000131558	0.117258	0.02848
ENSG00000131591	0.0461556	0.0401454
ENSG00000131697	0.0716243	0.0130597
ENSG00000131725	0.0869939	0.00313592
ENSG00000131831	0.0519345	0.0273969
ENSG00000131848	0.049178	0.0493321
ENSG00000131943	0.0513301	0.0311762
ENSG00000131966	0.0585718	0.0288158
ENSG00000132005	0.0608976	0.00931555
ENSG00000132153	0.0551274	0.0440289
ENSG00000132170	0.122976	0.00653528
ENSG00000132182	0.0473341	0.0322859
ENSG00000132321	0.0481868	0.0067852
ENSG00000132329	0.0325772	0.0412402
ENSG00000132356	0.0387237	0.0478818
ENSG00000132359	0.119615	0.010627
ENSG00000132388	0.0620381	0.0445546
ENSG00000132478	0.0610303	0.0189082
ENSG00000132549	0.133652	0.015486
ENSG00000132600	0.0569771	0.0244405
ENSG00000132670	0.138322	0.0072456
ENSG00000132740	0.0248575	0.0220546
ENSG00000132842	0.0638769	0.0328119
ENSG00000132932	0.138755	0.0268987
ENSG00000132938	0.155635	0.0296717
ENSG00000132953	0.0677972	0.0416072
ENSG00000132964	0.0963359	0.0418974
ENSG00000133019	0.136084	0.0401182
ENSG00000133030	0.0949963	0.0128551
ENSG00000133056	0.0660821	0.00717815
ENSG00000133135	0.032329	0.0293954
ENSG00000133195	0.050988	0.0173536
ENSG00000133216	0.0598173	0.0426234
ENSG00000133226	0.0587976	0.0308405
ENSG00000133243	0.0562351	0.0168305
ENSG00000133315	0.0463501	0.0412009
ENSG00000133393	0.0375607	0.0175634
ENSG00000133401	0.105942	0.00456908
ENSG00000133422	0.0275112	0.0421763
ENSG00000133424	0.150573	0.0241966
ENSG00000133612	0.0642752	0.0390851
ENSG00000133687	0.135701	0.0258503
ENSG00000133704	0.0493714	0.0311762
ENSG00000133706	0.113343	0.0303374
ENSG00000133818	0.0947443	0.00337384
ENSG00000133858	0.0945116	0.00900273
ENSG00000133943	0.0788947	0.00919105
ENSG00000133961	0.0699895	0.0388387
ENSG00000134030	0.129067	0.0111105
ENSG00000134070	0.0268323	0.039937
ENSG00000134086	0.0311218	0.0268987
ENSG00000134121	0.140444	0.0246388
ENSG00000134247	0.0278111	0.028004
ENSG00000134265	0.0527175	0.0359619
ENSG00000134278	0.0997236	0.0477656
ENSG00000134283	0.0902705	0.0266216
ENSG00000134371	0.0656456	0.0399728
ENSG00000134376	0.125782	0.0282887
ENSG00000134452	0.0528067	0.0146945
ENSG00000134461	0.0658317	0.0183322
ENSG00000134508	0.096992	0.0227359
ENSG00000134533	0.0918172	0.0434188
ENSG00000134539	0.0389642	0.0396727
ENSG00000134627	0.0388465	0.0190797
ENSG00000134744	0.133352	0.0072644
ENSG00000134758	0.0693662	0.00686436
ENSG00000134775	0.11852	0.0260461
ENSG00000134815	0.035209	0.0222288
ENSG00000134852	0.0937254	0.0367535
ENSG00000134882	0.106394	0.0157034
ENSG00000134897	0.0814858	0.0197893
ENSG00000134900	0.0865897	0.0152359
ENSG00000134909	0.145107	0.0147946
ENSG00000134982	0.125746	0.0241674
ENSG00000135040	0.0886809	0.0120047
ENSG00000135049	0.107537	0.0203789
ENSG00000135052	0.0761545	0.00851983
ENSG00000135074	0.0512158	0.0194592
ENSG00000135077	0.0400171	0.0242657
ENSG00000135083	0.0841803	0.00624628
ENSG00000135090	0.0947922	0.0338022
ENSG00000135144	0.0442813	0.0128665
ENSG00000135164	0.082006	0.0355811
ENSG00000135205	0.0671334	0.0243075
ENSG00000135249	0.0392396	0.0444332
ENSG00000135297	0.0388363	0.025262
ENSG00000135298	0.161174	0.0236178
ENSG00000135299	0.0960858	0.00717539
ENSG00000135316	0.042741	0.0411665
ENSG00000135317	0.0956183	0.0405118
ENSG00000135324	0.0508092	0.0471747
ENSG00000135333	0.128158	0.0261973
ENSG00000135336	0.0833357	0.0258895
ENSG00000135338	0.0235879	0.0495763
ENSG00000135341	0.0681465	0.0355515
ENSG00000135365	0.133506	0.0067852
ENSG00000135404	-0.0322012	0.0413571
ENSG00000135423	0.0505054	0.0318239
ENSG00000135525	0.128568	0.0218892
ENSG00000135541	0.120833	0.032092
ENSG00000135549	0.0364621	0.0304434
ENSG00000135597	0.0825826	0.0453431
ENSG00000135631	0.0263884	0.0334824
ENSG00000135636	0.0347048	0.0253841
ENSG00000135637	0.0253621	0.0266709
ENSG00000135679	0.0562931	0.0367319
ENSG00000135698	0.075226	0.00869585
ENSG00000135709	0.063481	0.0345134
ENSG00000135766	0.0990731	0.00314675
ENSG00000135778	0.0393056	0.0258503
ENSG00000135837	0.107916	0.0092242
ENSG00000135870	0.0935028	0.0142837
ENSG00000135931	0.0971153	0.0105356
ENSG00000135932	0.0845066	0.0146988
ENSG00000135945	0.0831443	0.0321368
ENSG00000135976	0.13003	0.0292016
ENSG00000135999	0.0857913	0.0293864
ENSG00000136002	0.0762415	0.0290151
ENSG00000136044	0.0685251	0.0323699
ENSG00000136052	0.0952775	0.0253841
ENSG00000136068	0.0618378	0.0327182
ENSG00000136108	0.0458835	0.00624667
ENSG00000136111	0.09454	0.0428783
ENSG00000136147	0.0436343	0.00337384
ENSG00000136153	0.109652	0.00919105
ENSG00000136169	0.0543468	0.0292016
ENSG00000136205	0.0668734	0.00020923
ENSG00000136213	0.0478875	0.01894
ENSG00000136231	0.0434411	0.0200188
ENSG00000136237	0.137856	0.0232774
ENSG00000136261	0.0469678	0.0493321
ENSG00000136280	0.0484746	0.0261466
ENSG00000136297	0.100159	0.000759492
ENSG00000136371	0.0681112	0.00984544
ENSG00000136436	0.0464963	0.0266709
ENSG00000136448	0.0640483	0.0377513
ENSG00000136504	0.0454996	0.0416029
ENSG00000136531	0.102572	0.047592
ENSG00000136546	0.059291	0.0281712
ENSG00000136560	0.0668067	0.0396727
ENSG00000136631	0.0792755	0.036723
ENSG00000136636	0.0642942	0.0386959
ENSG00000136643	0.0950406	0.0317322
ENSG00000136709	0.0912979	0.0274371
ENSG00000136710	-0.0404853	0.00272111
ENSG00000136720	0.0455948	0.0437036
ENSG00000136731	0.0732227	0.00603845
ENSG00000136758	0.0732876	0.0232512
ENSG00000136770	0.0720977	0.025266
ENSG00000136828	0.0981277	0.040748
ENSG00000136842	0.0394845	0.0347331
ENSG00000136848	0.0721853	0.0120403
ENSG00000136861	0.0789281	0.01065
ENSG00000136870	0.0330176	0.0221343
ENSG00000136878	0.046829	0.0258095
ENSG00000136895	0.108811	0.0491879
ENSG00000136937	0.0403817	0.0245643
ENSG00000136938	0.0252289	0.04839
ENSG00000137073	0.0872785	0.0127821
ENSG00000137075	0.0842834	0.0221343
ENSG00000137145	0.0814339	0.0385004
ENSG00000137177	0.0655182	0.0169218
ENSG00000137210	0.18184	0.0412009
ENSG00000137216	0.0478552	0.0418974
ENSG00000137261	0.100015	0.01894
ENSG00000137266	0.079891	0.0399728
ENSG00000137473	0.0666842	0.00602267
ENSG00000137492	0.0350626	0.0382295
ENSG00000137500	0.0391863	0.0497951
ENSG00000137501	0.0572665	0.0187361
ENSG00000137502	0.0608691	0.040748
ENSG00000137504	0.0524246	0.0495423
ENSG00000137513	0.080039	0.00944288
ENSG00000137574	0.0644642	0.0153931
ENSG00000137656	0.0216863	0.0234552
ENSG00000137672	0.125931	0.0250605
ENSG00000137713	0.0509806	0.010114
ENSG00000137727	0.104859	0.0364456
ENSG00000137766	0.202902	0.00523432
ENSG00000137770	0.0719245	0.0260688
ENSG00000137776	0.0677571	0.0351974
ENSG00000137802	0.0642729	0.0355616
ENSG00000137814	0.0263134	0.036723
ENSG00000137821	0.0816469	0.0357555
ENSG00000137822	0.0281576	0.0409632
ENSG00000137845	0.0951573	0.0351974
ENSG00000137871	0.122261	0.0278683
ENSG00000137936	0.0614152	0.0229485
ENSG00000137941	0.10136	0.0410414
ENSG00000137944	0.0481685	0.0384559
ENSG00000137992	0.0434999	0.0322202
ENSG00000138029	0.0409206	0.0478753
ENSG00000138134	0.0624803	0.0470116
ENSG00000138162	0.0817071	0.0247544
ENSG00000138190	0.0948834	0.0466702
ENSG00000138193	0.0713684	0.0452937
ENSG00000138246	0.0595255	0.0428858
ENSG00000138303	0.0565968	0.0418974
ENSG00000138336	0.0556871	0.00675716
ENSG00000138346	0.0344023	0.0387847
ENSG00000138375	0.0590369	0.0340376
ENSG00000138382	0.0303242	0.0355175
ENSG00000138411	0.13312	0.0229826
ENSG00000138430	0.102813	0.0191831
ENSG00000138433	0.0591408	0.0261375
ENSG00000138439	0.0871552	0.0250646
ENSG00000138442	0.0480234	0.0270864
ENSG00000138443	0.109977	0.0222635
ENSG00000138468	0.0897286	0.0347331
ENSG00000138592	0.0648707	0.0318323
ENSG00000138621	0.0626035	0.00524042
ENSG00000138640	0.0830325	0.00653528
ENSG00000138641	0.0967457	0.0351974
ENSG00000138650	0.0853414	0.02731
ENSG00000138653	0.155681	0.00414028
ENSG00000138698	0.134159	0.0136782
ENSG00000138709	0.109358	0.0117091
ENSG00000138759	0.135062	0.0293337
ENSG00000138767	0.0824221	0.0276794
ENSG00000138777	0.114985	0.0151429
ENSG00000138785	0.0321115	0.0365797
ENSG00000138796	0.0408968	0.0224081
ENSG00000138829	0.186936	0.00921191
ENSG00000138834	0.0706881	0.0398935
ENSG00000139117	0.0863324	0.0241966
ENSG00000139132	0.132048	0.000881797
ENSG00000139154	0.155153	0.00984544
ENSG00000139163	0.0814472	0.0387847
ENSG00000139173	0.157426	0.00618076
ENSG00000139174	0.142792	0.0067852
ENSG00000139218	0.081311	0.0126955
ENSG00000139324	0.0624879	0.0145443
ENSG00000139514	0.0490071	0.0213051
ENSG00000139624	0.086747	0.010114
ENSG00000139631	0.0711424	0.0184129
ENSG00000139645	0.0426481	0.0165824
ENSG00000139697	0.0635653	0.0267023
ENSG00000139714	0.025234	0.0217308
ENSG00000139746	0.0958079	0.0455571
ENSG00000139910	0.160121	0.00530595
ENSG00000139946	0.0569255	0.00530595
ENSG00000139973	0.111734	0.0478559
ENSG00000139974	0.0982648	0.0154585
ENSG00000140009	0.0415096	0.0361605
ENSG00000140025	0.0605829	0.014519
ENSG00000140043	0.0285843	0.0377165
ENSG00000140199	0.079294	0.0125464
ENSG00000140262	0.171425	0.00739816
ENSG00000140332	0.0406421	0.00337384
ENSG00000140350	0.0458641	0.0434028
ENSG00000140382	0.0616041	0.0312791
ENSG00000140386	0.168241	0.0055111
ENSG00000140443	0.14511	0.0103462
ENSG00000140488	0.0953567	0.0102178
ENSG00000140577	0.104743	0.00900273
ENSG00000140600	0.163258	0.00924847
ENSG00000140612	0.0511106	0.00486272
ENSG00000140743	0.187688	0.00136375
ENSG00000140750	0.100166	0.00594376
ENSG00000140937	0.111028	0.0186571
ENSG00000140945	0.209898	0.0099292
ENSG00000140948	0.10111	0.0072644
ENSG00000141012	0.0388233	0.0160853
ENSG00000141027	0.100535	0.0264122
ENSG00000141034	0.0218918	0.0250646
ENSG00000141040	0.0206879	0.0465386
ENSG00000141068	0.0921186	0.0168204
ENSG00000141076	0.0335273	0.02731
ENSG00000141084	0.0557901	0.0427506
ENSG00000141127	0.0592481	0.0250605
ENSG00000141179	0.043901	0.0322482
ENSG00000141252	0.0961616	0.0365572
ENSG00000141298	0.104413	0.0493428
ENSG00000141376	0.140344	0.0179272
ENSG00000141378	0.0313419	0.0360588
ENSG00000141429	0.0704839	0.0250646
ENSG00000141446	0.0632768	0.0259605
ENSG00000141447	0.0981287	0.0421763
ENSG00000141449	0.0699911	0.0351974
ENSG00000141452	0.0261783	0.0266069
ENSG00000141503	0.0594756	0.0126979
ENSG00000141556	0.0937656	0.0120403
ENSG00000141564	0.148912	0.00272111
ENSG00000141568	0.101035	0.00618138
ENSG00000141580	0.0441266	0.0367901
ENSG00000141622	0.111155	0.0177747
ENSG00000141627	0.103216	0.0424617
ENSG00000141646	0.090733	0.00599114
ENSG00000141664	0.0572467	0.0396727
ENSG00000141668	0.0977956	0.0385208
ENSG00000141837	0.148667	0.0322202
ENSG00000141905	0.0682925	0.0269007
ENSG00000141985	0.0430643	0.0444332
ENSG00000142002	0.0331636	0.0275023
ENSG00000142046	0.0850509	0.0209133
ENSG00000142065	0.0530718	0.0414768
ENSG00000142166	0.0612865	0.0113687
ENSG00000142185	0.0707452	0.0266448
ENSG00000142197	0.0681791	0.0427506
ENSG00000142207	0.0481838	0.030183
ENSG00000142408	0.104186	0.0144992
ENSG00000142444	0.0206195	0.0433278
ENSG00000142494	0.0802953	0.00919105
ENSG00000142599	0.136321	0.0234795
ENSG00000142784	0.055863	0.00510567
ENSG00000142949	0.0476983	0.0164171
ENSG00000143156	0.0988898	0.0213811
ENSG00000143164	0.0806585	0.0255328
ENSG00000143190	0.120603	0.0186747
ENSG00000143195	0.0750742	0.0377165
ENSG00000143199	0.0300801	0.0478753
ENSG00000143207	0.135996	0.00800513
ENSG00000143322	0.0792313	0.0196207
ENSG00000143324	0.0746038	0.044789
ENSG00000143337	0.0350011	0.0298155
ENSG00000143344	0.0843252	0.0435445
ENSG00000143376	0.0824222	0.0214849
ENSG00000143398	0.0859093	0.0130597
ENSG00000143420	0.113032	0.0188907
ENSG00000143457	0.0404794	0.0177747
ENSG00000143458	0.10804	0.00313592
ENSG00000143473	0.191972	0.0181772
ENSG00000143486	0.0354522	0.00788976
ENSG00000143502	0.0882956	0.010627
ENSG00000143603	0.0364452	0.0155719
ENSG00000143669	0.0959891	0.0436524
ENSG00000143702	0.103364	0.0181806
ENSG00000143748	0.0571079	0.0397717
ENSG00000143776	0.129243	0.0271385
ENSG00000143786	0.0696619	0.0363552
ENSG00000143847	0.0734564	0.00851983
ENSG00000143850	0.139909	0.00531388
ENSG00000143870	0.0416151	0.0478753
ENSG00000143951	0.102642	0.0426234
ENSG00000143952	0.094039	0.0183938
ENSG00000143970	0.0687824	0.0189567
ENSG00000144026	0.0435159	0.00337384
ENSG00000144036	0.127737	0.0238352
ENSG00000144040	0.0723823	0.0387111
ENSG00000144061	0.0427954	0.0256726
ENSG00000144134	0.0376491	0.0377372
ENSG00000144224	0.0761042	0.0214406
ENSG00000144228	0.0560387	0.0387749
ENSG00000144229	0.203363	0.0172624
ENSG00000144278	0.157399	0.00743397
ENSG00000144283	0.178637	0.00337052
ENSG00000144285	0.142077	0.0165577
ENSG00000144290	0.168786	0.0128264
ENSG00000144331	0.137062	0.0328119
ENSG00000144357	0.14418	0.0132056
ENSG00000144406	0.123208	0.0275978
ENSG00000144426	0.0764077	0.025262
ENSG00000144445	0.113332	0.0199222
ENSG00000144451	0.118684	0.0309973
ENSG00000144460	0.0843245	0.0101274
ENSG00000144535	0.10485	0.0179637
ENSG00000144560	0.134355	0.00689265
ENSG00000144580	0.0466415	0.0293318
ENSG00000144649	0.0444306	0.0177095
ENSG00000144671	0.0301224	0.0119656
ENSG00000144711	0.121411	0.0373672
ENSG00000144815	0.0469726	0.0430068
ENSG00000144935	0.0976117	0.0365572
ENSG00000145087	0.165193	0.0108178
ENSG00000145147	0.264836	0.0053495
ENSG00000145241	0.142979	0.0021212
ENSG00000145242	0.146415	0.00602267
ENSG00000145246	0.0543196	0.0491466
ENSG00000145332	0.0564533	0.0164877
ENSG00000145348	0.130296	0.0219896
ENSG00000145349	0.127416	0.0184129
ENSG00000145362	0.160166	0.0122141
ENSG00000145388	0.0368326	0.047448
ENSG00000145439	0.0766007	0.0274371
ENSG00000145476	0.0635656	0.00524042
ENSG00000145526	0.142882	0.0374042
ENSG00000145604	0.0338547	0.0123841
ENSG00000145685	0.067709	0.0116851
ENSG00000145687	0.155343	0.0186742
ENSG00000145715	0.101808	0.0408202
ENSG00000145723	0.0405819	0.00636951
ENSG00000145730	0.159186	0.020829
ENSG00000145734	0.0983871	0.0244375
ENSG00000145743	0.136388	0.0256417
ENSG00000145781	0.119131	0.0072564
ENSG00000145782	0.0671654	0.0113687
ENSG00000145819	0.134289	0.0221343
ENSG00000145860	0.0895216	0.0183322
ENSG00000145861	0.020454	0.044602
ENSG00000145916	0.0388801	0.021198
ENSG00000145934	0.175886	0.0139535
ENSG00000145982	0.130844	0.0120403
ENSG00000145996	0.135397	0.00803019
ENSG00000146006	0.0511239	0.0179502
ENSG00000146021	0.0709952	0.0275013
ENSG00000146067	0.0509696	0.045982
ENSG00000146143	0.0576686	0.0268518
ENSG00000146151	0.0920834	0.0367633
ENSG00000146216	0.0452791	0.0176237
ENSG00000146243	0.101115	0.0130597
ENSG00000146282	0.0820414	0.00919105
ENSG00000146350	0.106943	0.0208085
ENSG00000146376	0.106294	0.00313592
ENSG00000146414	0.0995384	0.0351694
ENSG00000146426	0.125699	0.011563
ENSG00000146463	0.123396	0.0053495
ENSG00000146587	0.0353901	0.0258503
ENSG00000146776	0.0827952	0.0412009
ENSG00000146833	0.039998	0.0424989
ENSG00000146842	0.0310643	0.0298191
ENSG00000146872	0.0777682	0.0196492
ENSG00000146918	0.0447117	0.00369983
ENSG00000146938	0.151112	0.0145246
ENSG00000146966	0.0908611	0.0186747
ENSG00000147010	0.12833	0.0123512
ENSG00000147041	0.111428	0.0396922
ENSG00000147044	0.120999	0.0143632
ENSG00000147050	0.101609	0.00908998
ENSG00000147099	0.160131	0.011253
ENSG00000147100	0.0557912	0.0177747
ENSG00000147121	0.0462159	0.0327718
ENSG00000147133	0.0666869	0.0327182
ENSG00000147162	0.114188	0.00843359
ENSG00000147174	0.0412035	0.0351974
ENSG00000147202	0.117637	0.00554881
ENSG00000147234	0.0500482	0.0197893
ENSG00000147274	0.0920084	0.00783519
ENSG00000147316	0.0793074	0.0411673
ENSG00000147421	0.102011	0.0200188
ENSG00000147481	0.243646	0.0055111
ENSG00000147509	0.0473766	0.0375985
ENSG00000147548	0.114109	0.0192005
ENSG00000147586	0.0830821	0.0351211
ENSG00000147642	0.134764	0.00554881
ENSG00000147655	0.122855	0.023267
ENSG00000147679	0.0810905	0.0288001
ENSG00000147799	0.0402538	0.016099
ENSG00000147854	0.0842117	0.0151429
ENSG00000147905	0.137559	0.0160397
ENSG00000147912	0.078035	0.0123969
ENSG00000148019	0.0499391	0.0170351
ENSG00000148123	0.148299	0.0105638
ENSG00000148154	0.053185	0.0274371
ENSG00000148158	0.039449	0.0440616
ENSG00000148200	0.0912972	0.0337654
ENSG00000148219	0.200879	0.0101507
ENSG00000148358	0.0589757	0.034344
ENSG00000148408	0.136835	0.0291975
ENSG00000148468	0.0910038	0.0191831
ENSG00000148516	0.133564	0.0214849
ENSG00000148541	0.111101	0.00924847
ENSG00000148606	0.0554428	0.0306983
ENSG00000148634	0.161251	0.00602267
ENSG00000148730	0.0297591	0.0396242
ENSG00000148842	0.114603	0.0221343
ENSG00000148843	0.0293166	0.0203877
ENSG00000148925	0.0688154	0.0407
ENSG00000148948	0.339189	0.00346874
ENSG00000149256	0.125703	0.0491256
ENSG00000149289	0.0850347	0.0194717
ENSG00000149308	0.0810825	0.00636174
ENSG00000149311	0.0754182	0.0397014
ENSG00000149639	0.110872	0.0217873
ENSG00000149970	0.173096	0.00345938
ENSG00000149972	0.264679	0.00602267
ENSG00000150054	0.0583667	0.0365797
ENSG00000150361	0.0801115	0.0449509
ENSG00000150394	0.131384	0.0364419
ENSG00000150471	0.148242	0.047733
ENSG00000150477	0.113756	0.0268798
ENSG00000150593	0.0730047	0.0190878
ENSG00000150627	0.0944169	0.0478753
ENSG00000150672	0.178254	0.00919105
ENSG00000150967	0.0756864	0.0191455
ENSG00000150995	0.168808	0.00851983
ENSG00000151065	0.0562273	0.0141613
ENSG00000151067	0.162951	0.0186747
ENSG00000151090	0.137158	0.0311762
ENSG00000151092	0.083034	0.0266069
ENSG00000151131	0.0463362	0.0181772
ENSG00000151136	0.172922	0.0402783
ENSG00000151150	0.15703	0.0181772
ENSG00000151176	0.059397	0.00860052
ENSG00000151208	0.0534466	0.0412009
ENSG00000151229	0.142555	0.0126137
ENSG00000151240	0.137705	0.0214861
ENSG00000151276	0.122824	0.0345989
ENSG00000151320	0.157153	0.0126695
ENSG00000151322	0.233295	0.00843359
ENSG00000151332	0.0407323	0.0293337
ENSG00000151338	0.0956107	0.042121
ENSG00000151348	0.0666273	0.0399728
ENSG00000151413	0.0786987	0.0398603
ENSG00000151466	0.100524	0.0143468
ENSG00000151468	0.12965	0.00586764
ENSG00000151474	0.212592	0.00530595
ENSG00000151491	0.0668387	0.0168804
ENSG00000151532	0.107956	0.0306046
ENSG00000151552	0.054379	0.0396645
ENSG00000151553	0.0569117	0.0389517
ENSG00000151575	0.0464839	0.0237844
ENSG00000151623	0.121787	0.0178431
ENSG00000151692	0.0978597	0.0119764
ENSG00000151693	0.0573256	0.0351974
ENSG00000151743	0.0778316	0.0222769
ENSG00000151746	0.1531	0.00787434
ENSG00000151779	0.119733	0.0260722
ENSG00000151812	0.0901364	0.0220825
ENSG00000151834	0.1179	0.0186747
ENSG00000151835	0.0846988	0.0292879
ENSG00000151849	0.0724917	0.00337384
ENSG00000151881	0.044371	0.0240498
ENSG00000151893	0.0861424	0.0172624
ENSG00000151914	0.138088	0.0176446
ENSG00000151923	0.0989038	0.00234339
ENSG00000151948	0.0660721	0.0305905
ENSG00000152056	0.0389303	0.00742292
ENSG00000152061	0.13618	0.0186975
ENSG00000152092	0.134003	0.0199633
ENSG00000152127	0.122445	0.00804403
ENSG00000152154	0.0880361	0.0461685
ENSG00000152208	0.198442	0.010474
ENSG00000152214	0.0837013	0.0117973
ENSG00000152217	0.129573	0.0387847
ENSG00000152223	0.089016	0.00781512
ENSG00000152240	0.0208784	0.0212773
ENSG00000152256	0.036035	0.0383949
ENSG00000152348	0.0721587	0.0347484
ENSG00000152377	0.140869	0.0181847
ENSG00000152380	0.044251	0.0370616
ENSG00000152402	0.109623	0.0196492
ENSG00000152409	0.0731611	0.0198398
ENSG00000152422	0.0363441	0.0364456
ENSG00000152465	0.0810556	0.00940222
ENSG00000152484	0.0613227	0.0147343
ENSG00000152492	0.0747933	0.00803019
ENSG00000152520	0.120289	0.0299081
ENSG00000152578	0.151004	0.0193033
ENSG00000152582	0.0652824	0.0171527
ENSG00000152601	0.100922	0.0321368
ENSG00000152683	0.0627994	0.0153043
ENSG00000152763	0.0680722	0.0380772
ENSG00000152822	0.243703	0.00272111
ENSG00000152894	0.238634	0.00945564
ENSG00000152910	0.128357	0.0209133
ENSG00000152926	0.0296187	0.0219896
ENSG00000152932	0.126547	0.0331176
ENSG00000152942	0.0476496	0.00896029
ENSG00000152952	0.0768733	0.0285262
ENSG00000153015	0.0938557	0.0261375
ENSG00000153066	0.0535084	0.022333
ENSG00000153157	0.0661272	0.014519
ENSG00000153207	0.106008	0.00731979
ENSG00000153233	0.154756	0.0117228
ENSG00000153237	0.114386	0.00554881
ENSG00000153253	0.123005	0.0161557
ENSG00000153317	0.103061	0.0448705
ENSG00000153558	0.104863	0.0146945
ENSG00000153707	0.199449	0.00936972
ENSG00000153774	0.0926634	0.00602267
ENSG00000153814	0.124257	0.0346222
ENSG00000153815	0.132355	0.00903262
ENSG00000153832	0.0527262	0.0199222
ENSG00000153914	0.0698075	0.0335591
ENSG00000153922	0.0794431	0.00803019
ENSG00000153944	0.150951	0.00482729
ENSG00000153956	0.142245	0.0130597
ENSG00000153982	0.0808445	0.0212921
ENSG00000154027	0.0921263	0.0221291
ENSG00000154079	0.0344758	0.0106341
ENSG00000154096	-0.0913034	0.0393517
ENSG00000154118	0.0726584	0.023097
ENSG00000154122	0.111236	0.0258774
ENSG00000154153	0.0712547	0.0412402
ENSG00000154229	0.112517	0.0493321
ENSG00000154240	0.130924	0.0151669
ENSG00000154358	0.0272282	0.0288158
ENSG00000154556	0.129891	0.0383835
ENSG00000154655	0.190111	0.00941122
ENSG00000154710	0.18501	0.0295145
ENSG00000154719	0.033485	0.0162439
ENSG00000154727	0.034472	0.0275978
ENSG00000154803	0.0973178	0.00272111
ENSG00000154822	0.0864113	0.0459021
ENSG00000154845	0.0774719	0.0264098
ENSG00000154864	0.107331	0.0315553
ENSG00000154889	0.0325873	0.0412009
ENSG00000155011	0.100158	0.0193064
ENSG00000155093	0.187831	0.00991165
ENSG00000155111	0.102744	0.00624628
ENSG00000155329	0.0370471	0.0145056
ENSG00000155506	0.0901591	0.0249885
ENSG00000155545	0.0365847	0.0106395
ENSG00000155561	0.0760311	0.00686757
ENSG00000155621	0.0580438	0.00855848
ENSG00000155657	0.103722	0.0175855
ENSG00000155792	0.0565596	0.0389133
ENSG00000155816	0.146188	0.0141227
ENSG00000155886	0.126223	0.0369308
ENSG00000155893	0.0609337	0.0308405
ENSG00000155897	0.174081	0.00739816
ENSG00000155966	0.0887491	0.0412786
ENSG00000156017	0.0496463	0.0293782
ENSG00000156042	0.0451907	0.0471737
ENSG00000156052	0.0931578	0.0445623
ENSG00000156103	0.177614	0.00615878
ENSG00000156110	0.131829	0.0208279
ENSG00000156162	0.0502352	0.0112509
ENSG00000156170	0.0835361	0.0311762
ENSG00000156206	0.124636	0.0125995
ENSG00000156218	0.185541	0.00339549
ENSG00000156304	0.0463501	0.0473918
ENSG00000156313	0.0333548	0.0386344
ENSG00000156374	0.0558031	0.0181772
ENSG00000156471	0.0504141	0.0305708
ENSG00000156475	0.149748	0.0181806
ENSG00000156502	0.0478899	0.023097
ENSG00000156521	0.0243425	0.0452172
ENSG00000156564	0.10251	0.0154436
ENSG00000156650	0.113597	0.0179502
ENSG00000156671	0.0534042	0.0393729
ENSG00000156687	0.171598	0.0298074
ENSG00000156709	0.0222337	0.0348846
ENSG00000156802	0.0679394	0.00773958
ENSG00000156831	0.0848926	0.0459301
ENSG00000156958	0.0761643	0.0253841
ENSG00000156959	0.0948249	0.0162439
ENSG00000156968	0.0397876	0.0222635
ENSG00000157005	-0.307775	0.00272111
ENSG00000157077	0.122664	0.016672
ENSG00000157106	0.106163	0.0117973
ENSG00000157107	0.0757213	0.023968
ENSG00000157181	0.0528238	0.0325117
ENSG00000157212	0.0341776	0.0452172
ENSG00000157216	0.0658452	0.0404829
ENSG00000157349	0.0615988	0.00937588
ENSG00000157350	0.0575097	0.0117617
ENSG00000157388	0.123031	0.0381899
ENSG00000157445	0.144907	0.0451305
ENSG00000157450	0.0993049	0.0119764
ENSG00000157540	0.129991	0.0111105
ENSG00000157542	0.175034	0.00314675
ENSG00000157600	0.0439591	0.0250646
ENSG00000157617	0.0317756	0.0123512
ENSG00000157657	0.0668921	0.0402783
ENSG00000157741	0.0840891	0.0379899
ENSG00000157796	0.112489	0.0067852
ENSG00000157800	0.0442129	0.04839
ENSG00000157823	0.0647961	0.0409176
ENSG00000157827	0.0989784	0.04839
ENSG00000157851	0.0639453	0.0455653
ENSG00000157869	0.105065	0.0165577
ENSG00000157933	0.0694241	0.0394511
ENSG00000157985	0.133538	0.0241384
ENSG00000158089	0.153424	0.0122141
ENSG00000158169	0.0475678	0.00680964
ENSG00000158195	0.062271	0.0055111
ENSG00000158220	0.0477024	0.00908998
ENSG00000158296	0.0775351	0.0327753
ENSG00000158321	0.171964	0.016021
ENSG00000158458	0.124269	0.011563
ENSG00000158467	0.121715	0.00924847
ENSG00000158470	0.0829649	0.0144255
ENSG00000158528	0.140234	0.0122141
ENSG00000158545	0.031963	0.0407546
ENSG00000158560	0.11236	0.0422374
ENSG00000158636	0.114645	0.00530595
ENSG00000158683	0.137589	0.0126695
ENSG00000158691	0.0188649	0.0499853
ENSG00000158711	0.0265503	0.0293954
ENSG00000158966	0.0556013	0.00715983
ENSG00000158985	0.0782784	0.0412786
ENSG00000159023	0.0951967	0.00467827
ENSG00000159147	0.0309911	0.00803019
ENSG00000159267	0.131871	0.00689265
ENSG00000159433	0.149132	0.00272111
ENSG00000159445	0.0532042	0.0130045
ENSG00000159459	0.118253	0.00803019
ENSG00000159461	0.0445319	0.0256726
ENSG00000159579	0.0552611	0.0186747
ENSG00000159592	0.0858506	0.0067852
ENSG00000159593	0.0575959	0.0367633
ENSG00000159714	0.0206438	0.0477043
ENSG00000159733	0.0972097	0.0221531
ENSG00000159788	0.0781315	0.00598852
ENSG00000159792	0.0286505	0.0260722
ENSG00000159842	0.111688	0.0254043
ENSG00000159871	0.0513673	0.00272111
ENSG00000159917	0.0569925	0.0421763
ENSG00000160007	0.147387	0.00525781
ENSG00000160094	0.0385189	0.0452172
ENSG00000160145	0.135841	0.0243075
ENSG00000160194	0.0560347	0.0341917
ENSG00000160199	0.090485	0.0070686
ENSG00000160208	0.0436569	0.0122141
ENSG00000160216	0.0751782	0.012944
ENSG00000160229	0.0337457	0.0461437
ENSG00000160271	0.0523705	0.0365572
ENSG00000160299	0.0907992	0.0130597
ENSG00000160305	0.081834	0.0351974
ENSG00000160310	0.0623554	0.0338488
ENSG00000160445	0.080748	0.0293954
ENSG00000160460	0.113564	0.0343523
ENSG00000160539	0.0403954	0.0217873
ENSG00000160783	0.0291524	0.0205823
ENSG00000161021	0.0780342	0.00558816
ENSG00000161082	0.118359	0.0133495
ENSG00000161217	0.0485834	0.0396242
ENSG00000161298	0.0684326	0.0101826
ENSG00000161681	0.0529091	0.0450732
ENSG00000161813	0.0562573	0.0386344
ENSG00000162032	-0.0358083	0.015423
ENSG00000162104	0.121144	0.0070835
ENSG00000162105	0.107925	0.0393517
ENSG00000162129	0.040351	0.0189153
ENSG00000162374	0.105331	0.0118238
ENSG00000162390	0.0341093	0.0269076
ENSG00000162402	0.0803112	0.0475747
ENSG00000162415	0.142669	0.0055111
ENSG00000162433	0.0262934	0.0184191
ENSG00000162437	0.0512747	0.0193688
ENSG00000162521	0.0702522	0.0177966
ENSG00000162604	0.0648788	0.00937588
ENSG00000162613	0.0706172	0.0235697
ENSG00000162616	0.0324879	0.0309586
ENSG00000162627	0.0369896	0.0402968
ENSG00000162636	0.0809972	0.0165824
ENSG00000162670	0.297044	0.00692276
ENSG00000162687	0.071172	0.0161653
ENSG00000162695	0.0632709	0.0151553
ENSG00000162706	0.0764126	0.0235236
ENSG00000162769	0.0486249	0.0386512
ENSG00000162804	0.0744647	0.0475221
ENSG00000162836	0.0464543	0.014519
ENSG00000162849	0.168592	0.0285262
ENSG00000162852	0.0649811	0.0381899
ENSG00000162923	0.0746858	0.0176237
ENSG00000162927	0.0413723	0.0172624
ENSG00000162928	0.0349847	0.0423046
ENSG00000162929	0.111491	0.0348212
ENSG00000162961	0.0435597	0.0368593
ENSG00000162972	0.0505686	0.0169864
ENSG00000162989	0.170281	0.0124715
ENSG00000162994	0.0876729	0.00689265
ENSG00000163006	0.0753319	0.0239764
ENSG00000163013	0.0479353	0.0153856
ENSG00000163041	0.0590957	0.0199222
ENSG00000163046	0.129373	0.0254043
ENSG00000163116	0.0875944	0.00602267
ENSG00000163125	0.114707	0.019285
ENSG00000163138	0.0552304	0.0427506
ENSG00000163162	0.0745016	0.0293864
ENSG00000163166	0.0806798	0.0132776
ENSG00000163214	0.0568985	0.0439404
ENSG00000163285	0.0654425	0.014519
ENSG00000163288	0.176568	0.00937588
ENSG00000163374	0.0573025	0.0290292
ENSG00000163389	0.0530565	0.0130597
ENSG00000163393	0.0956572	0.00594624
ENSG00000163527	0.062492	0.0322859
ENSG00000163531	0.161959	0.00602267
ENSG00000163590	0.159891	0.00689265
ENSG00000163596	0.138929	0.00586764
ENSG00000163611	0.0555234	0.00114217
ENSG00000163618	0.129407	0.035717
ENSG00000163629	0.061885	0.0225414
ENSG00000163630	0.149825	0.0202215
ENSG00000163635	0.102917	0.0155413
ENSG00000163637	0.120976	0.0235688
ENSG00000163655	0.0618344	0.0169218
ENSG00000163684	0.0270811	0.0117137
ENSG00000163686	0.0452481	0.0351974
ENSG00000163689	0.0536641	0.0191088
ENSG00000163755	0.0384572	0.0342312
ENSG00000163811	0.0449649	0.04197
ENSG00000163864	0.0366999	0.04197
ENSG00000163866	0.0577211	0.0186984
ENSG00000163872	0.0926492	0.0184191
ENSG00000163873	0.136615	0.038975
ENSG00000163888	-0.0908675	0.00688734
ENSG00000163946	0.0911538	0.0402964
ENSG00000163960	0.078017	0.00761431
ENSG00000163995	0.0896296	0.0415321
ENSG00000164023	0.0250187	0.0451187
ENSG00000164048	0.0662367	0.016672
ENSG00000164061	0.0714187	0.0269076
ENSG00000164066	0.0614588	0.0445623
ENSG00000164074	0.0907596	0.0255892
ENSG00000164080	0.109985	0.00313592
ENSG00000164100	0.1327	0.0156973
ENSG00000164128	0.043668	0.0421763
ENSG00000164134	0.0641092	0.043955
ENSG00000164144	0.0746686	0.0168305
ENSG00000164162	0.104134	0.0268987
ENSG00000164164	0.0545152	0.0238121
ENSG00000164176	0.121606	0.0146723
ENSG00000164180	0.0627515	0.0271297
ENSG00000164182	0.0772947	0.0306586
ENSG00000164190	0.0966785	0.0336527
ENSG00000164197	0.102188	0.0348522
ENSG00000164199	0.0735707	0.0091833
ENSG00000164253	0.0598365	0.0311509
ENSG00000164291	0.0241079	0.0305905
ENSG00000164300	0.0923712	0.0294576
ENSG00000164305	0.0329676	0.0179272
ENSG00000164327	0.10278	0.0288158
ENSG00000164418	0.189188	0.0143468
ENSG00000164463	0.0848151	0.026166
ENSG00000164466	0.0701757	0.0179283
ENSG00000164494	0.0853795	0.0210068
ENSG00000164506	0.168289	0.00682919
ENSG00000164597	0.133263	0.0123512
ENSG00000164604	0.020565	0.0226234
ENSG00000164627	0.0545821	0.0327182
ENSG00000164654	0.0424282	0.0311762
ENSG00000164659	0.124093	0.0374042
ENSG00000164663	0.0778049	0.0180809
ENSG00000164715	0.10451	0.0067852
ENSG00000164796	0.216712	0.0144255
ENSG00000164808	0.115002	0.0380486
ENSG00000164818	0.044706	0.0208279
ENSG00000164828	0.102703	0.00803019
ENSG00000164830	0.186675	0.00900273
ENSG00000164902	0.0437247	0.0205041
ENSG00000164916	0.0537138	0.0225483
ENSG00000164941	0.0702805	0.0112509
ENSG00000164946	0.100453	0.0261973
ENSG00000164970	0.0664306	0.0349704
ENSG00000164985	0.104555	0.0108331
ENSG00000164989	0.0773749	0.0475021
ENSG00000165006	0.0675539	0.043331
ENSG00000165046	0.0284227	0.0153856
ENSG00000165061	0.183568	0.0141442
ENSG00000165084	0.148155	0.0368814
ENSG00000165138	0.0537015	0.0288858
ENSG00000165185	0.0653335	0.022333
ENSG00000165186	0.0654015	0.00803019
ENSG00000165197	0.0403094	0.00554881
ENSG00000165219	0.0883533	0.0172624
ENSG00000165238	0.11221	0.00787434
ENSG00000165259	0.0869937	0.00841815
ENSG00000165288	0.0716517	0.0221343
ENSG00000165300	0.0762251	0.0342736
ENSG00000165379	0.176701	0.0117228
ENSG00000165406	0.0870277	0.0164677
ENSG00000165443	0.102696	0.0327753
ENSG00000165487	0.0836318	0.0330723
ENSG00000165495	0.161577	0.00597968
ENSG00000165521	0.0905528	0.0440254
ENSG00000165548	0.102902	0.00900273
ENSG00000165591	0.0961188	0.0167551
ENSG00000165630	0.0477316	0.0326052
ENSG00000165632	0.0698026	0.0404423
ENSG00000165671	0.101112	0.0177747
ENSG00000165675	0.166495	0.00339549
ENSG00000165699	0.0885065	0.0134658
ENSG00000165730	0.0361807	0.0151669
ENSG00000165752	0.04015	0.0150246
ENSG00000165813	0.0706736	0.012881
ENSG00000165868	0.165903	0.0123512
ENSG00000165914	0.118782	0.0151669
ENSG00000165959	0.0505614	0.0232774
ENSG00000165973	0.215074	0.00594624
ENSG00000165995	0.185179	0.0101274
ENSG00000166004	0.0696622	0.0237609
ENSG00000166006	0.14843	0.0341917
ENSG00000166035	0.0629566	0.00715983
ENSG00000166046	0.0426834	0.00456908
ENSG00000166073	0.0789988	0.0268518
ENSG00000166086	0.109467	0.0144255
ENSG00000166123	0.0580914	0.00843359
ENSG00000166128	0.0873717	0.0125234
ENSG00000166147	0.106744	0.0223469
ENSG00000166165	-0.138403	0.0157238
ENSG00000166206	0.117334	0.0199222
ENSG00000166225	0.0809119	0.0253841
ENSG00000166250	0.119113	0.0155413
ENSG00000166263	0.060835	0.0172624
ENSG00000166272	0.0683103	0.0172624
ENSG00000166278	0.038641	0.0220902
ENSG00000166295	0.0781248	0.0222769
ENSG00000166326	0.0799137	0.0435358
ENSG00000166342	0.192372	0.00655629
ENSG00000166348	0.0817759	0.0202815
ENSG00000166352	0.0430215	0.0495026
ENSG00000166387	0.0354245	0.00783519
ENSG00000166398	0.104839	0.022047
ENSG00000166402	0.0535542	0.0356518
ENSG00000166436	0.0419419	0.0274013
ENSG00000166439	0.080588	0.0177747
ENSG00000166444	0.168439	0.0238121
ENSG00000166450	0.0356557	0.0396727
ENSG00000166455	0.0306043	0.0161759
ENSG00000166478	0.0253334	0.0379899
ENSG00000166501	0.11735	0.0258949
ENSG00000166532	0.0940012	0.00554881
ENSG00000166575	0.100316	0.021342
ENSG00000166669	0.0537951	0.0494737
ENSG00000166676	0.0963754	0.00455389
ENSG00000166747	0.0691553	0.02731
ENSG00000166833	0.135372	0.0462806
ENSG00000166839	0.0590831	0.041152
ENSG00000166862	0.125652	0.0186747
ENSG00000166897	0.0440803	0.0222635
ENSG00000166900	0.04747	0.0336527
ENSG00000166979	0.11714	0.00686436
ENSG00000167037	0.113289	0.0364286
ENSG00000167193	0.0618242	0.0177626
ENSG00000167202	0.04902	0.0304244
ENSG00000167220	0.0704512	0.0195012
ENSG00000167232	0.109677	0.0237581
ENSG00000167258	0.075922	0.0305905
ENSG00000167281	0.190035	0.00618076
ENSG00000167323	0.0761529	0.0268518
ENSG00000167380	0.0390582	0.0126793
ENSG00000167522	0.119317	0.0120403
ENSG00000167524	0.100857	0.000778206
ENSG00000167562	0.0300372	0.00692521
ENSG00000167635	0.0547269	0.0208279
ENSG00000167693	0.0546892	0.0172624
ENSG00000167766	0.0840653	0.00953501
ENSG00000167889	0.0649837	0.0473234
ENSG00000167904	0.0426654	0.0330646
ENSG00000167978	0.0859891	0.0185913
ENSG00000167985	0.0497936	0.0128483
[truncated: 793 more rows]

## Sheet: SST_neuron_Normal_vs_Resilience
ENSEMBL ID	log2FC	FDR
ENSG00000007202	0.0680018	0.0327311
ENSG00000018625	-0.101618	0.0167278
ENSG00000029153	0.101741	0.0120249
ENSG00000031698	0.132361	0.0102939
ENSG00000035687	0.146676	0.00809525
ENSG00000036549	0.316999	0.00513786
ENSG00000047346	0.242492	0.00686929
ENSG00000047578	0.149026	0.0157787
ENSG00000047621	0.127285	0.0101948
ENSG00000065060	0.19246	0.00908518
ENSG00000067840	-0.0693846	0.0392444
ENSG00000072415	0.146196	0.00686929
ENSG00000081870	0.0803113	0.0405876
ENSG00000087250	-0.25832	0.00781059
ENSG00000088247	-0.092503	0.00809525
ENSG00000088854	0.437519	0.00513786
ENSG00000090861	0.155957	0.00781059
ENSG00000099284	0.0878624	0.0136495
ENSG00000099308	-0.0804544	0.0438202
ENSG00000101210	-0.193789	0.0450887
ENSG00000101439	-0.19559	0.00513786
ENSG00000102125	0.0969615	0.00686929
ENSG00000104059	0.466915	0.00513786
ENSG00000104331	0.13601	0.00809525
ENSG00000104833	-0.18225	0.0153614
ENSG00000104888	-0.11781	0.0450887
ENSG00000105926	0.393883	0.00513786
ENSG00000105948	0.101196	0.019772
ENSG00000105968	0.151039	0.00686929
ENSG00000106105	0.120545	0.0167278
ENSG00000108518	-0.0549946	0.0453486
ENSG00000109265	0.561683	0.00513786
ENSG00000111647	0.233666	0.00686929
ENSG00000112144	0.0841651	0.0167278
ENSG00000112739	0.220602	0.00513786
ENSG00000113391	0.54568	0.00513786
ENSG00000113407	0.0694681	0.0196358
ENSG00000113643	0.118088	0.0112125
ENSG00000113648	0.185217	0.00513786
ENSG00000114405	0.125732	0.00600834
ENSG00000115866	0.182568	0.00600834
ENSG00000116299	0.178924	0.045464
ENSG00000123119	-0.127681	0.0420257
ENSG00000123416	-0.352201	0.00686929
ENSG00000125149	0.0797902	0.0153614
ENSG00000126870	0.318392	0.0058898
ENSG00000129295	0.236325	0.00686929
ENSG00000130558	-0.15861	0.0134852
ENSG00000130921	0.109197	0.00686929
ENSG00000131095	-0.228847	0.0058898
ENSG00000132475	0.214833	0.00809525
ENSG00000133641	0.0817137	0.00781059
ENSG00000133706	0.216775	0.00600834
ENSG00000133794	0.161394	0.00513786
ENSG00000134440	0.135575	0.0118043
ENSG00000134684	0.136517	0.0119533
ENSG00000135486	-0.147757	0.013443
ENSG00000135821	-0.150942	0.0392444
ENSG00000136536	0.245899	0.00513786
ENSG00000136628	0.203532	0.00790722
ENSG00000136682	0.081337	0.049974
ENSG00000138688	0.491688	0.00433043
ENSG00000140105	0.0868363	0.0387585
ENSG00000140395	0.122226	0.0259905
ENSG00000141219	0.0698916	0.0199886
ENSG00000141622	0.168124	0.0153614
ENSG00000143774	-0.144305	0.0115793
ENSG00000144583	0.2977	0.00984826
ENSG00000145375	0.229637	0.00686929
ENSG00000145416	0.678547	0.00513786
ENSG00000145495	0.455892	0.00513786
ENSG00000147996	0.185684	0.00781059
ENSG00000149179	0.324465	0.00600834
ENSG00000149639	0.179164	0.0112125
ENSG00000151131	0.069349	0.0288514
ENSG00000151136	0.338547	0.00975946
ENSG00000151553	0.115291	0.00686929
ENSG00000152242	0.183112	0.00721971
ENSG00000152763	0.118775	0.0349831
ENSG00000153310	0.575211	0.00513786
ENSG00000154146	-0.241228	0.0153614
ENSG00000154277	-0.270962	0.0245389
ENSG00000155744	0.364481	0.00349521
ENSG00000156411	0.129315	0.0153614
ENSG00000157654	0.579389	0.00349521
ENSG00000159335	-0.126523	0.0438202
ENSG00000162244	-0.146115	0.0110261
ENSG00000162545	-0.236525	0.0153614
ENSG00000162636	0.133698	0.00691813
ENSG00000162929	0.228245	0.00513786
ENSG00000163041	0.0862625	0.0294144
ENSG00000163684	-0.0511548	0.0156892
ENSG00000163689	0.0806475	0.0156892
ENSG00000164542	0.131335	0.0139137
ENSG00000164659	0.251621	0.00686929
ENSG00000164972	0.0818043	0.0117008
ENSG00000165152	0.152684	0.00686929
ENSG00000165406	0.120328	0.0294467
ENSG00000165795	-0.114015	0.0167278
ENSG00000166398	0.175056	0.00721971
ENSG00000166444	0.287819	0.0110261
ENSG00000166734	0.460188	0.00513786
ENSG00000166963	-0.178617	0.0420257
ENSG00000166986	0.101379	0.0245389
ENSG00000168255	-0.186777	0.00513786
ENSG00000168273	0.0624295	0.0245965
ENSG00000168309	-0.139759	0.00349521
ENSG00000168490	-0.180213	0.0111039
ENSG00000170315	-0.197457	0.0259991
ENSG00000170445	0.153726	0.00600834
ENSG00000171246	-0.0992061	0.0450887
ENSG00000171617	-0.168358	0.00809525
ENSG00000172428	-0.115482	0.0119533
ENSG00000172757	-0.181754	0.014658
ENSG00000172775	0.100849	0.024742
ENSG00000172785	0.0859176	0.0119533
ENSG00000173715	0.326111	0.00600834
ENSG00000173915	0.150693	0.00809525
ENSG00000176396	-0.0405186	0.0368397
ENSG00000176903	-0.12144	0.0227227
ENSG00000178988	-0.0801921	0.00809525
ENSG00000179010	-0.130659	0.0466617
ENSG00000180011	0.0648718	0.0156261
ENSG00000180354	-0.160575	0.0453486
ENSG00000181751	0.0763451	0.00809525
ENSG00000183172	-0.0617492	0.015944
ENSG00000183354	0.330294	0.00513786
ENSG00000183654	0.366371	0.00513786
ENSG00000183833	0.15402	0.00809525
ENSG00000184515	-0.0981273	0.025627
ENSG00000184897	0.138152	0.00686929
ENSG00000185418	0.277013	0.00513786
ENSG00000186073	0.223838	0.00793186
ENSG00000186166	0.211075	0.00600834
ENSG00000186205	0.0545115	0.0167278
ENSG00000187094	-0.144926	0.0294467
ENSG00000187954	0.101205	0.0221921
ENSG00000188343	0.126902	0.00686929
ENSG00000189060	0.0928999	0.0180846
ENSG00000196305	0.198825	0.00686929
ENSG00000196872	0.182542	0.0182185
ENSG00000197302	0.101546	0.0250092
ENSG00000197872	0.363774	0.00513786
ENSG00000198060	0.0933075	0.0462696
ENSG00000198677	0.340706	0.00513786
ENSG00000198763	-0.463508	0.0360616
ENSG00000198888	-0.490481	0.0495716
ENSG00000198914	-0.111018	0.0450887
ENSG00000198954	0.111551	0.0110261
ENSG00000204442	1.21629	0.00513786
ENSG00000204954	0.0664539	0.0267868
ENSG00000205129	0.0833649	0.0294467
ENSG00000205765	0.0643468	0.0116614
ENSG00000213066	0.188738	0.00809525
ENSG00000213123	0.173743	0.00600834
ENSG00000214338	0.195525	0.00513786
ENSG00000227051	-0.0647801	0.0387585
ENSG00000233757	0.105362	0.0227553
ENSG00000243667	0.113512	0.00988722
ENSG00000284770	-0.0928063	0.00280299
ENSG00000291237	-0.246285	0.00280299

## Sheet: GO_Resilience_associated_Up
Term	Overlap	Adjusted P-value	Odds Ratio
Regulation of Chaperone-Mediated Autophagy (GO:1904714)	2	0.010956428015155874	285.2142857142857
Removal of Superoxide Radicals (GO:0019430)	2	0.015723099904574912	129.6038961038961
Cellular Response to Superoxide (GO:0071451)	2	0.015723099904574912	118.79761904761905
Regulation of Neuron Apoptotic Process (GO:0043523)	3	0.04516465902163808	17.499118165784832
Regulation of Protein Catabolic Process (GO:0042176)	3	0.04516465902163808	17.499118165784832
