# Supplementary material for: A Scalable Human Brain Cell Atlas Foundation Model Dissects the Cellular Immune Codes and Cognitive Resilience
Source: Research Square preprint supplement (doi:10.21203/rs.3.rs-6986171/v1), 2025-07-08
Supplement: Supplementary file 8 [file Supplemental_Table_S4.xlsx]

## Sheet: ALL LRs
Significant Ligand-Receptors (LRs) across different immune subpopulations and groups.
id_cp_interaction	interacting_pair	gene_a	gene_b	classification	p_values	p_adj	mean_pexr	score	group	sig	celltypeA_source	celltypeB_target
CPI-SS0889E281D	CADM1_CADM1	CADM1	CADM1	Adhesion by CADM	0	0	0.5307	6.727	AD	sig	DAM1	DAM1
CPI-SS0889E281D	CADM1_CADM1	CADM1	CADM1	Adhesion by CADM	0	0	0.3954	0.776	AD	sig	DAM1	Homeostasis 1
CPI-SS0889E281D	CADM1_CADM1	CADM1	CADM1	Adhesion by CADM	0.0002	0.0024	0.3789	0.049	AD	sig	DAM1	Homeostasis 2
CPI-SS0889E281D	CADM1_CADM1	CADM1	CADM1	Adhesion by CADM	0	0	0.4842	4.679	AD	sig	DAM1	Inflammation
CPI-SS0889E281D	CADM1_CADM1	CADM1	CADM1	Adhesion by CADM	0	0	0.4206	1.882	AD	sig	DAM1	T cell
CPI-SS0889E281D	CADM1_CADM1	CADM1	CADM1	Adhesion by CADM	0	0	0.4584	3.548	AD	sig	DAM1	MHC 1
CPI-SS0889E281D	CADM1_CADM1	CADM1	CADM1	Adhesion by CADM	0	0	0.4192	1.822	AD	sig	DAM1	Macrophage
CPI-SS0889E281D	CADM1_CADM1	CADM1	CADM1	Adhesion by CADM	0	0	0.398	0.892	AD	sig	DAM1	Monocyte
CPI-SS0889E281D	CADM1_CADM1	CADM1	CADM1	Adhesion by CADM	0	0	0.4377	2.635	AD	sig	DAM1	Proliferation
CPI-SS0889E281D	CADM1_CADM1	CADM1	CADM1	Adhesion by CADM	0	0	0.3777	0	AD	sig	DAM1	Tau Microglia
CPI-SS0889E281D	CADM1_CADM1	CADM1	CADM1	Adhesion by CADM	0	0	0.3954	0.776	AD	sig	Homeostasis 1	DAM1
CPI-SS0889E281D	CADM1_CADM1	CADM1	CADM1	Adhesion by CADM	0.0002	0.0024	0.3789	0.049	AD	sig	Homeostasis 2	DAM1
CPI-SS0889E281D	CADM1_CADM1	CADM1	CADM1	Adhesion by CADM	0	0	0.4842	4.679	AD	sig	Inflammation	DAM1
CPI-SS0889E281D	CADM1_CADM1	CADM1	CADM1	Adhesion by CADM	0	0	0.4376	3.255	AD	sig	Inflammation	Inflammation
CPI-SS0889E281D	CADM1_CADM1	CADM1	CADM1	Adhesion by CADM	0	0	0.374	1.309	AD	sig	Inflammation	T cell
CPI-SS0889E281D	CADM1_CADM1	CADM1	CADM1	Adhesion by CADM	0	0	0.4119	2.468	AD	sig	Inflammation	MHC 1
CPI-SS0889E281D	CADM1_CADM1	CADM1	CADM1	Adhesion by CADM	0	0	0.3726	1.268	AD	sig	Inflammation	Macrophage
CPI-SS0889E281D	CADM1_CADM1	CADM1	CADM1	Adhesion by CADM	0	0	0.3911	1.833	AD	sig	Inflammation	Proliferation
CPI-SS0889E281D	CADM1_CADM1	CADM1	CADM1	Adhesion by CADM	0	0	0.4206	1.882	AD	sig	T cell	DAM1
CPI-SS0889E281D	CADM1_CADM1	CADM1	CADM1	Adhesion by CADM	0	0	0.374	1.309	AD	sig	T cell	Inflammation
CPI-SS0889E281D	CADM1_CADM1	CADM1	CADM1	Adhesion by CADM	0	0	0.4584	3.548	AD	sig	MHC 1	DAM1
CPI-SS0889E281D	CADM1_CADM1	CADM1	CADM1	Adhesion by CADM	0	0	0.4119	2.468	AD	sig	MHC 1	Inflammation
CPI-SS0889E281D	CADM1_CADM1	CADM1	CADM1	Adhesion by CADM	0	0	0.3861	1.871	AD	sig	MHC 1	MHC 1
CPI-SS0889E281D	CADM1_CADM1	CADM1	CADM1	Adhesion by CADM	0	0	0.4192	1.822	AD	sig	Macrophage	DAM1
CPI-SS0889E281D	CADM1_CADM1	CADM1	CADM1	Adhesion by CADM	0	0	0.3726	1.268	AD	sig	Macrophage	Inflammation
CPI-SS0889E281D	CADM1_CADM1	CADM1	CADM1	Adhesion by CADM	0	0	0.398	0.892	AD	sig	Monocyte	DAM1
CPI-SS0889E281D	CADM1_CADM1	CADM1	CADM1	Adhesion by CADM	0	0	0.4377	2.635	AD	sig	Proliferation	DAM1
CPI-SS0889E281D	CADM1_CADM1	CADM1	CADM1	Adhesion by CADM	0	0	0.3911	1.833	AD	sig	Proliferation	Inflammation
CPI-SS0889E281D	CADM1_CADM1	CADM1	CADM1	Adhesion by CADM	0	0	0.3777	0	AD	sig	Tau Microglia	DAM1
CPI-SS09C06644C	CADM3_CADM1	CADM3	CADM1	Adhesion by CADM	0	0	0.2835	10.133	AD	sig	DAM1	DAM1
CPI-SS09C06644C	CADM3_CADM1	CADM3	CADM1	Adhesion by CADM	0	0	0.2369	7.049	AD	sig	DAM1	Inflammation
CPI-SS09C06644C	CADM3_CADM1	CADM3	CADM1	Adhesion by CADM	0	0	0.2112	5.344	AD	sig	DAM1	MHC 1
CPI-SS09C06644C	CADM3_CADM1	CADM3	CADM1	Adhesion by CADM	0	0	0.3117	25.936	AD	sig	Homeostasis 1	DAM1
CPI-SS09C06644C	CADM3_CADM1	CADM3	CADM1	Adhesion by CADM	0	0	0.2651	18.042	AD	sig	Homeostasis 1	Inflammation
CPI-SS09C06644C	CADM3_CADM1	CADM3	CADM1	Adhesion by CADM	0	0	0.2394	13.679	AD	sig	Homeostasis 1	MHC 1
CPI-SS09C06644C	CADM3_CADM1	CADM3	CADM1	Adhesion by CADM	0	0	0.2774	6.731	AD	sig	Homeostasis 2	DAM1
CPI-SS09C06644C	CADM3_CADM1	CADM3	CADM1	Adhesion by CADM	0	0	0.2308	4.682	AD	sig	Homeostasis 2	Inflammation
CPI-SS09C06644C	CADM3_CADM1	CADM3	CADM1	Adhesion by CADM	0	0	0.2747	5.208	AD	sig	Inflammation	DAM1
CPI-SS09C06644C	CADM3_CADM1	CADM3	CADM1	Adhesion by CADM	0	0	0.2281	3.623	AD	sig	Inflammation	Inflammation
CPI-SS09C06644C	CADM3_CADM1	CADM3	CADM1	Adhesion by CADM	0	0	0.2794	7.844	AD	sig	T cell	DAM1
CPI-SS09C06644C	CADM3_CADM1	CADM3	CADM1	Adhesion by CADM	0	0	0.2328	5.457	AD	sig	T cell	Inflammation
CPI-SS09C06644C	CADM3_CADM1	CADM3	CADM1	Adhesion by CADM	0.0029	0.0304	0.2071	4.137	AD	sig	T cell	MHC 1
CPI-SS09C06644C	CADM3_CADM1	CADM3	CADM1	Adhesion by CADM	0	0	0.292	14.882	AD	sig	MHC 1	DAM1
CPI-SS09C06644C	CADM3_CADM1	CADM3	CADM1	Adhesion by CADM	0	0	0.2454	10.353	AD	sig	MHC 1	Inflammation
CPI-SS09C06644C	CADM3_CADM1	CADM3	CADM1	Adhesion by CADM	0	0	0.2197	7.849	AD	sig	MHC 1	MHC 1
CPI-SS09C06644C	CADM3_CADM1	CADM3	CADM1	Adhesion by CADM	0	0	0.2958	17.038	AD	sig	MHC 2	DAM1
CPI-SS09C06644C	CADM3_CADM1	CADM3	CADM1	Adhesion by CADM	0	0	0.2492	11.853	AD	sig	MHC 2	Inflammation
CPI-SS09C06644C	CADM3_CADM1	CADM3	CADM1	Adhesion by CADM	0.002	0.0214	0.2235	8.986	AD	sig	MHC 2	MHC 1
CPI-SS09C06644C	CADM3_CADM1	CADM3	CADM1	Adhesion by CADM	0	0	0.2881	12.709	AD	sig	Macrophage	DAM1
CPI-SS09C06644C	CADM3_CADM1	CADM3	CADM1	Adhesion by CADM	0	0	0.2415	8.841	AD	sig	Macrophage	Inflammation
CPI-SS09C06644C	CADM3_CADM1	CADM3	CADM1	Adhesion by CADM	0	0	0.2158	6.703	AD	sig	Macrophage	MHC 1
CPI-SS09C06644C	CADM3_CADM1	CADM3	CADM1	Adhesion by CADM	0	0	0.2965	17.417	AD	sig	Monocyte	DAM1
CPI-SS09C06644C	CADM3_CADM1	CADM3	CADM1	Adhesion by CADM	0	0	0.2499	12.116	AD	sig	Monocyte	Inflammation
CPI-SS09C06644C	CADM3_CADM1	CADM3	CADM1	Adhesion by CADM	0	0	0.2242	9.186	AD	sig	Monocyte	MHC 1
CPI-SS09C06644C	CADM3_CADM1	CADM3	CADM1	Adhesion by CADM	0	0	0.3038	21.489	AD	sig	Proliferation	DAM1
CPI-SS09C06644C	CADM3_CADM1	CADM3	CADM1	Adhesion by CADM	0	0	0.2572	14.949	AD	sig	Proliferation	Inflammation
CPI-SS09C06644C	CADM3_CADM1	CADM3	CADM1	Adhesion by CADM	0	0	0.2315	11.333	AD	sig	Proliferation	MHC 1
CPI-SS09C06644C	CADM3_CADM1	CADM3	CADM1	Adhesion by CADM	0	0	0.2781	7.145	AD	sig	Tau Microglia	DAM1
CPI-SS09C06644C	CADM3_CADM1	CADM3	CADM1	Adhesion by CADM	0	0	0.2316	4.97	AD	sig	Tau Microglia	Inflammation
CPI-SS09C06644C	CADM3_CADM1	CADM3	CADM1	Adhesion by CADM	0.003	0.0313	0.2058	3.768	AD	sig	Tau Microglia	MHC 1
CPI-SS0C9696AAA	CRTAM_CADM1	CRTAM	CADM1		0	0	0.2914	25.936	AD	sig	T cell	DAM1
CPI-SS0C9696AAA	CRTAM_CADM1	CRTAM	CADM1		0	0	0.2449	18.042	AD	sig	T cell	Inflammation
CPI-SS0C9696AAA	CRTAM_CADM1	CRTAM	CADM1		0	0	0.2191	13.679	AD	sig	T cell	MHC 1
CPI-SS0B990492C	CADM1_NECTIN3	CADM1	NECTIN3	Adhesion by CADM	0	0	0.325	2.567	AD	sig	DAM1	DAM1
CPI-SS0B990492C	CADM1_NECTIN3	CADM1	NECTIN3	Adhesion by CADM	0	0	0.3855	6.653	AD	sig	DAM1	Homeostasis 1
CPI-SS0B990492C	CADM1_NECTIN3	CADM1	NECTIN3	Adhesion by CADM	0	0	0.3814	6.378	AD	sig	DAM1	Homeostasis 2
CPI-SS0B990492C	CADM1_NECTIN3	CADM1	NECTIN3	Adhesion by CADM	0	0	0.3495	4.223	AD	sig	DAM1	Inflammation
CPI-SS0B990492C	CADM1_NECTIN3	CADM1	NECTIN3	Adhesion by CADM	0	0	0.3213	2.31	AD	sig	DAM1	T cell
CPI-SS0B990492C	CADM1_NECTIN3	CADM1	NECTIN3	Adhesion by CADM	0	0	0.3409	3.636	AD	sig	DAM1	MHC 1
CPI-SS0B990492C	CADM1_NECTIN3	CADM1	NECTIN3	Adhesion by CADM	0	0	0.3479	4.114	AD	sig	DAM1	MHC 2
CPI-SS0B990492C	CADM1_NECTIN3	CADM1	NECTIN3	Adhesion by CADM	0	0	0.2928	0.383	AD	sig	DAM1	Macrophage
CPI-SS0B990492C	CADM1_NECTIN3	CADM1	NECTIN3	Adhesion by CADM	0.0002	0.0024	0.2871	0	AD	sig	DAM1	Monocyte
CPI-SS0B990492C	CADM1_NECTIN3	CADM1	NECTIN3	Adhesion by CADM	0	0	0.397	7.432	AD	sig	DAM1	Proliferation
CPI-SS0B990492C	CADM1_NECTIN3	CADM1	NECTIN3	Adhesion by CADM	0	0	0.343	3.78	AD	sig	DAM1	Tau Microglia
CPI-SS0B990492C	CADM1_NECTIN3	CADM1	NECTIN3	Adhesion by CADM	0.0001	0.0012	0.2785	1.785	AD	sig	Inflammation	DAM1
CPI-SS0B990492C	CADM1_NECTIN3	CADM1	NECTIN3	Adhesion by CADM	0	0	0.3389	4.628	AD	sig	Inflammation	Homeostasis 1
CPI-SS0B990492C	CADM1_NECTIN3	CADM1	NECTIN3	Adhesion by CADM	0	0	0.3348	4.437	AD	sig	Inflammation	Homeostasis 2
CPI-SS0B990492C	CADM1_NECTIN3	CADM1	NECTIN3	Adhesion by CADM	0	0	0.303	2.938	AD	sig	Inflammation	Inflammation
CPI-SS0B990492C	CADM1_NECTIN3	CADM1	NECTIN3	Adhesion by CADM	0	0	0.2943	2.529	AD	sig	Inflammation	MHC 1
CPI-SS0B990492C	CADM1_NECTIN3	CADM1	NECTIN3	Adhesion by CADM	0.0034	0.0352	0.3014	2.862	AD	sig	Inflammation	MHC 2
CPI-SS0B990492C	CADM1_NECTIN3	CADM1	NECTIN3	Adhesion by CADM	0	0	0.3504	5.17	AD	sig	Inflammation	Proliferation
CPI-SS0B990492C	CADM1_NECTIN3	CADM1	NECTIN3	Adhesion by CADM	0	0	0.2964	2.63	AD	sig	Inflammation	Tau Microglia
CPI-SS0B990492C	CADM1_NECTIN3	CADM1	NECTIN3	Adhesion by CADM	0.0001	0.0012	0.2753	1.861	AD	sig	T cell	Homeostasis 1
CPI-SS0B990492C	CADM1_NECTIN3	CADM1	NECTIN3	Adhesion by CADM	0.0002	0.0024	0.2868	2.079	AD	sig	T cell	Proliferation
CPI-SS0B990492C	CADM1_NECTIN3	CADM1	NECTIN3	Adhesion by CADM	0	0	0.3132	3.509	AD	sig	MHC 1	Homeostasis 1
CPI-SS0B990492C	CADM1_NECTIN3	CADM1	NECTIN3	Adhesion by CADM	0	0	0.3091	3.364	AD	sig	MHC 1	Homeostasis 2
CPI-SS0B990492C	CADM1_NECTIN3	CADM1	NECTIN3	Adhesion by CADM	0	0	0.2772	2.227	AD	sig	MHC 1	Inflammation
CPI-SS0B990492C	CADM1_NECTIN3	CADM1	NECTIN3	Adhesion by CADM	0	0	0.3247	3.919	AD	sig	MHC 1	Proliferation
CPI-SS0B990492C	CADM1_NECTIN3	CADM1	NECTIN3	Adhesion by CADM	0.0003	0.0035	0.2707	1.994	AD	sig	MHC 1	Tau Microglia
CPI-SS0B990492C	CADM1_NECTIN3	CADM1	NECTIN3	Adhesion by CADM	0.0005	0.0057	0.2739	1.802	AD	sig	Macrophage	Homeostasis 1
CPI-SS0B990492C	CADM1_NECTIN3	CADM1	NECTIN3	Adhesion by CADM	0.0011	0.0121	0.2854	2.013	AD	sig	Macrophage	Proliferation
CPI-SS0B990492C	CADM1_NECTIN3	CADM1	NECTIN3	Adhesion by CADM	0.0002	0.0024	0.2924	2.606	AD	sig	Proliferation	Homeostasis 1
CPI-SS0B990492C	CADM1_NECTIN3	CADM1	NECTIN3	Adhesion by CADM	0.0001	0.0012	0.3039	2.911	AD	sig	Proliferation	Proliferation
CPI-SS02FBD007E	NECTIN2_NECTIN3	NECTIN2	NECTIN3	Adhesion by Nectin	0	0	0.2079	17.829	AD	sig	Homeostasis 1	Proliferation
CPI-SS02FBD007E	NECTIN2_NECTIN3	NECTIN2	NECTIN3	Adhesion by Nectin	0	0	0.2232	21.585	AD	sig	Inflammation	Homeostasis 1
CPI-SS02FBD007E	NECTIN2_NECTIN3	NECTIN2	NECTIN3	Adhesion by Nectin	0	0	0.2192	20.693	AD	sig	Inflammation	Homeostasis 2
CPI-SS02FBD007E	NECTIN2_NECTIN3	NECTIN2	NECTIN3	Adhesion by Nectin	0	0	0.2347	24.111	AD	sig	Inflammation	Proliferation
CPI-SS02FBD007E	NECTIN2_NECTIN3	NECTIN2	NECTIN3	Adhesion by Nectin	0	0	0.2213	21.178	AD	sig	MHC 1	Homeostasis 1
CPI-SS02FBD007E	NECTIN2_NECTIN3	NECTIN2	NECTIN3	Adhesion by Nectin	0	0	0.2172	20.303	AD	sig	MHC 1	Homeostasis 2
CPI-SS02FBD007E	NECTIN2_NECTIN3	NECTIN2	NECTIN3	Adhesion by Nectin	0	0	0.2328	23.657	AD	sig	MHC 1	Proliferation
CPI-SS02FBD007E	NECTIN2_NECTIN3	NECTIN2	NECTIN3	Adhesion by Nectin	0.0002	0.0024	0.2034	16.788	AD	sig	MHC 2	Proliferation
CPI-SS02FBD007E	NECTIN2_NECTIN3	NECTIN2	NECTIN3	Adhesion by Nectin	0	0	0.2119	19.208	AD	sig	Macrophage	Homeostasis 1
CPI-SS02FBD007E	NECTIN2_NECTIN3	NECTIN2	NECTIN3	Adhesion by Nectin	0	0	0.2078	18.415	AD	sig	Macrophage	Homeostasis 2
CPI-SS02FBD007E	NECTIN2_NECTIN3	NECTIN2	NECTIN3	Adhesion by Nectin	0	0	0.2234	21.456	AD	sig	Macrophage	Proliferation
CPI-SS02FBD007E	NECTIN2_NECTIN3	NECTIN2	NECTIN3	Adhesion by Nectin	0	0	0.2142	19.699	AD	sig	Monocyte	Homeostasis 1
CPI-SS02FBD007E	NECTIN2_NECTIN3	NECTIN2	NECTIN3	Adhesion by Nectin	0	0	0.2102	18.886	AD	sig	Monocyte	Homeostasis 2
CPI-SS02FBD007E	NECTIN2_NECTIN3	NECTIN2	NECTIN3	Adhesion by Nectin	0	0	0.2257	22.005	AD	sig	Monocyte	Proliferation
CPI-SS02FBD007E	NECTIN2_NECTIN3	NECTIN2	NECTIN3	Adhesion by Nectin	0	0	0.2177	20.435	AD	sig	Proliferation	Homeostasis 1
CPI-SS02FBD007E	NECTIN2_NECTIN3	NECTIN2	NECTIN3	Adhesion by Nectin	0	0	0.2137	19.59	AD	sig	Proliferation	Homeostasis 2
CPI-SS02FBD007E	NECTIN2_NECTIN3	NECTIN2	NECTIN3	Adhesion by Nectin	0	0	0.2292	22.826	AD	sig	Proliferation	Proliferation
CPI-SS09C0B8677	TGM2_ADGRG1	TGM2	ADGRG1		0	0	0.5089	31.769	AD	sig	MHC 2	Homeostasis 1
CPI-SS09C0B8677	TGM2_ADGRG1	TGM2	ADGRG1		0.0001	0.0012	0.403	25.059	AD	sig	MHC 2	Homeostasis 2
CPI-SS09C0B8677	TGM2_ADGRG1	TGM2	ADGRG1		0.0001	0.0012	0.4681	29.185	AD	sig	MHC 2	MHC 2
CPI-SS09C0B8677	TGM2_ADGRG1	TGM2	ADGRG1		0	0	0.5184	71.569	AD	sig	Monocyte	Homeostasis 1
CPI-SS09C0B8677	TGM2_ADGRG1	TGM2	ADGRG1		0	0	0.4125	56.452	AD	sig	Monocyte	Homeostasis 2
CPI-SS09C0B8677	TGM2_ADGRG1	TGM2	ADGRG1		0	0	0.3783	51.567	AD	sig	Monocyte	MHC 1
CPI-SS09C0B8677	TGM2_ADGRG1	TGM2	ADGRG1		0	0	0.4776	65.749	AD	sig	Monocyte	MHC 2
CPI-SS015BF69EE	COL4A1_ADGRG6	COL4A1	ADGRG6	Adhesion by Collagen/Integrin	0	0	0.2598	10.077	AD	sig	Inflammation	Macrophage
CPI-SS01771D11B	COL4A2_ADGRG6	COL4A2	ADGRG6	Adhesion by Collagen/Integrin	0	0	0.2583	4.865	AD	sig	Homeostasis 1	Macrophage
CPI-SS01771D11B	COL4A2_ADGRG6	COL4A2	ADGRG6	Adhesion by Collagen/Integrin	0	0	0.2567	3.979	AD	sig	Homeostasis 2	Macrophage
CPI-SS01771D11B	COL4A2_ADGRG6	COL4A2	ADGRG6	Adhesion by Collagen/Integrin	0	0	0.2599	5.703	AD	sig	Inflammation	Macrophage
CPI-SS01771D11B	COL4A2_ADGRG6	COL4A2	ADGRG6	Adhesion by Collagen/Integrin	0	0	0.2581	4.771	AD	sig	MHC 1	Macrophage
CPI-SS01771D11B	COL4A2_ADGRG6	COL4A2	ADGRG6	Adhesion by Collagen/Integrin	0	0	0.2542	2.704	AD	sig	MHC 2	Macrophage
CPI-SS01771D11B	COL4A2_ADGRG6	COL4A2	ADGRG6	Adhesion by Collagen/Integrin	0	0	0.2606	6.059	AD	sig	Monocyte	Macrophage
CPI-SS0AADAB219	COL4A3_ADGRG6	COL4A3	ADGRG6	Adhesion by Collagen/Integrin	0	0	0.2601	21.741	AD	sig	Inflammation	Macrophage
CPI-SS0AADAB219	COL4A3_ADGRG6	COL4A3	ADGRG6	Adhesion by Collagen/Integrin	0	0	0.2747	50.986	AD	sig	T cell	Macrophage
CPI-SS0AADAB219	COL4A3_ADGRG6	COL4A3	ADGRG6	Adhesion by Collagen/Integrin	0	0	0.264	29.52	AD	sig	MHC 2	Macrophage
CPI-SS0AADAB219	COL4A3_ADGRG6	COL4A3	ADGRG6	Adhesion by Collagen/Integrin	0	0	0.2579	17.38	AD	sig	Monocyte	Macrophage
CPI-SS0AADAB219	COL4A3_ADGRG6	COL4A3	ADGRG6	Adhesion by Collagen/Integrin	0	0	0.2565	14.708	AD	sig	Proliferation	Macrophage
CPI-SS06D2944B5	COL4A4_ADGRG6	COL4A4	ADGRG6	Adhesion by Collagen/Integrin	0	0	0.2571	13.383	AD	sig	Homeostasis 1	Macrophage
CPI-SS06D2944B5	COL4A4_ADGRG6	COL4A4	ADGRG6	Adhesion by Collagen/Integrin	0	0	0.2649	26.36	AD	sig	Homeostasis 2	Macrophage
CPI-SS06D2944B5	COL4A4_ADGRG6	COL4A4	ADGRG6	Adhesion by Collagen/Integrin	0	0	0.2673	30.359	AD	sig	T cell	Macrophage
CPI-SS06D2944B5	COL4A4_ADGRG6	COL4A4	ADGRG6	Adhesion by Collagen/Integrin	0	0	0.2605	19.056	AD	sig	MHC 1	Macrophage
CPI-SS06D2944B5	COL4A4_ADGRG6	COL4A4	ADGRG6	Adhesion by Collagen/Integrin	0	0	0.2563	11.893	AD	sig	MHC 2	Macrophage
CPI-SS06D2944B5	COL4A4_ADGRG6	COL4A4	ADGRG6	Adhesion by Collagen/Integrin	0	0	0.2628	22.766	AD	sig	Tau Microglia	Macrophage
CPI-SS0924C61F1	COL4A5_ADGRG6	COL4A5	ADGRG6	Adhesion by Collagen/Integrin	0	0	0.2698	9.389	AD	sig	DAM1	Macrophage
CPI-SS0924C61F1	COL4A5_ADGRG6	COL4A5	ADGRG6	Adhesion by Collagen/Integrin	0	0	0.2638	6.67	AD	sig	Homeostasis 1	Macrophage
CPI-SS0924C61F1	COL4A5_ADGRG6	COL4A5	ADGRG6	Adhesion by Collagen/Integrin	0	0	0.2651	7.218	AD	sig	Homeostasis 2	Macrophage
CPI-SS0924C61F1	COL4A5_ADGRG6	COL4A5	ADGRG6	Adhesion by Collagen/Integrin	0	0	0.2706	9.74	AD	sig	Inflammation	Macrophage
CPI-SS0924C61F1	COL4A5_ADGRG6	COL4A5	ADGRG6	Adhesion by Collagen/Integrin	0	0	0.2756	12.021	AD	sig	T cell	Macrophage
CPI-SS0924C61F1	COL4A5_ADGRG6	COL4A5	ADGRG6	Adhesion by Collagen/Integrin	0	0	0.2609	5.314	AD	sig	MHC 1	Macrophage
CPI-SS0924C61F1	COL4A5_ADGRG6	COL4A5	ADGRG6	Adhesion by Collagen/Integrin	0	0	0.2669	8.069	AD	sig	MHC 2	Macrophage
CPI-SS0924C61F1	COL4A5_ADGRG6	COL4A5	ADGRG6	Adhesion by Collagen/Integrin	0	0	0.2707	9.76	AD	sig	Macrophage	Macrophage
CPI-SS0924C61F1	COL4A5_ADGRG6	COL4A5	ADGRG6	Adhesion by Collagen/Integrin	0	0	0.2655	7.426	AD	sig	Monocyte	Macrophage
CPI-SS0924C61F1	COL4A5_ADGRG6	COL4A5	ADGRG6	Adhesion by Collagen/Integrin	0	0	0.2604	5.106	AD	sig	Proliferation	Macrophage
CPI-SS0924C61F1	COL4A5_ADGRG6	COL4A5	ADGRG6	Adhesion by Collagen/Integrin	0	0	0.2721	10.42	AD	sig	Tau Microglia	Macrophage
CPI-SS0335C4DDE	LAMA2_ADGRG6	LAMA2	ADGRG6		0	0	0.304	11.372	AD	sig	DAM1	Macrophage
CPI-SS0335C4DDE	LAMA2_ADGRG6	LAMA2	ADGRG6		0	0	0.2955	9.601	AD	sig	Homeostasis 1	Macrophage
CPI-SS0335C4DDE	LAMA2_ADGRG6	LAMA2	ADGRG6		0	0	0.3018	10.914	AD	sig	Homeostasis 2	Macrophage
CPI-SS0335C4DDE	LAMA2_ADGRG6	LAMA2	ADGRG6		0	0	0.2774	5.858	AD	sig	Inflammation	Macrophage
CPI-SS0335C4DDE	LAMA2_ADGRG6	LAMA2	ADGRG6		0	0	0.3156	13.771	AD	sig	T cell	Macrophage
CPI-SS0335C4DDE	LAMA2_ADGRG6	LAMA2	ADGRG6		0	0	0.2952	9.54	AD	sig	MHC 1	Macrophage
CPI-SS0335C4DDE	LAMA2_ADGRG6	LAMA2	ADGRG6		0	0	0.2837	7.172	AD	sig	MHC 2	Macrophage
CPI-SS0335C4DDE	LAMA2_ADGRG6	LAMA2	ADGRG6		0	0	0.3156	13.763	AD	sig	Macrophage	Macrophage
CPI-SS0335C4DDE	LAMA2_ADGRG6	LAMA2	ADGRG6		0	0	0.2878	8.011	AD	sig	Monocyte	Macrophage
CPI-SS0335C4DDE	LAMA2_ADGRG6	LAMA2	ADGRG6		0	0	0.2942	9.328	AD	sig	Proliferation	Macrophage
CPI-SS0335C4DDE	LAMA2_ADGRG6	LAMA2	ADGRG6		0	0	0.3131	13.257	AD	sig	Tau Microglia	Macrophage
CPI-SS0087B834D	PRNP_ADGRG6	PRNP	ADGRG6		0	0	0.3491	6.196	AD	sig	DAM1	Macrophage
CPI-SS0087B834D	PRNP_ADGRG6	PRNP	ADGRG6		0	0	0.2725	4.386	AD	sig	Homeostasis 1	DAM1
CPI-SS0087B834D	PRNP_ADGRG6	PRNP	ADGRG6		0	0	0.2533	3.258	AD	sig	Homeostasis 1	Homeostasis 1
CPI-SS0087B834D	PRNP_ADGRG6	PRNP	ADGRG6		0	0	0.2442	2.724	AD	sig	Homeostasis 1	Homeostasis 2
CPI-SS0087B834D	PRNP_ADGRG6	PRNP	ADGRG6		0	0	0.2212	1.368	AD	sig	Homeostasis 1	Inflammation
CPI-SS0087B834D	PRNP_ADGRG6	PRNP	ADGRG6		0	0	0.2732	4.431	AD	sig	Homeostasis 1	MHC 1
CPI-SS0087B834D	PRNP_ADGRG6	PRNP	ADGRG6		0	0	0.4471	14.67	AD	sig	Homeostasis 1	Macrophage
CPI-SS0087B834D	PRNP_ADGRG6	PRNP	ADGRG6		0	0	0.2771	4.66	AD	sig	Homeostasis 1	Proliferation
CPI-SS0087B834D	PRNP_ADGRG6	PRNP	ADGRG6		0	0	0.2579	3.527	AD	sig	Homeostasis 1	Tau Microglia
CPI-SS0087B834D	PRNP_ADGRG6	PRNP	ADGRG6		0	0	0.3518	6.431	AD	sig	Homeostasis 2	Macrophage
CPI-SS0087B834D	PRNP_ADGRG6	PRNP	ADGRG6		0	0	0.2775	0	AD	sig	Inflammation	Macrophage
CPI-SS0087B834D	PRNP_ADGRG6	PRNP	ADGRG6		0	0	0.3215	3.806	AD	sig	T cell	Macrophage
CPI-SS0087B834D	PRNP_ADGRG6	PRNP	ADGRG6		0	0	0.2236	3.123	AD	sig	MHC 1	DAM1
CPI-SS0087B834D	PRNP_ADGRG6	PRNP	ADGRG6		0	0	0.2243	3.155	AD	sig	MHC 1	MHC 1
CPI-SS0087B834D	PRNP_ADGRG6	PRNP	ADGRG6		0	0	0.3982	10.444	AD	sig	MHC 1	Macrophage
CPI-SS0087B834D	PRNP_ADGRG6	PRNP	ADGRG6		0	0	0.2282	3.317	AD	sig	MHC 1	Proliferation
CPI-SS0087B834D	PRNP_ADGRG6	PRNP	ADGRG6		0	0	0.209	2.511	AD	sig	MHC 1	Tau Microglia
CPI-SS0087B834D	PRNP_ADGRG6	PRNP	ADGRG6		0.0049	0.0497	0.243	3.642	AD	sig	MHC 2	MHC 1
CPI-SS0087B834D	PRNP_ADGRG6	PRNP	ADGRG6		0	0	0.4169	12.056	AD	sig	MHC 2	Macrophage
CPI-SS0087B834D	PRNP_ADGRG6	PRNP	ADGRG6		0.0036	0.0372	0.2469	3.829	AD	sig	MHC 2	Proliferation
CPI-SS0087B834D	PRNP_ADGRG6	PRNP	ADGRG6		0	0	0.3746	8.404	AD	sig	Macrophage	Macrophage
CPI-SS0087B834D	PRNP_ADGRG6	PRNP	ADGRG6		0	0	0.3869	9.464	AD	sig	Monocyte	Macrophage
CPI-SS0087B834D	PRNP_ADGRG6	PRNP	ADGRG6		0.0001	0.0012	0.2326	3.356	AD	sig	Proliferation	DAM1
CPI-SS0087B834D	PRNP_ADGRG6	PRNP	ADGRG6		0.0001	0.0012	0.2334	3.391	AD	sig	Proliferation	MHC 1
CPI-SS0087B834D	PRNP_ADGRG6	PRNP	ADGRG6		0	0	0.4073	11.226	AD	sig	Proliferation	Macrophage
CPI-SS0087B834D	PRNP_ADGRG6	PRNP	ADGRG6		0	0	0.2373	3.566	AD	sig	Proliferation	Proliferation
CPI-SS0087B834D	PRNP_ADGRG6	PRNP	ADGRG6		0	0	0.3237	4.001	AD	sig	Tau Microglia	Macrophage
CPI-SS0D9DE7106	DAG1_NRXN3	DAG1	NRXN3		0	0	0.3619	23.526	AD	sig	DAM1	Homeostasis 1
CPI-SS0D9DE7106	DAG1_NRXN3	DAG1	NRXN3		0	0	0.334	21.225	AD	sig	DAM1	Proliferation
CPI-SS0D9DE7106	DAG1_NRXN3	DAG1	NRXN3		0	0	0.3619	23.569	AD	sig	Homeostasis 1	Homeostasis 1
CPI-SS0D9DE7106	DAG1_NRXN3	DAG1	NRXN3		0	0	0.334	21.263	AD	sig	Homeostasis 1	Proliferation
CPI-SS0D9DE7106	DAG1_NRXN3	DAG1	NRXN3		0	0	0.3599	21.798	AD	sig	Homeostasis 2	Homeostasis 1
CPI-SS0D9DE7106	DAG1_NRXN3	DAG1	NRXN3		0	0	0.332	19.666	AD	sig	Homeostasis 2	Proliferation
CPI-SS0D9DE7106	DAG1_NRXN3	DAG1	NRXN3		0	0	0.3466	10.4	AD	sig	Inflammation	Homeostasis 1
CPI-SS0D9DE7106	DAG1_NRXN3	DAG1	NRXN3		0	0	0.3188	9.383	AD	sig	Inflammation	Proliferation
CPI-SS0D9DE7106	DAG1_NRXN3	DAG1	NRXN3		0	0	0.3697	30.237	AD	sig	T cell	Homeostasis 1
CPI-SS0D9DE7106	DAG1_NRXN3	DAG1	NRXN3		0	0	0.3418	27.279	AD	sig	T cell	Proliferation
CPI-SS0D9DE7106	DAG1_NRXN3	DAG1	NRXN3		0	0	0.361	22.764	AD	sig	MHC 1	Homeostasis 1
CPI-SS0D9DE7106	DAG1_NRXN3	DAG1	NRXN3		0	0	0.3331	20.537	AD	sig	MHC 1	Proliferation
CPI-SS0D9DE7106	DAG1_NRXN3	DAG1	NRXN3		0	0	0.3616	23.29	AD	sig	MHC 2	Homeostasis 1
CPI-SS0D9DE7106	DAG1_NRXN3	DAG1	NRXN3		0	0	0.3337	21.012	AD	sig	MHC 2	Proliferation
CPI-SS0D9DE7106	DAG1_NRXN3	DAG1	NRXN3		0	0	0.361	22.754	AD	sig	Macrophage	Homeostasis 1
CPI-SS0D9DE7106	DAG1_NRXN3	DAG1	NRXN3		0	0	0.3331	20.529	AD	sig	Macrophage	Proliferation
CPI-SS0D9DE7106	DAG1_NRXN3	DAG1	NRXN3		0	0	0.3743	34.24	AD	sig	Monocyte	Homeostasis 1
CPI-SS0D9DE7106	DAG1_NRXN3	DAG1	NRXN3		0	0	0.3464	30.891	AD	sig	Monocyte	Proliferation
CPI-SS0D9DE7106	DAG1_NRXN3	DAG1	NRXN3		0	0	0.3878	45.836	AD	sig	Proliferation	Homeostasis 1
CPI-SS0D9DE7106	DAG1_NRXN3	DAG1	NRXN3		0.0001	0.0012	0.2636	25.865	AD	sig	Proliferation	MHC 1
CPI-SS0D9DE7106	DAG1_NRXN3	DAG1	NRXN3		0.0006	0.0068	0.2806	28.601	AD	sig	Proliferation	Monocyte
CPI-SS0D9DE7106	DAG1_NRXN3	DAG1	NRXN3		0	0	0.3599	41.352	AD	sig	Proliferation	Proliferation
CPI-SS0D9DE7106	DAG1_NRXN3	DAG1	NRXN3		0	0	0.3601	22.036	AD	sig	Tau Microglia	Homeostasis 1
CPI-SS0D9DE7106	DAG1_NRXN3	DAG1	NRXN3		0	0	0.3323	19.881	AD	sig	Tau Microglia	Proliferation
CPI-SS0DD3733E8	CLSTN1_NRXN3	CLSTN1	NRXN3	Signaling by Calsyntenin	0	0	0.4906	10.847	AD	sig	DAM1	Homeostasis 1
CPI-SS0DD3733E8	CLSTN1_NRXN3	CLSTN1	NRXN3	Signaling by Calsyntenin	0	0	0.4627	9.786	AD	sig	DAM1	Proliferation
CPI-SS0DD3733E8	CLSTN1_NRXN3	CLSTN1	NRXN3	Signaling by Calsyntenin	0	0	0.5577	27.884	AD	sig	Homeostasis 1	Homeostasis 1
CPI-SS0DD3733E8	CLSTN1_NRXN3	CLSTN1	NRXN3	Signaling by Calsyntenin	0	0	0.4335	15.735	AD	sig	Homeostasis 1	MHC 1
CPI-SS0DD3733E8	CLSTN1_NRXN3	CLSTN1	NRXN3	Signaling by Calsyntenin	0	0	0.4506	17.399	AD	sig	Homeostasis 1	Monocyte
CPI-SS0DD3733E8	CLSTN1_NRXN3	CLSTN1	NRXN3	Signaling by Calsyntenin	0	0	0.5299	25.157	AD	sig	Homeostasis 1	Proliferation
CPI-SS0DD3733E8	CLSTN1_NRXN3	CLSTN1	NRXN3	Signaling by Calsyntenin	0	0	0.5236	19.234	AD	sig	Homeostasis 2	Homeostasis 1
CPI-SS0DD3733E8	CLSTN1_NRXN3	CLSTN1	NRXN3	Signaling by Calsyntenin	0	0	0.4958	17.352	AD	sig	Homeostasis 2	Proliferation
CPI-SS0DD3733E8	CLSTN1_NRXN3	CLSTN1	NRXN3	Signaling by Calsyntenin	0	0	0.4581	2.59	AD	sig	Inflammation	Homeostasis 1
CPI-SS0DD3733E8	CLSTN1_NRXN3	CLSTN1	NRXN3	Signaling by Calsyntenin	0	0	0.495	11.957	AD	sig	T cell	Homeostasis 1
CPI-SS0DD3733E8	CLSTN1_NRXN3	CLSTN1	NRXN3	Signaling by Calsyntenin	0	0	0.4671	10.788	AD	sig	T cell	Proliferation
CPI-SS0DD3733E8	CLSTN1_NRXN3	CLSTN1	NRXN3	Signaling by Calsyntenin	0	0	0.5228	19.031	AD	sig	MHC 1	Homeostasis 1
CPI-SS0DD3733E8	CLSTN1_NRXN3	CLSTN1	NRXN3	Signaling by Calsyntenin	0	0	0.495	17.17	AD	sig	MHC 1	Proliferation
CPI-SS0DD3733E8	CLSTN1_NRXN3	CLSTN1	NRXN3	Signaling by Calsyntenin	0	0	0.5096	15.661	AD	sig	MHC 2	Homeostasis 1
CPI-SS0DD3733E8	CLSTN1_NRXN3	CLSTN1	NRXN3	Signaling by Calsyntenin	0.0003	0.0035	0.4817	14.129	AD	sig	MHC 2	Proliferation
CPI-SS0DD3733E8	CLSTN1_NRXN3	CLSTN1	NRXN3	Signaling by Calsyntenin	0	0	0.4478	0	AD	sig	Macrophage	Homeostasis 1
CPI-SS0DD3733E8	CLSTN1_NRXN3	CLSTN1	NRXN3	Signaling by Calsyntenin	0	0	0.4794	8.009	AD	sig	Monocyte	Homeostasis 1
CPI-SS0DD3733E8	CLSTN1_NRXN3	CLSTN1	NRXN3	Signaling by Calsyntenin	0.0002	0.0024	0.4515	7.226	AD	sig	Monocyte	Proliferation
CPI-SS0DD3733E8	CLSTN1_NRXN3	CLSTN1	NRXN3	Signaling by Calsyntenin	0	0	0.5601	28.489	AD	sig	Proliferation	Homeostasis 1
CPI-SS0DD3733E8	CLSTN1_NRXN3	CLSTN1	NRXN3	Signaling by Calsyntenin	0	0	0.4359	16.077	AD	sig	Proliferation	MHC 1
CPI-SS0DD3733E8	CLSTN1_NRXN3	CLSTN1	NRXN3	Signaling by Calsyntenin	0.0001	0.0012	0.4529	17.777	AD	sig	Proliferation	Monocyte
CPI-SS0DD3733E8	CLSTN1_NRXN3	CLSTN1	NRXN3	Signaling by Calsyntenin	0	0	0.5322	25.703	AD	sig	Proliferation	Proliferation
CPI-SS0DD3733E8	CLSTN1_NRXN3	CLSTN1	NRXN3	Signaling by Calsyntenin	0	0	0.5027	13.926	AD	sig	Tau Microglia	Homeostasis 1
CPI-SS0DD3733E8	CLSTN1_NRXN3	CLSTN1	NRXN3	Signaling by Calsyntenin	0	0	0.4748	12.564	AD	sig	Tau Microglia	Proliferation
CPI-SS01A7DC3C1	CLSTN2_NRXN3	CLSTN2	NRXN3	Signaling by Calsyntenin	0	0	0.3615	15.811	AD	sig	DAM1	Homeostasis 1
CPI-SS01A7DC3C1	CLSTN2_NRXN3	CLSTN2	NRXN3	Signaling by Calsyntenin	0	0	0.3336	14.264	AD	sig	DAM1	Proliferation
CPI-SS01A7DC3C1	CLSTN2_NRXN3	CLSTN2	NRXN3	Signaling by Calsyntenin	0	0	0.3988	37.756	AD	sig	Homeostasis 1	Homeostasis 1
CPI-SS01A7DC3C1	CLSTN2_NRXN3	CLSTN2	NRXN3	Signaling by Calsyntenin	0	0	0.2747	21.306	AD	sig	Homeostasis 1	MHC 1
CPI-SS01A7DC3C1	CLSTN2_NRXN3	CLSTN2	NRXN3	Signaling by Calsyntenin	0.0011	0.0121	0.2917	23.559	AD	sig	Homeostasis 1	Monocyte
CPI-SS01A7DC3C1	CLSTN2_NRXN3	CLSTN2	NRXN3	Signaling by Calsyntenin	0	0	0.371	34.063	AD	sig	Homeostasis 1	Proliferation
CPI-SS01A7DC3C1	CLSTN2_NRXN3	CLSTN2	NRXN3	Signaling by Calsyntenin	0	0	0.3678	19.522	AD	sig	Homeostasis 2	Homeostasis 1
CPI-SS01A7DC3C1	CLSTN2_NRXN3	CLSTN2	NRXN3	Signaling by Calsyntenin	0	0	0.3399	17.613	AD	sig	Homeostasis 2	Proliferation
CPI-SS01A7DC3C1	CLSTN2_NRXN3	CLSTN2	NRXN3	Signaling by Calsyntenin	0	0	0.3459	6.63	AD	sig	Inflammation	Homeostasis 1
CPI-SS01A7DC3C1	CLSTN2_NRXN3	CLSTN2	NRXN3	Signaling by Calsyntenin	0	0	0.318	5.982	AD	sig	Inflammation	Proliferation
CPI-SS01A7DC3C1	CLSTN2_NRXN3	CLSTN2	NRXN3	Signaling by Calsyntenin	0	0	0.3594	14.593	AD	sig	T cell	Homeostasis 1
CPI-SS01A7DC3C1	CLSTN2_NRXN3	CLSTN2	NRXN3	Signaling by Calsyntenin	0	0	0.3315	13.165	AD	sig	T cell	Proliferation
CPI-SS01A7DC3C1	CLSTN2_NRXN3	CLSTN2	NRXN3	Signaling by Calsyntenin	0	0	0.3754	23.976	AD	sig	MHC 1	Homeostasis 1
CPI-SS01A7DC3C1	CLSTN2_NRXN3	CLSTN2	NRXN3	Signaling by Calsyntenin	0	0	0.3475	21.631	AD	sig	MHC 1	Proliferation
CPI-SS01A7DC3C1	CLSTN2_NRXN3	CLSTN2	NRXN3	Signaling by Calsyntenin	0	0	0.3756	24.131	AD	sig	MHC 2	Homeostasis 1
CPI-SS01A7DC3C1	CLSTN2_NRXN3	CLSTN2	NRXN3	Signaling by Calsyntenin	0	0	0.3478	21.77	AD	sig	MHC 2	Proliferation
CPI-SS01A7DC3C1	CLSTN2_NRXN3	CLSTN2	NRXN3	Signaling by Calsyntenin	0	0	0.3681	19.722	AD	sig	Macrophage	Homeostasis 1
CPI-SS01A7DC3C1	CLSTN2_NRXN3	CLSTN2	NRXN3	Signaling by Calsyntenin	0	0	0.3403	17.793	AD	sig	Macrophage	Proliferation
CPI-SS01A7DC3C1	CLSTN2_NRXN3	CLSTN2	NRXN3	Signaling by Calsyntenin	0	0	0.3781	25.565	AD	sig	Monocyte	Homeostasis 1
CPI-SS01A7DC3C1	CLSTN2_NRXN3	CLSTN2	NRXN3	Signaling by Calsyntenin	0	0	0.3502	23.065	AD	sig	Monocyte	Proliferation
CPI-SS01A7DC3C1	CLSTN2_NRXN3	CLSTN2	NRXN3	Signaling by Calsyntenin	0	0	0.389	31.999	AD	sig	Proliferation	Homeostasis 1
CPI-SS01A7DC3C1	CLSTN2_NRXN3	CLSTN2	NRXN3	Signaling by Calsyntenin	0	0	0.3612	28.869	AD	sig	Proliferation	Proliferation
CPI-SS01A7DC3C1	CLSTN2_NRXN3	CLSTN2	NRXN3	Signaling by Calsyntenin	0	0	0.3515	9.965	AD	sig	Tau Microglia	Homeostasis 1
CPI-SS01A7DC3C1	CLSTN2_NRXN3	CLSTN2	NRXN3	Signaling by Calsyntenin	0	0	0.3237	8.99	AD	sig	Tau Microglia	Proliferation
CPI-SS0180FFBED	CLSTN3_NRXN3	CLSTN3	NRXN3	Signaling by Calsyntenin	0	0	0.3612	16.559	AD	sig	DAM1	Homeostasis 1
CPI-SS0180FFBED	CLSTN3_NRXN3	CLSTN3	NRXN3	Signaling by Calsyntenin	0	0	0.3333	14.94	AD	sig	DAM1	Proliferation
CPI-SS0180FFBED	CLSTN3_NRXN3	CLSTN3	NRXN3	Signaling by Calsyntenin	0	0	0.4068	44.955	AD	sig	Homeostasis 1	Homeostasis 1
CPI-SS0180FFBED	CLSTN3_NRXN3	CLSTN3	NRXN3	Signaling by Calsyntenin	0	0	0.2826	25.368	AD	sig	Homeostasis 1	MHC 1
CPI-SS0180FFBED	CLSTN3_NRXN3	CLSTN3	NRXN3	Signaling by Calsyntenin	0.0001	0.0012	0.2996	28.051	AD	sig	Homeostasis 1	Monocyte
CPI-SS0180FFBED	CLSTN3_NRXN3	CLSTN3	NRXN3	Signaling by Calsyntenin	0	0	0.3789	40.557	AD	sig	Homeostasis 1	Proliferation
CPI-SS0180FFBED	CLSTN3_NRXN3	CLSTN3	NRXN3	Signaling by Calsyntenin	0	0	0.3574	14.186	AD	sig	Homeostasis 2	Homeostasis 1
CPI-SS0180FFBED	CLSTN3_NRXN3	CLSTN3	NRXN3	Signaling by Calsyntenin	0	0	0.3295	12.799	AD	sig	Homeostasis 2	Proliferation
CPI-SS0180FFBED	CLSTN3_NRXN3	CLSTN3	NRXN3	Signaling by Calsyntenin	0	0	0.3617	16.904	AD	sig	Inflammation	Homeostasis 1
CPI-SS0180FFBED	CLSTN3_NRXN3	CLSTN3	NRXN3	Signaling by Calsyntenin	0	0	0.3339	15.251	AD	sig	Inflammation	Proliferation
CPI-SS0180FFBED	CLSTN3_NRXN3	CLSTN3	NRXN3	Signaling by Calsyntenin	0	0	0.4327	61.035	AD	sig	T cell	Homeostasis 1
CPI-SS0180FFBED	CLSTN3_NRXN3	CLSTN3	NRXN3	Signaling by Calsyntenin	0	0	0.3085	34.442	AD	sig	T cell	MHC 1
CPI-SS0180FFBED	CLSTN3_NRXN3	CLSTN3	NRXN3	Signaling by Calsyntenin	0	0	0.3255	38.085	AD	sig	T cell	Monocyte
CPI-SS0180FFBED	CLSTN3_NRXN3	CLSTN3	NRXN3	Signaling by Calsyntenin	0	0	0.4048	55.065	AD	sig	T cell	Proliferation
CPI-SS0180FFBED	CLSTN3_NRXN3	CLSTN3	NRXN3	Signaling by Calsyntenin	0	0	0.3787	27.453	AD	sig	MHC 1	Homeostasis 1
CPI-SS0180FFBED	CLSTN3_NRXN3	CLSTN3	NRXN3	Signaling by Calsyntenin	0	0	0.3508	24.768	AD	sig	MHC 1	Proliferation
CPI-SS0180FFBED	CLSTN3_NRXN3	CLSTN3	NRXN3	Signaling by Calsyntenin	0	0	0.3751	25.216	AD	sig	MHC 2	Homeostasis 1
CPI-SS0180FFBED	CLSTN3_NRXN3	CLSTN3	NRXN3	Signaling by Calsyntenin	0	0	0.3472	22.749	AD	sig	MHC 2	Proliferation
CPI-SS0180FFBED	CLSTN3_NRXN3	CLSTN3	NRXN3	Signaling by Calsyntenin	0	0	0.3609	16.362	AD	sig	Macrophage	Homeostasis 1
CPI-SS0180FFBED	CLSTN3_NRXN3	CLSTN3	NRXN3	Signaling by Calsyntenin	0	0	0.333	14.761	AD	sig	Macrophage	Proliferation
CPI-SS0180FFBED	CLSTN3_NRXN3	CLSTN3	NRXN3	Signaling by Calsyntenin	0	0	0.4003	40.93	AD	sig	Monocyte	Homeostasis 1
CPI-SS0180FFBED	CLSTN3_NRXN3	CLSTN3	NRXN3	Signaling by Calsyntenin	0.0046	0.0469	0.2762	23.097	AD	sig	Monocyte	MHC 1
CPI-SS0180FFBED	CLSTN3_NRXN3	CLSTN3	NRXN3	Signaling by Calsyntenin	0.0028	0.0294	0.2932	25.54	AD	sig	Monocyte	Monocyte
CPI-SS0180FFBED	CLSTN3_NRXN3	CLSTN3	NRXN3	Signaling by Calsyntenin	0	0	0.3725	36.927	AD	sig	Monocyte	Proliferation
CPI-SS0180FFBED	CLSTN3_NRXN3	CLSTN3	NRXN3	Signaling by Calsyntenin	0	0	0.3905	34.83	AD	sig	Proliferation	Homeostasis 1
CPI-SS0180FFBED	CLSTN3_NRXN3	CLSTN3	NRXN3	Signaling by Calsyntenin	0	0	0.3627	31.424	AD	sig	Proliferation	Proliferation
CPI-SS0180FFBED	CLSTN3_NRXN3	CLSTN3	NRXN3	Signaling by Calsyntenin	0	0	0.3526	11.246	AD	sig	Tau Microglia	Homeostasis 1
CPI-SS0180FFBED	CLSTN3_NRXN3	CLSTN3	NRXN3	Signaling by Calsyntenin	0	0	0.3248	10.146	AD	sig	Tau Microglia	Proliferation
CPI-SS0C0329180	LRRTM2_NRXN3	LRRTM2	NRXN3	Signaling by Leucine-Rich Repeat Transmembrane Neuronal Protein	0	0	0.3506	61.035	AD	sig	Homeostasis 1	Homeostasis 1
CPI-SS0C0329180	LRRTM2_NRXN3	LRRTM2	NRXN3	Signaling by Leucine-Rich Repeat Transmembrane Neuronal Protein	0	0	0.3227	55.065	AD	sig	Homeostasis 1	Proliferation
CPI-SS0C0329180	LRRTM2_NRXN3	LRRTM2	NRXN3	Signaling by Leucine-Rich Repeat Transmembrane Neuronal Protein	0	0	0.3448	39.17	AD	sig	MHC 1	Homeostasis 1
CPI-SS0C0329180	LRRTM2_NRXN3	LRRTM2	NRXN3	Signaling by Leucine-Rich Repeat Transmembrane Neuronal Protein	0	0	0.317	35.339	AD	sig	MHC 1	Proliferation
CPI-SS0C0329180	LRRTM2_NRXN3	LRRTM2	NRXN3	Signaling by Leucine-Rich Repeat Transmembrane Neuronal Protein	0	0	0.3424	29.734	AD	sig	Macrophage	Homeostasis 1
CPI-SS0C0329180	LRRTM2_NRXN3	LRRTM2	NRXN3	Signaling by Leucine-Rich Repeat Transmembrane Neuronal Protein	0	0	0.3145	26.825	AD	sig	Macrophage	Proliferation
CPI-SS0C0329180	LRRTM2_NRXN3	LRRTM2	NRXN3	Signaling by Leucine-Rich Repeat Transmembrane Neuronal Protein	0	0	0.3424	29.749	AD	sig	Monocyte	Homeostasis 1
CPI-SS0C0329180	LRRTM2_NRXN3	LRRTM2	NRXN3	Signaling by Leucine-Rich Repeat Transmembrane Neuronal Protein	0	0	0.3145	26.84	AD	sig	Monocyte	Proliferation
CPI-SS0C0329180	LRRTM2_NRXN3	LRRTM2	NRXN3	Signaling by Leucine-Rich Repeat Transmembrane Neuronal Protein	0	0	0.3484	52.839	AD	sig	Proliferation	Homeostasis 1
CPI-SS0C0329180	LRRTM2_NRXN3	LRRTM2	NRXN3	Signaling by Leucine-Rich Repeat Transmembrane Neuronal Protein	0	0	0.3205	47.67	AD	sig	Proliferation	Proliferation
CPI-SS026EC3854	LRRTM3_NRXN3	LRRTM3	NRXN3	Signaling by Leucine-Rich Repeat Transmembrane Neuronal Protein	0	0	0.3725	19.244	AD	sig	DAM1	Homeostasis 1
CPI-SS026EC3854	LRRTM3_NRXN3	LRRTM3	NRXN3	Signaling by Leucine-Rich Repeat Transmembrane Neuronal Protein	0	0	0.3446	17.362	AD	sig	DAM1	Proliferation
CPI-SS026EC3854	LRRTM3_NRXN3	LRRTM3	NRXN3	Signaling by Leucine-Rich Repeat Transmembrane Neuronal Protein	0	0	0.4128	39.687	AD	sig	Homeostasis 1	Homeostasis 1
CPI-SS026EC3854	LRRTM3_NRXN3	LRRTM3	NRXN3	Signaling by Leucine-Rich Repeat Transmembrane Neuronal Protein	0	0	0.2886	22.396	AD	sig	Homeostasis 1	MHC 1
CPI-SS026EC3854	LRRTM3_NRXN3	LRRTM3	NRXN3	Signaling by Leucine-Rich Repeat Transmembrane Neuronal Protein	0.0005	0.0057	0.3056	24.764	AD	sig	Homeostasis 1	Monocyte
CPI-SS026EC3854	LRRTM3_NRXN3	LRRTM3	NRXN3	Signaling by Leucine-Rich Repeat Transmembrane Neuronal Protein	0	0	0.3849	35.805	AD	sig	Homeostasis 1	Proliferation
CPI-SS026EC3854	LRRTM3_NRXN3	LRRTM3	NRXN3	Signaling by Leucine-Rich Repeat Transmembrane Neuronal Protein	0	0	0.3797	22.907	AD	sig	Homeostasis 2	Homeostasis 1
CPI-SS026EC3854	LRRTM3_NRXN3	LRRTM3	NRXN3	Signaling by Leucine-Rich Repeat Transmembrane Neuronal Protein	0	0	0.3518	20.666	AD	sig	Homeostasis 2	Proliferation
CPI-SS026EC3854	LRRTM3_NRXN3	LRRTM3	NRXN3	Signaling by Leucine-Rich Repeat Transmembrane Neuronal Protein	0	0	0.3541	9.901	AD	sig	Inflammation	Homeostasis 1
CPI-SS026EC3854	LRRTM3_NRXN3	LRRTM3	NRXN3	Signaling by Leucine-Rich Repeat Transmembrane Neuronal Protein	0	0	0.3262	8.933	AD	sig	Inflammation	Proliferation
CPI-SS026EC3854	LRRTM3_NRXN3	LRRTM3	NRXN3	Signaling by Leucine-Rich Repeat Transmembrane Neuronal Protein	0	0	0.3613	13.551	AD	sig	T cell	Homeostasis 1
CPI-SS026EC3854	LRRTM3_NRXN3	LRRTM3	NRXN3	Signaling by Leucine-Rich Repeat Transmembrane Neuronal Protein	0	0	0.3334	12.226	AD	sig	T cell	Proliferation
CPI-SS026EC3854	LRRTM3_NRXN3	LRRTM3	NRXN3	Signaling by Leucine-Rich Repeat Transmembrane Neuronal Protein	0	0	0.3816	23.844	AD	sig	MHC 1	Homeostasis 1
CPI-SS026EC3854	LRRTM3_NRXN3	LRRTM3	NRXN3	Signaling by Leucine-Rich Repeat Transmembrane Neuronal Protein	0	0	0.3537	21.511	AD	sig	MHC 1	Proliferation
CPI-SS026EC3854	LRRTM3_NRXN3	LRRTM3	NRXN3	Signaling by Leucine-Rich Repeat Transmembrane Neuronal Protein	0	0	0.3768	21.4	AD	sig	MHC 2	Homeostasis 1
CPI-SS026EC3854	LRRTM3_NRXN3	LRRTM3	NRXN3	Signaling by Leucine-Rich Repeat Transmembrane Neuronal Protein	0	0	0.3489	19.307	AD	sig	MHC 2	Proliferation
CPI-SS026EC3854	LRRTM3_NRXN3	LRRTM3	NRXN3	Signaling by Leucine-Rich Repeat Transmembrane Neuronal Protein	0	0	0.3728	19.384	AD	sig	Macrophage	Homeostasis 1
CPI-SS026EC3854	LRRTM3_NRXN3	LRRTM3	NRXN3	Signaling by Leucine-Rich Repeat Transmembrane Neuronal Protein	0	0	0.3449	17.488	AD	sig	Macrophage	Proliferation
CPI-SS026EC3854	LRRTM3_NRXN3	LRRTM3	NRXN3	Signaling by Leucine-Rich Repeat Transmembrane Neuronal Protein	0	0	0.3856	25.876	AD	sig	Monocyte	Homeostasis 1
CPI-SS026EC3854	LRRTM3_NRXN3	LRRTM3	NRXN3	Signaling by Leucine-Rich Repeat Transmembrane Neuronal Protein	0	0	0.3577	23.345	AD	sig	Monocyte	Proliferation
CPI-SS026EC3854	LRRTM3_NRXN3	LRRTM3	NRXN3	Signaling by Leucine-Rich Repeat Transmembrane Neuronal Protein	0	0	0.3995	32.944	AD	sig	Proliferation	Homeostasis 1
CPI-SS026EC3854	LRRTM3_NRXN3	LRRTM3	NRXN3	Signaling by Leucine-Rich Repeat Transmembrane Neuronal Protein	0	0	0.3716	29.722	AD	sig	Proliferation	Proliferation
CPI-SS026EC3854	LRRTM3_NRXN3	LRRTM3	NRXN3	Signaling by Leucine-Rich Repeat Transmembrane Neuronal Protein	0	0	0.3629	14.367	AD	sig	Tau Microglia	Homeostasis 1
CPI-SS026EC3854	LRRTM3_NRXN3	LRRTM3	NRXN3	Signaling by Leucine-Rich Repeat Transmembrane Neuronal Protein	0	0	0.335	12.962	AD	sig	Tau Microglia	Proliferation
CPI-SS0F97A06CD	LRRTM4_NRXN3	LRRTM4	NRXN3	Signaling by Leucine-Rich Repeat Transmembrane Neuronal Protein	0	0	0.4581	13.039	AD	sig	DAM1	Homeostasis 1
CPI-SS0F97A06CD	LRRTM4_NRXN3	LRRTM4	NRXN3	Signaling by Leucine-Rich Repeat Transmembrane Neuronal Protein	0	0	0.4263	11.739	AD	sig	Homeostasis 1	DAM1
CPI-SS0F97A06CD	LRRTM4_NRXN3	LRRTM4	NRXN3	Signaling by Leucine-Rich Repeat Transmembrane Neuronal Protein	0	0	0.6228	37.774	AD	sig	Homeostasis 1	Homeostasis 1
CPI-SS0F97A06CD	LRRTM4_NRXN3	LRRTM4	NRXN3	Signaling by Leucine-Rich Repeat Transmembrane Neuronal Protein	0.0006	0.0068	0.4449	14.203	AD	sig	Homeostasis 1	Homeostasis 2
CPI-SS0F97A06CD	LRRTM4_NRXN3	LRRTM4	NRXN3	Signaling by Leucine-Rich Repeat Transmembrane Neuronal Protein	0	0	0.4986	21.316	AD	sig	Homeostasis 1	MHC 1
CPI-SS0F97A06CD	LRRTM4_NRXN3	LRRTM4	NRXN3	Signaling by Leucine-Rich Repeat Transmembrane Neuronal Protein	0	0	0.4979	21.233	AD	sig	Homeostasis 1	MHC 2
CPI-SS0F97A06CD	LRRTM4_NRXN3	LRRTM4	NRXN3	Signaling by Leucine-Rich Repeat Transmembrane Neuronal Protein	0	0	0.4585	16.006	AD	sig	Homeostasis 1	Macrophage
CPI-SS0F97A06CD	LRRTM4_NRXN3	LRRTM4	NRXN3	Signaling by Leucine-Rich Repeat Transmembrane Neuronal Protein	0	0	0.5156	23.571	AD	sig	Homeostasis 1	Monocyte
CPI-SS0F97A06CD	LRRTM4_NRXN3	LRRTM4	NRXN3	Signaling by Leucine-Rich Repeat Transmembrane Neuronal Protein	0	0	0.5949	34.08	AD	sig	Homeostasis 1	Proliferation
CPI-SS0F97A06CD	LRRTM4_NRXN3	LRRTM4	NRXN3	Signaling by Leucine-Rich Repeat Transmembrane Neuronal Protein	0	0	0.4732	15.309	AD	sig	Homeostasis 2	Homeostasis 1
CPI-SS0F97A06CD	LRRTM4_NRXN3	LRRTM4	NRXN3	Signaling by Leucine-Rich Repeat Transmembrane Neuronal Protein	0	0	0.4458	11.203	AD	sig	T cell	Homeostasis 1
CPI-SS0F97A06CD	LRRTM4_NRXN3	LRRTM4	NRXN3	Signaling by Leucine-Rich Repeat Transmembrane Neuronal Protein	0	0	0.5175	21.974	AD	sig	MHC 1	Homeostasis 1
CPI-SS0F97A06CD	LRRTM4_NRXN3	LRRTM4	NRXN3	Signaling by Leucine-Rich Repeat Transmembrane Neuronal Protein	0	0	0.4897	19.825	AD	sig	MHC 1	Proliferation
CPI-SS0F97A06CD	LRRTM4_NRXN3	LRRTM4	NRXN3	Signaling by Leucine-Rich Repeat Transmembrane Neuronal Protein	0	0	0.5067	20.347	AD	sig	MHC 2	Homeostasis 1
CPI-SS0F97A06CD	LRRTM4_NRXN3	LRRTM4	NRXN3	Signaling by Leucine-Rich Repeat Transmembrane Neuronal Protein	0.0014	0.0153	0.4788	18.357	AD	sig	MHC 2	Proliferation
CPI-SS0F97A06CD	LRRTM4_NRXN3	LRRTM4	NRXN3	Signaling by Leucine-Rich Repeat Transmembrane Neuronal Protein	0	0	0.4937	18.393	AD	sig	Macrophage	Homeostasis 1
CPI-SS0F97A06CD	LRRTM4_NRXN3	LRRTM4	NRXN3	Signaling by Leucine-Rich Repeat Transmembrane Neuronal Protein	0	0	0.4658	16.594	AD	sig	Macrophage	Proliferation
CPI-SS0F97A06CD	LRRTM4_NRXN3	LRRTM4	NRXN3	Signaling by Leucine-Rich Repeat Transmembrane Neuronal Protein	0	0	0.5303	23.89	AD	sig	Monocyte	Homeostasis 1
CPI-SS0F97A06CD	LRRTM4_NRXN3	LRRTM4	NRXN3	Signaling by Leucine-Rich Repeat Transmembrane Neuronal Protein	0	0	0.5024	21.554	AD	sig	Monocyte	Proliferation
CPI-SS0F97A06CD	LRRTM4_NRXN3	LRRTM4	NRXN3	Signaling by Leucine-Rich Repeat Transmembrane Neuronal Protein	0	0	0.5573	27.941	AD	sig	Proliferation	Homeostasis 1
CPI-SS0F97A06CD	LRRTM4_NRXN3	LRRTM4	NRXN3	Signaling by Leucine-Rich Repeat Transmembrane Neuronal Protein	0.0019	0.0204	0.4501	17.435	AD	sig	Proliferation	Monocyte
CPI-SS0F97A06CD	LRRTM4_NRXN3	LRRTM4	NRXN3	Signaling by Leucine-Rich Repeat Transmembrane Neuronal Protein	0	0	0.5294	25.208	AD	sig	Proliferation	Proliferation
CPI-SS0F97A06CD	LRRTM4_NRXN3	LRRTM4	NRXN3	Signaling by Leucine-Rich Repeat Transmembrane Neuronal Protein	0	0	0.4215	7.554	AD	sig	Tau Microglia	Homeostasis 1
CPI-SS0731F750C	NLGN1_NRXN3	NLGN1	NRXN3	Signaling by Neuroligin	0	0	0.4195	11.623	AD	sig	DAM1	Homeostasis 1
CPI-SS0731F750C	NLGN1_NRXN3	NLGN1	NRXN3	Signaling by Neuroligin	0	0	0.3916	10.486	AD	sig	DAM1	Proliferation
CPI-SS0731F750C	NLGN1_NRXN3	NLGN1	NRXN3	Signaling by Neuroligin	0	0	0.5176	33.946	AD	sig	Homeostasis 1	Homeostasis 1
CPI-SS0731F750C	NLGN1_NRXN3	NLGN1	NRXN3	Signaling by Neuroligin	0	0	0.3934	19.156	AD	sig	Homeostasis 1	MHC 1
CPI-SS0731F750C	NLGN1_NRXN3	NLGN1	NRXN3	Signaling by Neuroligin	0	0	0.4104	21.182	AD	sig	Homeostasis 1	Monocyte
CPI-SS0731F750C	NLGN1_NRXN3	NLGN1	NRXN3	Signaling by Neuroligin	0	0	0.4897	30.626	AD	sig	Homeostasis 1	Proliferation
CPI-SS0731F750C	NLGN1_NRXN3	NLGN1	NRXN3	Signaling by Neuroligin	0	0	0.4232	12.469	AD	sig	Homeostasis 2	Homeostasis 1
CPI-SS0731F750C	NLGN1_NRXN3	NLGN1	NRXN3	Signaling by Neuroligin	0.0001	0.0012	0.3954	11.249	AD	sig	Homeostasis 2	Proliferation
CPI-SS0731F750C	NLGN1_NRXN3	NLGN1	NRXN3	Signaling by Neuroligin	0	0	0.3685	0	AD	sig	Inflammation	Homeostasis 1
CPI-SS0731F750C	NLGN1_NRXN3	NLGN1	NRXN3	Signaling by Neuroligin	0	0	0.4106	9.596	AD	sig	T cell	Homeostasis 1
CPI-SS0731F750C	NLGN1_NRXN3	NLGN1	NRXN3	Signaling by Neuroligin	0.0001	0.0012	0.3827	8.658	AD	sig	T cell	Proliferation
CPI-SS0731F750C	NLGN1_NRXN3	NLGN1	NRXN3	Signaling by Neuroligin	0	0	0.4494	18.414	AD	sig	MHC 1	Homeostasis 1
CPI-SS0731F750C	NLGN1_NRXN3	NLGN1	NRXN3	Signaling by Neuroligin	0	0	0.4215	16.613	AD	sig	MHC 1	Proliferation
CPI-SS0731F750C	NLGN1_NRXN3	NLGN1	NRXN3	Signaling by Neuroligin	0	0	0.423	12.41	AD	sig	MHC 2	Homeostasis 1
CPI-SS0731F750C	NLGN1_NRXN3	NLGN1	NRXN3	Signaling by Neuroligin	0	0	0.4431	16.998	AD	sig	Macrophage	Homeostasis 1
CPI-SS0731F750C	NLGN1_NRXN3	NLGN1	NRXN3	Signaling by Neuroligin	0	0	0.4153	15.335	AD	sig	Macrophage	Proliferation
CPI-SS0731F750C	NLGN1_NRXN3	NLGN1	NRXN3	Signaling by Neuroligin	0	0	0.4715	23.443	AD	sig	Monocyte	Homeostasis 1
CPI-SS0731F750C	NLGN1_NRXN3	NLGN1	NRXN3	Signaling by Neuroligin	0	0	0.4436	21.15	AD	sig	Monocyte	Proliferation
CPI-SS0731F750C	NLGN1_NRXN3	NLGN1	NRXN3	Signaling by Neuroligin	0	0	0.4896	27.579	AD	sig	Proliferation	Homeostasis 1
CPI-SS0731F750C	NLGN1_NRXN3	NLGN1	NRXN3	Signaling by Neuroligin	0.0018	0.0194	0.3824	17.209	AD	sig	Proliferation	Monocyte
CPI-SS0731F750C	NLGN1_NRXN3	NLGN1	NRXN3	Signaling by Neuroligin	0	0	0.4617	24.881	AD	sig	Proliferation	Proliferation
CPI-SS0731F750C	NLGN1_NRXN3	NLGN1	NRXN3	Signaling by Neuroligin	0	0	0.3969	6.471	AD	sig	Tau Microglia	Homeostasis 1
CPI-SS0C12FCB93	NLGN2_NRXN3	NLGN2	NRXN3	Signaling by Neuroligin	0	0	0.3451	17.139	AD	sig	DAM1	Homeostasis 1
CPI-SS0C12FCB93	NLGN2_NRXN3	NLGN2	NRXN3	Signaling by Neuroligin	0	0	0.3172	15.462	AD	sig	DAM1	Proliferation
CPI-SS0C12FCB93	NLGN2_NRXN3	NLGN2	NRXN3	Signaling by Neuroligin	0	0	0.3559	34.798	AD	sig	Homeostasis 1	Homeostasis 1
CPI-SS0C12FCB93	NLGN2_NRXN3	NLGN2	NRXN3	Signaling by Neuroligin	0	0	0.328	31.394	AD	sig	Homeostasis 1	Proliferation
CPI-SS0C12FCB93	NLGN2_NRXN3	NLGN2	NRXN3	Signaling by Neuroligin	0	0	0.346	18.571	AD	sig	Inflammation	Homeostasis 1
CPI-SS0C12FCB93	NLGN2_NRXN3	NLGN2	NRXN3	Signaling by Neuroligin	0	0	0.3181	16.754	AD	sig	Inflammation	Proliferation
CPI-SS0C12FCB93	NLGN2_NRXN3	NLGN2	NRXN3	Signaling by Neuroligin	0	0	0.3441	15.499	AD	sig	T cell	Homeostasis 1
CPI-SS0C12FCB93	NLGN2_NRXN3	NLGN2	NRXN3	Signaling by Neuroligin	0	0	0.3162	13.983	AD	sig	T cell	Proliferation
CPI-SS0C12FCB93	NLGN2_NRXN3	NLGN2	NRXN3	Signaling by Neuroligin	0	0	0.3508	26.453	AD	sig	MHC 1	Homeostasis 1
CPI-SS0C12FCB93	NLGN2_NRXN3	NLGN2	NRXN3	Signaling by Neuroligin	0	0	0.3229	23.866	AD	sig	MHC 1	Proliferation
CPI-SS0C12FCB93	NLGN2_NRXN3	NLGN2	NRXN3	Signaling by Neuroligin	0	0	0.3436	14.726	AD	sig	MHC 2	Homeostasis 1
CPI-SS0C12FCB93	NLGN2_NRXN3	NLGN2	NRXN3	Signaling by Neuroligin	0	0	0.3157	13.286	AD	sig	MHC 2	Proliferation
CPI-SS0C12FCB93	NLGN2_NRXN3	NLGN2	NRXN3	Signaling by Neuroligin	0	0	0.3466	19.607	AD	sig	Macrophage	Homeostasis 1
CPI-SS0C12FCB93	NLGN2_NRXN3	NLGN2	NRXN3	Signaling by Neuroligin	0	0	0.3187	17.689	AD	sig	Macrophage	Proliferation
CPI-SS0C12FCB93	NLGN2_NRXN3	NLGN2	NRXN3	Signaling by Neuroligin	0	0	0.344	15.366	AD	sig	Monocyte	Homeostasis 1
CPI-SS0C12FCB93	NLGN2_NRXN3	NLGN2	NRXN3	Signaling by Neuroligin	0	0	0.3161	13.863	AD	sig	Monocyte	Proliferation
CPI-SS0C12FCB93	NLGN2_NRXN3	NLGN2	NRXN3	Signaling by Neuroligin	0	0	0.3559	34.726	AD	sig	Proliferation	Homeostasis 1
CPI-SS0C12FCB93	NLGN2_NRXN3	NLGN2	NRXN3	Signaling by Neuroligin	0	0	0.328	31.33	AD	sig	Proliferation	Proliferation
CPI-SS0C12FCB93	NLGN2_NRXN3	NLGN2	NRXN3	Signaling by Neuroligin	0	0	0.3433	14.288	AD	sig	Tau Microglia	Homeostasis 1
CPI-SS0C12FCB93	NLGN2_NRXN3	NLGN2	NRXN3	Signaling by Neuroligin	0	0	0.3155	12.89	AD	sig	Tau Microglia	Proliferation
CPI-SS07FBAAD8D	NLGN3_NRXN3	NLGN3	NRXN3	Signaling by Neuroligin	0	0	0.3479	22.357	AD	sig	DAM1	Homeostasis 1
CPI-SS07FBAAD8D	NLGN3_NRXN3	NLGN3	NRXN3	Signaling by Neuroligin	0	0	0.32	20.17	AD	sig	DAM1	Proliferation
CPI-SS07FBAAD8D	NLGN3_NRXN3	NLGN3	NRXN3	Signaling by Neuroligin	0	0	0.3563	36.373	AD	sig	Homeostasis 1	Homeostasis 1
CPI-SS07FBAAD8D	NLGN3_NRXN3	NLGN3	NRXN3	Signaling by Neuroligin	0	0	0.3284	32.815	AD	sig	Homeostasis 1	Proliferation
CPI-SS07FBAAD8D	NLGN3_NRXN3	NLGN3	NRXN3	Signaling by Neuroligin	0	0	0.3579	39.076	AD	sig	Homeostasis 2	Homeostasis 1
CPI-SS07FBAAD8D	NLGN3_NRXN3	NLGN3	NRXN3	Signaling by Neuroligin	0	0	0.33	35.254	AD	sig	Homeostasis 2	Proliferation
CPI-SS07FBAAD8D	NLGN3_NRXN3	NLGN3	NRXN3	Signaling by Neuroligin	0	0	0.3438	15.515	AD	sig	Inflammation	Homeostasis 1
CPI-SS07FBAAD8D	NLGN3_NRXN3	NLGN3	NRXN3	Signaling by Neuroligin	0	0	0.3159	13.998	AD	sig	Inflammation	Proliferation
CPI-SS07FBAAD8D	NLGN3_NRXN3	NLGN3	NRXN3	Signaling by Neuroligin	0	0	0.3451	17.649	AD	sig	T cell	Homeostasis 1
CPI-SS07FBAAD8D	NLGN3_NRXN3	NLGN3	NRXN3	Signaling by Neuroligin	0	0	0.3172	15.923	AD	sig	T cell	Proliferation
CPI-SS07FBAAD8D	NLGN3_NRXN3	NLGN3	NRXN3	Signaling by Neuroligin	0	0	0.349	24.201	AD	sig	MHC 1	Homeostasis 1
CPI-SS07FBAAD8D	NLGN3_NRXN3	NLGN3	NRXN3	Signaling by Neuroligin	0	0	0.3211	21.834	AD	sig	MHC 1	Proliferation
CPI-SS07FBAAD8D	NLGN3_NRXN3	NLGN3	NRXN3	Signaling by Neuroligin	0	0	0.3481	22.63	AD	sig	MHC 2	Homeostasis 1
CPI-SS07FBAAD8D	NLGN3_NRXN3	NLGN3	NRXN3	Signaling by Neuroligin	0	0	0.3202	20.416	AD	sig	MHC 2	Proliferation
CPI-SS07FBAAD8D	NLGN3_NRXN3	NLGN3	NRXN3	Signaling by Neuroligin	0	0	0.3448	17.102	AD	sig	Macrophage	Homeostasis 1
CPI-SS07FBAAD8D	NLGN3_NRXN3	NLGN3	NRXN3	Signaling by Neuroligin	0	0	0.3169	15.429	AD	sig	Macrophage	Proliferation
CPI-SS07FBAAD8D	NLGN3_NRXN3	NLGN3	NRXN3	Signaling by Neuroligin	0	0	0.3494	24.942	AD	sig	Monocyte	Homeostasis 1
CPI-SS07FBAAD8D	NLGN3_NRXN3	NLGN3	NRXN3	Signaling by Neuroligin	0	0	0.3216	22.502	AD	sig	Monocyte	Proliferation
CPI-SS07FBAAD8D	NLGN3_NRXN3	NLGN3	NRXN3	Signaling by Neuroligin	0	0	0.3493	24.692	AD	sig	Proliferation	Homeostasis 1
CPI-SS07FBAAD8D	NLGN3_NRXN3	NLGN3	NRXN3	Signaling by Neuroligin	0	0	0.3214	22.277	AD	sig	Proliferation	Proliferation
CPI-SS07FBAAD8D	NLGN3_NRXN3	NLGN3	NRXN3	Signaling by Neuroligin	0	0	0.3456	18.563	AD	sig	Tau Microglia	Homeostasis 1
CPI-SS07FBAAD8D	NLGN3_NRXN3	NLGN3	NRXN3	Signaling by Neuroligin	0	0	0.3178	16.747	AD	sig	Tau Microglia	Proliferation
CPI-SS0F9118AB4	NLGN4X_NRXN3	NLGN4X	NRXN3	Signaling by Neuroligin	0	0	0.3555	11.714	AD	sig	DAM1	Homeostasis 1
CPI-SS0F9118AB4	NLGN4X_NRXN3	NLGN4X	NRXN3	Signaling by Neuroligin	0	0	0.3276	10.568	AD	sig	DAM1	Proliferation
CPI-SS0F9118AB4	NLGN4X_NRXN3	NLGN4X	NRXN3	Signaling by Neuroligin	0	0	0.3725	21.217	AD	sig	Homeostasis 1	Homeostasis 1
CPI-SS0F9118AB4	NLGN4X_NRXN3	NLGN4X	NRXN3	Signaling by Neuroligin	0	0	0.3446	19.142	AD	sig	Homeostasis 1	Proliferation
CPI-SS0F9118AB4	NLGN4X_NRXN3	NLGN4X	NRXN3	Signaling by Neuroligin	0	0	0.3519	9.724	AD	sig	Homeostasis 2	Homeostasis 1
CPI-SS0F9118AB4	NLGN4X_NRXN3	NLGN4X	NRXN3	Signaling by Neuroligin	0	0	0.3241	8.773	AD	sig	Homeostasis 2	Proliferation
CPI-SS0F9118AB4	NLGN4X_NRXN3	NLGN4X	NRXN3	Signaling by Neuroligin	0	0	0.3526	10.069	AD	sig	Inflammation	Homeostasis 1
CPI-SS0F9118AB4	NLGN4X_NRXN3	NLGN4X	NRXN3	Signaling by Neuroligin	0	0	0.3247	9.084	AD	sig	Inflammation	Proliferation
CPI-SS0F9118AB4	NLGN4X_NRXN3	NLGN4X	NRXN3	Signaling by Neuroligin	0	0	0.3579	13.04	AD	sig	T cell	Homeostasis 1
CPI-SS0F9118AB4	NLGN4X_NRXN3	NLGN4X	NRXN3	Signaling by Neuroligin	0	0	0.33	11.765	AD	sig	T cell	Proliferation
CPI-SS0F9118AB4	NLGN4X_NRXN3	NLGN4X	NRXN3	Signaling by Neuroligin	0	0	0.3581	13.148	AD	sig	MHC 1	Homeostasis 1
CPI-SS0F9118AB4	NLGN4X_NRXN3	NLGN4X	NRXN3	Signaling by Neuroligin	0	0	0.3302	11.862	AD	sig	MHC 1	Proliferation
CPI-SS0F9118AB4	NLGN4X_NRXN3	NLGN4X	NRXN3	Signaling by Neuroligin	0	0	0.3493	8.27	AD	sig	MHC 2	Homeostasis 1
CPI-SS0F9118AB4	NLGN4X_NRXN3	NLGN4X	NRXN3	Signaling by Neuroligin	0	0	0.3215	7.461	AD	sig	MHC 2	Proliferation
CPI-SS0F9118AB4	NLGN4X_NRXN3	NLGN4X	NRXN3	Signaling by Neuroligin	0	0	0.3586	13.426	AD	sig	Macrophage	Homeostasis 1
CPI-SS0F9118AB4	NLGN4X_NRXN3	NLGN4X	NRXN3	Signaling by Neuroligin	0	0	0.3307	12.113	AD	sig	Macrophage	Proliferation
CPI-SS0F9118AB4	NLGN4X_NRXN3	NLGN4X	NRXN3	Signaling by Neuroligin	0	0	0.3612	14.915	AD	sig	Monocyte	Homeostasis 1
CPI-SS0F9118AB4	NLGN4X_NRXN3	NLGN4X	NRXN3	Signaling by Neuroligin	0	0	0.3333	13.456	AD	sig	Monocyte	Proliferation
CPI-SS0F9118AB4	NLGN4X_NRXN3	NLGN4X	NRXN3	Signaling by Neuroligin	0	0	0.3601	14.299	AD	sig	Proliferation	Homeostasis 1
CPI-SS0F9118AB4	NLGN4X_NRXN3	NLGN4X	NRXN3	Signaling by Neuroligin	0	0	0.3322	12.9	AD	sig	Proliferation	Proliferation
CPI-SS0F9118AB4	NLGN4X_NRXN3	NLGN4X	NRXN3	Signaling by Neuroligin	0	0	0.3513	9.385	AD	sig	Tau Microglia	Homeostasis 1
CPI-SS0F9118AB4	NLGN4X_NRXN3	NLGN4X	NRXN3	Signaling by Neuroligin	0	0	0.3235	8.467	AD	sig	Tau Microglia	Proliferation
CPI-SS0837C7966	NLGN4Y_NRXN3	NLGN4Y	NRXN3		0	0	0.394	10.642	AD	sig	DAM1	Homeostasis 1
CPI-SS0837C7966	NLGN4Y_NRXN3	NLGN4Y	NRXN3		0	0	0.3662	9.601	AD	sig	DAM1	Proliferation
CPI-SS0837C7966	NLGN4Y_NRXN3	NLGN4Y	NRXN3		0	0	0.4317	17.37	AD	sig	Homeostasis 1	Homeostasis 1
CPI-SS0837C7966	NLGN4Y_NRXN3	NLGN4Y	NRXN3		0	0	0.4038	15.671	AD	sig	Homeostasis 1	Proliferation
CPI-SS0837C7966	NLGN4Y_NRXN3	NLGN4Y	NRXN3		0	0	0.5171	32.653	AD	sig	Homeostasis 2	Homeostasis 1
CPI-SS0837C7966	NLGN4Y_NRXN3	NLGN4Y	NRXN3		0	0	0.3929	18.426	AD	sig	Homeostasis 2	MHC 1
CPI-SS0837C7966	NLGN4Y_NRXN3	NLGN4Y	NRXN3		0.0001	0.0012	0.3923	18.354	AD	sig	Homeostasis 2	MHC 2
CPI-SS0837C7966	NLGN4Y_NRXN3	NLGN4Y	NRXN3		0	0	0.3528	13.836	AD	sig	Homeostasis 2	Macrophage
CPI-SS0837C7966	NLGN4Y_NRXN3	NLGN4Y	NRXN3		0	0	0.4099	20.375	AD	sig	Homeostasis 2	Monocyte
CPI-SS0837C7966	NLGN4Y_NRXN3	NLGN4Y	NRXN3		0	0	0.4892	29.459	AD	sig	Homeostasis 2	Proliferation
CPI-SS0837C7966	NLGN4Y_NRXN3	NLGN4Y	NRXN3		0	0	0.4793	18.968	AD	sig	Inflammation	DAM1
CPI-SS0837C7966	NLGN4Y_NRXN3	NLGN4Y	NRXN3		0	0	0.6757	61.035	AD	sig	Inflammation	Homeostasis 1
CPI-SS0837C7966	NLGN4Y_NRXN3	NLGN4Y	NRXN3		0	0	0.4978	22.949	AD	sig	Inflammation	Homeostasis 2
CPI-SS0837C7966	NLGN4Y_NRXN3	NLGN4Y	NRXN3		0	0	0.3907	0	AD	sig	Inflammation	Inflammation
CPI-SS0837C7966	NLGN4Y_NRXN3	NLGN4Y	NRXN3		0	0	0.4594	14.722	AD	sig	Inflammation	T cell
CPI-SS0837C7966	NLGN4Y_NRXN3	NLGN4Y	NRXN3		0	0	0.5515	34.442	AD	sig	Inflammation	MHC 1
CPI-SS0837C7966	NLGN4Y_NRXN3	NLGN4Y	NRXN3		0	0	0.5509	34.307	AD	sig	Inflammation	MHC 2
CPI-SS0837C7966	NLGN4Y_NRXN3	NLGN4Y	NRXN3		0	0	0.5114	25.862	AD	sig	Inflammation	Macrophage
CPI-SS0837C7966	NLGN4Y_NRXN3	NLGN4Y	NRXN3		0	0	0.5685	38.085	AD	sig	Inflammation	Monocyte
CPI-SS0837C7966	NLGN4Y_NRXN3	NLGN4Y	NRXN3		0	0	0.6478	55.065	AD	sig	Inflammation	Proliferation
CPI-SS0837C7966	NLGN4Y_NRXN3	NLGN4Y	NRXN3		0	0	0.4265	7.683	AD	sig	Inflammation	Tau Microglia
CPI-SS0837C7966	NLGN4Y_NRXN3	NLGN4Y	NRXN3		0	0	0.3681	5.993	AD	sig	T cell	Homeostasis 1
CPI-SS0837C7966	NLGN4Y_NRXN3	NLGN4Y	NRXN3		0.0005	0.0057	0.3402	5.407	AD	sig	T cell	Proliferation
CPI-SS0837C7966	NLGN4Y_NRXN3	NLGN4Y	NRXN3		0	0	0.422	15.639	AD	sig	MHC 1	Homeostasis 1
CPI-SS0837C7966	NLGN4Y_NRXN3	NLGN4Y	NRXN3		0	0	0.3941	14.109	AD	sig	MHC 1	Proliferation
CPI-SS0837C7966	NLGN4Y_NRXN3	NLGN4Y	NRXN3		0	0	0.4594	22.332	AD	sig	MHC 2	Homeostasis 1
CPI-SS0837C7966	NLGN4Y_NRXN3	NLGN4Y	NRXN3		0	0	0.4315	20.148	AD	sig	MHC 2	Proliferation
CPI-SS0837C7966	NLGN4Y_NRXN3	NLGN4Y	NRXN3		0	0	0.3624	4.975	AD	sig	Macrophage	Homeostasis 1
CPI-SS0837C7966	NLGN4Y_NRXN3	NLGN4Y	NRXN3		0.0048	0.0488	0.3345	4.488	AD	sig	Macrophage	Proliferation
CPI-SS0837C7966	NLGN4Y_NRXN3	NLGN4Y	NRXN3		0	0	0.3522	3.151	AD	sig	Monocyte	Homeostasis 1
CPI-SS0837C7966	NLGN4Y_NRXN3	NLGN4Y	NRXN3		0	0	0.3563	12.134	AD	sig	Proliferation	DAM1
CPI-SS0837C7966	NLGN4Y_NRXN3	NLGN4Y	NRXN3		0	0	0.5528	39.046	AD	sig	Proliferation	Homeostasis 1
CPI-SS0837C7966	NLGN4Y_NRXN3	NLGN4Y	NRXN3		0	0	0.3749	14.681	AD	sig	Proliferation	Homeostasis 2
CPI-SS0837C7966	NLGN4Y_NRXN3	NLGN4Y	NRXN3		0.0004	0.0046	0.3365	9.418	AD	sig	Proliferation	T cell
CPI-SS0837C7966	NLGN4Y_NRXN3	NLGN4Y	NRXN3		0	0	0.4286	22.034	AD	sig	Proliferation	MHC 1
CPI-SS0837C7966	NLGN4Y_NRXN3	NLGN4Y	NRXN3		0	0	0.428	21.947	AD	sig	Proliferation	MHC 2
CPI-SS0837C7966	NLGN4Y_NRXN3	NLGN4Y	NRXN3		0	0	0.3885	16.545	AD	sig	Proliferation	Macrophage
CPI-SS0837C7966	NLGN4Y_NRXN3	NLGN4Y	NRXN3		0	0	0.4456	24.364	AD	sig	Proliferation	Monocyte
CPI-SS0837C7966	NLGN4Y_NRXN3	NLGN4Y	NRXN3		0	0	0.5249	35.227	AD	sig	Proliferation	Proliferation
CPI-SS0837C7966	NLGN4Y_NRXN3	NLGN4Y	NRXN3		0	0	0.422	15.639	AD	sig	Tau Microglia	Homeostasis 1
CPI-SS0837C7966	NLGN4Y_NRXN3	NLGN4Y	NRXN3		0	0	0.3941	14.11	AD	sig	Tau Microglia	Proliferation
CPI-SC0C09120F1	ICAM1_integrin_aMb2_complex	ICAM1		Adhesion by ICAM	0	0	0.2814	9.874	AD	sig	DAM1	Homeostasis 1
CPI-SC0C09120F1	ICAM1_integrin_aMb2_complex	ICAM1		Adhesion by ICAM	0	0	0.3456	10.995	AD	sig	DAM1	MHC 2
CPI-SC0C09120F1	ICAM1_integrin_aMb2_complex	ICAM1		Adhesion by ICAM	0.0013	0.0142	0.2765	9.672	AD	sig	DAM1	Monocyte
CPI-SC0C09120F1	ICAM1_integrin_aMb2_complex	ICAM1		Adhesion by ICAM	0	0	0.2557	11.595	AD	sig	Homeostasis 1	DAM1
CPI-SC0C09120F1	ICAM1_integrin_aMb2_complex	ICAM1		Adhesion by ICAM	0	0	0.2891	14.502	AD	sig	Homeostasis 1	Homeostasis 1
CPI-SC0C09120F1	ICAM1_integrin_aMb2_complex	ICAM1		Adhesion by ICAM	0	0	0.3533	16.147	AD	sig	Homeostasis 1	MHC 2
CPI-SC0C09120F1	ICAM1_integrin_aMb2_complex	ICAM1		Adhesion by ICAM	0	0	0.2842	14.204	AD	sig	Homeostasis 1	Monocyte
CPI-SC0C09120F1	ICAM1_integrin_aMb2_complex	ICAM1		Adhesion by ICAM	0	0	0.2912	15.741	AD	sig	Homeostasis 2	Homeostasis 1
CPI-SC0C09120F1	ICAM1_integrin_aMb2_complex	ICAM1		Adhesion by ICAM	0	0	0.3553	17.528	AD	sig	Homeostasis 2	MHC 2
CPI-SC0C09120F1	ICAM1_integrin_aMb2_complex	ICAM1		Adhesion by ICAM	0.0001	0.0012	0.2862	15.419	AD	sig	Homeostasis 2	Monocyte
CPI-SC0C09120F1	ICAM1_integrin_aMb2_complex	ICAM1		Adhesion by ICAM	0	0	0.3291	46.945	AD	sig	Inflammation	DAM1
CPI-SC0C09120F1	ICAM1_integrin_aMb2_complex	ICAM1		Adhesion by ICAM	0	0	0.3626	58.711	AD	sig	Inflammation	Homeostasis 1
CPI-SC0C09120F1	ICAM1_integrin_aMb2_complex	ICAM1		Adhesion by ICAM	0	0	0.345	58.45	AD	sig	Inflammation	Homeostasis 2
CPI-SC0C09120F1	ICAM1_integrin_aMb2_complex	ICAM1		Adhesion by ICAM	0	0	0.3022	37.571	AD	sig	Inflammation	Inflammation
CPI-SC0C09120F1	ICAM1_integrin_aMb2_complex	ICAM1		Adhesion by ICAM	0	0	0.3068	42.522	AD	sig	Inflammation	MHC 1
CPI-SC0C09120F1	ICAM1_integrin_aMb2_complex	ICAM1		Adhesion by ICAM	0	0	0.4268	65.373	AD	sig	Inflammation	MHC 2
CPI-SC0C09120F1	ICAM1_integrin_aMb2_complex	ICAM1		Adhesion by ICAM	0	0	0.3576	57.507	AD	sig	Inflammation	Monocyte
CPI-SC0C09120F1	ICAM1_integrin_aMb2_complex	ICAM1		Adhesion by ICAM	0	0	0.3426	54.637	AD	sig	Inflammation	Proliferation
CPI-SC0C09120F1	ICAM1_integrin_aMb2_complex	ICAM1		Adhesion by ICAM	0	0	0.2853	47.789	AD	sig	Inflammation	Tau Microglia
CPI-SC0C09120F1	ICAM1_integrin_aMb2_complex	ICAM1		Adhesion by ICAM	0	0	0.265	0	AD	sig	T cell	Homeostasis 1
CPI-SC0C09120F1	ICAM1_integrin_aMb2_complex	ICAM1		Adhesion by ICAM	0	0	0.3292	0	AD	sig	T cell	MHC 2
CPI-SC0C09120F1	ICAM1_integrin_aMb2_complex	ICAM1		Adhesion by ICAM	0	0	0.2566	12.038	AD	sig	MHC 1	DAM1
CPI-SC0C09120F1	ICAM1_integrin_aMb2_complex	ICAM1		Adhesion by ICAM	0	0	0.29	15.056	AD	sig	MHC 1	Homeostasis 1
CPI-SC0C09120F1	ICAM1_integrin_aMb2_complex	ICAM1		Adhesion by ICAM	0.0044	0.045	0.2725	14.989	AD	sig	MHC 1	Homeostasis 2
CPI-SC0C09120F1	ICAM1_integrin_aMb2_complex	ICAM1		Adhesion by ICAM	0	0	0.3542	16.764	AD	sig	MHC 1	MHC 2
CPI-SC0C09120F1	ICAM1_integrin_aMb2_complex	ICAM1		Adhesion by ICAM	0	0	0.2851	14.747	AD	sig	MHC 1	Monocyte
CPI-SC0C09120F1	ICAM1_integrin_aMb2_complex	ICAM1		Adhesion by ICAM	0	0	0.3046	23.81	AD	sig	MHC 2	Homeostasis 1
CPI-SC0C09120F1	ICAM1_integrin_aMb2_complex	ICAM1		Adhesion by ICAM	0.0024	0.0254	0.287	23.705	AD	sig	MHC 2	Homeostasis 2
CPI-SC0C09120F1	ICAM1_integrin_aMb2_complex	ICAM1		Adhesion by ICAM	0	0	0.3688	26.512	AD	sig	MHC 2	MHC 2
CPI-SC0C09120F1	ICAM1_integrin_aMb2_complex	ICAM1		Adhesion by ICAM	0	0	0.2996	23.322	AD	sig	MHC 2	Monocyte
CPI-SC0C09120F1	ICAM1_integrin_aMb2_complex	ICAM1		Adhesion by ICAM	0.0045	0.0459	0.2846	22.158	AD	sig	MHC 2	Proliferation
CPI-SC0C09120F1	ICAM1_integrin_aMb2_complex	ICAM1		Adhesion by ICAM	0	0	0.2637	15.483	AD	sig	Macrophage	DAM1
CPI-SC0C09120F1	ICAM1_integrin_aMb2_complex	ICAM1		Adhesion by ICAM	0	0	0.2972	19.363	AD	sig	Macrophage	Homeostasis 1
CPI-SC0C09120F1	ICAM1_integrin_aMb2_complex	ICAM1		Adhesion by ICAM	0.0004	0.0046	0.2796	19.277	AD	sig	Macrophage	Homeostasis 2
CPI-SC0C09120F1	ICAM1_integrin_aMb2_complex	ICAM1		Adhesion by ICAM	0	0	0.3614	21.56	AD	sig	Macrophage	MHC 2
CPI-SC0C09120F1	ICAM1_integrin_aMb2_complex	ICAM1		Adhesion by ICAM	0	0	0.2923	18.966	AD	sig	Macrophage	Monocyte
CPI-SC0C09120F1	ICAM1_integrin_aMb2_complex	ICAM1		Adhesion by ICAM	0.0018	0.0194	0.2772	18.02	AD	sig	Macrophage	Proliferation
CPI-SC0C09120F1	ICAM1_integrin_aMb2_complex	ICAM1		Adhesion by ICAM	0	0	0.2842	25.332	AD	sig	Monocyte	DAM1
CPI-SC0C09120F1	ICAM1_integrin_aMb2_complex	ICAM1		Adhesion by ICAM	0	0	0.3177	31.681	AD	sig	Monocyte	Homeostasis 1
CPI-SC0C09120F1	ICAM1_integrin_aMb2_complex	ICAM1		Adhesion by ICAM	0	0	0.3001	31.54	AD	sig	Monocyte	Homeostasis 2
CPI-SC0C09120F1	ICAM1_integrin_aMb2_complex	ICAM1		Adhesion by ICAM	0	0	0.3818	35.276	AD	sig	Monocyte	MHC 2
CPI-SC0C09120F1	ICAM1_integrin_aMb2_complex	ICAM1		Adhesion by ICAM	0	0	0.3127	31.031	AD	sig	Monocyte	Monocyte
CPI-SC0C09120F1	ICAM1_integrin_aMb2_complex	ICAM1		Adhesion by ICAM	0	0	0.2977	29.482	AD	sig	Monocyte	Proliferation
CPI-SC0C09120F1	ICAM1_integrin_aMb2_complex	ICAM1		Adhesion by ICAM	0	0	0.2834	11.071	AD	sig	Proliferation	Homeostasis 1
CPI-SC0C09120F1	ICAM1_integrin_aMb2_complex	ICAM1		Adhesion by ICAM	0	0	0.3476	12.327	AD	sig	Proliferation	MHC 2
CPI-SC0C09120F1	ICAM1_integrin_aMb2_complex	ICAM1		Adhesion by ICAM	0.0017	0.0184	0.2785	10.844	AD	sig	Proliferation	Monocyte
CPI-SC0C09120F1	ICAM1_integrin_aMb2_complex	ICAM1		Adhesion by ICAM	0	0	0.2707	3.407	AD	sig	Tau Microglia	Homeostasis 1
CPI-SC0C09120F1	ICAM1_integrin_aMb2_complex	ICAM1		Adhesion by ICAM	0	0	0.3348	3.793	AD	sig	Tau Microglia	MHC 2
CPI-SC071B77A18	JAM3_integrin_aMb2_complex	JAM3		Adhesion by JAM	0	0	0.277	1.729	AD	sig	DAM1	Homeostasis 1
CPI-SC071B77A18	JAM3_integrin_aMb2_complex	JAM3		Adhesion by JAM	0	0	0.3412	1.925	AD	sig	DAM1	MHC 2
CPI-SC071B77A18	JAM3_integrin_aMb2_complex	JAM3		Adhesion by JAM	0	0	0.2642	9.596	AD	sig	Homeostasis 1	DAM1
CPI-SC071B77A18	JAM3_integrin_aMb2_complex	JAM3		Adhesion by JAM	0	0	0.2977	12.002	AD	sig	Homeostasis 1	Homeostasis 1
CPI-SC071B77A18	JAM3_integrin_aMb2_complex	JAM3		Adhesion by JAM	0.0014	0.0153	0.2802	11.948	AD	sig	Homeostasis 1	Homeostasis 2
CPI-SC071B77A18	JAM3_integrin_aMb2_complex	JAM3		Adhesion by JAM	0	0	0.3619	13.363	AD	sig	Homeostasis 1	MHC 2
CPI-SC071B77A18	JAM3_integrin_aMb2_complex	JAM3		Adhesion by JAM	0	0	0.2928	11.755	AD	sig	Homeostasis 1	Monocyte
CPI-SC071B77A18	JAM3_integrin_aMb2_complex	JAM3		Adhesion by JAM	0.004	0.0411	0.2777	11.169	AD	sig	Homeostasis 1	Proliferation
CPI-SC071B77A18	JAM3_integrin_aMb2_complex	JAM3		Adhesion by JAM	0.0038	0.0391	0.2657	10.178	AD	sig	Homeostasis 2	DAM1
CPI-SC071B77A18	JAM3_integrin_aMb2_complex	JAM3		Adhesion by JAM	0	0	0.2992	12.729	AD	sig	Homeostasis 2	Homeostasis 1
CPI-SC071B77A18	JAM3_integrin_aMb2_complex	JAM3		Adhesion by JAM	0.0026	0.0274	0.2816	12.673	AD	sig	Homeostasis 2	Homeostasis 2
CPI-SC071B77A18	JAM3_integrin_aMb2_complex	JAM3		Adhesion by JAM	0	0	0.3633	14.173	AD	sig	Homeostasis 2	MHC 2
CPI-SC071B77A18	JAM3_integrin_aMb2_complex	JAM3		Adhesion by JAM	0.0001	0.0012	0.2942	12.468	AD	sig	Homeostasis 2	Monocyte
CPI-SC071B77A18	JAM3_integrin_aMb2_complex	JAM3		Adhesion by JAM	0.0048	0.0488	0.2792	11.846	AD	sig	Homeostasis 2	Proliferation
CPI-SC071B77A18	JAM3_integrin_aMb2_complex	JAM3		Adhesion by JAM	0	0	0.2796	3.028	AD	sig	Inflammation	Homeostasis 1
CPI-SC071B77A18	JAM3_integrin_aMb2_complex	JAM3		Adhesion by JAM	0	0	0.3438	3.371	AD	sig	Inflammation	MHC 2
CPI-SC071B77A18	JAM3_integrin_aMb2_complex	JAM3		Adhesion by JAM	0	0	0.2787	2.585	AD	sig	T cell	Homeostasis 1
CPI-SC071B77A18	JAM3_integrin_aMb2_complex	JAM3		Adhesion by JAM	0	0	0.3429	2.879	AD	sig	T cell	MHC 2
CPI-SC071B77A18	JAM3_integrin_aMb2_complex	JAM3		Adhesion by JAM	0	0	0.2786	2.505	AD	sig	MHC 1	Homeostasis 1
CPI-SC071B77A18	JAM3_integrin_aMb2_complex	JAM3		Adhesion by JAM	0	0	0.3427	2.79	AD	sig	MHC 1	MHC 2
CPI-SC071B77A18	JAM3_integrin_aMb2_complex	JAM3		Adhesion by JAM	0	0	0.3392	0.831	AD	sig	MHC 2	MHC 2
CPI-SC071B77A18	JAM3_integrin_aMb2_complex	JAM3		Adhesion by JAM	0	0	0.2735	0	AD	sig	Macrophage	Homeostasis 1
CPI-SC071B77A18	JAM3_integrin_aMb2_complex	JAM3		Adhesion by JAM	0	0	0.3377	0	AD	sig	Macrophage	MHC 2
CPI-SC071B77A18	JAM3_integrin_aMb2_complex	JAM3		Adhesion by JAM	0	0	0.2773	1.88	AD	sig	Monocyte	Homeostasis 1
CPI-SC071B77A18	JAM3_integrin_aMb2_complex	JAM3		Adhesion by JAM	0	0	0.3415	2.093	AD	sig	Monocyte	MHC 2
CPI-SC071B77A18	JAM3_integrin_aMb2_complex	JAM3		Adhesion by JAM	0.002	0.0214	0.2671	10.725	AD	sig	Proliferation	DAM1
CPI-SC071B77A18	JAM3_integrin_aMb2_complex	JAM3		Adhesion by JAM	0	0	0.3005	13.413	AD	sig	Proliferation	Homeostasis 1
CPI-SC071B77A18	JAM3_integrin_aMb2_complex	JAM3		Adhesion by JAM	0.0011	0.0121	0.283	13.354	AD	sig	Proliferation	Homeostasis 2
CPI-SC071B77A18	JAM3_integrin_aMb2_complex	JAM3		Adhesion by JAM	0	0	0.3647	14.935	AD	sig	Proliferation	MHC 2
CPI-SC071B77A18	JAM3_integrin_aMb2_complex	JAM3		Adhesion by JAM	0	0	0.2956	13.138	AD	sig	Proliferation	Monocyte
CPI-SC071B77A18	JAM3_integrin_aMb2_complex	JAM3		Adhesion by JAM	0.0034	0.0352	0.2806	12.483	AD	sig	Proliferation	Proliferation
CPI-SC071B77A18	JAM3_integrin_aMb2_complex	JAM3		Adhesion by JAM	0	0	0.2885	7.456	AD	sig	Tau Microglia	Homeostasis 1
CPI-SC071B77A18	JAM3_integrin_aMb2_complex	JAM3		Adhesion by JAM	0	0	0.3527	8.302	AD	sig	Tau Microglia	MHC 2
CPI-SC071B77A18	JAM3_integrin_aMb2_complex	JAM3		Adhesion by JAM	0.0005	0.0057	0.2836	7.303	AD	sig	Tau Microglia	Monocyte
CPI-SC0C93C7670	C3_integrin_aMb2_complex	C3		Signaling by Complement	0.0005	0.0057	0.9641	51.065	AD	sig	DAM1	Homeostasis 1
CPI-SC0C93C7670	C3_integrin_aMb2_complex	C3		Signaling by Complement	0	0	1.0282	56.86	AD	sig	DAM1	MHC 2
CPI-SC0C93C7670	C3_integrin_aMb2_complex	C3		Signaling by Complement	0	0	1.1015	51.501	AD	sig	Homeostasis 1	DAM1
CPI-SC0C93C7670	C3_integrin_aMb2_complex	C3		Signaling by Complement	0	0	1.135	64.409	AD	sig	Homeostasis 1	Homeostasis 1
CPI-SC0C93C7670	C3_integrin_aMb2_complex	C3		Signaling by Complement	0	0	1.1175	64.123	AD	sig	Homeostasis 1	Homeostasis 2
CPI-SC0C93C7670	C3_integrin_aMb2_complex	C3		Signaling by Complement	0	0	1.0746	41.217	AD	sig	Homeostasis 1	Inflammation
CPI-SC0C93C7670	C3_integrin_aMb2_complex	C3		Signaling by Complement	0	0	0.9904	32.666	AD	sig	Homeostasis 1	T cell
CPI-SC0C93C7670	C3_integrin_aMb2_complex	C3		Signaling by Complement	0	0	1.0793	46.649	AD	sig	Homeostasis 1	MHC 1
CPI-SC0C93C7670	C3_integrin_aMb2_complex	C3		Signaling by Complement	0	0	1.1992	71.718	AD	sig	Homeostasis 1	MHC 2
CPI-SC0C93C7670	C3_integrin_aMb2_complex	C3		Signaling by Complement	0	0	1.009	34.203	AD	sig	Homeostasis 1	Macrophage
CPI-SC0C93C7670	C3_integrin_aMb2_complex	C3		Signaling by Complement	0	0	1.1301	63.088	AD	sig	Homeostasis 1	Monocyte
CPI-SC0C93C7670	C3_integrin_aMb2_complex	C3		Signaling by Complement	0	0	1.115	59.94	AD	sig	Homeostasis 1	Proliferation
CPI-SC0C93C7670	C3_integrin_aMb2_complex	C3		Signaling by Complement	0	0	1.0577	52.426	AD	sig	Homeostasis 1	Tau Microglia
CPI-SC0C93C7670	C3_integrin_aMb2_complex	C3		Signaling by Complement	0	0	1.1514	54.613	AD	sig	Homeostasis 2	DAM1
CPI-SC0C93C7670	C3_integrin_aMb2_complex	C3		Signaling by Complement	0	0	1.1849	68.301	AD	sig	Homeostasis 2	Homeostasis 1
CPI-SC0C93C7670	C3_integrin_aMb2_complex	C3		Signaling by Complement	0	0	1.1673	67.998	AD	sig	Homeostasis 2	Homeostasis 2
CPI-SC0C93C7670	C3_integrin_aMb2_complex	C3		Signaling by Complement	0	0	1.1245	43.708	AD	sig	Homeostasis 2	Inflammation
CPI-SC0C93C7670	C3_integrin_aMb2_complex	C3		Signaling by Complement	0	0	1.0402	34.64	AD	sig	Homeostasis 2	T cell
CPI-SC0C93C7670	C3_integrin_aMb2_complex	C3		Signaling by Complement	0	0	1.1291	49.468	AD	sig	Homeostasis 2	MHC 1
CPI-SC0C93C7670	C3_integrin_aMb2_complex	C3		Signaling by Complement	0	0	1.249	76.051	AD	sig	Homeostasis 2	MHC 2
CPI-SC0C93C7670	C3_integrin_aMb2_complex	C3		Signaling by Complement	0	0	1.0588	36.269	AD	sig	Homeostasis 2	Macrophage
CPI-SC0C93C7670	C3_integrin_aMb2_complex	C3		Signaling by Complement	0	0	1.1799	66.9	AD	sig	Homeostasis 2	Monocyte
CPI-SC0C93C7670	C3_integrin_aMb2_complex	C3		Signaling by Complement	0	0	1.1649	63.561	AD	sig	Homeostasis 2	Proliferation
CPI-SC0C93C7670	C3_integrin_aMb2_complex	C3		Signaling by Complement	0	0	1.1076	55.594	AD	sig	Homeostasis 2	Tau Microglia
CPI-SC0C93C7670	C3_integrin_aMb2_complex	C3		Signaling by Complement	0	0	1.427	71.81	AD	sig	Inflammation	DAM1
CPI-SC0C93C7670	C3_integrin_aMb2_complex	C3		Signaling by Complement	0	0	1.4604	89.809	AD	sig	Inflammation	Homeostasis 1
CPI-SC0C93C7670	C3_integrin_aMb2_complex	C3		Signaling by Complement	0	0	1.4429	89.41	AD	sig	Inflammation	Homeostasis 2
CPI-SC0C93C7670	C3_integrin_aMb2_complex	C3		Signaling by Complement	0	0	1.4	57.472	AD	sig	Inflammation	Inflammation
CPI-SC0C93C7670	C3_integrin_aMb2_complex	C3		Signaling by Complement	0	0	1.3158	45.548	AD	sig	Inflammation	T cell
CPI-SC0C93C7670	C3_integrin_aMb2_complex	C3		Signaling by Complement	0	0	1.4047	65.046	AD	sig	Inflammation	MHC 1
CPI-SC0C93C7670	C3_integrin_aMb2_complex	C3		Signaling by Complement	0	0	1.5246	100	AD	sig	Inflammation	MHC 2
CPI-SC0C93C7670	C3_integrin_aMb2_complex	C3		Signaling by Complement	0	0	1.3344	47.691	AD	sig	Inflammation	Macrophage
CPI-SC0C93C7670	C3_integrin_aMb2_complex	C3		Signaling by Complement	0	0	1.4555	87.967	AD	sig	Inflammation	Monocyte
CPI-SC0C93C7670	C3_integrin_aMb2_complex	C3		Signaling by Complement	0	0	1.4404	83.577	AD	sig	Inflammation	Proliferation
CPI-SC0C93C7670	C3_integrin_aMb2_complex	C3		Signaling by Complement	0	0	1.3832	73.101	AD	sig	Inflammation	Tau Microglia
CPI-SC0C93C7670	C3_integrin_aMb2_complex	C3		Signaling by Complement	0	0	1.15	54.524	AD	sig	MHC 2	DAM1
CPI-SC0C93C7670	C3_integrin_aMb2_complex	C3		Signaling by Complement	0	0	1.1834	68.19	AD	sig	MHC 2	Homeostasis 1
CPI-SC0C93C7670	C3_integrin_aMb2_complex	C3		Signaling by Complement	0	0	1.1659	67.887	AD	sig	MHC 2	Homeostasis 2
CPI-SC0C93C7670	C3_integrin_aMb2_complex	C3		Signaling by Complement	0	0	1.123	43.637	AD	sig	MHC 2	Inflammation
CPI-SC0C93C7670	C3_integrin_aMb2_complex	C3		Signaling by Complement	0.0049	0.0497	1.0388	34.583	AD	sig	MHC 2	T cell
CPI-SC0C93C7670	C3_integrin_aMb2_complex	C3		Signaling by Complement	0	0	1.1277	49.388	AD	sig	MHC 2	MHC 1
CPI-SC0C93C7670	C3_integrin_aMb2_complex	C3		Signaling by Complement	0	0	1.2476	75.928	AD	sig	MHC 2	MHC 2
CPI-SC0C93C7670	C3_integrin_aMb2_complex	C3		Signaling by Complement	0.0007	0.0079	1.0574	36.211	AD	sig	MHC 2	Macrophage
CPI-SC0C93C7670	C3_integrin_aMb2_complex	C3		Signaling by Complement	0	0	1.1785	66.792	AD	sig	MHC 2	Monocyte
CPI-SC0C93C7670	C3_integrin_aMb2_complex	C3		Signaling by Complement	0	0	1.1635	63.458	AD	sig	MHC 2	Proliferation
CPI-SC0C93C7670	C3_integrin_aMb2_complex	C3		Signaling by Complement	0	0	1.1062	55.504	AD	sig	MHC 2	Tau Microglia
CPI-SC0C93C7670	C3_integrin_aMb2_complex	C3		Signaling by Complement	0	0	1.0166	46.197	AD	sig	Proliferation	DAM1
CPI-SC0C93C7670	C3_integrin_aMb2_complex	C3		Signaling by Complement	0	0	1.05	57.775	AD	sig	Proliferation	Homeostasis 1
CPI-SC0C93C7670	C3_integrin_aMb2_complex	C3		Signaling by Complement	0	0	1.0325	57.519	AD	sig	Proliferation	Homeostasis 2
CPI-SC0C93C7670	C3_integrin_aMb2_complex	C3		Signaling by Complement	0.0032	0.0333	0.9943	41.845	AD	sig	Proliferation	MHC 1
CPI-SC0C93C7670	C3_integrin_aMb2_complex	C3		Signaling by Complement	0	0	1.1142	64.332	AD	sig	Proliferation	MHC 2
CPI-SC0C93C7670	C3_integrin_aMb2_complex	C3		Signaling by Complement	0	0	1.0451	56.591	AD	sig	Proliferation	Monocyte
CPI-SC0C93C7670	C3_integrin_aMb2_complex	C3		Signaling by Complement	0	0	1.0301	53.766	AD	sig	Proliferation	Proliferation
CPI-SC0C93C7670	C3_integrin_aMb2_complex	C3		Signaling by Complement	0	0	0.9983	45.057	AD	sig	Tau Microglia	DAM1
CPI-SC0C93C7670	C3_integrin_aMb2_complex	C3		Signaling by Complement	0	0	1.0318	56.35	AD	sig	Tau Microglia	Homeostasis 1
CPI-SC0C93C7670	C3_integrin_aMb2_complex	C3		Signaling by Complement	0	0	1.0142	56.101	AD	sig	Tau Microglia	Homeostasis 2
CPI-SC0C93C7670	C3_integrin_aMb2_complex	C3		Signaling by Complement	0.0022	0.0234	0.9714	36.06	AD	sig	Tau Microglia	Inflammation
CPI-SC0C93C7670	C3_integrin_aMb2_complex	C3		Signaling by Complement	0	0	0.976	40.813	AD	sig	Tau Microglia	MHC 1
CPI-SC0C93C7670	C3_integrin_aMb2_complex	C3		Signaling by Complement	0	0	1.0959	62.745	AD	sig	Tau Microglia	MHC 2
CPI-SC0C93C7670	C3_integrin_aMb2_complex	C3		Signaling by Complement	0	0	1.0268	55.195	AD	sig	Tau Microglia	Monocyte
CPI-SC0C93C7670	C3_integrin_aMb2_complex	C3		Signaling by Complement	0	0	1.0118	52.44	AD	sig	Tau Microglia	Proliferation
CPI-SC003905460	THY1_integrin_aMb2_complex	THY1		Adhesion by antigen THY1	0	0	0.2897	35.468	AD	sig	DAM1	Homeostasis 1
CPI-SC003905460	THY1_integrin_aMb2_complex	THY1		Adhesion by antigen THY1	0	0	0.3538	39.492	AD	sig	DAM1	MHC 2
CPI-SC003905460	THY1_integrin_aMb2_complex	THY1		Adhesion by antigen THY1	0	0	0.3188	71.81	AD	sig	Homeostasis 1	DAM1
CPI-SC003905460	THY1_integrin_aMb2_complex	THY1		Adhesion by antigen THY1	0	0	0.3522	89.809	AD	sig	Homeostasis 1	Homeostasis 1
CPI-SC003905460	THY1_integrin_aMb2_complex	THY1		Adhesion by antigen THY1	0	0	0.3347	89.41	AD	sig	Homeostasis 1	Homeostasis 2
CPI-SC003905460	THY1_integrin_aMb2_complex	THY1		Adhesion by antigen THY1	0	0	0.2918	57.472	AD	sig	Homeostasis 1	Inflammation
CPI-SC003905460	THY1_integrin_aMb2_complex	THY1		Adhesion by antigen THY1	0	0	0.2965	65.046	AD	sig	Homeostasis 1	MHC 1
CPI-SC003905460	THY1_integrin_aMb2_complex	THY1		Adhesion by antigen THY1	0	0	0.4164	100	AD	sig	Homeostasis 1	MHC 2
CPI-SC003905460	THY1_integrin_aMb2_complex	THY1		Adhesion by antigen THY1	0	0	0.3473	87.967	AD	sig	Homeostasis 1	Monocyte
CPI-SC003905460	THY1_integrin_aMb2_complex	THY1		Adhesion by antigen THY1	0	0	0.3322	83.577	AD	sig	Homeostasis 1	Proliferation
CPI-SC003905460	THY1_integrin_aMb2_complex	THY1		Adhesion by antigen THY1	0.0007	0.0079	0.275	73.101	AD	sig	Homeostasis 1	Tau Microglia
CPI-SC003905460	THY1_integrin_aMb2_complex	THY1		Adhesion by antigen THY1	0.0034	0.0352	0.2844	30.894	AD	sig	Homeostasis 2	Homeostasis 1
CPI-SC003905460	THY1_integrin_aMb2_complex	THY1		Adhesion by antigen THY1	0	0	0.3486	34.4	AD	sig	Homeostasis 2	MHC 2
CPI-SC003905460	THY1_integrin_aMb2_complex	THY1		Adhesion by antigen THY1	0.0002	0.0024	0.3352	21.449	AD	sig	T cell	MHC 2
CPI-SC003905460	THY1_integrin_aMb2_complex	THY1		Adhesion by antigen THY1	0	0	0.3079	51.283	AD	sig	MHC 1	Homeostasis 1
CPI-SC003905460	THY1_integrin_aMb2_complex	THY1		Adhesion by antigen THY1	0	0	0.372	57.103	AD	sig	MHC 1	MHC 2
CPI-SC003905460	THY1_integrin_aMb2_complex	THY1		Adhesion by antigen THY1	0.0003	0.0035	0.3029	50.232	AD	sig	MHC 1	Monocyte
CPI-SC003905460	THY1_integrin_aMb2_complex	THY1		Adhesion by antigen THY1	0	0	0.3608	46.231	AD	sig	MHC 2	MHC 2
CPI-SC003905460	THY1_integrin_aMb2_complex	THY1		Adhesion by antigen THY1	0	0	0.2945	39.696	AD	sig	Macrophage	Homeostasis 1
CPI-SC003905460	THY1_integrin_aMb2_complex	THY1		Adhesion by antigen THY1	0	0	0.3587	44.2	AD	sig	Macrophage	MHC 2
CPI-SC003905460	THY1_integrin_aMb2_complex	THY1		Adhesion by antigen THY1	0	0	0.3023	46.41	AD	sig	Monocyte	Homeostasis 1
CPI-SC003905460	THY1_integrin_aMb2_complex	THY1		Adhesion by antigen THY1	0	0	0.3664	51.677	AD	sig	Monocyte	MHC 2
CPI-SC003905460	THY1_integrin_aMb2_complex	THY1		Adhesion by antigen THY1	0.0044	0.045	0.2973	45.459	AD	sig	Monocyte	Monocyte
CPI-SC003905460	THY1_integrin_aMb2_complex	THY1		Adhesion by antigen THY1	0	0	0.2956	55.702	AD	sig	Proliferation	DAM1
CPI-SC003905460	THY1_integrin_aMb2_complex	THY1		Adhesion by antigen THY1	0	0	0.329	69.663	AD	sig	Proliferation	Homeostasis 1
CPI-SC003905460	THY1_integrin_aMb2_complex	THY1		Adhesion by antigen THY1	0	0	0.3115	69.354	AD	sig	Proliferation	Homeostasis 2
CPI-SC003905460	THY1_integrin_aMb2_complex	THY1		Adhesion by antigen THY1	0	0	0.3932	77.568	AD	sig	Proliferation	MHC 2
CPI-SC003905460	THY1_integrin_aMb2_complex	THY1		Adhesion by antigen THY1	0	0	0.3241	68.235	AD	sig	Proliferation	Monocyte
CPI-SC003905460	THY1_integrin_aMb2_complex	THY1		Adhesion by antigen THY1	0.0002	0.0024	0.3091	64.83	AD	sig	Proliferation	Proliferation
CPI-SC003905460	THY1_integrin_aMb2_complex	THY1		Adhesion by antigen THY1	0	0	0.2778	25.175	AD	sig	Tau Microglia	Homeostasis 1
CPI-SC003905460	THY1_integrin_aMb2_complex	THY1		Adhesion by antigen THY1	0	0	0.342	28.032	AD	sig	Tau Microglia	MHC 2
CPI-SC08CB03AD8	ICAM1_integrin_aXb2_complex	ICAM1		Adhesion by ICAM	0	0	0.2814	7.901	AD	sig	DAM1	Homeostasis 1
CPI-SC08CB03AD8	ICAM1_integrin_aXb2_complex	ICAM1		Adhesion by ICAM	0	0	0.3864	10.477	AD	sig	DAM1	MHC 2
CPI-SC08CB03AD8	ICAM1_integrin_aXb2_complex	ICAM1		Adhesion by ICAM	0	0	0.3839	10.995	AD	sig	DAM1	Monocyte
CPI-SC08CB03AD8	ICAM1_integrin_aXb2_complex	ICAM1		Adhesion by ICAM	0	0	0.2557	14.678	AD	sig	Homeostasis 1	DAM1
CPI-SC08CB03AD8	ICAM1_integrin_aXb2_complex	ICAM1		Adhesion by ICAM	0	0	0.2891	11.604	AD	sig	Homeostasis 1	Homeostasis 1
CPI-SC08CB03AD8	ICAM1_integrin_aXb2_complex	ICAM1		Adhesion by ICAM	0	0	0.3941	15.387	AD	sig	Homeostasis 1	MHC 2
CPI-SC08CB03AD8	ICAM1_integrin_aXb2_complex	ICAM1		Adhesion by ICAM	0	0	0.3916	16.147	AD	sig	Homeostasis 1	Monocyte
CPI-SC08CB03AD8	ICAM1_integrin_aXb2_complex	ICAM1		Adhesion by ICAM	0	0	0.2912	12.595	AD	sig	Homeostasis 2	Homeostasis 1
CPI-SC08CB03AD8	ICAM1_integrin_aXb2_complex	ICAM1		Adhesion by ICAM	0	0	0.3961	16.703	AD	sig	Homeostasis 2	MHC 2
CPI-SC08CB03AD8	ICAM1_integrin_aXb2_complex	ICAM1		Adhesion by ICAM	0	0	0.3937	17.528	AD	sig	Homeostasis 2	Monocyte
CPI-SC08CB03AD8	ICAM1_integrin_aXb2_complex	ICAM1		Adhesion by ICAM	0	0	0.3291	59.427	AD	sig	Inflammation	DAM1
CPI-SC08CB03AD8	ICAM1_integrin_aXb2_complex	ICAM1		Adhesion by ICAM	0	0	0.3626	46.978	AD	sig	Inflammation	Homeostasis 1
CPI-SC08CB03AD8	ICAM1_integrin_aXb2_complex	ICAM1		Adhesion by ICAM	0	0	0.345	59.826	AD	sig	Inflammation	Homeostasis 2
CPI-SC08CB03AD8	ICAM1_integrin_aXb2_complex	ICAM1		Adhesion by ICAM	0	0	0.3022	49.674	AD	sig	Inflammation	Inflammation
CPI-SC08CB03AD8	ICAM1_integrin_aXb2_complex	ICAM1		Adhesion by ICAM	0	0	0.3068	45.65	AD	sig	Inflammation	MHC 1
CPI-SC08CB03AD8	ICAM1_integrin_aXb2_complex	ICAM1		Adhesion by ICAM	0	0	0.4675	62.297	AD	sig	Inflammation	MHC 2
CPI-SC08CB03AD8	ICAM1_integrin_aXb2_complex	ICAM1		Adhesion by ICAM	0	0	0.4651	65.373	AD	sig	Inflammation	Monocyte
CPI-SC08CB03AD8	ICAM1_integrin_aXb2_complex	ICAM1		Adhesion by ICAM	0	0	0.2853	49.776	AD	sig	Inflammation	Tau Microglia
CPI-SC08CB03AD8	ICAM1_integrin_aXb2_complex	ICAM1		Adhesion by ICAM	0	0	0.265	0	AD	sig	T cell	Homeostasis 1
CPI-SC08CB03AD8	ICAM1_integrin_aXb2_complex	ICAM1		Adhesion by ICAM	0	0	0.37	0	AD	sig	T cell	MHC 2
CPI-SC08CB03AD8	ICAM1_integrin_aXb2_complex	ICAM1		Adhesion by ICAM	0	0	0.3675	0	AD	sig	T cell	Monocyte
CPI-SC08CB03AD8	ICAM1_integrin_aXb2_complex	ICAM1		Adhesion by ICAM	0	0	0.2566	15.239	AD	sig	MHC 1	DAM1
CPI-SC08CB03AD8	ICAM1_integrin_aXb2_complex	ICAM1		Adhesion by ICAM	0	0	0.29	12.047	AD	sig	MHC 1	Homeostasis 1
CPI-SC08CB03AD8	ICAM1_integrin_aXb2_complex	ICAM1		Adhesion by ICAM	0.0044	0.045	0.2725	15.342	AD	sig	MHC 1	Homeostasis 2
CPI-SC08CB03AD8	ICAM1_integrin_aXb2_complex	ICAM1		Adhesion by ICAM	0	0	0.395	15.975	AD	sig	MHC 1	MHC 2
CPI-SC08CB03AD8	ICAM1_integrin_aXb2_complex	ICAM1		Adhesion by ICAM	0	0	0.3925	16.764	AD	sig	MHC 1	Monocyte
CPI-SC08CB03AD8	ICAM1_integrin_aXb2_complex	ICAM1		Adhesion by ICAM	0	0	0.3046	19.052	AD	sig	MHC 2	Homeostasis 1
CPI-SC08CB03AD8	ICAM1_integrin_aXb2_complex	ICAM1		Adhesion by ICAM	0.0024	0.0254	0.287	24.263	AD	sig	MHC 2	Homeostasis 2
CPI-SC08CB03AD8	ICAM1_integrin_aXb2_complex	ICAM1		Adhesion by ICAM	0	0	0.4095	25.265	AD	sig	MHC 2	MHC 2
CPI-SC08CB03AD8	ICAM1_integrin_aXb2_complex	ICAM1		Adhesion by ICAM	0	0	0.4071	26.512	AD	sig	MHC 2	Monocyte
CPI-SC08CB03AD8	ICAM1_integrin_aXb2_complex	ICAM1		Adhesion by ICAM	0	0	0.2637	19.599	AD	sig	Macrophage	DAM1
CPI-SC08CB03AD8	ICAM1_integrin_aXb2_complex	ICAM1		Adhesion by ICAM	0	0	0.2972	15.493	AD	sig	Macrophage	Homeostasis 1
CPI-SC08CB03AD8	ICAM1_integrin_aXb2_complex	ICAM1		Adhesion by ICAM	0.0004	0.0046	0.2796	19.731	AD	sig	Macrophage	Homeostasis 2
CPI-SC08CB03AD8	ICAM1_integrin_aXb2_complex	ICAM1		Adhesion by ICAM	0	0	0.4021	20.546	AD	sig	Macrophage	MHC 2
CPI-SC08CB03AD8	ICAM1_integrin_aXb2_complex	ICAM1		Adhesion by ICAM	0	0	0.3997	21.56	AD	sig	Macrophage	Monocyte
CPI-SC08CB03AD8	ICAM1_integrin_aXb2_complex	ICAM1		Adhesion by ICAM	0	0	0.2842	32.067	AD	sig	Monocyte	DAM1
CPI-SC08CB03AD8	ICAM1_integrin_aXb2_complex	ICAM1		Adhesion by ICAM	0	0	0.3177	25.349	AD	sig	Monocyte	Homeostasis 1
CPI-SC08CB03AD8	ICAM1_integrin_aXb2_complex	ICAM1		Adhesion by ICAM	0	0	0.3001	32.282	AD	sig	Monocyte	Homeostasis 2
CPI-SC08CB03AD8	ICAM1_integrin_aXb2_complex	ICAM1		Adhesion by ICAM	0	0	0.4226	33.616	AD	sig	Monocyte	MHC 2
CPI-SC08CB03AD8	ICAM1_integrin_aXb2_complex	ICAM1		Adhesion by ICAM	0	0	0.4202	35.276	AD	sig	Monocyte	Monocyte
CPI-SC08CB03AD8	ICAM1_integrin_aXb2_complex	ICAM1		Adhesion by ICAM	0	0	0.2834	8.858	AD	sig	Proliferation	Homeostasis 1
CPI-SC08CB03AD8	ICAM1_integrin_aXb2_complex	ICAM1		Adhesion by ICAM	0	0	0.3883	11.747	AD	sig	Proliferation	MHC 2
CPI-SC08CB03AD8	ICAM1_integrin_aXb2_complex	ICAM1		Adhesion by ICAM	0	0	0.3859	12.327	AD	sig	Proliferation	Monocyte
CPI-SC08CB03AD8	ICAM1_integrin_aXb2_complex	ICAM1		Adhesion by ICAM	0	0	0.2707	2.726	AD	sig	Tau Microglia	Homeostasis 1
CPI-SC08CB03AD8	ICAM1_integrin_aXb2_complex	ICAM1		Adhesion by ICAM	0	0	0.3756	3.615	AD	sig	Tau Microglia	MHC 2
CPI-SC08CB03AD8	ICAM1_integrin_aXb2_complex	ICAM1		Adhesion by ICAM	0	0	0.3732	3.793	AD	sig	Tau Microglia	Monocyte
CPI-SC0EFDBED2D	THY1_integrin_aXb2_complex	THY1		Adhesion by antigen THY1	0	0	0.2897	28.38	AD	sig	DAM1	Homeostasis 1
CPI-SC0EFDBED2D	THY1_integrin_aXb2_complex	THY1		Adhesion by antigen THY1	0	0	0.3946	37.634	AD	sig	DAM1	MHC 2
CPI-SC0EFDBED2D	THY1_integrin_aXb2_complex	THY1		Adhesion by antigen THY1	0	0	0.3922	39.492	AD	sig	DAM1	Monocyte
CPI-SC0EFDBED2D	THY1_integrin_aXb2_complex	THY1		Adhesion by antigen THY1	0	0	0.3188	90.904	AD	sig	Homeostasis 1	DAM1
CPI-SC0EFDBED2D	THY1_integrin_aXb2_complex	THY1		Adhesion by antigen THY1	0	0	0.3522	71.861	AD	sig	Homeostasis 1	Homeostasis 1
CPI-SC0EFDBED2D	THY1_integrin_aXb2_complex	THY1		Adhesion by antigen THY1	0	0	0.3347	91.514	AD	sig	Homeostasis 1	Homeostasis 2
CPI-SC0EFDBED2D	THY1_integrin_aXb2_complex	THY1		Adhesion by antigen THY1	0	0	0.2918	75.986	AD	sig	Homeostasis 1	Inflammation
CPI-SC0EFDBED2D	THY1_integrin_aXb2_complex	THY1		Adhesion by antigen THY1	0	0	0.2965	69.83	AD	sig	Homeostasis 1	MHC 1
CPI-SC0EFDBED2D	THY1_integrin_aXb2_complex	THY1		Adhesion by antigen THY1	0	0	0.4572	95.294	AD	sig	Homeostasis 1	MHC 2
CPI-SC0EFDBED2D	THY1_integrin_aXb2_complex	THY1		Adhesion by antigen THY1	0	0	0.4547	100	AD	sig	Homeostasis 1	Monocyte
CPI-SC0EFDBED2D	THY1_integrin_aXb2_complex	THY1		Adhesion by antigen THY1	0.0007	0.0079	0.275	76.141	AD	sig	Homeostasis 1	Tau Microglia
CPI-SC0EFDBED2D	THY1_integrin_aXb2_complex	THY1		Adhesion by antigen THY1	0.0034	0.0352	0.2844	24.72	AD	sig	Homeostasis 2	Homeostasis 1
CPI-SC0EFDBED2D	THY1_integrin_aXb2_complex	THY1		Adhesion by antigen THY1	0	0	0.3893	32.781	AD	sig	Homeostasis 2	MHC 2
CPI-SC0EFDBED2D	THY1_integrin_aXb2_complex	THY1		Adhesion by antigen THY1	0	0	0.3869	34.4	AD	sig	Homeostasis 2	Monocyte
CPI-SC0EFDBED2D	THY1_integrin_aXb2_complex	THY1		Adhesion by antigen THY1	0	0	0.3759	20.439	AD	sig	T cell	MHC 2
CPI-SC0EFDBED2D	THY1_integrin_aXb2_complex	THY1		Adhesion by antigen THY1	0	0	0.3735	21.449	AD	sig	T cell	Monocyte
CPI-SC0EFDBED2D	THY1_integrin_aXb2_complex	THY1		Adhesion by antigen THY1	0	0	0.3079	41.034	AD	sig	MHC 1	Homeostasis 1
CPI-SC0EFDBED2D	THY1_integrin_aXb2_complex	THY1		Adhesion by antigen THY1	0	0	0.4128	54.415	AD	sig	MHC 1	MHC 2
CPI-SC0EFDBED2D	THY1_integrin_aXb2_complex	THY1		Adhesion by antigen THY1	0	0	0.4104	57.103	AD	sig	MHC 1	Monocyte
CPI-SC0EFDBED2D	THY1_integrin_aXb2_complex	THY1		Adhesion by antigen THY1	0	0	0.4016	44.056	AD	sig	MHC 2	MHC 2
CPI-SC0EFDBED2D	THY1_integrin_aXb2_complex	THY1		Adhesion by antigen THY1	0	0	0.3991	46.231	AD	sig	MHC 2	Monocyte
CPI-SC0EFDBED2D	THY1_integrin_aXb2_complex	THY1		Adhesion by antigen THY1	0	0	0.2945	31.763	AD	sig	Macrophage	Homeostasis 1
CPI-SC0EFDBED2D	THY1_integrin_aXb2_complex	THY1		Adhesion by antigen THY1	0	0	0.3995	42.12	AD	sig	Macrophage	MHC 2
CPI-SC0EFDBED2D	THY1_integrin_aXb2_complex	THY1		Adhesion by antigen THY1	0	0	0.397	44.2	AD	sig	Macrophage	Monocyte
CPI-SC0EFDBED2D	THY1_integrin_aXb2_complex	THY1		Adhesion by antigen THY1	0	0	0.3023	37.135	AD	sig	Monocyte	Homeostasis 1
CPI-SC0EFDBED2D	THY1_integrin_aXb2_complex	THY1		Adhesion by antigen THY1	0	0	0.4072	49.245	AD	sig	Monocyte	MHC 2
CPI-SC0EFDBED2D	THY1_integrin_aXb2_complex	THY1		Adhesion by antigen THY1	0	0	0.4048	51.677	AD	sig	Monocyte	Monocyte
CPI-SC0EFDBED2D	THY1_integrin_aXb2_complex	THY1		Adhesion by antigen THY1	0	0	0.2956	70.512	AD	sig	Proliferation	DAM1
CPI-SC0EFDBED2D	THY1_integrin_aXb2_complex	THY1		Adhesion by antigen THY1	0	0	0.329	55.741	AD	sig	Proliferation	Homeostasis 1
CPI-SC0EFDBED2D	THY1_integrin_aXb2_complex	THY1		Adhesion by antigen THY1	0	0	0.3115	70.986	AD	sig	Proliferation	Homeostasis 2
CPI-SC0EFDBED2D	THY1_integrin_aXb2_complex	THY1		Adhesion by antigen THY1	0	0	0.434	73.918	AD	sig	Proliferation	MHC 2
CPI-SC0EFDBED2D	THY1_integrin_aXb2_complex	THY1		Adhesion by antigen THY1	0	0	0.4315	77.568	AD	sig	Proliferation	Monocyte
CPI-SC0EFDBED2D	THY1_integrin_aXb2_complex	THY1		Adhesion by antigen THY1	0	0	0.2778	20.144	AD	sig	Tau Microglia	Homeostasis 1
CPI-SC0EFDBED2D	THY1_integrin_aXb2_complex	THY1		Adhesion by antigen THY1	0	0	0.3828	26.713	AD	sig	Tau Microglia	MHC 2
CPI-SC0EFDBED2D	THY1_integrin_aXb2_complex	THY1		Adhesion by antigen THY1	0	0	0.3803	28.032	AD	sig	Tau Microglia	Monocyte
CPI-SC0B80B8591	THBS1_integrin_a3b1_complex	THBS1		Adhesion by Thrombospondin	0	0	0.2795	30.14	AD	sig	Monocyte	DAM1
CPI-SC0B80B8591	THBS1_integrin_a3b1_complex	THBS1		Adhesion by Thrombospondin	0	0	0.2805	33.238	AD	sig	Monocyte	Homeostasis 1
CPI-SC0B80B8591	THBS1_integrin_a3b1_complex	THBS1		Adhesion by Thrombospondin	0	0	0.2858	52.131	AD	sig	Monocyte	T cell
CPI-SC0B80B8591	THBS1_integrin_a3b1_complex	THBS1		Adhesion by Thrombospondin	0	0	0.2787	32.555	AD	sig	Monocyte	MHC 1
CPI-SC0B80B8591	THBS1_integrin_a3b1_complex	THBS1		Adhesion by Thrombospondin	0	0	0.2779	28.649	AD	sig	Monocyte	Macrophage
CPI-SC0B80B8591	THBS1_integrin_a3b1_complex	THBS1		Adhesion by Thrombospondin	0	0	0.2796	40.539	AD	sig	Monocyte	Monocyte
CPI-SC0B80B8591	THBS1_integrin_a3b1_complex	THBS1		Adhesion by Thrombospondin	0	0	0.2794	37.876	AD	sig	Monocyte	Proliferation
CPI-SC0F96CE387	FN1_integrin_a4b1_complex	FN1		Adhesion by Fibronectin	0	0	0.306	22.349	AD	sig	DAM1	T cell
CPI-SC0F96CE387	FN1_integrin_a4b1_complex	FN1		Adhesion by Fibronectin	0	0	0.2966	20.394	AD	sig	DAM1	Monocyte
CPI-SC0F96CE387	FN1_integrin_a4b1_complex	FN1		Adhesion by Fibronectin	0	0	0.3006	15.431	AD	sig	Homeostasis 1	T cell
CPI-SC0F96CE387	FN1_integrin_a4b1_complex	FN1		Adhesion by Fibronectin	0	0	0.2912	14.081	AD	sig	Homeostasis 1	Monocyte
CPI-SC0F96CE387	FN1_integrin_a4b1_complex	FN1		Adhesion by Fibronectin	0	0	0.3055	21.68	AD	sig	Inflammation	T cell
CPI-SC0F96CE387	FN1_integrin_a4b1_complex	FN1		Adhesion by Fibronectin	0	0	0.2961	19.783	AD	sig	Inflammation	Monocyte
CPI-SC0F96CE387	FN1_integrin_a4b1_complex	FN1		Adhesion by Fibronectin	0	0	0.3037	19.408	AD	sig	T cell	T cell
CPI-SC0F96CE387	FN1_integrin_a4b1_complex	FN1		Adhesion by Fibronectin	0	0	0.2943	17.71	AD	sig	T cell	Monocyte
CPI-SC0F96CE387	FN1_integrin_a4b1_complex	FN1		Adhesion by Fibronectin	0	0	0.2966	10.306	AD	sig	MHC 1	T cell
CPI-SC0F96CE387	FN1_integrin_a4b1_complex	FN1		Adhesion by Fibronectin	0	0	0.2871	9.404	AD	sig	MHC 1	Monocyte
CPI-SC0F96CE387	FN1_integrin_a4b1_complex	FN1		Adhesion by Fibronectin	0	0	0.3026	17.959	AD	sig	Macrophage	T cell
CPI-SC0F96CE387	FN1_integrin_a4b1_complex	FN1		Adhesion by Fibronectin	0	0	0.2932	16.388	AD	sig	Macrophage	Monocyte
CPI-SC0F96CE387	FN1_integrin_a4b1_complex	FN1		Adhesion by Fibronectin	0	0	0.3107	28.217	AD	sig	Monocyte	T cell
CPI-SC0F96CE387	FN1_integrin_a4b1_complex	FN1		Adhesion by Fibronectin	0	0	0.3012	25.749	AD	sig	Monocyte	Monocyte
CPI-SC0F96CE387	FN1_integrin_a4b1_complex	FN1		Adhesion by Fibronectin	0	0	0.301	15.949	AD	sig	Proliferation	T cell
CPI-SC0F96CE387	FN1_integrin_a4b1_complex	FN1		Adhesion by Fibronectin	0	0	0.2916	14.554	AD	sig	Proliferation	Monocyte
CPI-SC0F96CE387	FN1_integrin_a4b1_complex	FN1		Adhesion by Fibronectin	0	0	0.3037	19.377	AD	sig	Tau Microglia	T cell
CPI-SC0F96CE387	FN1_integrin_a4b1_complex	FN1		Adhesion by Fibronectin	0	0	0.2943	17.682	AD	sig	Tau Microglia	Monocyte
CPI-SC0C2126F8E	JAM2_integrin_a4b1_complex	JAM2		Adhesion by JAM	0	0	0.4033	78.005	AD	sig	DAM1	T cell
CPI-SC0C2126F8E	JAM2_integrin_a4b1_complex	JAM2		Adhesion by JAM	0	0	0.2045	21.925	AD	sig	DAM1	Macrophage
CPI-SC0C2126F8E	JAM2_integrin_a4b1_complex	JAM2		Adhesion by JAM	0	0	0.3939	71.182	AD	sig	DAM1	Monocyte
CPI-SC0C2126F8E	JAM2_integrin_a4b1_complex	JAM2		Adhesion by JAM	0	0	0.3645	51.637	AD	sig	Homeostasis 1	T cell
CPI-SC0C2126F8E	JAM2_integrin_a4b1_complex	JAM2		Adhesion by JAM	0	0	0.3551	47.12	AD	sig	Homeostasis 1	Monocyte
CPI-SC0C2126F8E	JAM2_integrin_a4b1_complex	JAM2		Adhesion by JAM	0	0	0.4104	82.808	AD	sig	Homeostasis 2	T cell
CPI-SC0C2126F8E	JAM2_integrin_a4b1_complex	JAM2		Adhesion by JAM	0	0	0.2116	23.275	AD	sig	Homeostasis 2	Macrophage
CPI-SC0C2126F8E	JAM2_integrin_a4b1_complex	JAM2		Adhesion by JAM	0	0	0.401	75.564	AD	sig	Homeostasis 2	Monocyte
CPI-SC0C2126F8E	JAM2_integrin_a4b1_complex	JAM2		Adhesion by JAM	0	0	0.3389	34.236	AD	sig	Inflammation	T cell
CPI-SC0C2126F8E	JAM2_integrin_a4b1_complex	JAM2		Adhesion by JAM	0	0	0.3295	31.241	AD	sig	Inflammation	Monocyte
CPI-SC0C2126F8E	JAM2_integrin_a4b1_complex	JAM2		Adhesion by JAM	0	0	0.3083	13.447	AD	sig	T cell	T cell
CPI-SC0C2126F8E	JAM2_integrin_a4b1_complex	JAM2		Adhesion by JAM	0	0	0.2988	12.271	AD	sig	T cell	Monocyte
CPI-SC0C2126F8E	JAM2_integrin_a4b1_complex	JAM2		Adhesion by JAM	0	0	0.3578	47.104	AD	sig	MHC 1	T cell
CPI-SC0C2126F8E	JAM2_integrin_a4b1_complex	JAM2		Adhesion by JAM	0	0	0.3484	42.984	AD	sig	MHC 1	Monocyte
CPI-SC0C2126F8E	JAM2_integrin_a4b1_complex	JAM2		Adhesion by JAM	0	0	0.4013	76.636	AD	sig	MHC 2	T cell
CPI-SC0C2126F8E	JAM2_integrin_a4b1_complex	JAM2		Adhesion by JAM	0.0002	0.0024	0.2025	21.54	AD	sig	MHC 2	Macrophage
CPI-SC0C2126F8E	JAM2_integrin_a4b1_complex	JAM2		Adhesion by JAM	0	0	0.3919	69.932	AD	sig	MHC 2	Monocyte
CPI-SC0C2126F8E	JAM2_integrin_a4b1_complex	JAM2		Adhesion by JAM	0	0	0.3165	19.037	AD	sig	Macrophage	T cell
CPI-SC0C2126F8E	JAM2_integrin_a4b1_complex	JAM2		Adhesion by JAM	0	0	0.3071	17.372	AD	sig	Macrophage	Monocyte
CPI-SC0C2126F8E	JAM2_integrin_a4b1_complex	JAM2		Adhesion by JAM	0	0	0.303	9.846	AD	sig	Monocyte	T cell
CPI-SC0C2126F8E	JAM2_integrin_a4b1_complex	JAM2		Adhesion by JAM	0	0	0.2935	8.985	AD	sig	Monocyte	Monocyte
CPI-SC0C2126F8E	JAM2_integrin_a4b1_complex	JAM2		Adhesion by JAM	0	0	0.4087	81.644	AD	sig	Proliferation	T cell
CPI-SC0C2126F8E	JAM2_integrin_a4b1_complex	JAM2		Adhesion by JAM	0	0	0.2099	22.948	AD	sig	Proliferation	Macrophage
CPI-SC0C2126F8E	JAM2_integrin_a4b1_complex	JAM2		Adhesion by JAM	0	0	0.3993	74.502	AD	sig	Proliferation	Monocyte
CPI-SC0C2126F8E	JAM2_integrin_a4b1_complex	JAM2		Adhesion by JAM	0	0	0.4179	87.882	AD	sig	Tau Microglia	T cell
CPI-SC0C2126F8E	JAM2_integrin_a4b1_complex	JAM2		Adhesion by JAM	0	0	0.2191	24.702	AD	sig	Tau Microglia	Macrophage
CPI-SC0C2126F8E	JAM2_integrin_a4b1_complex	JAM2		Adhesion by JAM	0	0	0.4085	80.195	AD	sig	Tau Microglia	Monocyte
CPI-SC0C81483EA	SPP1_integrin_a4b1_complex	SPP1		Adhesion by Osteopontin	0	0	0.8659	6.77	AD	sig	DAM1	DAM1
CPI-SC0C81483EA	SPP1_integrin_a4b1_complex	SPP1		Adhesion by Osteopontin	0	0	0.8627	6.68	AD	sig	DAM1	Inflammation
CPI-SC0C81483EA	SPP1_integrin_a4b1_complex	SPP1		Adhesion by Osteopontin	0	0	1.1212	40.947	AD	sig	DAM1	T cell
CPI-SC0C81483EA	SPP1_integrin_a4b1_complex	SPP1		Adhesion by Osteopontin	0	0	0.8543	6.122	AD	sig	DAM1	MHC 1
CPI-SC0C81483EA	SPP1_integrin_a4b1_complex	SPP1		Adhesion by Osteopontin	0	0	0.9224	11.509	AD	sig	DAM1	Macrophage
CPI-SC0C81483EA	SPP1_integrin_a4b1_complex	SPP1		Adhesion by Osteopontin	0	0	1.1118	37.365	AD	sig	DAM1	Monocyte
CPI-SC0C81483EA	SPP1_integrin_a4b1_complex	SPP1		Adhesion by Osteopontin	0	0	0.8666	8.631	AD	sig	DAM1	Proliferation
CPI-SC0C81483EA	SPP1_integrin_a4b1_complex	SPP1		Adhesion by Osteopontin	0	0	1.1551	9.612	AD	sig	Homeostasis 1	DAM1
CPI-SC0C81483EA	SPP1_integrin_a4b1_complex	SPP1		Adhesion by Osteopontin	0	0	1.1324	5.675	AD	sig	Homeostasis 1	Homeostasis 1
CPI-SC0C81483EA	SPP1_integrin_a4b1_complex	SPP1		Adhesion by Osteopontin	0	0	1.1519	9.484	AD	sig	Homeostasis 1	Inflammation
CPI-SC0C81483EA	SPP1_integrin_a4b1_complex	SPP1		Adhesion by Osteopontin	0	0	1.4104	58.137	AD	sig	Homeostasis 1	T cell
CPI-SC0C81483EA	SPP1_integrin_a4b1_complex	SPP1		Adhesion by Osteopontin	0	0	1.1435	8.693	AD	sig	Homeostasis 1	MHC 1
CPI-SC0C81483EA	SPP1_integrin_a4b1_complex	SPP1		Adhesion by Osteopontin	0	0	1.1387	8.406	AD	sig	Homeostasis 1	MHC 2
CPI-SC0C81483EA	SPP1_integrin_a4b1_complex	SPP1		Adhesion by Osteopontin	0	0	1.2116	16.341	AD	sig	Homeostasis 1	Macrophage
CPI-SC0C81483EA	SPP1_integrin_a4b1_complex	SPP1		Adhesion by Osteopontin	0	0	1.401	53.052	AD	sig	Homeostasis 1	Monocyte
CPI-SC0C81483EA	SPP1_integrin_a4b1_complex	SPP1		Adhesion by Osteopontin	0	0	1.1557	12.254	AD	sig	Homeostasis 1	Proliferation
CPI-SC0C81483EA	SPP1_integrin_a4b1_complex	SPP1		Adhesion by Osteopontin	0	0	1.1302	9.367	AD	sig	Homeostasis 2	DAM1
CPI-SC0C81483EA	SPP1_integrin_a4b1_complex	SPP1		Adhesion by Osteopontin	0	0	1.1075	5.531	AD	sig	Homeostasis 2	Homeostasis 1
CPI-SC0C81483EA	SPP1_integrin_a4b1_complex	SPP1		Adhesion by Osteopontin	0	0	1.127	9.242	AD	sig	Homeostasis 2	Inflammation
CPI-SC0C81483EA	SPP1_integrin_a4b1_complex	SPP1		Adhesion by Osteopontin	0	0	1.3855	56.656	AD	sig	Homeostasis 2	T cell
CPI-SC0C81483EA	SPP1_integrin_a4b1_complex	SPP1		Adhesion by Osteopontin	0	0	1.1186	8.471	AD	sig	Homeostasis 2	MHC 1
CPI-SC0C81483EA	SPP1_integrin_a4b1_complex	SPP1		Adhesion by Osteopontin	0	0	1.1138	8.192	AD	sig	Homeostasis 2	MHC 2
CPI-SC0C81483EA	SPP1_integrin_a4b1_complex	SPP1		Adhesion by Osteopontin	0	0	1.1867	15.925	AD	sig	Homeostasis 2	Macrophage
CPI-SC0C81483EA	SPP1_integrin_a4b1_complex	SPP1		Adhesion by Osteopontin	0	0	1.3761	51.7	AD	sig	Homeostasis 2	Monocyte
CPI-SC0C81483EA	SPP1_integrin_a4b1_complex	SPP1		Adhesion by Osteopontin	0	0	1.1308	11.942	AD	sig	Homeostasis 2	Proliferation
CPI-SC0C81483EA	SPP1_integrin_a4b1_complex	SPP1		Adhesion by Osteopontin	0	0	1.5727	13.716	AD	sig	Inflammation	DAM1
CPI-SC0C81483EA	SPP1_integrin_a4b1_complex	SPP1		Adhesion by Osteopontin	0	0	1.55	8.099	AD	sig	Inflammation	Homeostasis 1
CPI-SC0C81483EA	SPP1_integrin_a4b1_complex	SPP1		Adhesion by Osteopontin	0	0	1.5695	13.533	AD	sig	Inflammation	Inflammation
CPI-SC0C81483EA	SPP1_integrin_a4b1_complex	SPP1		Adhesion by Osteopontin	0	0	1.828	82.962	AD	sig	Inflammation	T cell
CPI-SC0C81483EA	SPP1_integrin_a4b1_complex	SPP1		Adhesion by Osteopontin	0	0	1.5611	12.404	AD	sig	Inflammation	MHC 1
CPI-SC0C81483EA	SPP1_integrin_a4b1_complex	SPP1		Adhesion by Osteopontin	0	0	1.5563	11.996	AD	sig	Inflammation	MHC 2
CPI-SC0C81483EA	SPP1_integrin_a4b1_complex	SPP1		Adhesion by Osteopontin	0	0	1.6292	23.319	AD	sig	Inflammation	Macrophage
CPI-SC0C81483EA	SPP1_integrin_a4b1_complex	SPP1		Adhesion by Osteopontin	0	0	1.8186	75.705	AD	sig	Inflammation	Monocyte
CPI-SC0C81483EA	SPP1_integrin_a4b1_complex	SPP1		Adhesion by Osteopontin	0	0	1.5733	17.487	AD	sig	Inflammation	Proliferation
CPI-SC0C81483EA	SPP1_integrin_a4b1_complex	SPP1		Adhesion by Osteopontin	0	0	0.8793	6.902	AD	sig	MHC 1	DAM1
CPI-SC0C81483EA	SPP1_integrin_a4b1_complex	SPP1		Adhesion by Osteopontin	0.0001	0.0012	0.8567	4.075	AD	sig	MHC 1	Homeostasis 1
CPI-SC0C81483EA	SPP1_integrin_a4b1_complex	SPP1		Adhesion by Osteopontin	0	0	0.8761	6.81	AD	sig	MHC 1	Inflammation
CPI-SC0C81483EA	SPP1_integrin_a4b1_complex	SPP1		Adhesion by Osteopontin	0	0	1.1347	41.746	AD	sig	MHC 1	T cell
CPI-SC0C81483EA	SPP1_integrin_a4b1_complex	SPP1		Adhesion by Osteopontin	0	0	0.8678	6.242	AD	sig	MHC 1	MHC 1
CPI-SC0C81483EA	SPP1_integrin_a4b1_complex	SPP1		Adhesion by Osteopontin	0	0	0.9358	11.734	AD	sig	MHC 1	Macrophage
CPI-SC0C81483EA	SPP1_integrin_a4b1_complex	SPP1		Adhesion by Osteopontin	0	0	1.1253	38.094	AD	sig	MHC 1	Monocyte
CPI-SC0C81483EA	SPP1_integrin_a4b1_complex	SPP1		Adhesion by Osteopontin	0	0	0.88	8.799	AD	sig	MHC 1	Proliferation
CPI-SC0C81483EA	SPP1_integrin_a4b1_complex	SPP1		Adhesion by Osteopontin	0	0	1.429	12.304	AD	sig	MHC 2	DAM1
CPI-SC0C81483EA	SPP1_integrin_a4b1_complex	SPP1		Adhesion by Osteopontin	0	0	1.4064	7.265	AD	sig	MHC 2	Homeostasis 1
CPI-SC0C81483EA	SPP1_integrin_a4b1_complex	SPP1		Adhesion by Osteopontin	0	0	1.4258	12.14	AD	sig	MHC 2	Inflammation
CPI-SC0C81483EA	SPP1_integrin_a4b1_complex	SPP1		Adhesion by Osteopontin	0	0	1.6844	74.421	AD	sig	MHC 2	T cell
CPI-SC0C81483EA	SPP1_integrin_a4b1_complex	SPP1		Adhesion by Osteopontin	0	0	1.4175	11.127	AD	sig	MHC 2	MHC 1
CPI-SC0C81483EA	SPP1_integrin_a4b1_complex	SPP1		Adhesion by Osteopontin	0	0	1.4127	10.761	AD	sig	MHC 2	MHC 2
CPI-SC0C81483EA	SPP1_integrin_a4b1_complex	SPP1		Adhesion by Osteopontin	0	0	1.4855	20.918	AD	sig	MHC 2	Macrophage
CPI-SC0C81483EA	SPP1_integrin_a4b1_complex	SPP1		Adhesion by Osteopontin	0	0	1.6749	67.911	AD	sig	MHC 2	Monocyte
CPI-SC0C81483EA	SPP1_integrin_a4b1_complex	SPP1		Adhesion by Osteopontin	0	0	1.4297	15.687	AD	sig	MHC 2	Proliferation
CPI-SC0C81483EA	SPP1_integrin_a4b1_complex	SPP1		Adhesion by Osteopontin	0	0	1.0629	8.706	AD	sig	Proliferation	DAM1
CPI-SC0C81483EA	SPP1_integrin_a4b1_complex	SPP1		Adhesion by Osteopontin	0	0	1.0402	5.14	AD	sig	Proliferation	Homeostasis 1
CPI-SC0C81483EA	SPP1_integrin_a4b1_complex	SPP1		Adhesion by Osteopontin	0	0	1.0597	8.59	AD	sig	Proliferation	Inflammation
CPI-SC0C81483EA	SPP1_integrin_a4b1_complex	SPP1		Adhesion by Osteopontin	0	0	1.3183	52.658	AD	sig	Proliferation	T cell
CPI-SC0C81483EA	SPP1_integrin_a4b1_complex	SPP1		Adhesion by Osteopontin	0	0	1.0513	7.873	AD	sig	Proliferation	MHC 1
CPI-SC0C81483EA	SPP1_integrin_a4b1_complex	SPP1		Adhesion by Osteopontin	0	0	1.0466	7.614	AD	sig	Proliferation	MHC 2
CPI-SC0C81483EA	SPP1_integrin_a4b1_complex	SPP1		Adhesion by Osteopontin	0	0	1.1194	14.801	AD	sig	Proliferation	Macrophage
CPI-SC0C81483EA	SPP1_integrin_a4b1_complex	SPP1		Adhesion by Osteopontin	0	0	1.3088	48.052	AD	sig	Proliferation	Monocyte
CPI-SC0C81483EA	SPP1_integrin_a4b1_complex	SPP1		Adhesion by Osteopontin	0	0	1.0636	11.099	AD	sig	Proliferation	Proliferation
CPI-SC00B50273B	TNC_integrin_a4b1_complex	TNC		Adhesion by tenascin	0	0	0.3019	19.262	AD	sig	DAM1	T cell
CPI-SC00B50273B	TNC_integrin_a4b1_complex	TNC		Adhesion by tenascin	0	0	0.2925	17.577	AD	sig	DAM1	Monocyte
CPI-SC00B50273B	TNC_integrin_a4b1_complex	TNC		Adhesion by tenascin	0	0	0.2978	13.413	AD	sig	Homeostasis 1	T cell
CPI-SC00B50273B	TNC_integrin_a4b1_complex	TNC		Adhesion by tenascin	0	0	0.2884	12.24	AD	sig	Homeostasis 1	Monocyte
CPI-SC00B50273B	TNC_integrin_a4b1_complex	TNC		Adhesion by tenascin	0	0	0.3011	18.082	AD	sig	Homeostasis 2	T cell
CPI-SC00B50273B	TNC_integrin_a4b1_complex	TNC		Adhesion by tenascin	0	0	0.2917	16.5	AD	sig	Homeostasis 2	Monocyte
CPI-SC00B50273B	TNC_integrin_a4b1_complex	TNC		Adhesion by tenascin	0	0	0.3156	38.948	AD	sig	Inflammation	T cell
CPI-SC00B50273B	TNC_integrin_a4b1_complex	TNC		Adhesion by tenascin	0	0	0.3062	35.541	AD	sig	Inflammation	Monocyte
CPI-SC00B50273B	TNC_integrin_a4b1_complex	TNC		Adhesion by tenascin	0	0	0.3097	30.378	AD	sig	T cell	T cell
CPI-SC00B50273B	TNC_integrin_a4b1_complex	TNC		Adhesion by tenascin	0	0	0.3002	27.721	AD	sig	T cell	Monocyte
CPI-SC00B50273B	TNC_integrin_a4b1_complex	TNC		Adhesion by tenascin	0	0	0.2961	10.926	AD	sig	MHC 2	T cell
CPI-SC00B50273B	TNC_integrin_a4b1_complex	TNC		Adhesion by tenascin	0	0	0.2867	9.97	AD	sig	MHC 2	Monocyte
CPI-SC00B50273B	TNC_integrin_a4b1_complex	TNC		Adhesion by tenascin	0	0	0.301	18.011	AD	sig	Macrophage	T cell
CPI-SC00B50273B	TNC_integrin_a4b1_complex	TNC		Adhesion by tenascin	0	0	0.2916	16.436	AD	sig	Macrophage	Monocyte
CPI-SC00B50273B	TNC_integrin_a4b1_complex	TNC		Adhesion by tenascin	0	0	0.2985	14.331	AD	sig	Monocyte	T cell
CPI-SC00B50273B	TNC_integrin_a4b1_complex	TNC		Adhesion by tenascin	0	0	0.289	13.078	AD	sig	Monocyte	Monocyte
CPI-SC00B50273B	TNC_integrin_a4b1_complex	TNC		Adhesion by tenascin	0	0	0.2965	11.453	AD	sig	Proliferation	T cell
CPI-SC00B50273B	TNC_integrin_a4b1_complex	TNC		Adhesion by tenascin	0	0	0.287	10.451	AD	sig	Proliferation	Monocyte
CPI-SC00B50273B	TNC_integrin_a4b1_complex	TNC		Adhesion by tenascin	0	0	0.3051	23.842	AD	sig	Tau Microglia	T cell
CPI-SC00B50273B	TNC_integrin_a4b1_complex	TNC		Adhesion by tenascin	0	0	0.2957	21.757	AD	sig	Tau Microglia	Monocyte
CPI-SC0E029AB31	PLAUR_integrin_a4b1_complex	PLAUR		Signaling by Plasminogen Activator	0	0	0.3922	20.205	AD	sig	DAM1	T cell
CPI-SC0E029AB31	PLAUR_integrin_a4b1_complex	PLAUR		Signaling by Plasminogen Activator	0	0	0.3828	18.438	AD	sig	DAM1	Monocyte
CPI-SC0E029AB31	PLAUR_integrin_a4b1_complex	PLAUR		Signaling by Plasminogen Activator	0	0	0.3793	17.356	AD	sig	Homeostasis 1	T cell
CPI-SC0E029AB31	PLAUR_integrin_a4b1_complex	PLAUR		Signaling by Plasminogen Activator	0	0	0.3699	15.838	AD	sig	Homeostasis 1	Monocyte
CPI-SC0E029AB31	PLAUR_integrin_a4b1_complex	PLAUR		Signaling by Plasminogen Activator	0	0	0.3832	18.215	AD	sig	Homeostasis 2	T cell
CPI-SC0E029AB31	PLAUR_integrin_a4b1_complex	PLAUR		Signaling by Plasminogen Activator	0	0	0.3738	16.621	AD	sig	Homeostasis 2	Monocyte
CPI-SC0E029AB31	PLAUR_integrin_a4b1_complex	PLAUR		Signaling by Plasminogen Activator	0	0	0.4065	23.357	AD	sig	Inflammation	T cell
CPI-SC0E029AB31	PLAUR_integrin_a4b1_complex	PLAUR		Signaling by Plasminogen Activator	0	0	0.2077	6.565	AD	sig	Inflammation	Macrophage
CPI-SC0E029AB31	PLAUR_integrin_a4b1_complex	PLAUR		Signaling by Plasminogen Activator	0	0	0.3971	21.314	AD	sig	Inflammation	Monocyte
CPI-SC0E029AB31	PLAUR_integrin_a4b1_complex	PLAUR		Signaling by Plasminogen Activator	0	0	0.3006	0	AD	sig	T cell	T cell
CPI-SC0E029AB31	PLAUR_integrin_a4b1_complex	PLAUR		Signaling by Plasminogen Activator	0	0	0.2912	0	AD	sig	T cell	Monocyte
CPI-SC0E029AB31	PLAUR_integrin_a4b1_complex	PLAUR		Signaling by Plasminogen Activator	0	0	0.2269	6.625	AD	sig	MHC 1	DAM1
CPI-SC0E029AB31	PLAUR_integrin_a4b1_complex	PLAUR		Signaling by Plasminogen Activator	0	0	0.2042	3.912	AD	sig	MHC 1	Homeostasis 1
CPI-SC0E029AB31	PLAUR_integrin_a4b1_complex	PLAUR		Signaling by Plasminogen Activator	0	0	0.2237	6.537	AD	sig	MHC 1	Inflammation
CPI-SC0E029AB31	PLAUR_integrin_a4b1_complex	PLAUR		Signaling by Plasminogen Activator	0	0	0.4823	40.07	AD	sig	MHC 1	T cell
CPI-SC0E029AB31	PLAUR_integrin_a4b1_complex	PLAUR		Signaling by Plasminogen Activator	0	0	0.2153	5.991	AD	sig	MHC 1	MHC 1
CPI-SC0E029AB31	PLAUR_integrin_a4b1_complex	PLAUR		Signaling by Plasminogen Activator	0	0	0.2106	5.794	AD	sig	MHC 1	MHC 2
CPI-SC0E029AB31	PLAUR_integrin_a4b1_complex	PLAUR		Signaling by Plasminogen Activator	0	0	0.2834	11.263	AD	sig	MHC 1	Macrophage
CPI-SC0E029AB31	PLAUR_integrin_a4b1_complex	PLAUR		Signaling by Plasminogen Activator	0	0	0.4728	36.565	AD	sig	MHC 1	Monocyte
CPI-SC0E029AB31	PLAUR_integrin_a4b1_complex	PLAUR		Signaling by Plasminogen Activator	0	0	0.2276	8.446	AD	sig	MHC 1	Proliferation
CPI-SC0E029AB31	PLAUR_integrin_a4b1_complex	PLAUR		Signaling by Plasminogen Activator	0	0	0.3883	19.351	AD	sig	MHC 2	T cell
CPI-SC0E029AB31	PLAUR_integrin_a4b1_complex	PLAUR		Signaling by Plasminogen Activator	0	0	0.3789	17.659	AD	sig	MHC 2	Monocyte
CPI-SC0E029AB31	PLAUR_integrin_a4b1_complex	PLAUR		Signaling by Plasminogen Activator	0	0	0.3983	21.539	AD	sig	Macrophage	T cell
CPI-SC0E029AB31	PLAUR_integrin_a4b1_complex	PLAUR		Signaling by Plasminogen Activator	0	0	0.3888	19.655	AD	sig	Macrophage	Monocyte
CPI-SC0E029AB31	PLAUR_integrin_a4b1_complex	PLAUR		Signaling by Plasminogen Activator	0	0	0.2762	8.423	AD	sig	Monocyte	DAM1
CPI-SC0E029AB31	PLAUR_integrin_a4b1_complex	PLAUR		Signaling by Plasminogen Activator	0	0	0.2536	4.974	AD	sig	Monocyte	Homeostasis 1
CPI-SC0E029AB31	PLAUR_integrin_a4b1_complex	PLAUR		Signaling by Plasminogen Activator	0	0	0.273	8.312	AD	sig	Monocyte	Inflammation
CPI-SC0E029AB31	PLAUR_integrin_a4b1_complex	PLAUR		Signaling by Plasminogen Activator	0	0	0.5316	50.951	AD	sig	Monocyte	T cell
CPI-SC0E029AB31	PLAUR_integrin_a4b1_complex	PLAUR		Signaling by Plasminogen Activator	0	0	0.2647	7.618	AD	sig	Monocyte	MHC 1
CPI-SC0E029AB31	PLAUR_integrin_a4b1_complex	PLAUR		Signaling by Plasminogen Activator	0	0	0.2599	7.367	AD	sig	Monocyte	MHC 2
CPI-SC0E029AB31	PLAUR_integrin_a4b1_complex	PLAUR		Signaling by Plasminogen Activator	0	0	0.3327	14.321	AD	sig	Monocyte	Macrophage
CPI-SC0E029AB31	PLAUR_integrin_a4b1_complex	PLAUR		Signaling by Plasminogen Activator	0	0	0.5221	46.494	AD	sig	Monocyte	Monocyte
CPI-SC0E029AB31	PLAUR_integrin_a4b1_complex	PLAUR		Signaling by Plasminogen Activator	0	0	0.2769	10.74	AD	sig	Monocyte	Proliferation
CPI-SC0E029AB31	PLAUR_integrin_a4b1_complex	PLAUR		Signaling by Plasminogen Activator	0	0	0.3925	20.263	AD	sig	Proliferation	T cell
CPI-SC0E029AB31	PLAUR_integrin_a4b1_complex	PLAUR		Signaling by Plasminogen Activator	0	0	0.383	18.491	AD	sig	Proliferation	Monocyte
CPI-SC0E029AB31	PLAUR_integrin_a4b1_complex	PLAUR		Signaling by Plasminogen Activator	0	0	0.3533	11.61	AD	sig	Tau Microglia	T cell
CPI-SC0E029AB31	PLAUR_integrin_a4b1_complex	PLAUR		Signaling by Plasminogen Activator	0	0	0.3438	10.594	AD	sig	Tau Microglia	Monocyte
CPI-SC08F923F07	FN1_integrin_aVb1_complex	FN1		Adhesion by Fibronectin	0	0	0.214	16.373	AD	sig	DAM1	MHC 1
CPI-SC08F923F07	FN1_integrin_aVb1_complex	FN1		Adhesion by Fibronectin	0	0	0.2536	17.026	AD	sig	DAM1	MHC 2
CPI-SC08F923F07	FN1_integrin_aVb1_complex	FN1		Adhesion by Fibronectin	0	0	0.2666	20.117	AD	sig	DAM1	Proliferation
CPI-SC08F923F07	FN1_integrin_aVb1_complex	FN1		Adhesion by Fibronectin	0	0	0.2086	11.305	AD	sig	Homeostasis 1	MHC 1
CPI-SC08F923F07	FN1_integrin_aVb1_complex	FN1		Adhesion by Fibronectin	0.0003	0.0035	0.2481	11.756	AD	sig	Homeostasis 1	MHC 2
CPI-SC08F923F07	FN1_integrin_aVb1_complex	FN1		Adhesion by Fibronectin	0	0	0.2612	13.89	AD	sig	Homeostasis 1	Proliferation
CPI-SC08F923F07	FN1_integrin_aVb1_complex	FN1		Adhesion by Fibronectin	0	0	0.2135	15.883	AD	sig	Inflammation	MHC 1
CPI-SC08F923F07	FN1_integrin_aVb1_complex	FN1		Adhesion by Fibronectin	0	0	0.2531	16.516	AD	sig	Inflammation	MHC 2
CPI-SC08F923F07	FN1_integrin_aVb1_complex	FN1		Adhesion by Fibronectin	0	0	0.2661	19.515	AD	sig	Inflammation	Proliferation
CPI-SC08F923F07	FN1_integrin_aVb1_complex	FN1		Adhesion by Fibronectin	0	0	0.2117	14.219	AD	sig	T cell	MHC 1
CPI-SC08F923F07	FN1_integrin_aVb1_complex	FN1		Adhesion by Fibronectin	0.0003	0.0035	0.2513	14.786	AD	sig	T cell	MHC 2
CPI-SC08F923F07	FN1_integrin_aVb1_complex	FN1		Adhesion by Fibronectin	0	0	0.2643	17.47	AD	sig	T cell	Proliferation
CPI-SC08F923F07	FN1_integrin_aVb1_complex	FN1		Adhesion by Fibronectin	0	0	0.2045	7.55	AD	sig	MHC 1	MHC 1
CPI-SC08F923F07	FN1_integrin_aVb1_complex	FN1		Adhesion by Fibronectin	0.0012	0.0132	0.2441	7.851	AD	sig	MHC 1	MHC 2
CPI-SC08F923F07	FN1_integrin_aVb1_complex	FN1		Adhesion by Fibronectin	0	0	0.2572	9.277	AD	sig	MHC 1	Proliferation
CPI-SC08F923F07	FN1_integrin_aVb1_complex	FN1		Adhesion by Fibronectin	0	0	0.2106	13.157	AD	sig	Macrophage	MHC 1
CPI-SC08F923F07	FN1_integrin_aVb1_complex	FN1		Adhesion by Fibronectin	0.0003	0.0035	0.2501	13.681	AD	sig	Macrophage	MHC 2
CPI-SC08F923F07	FN1_integrin_aVb1_complex	FN1		Adhesion by Fibronectin	0	0	0.2632	16.166	AD	sig	Macrophage	Proliferation
CPI-SC08F923F07	FN1_integrin_aVb1_complex	FN1		Adhesion by Fibronectin	0	0	0.2186	20.673	AD	sig	Monocyte	MHC 1
CPI-SC08F923F07	FN1_integrin_aVb1_complex	FN1		Adhesion by Fibronectin	0	0	0.2582	21.497	AD	sig	Monocyte	MHC 2
CPI-SC08F923F07	FN1_integrin_aVb1_complex	FN1		Adhesion by Fibronectin	0	0	0.2713	25.4	AD	sig	Monocyte	Proliferation
CPI-SC08F923F07	FN1_integrin_aVb1_complex	FN1		Adhesion by Fibronectin	0	0	0.209	11.684	AD	sig	Proliferation	MHC 1
CPI-SC08F923F07	FN1_integrin_aVb1_complex	FN1		Adhesion by Fibronectin	0.0006	0.0068	0.2485	12.15	AD	sig	Proliferation	MHC 2
CPI-SC08F923F07	FN1_integrin_aVb1_complex	FN1		Adhesion by Fibronectin	0	0	0.2616	14.356	AD	sig	Proliferation	Proliferation
CPI-SC08F923F07	FN1_integrin_aVb1_complex	FN1		Adhesion by Fibronectin	0	0	0.2117	14.196	AD	sig	Tau Microglia	MHC 1
CPI-SC08F923F07	FN1_integrin_aVb1_complex	FN1		Adhesion by Fibronectin	0.0003	0.0035	0.2512	14.762	AD	sig	Tau Microglia	MHC 2
CPI-SC08F923F07	FN1_integrin_aVb1_complex	FN1		Adhesion by Fibronectin	0	0	0.2643	17.442	AD	sig	Tau Microglia	Proliferation
CPI-SC01D9AD677	L1CAM_integrin_aVb1_complex	L1CAM		Adhesion by L1CAM	0	0	0.2124	73.263	AD	sig	Homeostasis 1	MHC 1
CPI-SC01D9AD677	L1CAM_integrin_aVb1_complex	L1CAM		Adhesion by L1CAM	0	0	0.252	76.183	AD	sig	Homeostasis 1	MHC 2
CPI-SC01D9AD677	L1CAM_integrin_aVb1_complex	L1CAM		Adhesion by L1CAM	0	0	0.265	90.015	AD	sig	Homeostasis 1	Proliferation
CPI-SC01D9AD677	L1CAM_integrin_aVb1_complex	L1CAM		Adhesion by L1CAM	0	0	0.2058	42.957	AD	sig	MHC 1	MHC 1
CPI-SC01D9AD677	L1CAM_integrin_aVb1_complex	L1CAM		Adhesion by L1CAM	0.0003	0.0035	0.2454	44.67	AD	sig	MHC 1	MHC 2
CPI-SC01D9AD677	L1CAM_integrin_aVb1_complex	L1CAM		Adhesion by L1CAM	0	0	0.2584	52.78	AD	sig	MHC 1	Proliferation
CPI-SC01D9AD677	L1CAM_integrin_aVb1_complex	L1CAM		Adhesion by L1CAM	0	0	0.2063	45.262	AD	sig	MHC 2	MHC 1
CPI-SC01D9AD677	L1CAM_integrin_aVb1_complex	L1CAM		Adhesion by L1CAM	0.0003	0.0035	0.2459	47.066	AD	sig	MHC 2	MHC 2
CPI-SC01D9AD677	L1CAM_integrin_aVb1_complex	L1CAM		Adhesion by L1CAM	0	0	0.2589	55.611	AD	sig	MHC 2	Proliferation
CPI-SC01D9AD677	L1CAM_integrin_aVb1_complex	L1CAM		Adhesion by L1CAM	0	0	0.2054	41.093	AD	sig	Monocyte	MHC 1
CPI-SC01D9AD677	L1CAM_integrin_aVb1_complex	L1CAM		Adhesion by L1CAM	0.0003	0.0035	0.245	42.731	AD	sig	Monocyte	MHC 2
CPI-SC01D9AD677	L1CAM_integrin_aVb1_complex	L1CAM		Adhesion by L1CAM	0	0	0.258	50.49	AD	sig	Monocyte	Proliferation
CPI-SC01D9AD677	L1CAM_integrin_aVb1_complex	L1CAM		Adhesion by L1CAM	0	0	0.2074	50.074	AD	sig	Proliferation	MHC 1
CPI-SC01D9AD677	L1CAM_integrin_aVb1_complex	L1CAM		Adhesion by L1CAM	0.0003	0.0035	0.2469	52.07	AD	sig	Proliferation	MHC 2
CPI-SC01D9AD677	L1CAM_integrin_aVb1_complex	L1CAM		Adhesion by L1CAM	0	0	0.26	61.525	AD	sig	Proliferation	Proliferation
CPI-SC09B45FB39	FN1_integrin_aVb5_complex	FN1		Adhesion by Fibronectin	0	0	0.3345	22.349	AD	sig	DAM1	Inflammation
CPI-SC09B45FB39	FN1_integrin_aVb5_complex	FN1		Adhesion by Fibronectin	0	0	0.329	15.431	AD	sig	Homeostasis 1	Inflammation
CPI-SC09B45FB39	FN1_integrin_aVb5_complex	FN1		Adhesion by Fibronectin	0	0	0.334	21.68	AD	sig	Inflammation	Inflammation
CPI-SC09B45FB39	FN1_integrin_aVb5_complex	FN1		Adhesion by Fibronectin	0	0	0.3322	19.408	AD	sig	T cell	Inflammation
CPI-SC09B45FB39	FN1_integrin_aVb5_complex	FN1		Adhesion by Fibronectin	0	0	0.325	10.306	AD	sig	MHC 1	Inflammation
CPI-SC09B45FB39	FN1_integrin_aVb5_complex	FN1		Adhesion by Fibronectin	0	0	0.331	17.959	AD	sig	Macrophage	Inflammation
CPI-SC09B45FB39	FN1_integrin_aVb5_complex	FN1		Adhesion by Fibronectin	0	0	0.3391	28.217	AD	sig	Monocyte	Inflammation
CPI-SC09B45FB39	FN1_integrin_aVb5_complex	FN1		Adhesion by Fibronectin	0	0	0.3294	15.949	AD	sig	Proliferation	Inflammation
CPI-SC09B45FB39	FN1_integrin_aVb5_complex	FN1		Adhesion by Fibronectin	0	0	0.3321	19.377	AD	sig	Tau Microglia	Inflammation
CPI-SS0E9A581F8	ICAM1_ITGAL	ICAM1	ITGAL	Adhesion by ICAM	0	0	0.216	2.961	AD	sig	DAM1	DAM1
CPI-SS0E9A581F8	ICAM1_ITGAL	ICAM1	ITGAL	Adhesion by ICAM	0	0	0.6101	10.995	AD	sig	DAM1	T cell
CPI-SS0E9A581F8	ICAM1_ITGAL	ICAM1	ITGAL	Adhesion by ICAM	0	0	0.5102	8.958	AD	sig	DAM1	Monocyte
CPI-SS0E9A581F8	ICAM1_ITGAL	ICAM1	ITGAL	Adhesion by ICAM	0	0	0.2237	4.349	AD	sig	Homeostasis 1	DAM1
CPI-SS0E9A581F8	ICAM1_ITGAL	ICAM1	ITGAL	Adhesion by ICAM	0	0	0.6178	16.147	AD	sig	Homeostasis 1	T cell
CPI-SS0E9A581F8	ICAM1_ITGAL	ICAM1	ITGAL	Adhesion by ICAM	0	0	0.5179	13.156	AD	sig	Homeostasis 1	Monocyte
CPI-SS0E9A581F8	ICAM1_ITGAL	ICAM1	ITGAL	Adhesion by ICAM	0	0	0.2258	4.72	AD	sig	Homeostasis 2	DAM1
CPI-SS0E9A581F8	ICAM1_ITGAL	ICAM1	ITGAL	Adhesion by ICAM	0	0	0.6198	17.528	AD	sig	Homeostasis 2	T cell
CPI-SS0E9A581F8	ICAM1_ITGAL	ICAM1	ITGAL	Adhesion by ICAM	0	0	0.5199	14.281	AD	sig	Homeostasis 2	Monocyte
CPI-SS0E9A581F8	ICAM1_ITGAL	ICAM1	ITGAL	Adhesion by ICAM	0	0	0.2972	17.606	AD	sig	Inflammation	DAM1
CPI-SS0E9A581F8	ICAM1_ITGAL	ICAM1	ITGAL	Adhesion by ICAM	0	0	0.2631	13.473	AD	sig	Inflammation	Homeostasis 1
CPI-SS0E9A581F8	ICAM1_ITGAL	ICAM1	ITGAL	Adhesion by ICAM	0	0	0.2862	16.28	AD	sig	Inflammation	Homeostasis 2
CPI-SS0E9A581F8	ICAM1_ITGAL	ICAM1	ITGAL	Adhesion by ICAM	0	0	0.239	10.556	AD	sig	Inflammation	Inflammation
CPI-SS0E9A581F8	ICAM1_ITGAL	ICAM1	ITGAL	Adhesion by ICAM	0	0	0.6913	65.373	AD	sig	Inflammation	T cell
CPI-SS0E9A581F8	ICAM1_ITGAL	ICAM1	ITGAL	Adhesion by ICAM	0.0024	0.0254	0.2049	6.416	AD	sig	Inflammation	MHC 1
CPI-SS0E9A581F8	ICAM1_ITGAL	ICAM1	ITGAL	Adhesion by ICAM	0	0	0.2741	14.803	AD	sig	Inflammation	MHC 2
CPI-SS0E9A581F8	ICAM1_ITGAL	ICAM1	ITGAL	Adhesion by ICAM	0	0	0.5914	53.264	AD	sig	Inflammation	Monocyte
CPI-SS0E9A581F8	ICAM1_ITGAL	ICAM1	ITGAL	Adhesion by ICAM	0	0	0.2464	11.454	AD	sig	Inflammation	Proliferation
CPI-SS0E9A581F8	ICAM1_ITGAL	ICAM1	ITGAL	Adhesion by ICAM	0	0	0.2492	11.793	AD	sig	Inflammation	Tau Microglia
CPI-SS0E9A581F8	ICAM1_ITGAL	ICAM1	ITGAL	Adhesion by ICAM	0	0	0.5937	0	AD	sig	T cell	T cell
CPI-SS0E9A581F8	ICAM1_ITGAL	ICAM1	ITGAL	Adhesion by ICAM	0	0	0.4938	0	AD	sig	T cell	Monocyte
CPI-SS0E9A581F8	ICAM1_ITGAL	ICAM1	ITGAL	Adhesion by ICAM	0	0	0.2246	4.515	AD	sig	MHC 1	DAM1
CPI-SS0E9A581F8	ICAM1_ITGAL	ICAM1	ITGAL	Adhesion by ICAM	0	0	0.6187	16.764	AD	sig	MHC 1	T cell
CPI-SS0E9A581F8	ICAM1_ITGAL	ICAM1	ITGAL	Adhesion by ICAM	0	0	0.5188	13.659	AD	sig	MHC 1	Monocyte
CPI-SS0E9A581F8	ICAM1_ITGAL	ICAM1	ITGAL	Adhesion by ICAM	0	0	0.2392	7.14	AD	sig	MHC 2	DAM1
CPI-SS0E9A581F8	ICAM1_ITGAL	ICAM1	ITGAL	Adhesion by ICAM	0	0	0.6333	26.512	AD	sig	MHC 2	T cell
CPI-SS0E9A581F8	ICAM1_ITGAL	ICAM1	ITGAL	Adhesion by ICAM	0	0	0.5334	21.602	AD	sig	MHC 2	Monocyte
CPI-SS0E9A581F8	ICAM1_ITGAL	ICAM1	ITGAL	Adhesion by ICAM	0	0	0.2318	5.806	AD	sig	Macrophage	DAM1
CPI-SS0E9A581F8	ICAM1_ITGAL	ICAM1	ITGAL	Adhesion by ICAM	0.0032	0.0333	0.2209	5.369	AD	sig	Macrophage	Homeostasis 2
CPI-SS0E9A581F8	ICAM1_ITGAL	ICAM1	ITGAL	Adhesion by ICAM	0	0	0.6259	21.56	AD	sig	Macrophage	T cell
CPI-SS0E9A581F8	ICAM1_ITGAL	ICAM1	ITGAL	Adhesion by ICAM	0	0	0.526	17.567	AD	sig	Macrophage	Monocyte
CPI-SS0E9A581F8	ICAM1_ITGAL	ICAM1	ITGAL	Adhesion by ICAM	0	0	0.2523	9.5	AD	sig	Monocyte	DAM1
CPI-SS0E9A581F8	ICAM1_ITGAL	ICAM1	ITGAL	Adhesion by ICAM	0	0	0.2182	7.27	AD	sig	Monocyte	Homeostasis 1
CPI-SS0E9A581F8	ICAM1_ITGAL	ICAM1	ITGAL	Adhesion by ICAM	0	0	0.2413	8.785	AD	sig	Monocyte	Homeostasis 2
CPI-SS0E9A581F8	ICAM1_ITGAL	ICAM1	ITGAL	Adhesion by ICAM	0	0	0.6463	35.276	AD	sig	Monocyte	T cell
CPI-SS0E9A581F8	ICAM1_ITGAL	ICAM1	ITGAL	Adhesion by ICAM	0	0	0.5464	28.742	AD	sig	Monocyte	Monocyte
CPI-SS0E9A581F8	ICAM1_ITGAL	ICAM1	ITGAL	Adhesion by ICAM	0	0	0.218	3.32	AD	sig	Proliferation	DAM1
CPI-SS0E9A581F8	ICAM1_ITGAL	ICAM1	ITGAL	Adhesion by ICAM	0	0	0.6121	12.327	AD	sig	Proliferation	T cell
CPI-SS0E9A581F8	ICAM1_ITGAL	ICAM1	ITGAL	Adhesion by ICAM	0	0	0.5122	10.044	AD	sig	Proliferation	Monocyte
CPI-SS0E9A581F8	ICAM1_ITGAL	ICAM1	ITGAL	Adhesion by ICAM	0	0	0.2053	1.022	AD	sig	Tau Microglia	DAM1
CPI-SS0E9A581F8	ICAM1_ITGAL	ICAM1	ITGAL	Adhesion by ICAM	0	0	0.5993	3.793	AD	sig	Tau Microglia	T cell
CPI-SS0E9A581F8	ICAM1_ITGAL	ICAM1	ITGAL	Adhesion by ICAM	0	0	0.4994	3.091	AD	sig	Tau Microglia	Monocyte
CPI-SC00035437A	ICAM1_integrin_aLb2_complex	ICAM1		Adhesion by ICAM	0	0	0.216	5.335	AD	sig	DAM1	DAM1
CPI-SC00035437A	ICAM1_integrin_aLb2_complex	ICAM1		Adhesion by ICAM	0	0	0.253	9.577	AD	sig	DAM1	T cell
CPI-SC00035437A	ICAM1_integrin_aLb2_complex	ICAM1		Adhesion by ICAM	0	0	0.3839	10.995	AD	sig	DAM1	Monocyte
CPI-SC00035437A	ICAM1_integrin_aLb2_complex	ICAM1		Adhesion by ICAM	0	0	0.2237	7.835	AD	sig	Homeostasis 1	DAM1
CPI-SC00035437A	ICAM1_integrin_aLb2_complex	ICAM1		Adhesion by ICAM	0	0	0.2607	14.065	AD	sig	Homeostasis 1	T cell
CPI-SC00035437A	ICAM1_integrin_aLb2_complex	ICAM1		Adhesion by ICAM	0	0	0.3916	16.147	AD	sig	Homeostasis 1	Monocyte
CPI-SC00035437A	ICAM1_integrin_aLb2_complex	ICAM1		Adhesion by ICAM	0	0	0.2258	8.505	AD	sig	Homeostasis 2	DAM1
CPI-SC00035437A	ICAM1_integrin_aLb2_complex	ICAM1		Adhesion by ICAM	0	0	0.2628	15.268	AD	sig	Homeostasis 2	T cell
CPI-SC00035437A	ICAM1_integrin_aLb2_complex	ICAM1		Adhesion by ICAM	0	0	0.3937	17.528	AD	sig	Homeostasis 2	Monocyte
CPI-SC00035437A	ICAM1_integrin_aLb2_complex	ICAM1		Adhesion by ICAM	0	0	0.2972	31.721	AD	sig	Inflammation	DAM1
CPI-SC00035437A	ICAM1_integrin_aLb2_complex	ICAM1		Adhesion by ICAM	0	0	0.2631	30.764	AD	sig	Inflammation	Homeostasis 1
CPI-SC00035437A	ICAM1_integrin_aLb2_complex	ICAM1		Adhesion by ICAM	0	0	0.2862	31.877	AD	sig	Inflammation	Homeostasis 2
CPI-SC00035437A	ICAM1_integrin_aLb2_complex	ICAM1		Adhesion by ICAM	0	0	0.239	24.52	AD	sig	Inflammation	Inflammation
CPI-SC00035437A	ICAM1_integrin_aLb2_complex	ICAM1		Adhesion by ICAM	0	0	0.3342	56.944	AD	sig	Inflammation	T cell
CPI-SC00035437A	ICAM1_integrin_aLb2_complex	ICAM1		Adhesion by ICAM	0.0024	0.0254	0.2049	21.17	AD	sig	Inflammation	MHC 1
CPI-SC00035437A	ICAM1_integrin_aLb2_complex	ICAM1		Adhesion by ICAM	0	0	0.2741	38.006	AD	sig	Inflammation	MHC 2
CPI-SC00035437A	ICAM1_integrin_aLb2_complex	ICAM1		Adhesion by ICAM	0	0	0.4651	65.373	AD	sig	Inflammation	Monocyte
CPI-SC00035437A	ICAM1_integrin_aLb2_complex	ICAM1		Adhesion by ICAM	0	0	0.2464	27.811	AD	sig	Inflammation	Proliferation
CPI-SC00035437A	ICAM1_integrin_aLb2_complex	ICAM1		Adhesion by ICAM	0	0	0.2492	24.332	AD	sig	Inflammation	Tau Microglia
CPI-SC00035437A	ICAM1_integrin_aLb2_complex	ICAM1		Adhesion by ICAM	0	0	0.2366	0	AD	sig	T cell	T cell
CPI-SC00035437A	ICAM1_integrin_aLb2_complex	ICAM1		Adhesion by ICAM	0	0	0.3675	0	AD	sig	T cell	Monocyte
CPI-SC00035437A	ICAM1_integrin_aLb2_complex	ICAM1		Adhesion by ICAM	0	0	0.2246	8.134	AD	sig	MHC 1	DAM1
CPI-SC00035437A	ICAM1_integrin_aLb2_complex	ICAM1		Adhesion by ICAM	0	0	0.2617	14.602	AD	sig	MHC 1	T cell
CPI-SC00035437A	ICAM1_integrin_aLb2_complex	ICAM1		Adhesion by ICAM	0	0	0.3925	16.764	AD	sig	MHC 1	Monocyte
CPI-SC00035437A	ICAM1_integrin_aLb2_complex	ICAM1		Adhesion by ICAM	0	0	0.2392	12.865	AD	sig	MHC 2	DAM1
CPI-SC00035437A	ICAM1_integrin_aLb2_complex	ICAM1		Adhesion by ICAM	0	0	0.2762	23.094	AD	sig	MHC 2	T cell
CPI-SC00035437A	ICAM1_integrin_aLb2_complex	ICAM1		Adhesion by ICAM	0	0	0.4071	26.512	AD	sig	MHC 2	Monocyte
CPI-SC00035437A	ICAM1_integrin_aLb2_complex	ICAM1		Adhesion by ICAM	0	0	0.2318	10.462	AD	sig	Macrophage	DAM1
CPI-SC00035437A	ICAM1_integrin_aLb2_complex	ICAM1		Adhesion by ICAM	0.0032	0.0333	0.2209	10.513	AD	sig	Macrophage	Homeostasis 2
CPI-SC00035437A	ICAM1_integrin_aLb2_complex	ICAM1		Adhesion by ICAM	0	0	0.2688	18.78	AD	sig	Macrophage	T cell
CPI-SC00035437A	ICAM1_integrin_aLb2_complex	ICAM1		Adhesion by ICAM	0	0	0.3997	21.56	AD	sig	Macrophage	Monocyte
CPI-SC00035437A	ICAM1_integrin_aLb2_complex	ICAM1		Adhesion by ICAM	0	0	0.2523	17.117	AD	sig	Monocyte	DAM1
CPI-SC00035437A	ICAM1_integrin_aLb2_complex	ICAM1		Adhesion by ICAM	0	0	0.2182	16.601	AD	sig	Monocyte	Homeostasis 1
CPI-SC00035437A	ICAM1_integrin_aLb2_complex	ICAM1		Adhesion by ICAM	0	0	0.2413	17.201	AD	sig	Monocyte	Homeostasis 2
CPI-SC00035437A	ICAM1_integrin_aLb2_complex	ICAM1		Adhesion by ICAM	0	0	0.2893	30.727	AD	sig	Monocyte	T cell
CPI-SC00035437A	ICAM1_integrin_aLb2_complex	ICAM1		Adhesion by ICAM	0	0	0.4202	35.276	AD	sig	Monocyte	Monocyte
CPI-SC00035437A	ICAM1_integrin_aLb2_complex	ICAM1		Adhesion by ICAM	0	0	0.218	5.981	AD	sig	Proliferation	DAM1
CPI-SC00035437A	ICAM1_integrin_aLb2_complex	ICAM1		Adhesion by ICAM	0	0	0.255	10.737	AD	sig	Proliferation	T cell
CPI-SC00035437A	ICAM1_integrin_aLb2_complex	ICAM1		Adhesion by ICAM	0	0	0.3859	12.327	AD	sig	Proliferation	Monocyte
CPI-SC00035437A	ICAM1_integrin_aLb2_complex	ICAM1		Adhesion by ICAM	0	0	0.2053	1.841	AD	sig	Tau Microglia	DAM1
CPI-SC00035437A	ICAM1_integrin_aLb2_complex	ICAM1		Adhesion by ICAM	0	0	0.2423	3.304	AD	sig	Tau Microglia	T cell
CPI-SC00035437A	ICAM1_integrin_aLb2_complex	ICAM1		Adhesion by ICAM	0	0	0.3732	3.793	AD	sig	Tau Microglia	Monocyte
CPI-SC0943ECD6E	ICAM2_integrin_aLb2_complex	ICAM2		Adhesion by ICAM	0	0	0.2288	11.023	AD	sig	DAM1	T cell
CPI-SC0943ECD6E	ICAM2_integrin_aLb2_complex	ICAM2		Adhesion by ICAM	0	0	0.3597	12.654	AD	sig	DAM1	Monocyte
CPI-SC0943ECD6E	ICAM2_integrin_aLb2_complex	ICAM2		Adhesion by ICAM	0	0	0.2291	11.488	AD	sig	Homeostasis 1	T cell
CPI-SC0943ECD6E	ICAM2_integrin_aLb2_complex	ICAM2		Adhesion by ICAM	0	0	0.36	13.188	AD	sig	Homeostasis 1	Monocyte
CPI-SC0943ECD6E	ICAM2_integrin_aLb2_complex	ICAM2		Adhesion by ICAM	0	0	0.231	13.893	AD	sig	Homeostasis 2	T cell
CPI-SC0943ECD6E	ICAM2_integrin_aLb2_complex	ICAM2		Adhesion by ICAM	0	0	0.3618	15.95	AD	sig	Homeostasis 2	Monocyte
CPI-SC0943ECD6E	ICAM2_integrin_aLb2_complex	ICAM2		Adhesion by ICAM	0	0	0.2379	40.188	AD	sig	T cell	DAM1
CPI-SC0943ECD6E	ICAM2_integrin_aLb2_complex	ICAM2		Adhesion by ICAM	0	0	0.2039	38.976	AD	sig	T cell	Homeostasis 1
CPI-SC0943ECD6E	ICAM2_integrin_aLb2_complex	ICAM2		Adhesion by ICAM	0	0	0.227	40.386	AD	sig	T cell	Homeostasis 2
CPI-SC0943ECD6E	ICAM2_integrin_aLb2_complex	ICAM2		Adhesion by ICAM	0	0	0.275	72.144	AD	sig	T cell	T cell
CPI-SC0943ECD6E	ICAM2_integrin_aLb2_complex	ICAM2		Adhesion by ICAM	0	0	0.4058	82.823	AD	sig	T cell	Monocyte
CPI-SC0943ECD6E	ICAM2_integrin_aLb2_complex	ICAM2		Adhesion by ICAM	0	0	0.2306	13.401	AD	sig	MHC 1	T cell
CPI-SC0943ECD6E	ICAM2_integrin_aLb2_complex	ICAM2		Adhesion by ICAM	0	0	0.3615	15.385	AD	sig	MHC 1	Monocyte
CPI-SC0943ECD6E	ICAM2_integrin_aLb2_complex	ICAM2		Adhesion by ICAM	0	0	0.2024	14.012	AD	sig	MHC 2	DAM1
CPI-SC0943ECD6E	ICAM2_integrin_aLb2_complex	ICAM2		Adhesion by ICAM	0	0	0.2395	25.153	AD	sig	MHC 2	T cell
CPI-SC0943ECD6E	ICAM2_integrin_aLb2_complex	ICAM2		Adhesion by ICAM	0	0	0.3703	28.877	AD	sig	MHC 2	Monocyte
CPI-SC0943ECD6E	ICAM2_integrin_aLb2_complex	ICAM2		Adhesion by ICAM	0	0	0.2291	11.377	AD	sig	Macrophage	T cell
CPI-SC0943ECD6E	ICAM2_integrin_aLb2_complex	ICAM2		Adhesion by ICAM	0	0	0.3599	13.061	AD	sig	Macrophage	Monocyte
CPI-SC0943ECD6E	ICAM2_integrin_aLb2_complex	ICAM2		Adhesion by ICAM	0	0	0.2493	48.523	AD	sig	Monocyte	DAM1
CPI-SC0943ECD6E	ICAM2_integrin_aLb2_complex	ICAM2		Adhesion by ICAM	0	0	0.2152	47.06	AD	sig	Monocyte	Homeostasis 1
CPI-SC0943ECD6E	ICAM2_integrin_aLb2_complex	ICAM2		Adhesion by ICAM	0	0	0.2383	48.762	AD	sig	Monocyte	Homeostasis 2
CPI-SC0943ECD6E	ICAM2_integrin_aLb2_complex	ICAM2		Adhesion by ICAM	0	0	0.2863	87.106	AD	sig	Monocyte	T cell
CPI-SC0943ECD6E	ICAM2_integrin_aLb2_complex	ICAM2		Adhesion by ICAM	0.001	0.0111	0.2261	58.137	AD	sig	Monocyte	MHC 2
CPI-SC0943ECD6E	ICAM2_integrin_aLb2_complex	ICAM2		Adhesion by ICAM	0	0	0.4171	100	AD	sig	Monocyte	Monocyte
CPI-SC0943ECD6E	ICAM2_integrin_aLb2_complex	ICAM2		Adhesion by ICAM	0	0	0.2013	37.22	AD	sig	Monocyte	Tau Microglia
CPI-SC0943ECD6E	ICAM2_integrin_aLb2_complex	ICAM2		Adhesion by ICAM	0	0	0.2269	8.476	AD	sig	Proliferation	T cell
CPI-SC0943ECD6E	ICAM2_integrin_aLb2_complex	ICAM2		Adhesion by ICAM	0	0	0.3577	9.731	AD	sig	Proliferation	Monocyte
CPI-SS09C4FCB90	ICAM1_SPN	ICAM1	SPN	Adhesion by ICAM	0	0	0.2169	65.373	AD	sig	Inflammation	Monocyte
CPI-SC0EB9B5460	L1CAM_integrin_a9b1_complex	L1CAM		Adhesion by L1CAM	0	0	0.2124	77.533	AD	sig	Homeostasis 1	MHC 1
CPI-SC0EB9B5460	L1CAM_integrin_a9b1_complex	L1CAM		Adhesion by L1CAM	0	0	0.252	68.585	AD	sig	Homeostasis 1	MHC 2
CPI-SC0EB9B5460	L1CAM_integrin_a9b1_complex	L1CAM		Adhesion by L1CAM	0	0	0.265	83.536	AD	sig	Homeostasis 1	Proliferation
CPI-SC0EB9B5460	L1CAM_integrin_a9b1_complex	L1CAM		Adhesion by L1CAM	0	0	0.2058	45.461	AD	sig	MHC 1	MHC 1
CPI-SC0EB9B5460	L1CAM_integrin_a9b1_complex	L1CAM		Adhesion by L1CAM	0.0003	0.0035	0.2454	40.215	AD	sig	MHC 1	MHC 2
CPI-SC0EB9B5460	L1CAM_integrin_a9b1_complex	L1CAM		Adhesion by L1CAM	0	0	0.2584	48.981	AD	sig	MHC 1	Proliferation
CPI-SC0EB9B5460	L1CAM_integrin_a9b1_complex	L1CAM		Adhesion by L1CAM	0	0	0.2063	47.9	AD	sig	MHC 2	MHC 1
CPI-SC0EB9B5460	L1CAM_integrin_a9b1_complex	L1CAM		Adhesion by L1CAM	0.0003	0.0035	0.2459	42.372	AD	sig	MHC 2	MHC 2
CPI-SC0EB9B5460	L1CAM_integrin_a9b1_complex	L1CAM		Adhesion by L1CAM	0	0	0.2589	51.608	AD	sig	MHC 2	Proliferation
CPI-SC0EB9B5460	L1CAM_integrin_a9b1_complex	L1CAM		Adhesion by L1CAM	0	0	0.2054	43.488	AD	sig	Monocyte	MHC 1
CPI-SC0EB9B5460	L1CAM_integrin_a9b1_complex	L1CAM		Adhesion by L1CAM	0.0003	0.0035	0.245	38.47	AD	sig	Monocyte	MHC 2
CPI-SC0EB9B5460	L1CAM_integrin_a9b1_complex	L1CAM		Adhesion by L1CAM	0	0	0.258	46.856	AD	sig	Monocyte	Proliferation
CPI-SC0EB9B5460	L1CAM_integrin_a9b1_complex	L1CAM		Adhesion by L1CAM	0	0	0.2074	52.993	AD	sig	Proliferation	MHC 1
CPI-SC0EB9B5460	L1CAM_integrin_a9b1_complex	L1CAM		Adhesion by L1CAM	0.0003	0.0035	0.2469	46.878	AD	sig	Proliferation	MHC 2
CPI-SC0EB9B5460	L1CAM_integrin_a9b1_complex	L1CAM		Adhesion by L1CAM	0	0	0.26	57.096	AD	sig	Proliferation	Proliferation
CPI-SC069FF84F5	SPP1_integrin_a9b1_complex	SPP1		Adhesion by Osteopontin	0	0	0.989	23.62	AD	sig	DAM1	DAM1
CPI-SC069FF84F5	SPP1_integrin_a9b1_complex	SPP1		Adhesion by Osteopontin	0	0	1.0054	30.836	AD	sig	DAM1	Homeostasis 1
CPI-SC069FF84F5	SPP1_integrin_a9b1_complex	SPP1		Adhesion by Osteopontin	0	0	1.0134	26.503	AD	sig	DAM1	Homeostasis 2
CPI-SC069FF84F5	SPP1_integrin_a9b1_complex	SPP1		Adhesion by Osteopontin	0	0	1.0012	29.549	AD	sig	DAM1	Inflammation
CPI-SC069FF84F5	SPP1_integrin_a9b1_complex	SPP1		Adhesion by Osteopontin	0	0	1.0292	31.747	AD	sig	DAM1	MHC 1
CPI-SC069FF84F5	SPP1_integrin_a9b1_complex	SPP1		Adhesion by Osteopontin	0	0	1.0688	28.084	AD	sig	DAM1	MHC 2
CPI-SC069FF84F5	SPP1_integrin_a9b1_complex	SPP1		Adhesion by Osteopontin	0	0	0.9997	26.066	AD	sig	DAM1	Macrophage
CPI-SC069FF84F5	SPP1_integrin_a9b1_complex	SPP1		Adhesion by Osteopontin	0	0	1.0818	34.205	AD	sig	DAM1	Proliferation
CPI-SC069FF84F5	SPP1_integrin_a9b1_complex	SPP1		Adhesion by Osteopontin	0	0	1.2782	33.536	AD	sig	Homeostasis 1	DAM1
CPI-SC069FF84F5	SPP1_integrin_a9b1_complex	SPP1		Adhesion by Osteopontin	0	0	1.2946	43.781	AD	sig	Homeostasis 1	Homeostasis 1
CPI-SC069FF84F5	SPP1_integrin_a9b1_complex	SPP1		Adhesion by Osteopontin	0	0	1.3025	37.629	AD	sig	Homeostasis 1	Homeostasis 2
CPI-SC069FF84F5	SPP1_integrin_a9b1_complex	SPP1		Adhesion by Osteopontin	0	0	1.2904	41.954	AD	sig	Homeostasis 1	Inflammation
CPI-SC069FF84F5	SPP1_integrin_a9b1_complex	SPP1		Adhesion by Osteopontin	0	0	1.1467	14.147	AD	sig	Homeostasis 1	T cell
CPI-SC069FF84F5	SPP1_integrin_a9b1_complex	SPP1		Adhesion by Osteopontin	0	0	1.3184	45.075	AD	sig	Homeostasis 1	MHC 1
CPI-SC069FF84F5	SPP1_integrin_a9b1_complex	SPP1		Adhesion by Osteopontin	0	0	1.358	39.874	AD	sig	Homeostasis 1	MHC 2
CPI-SC069FF84F5	SPP1_integrin_a9b1_complex	SPP1		Adhesion by Osteopontin	0	0	1.2888	37.008	AD	sig	Homeostasis 1	Macrophage
CPI-SC069FF84F5	SPP1_integrin_a9b1_complex	SPP1		Adhesion by Osteopontin	0	0	1.222	27.995	AD	sig	Homeostasis 1	Monocyte
CPI-SC069FF84F5	SPP1_integrin_a9b1_complex	SPP1		Adhesion by Osteopontin	0	0	1.371	48.565	AD	sig	Homeostasis 1	Proliferation
CPI-SC069FF84F5	SPP1_integrin_a9b1_complex	SPP1		Adhesion by Osteopontin	0	0	1.2502	35.223	AD	sig	Homeostasis 1	Tau Microglia
CPI-SC069FF84F5	SPP1_integrin_a9b1_complex	SPP1		Adhesion by Osteopontin	0	0	1.2533	32.682	AD	sig	Homeostasis 2	DAM1
CPI-SC069FF84F5	SPP1_integrin_a9b1_complex	SPP1		Adhesion by Osteopontin	0	0	1.2697	42.666	AD	sig	Homeostasis 2	Homeostasis 1
CPI-SC069FF84F5	SPP1_integrin_a9b1_complex	SPP1		Adhesion by Osteopontin	0	0	1.2776	36.671	AD	sig	Homeostasis 2	Homeostasis 2
CPI-SC069FF84F5	SPP1_integrin_a9b1_complex	SPP1		Adhesion by Osteopontin	0	0	1.2655	40.886	AD	sig	Homeostasis 2	Inflammation
CPI-SC069FF84F5	SPP1_integrin_a9b1_complex	SPP1		Adhesion by Osteopontin	0	0	1.1218	13.787	AD	sig	Homeostasis 2	T cell
CPI-SC069FF84F5	SPP1_integrin_a9b1_complex	SPP1		Adhesion by Osteopontin	0	0	1.2935	43.927	AD	sig	Homeostasis 2	MHC 1
CPI-SC069FF84F5	SPP1_integrin_a9b1_complex	SPP1		Adhesion by Osteopontin	0	0	1.3331	38.858	AD	sig	Homeostasis 2	MHC 2
CPI-SC069FF84F5	SPP1_integrin_a9b1_complex	SPP1		Adhesion by Osteopontin	0	0	1.2639	36.066	AD	sig	Homeostasis 2	Macrophage
CPI-SC069FF84F5	SPP1_integrin_a9b1_complex	SPP1		Adhesion by Osteopontin	0	0	1.1971	27.282	AD	sig	Homeostasis 2	Monocyte
CPI-SC069FF84F5	SPP1_integrin_a9b1_complex	SPP1		Adhesion by Osteopontin	0	0	1.3461	47.328	AD	sig	Homeostasis 2	Proliferation
CPI-SC069FF84F5	SPP1_integrin_a9b1_complex	SPP1		Adhesion by Osteopontin	0	0	1.2253	34.326	AD	sig	Homeostasis 2	Tau Microglia
CPI-SC069FF84F5	SPP1_integrin_a9b1_complex	SPP1		Adhesion by Osteopontin	0	0	1.6958	47.856	AD	sig	Inflammation	DAM1
CPI-SC069FF84F5	SPP1_integrin_a9b1_complex	SPP1		Adhesion by Osteopontin	0	0	1.7122	62.476	AD	sig	Inflammation	Homeostasis 1
CPI-SC069FF84F5	SPP1_integrin_a9b1_complex	SPP1		Adhesion by Osteopontin	0	0	1.7202	53.697	AD	sig	Inflammation	Homeostasis 2
CPI-SC069FF84F5	SPP1_integrin_a9b1_complex	SPP1		Adhesion by Osteopontin	0	0	1.708	59.869	AD	sig	Inflammation	Inflammation
CPI-SC069FF84F5	SPP1_integrin_a9b1_complex	SPP1		Adhesion by Osteopontin	0	0	1.5643	20.188	AD	sig	Inflammation	T cell
CPI-SC069FF84F5	SPP1_integrin_a9b1_complex	SPP1		Adhesion by Osteopontin	0	0	1.736	64.322	AD	sig	Inflammation	MHC 1
CPI-SC069FF84F5	SPP1_integrin_a9b1_complex	SPP1		Adhesion by Osteopontin	0	0	1.7756	56.9	AD	sig	Inflammation	MHC 2
CPI-SC069FF84F5	SPP1_integrin_a9b1_complex	SPP1		Adhesion by Osteopontin	0	0	1.7065	52.811	AD	sig	Inflammation	Macrophage
CPI-SC069FF84F5	SPP1_integrin_a9b1_complex	SPP1		Adhesion by Osteopontin	0	0	1.6396	39.949	AD	sig	Inflammation	Monocyte
CPI-SC069FF84F5	SPP1_integrin_a9b1_complex	SPP1		Adhesion by Osteopontin	0	0	1.7886	69.303	AD	sig	Inflammation	Proliferation
CPI-SC069FF84F5	SPP1_integrin_a9b1_complex	SPP1		Adhesion by Osteopontin	0	0	1.6679	50.264	AD	sig	Inflammation	Tau Microglia
CPI-SC069FF84F5	SPP1_integrin_a9b1_complex	SPP1		Adhesion by Osteopontin	0	0	1.0024	24.081	AD	sig	MHC 1	DAM1
CPI-SC069FF84F5	SPP1_integrin_a9b1_complex	SPP1		Adhesion by Osteopontin	0	0	1.0188	31.437	AD	sig	MHC 1	Homeostasis 1
CPI-SC069FF84F5	SPP1_integrin_a9b1_complex	SPP1		Adhesion by Osteopontin	0	0	1.0268	27.02	AD	sig	MHC 1	Homeostasis 2
CPI-SC069FF84F5	SPP1_integrin_a9b1_complex	SPP1		Adhesion by Osteopontin	0	0	1.0146	30.126	AD	sig	MHC 1	Inflammation
CPI-SC069FF84F5	SPP1_integrin_a9b1_complex	SPP1		Adhesion by Osteopontin	0	0	1.0426	32.367	AD	sig	MHC 1	MHC 1
CPI-SC069FF84F5	SPP1_integrin_a9b1_complex	SPP1		Adhesion by Osteopontin	0	0	1.0822	28.631	AD	sig	MHC 1	MHC 2
CPI-SC069FF84F5	SPP1_integrin_a9b1_complex	SPP1		Adhesion by Osteopontin	0	0	1.0131	26.574	AD	sig	MHC 1	Macrophage
CPI-SC069FF84F5	SPP1_integrin_a9b1_complex	SPP1		Adhesion by Osteopontin	0	0	1.0953	34.873	AD	sig	MHC 1	Proliferation
CPI-SC069FF84F5	SPP1_integrin_a9b1_complex	SPP1		Adhesion by Osteopontin	0.0048	0.0488	0.9745	25.292	AD	sig	MHC 1	Tau Microglia
CPI-SC069FF84F5	SPP1_integrin_a9b1_complex	SPP1		Adhesion by Osteopontin	0	0	1.5521	42.93	AD	sig	MHC 2	DAM1
CPI-SC069FF84F5	SPP1_integrin_a9b1_complex	SPP1		Adhesion by Osteopontin	0	0	1.5685	56.044	AD	sig	MHC 2	Homeostasis 1
CPI-SC069FF84F5	SPP1_integrin_a9b1_complex	SPP1		Adhesion by Osteopontin	0	0	1.5765	48.169	AD	sig	MHC 2	Homeostasis 2
CPI-SC069FF84F5	SPP1_integrin_a9b1_complex	SPP1		Adhesion by Osteopontin	0	0	1.5643	53.706	AD	sig	MHC 2	Inflammation
CPI-SC069FF84F5	SPP1_integrin_a9b1_complex	SPP1		Adhesion by Osteopontin	0	0	1.4206	18.11	AD	sig	MHC 2	T cell
CPI-SC069FF84F5	SPP1_integrin_a9b1_complex	SPP1		Adhesion by Osteopontin	0	0	1.5923	57.701	AD	sig	MHC 2	MHC 1
CPI-SC069FF84F5	SPP1_integrin_a9b1_complex	SPP1		Adhesion by Osteopontin	0	0	1.6319	51.042	AD	sig	MHC 2	MHC 2
CPI-SC069FF84F5	SPP1_integrin_a9b1_complex	SPP1		Adhesion by Osteopontin	0	0	1.5628	47.374	AD	sig	MHC 2	Macrophage
CPI-SC069FF84F5	SPP1_integrin_a9b1_complex	SPP1		Adhesion by Osteopontin	0	0	1.4959	35.836	AD	sig	MHC 2	Monocyte
CPI-SC069FF84F5	SPP1_integrin_a9b1_complex	SPP1		Adhesion by Osteopontin	0	0	1.645	62.168	AD	sig	MHC 2	Proliferation
CPI-SC069FF84F5	SPP1_integrin_a9b1_complex	SPP1		Adhesion by Osteopontin	0	0	1.5242	45.089	AD	sig	MHC 2	Tau Microglia
CPI-SC069FF84F5	SPP1_integrin_a9b1_complex	SPP1		Adhesion by Osteopontin	0	0	1.186	30.376	AD	sig	Proliferation	DAM1
CPI-SC069FF84F5	SPP1_integrin_a9b1_complex	SPP1		Adhesion by Osteopontin	0	0	1.2024	39.655	AD	sig	Proliferation	Homeostasis 1
CPI-SC069FF84F5	SPP1_integrin_a9b1_complex	SPP1		Adhesion by Osteopontin	0	0	1.2104	34.083	AD	sig	Proliferation	Homeostasis 2
CPI-SC069FF84F5	SPP1_integrin_a9b1_complex	SPP1		Adhesion by Osteopontin	0	0	1.1982	38.001	AD	sig	Proliferation	Inflammation
CPI-SC069FF84F5	SPP1_integrin_a9b1_complex	SPP1		Adhesion by Osteopontin	0	0	1.0545	12.814	AD	sig	Proliferation	T cell
CPI-SC069FF84F5	SPP1_integrin_a9b1_complex	SPP1		Adhesion by Osteopontin	0	0	1.2262	40.827	AD	sig	Proliferation	MHC 1
CPI-SC069FF84F5	SPP1_integrin_a9b1_complex	SPP1		Adhesion by Osteopontin	0	0	1.2658	36.116	AD	sig	Proliferation	MHC 2
CPI-SC069FF84F5	SPP1_integrin_a9b1_complex	SPP1		Adhesion by Osteopontin	0	0	1.1967	33.521	AD	sig	Proliferation	Macrophage
CPI-SC069FF84F5	SPP1_integrin_a9b1_complex	SPP1		Adhesion by Osteopontin	0	0	1.1298	25.357	AD	sig	Proliferation	Monocyte
CPI-SC069FF84F5	SPP1_integrin_a9b1_complex	SPP1		Adhesion by Osteopontin	0	0	1.2789	43.988	AD	sig	Proliferation	Proliferation
CPI-SC069FF84F5	SPP1_integrin_a9b1_complex	SPP1		Adhesion by Osteopontin	0	0	1.1581	31.904	AD	sig	Proliferation	Tau Microglia
CPI-SC0B5F57CE1	TNC_integrin_a9b1_complex	TNC		Adhesion by tenascin	0	0	0.2099	14.934	AD	sig	DAM1	MHC 1
CPI-SC0B5F57CE1	TNC_integrin_a9b1_complex	TNC		Adhesion by tenascin	0.0003	0.0035	0.2494	13.211	AD	sig	DAM1	MHC 2
CPI-SC0B5F57CE1	TNC_integrin_a9b1_complex	TNC		Adhesion by tenascin	0	0	0.2625	16.091	AD	sig	DAM1	Proliferation
CPI-SC0B5F57CE1	TNC_integrin_a9b1_complex	TNC		Adhesion by tenascin	0	0	0.2058	10.399	AD	sig	Homeostasis 1	MHC 1
CPI-SC0B5F57CE1	TNC_integrin_a9b1_complex	TNC		Adhesion by tenascin	0.0007	0.0079	0.2454	9.199	AD	sig	Homeostasis 1	MHC 2
CPI-SC0B5F57CE1	TNC_integrin_a9b1_complex	TNC		Adhesion by tenascin	0	0	0.2584	11.205	AD	sig	Homeostasis 1	Proliferation
CPI-SC0B5F57CE1	TNC_integrin_a9b1_complex	TNC		Adhesion by tenascin	0	0	0.209	14.019	AD	sig	Homeostasis 2	MHC 1
CPI-SC0B5F57CE1	TNC_integrin_a9b1_complex	TNC		Adhesion by tenascin	0.0003	0.0035	0.2486	12.401	AD	sig	Homeostasis 2	MHC 2
CPI-SC0B5F57CE1	TNC_integrin_a9b1_complex	TNC		Adhesion by tenascin	0	0	0.2617	15.105	AD	sig	Homeostasis 2	Proliferation
CPI-SC0B5F57CE1	TNC_integrin_a9b1_complex	TNC		Adhesion by tenascin	0.0045	0.0459	0.2078	25.209	AD	sig	Inflammation	Homeostasis 2
CPI-SC0B5F57CE1	TNC_integrin_a9b1_complex	TNC		Adhesion by tenascin	0	0	0.2236	30.197	AD	sig	Inflammation	MHC 1
CPI-SC0B5F57CE1	TNC_integrin_a9b1_complex	TNC		Adhesion by tenascin	0	0	0.2632	26.713	AD	sig	Inflammation	MHC 2
CPI-SC0B5F57CE1	TNC_integrin_a9b1_complex	TNC		Adhesion by tenascin	0	0	0.2762	32.535	AD	sig	Inflammation	Proliferation
CPI-SC0B5F57CE1	TNC_integrin_a9b1_complex	TNC		Adhesion by tenascin	0	0	0.2176	23.553	AD	sig	T cell	MHC 1
CPI-SC0B5F57CE1	TNC_integrin_a9b1_complex	TNC		Adhesion by tenascin	0	0	0.2572	20.835	AD	sig	T cell	MHC 2
CPI-SC0B5F57CE1	TNC_integrin_a9b1_complex	TNC		Adhesion by tenascin	0	0	0.2703	25.377	AD	sig	T cell	Proliferation
CPI-SC0B5F57CE1	TNC_integrin_a9b1_complex	TNC		Adhesion by tenascin	0.0049	0.0497	0.2041	8.471	AD	sig	MHC 2	MHC 1
CPI-SC0B5F57CE1	TNC_integrin_a9b1_complex	TNC		Adhesion by tenascin	0.002	0.0214	0.2436	7.493	AD	sig	MHC 2	MHC 2
CPI-SC0B5F57CE1	TNC_integrin_a9b1_complex	TNC		Adhesion by tenascin	0	0	0.2567	9.127	AD	sig	MHC 2	Proliferation
CPI-SC0B5F57CE1	TNC_integrin_a9b1_complex	TNC		Adhesion by tenascin	0	0	0.209	13.965	AD	sig	Macrophage	MHC 1
CPI-SC0B5F57CE1	TNC_integrin_a9b1_complex	TNC		Adhesion by tenascin	0.0003	0.0035	0.2486	12.353	AD	sig	Macrophage	MHC 2
CPI-SC0B5F57CE1	TNC_integrin_a9b1_complex	TNC		Adhesion by tenascin	0	0	0.2616	15.046	AD	sig	Macrophage	Proliferation
CPI-SC0B5F57CE1	TNC_integrin_a9b1_complex	TNC		Adhesion by tenascin	0	0	0.2064	11.111	AD	sig	Monocyte	MHC 1
CPI-SC0B5F57CE1	TNC_integrin_a9b1_complex	TNC		Adhesion by tenascin	0.0004	0.0046	0.246	9.829	AD	sig	Monocyte	MHC 2
CPI-SC0B5F57CE1	TNC_integrin_a9b1_complex	TNC		Adhesion by tenascin	0	0	0.2591	11.972	AD	sig	Monocyte	Proliferation
CPI-SC0B5F57CE1	TNC_integrin_a9b1_complex	TNC		Adhesion by tenascin	0	0	0.2044	8.88	AD	sig	Proliferation	MHC 1
CPI-SC0B5F57CE1	TNC_integrin_a9b1_complex	TNC		Adhesion by tenascin	0.001	0.0111	0.244	7.855	AD	sig	Proliferation	MHC 2
CPI-SC0B5F57CE1	TNC_integrin_a9b1_complex	TNC		Adhesion by tenascin	0	0	0.2571	9.568	AD	sig	Proliferation	Proliferation
CPI-SC0B5F57CE1	TNC_integrin_a9b1_complex	TNC		Adhesion by tenascin	0	0	0.2131	18.486	AD	sig	Tau Microglia	MHC 1
CPI-SC0B5F57CE1	TNC_integrin_a9b1_complex	TNC		Adhesion by tenascin	0	0	0.2526	16.352	AD	sig	Tau Microglia	MHC 2
CPI-SC0B5F57CE1	TNC_integrin_a9b1_complex	TNC		Adhesion by tenascin	0	0	0.2657	19.917	AD	sig	Tau Microglia	Proliferation
CPI-SS0C93E48D7	THBS1_CD36	THBS1	CD36	Signaling by Thrombospondin precursor	0	0	0.296	23.499	AD	sig	Macrophage	Monocyte
CPI-SS0C93E48D7	THBS1_CD36	THBS1	CD36	Signaling by Thrombospondin precursor	0	0	0.2832	6.008	AD	sig	Monocyte	MHC 2
CPI-SS0C93E48D7	THBS1_CD36	THBS1	CD36	Signaling by Thrombospondin precursor	0	0	0.3587	38.452	AD	sig	Monocyte	Macrophage
CPI-SS0C93E48D7	THBS1_CD36	THBS1	CD36	Signaling by Thrombospondin precursor	0	0	0.502	100	AD	sig	Monocyte	Monocyte
CPI-SS026C7F8A2	ENTPD1_ADORA1	ENTPD1	ADORA1	Signaling by Ectonucleoside	0	0	0.7019	45.015	AD	sig	DAM1	DAM1
CPI-SS026C7F8A2	ENTPD1_ADORA1	ENTPD1	ADORA1	Signaling by Ectonucleoside	0	0	0.7113	66.662	AD	sig	DAM1	Homeostasis 1
CPI-SS026C7F8A2	ENTPD1_ADORA1	ENTPD1	ADORA1	Signaling by Ectonucleoside	0	0	0.7056	53.429	AD	sig	DAM1	Homeostasis 2
CPI-SS026C7F8A2	ENTPD1_ADORA1	ENTPD1	ADORA1	Signaling by Ectonucleoside	0	0	0.6925	23.343	AD	sig	DAM1	Inflammation
CPI-SS026C7F8A2	ENTPD1_ADORA1	ENTPD1	ADORA1	Signaling by Ectonucleoside	0	0	0.7012	43.312	AD	sig	DAM1	MHC 1
CPI-SS026C7F8A2	ENTPD1_ADORA1	ENTPD1	ADORA1	Signaling by Ectonucleoside	0	0	0.7132	71.004	AD	sig	DAM1	MHC 2
CPI-SS026C7F8A2	ENTPD1_ADORA1	ENTPD1	ADORA1	Signaling by Ectonucleoside	0	0	0.6953	29.713	AD	sig	DAM1	Macrophage
CPI-SS026C7F8A2	ENTPD1_ADORA1	ENTPD1	ADORA1	Signaling by Ectonucleoside	0	0	0.6942	27.159	AD	sig	DAM1	Monocyte
CPI-SS026C7F8A2	ENTPD1_ADORA1	ENTPD1	ADORA1	Signaling by Ectonucleoside	0	0	0.7214	89.904	AD	sig	DAM1	Proliferation
CPI-SS026C7F8A2	ENTPD1_ADORA1	ENTPD1	ADORA1	Signaling by Ectonucleoside	0	0	0.6961	31.702	AD	sig	DAM1	Tau Microglia
CPI-SS026C7F8A2	ENTPD1_ADORA1	ENTPD1	ADORA1	Signaling by Ectonucleoside	0	0	0.6475	59.641	AD	sig	Homeostasis 1	Homeostasis 1
CPI-SS026C7F8A2	ENTPD1_ADORA1	ENTPD1	ADORA1	Signaling by Ectonucleoside	0	0	0.6576	80.436	AD	sig	Homeostasis 1	Proliferation
CPI-SS026C7F8A2	ENTPD1_ADORA1	ENTPD1	ADORA1	Signaling by Ectonucleoside	0	0	0.77	50.07	AD	sig	Homeostasis 2	DAM1
CPI-SS026C7F8A2	ENTPD1_ADORA1	ENTPD1	ADORA1	Signaling by Ectonucleoside	0	0	0.7794	74.148	AD	sig	Homeostasis 2	Homeostasis 1
CPI-SS026C7F8A2	ENTPD1_ADORA1	ENTPD1	ADORA1	Signaling by Ectonucleoside	0	0	0.7736	59.429	AD	sig	Homeostasis 2	Homeostasis 2
CPI-SS026C7F8A2	ENTPD1_ADORA1	ENTPD1	ADORA1	Signaling by Ectonucleoside	0	0	0.7605	25.965	AD	sig	Homeostasis 2	Inflammation
CPI-SS026C7F8A2	ENTPD1_ADORA1	ENTPD1	ADORA1	Signaling by Ectonucleoside	0	0	0.7692	48.176	AD	sig	Homeostasis 2	MHC 1
CPI-SS026C7F8A2	ENTPD1_ADORA1	ENTPD1	ADORA1	Signaling by Ectonucleoside	0	0	0.7813	78.978	AD	sig	Homeostasis 2	MHC 2
CPI-SS026C7F8A2	ENTPD1_ADORA1	ENTPD1	ADORA1	Signaling by Ectonucleoside	0	0	0.7633	33.05	AD	sig	Homeostasis 2	Macrophage
CPI-SS026C7F8A2	ENTPD1_ADORA1	ENTPD1	ADORA1	Signaling by Ectonucleoside	0	0	0.7622	30.209	AD	sig	Homeostasis 2	Monocyte
CPI-SS026C7F8A2	ENTPD1_ADORA1	ENTPD1	ADORA1	Signaling by Ectonucleoside	0	0	0.7895	100	AD	sig	Homeostasis 2	Proliferation
CPI-SS026C7F8A2	ENTPD1_ADORA1	ENTPD1	ADORA1	Signaling by Ectonucleoside	0	0	0.7642	35.263	AD	sig	Homeostasis 2	Tau Microglia
CPI-SS026C7F8A2	ENTPD1_ADORA1	ENTPD1	ADORA1	Signaling by Ectonucleoside	0	0	0.6942	44.443	AD	sig	Inflammation	DAM1
CPI-SS026C7F8A2	ENTPD1_ADORA1	ENTPD1	ADORA1	Signaling by Ectonucleoside	0	0	0.7036	65.815	AD	sig	Inflammation	Homeostasis 1
CPI-SS026C7F8A2	ENTPD1_ADORA1	ENTPD1	ADORA1	Signaling by Ectonucleoside	0	0	0.6979	52.75	AD	sig	Inflammation	Homeostasis 2
CPI-SS026C7F8A2	ENTPD1_ADORA1	ENTPD1	ADORA1	Signaling by Ectonucleoside	0	0	0.6848	23.047	AD	sig	Inflammation	Inflammation
CPI-SS026C7F8A2	ENTPD1_ADORA1	ENTPD1	ADORA1	Signaling by Ectonucleoside	0	0	0.6935	42.762	AD	sig	Inflammation	MHC 1
CPI-SS026C7F8A2	ENTPD1_ADORA1	ENTPD1	ADORA1	Signaling by Ectonucleoside	0	0	0.7055	70.102	AD	sig	Inflammation	MHC 2
CPI-SS026C7F8A2	ENTPD1_ADORA1	ENTPD1	ADORA1	Signaling by Ectonucleoside	0	0	0.6876	29.335	AD	sig	Inflammation	Macrophage
CPI-SS026C7F8A2	ENTPD1_ADORA1	ENTPD1	ADORA1	Signaling by Ectonucleoside	0	0	0.6865	26.814	AD	sig	Inflammation	Monocyte
CPI-SS026C7F8A2	ENTPD1_ADORA1	ENTPD1	ADORA1	Signaling by Ectonucleoside	0	0	0.7137	88.761	AD	sig	Inflammation	Proliferation
CPI-SS026C7F8A2	ENTPD1_ADORA1	ENTPD1	ADORA1	Signaling by Ectonucleoside	0	0	0.6884	31.3	AD	sig	Inflammation	Tau Microglia
CPI-SS026C7F8A2	ENTPD1_ADORA1	ENTPD1	ADORA1	Signaling by Ectonucleoside	0	0	0.7141	45.917	AD	sig	Tau Microglia	DAM1
CPI-SS026C7F8A2	ENTPD1_ADORA1	ENTPD1	ADORA1	Signaling by Ectonucleoside	0	0	0.7235	67.997	AD	sig	Tau Microglia	Homeostasis 1
CPI-SS026C7F8A2	ENTPD1_ADORA1	ENTPD1	ADORA1	Signaling by Ectonucleoside	0	0	0.7177	54.499	AD	sig	Tau Microglia	Homeostasis 2
CPI-SS026C7F8A2	ENTPD1_ADORA1	ENTPD1	ADORA1	Signaling by Ectonucleoside	0	0	0.7046	23.811	AD	sig	Tau Microglia	Inflammation
CPI-SS026C7F8A2	ENTPD1_ADORA1	ENTPD1	ADORA1	Signaling by Ectonucleoside	0	0	0.7133	44.18	AD	sig	Tau Microglia	MHC 1
CPI-SS026C7F8A2	ENTPD1_ADORA1	ENTPD1	ADORA1	Signaling by Ectonucleoside	0	0	0.7254	72.427	AD	sig	Tau Microglia	MHC 2
CPI-SS026C7F8A2	ENTPD1_ADORA1	ENTPD1	ADORA1	Signaling by Ectonucleoside	0	0	0.7074	30.308	AD	sig	Tau Microglia	Macrophage
CPI-SS026C7F8A2	ENTPD1_ADORA1	ENTPD1	ADORA1	Signaling by Ectonucleoside	0	0	0.7063	27.703	AD	sig	Tau Microglia	Monocyte
CPI-SS026C7F8A2	ENTPD1_ADORA1	ENTPD1	ADORA1	Signaling by Ectonucleoside	0	0	0.7336	91.705	AD	sig	Tau Microglia	Proliferation
CPI-SS026C7F8A2	ENTPD1_ADORA1	ENTPD1	ADORA1	Signaling by Ectonucleoside	0	0	0.7083	32.338	AD	sig	Tau Microglia	Tau Microglia
CPI-SS08C884E97	ENTPD1_ADORA2B	ENTPD1	ADORA2B	Signaling by Ectonucleoside	0	0	0.7073	54.803	AD	sig	DAM1	Monocyte
CPI-SS08C884E97	ENTPD1_ADORA2B	ENTPD1	ADORA2B	Signaling by Ectonucleoside	0	0	0.6435	49.032	AD	sig	Homeostasis 1	Monocyte
CPI-SS08C884E97	ENTPD1_ADORA2B	ENTPD1	ADORA2B	Signaling by Ectonucleoside	0	0	0.7753	60.958	AD	sig	Homeostasis 2	Monocyte
CPI-SS08C884E97	ENTPD1_ADORA2B	ENTPD1	ADORA2B	Signaling by Ectonucleoside	0	0	0.6996	54.107	AD	sig	Inflammation	Monocyte
CPI-SS08C884E97	ENTPD1_ADORA2B	ENTPD1	ADORA2B	Signaling by Ectonucleoside	0	0	0.7194	55.901	AD	sig	Tau Microglia	Monocyte
CPI-SS0276D5C7E	ENTPD1_ADORA3	ENTPD1	ADORA3	Signaling by Ectonucleoside	0	0	0.7188	23.853	AD	sig	DAM1	DAM1
CPI-SS0276D5C7E	ENTPD1_ADORA3	ENTPD1	ADORA3	Signaling by Ectonucleoside	0	0	0.7634	53.111	AD	sig	DAM1	Homeostasis 1
CPI-SS0276D5C7E	ENTPD1_ADORA3	ENTPD1	ADORA3	Signaling by Ectonucleoside	0	0	0.7643	53.718	AD	sig	DAM1	Homeostasis 2
CPI-SS0276D5C7E	ENTPD1_ADORA3	ENTPD1	ADORA3	Signaling by Ectonucleoside	0	0	0.7428	39.577	AD	sig	DAM1	MHC 1
CPI-SS0276D5C7E	ENTPD1_ADORA3	ENTPD1	ADORA3	Signaling by Ectonucleoside	0	0	0.7318	32.429	AD	sig	DAM1	MHC 2
CPI-SS0276D5C7E	ENTPD1_ADORA3	ENTPD1	ADORA3	Signaling by Ectonucleoside	0	0	0.7108	18.668	AD	sig	DAM1	Macrophage
CPI-SS0276D5C7E	ENTPD1_ADORA3	ENTPD1	ADORA3	Signaling by Ectonucleoside	0	0	0.7568	48.786	AD	sig	DAM1	Proliferation
CPI-SS0276D5C7E	ENTPD1_ADORA3	ENTPD1	ADORA3	Signaling by Ectonucleoside	0	0	0.6948	8.173	AD	sig	DAM1	Tau Microglia
CPI-SS0276D5C7E	ENTPD1_ADORA3	ENTPD1	ADORA3	Signaling by Ectonucleoside	0	0	0.6996	47.518	AD	sig	Homeostasis 1	Homeostasis 1
CPI-SS0276D5C7E	ENTPD1_ADORA3	ENTPD1	ADORA3	Signaling by Ectonucleoside	0	0	0.7005	48.061	AD	sig	Homeostasis 1	Homeostasis 2
CPI-SS0276D5C7E	ENTPD1_ADORA3	ENTPD1	ADORA3	Signaling by Ectonucleoside	0	0	0.679	35.409	AD	sig	Homeostasis 1	MHC 1
CPI-SS0276D5C7E	ENTPD1_ADORA3	ENTPD1	ADORA3	Signaling by Ectonucleoside	0	0	0.693	43.648	AD	sig	Homeostasis 1	Proliferation
CPI-SS0276D5C7E	ENTPD1_ADORA3	ENTPD1	ADORA3	Signaling by Ectonucleoside	0	0	0.7868	26.532	AD	sig	Homeostasis 2	DAM1
CPI-SS0276D5C7E	ENTPD1_ADORA3	ENTPD1	ADORA3	Signaling by Ectonucleoside	0	0	0.8314	59.076	AD	sig	Homeostasis 2	Homeostasis 1
CPI-SS0276D5C7E	ENTPD1_ADORA3	ENTPD1	ADORA3	Signaling by Ectonucleoside	0	0	0.8324	59.751	AD	sig	Homeostasis 2	Homeostasis 2
CPI-SS0276D5C7E	ENTPD1_ADORA3	ENTPD1	ADORA3	Signaling by Ectonucleoside	0	0	0.8108	44.021	AD	sig	Homeostasis 2	MHC 1
CPI-SS0276D5C7E	ENTPD1_ADORA3	ENTPD1	ADORA3	Signaling by Ectonucleoside	0	0	0.7999	36.071	AD	sig	Homeostasis 2	MHC 2
CPI-SS0276D5C7E	ENTPD1_ADORA3	ENTPD1	ADORA3	Signaling by Ectonucleoside	0	0	0.7789	20.765	AD	sig	Homeostasis 2	Macrophage
CPI-SS0276D5C7E	ENTPD1_ADORA3	ENTPD1	ADORA3	Signaling by Ectonucleoside	0	0	0.8248	54.265	AD	sig	Homeostasis 2	Proliferation
CPI-SS0276D5C7E	ENTPD1_ADORA3	ENTPD1	ADORA3	Signaling by Ectonucleoside	0	0	0.7629	9.091	AD	sig	Homeostasis 2	Tau Microglia
CPI-SS0276D5C7E	ENTPD1_ADORA3	ENTPD1	ADORA3	Signaling by Ectonucleoside	0	0	0.7111	23.55	AD	sig	Inflammation	DAM1
CPI-SS0276D5C7E	ENTPD1_ADORA3	ENTPD1	ADORA3	Signaling by Ectonucleoside	0	0	0.7557	52.437	AD	sig	Inflammation	Homeostasis 1
CPI-SS0276D5C7E	ENTPD1_ADORA3	ENTPD1	ADORA3	Signaling by Ectonucleoside	0	0	0.7566	53.036	AD	sig	Inflammation	Homeostasis 2
CPI-SS0276D5C7E	ENTPD1_ADORA3	ENTPD1	ADORA3	Signaling by Ectonucleoside	0	0	0.7351	39.074	AD	sig	Inflammation	MHC 1
CPI-SS0276D5C7E	ENTPD1_ADORA3	ENTPD1	ADORA3	Signaling by Ectonucleoside	0	0	0.7242	32.017	AD	sig	Inflammation	MHC 2
CPI-SS0276D5C7E	ENTPD1_ADORA3	ENTPD1	ADORA3	Signaling by Ectonucleoside	0	0	0.7031	18.431	AD	sig	Inflammation	Macrophage
CPI-SS0276D5C7E	ENTPD1_ADORA3	ENTPD1	ADORA3	Signaling by Ectonucleoside	0	0	0.7491	48.166	AD	sig	Inflammation	Proliferation
CPI-SS0276D5C7E	ENTPD1_ADORA3	ENTPD1	ADORA3	Signaling by Ectonucleoside	0.0019	0.0204	0.6797	45.774	AD	sig	MHC 1	Homeostasis 1
CPI-SS0276D5C7E	ENTPD1_ADORA3	ENTPD1	ADORA3	Signaling by Ectonucleoside	0.0023	0.0244	0.7091	48.35	AD	sig	Proliferation	Homeostasis 1
CPI-SS0276D5C7E	ENTPD1_ADORA3	ENTPD1	ADORA3	Signaling by Ectonucleoside	0.0024	0.0254	0.71	48.902	AD	sig	Proliferation	Homeostasis 2
CPI-SS0276D5C7E	ENTPD1_ADORA3	ENTPD1	ADORA3	Signaling by Ectonucleoside	0	0	0.7309	24.331	AD	sig	Tau Microglia	DAM1
CPI-SS0276D5C7E	ENTPD1_ADORA3	ENTPD1	ADORA3	Signaling by Ectonucleoside	0	0	0.7756	54.176	AD	sig	Tau Microglia	Homeostasis 1
CPI-SS0276D5C7E	ENTPD1_ADORA3	ENTPD1	ADORA3	Signaling by Ectonucleoside	0	0	0.7765	54.794	AD	sig	Tau Microglia	Homeostasis 2
CPI-SS0276D5C7E	ENTPD1_ADORA3	ENTPD1	ADORA3	Signaling by Ectonucleoside	0	0	0.7549	40.37	AD	sig	Tau Microglia	MHC 1
CPI-SS0276D5C7E	ENTPD1_ADORA3	ENTPD1	ADORA3	Signaling by Ectonucleoside	0	0	0.744	33.079	AD	sig	Tau Microglia	MHC 2
CPI-SS0276D5C7E	ENTPD1_ADORA3	ENTPD1	ADORA3	Signaling by Ectonucleoside	0	0	0.723	19.042	AD	sig	Tau Microglia	Macrophage
CPI-SS0276D5C7E	ENTPD1_ADORA3	ENTPD1	ADORA3	Signaling by Ectonucleoside	0	0	0.769	49.764	AD	sig	Tau Microglia	Proliferation
CPI-SS0276D5C7E	ENTPD1_ADORA3	ENTPD1	ADORA3	Signaling by Ectonucleoside	0	0	0.707	8.337	AD	sig	Tau Microglia	Tau Microglia
CPI-SS08968FFAE	LRRTM4_PTPRS	LRRTM4	PTPRS	Signaling by Leucine-Rich Repeat Transmembrane Neuronal Protein	0	0	0.3182	16.172	AD	sig	Homeostasis 1	DAM1
CPI-SS08968FFAE	LRRTM4_PTPRS	LRRTM4	PTPRS	Signaling by Leucine-Rich Repeat Transmembrane Neuronal Protein	0	0	0.3467	31.475	AD	sig	Homeostasis 1	Homeostasis 1
CPI-SS08968FFAE	LRRTM4_PTPRS	LRRTM4	PTPRS	Signaling by Leucine-Rich Repeat Transmembrane Neuronal Protein	0	0	0.3137	13.704	AD	sig	Homeostasis 1	Homeostasis 2
CPI-SS08968FFAE	LRRTM4_PTPRS	LRRTM4	PTPRS	Signaling by Leucine-Rich Repeat Transmembrane Neuronal Protein	0	0	0.316	14.984	AD	sig	Homeostasis 1	Inflammation
CPI-SS08968FFAE	LRRTM4_PTPRS	LRRTM4	PTPRS	Signaling by Leucine-Rich Repeat Transmembrane Neuronal Protein	0	0	0.3111	12.328	AD	sig	Homeostasis 1	T cell
CPI-SS08968FFAE	LRRTM4_PTPRS	LRRTM4	PTPRS	Signaling by Leucine-Rich Repeat Transmembrane Neuronal Protein	0	0	0.331	23.06	AD	sig	Homeostasis 1	MHC 1
CPI-SS08968FFAE	LRRTM4_PTPRS	LRRTM4	PTPRS	Signaling by Leucine-Rich Repeat Transmembrane Neuronal Protein	0	0	0.3317	23.427	AD	sig	Homeostasis 1	MHC 2
CPI-SS08968FFAE	LRRTM4_PTPRS	LRRTM4	PTPRS	Signaling by Leucine-Rich Repeat Transmembrane Neuronal Protein	0	0	0.3196	16.902	AD	sig	Homeostasis 1	Macrophage
CPI-SS08968FFAE	LRRTM4_PTPRS	LRRTM4	PTPRS	Signaling by Leucine-Rich Repeat Transmembrane Neuronal Protein	0	0	0.3202	17.242	AD	sig	Homeostasis 1	Monocyte
CPI-SS08968FFAE	LRRTM4_PTPRS	LRRTM4	PTPRS	Signaling by Leucine-Rich Repeat Transmembrane Neuronal Protein	0	0	0.3355	25.448	AD	sig	Homeostasis 1	Proliferation
CPI-SS08968FFAE	LRRTM4_PTPRS	LRRTM4	PTPRS	Signaling by Leucine-Rich Repeat Transmembrane Neuronal Protein	0	0	0.3112	12.399	AD	sig	Homeostasis 1	Tau Microglia
CPI-SS08968FFAE	LRRTM4_PTPRS	LRRTM4	PTPRS	Signaling by Leucine-Rich Repeat Transmembrane Neuronal Protein	0.0018	0.0194	0.2415	18.31	AD	sig	MHC 1	Homeostasis 1
CPI-SS08968FFAE	LRRTM4_PTPRS	LRRTM4	PTPRS	Signaling by Leucine-Rich Repeat Transmembrane Neuronal Protein	0	0	0.2812	23.281	AD	sig	Proliferation	Homeostasis 1
CPI-SS08968FFAE	LRRTM4_PTPRS	LRRTM4	PTPRS	Signaling by Leucine-Rich Repeat Transmembrane Neuronal Protein	0.0001	0.0012	0.2656	17.057	AD	sig	Proliferation	MHC 1
CPI-SS08968FFAE	LRRTM4_PTPRS	LRRTM4	PTPRS	Signaling by Leucine-Rich Repeat Transmembrane Neuronal Protein	0.0001	0.0012	0.27	18.823	AD	sig	Proliferation	Proliferation
CPI-SS080C81D37	APP_CD74	APP	CD74	Signaling by Amyloid-beta precursor protein	0	0	0.8989	5.078	AD	sig	DAM1	Homeostasis 1
CPI-SS080C81D37	APP_CD74	APP	CD74	Signaling by Amyloid-beta precursor protein	0	0	1.0247	6.158	AD	sig	DAM1	Homeostasis 2
CPI-SS080C81D37	APP_CD74	APP	CD74	Signaling by Amyloid-beta precursor protein	0	0	1.0251	6.161	AD	sig	DAM1	Inflammation
CPI-SS080C81D37	APP_CD74	APP	CD74	Signaling by Amyloid-beta precursor protein	0	0	0.9216	5.273	AD	sig	DAM1	MHC 1
CPI-SS080C81D37	APP_CD74	APP	CD74	Signaling by Amyloid-beta precursor protein	0	0	1.3646	9.075	AD	sig	DAM1	MHC 2
CPI-SS080C81D37	APP_CD74	APP	CD74	Signaling by Amyloid-beta precursor protein	0	0	0.8819	9.503	AD	sig	Homeostasis 1	DAM1
CPI-SS080C81D37	APP_CD74	APP	CD74	Signaling by Amyloid-beta precursor protein	0	0	0.9931	11.7	AD	sig	Homeostasis 1	Homeostasis 1
CPI-SS080C81D37	APP_CD74	APP	CD74	Signaling by Amyloid-beta precursor protein	0	0	1.1189	14.188	AD	sig	Homeostasis 1	Homeostasis 2
CPI-SS080C81D37	APP_CD74	APP	CD74	Signaling by Amyloid-beta precursor protein	0	0	1.1193	14.196	AD	sig	Homeostasis 1	Inflammation
CPI-SS080C81D37	APP_CD74	APP	CD74	Signaling by Amyloid-beta precursor protein	0	0	1.0158	12.149	AD	sig	Homeostasis 1	MHC 1
CPI-SS080C81D37	APP_CD74	APP	CD74	Signaling by Amyloid-beta precursor protein	0	0	1.4588	20.907	AD	sig	Homeostasis 1	MHC 2
CPI-SS080C81D37	APP_CD74	APP	CD74	Signaling by Amyloid-beta precursor protein	0	0	0.8694	9.254	AD	sig	Homeostasis 1	Tau Microglia
CPI-SS080C81D37	APP_CD74	APP	CD74	Signaling by Amyloid-beta precursor protein	0	0	0.9048	5.494	AD	sig	Homeostasis 2	Homeostasis 1
CPI-SS080C81D37	APP_CD74	APP	CD74	Signaling by Amyloid-beta precursor protein	0	0	1.0306	6.662	AD	sig	Homeostasis 2	Homeostasis 2
CPI-SS080C81D37	APP_CD74	APP	CD74	Signaling by Amyloid-beta precursor protein	0	0	1.031	6.665	AD	sig	Homeostasis 2	Inflammation
CPI-SS080C81D37	APP_CD74	APP	CD74	Signaling by Amyloid-beta precursor protein	0	0	0.9275	5.704	AD	sig	Homeostasis 2	MHC 1
CPI-SS080C81D37	APP_CD74	APP	CD74	Signaling by Amyloid-beta precursor protein	0	0	1.3705	9.817	AD	sig	Homeostasis 2	MHC 2
CPI-SS080C81D37	APP_CD74	APP	CD74	Signaling by Amyloid-beta precursor protein	0	0	0.8846	4.079	AD	sig	Inflammation	Homeostasis 1
CPI-SS080C81D37	APP_CD74	APP	CD74	Signaling by Amyloid-beta precursor protein	0	0	1.0105	4.946	AD	sig	Inflammation	Homeostasis 2
CPI-SS080C81D37	APP_CD74	APP	CD74	Signaling by Amyloid-beta precursor protein	0	0	1.0109	4.949	AD	sig	Inflammation	Inflammation
CPI-SS080C81D37	APP_CD74	APP	CD74	Signaling by Amyloid-beta precursor protein	0	0	0.9074	4.235	AD	sig	Inflammation	MHC 1
CPI-SS080C81D37	APP_CD74	APP	CD74	Signaling by Amyloid-beta precursor protein	0	0	1.3504	7.288	AD	sig	Inflammation	MHC 2
CPI-SS080C81D37	APP_CD74	APP	CD74	Signaling by Amyloid-beta precursor protein	0	0	0.9525	0	AD	sig	T cell	Homeostasis 2
CPI-SS080C81D37	APP_CD74	APP	CD74	Signaling by Amyloid-beta precursor protein	0	0	0.9529	0	AD	sig	T cell	Inflammation
CPI-SS080C81D37	APP_CD74	APP	CD74	Signaling by Amyloid-beta precursor protein	0	0	1.2923	0	AD	sig	T cell	MHC 2
CPI-SS080C81D37	APP_CD74	APP	CD74	Signaling by Amyloid-beta precursor protein	0.0001	0.0012	0.8724	8.959	AD	sig	MHC 1	DAM1
CPI-SS080C81D37	APP_CD74	APP	CD74	Signaling by Amyloid-beta precursor protein	0	0	0.9836	11.03	AD	sig	MHC 1	Homeostasis 1
CPI-SS080C81D37	APP_CD74	APP	CD74	Signaling by Amyloid-beta precursor protein	0	0	1.1094	13.376	AD	sig	MHC 1	Homeostasis 2
CPI-SS080C81D37	APP_CD74	APP	CD74	Signaling by Amyloid-beta precursor protein	0	0	1.1098	13.384	AD	sig	MHC 1	Inflammation
CPI-SS080C81D37	APP_CD74	APP	CD74	Signaling by Amyloid-beta precursor protein	0	0	1.0063	11.454	AD	sig	MHC 1	MHC 1
CPI-SS080C81D37	APP_CD74	APP	CD74	Signaling by Amyloid-beta precursor protein	0	0	1.4493	19.711	AD	sig	MHC 1	MHC 2
CPI-SS080C81D37	APP_CD74	APP	CD74	Signaling by Amyloid-beta precursor protein	0.0004	0.0046	0.935	7.62	AD	sig	MHC 2	Homeostasis 1
CPI-SS080C81D37	APP_CD74	APP	CD74	Signaling by Amyloid-beta precursor protein	0	0	1.0609	9.24	AD	sig	MHC 2	Homeostasis 2
CPI-SS080C81D37	APP_CD74	APP	CD74	Signaling by Amyloid-beta precursor protein	0	0	1.0613	9.245	AD	sig	MHC 2	Inflammation
CPI-SS080C81D37	APP_CD74	APP	CD74	Signaling by Amyloid-beta precursor protein	0	0	0.9577	7.912	AD	sig	MHC 2	MHC 1
CPI-SS080C81D37	APP_CD74	APP	CD74	Signaling by Amyloid-beta precursor protein	0	0	1.4007	13.616	AD	sig	MHC 2	MHC 2
CPI-SS080C81D37	APP_CD74	APP	CD74	Signaling by Amyloid-beta precursor protein	0	0	0.8997	10.513	AD	sig	Macrophage	DAM1
CPI-SS080C81D37	APP_CD74	APP	CD74	Signaling by Amyloid-beta precursor protein	0	0	1.0108	12.944	AD	sig	Macrophage	Homeostasis 1
CPI-SS080C81D37	APP_CD74	APP	CD74	Signaling by Amyloid-beta precursor protein	0	0	1.1366	15.697	AD	sig	Macrophage	Homeostasis 2
CPI-SS080C81D37	APP_CD74	APP	CD74	Signaling by Amyloid-beta precursor protein	0	0	1.137	15.706	AD	sig	Macrophage	Inflammation
CPI-SS080C81D37	APP_CD74	APP	CD74	Signaling by Amyloid-beta precursor protein	0	0	1.0335	13.441	AD	sig	Macrophage	MHC 1
CPI-SS080C81D37	APP_CD74	APP	CD74	Signaling by Amyloid-beta precursor protein	0	0	1.4765	23.131	AD	sig	Macrophage	MHC 2
CPI-SS080C81D37	APP_CD74	APP	CD74	Signaling by Amyloid-beta precursor protein	0	0	0.8871	10.238	AD	sig	Macrophage	Tau Microglia
CPI-SS080C81D37	APP_CD74	APP	CD74	Signaling by Amyloid-beta precursor protein	0	0	0.9064	10.897	AD	sig	Monocyte	DAM1
CPI-SS080C81D37	APP_CD74	APP	CD74	Signaling by Amyloid-beta precursor protein	0	0	1.0175	13.416	AD	sig	Monocyte	Homeostasis 1
CPI-SS080C81D37	APP_CD74	APP	CD74	Signaling by Amyloid-beta precursor protein	0	0	1.1433	16.269	AD	sig	Monocyte	Homeostasis 2
CPI-SS080C81D37	APP_CD74	APP	CD74	Signaling by Amyloid-beta precursor protein	0	0	1.1437	16.279	AD	sig	Monocyte	Inflammation
CPI-SS080C81D37	APP_CD74	APP	CD74	Signaling by Amyloid-beta precursor protein	0	0	1.0402	13.931	AD	sig	Monocyte	MHC 1
CPI-SS080C81D37	APP_CD74	APP	CD74	Signaling by Amyloid-beta precursor protein	0	0	1.4832	23.975	AD	sig	Monocyte	MHC 2
CPI-SS080C81D37	APP_CD74	APP	CD74	Signaling by Amyloid-beta precursor protein	0.0001	0.0012	0.8938	10.612	AD	sig	Monocyte	Tau Microglia
CPI-SS080C81D37	APP_CD74	APP	CD74	Signaling by Amyloid-beta precursor protein	0	0	0.9373	7.783	AD	sig	Proliferation	Homeostasis 1
CPI-SS080C81D37	APP_CD74	APP	CD74	Signaling by Amyloid-beta precursor protein	0	0	1.0632	9.438	AD	sig	Proliferation	Homeostasis 2
CPI-SS080C81D37	APP_CD74	APP	CD74	Signaling by Amyloid-beta precursor protein	0	0	1.0636	9.443	AD	sig	Proliferation	Inflammation
CPI-SS080C81D37	APP_CD74	APP	CD74	Signaling by Amyloid-beta precursor protein	0	0	0.9601	8.081	AD	sig	Proliferation	MHC 1
CPI-SS080C81D37	APP_CD74	APP	CD74	Signaling by Amyloid-beta precursor protein	0	0	1.4031	13.908	AD	sig	Proliferation	MHC 2
CPI-SS080C81D37	APP_CD74	APP	CD74	Signaling by Amyloid-beta precursor protein	0.0013	0.0142	0.866	2.765	AD	sig	Tau Microglia	Homeostasis 1
CPI-SS080C81D37	APP_CD74	APP	CD74	Signaling by Amyloid-beta precursor protein	0	0	0.9918	3.353	AD	sig	Tau Microglia	Homeostasis 2
CPI-SS080C81D37	APP_CD74	APP	CD74	Signaling by Amyloid-beta precursor protein	0	0	0.9922	3.355	AD	sig	Tau Microglia	Inflammation
CPI-SS080C81D37	APP_CD74	APP	CD74	Signaling by Amyloid-beta precursor protein	0	0	0.8887	2.871	AD	sig	Tau Microglia	MHC 1
CPI-SS080C81D37	APP_CD74	APP	CD74	Signaling by Amyloid-beta precursor protein	0	0	1.3317	4.941	AD	sig	Tau Microglia	MHC 2
CPI-SS0CB6F5575	APP_PLXNA4	APP	PLXNA4	Signaling by Amyloid-beta precursor protein	0	0	0.2925	2.104	AD	sig	Homeostasis 1	DAM1
CPI-SS0CB6F5575	APP_PLXNA4	APP	PLXNA4	Signaling by Amyloid-beta precursor protein	0	0	0.3244	7.967	AD	sig	Homeostasis 1	Homeostasis 1
CPI-SS0CB6F5575	APP_PLXNA4	APP	PLXNA4	Signaling by Amyloid-beta precursor protein	0	0	0.2953	2.63	AD	sig	Homeostasis 1	Homeostasis 2
CPI-SS0CB6F5575	APP_PLXNA4	APP	PLXNA4	Signaling by Amyloid-beta precursor protein	0	0	0.281	0	AD	sig	Homeostasis 1	Inflammation
CPI-SS0CB6F5575	APP_PLXNA4	APP	PLXNA4	Signaling by Amyloid-beta precursor protein	0	0	0.3105	5.41	AD	sig	Homeostasis 1	T cell
CPI-SS0CB6F5575	APP_PLXNA4	APP	PLXNA4	Signaling by Amyloid-beta precursor protein	0	0	0.3131	5.892	AD	sig	Homeostasis 1	MHC 1
CPI-SS0CB6F5575	APP_PLXNA4	APP	PLXNA4	Signaling by Amyloid-beta precursor protein	0	0	0.3046	4.328	AD	sig	Homeostasis 1	MHC 2
CPI-SS0CB6F5575	APP_PLXNA4	APP	PLXNA4	Signaling by Amyloid-beta precursor protein	0	0	0.3022	3.895	AD	sig	Homeostasis 1	Macrophage
CPI-SS0CB6F5575	APP_PLXNA4	APP	PLXNA4	Signaling by Amyloid-beta precursor protein	0	0	0.2965	2.837	AD	sig	Homeostasis 1	Monocyte
CPI-SS0CB6F5575	APP_PLXNA4	APP	PLXNA4	Signaling by Amyloid-beta precursor protein	0	0	0.3205	7.245	AD	sig	Homeostasis 1	Proliferation
CPI-SS0CB6F5575	APP_PLXNA4	APP	PLXNA4	Signaling by Amyloid-beta precursor protein	0	0	0.2889	1.452	AD	sig	Homeostasis 1	Tau Microglia
CPI-SS0CB6F5575	APP_PLXNA4	APP	PLXNA4	Signaling by Amyloid-beta precursor protein	0	0	0.2829	1.984	AD	sig	MHC 1	DAM1
CPI-SS0CB6F5575	APP_PLXNA4	APP	PLXNA4	Signaling by Amyloid-beta precursor protein	0	0	0.3149	7.511	AD	sig	MHC 1	Homeostasis 1
CPI-SS0CB6F5575	APP_PLXNA4	APP	PLXNA4	Signaling by Amyloid-beta precursor protein	0	0	0.2858	2.479	AD	sig	MHC 1	Homeostasis 2
CPI-SS0CB6F5575	APP_PLXNA4	APP	PLXNA4	Signaling by Amyloid-beta precursor protein	0	0	0.2715	0	AD	sig	MHC 1	Inflammation
CPI-SS0CB6F5575	APP_PLXNA4	APP	PLXNA4	Signaling by Amyloid-beta precursor protein	0	0	0.3009	5.101	AD	sig	MHC 1	T cell
CPI-SS0CB6F5575	APP_PLXNA4	APP	PLXNA4	Signaling by Amyloid-beta precursor protein	0	0	0.3036	5.555	AD	sig	MHC 1	MHC 1
CPI-SS0CB6F5575	APP_PLXNA4	APP	PLXNA4	Signaling by Amyloid-beta precursor protein	0.0001	0.0012	0.2951	4.081	AD	sig	MHC 1	MHC 2
CPI-SS0CB6F5575	APP_PLXNA4	APP	PLXNA4	Signaling by Amyloid-beta precursor protein	0	0	0.2927	3.672	AD	sig	MHC 1	Macrophage
CPI-SS0CB6F5575	APP_PLXNA4	APP	PLXNA4	Signaling by Amyloid-beta precursor protein	0	0	0.2869	2.675	AD	sig	MHC 1	Monocyte
CPI-SS0CB6F5575	APP_PLXNA4	APP	PLXNA4	Signaling by Amyloid-beta precursor protein	0	0	0.3109	6.83	AD	sig	MHC 1	Proliferation
CPI-SS0CB6F5575	APP_PLXNA4	APP	PLXNA4	Signaling by Amyloid-beta precursor protein	0	0	0.2794	1.369	AD	sig	MHC 1	Tau Microglia
CPI-SS0CB6F5575	APP_PLXNA4	APP	PLXNA4	Signaling by Amyloid-beta precursor protein	0	0	0.3102	2.328	AD	sig	Macrophage	DAM1
CPI-SS0CB6F5575	APP_PLXNA4	APP	PLXNA4	Signaling by Amyloid-beta precursor protein	0	0	0.3421	8.815	AD	sig	Macrophage	Homeostasis 1
CPI-SS0CB6F5575	APP_PLXNA4	APP	PLXNA4	Signaling by Amyloid-beta precursor protein	0	0	0.313	2.91	AD	sig	Macrophage	Homeostasis 2
CPI-SS0CB6F5575	APP_PLXNA4	APP	PLXNA4	Signaling by Amyloid-beta precursor protein	0	0	0.2987	0	AD	sig	Macrophage	Inflammation
CPI-SS0CB6F5575	APP_PLXNA4	APP	PLXNA4	Signaling by Amyloid-beta precursor protein	0	0	0.3282	5.986	AD	sig	Macrophage	T cell
CPI-SS0CB6F5575	APP_PLXNA4	APP	PLXNA4	Signaling by Amyloid-beta precursor protein	0	0	0.3308	6.519	AD	sig	Macrophage	MHC 1
CPI-SS0CB6F5575	APP_PLXNA4	APP	PLXNA4	Signaling by Amyloid-beta precursor protein	0	0	0.3223	4.789	AD	sig	Macrophage	MHC 2
CPI-SS0CB6F5575	APP_PLXNA4	APP	PLXNA4	Signaling by Amyloid-beta precursor protein	0	0	0.3199	4.309	AD	sig	Macrophage	Macrophage
CPI-SS0CB6F5575	APP_PLXNA4	APP	PLXNA4	Signaling by Amyloid-beta precursor protein	0	0	0.3142	3.139	AD	sig	Macrophage	Monocyte
CPI-SS0CB6F5575	APP_PLXNA4	APP	PLXNA4	Signaling by Amyloid-beta precursor protein	0	0	0.3382	8.015	AD	sig	Macrophage	Proliferation
CPI-SS0CB6F5575	APP_PLXNA4	APP	PLXNA4	Signaling by Amyloid-beta precursor protein	0	0	0.3066	1.606	AD	sig	Macrophage	Tau Microglia
CPI-SS0CB6F5575	APP_PLXNA4	APP	PLXNA4	Signaling by Amyloid-beta precursor protein	0	0	0.3169	2.413	AD	sig	Monocyte	DAM1
CPI-SS0CB6F5575	APP_PLXNA4	APP	PLXNA4	Signaling by Amyloid-beta precursor protein	0	0	0.3488	9.136	AD	sig	Monocyte	Homeostasis 1
CPI-SS0CB6F5575	APP_PLXNA4	APP	PLXNA4	Signaling by Amyloid-beta precursor protein	0	0	0.3197	3.016	AD	sig	Monocyte	Homeostasis 2
CPI-SS0CB6F5575	APP_PLXNA4	APP	PLXNA4	Signaling by Amyloid-beta precursor protein	0	0	0.3054	0	AD	sig	Monocyte	Inflammation
CPI-SS0CB6F5575	APP_PLXNA4	APP	PLXNA4	Signaling by Amyloid-beta precursor protein	0	0	0.3349	6.204	AD	sig	Monocyte	T cell
CPI-SS0CB6F5575	APP_PLXNA4	APP	PLXNA4	Signaling by Amyloid-beta precursor protein	0	0	0.3375	6.757	AD	sig	Monocyte	MHC 1
CPI-SS0CB6F5575	APP_PLXNA4	APP	PLXNA4	Signaling by Amyloid-beta precursor protein	0	0	0.329	4.964	AD	sig	Monocyte	MHC 2
CPI-SS0CB6F5575	APP_PLXNA4	APP	PLXNA4	Signaling by Amyloid-beta precursor protein	0	0	0.3266	4.466	AD	sig	Monocyte	Macrophage
CPI-SS0CB6F5575	APP_PLXNA4	APP	PLXNA4	Signaling by Amyloid-beta precursor protein	0	0	0.3209	3.254	AD	sig	Monocyte	Monocyte
CPI-SS0CB6F5575	APP_PLXNA4	APP	PLXNA4	Signaling by Amyloid-beta precursor protein	0	0	0.3449	8.307	AD	sig	Monocyte	Proliferation
CPI-SS0CB6F5575	APP_PLXNA4	APP	PLXNA4	Signaling by Amyloid-beta precursor protein	0	0	0.3133	1.665	AD	sig	Monocyte	Tau Microglia
CPI-SS0DF830287	APLP2_PLXNA4	APLP2	PLXNA4	Signaling by Amyloid-like protein	0	0	0.3282	5.49	AD	sig	Homeostasis 1	DAM1
CPI-SS0DF830287	APLP2_PLXNA4	APLP2	PLXNA4	Signaling by Amyloid-like protein	0	0	0.3601	20.785	AD	sig	Homeostasis 1	Homeostasis 1
CPI-SS0DF830287	APLP2_PLXNA4	APLP2	PLXNA4	Signaling by Amyloid-like protein	0	0	0.331	6.861	AD	sig	Homeostasis 1	Homeostasis 2
CPI-SS0DF830287	APLP2_PLXNA4	APLP2	PLXNA4	Signaling by Amyloid-like protein	0	0	0.3167	0	AD	sig	Homeostasis 1	Inflammation
CPI-SS0DF830287	APLP2_PLXNA4	APLP2	PLXNA4	Signaling by Amyloid-like protein	0	0	0.3462	14.115	AD	sig	Homeostasis 1	T cell
CPI-SS0DF830287	APLP2_PLXNA4	APLP2	PLXNA4	Signaling by Amyloid-like protein	0	0	0.3488	15.372	AD	sig	Homeostasis 1	MHC 1
CPI-SS0DF830287	APLP2_PLXNA4	APLP2	PLXNA4	Signaling by Amyloid-like protein	0.0001	0.0012	0.3403	11.292	AD	sig	Homeostasis 1	MHC 2
CPI-SS0DF830287	APLP2_PLXNA4	APLP2	PLXNA4	Signaling by Amyloid-like protein	0	0	0.3379	10.161	AD	sig	Homeostasis 1	Macrophage
CPI-SS0DF830287	APLP2_PLXNA4	APLP2	PLXNA4	Signaling by Amyloid-like protein	0	0	0.3322	7.402	AD	sig	Homeostasis 1	Monocyte
CPI-SS0DF830287	APLP2_PLXNA4	APLP2	PLXNA4	Signaling by Amyloid-like protein	0	0	0.3562	18.9	AD	sig	Homeostasis 1	Proliferation
CPI-SS0DF830287	APLP2_PLXNA4	APLP2	PLXNA4	Signaling by Amyloid-like protein	0	0	0.3246	3.788	AD	sig	Homeostasis 1	Tau Microglia
CPI-SS0DF830287	APLP2_PLXNA4	APLP2	PLXNA4	Signaling by Amyloid-like protein	0	0	0.3282	5.489	AD	sig	MHC 1	DAM1
CPI-SS0DF830287	APLP2_PLXNA4	APLP2	PLXNA4	Signaling by Amyloid-like protein	0	0	0.3601	20.783	AD	sig	MHC 1	Homeostasis 1
CPI-SS0DF830287	APLP2_PLXNA4	APLP2	PLXNA4	Signaling by Amyloid-like protein	0	0	0.331	6.86	AD	sig	MHC 1	Homeostasis 2
CPI-SS0DF830287	APLP2_PLXNA4	APLP2	PLXNA4	Signaling by Amyloid-like protein	0	0	0.3167	0	AD	sig	MHC 1	Inflammation
CPI-SS0DF830287	APLP2_PLXNA4	APLP2	PLXNA4	Signaling by Amyloid-like protein	0	0	0.3462	14.113	AD	sig	MHC 1	T cell
CPI-SS0DF830287	APLP2_PLXNA4	APLP2	PLXNA4	Signaling by Amyloid-like protein	0	0	0.3488	15.37	AD	sig	MHC 1	MHC 1
CPI-SS0DF830287	APLP2_PLXNA4	APLP2	PLXNA4	Signaling by Amyloid-like protein	0.0003	0.0035	0.3403	11.291	AD	sig	MHC 1	MHC 2
CPI-SS0DF830287	APLP2_PLXNA4	APLP2	PLXNA4	Signaling by Amyloid-like protein	0	0	0.3379	10.16	AD	sig	MHC 1	Macrophage
CPI-SS0DF830287	APLP2_PLXNA4	APLP2	PLXNA4	Signaling by Amyloid-like protein	0	0	0.3321	7.401	AD	sig	MHC 1	Monocyte
CPI-SS0DF830287	APLP2_PLXNA4	APLP2	PLXNA4	Signaling by Amyloid-like protein	0	0	0.3562	18.897	AD	sig	MHC 1	Proliferation
CPI-SS0DF830287	APLP2_PLXNA4	APLP2	PLXNA4	Signaling by Amyloid-like protein	0	0	0.3246	3.787	AD	sig	MHC 1	Tau Microglia
CPI-SS0DF830287	APLP2_PLXNA4	APLP2	PLXNA4	Signaling by Amyloid-like protein	0.0008	0.009	0.3675	6.489	AD	sig	MHC 2	DAM1
CPI-SS0DF830287	APLP2_PLXNA4	APLP2	PLXNA4	Signaling by Amyloid-like protein	0	0	0.3995	24.569	AD	sig	MHC 2	Homeostasis 1
CPI-SS0DF830287	APLP2_PLXNA4	APLP2	PLXNA4	Signaling by Amyloid-like protein	0.0007	0.0079	0.3704	8.11	AD	sig	MHC 2	Homeostasis 2
CPI-SS0DF830287	APLP2_PLXNA4	APLP2	PLXNA4	Signaling by Amyloid-like protein	0.0046	0.0469	0.3561	0	AD	sig	MHC 2	Inflammation
CPI-SS0DF830287	APLP2_PLXNA4	APLP2	PLXNA4	Signaling by Amyloid-like protein	0	0	0.3855	16.684	AD	sig	MHC 2	T cell
CPI-SS0DF830287	APLP2_PLXNA4	APLP2	PLXNA4	Signaling by Amyloid-like protein	0	0	0.3882	18.171	AD	sig	MHC 2	MHC 1
CPI-SS0DF830287	APLP2_PLXNA4	APLP2	PLXNA4	Signaling by Amyloid-like protein	0.0002	0.0024	0.3796	13.348	AD	sig	MHC 2	MHC 2
CPI-SS0DF830287	APLP2_PLXNA4	APLP2	PLXNA4	Signaling by Amyloid-like protein	0	0	0.3773	12.011	AD	sig	MHC 2	Macrophage
CPI-SS0DF830287	APLP2_PLXNA4	APLP2	PLXNA4	Signaling by Amyloid-like protein	0.0006	0.0068	0.3715	8.749	AD	sig	MHC 2	Monocyte
CPI-SS0DF830287	APLP2_PLXNA4	APLP2	PLXNA4	Signaling by Amyloid-like protein	0	0	0.3955	22.34	AD	sig	MHC 2	Proliferation
CPI-SS0DF830287	APLP2_PLXNA4	APLP2	PLXNA4	Signaling by Amyloid-like protein	0.0012	0.0132	0.364	4.477	AD	sig	MHC 2	Tau Microglia
CPI-SS0DF830287	APLP2_PLXNA4	APLP2	PLXNA4	Signaling by Amyloid-like protein	0.0034	0.0352	0.3105	5.039	AD	sig	Macrophage	DAM1
CPI-SS0DF830287	APLP2_PLXNA4	APLP2	PLXNA4	Signaling by Amyloid-like protein	0	0	0.3424	19.081	AD	sig	Macrophage	Homeostasis 1
CPI-SS0DF830287	APLP2_PLXNA4	APLP2	PLXNA4	Signaling by Amyloid-like protein	0	0	0.3285	12.957	AD	sig	Macrophage	T cell
CPI-SS0DF830287	APLP2_PLXNA4	APLP2	PLXNA4	Signaling by Amyloid-like protein	0	0	0.3311	14.112	AD	sig	Macrophage	MHC 1
CPI-SS0DF830287	APLP2_PLXNA4	APLP2	PLXNA4	Signaling by Amyloid-like protein	0	0	0.3202	9.328	AD	sig	Macrophage	Macrophage
CPI-SS0DF830287	APLP2_PLXNA4	APLP2	PLXNA4	Signaling by Amyloid-like protein	0	0	0.3385	17.35	AD	sig	Macrophage	Proliferation
CPI-SS0DF830287	APLP2_PLXNA4	APLP2	PLXNA4	Signaling by Amyloid-like protein	0	0	0.4628	8.909	AD	sig	Monocyte	DAM1
CPI-SS0DF830287	APLP2_PLXNA4	APLP2	PLXNA4	Signaling by Amyloid-like protein	0	0	0.4948	33.733	AD	sig	Monocyte	Homeostasis 1
CPI-SS0DF830287	APLP2_PLXNA4	APLP2	PLXNA4	Signaling by Amyloid-like protein	0	0	0.4657	11.135	AD	sig	Monocyte	Homeostasis 2
CPI-SS0DF830287	APLP2_PLXNA4	APLP2	PLXNA4	Signaling by Amyloid-like protein	0	0	0.4514	0	AD	sig	Monocyte	Inflammation
CPI-SS0DF830287	APLP2_PLXNA4	APLP2	PLXNA4	Signaling by Amyloid-like protein	0	0	0.4808	22.907	AD	sig	Monocyte	T cell
CPI-SS0DF830287	APLP2_PLXNA4	APLP2	PLXNA4	Signaling by Amyloid-like protein	0	0	0.4835	24.948	AD	sig	Monocyte	MHC 1
CPI-SS0DF830287	APLP2_PLXNA4	APLP2	PLXNA4	Signaling by Amyloid-like protein	0	0	0.4749	18.326	AD	sig	Monocyte	MHC 2
CPI-SS0DF830287	APLP2_PLXNA4	APLP2	PLXNA4	Signaling by Amyloid-like protein	0	0	0.4726	16.491	AD	sig	Monocyte	Macrophage
CPI-SS0DF830287	APLP2_PLXNA4	APLP2	PLXNA4	Signaling by Amyloid-like protein	0	0	0.4668	12.013	AD	sig	Monocyte	Monocyte
CPI-SS0DF830287	APLP2_PLXNA4	APLP2	PLXNA4	Signaling by Amyloid-like protein	0	0	0.4908	30.673	AD	sig	Monocyte	Proliferation
CPI-SS0DF830287	APLP2_PLXNA4	APLP2	PLXNA4	Signaling by Amyloid-like protein	0	0	0.4593	6.147	AD	sig	Monocyte	Tau Microglia
CPI-SS0DF830287	APLP2_PLXNA4	APLP2	PLXNA4	Signaling by Amyloid-like protein	0	0	0.4238	7.919	AD	sig	Proliferation	DAM1
CPI-SS0DF830287	APLP2_PLXNA4	APLP2	PLXNA4	Signaling by Amyloid-like protein	0	0	0.4558	29.983	AD	sig	Proliferation	Homeostasis 1
CPI-SS0DF830287	APLP2_PLXNA4	APLP2	PLXNA4	Signaling by Amyloid-like protein	0	0	0.4267	9.897	AD	sig	Proliferation	Homeostasis 2
CPI-SS0DF830287	APLP2_PLXNA4	APLP2	PLXNA4	Signaling by Amyloid-like protein	0	0	0.4124	0	AD	sig	Proliferation	Inflammation
CPI-SS0DF830287	APLP2_PLXNA4	APLP2	PLXNA4	Signaling by Amyloid-like protein	0	0	0.4418	20.361	AD	sig	Proliferation	T cell
CPI-SS0DF830287	APLP2_PLXNA4	APLP2	PLXNA4	Signaling by Amyloid-like protein	0	0	0.4445	22.175	AD	sig	Proliferation	MHC 1
CPI-SS0DF830287	APLP2_PLXNA4	APLP2	PLXNA4	Signaling by Amyloid-like protein	0	0	0.4359	16.29	AD	sig	Proliferation	MHC 2
CPI-SS0DF830287	APLP2_PLXNA4	APLP2	PLXNA4	Signaling by Amyloid-like protein	0	0	0.4336	14.658	AD	sig	Proliferation	Macrophage
CPI-SS0DF830287	APLP2_PLXNA4	APLP2	PLXNA4	Signaling by Amyloid-like protein	0	0	0.4278	10.678	AD	sig	Proliferation	Monocyte
CPI-SS0DF830287	APLP2_PLXNA4	APLP2	PLXNA4	Signaling by Amyloid-like protein	0	0	0.4518	27.264	AD	sig	Proliferation	Proliferation
CPI-SS0DF830287	APLP2_PLXNA4	APLP2	PLXNA4	Signaling by Amyloid-like protein	0	0	0.4203	5.464	AD	sig	Proliferation	Tau Microglia
CPI-SS07ACDDCD6	APP_SORL1	APP	SORL1	Signaling by Amyloid-beta precursor protein	0	0	1.4769	7.847	AD	sig	DAM1	DAM1
CPI-SS07ACDDCD6	APP_SORL1	APP	SORL1	Signaling by Amyloid-beta precursor protein	0	0	1.6315	9.075	AD	sig	DAM1	Homeostasis 2
CPI-SS07ACDDCD6	APP_SORL1	APP	SORL1	Signaling by Amyloid-beta precursor protein	0	0	1.6014	8.835	AD	sig	DAM1	Tau Microglia
CPI-SS07ACDDCD6	APP_SORL1	APP	SORL1	Signaling by Amyloid-beta precursor protein	0	0	1.5712	18.079	AD	sig	Homeostasis 1	DAM1
CPI-SS07ACDDCD6	APP_SORL1	APP	SORL1	Signaling by Amyloid-beta precursor protein	0	0	1.7257	20.907	AD	sig	Homeostasis 1	Homeostasis 2
CPI-SS07ACDDCD6	APP_SORL1	APP	SORL1	Signaling by Amyloid-beta precursor protein	0	0	1.4873	16.544	AD	sig	Homeostasis 1	MHC 1
CPI-SS07ACDDCD6	APP_SORL1	APP	SORL1	Signaling by Amyloid-beta precursor protein	0.0039	0.0401	1.4891	16.576	AD	sig	Homeostasis 1	MHC 2
CPI-SS07ACDDCD6	APP_SORL1	APP	SORL1	Signaling by Amyloid-beta precursor protein	0	0	1.6956	20.356	AD	sig	Homeostasis 1	Tau Microglia
CPI-SS07ACDDCD6	APP_SORL1	APP	SORL1	Signaling by Amyloid-beta precursor protein	0	0	1.4829	8.489	AD	sig	Homeostasis 2	DAM1
CPI-SS07ACDDCD6	APP_SORL1	APP	SORL1	Signaling by Amyloid-beta precursor protein	0	0	1.6374	9.817	AD	sig	Homeostasis 2	Homeostasis 2
CPI-SS07ACDDCD6	APP_SORL1	APP	SORL1	Signaling by Amyloid-beta precursor protein	0	0	1.6073	9.558	AD	sig	Homeostasis 2	Tau Microglia
CPI-SS07ACDDCD6	APP_SORL1	APP	SORL1	Signaling by Amyloid-beta precursor protein	0	0	1.4627	6.302	AD	sig	Inflammation	DAM1
CPI-SS07ACDDCD6	APP_SORL1	APP	SORL1	Signaling by Amyloid-beta precursor protein	0	0	1.6172	7.288	AD	sig	Inflammation	Homeostasis 2
CPI-SS07ACDDCD6	APP_SORL1	APP	SORL1	Signaling by Amyloid-beta precursor protein	0	0	1.5871	7.096	AD	sig	Inflammation	Tau Microglia
CPI-SS07ACDDCD6	APP_SORL1	APP	SORL1	Signaling by Amyloid-beta precursor protein	0	0	1.5592	0	AD	sig	T cell	Homeostasis 2
CPI-SS07ACDDCD6	APP_SORL1	APP	SORL1	Signaling by Amyloid-beta precursor protein	0	0	1.5291	0	AD	sig	T cell	Tau Microglia
CPI-SS07ACDDCD6	APP_SORL1	APP	SORL1	Signaling by Amyloid-beta precursor protein	0	0	1.5616	17.045	AD	sig	MHC 1	DAM1
CPI-SS07ACDDCD6	APP_SORL1	APP	SORL1	Signaling by Amyloid-beta precursor protein	0	0	1.7162	19.711	AD	sig	MHC 1	Homeostasis 2
CPI-SS07ACDDCD6	APP_SORL1	APP	SORL1	Signaling by Amyloid-beta precursor protein	0	0	1.4778	15.597	AD	sig	MHC 1	MHC 1
CPI-SS07ACDDCD6	APP_SORL1	APP	SORL1	Signaling by Amyloid-beta precursor protein	0	0	1.686	19.192	AD	sig	MHC 1	Tau Microglia
CPI-SS07ACDDCD6	APP_SORL1	APP	SORL1	Signaling by Amyloid-beta precursor protein	0	0	1.5131	11.774	AD	sig	MHC 2	DAM1
CPI-SS07ACDDCD6	APP_SORL1	APP	SORL1	Signaling by Amyloid-beta precursor protein	0	0	1.6676	13.616	AD	sig	MHC 2	Homeostasis 2
CPI-SS07ACDDCD6	APP_SORL1	APP	SORL1	Signaling by Amyloid-beta precursor protein	0	0	1.6375	13.257	AD	sig	MHC 2	Tau Microglia
CPI-SS07ACDDCD6	APP_SORL1	APP	SORL1	Signaling by Amyloid-beta precursor protein	0	0	1.5889	20.002	AD	sig	Macrophage	DAM1
CPI-SS07ACDDCD6	APP_SORL1	APP	SORL1	Signaling by Amyloid-beta precursor protein	0	0	1.7434	23.131	AD	sig	Macrophage	Homeostasis 2
CPI-SS07ACDDCD6	APP_SORL1	APP	SORL1	Signaling by Amyloid-beta precursor protein	0	0	1.505	18.303	AD	sig	Macrophage	MHC 1
CPI-SS07ACDDCD6	APP_SORL1	APP	SORL1	Signaling by Amyloid-beta precursor protein	0.0008	0.009	1.5068	18.339	AD	sig	Macrophage	MHC 2
CPI-SS07ACDDCD6	APP_SORL1	APP	SORL1	Signaling by Amyloid-beta precursor protein	0	0	1.7133	22.521	AD	sig	Macrophage	Tau Microglia
CPI-SS07ACDDCD6	APP_SORL1	APP	SORL1	Signaling by Amyloid-beta precursor protein	0	0	1.5956	20.732	AD	sig	Monocyte	DAM1
CPI-SS07ACDDCD6	APP_SORL1	APP	SORL1	Signaling by Amyloid-beta precursor protein	0	0	1.7501	23.975	AD	sig	Monocyte	Homeostasis 2
CPI-SS07ACDDCD6	APP_SORL1	APP	SORL1	Signaling by Amyloid-beta precursor protein	0	0	1.5117	18.971	AD	sig	Monocyte	MHC 1
CPI-SS07ACDDCD6	APP_SORL1	APP	SORL1	Signaling by Amyloid-beta precursor protein	0.0004	0.0046	1.5135	19.008	AD	sig	Monocyte	MHC 2
CPI-SS07ACDDCD6	APP_SORL1	APP	SORL1	Signaling by Amyloid-beta precursor protein	0	0	1.72	23.343	AD	sig	Monocyte	Tau Microglia
CPI-SS07ACDDCD6	APP_SORL1	APP	SORL1	Signaling by Amyloid-beta precursor protein	0	0	1.5154	12.026	AD	sig	Proliferation	DAM1
CPI-SS07ACDDCD6	APP_SORL1	APP	SORL1	Signaling by Amyloid-beta precursor protein	0	0	1.6699	13.908	AD	sig	Proliferation	Homeostasis 2
CPI-SS07ACDDCD6	APP_SORL1	APP	SORL1	Signaling by Amyloid-beta precursor protein	0	0	1.6398	13.541	AD	sig	Proliferation	Tau Microglia
CPI-SS07ACDDCD6	APP_SORL1	APP	SORL1	Signaling by Amyloid-beta precursor protein	0	0	1.444	4.273	AD	sig	Tau Microglia	DAM1
CPI-SS07ACDDCD6	APP_SORL1	APP	SORL1	Signaling by Amyloid-beta precursor protein	0	0	1.5986	4.941	AD	sig	Tau Microglia	Homeostasis 2
CPI-SS07ACDDCD6	APP_SORL1	APP	SORL1	Signaling by Amyloid-beta precursor protein	0	0	1.5684	4.811	AD	sig	Tau Microglia	Tau Microglia
CPI-SS097A84265	APP_TNFRSF21	APP	TNFRSF21	Signaling by Amyloid-beta precursor protein	0	0	0.2793	1.404	AD	sig	Homeostasis 1	DAM1
CPI-SS097A84265	APP_TNFRSF21	APP	TNFRSF21	Signaling by Amyloid-beta precursor protein	0	0	0.2847	2.092	AD	sig	Homeostasis 1	Homeostasis 1
CPI-SS097A84265	APP_TNFRSF21	APP	TNFRSF21	Signaling by Amyloid-beta precursor protein	0	0	0.2805	1.559	AD	sig	Homeostasis 1	Homeostasis 2
CPI-SS097A84265	APP_TNFRSF21	APP	TNFRSF21	Signaling by Amyloid-beta precursor protein	0	0	0.2871	2.391	AD	sig	Homeostasis 1	MHC 1
CPI-SS097A84265	APP_TNFRSF21	APP	TNFRSF21	Signaling by Amyloid-beta precursor protein	0	0	0.2886	2.582	AD	sig	Homeostasis 1	MHC 2
CPI-SS097A84265	APP_TNFRSF21	APP	TNFRSF21	Signaling by Amyloid-beta precursor protein	0	0	0.305	4.656	AD	sig	Homeostasis 1	Macrophage
CPI-SS097A84265	APP_TNFRSF21	APP	TNFRSF21	Signaling by Amyloid-beta precursor protein	0	0	0.3082	5.06	AD	sig	Homeostasis 1	Monocyte
CPI-SS097A84265	APP_TNFRSF21	APP	TNFRSF21	Signaling by Amyloid-beta precursor protein	0	0	0.2855	2.195	AD	sig	Homeostasis 1	Proliferation
CPI-SS097A84265	APP_TNFRSF21	APP	TNFRSF21	Signaling by Amyloid-beta precursor protein	0	0	0.2908	2.861	AD	sig	Homeostasis 1	Tau Microglia
CPI-SS097A84265	APP_TNFRSF21	APP	TNFRSF21	Signaling by Amyloid-beta precursor protein	0	0	0.2697	1.324	AD	sig	MHC 1	DAM1
CPI-SS097A84265	APP_TNFRSF21	APP	TNFRSF21	Signaling by Amyloid-beta precursor protein	0	0	0.2752	1.972	AD	sig	MHC 1	Homeostasis 1
CPI-SS097A84265	APP_TNFRSF21	APP	TNFRSF21	Signaling by Amyloid-beta precursor protein	0	0	0.271	1.47	AD	sig	MHC 1	Homeostasis 2
CPI-SS097A84265	APP_TNFRSF21	APP	TNFRSF21	Signaling by Amyloid-beta precursor protein	0	0	0.2775	2.254	AD	sig	MHC 1	MHC 1
CPI-SS097A84265	APP_TNFRSF21	APP	TNFRSF21	Signaling by Amyloid-beta precursor protein	0	0	0.279	2.434	AD	sig	MHC 1	MHC 2
CPI-SS097A84265	APP_TNFRSF21	APP	TNFRSF21	Signaling by Amyloid-beta precursor protein	0	0	0.2955	4.39	AD	sig	MHC 1	Macrophage
CPI-SS097A84265	APP_TNFRSF21	APP	TNFRSF21	Signaling by Amyloid-beta precursor protein	0	0	0.2987	4.771	AD	sig	MHC 1	Monocyte
CPI-SS097A84265	APP_TNFRSF21	APP	TNFRSF21	Signaling by Amyloid-beta precursor protein	0	0	0.276	2.069	AD	sig	MHC 1	Proliferation
CPI-SS097A84265	APP_TNFRSF21	APP	TNFRSF21	Signaling by Amyloid-beta precursor protein	0	0	0.2813	2.698	AD	sig	MHC 1	Tau Microglia
CPI-SS097A84265	APP_TNFRSF21	APP	TNFRSF21	Signaling by Amyloid-beta precursor protein	0	0	0.297	1.554	AD	sig	Macrophage	DAM1
CPI-SS097A84265	APP_TNFRSF21	APP	TNFRSF21	Signaling by Amyloid-beta precursor protein	0	0	0.3024	2.314	AD	sig	Macrophage	Homeostasis 1
CPI-SS097A84265	APP_TNFRSF21	APP	TNFRSF21	Signaling by Amyloid-beta precursor protein	0	0	0.2982	1.725	AD	sig	Macrophage	Homeostasis 2
CPI-SS097A84265	APP_TNFRSF21	APP	TNFRSF21	Signaling by Amyloid-beta precursor protein	0	0	0.3048	2.645	AD	sig	Macrophage	MHC 1
CPI-SS097A84265	APP_TNFRSF21	APP	TNFRSF21	Signaling by Amyloid-beta precursor protein	0	0	0.3063	2.856	AD	sig	Macrophage	MHC 2
CPI-SS097A84265	APP_TNFRSF21	APP	TNFRSF21	Signaling by Amyloid-beta precursor protein	0	0	0.3227	5.151	AD	sig	Macrophage	Macrophage
CPI-SS097A84265	APP_TNFRSF21	APP	TNFRSF21	Signaling by Amyloid-beta precursor protein	0	0	0.3259	5.598	AD	sig	Macrophage	Monocyte
CPI-SS097A84265	APP_TNFRSF21	APP	TNFRSF21	Signaling by Amyloid-beta precursor protein	0	0	0.3032	2.428	AD	sig	Macrophage	Proliferation
CPI-SS097A84265	APP_TNFRSF21	APP	TNFRSF21	Signaling by Amyloid-beta precursor protein	0	0	0.3085	3.166	AD	sig	Macrophage	Tau Microglia
CPI-SS097A84265	APP_TNFRSF21	APP	TNFRSF21	Signaling by Amyloid-beta precursor protein	0	0	0.3037	1.61	AD	sig	Monocyte	DAM1
CPI-SS097A84265	APP_TNFRSF21	APP	TNFRSF21	Signaling by Amyloid-beta precursor protein	0	0	0.3091	2.398	AD	sig	Monocyte	Homeostasis 1
CPI-SS097A84265	APP_TNFRSF21	APP	TNFRSF21	Signaling by Amyloid-beta precursor protein	0	0	0.3049	1.788	AD	sig	Monocyte	Homeostasis 2
CPI-SS097A84265	APP_TNFRSF21	APP	TNFRSF21	Signaling by Amyloid-beta precursor protein	0	0	0.3115	2.741	AD	sig	Monocyte	MHC 1
CPI-SS097A84265	APP_TNFRSF21	APP	TNFRSF21	Signaling by Amyloid-beta precursor protein	0	0	0.313	2.96	AD	sig	Monocyte	MHC 2
CPI-SS097A84265	APP_TNFRSF21	APP	TNFRSF21	Signaling by Amyloid-beta precursor protein	0	0	0.3294	5.339	AD	sig	Monocyte	Macrophage
CPI-SS097A84265	APP_TNFRSF21	APP	TNFRSF21	Signaling by Amyloid-beta precursor protein	0	0	0.3326	5.803	AD	sig	Monocyte	Monocyte
CPI-SS097A84265	APP_TNFRSF21	APP	TNFRSF21	Signaling by Amyloid-beta precursor protein	0	0	0.3099	2.517	AD	sig	Monocyte	Proliferation
CPI-SS097A84265	APP_TNFRSF21	APP	TNFRSF21	Signaling by Amyloid-beta precursor protein	0	0	0.3152	3.281	AD	sig	Monocyte	Tau Microglia
CPI-SS097A84265	APP_TNFRSF21	APP	TNFRSF21	Signaling by Amyloid-beta precursor protein	0.0025	0.0264	0.2525	3.366	AD	sig	Proliferation	Monocyte
CPI-SC0E89A4EF0	APP_TREM2_receptor	APP		Signaling by Amyloid-beta precursor protein	0	0	0.4178	9.075	AD	sig	DAM1	MHC 2
CPI-SC0E89A4EF0	APP_TREM2_receptor	APP		Signaling by Amyloid-beta precursor protein	0	0	0.3678	8.089	AD	sig	Homeostasis 1	DAM1
CPI-SC0E89A4EF0	APP_TREM2_receptor	APP		Signaling by Amyloid-beta precursor protein	0	0	0.3726	9.379	AD	sig	Homeostasis 1	Homeostasis 1
CPI-SC0E89A4EF0	APP_TREM2_receptor	APP		Signaling by Amyloid-beta precursor protein	0	0	0.3974	11.493	AD	sig	Homeostasis 1	Homeostasis 2
CPI-SC0E89A4EF0	APP_TREM2_receptor	APP		Signaling by Amyloid-beta precursor protein	0.0001	0.0012	0.308	4.129	AD	sig	Homeostasis 1	Inflammation
CPI-SC0E89A4EF0	APP_TREM2_receptor	APP		Signaling by Amyloid-beta precursor protein	0	0	0.3622	9.935	AD	sig	Homeostasis 1	MHC 1
CPI-SC0E89A4EF0	APP_TREM2_receptor	APP		Signaling by Amyloid-beta precursor protein	0	0	0.512	20.907	AD	sig	Homeostasis 1	MHC 2
CPI-SC0E89A4EF0	APP_TREM2_receptor	APP		Signaling by Amyloid-beta precursor protein	0	0	0.3227	6.216	AD	sig	Homeostasis 1	Proliferation
CPI-SC0E89A4EF0	APP_TREM2_receptor	APP		Signaling by Amyloid-beta precursor protein	0	0	0.3297	5.794	AD	sig	Homeostasis 1	Tau Microglia
CPI-SC0E89A4EF0	APP_TREM2_receptor	APP		Signaling by Amyloid-beta precursor protein	0	0	0.4237	9.817	AD	sig	Homeostasis 2	MHC 2
CPI-SC0E89A4EF0	APP_TREM2_receptor	APP		Signaling by Amyloid-beta precursor protein	0	0	0.4035	7.288	AD	sig	Inflammation	MHC 2
CPI-SC0E89A4EF0	APP_TREM2_receptor	APP		Signaling by Amyloid-beta precursor protein	0.0001	0.0012	0.3455	0	AD	sig	T cell	MHC 2
CPI-SC0E89A4EF0	APP_TREM2_receptor	APP		Signaling by Amyloid-beta precursor protein	0	0	0.3583	7.626	AD	sig	MHC 1	DAM1
CPI-SC0E89A4EF0	APP_TREM2_receptor	APP		Signaling by Amyloid-beta precursor protein	0	0	0.363	8.842	AD	sig	MHC 1	Homeostasis 1
CPI-SC0E89A4EF0	APP_TREM2_receptor	APP		Signaling by Amyloid-beta precursor protein	0	0	0.3879	10.835	AD	sig	MHC 1	Homeostasis 2
CPI-SC0E89A4EF0	APP_TREM2_receptor	APP		Signaling by Amyloid-beta precursor protein	0	0	0.3527	9.367	AD	sig	MHC 1	MHC 1
CPI-SC0E89A4EF0	APP_TREM2_receptor	APP		Signaling by Amyloid-beta precursor protein	0	0	0.5025	19.711	AD	sig	MHC 1	MHC 2
CPI-SC0E89A4EF0	APP_TREM2_receptor	APP		Signaling by Amyloid-beta precursor protein	0.0022	0.0234	0.3132	5.861	AD	sig	MHC 1	Proliferation
CPI-SC0E89A4EF0	APP_TREM2_receptor	APP		Signaling by Amyloid-beta precursor protein	0	0	0.3202	5.462	AD	sig	MHC 1	Tau Microglia
CPI-SC0E89A4EF0	APP_TREM2_receptor	APP		Signaling by Amyloid-beta precursor protein	0	0	0.4539	13.616	AD	sig	MHC 2	MHC 2
CPI-SC0E89A4EF0	APP_TREM2_receptor	APP		Signaling by Amyloid-beta precursor protein	0	0	0.3855	8.949	AD	sig	Macrophage	DAM1
CPI-SC0E89A4EF0	APP_TREM2_receptor	APP		Signaling by Amyloid-beta precursor protein	0	0	0.3903	10.376	AD	sig	Macrophage	Homeostasis 1
CPI-SC0E89A4EF0	APP_TREM2_receptor	APP		Signaling by Amyloid-beta precursor protein	0	0	0.4151	12.715	AD	sig	Macrophage	Homeostasis 2
CPI-SC0E89A4EF0	APP_TREM2_receptor	APP		Signaling by Amyloid-beta precursor protein	0	0	0.3258	4.568	AD	sig	Macrophage	Inflammation
CPI-SC0E89A4EF0	APP_TREM2_receptor	APP		Signaling by Amyloid-beta precursor protein	0	0	0.3799	10.992	AD	sig	Macrophage	MHC 1
CPI-SC0E89A4EF0	APP_TREM2_receptor	APP		Signaling by Amyloid-beta precursor protein	0	0	0.5297	23.131	AD	sig	Macrophage	MHC 2
CPI-SC0E89A4EF0	APP_TREM2_receptor	APP		Signaling by Amyloid-beta precursor protein	0	0	0.3404	6.877	AD	sig	Macrophage	Proliferation
CPI-SC0E89A4EF0	APP_TREM2_receptor	APP		Signaling by Amyloid-beta precursor protein	0	0	0.3474	6.41	AD	sig	Macrophage	Tau Microglia
CPI-SC0E89A4EF0	APP_TREM2_receptor	APP		Signaling by Amyloid-beta precursor protein	0	0	0.3922	9.276	AD	sig	Monocyte	DAM1
CPI-SC0E89A4EF0	APP_TREM2_receptor	APP		Signaling by Amyloid-beta precursor protein	0	0	0.397	10.755	AD	sig	Monocyte	Homeostasis 1
CPI-SC0E89A4EF0	APP_TREM2_receptor	APP		Signaling by Amyloid-beta precursor protein	0	0	0.4219	13.179	AD	sig	Monocyte	Homeostasis 2
CPI-SC0E89A4EF0	APP_TREM2_receptor	APP		Signaling by Amyloid-beta precursor protein	0.0001	0.0012	0.3325	4.735	AD	sig	Monocyte	Inflammation
CPI-SC0E89A4EF0	APP_TREM2_receptor	APP		Signaling by Amyloid-beta precursor protein	0	0	0.3866	11.393	AD	sig	Monocyte	MHC 1
CPI-SC0E89A4EF0	APP_TREM2_receptor	APP		Signaling by Amyloid-beta precursor protein	0	0	0.5364	23.975	AD	sig	Monocyte	MHC 2
CPI-SC0E89A4EF0	APP_TREM2_receptor	APP		Signaling by Amyloid-beta precursor protein	0	0	0.3472	7.128	AD	sig	Monocyte	Proliferation
CPI-SC0E89A4EF0	APP_TREM2_receptor	APP		Signaling by Amyloid-beta precursor protein	0	0	0.3542	6.644	AD	sig	Monocyte	Tau Microglia
CPI-SC0E89A4EF0	APP_TREM2_receptor	APP		Signaling by Amyloid-beta precursor protein	0	0	0.3417	7.645	AD	sig	Proliferation	Homeostasis 2
CPI-SC0E89A4EF0	APP_TREM2_receptor	APP		Signaling by Amyloid-beta precursor protein	0	0	0.4562	13.908	AD	sig	Proliferation	MHC 2
CPI-SC0E89A4EF0	APP_TREM2_receptor	APP		Signaling by Amyloid-beta precursor protein	0	0	0.3849	4.941	AD	sig	Tau Microglia	MHC 2
CPI-SC06C75F978	APOE_TREM2_receptor	APOE		Signaling by Apolipoprotein	0.0001	0.0012	0.5062	13.96	AD	sig	DAM1	Homeostasis 2
CPI-SC06C75F978	APOE_TREM2_receptor	APOE		Signaling by Apolipoprotein	0	0	0.6207	25.396	AD	sig	DAM1	MHC 2
CPI-SC06C75F978	APOE_TREM2_receptor	APOE		Signaling by Apolipoprotein	0	0	0.5812	13.262	AD	sig	Homeostasis 1	DAM1
CPI-SC06C75F978	APOE_TREM2_receptor	APOE		Signaling by Apolipoprotein	0	0	0.586	15.377	AD	sig	Homeostasis 1	Homeostasis 1
CPI-SC06C75F978	APOE_TREM2_receptor	APOE		Signaling by Apolipoprotein	0	0	0.6109	18.843	AD	sig	Homeostasis 1	Homeostasis 2
CPI-SC06C75F978	APOE_TREM2_receptor	APOE		Signaling by Apolipoprotein	0	0	0.5215	6.769	AD	sig	Homeostasis 1	Inflammation
CPI-SC06C75F978	APOE_TREM2_receptor	APOE		Signaling by Apolipoprotein	0	0	0.5756	16.289	AD	sig	Homeostasis 1	MHC 1
CPI-SC06C75F978	APOE_TREM2_receptor	APOE		Signaling by Apolipoprotein	0	0	0.7254	34.279	AD	sig	Homeostasis 1	MHC 2
CPI-SC06C75F978	APOE_TREM2_receptor	APOE		Signaling by Apolipoprotein	0	0	0.5026	5.526	AD	sig	Homeostasis 1	Macrophage
CPI-SC06C75F978	APOE_TREM2_receptor	APOE		Signaling by Apolipoprotein	0	0	0.5362	10.192	AD	sig	Homeostasis 1	Proliferation
CPI-SC06C75F978	APOE_TREM2_receptor	APOE		Signaling by Apolipoprotein	0	0	0.5432	9.499	AD	sig	Homeostasis 1	Tau Microglia
CPI-SC06C75F978	APOE_TREM2_receptor	APOE		Signaling by Apolipoprotein	0	0	0.5914	13.595	AD	sig	Homeostasis 2	DAM1
CPI-SC06C75F978	APOE_TREM2_receptor	APOE		Signaling by Apolipoprotein	0	0	0.5961	15.762	AD	sig	Homeostasis 2	Homeostasis 1
CPI-SC06C75F978	APOE_TREM2_receptor	APOE		Signaling by Apolipoprotein	0	0	0.621	19.315	AD	sig	Homeostasis 2	Homeostasis 2
CPI-SC06C75F978	APOE_TREM2_receptor	APOE		Signaling by Apolipoprotein	0	0	0.5316	6.939	AD	sig	Homeostasis 2	Inflammation
CPI-SC06C75F978	APOE_TREM2_receptor	APOE		Signaling by Apolipoprotein	0	0	0.5857	16.697	AD	sig	Homeostasis 2	MHC 1
CPI-SC06C75F978	APOE_TREM2_receptor	APOE		Signaling by Apolipoprotein	0	0	0.7355	35.138	AD	sig	Homeostasis 2	MHC 2
CPI-SC06C75F978	APOE_TREM2_receptor	APOE		Signaling by Apolipoprotein	0.0001	0.0012	0.5463	10.447	AD	sig	Homeostasis 2	Proliferation
CPI-SC06C75F978	APOE_TREM2_receptor	APOE		Signaling by Apolipoprotein	0	0	0.5533	9.737	AD	sig	Homeostasis 2	Tau Microglia
CPI-SC06C75F978	APOE_TREM2_receptor	APOE		Signaling by Apolipoprotein	0	0	0.7113	17.534	AD	sig	MHC 1	DAM1
CPI-SC06C75F978	APOE_TREM2_receptor	APOE		Signaling by Apolipoprotein	0	0	0.7161	20.33	AD	sig	MHC 1	Homeostasis 1
CPI-SC06C75F978	APOE_TREM2_receptor	APOE		Signaling by Apolipoprotein	0	0	0.741	24.913	AD	sig	MHC 1	Homeostasis 2
CPI-SC06C75F978	APOE_TREM2_receptor	APOE		Signaling by Apolipoprotein	0	0	0.6516	8.95	AD	sig	MHC 1	Inflammation
CPI-SC06C75F978	APOE_TREM2_receptor	APOE		Signaling by Apolipoprotein	0	0	0.7057	21.536	AD	sig	MHC 1	MHC 1
CPI-SC06C75F978	APOE_TREM2_receptor	APOE		Signaling by Apolipoprotein	0	0	0.8555	45.321	AD	sig	MHC 1	MHC 2
CPI-SC06C75F978	APOE_TREM2_receptor	APOE		Signaling by Apolipoprotein	0	0	0.6327	7.306	AD	sig	MHC 1	Macrophage
CPI-SC06C75F978	APOE_TREM2_receptor	APOE		Signaling by Apolipoprotein	0	0	0.6663	13.475	AD	sig	MHC 1	Proliferation
CPI-SC06C75F978	APOE_TREM2_receptor	APOE		Signaling by Apolipoprotein	0	0	0.6733	12.559	AD	sig	MHC 1	Tau Microglia
CPI-SC06C75F978	APOE_TREM2_receptor	APOE		Signaling by Apolipoprotein	0	0	1.3556	38.689	AD	sig	MHC 2	DAM1
CPI-SC06C75F978	APOE_TREM2_receptor	APOE		Signaling by Apolipoprotein	0	0	1.3603	44.858	AD	sig	MHC 2	Homeostasis 1
CPI-SC06C75F978	APOE_TREM2_receptor	APOE		Signaling by Apolipoprotein	0	0	1.3852	54.97	AD	sig	MHC 2	Homeostasis 2
CPI-SC06C75F978	APOE_TREM2_receptor	APOE		Signaling by Apolipoprotein	0	0	1.2958	19.748	AD	sig	MHC 2	Inflammation
CPI-SC06C75F978	APOE_TREM2_receptor	APOE		Signaling by Apolipoprotein	0	0	1.35	47.519	AD	sig	MHC 2	MHC 1
CPI-SC06C75F978	APOE_TREM2_receptor	APOE		Signaling by Apolipoprotein	0	0	1.4998	100	AD	sig	MHC 2	MHC 2
CPI-SC06C75F978	APOE_TREM2_receptor	APOE		Signaling by Apolipoprotein	0	0	1.277	16.119	AD	sig	MHC 2	Macrophage
CPI-SC06C75F978	APOE_TREM2_receptor	APOE		Signaling by Apolipoprotein	0	0	1.3105	29.732	AD	sig	MHC 2	Proliferation
CPI-SC06C75F978	APOE_TREM2_receptor	APOE		Signaling by Apolipoprotein	0	0	1.3175	27.711	AD	sig	MHC 2	Tau Microglia
CPI-SC06C75F978	APOE_TREM2_receptor	APOE		Signaling by Apolipoprotein	0	0	0.5939	13.679	AD	sig	Proliferation	DAM1
CPI-SC06C75F978	APOE_TREM2_receptor	APOE		Signaling by Apolipoprotein	0	0	0.5987	15.86	AD	sig	Proliferation	Homeostasis 1
CPI-SC06C75F978	APOE_TREM2_receptor	APOE		Signaling by Apolipoprotein	0	0	0.6235	19.435	AD	sig	Proliferation	Homeostasis 2
CPI-SC06C75F978	APOE_TREM2_receptor	APOE		Signaling by Apolipoprotein	0.0001	0.0012	0.5342	6.982	AD	sig	Proliferation	Inflammation
CPI-SC06C75F978	APOE_TREM2_receptor	APOE		Signaling by Apolipoprotein	0	0	0.5883	16.8	AD	sig	Proliferation	MHC 1
CPI-SC06C75F978	APOE_TREM2_receptor	APOE		Signaling by Apolipoprotein	0	0	0.7381	35.355	AD	sig	Proliferation	MHC 2
CPI-SC06C75F978	APOE_TREM2_receptor	APOE		Signaling by Apolipoprotein	0.0043	0.044	0.5153	5.699	AD	sig	Proliferation	Macrophage
CPI-SC06C75F978	APOE_TREM2_receptor	APOE		Signaling by Apolipoprotein	0	0	0.5488	10.512	AD	sig	Proliferation	Proliferation
CPI-SC06C75F978	APOE_TREM2_receptor	APOE		Signaling by Apolipoprotein	0	0	0.5558	9.797	AD	sig	Proliferation	Tau Microglia
CPI-SC046AFCFE9	CLU_TREM2_receptor	CLU			0	0	0.4275	34.433	AD	sig	DAM1	MHC 2
CPI-SC046AFCFE9	CLU_TREM2_receptor	CLU			0	0	0.4405	24.715	AD	sig	Homeostasis 1	DAM1
CPI-SC046AFCFE9	CLU_TREM2_receptor	CLU			0	0	0.4452	28.656	AD	sig	Homeostasis 1	Homeostasis 1
CPI-SC046AFCFE9	CLU_TREM2_receptor	CLU			0	0	0.4701	35.115	AD	sig	Homeostasis 1	Homeostasis 2
CPI-SC046AFCFE9	CLU_TREM2_receptor	CLU			0	0	0.3807	12.615	AD	sig	Homeostasis 1	Inflammation
CPI-SC046AFCFE9	CLU_TREM2_receptor	CLU			0	0	0.4349	30.356	AD	sig	Homeostasis 1	MHC 1
CPI-SC046AFCFE9	CLU_TREM2_receptor	CLU			0	0	0.5847	63.881	AD	sig	Homeostasis 1	MHC 2
CPI-SC046AFCFE9	CLU_TREM2_receptor	CLU			0	0	0.3619	10.297	AD	sig	Homeostasis 1	Macrophage
CPI-SC046AFCFE9	CLU_TREM2_receptor	CLU			0	0	0.3954	18.993	AD	sig	Homeostasis 1	Proliferation
CPI-SC046AFCFE9	CLU_TREM2_receptor	CLU			0	0	0.4024	17.702	AD	sig	Homeostasis 1	Tau Microglia
CPI-SC046AFCFE9	CLU_TREM2_receptor	CLU			0.0011	0.0121	0.3643	22.574	AD	sig	Homeostasis 2	MHC 2
CPI-SC046AFCFE9	CLU_TREM2_receptor	CLU			0	0	0.4036	29.937	AD	sig	Inflammation	MHC 2
CPI-SC046AFCFE9	CLU_TREM2_receptor	CLU			0	0	0.4195	32.923	AD	sig	T cell	MHC 2
CPI-SC046AFCFE9	CLU_TREM2_receptor	CLU			0	0	0.321	18.209	AD	sig	MHC 1	Homeostasis 1
CPI-SC046AFCFE9	CLU_TREM2_receptor	CLU			0	0	0.3459	22.313	AD	sig	MHC 1	Homeostasis 2
CPI-SC046AFCFE9	CLU_TREM2_receptor	CLU			0	0	0.4604	40.591	AD	sig	MHC 1	MHC 2
CPI-SC046AFCFE9	CLU_TREM2_receptor	CLU			0	0	0.4777	43.842	AD	sig	MHC 2	MHC 2
CPI-SC046AFCFE9	CLU_TREM2_receptor	CLU			0	0	0.3446	22.184	AD	sig	Macrophage	Homeostasis 2
CPI-SC046AFCFE9	CLU_TREM2_receptor	CLU			0	0	0.4592	40.357	AD	sig	Macrophage	MHC 2
CPI-SC046AFCFE9	CLU_TREM2_receptor	CLU			0	0	0.396	21.485	AD	sig	Monocyte	DAM1
CPI-SC046AFCFE9	CLU_TREM2_receptor	CLU			0	0	0.4007	24.911	AD	sig	Monocyte	Homeostasis 1
CPI-SC046AFCFE9	CLU_TREM2_receptor	CLU			0	0	0.4256	30.527	AD	sig	Monocyte	Homeostasis 2
CPI-SC046AFCFE9	CLU_TREM2_receptor	CLU			0	0	0.3903	26.389	AD	sig	Monocyte	MHC 1
CPI-SC046AFCFE9	CLU_TREM2_receptor	CLU			0	0	0.5401	55.533	AD	sig	Monocyte	MHC 2
CPI-SC046AFCFE9	CLU_TREM2_receptor	CLU			0.0004	0.0046	0.3509	16.511	AD	sig	Monocyte	Proliferation
CPI-SC046AFCFE9	CLU_TREM2_receptor	CLU			0	0	0.3579	15.389	AD	sig	Monocyte	Tau Microglia
CPI-SC046AFCFE9	CLU_TREM2_receptor	CLU			0.0005	0.0057	0.3455	17.826	AD	sig	Proliferation	DAM1
CPI-SC046AFCFE9	CLU_TREM2_receptor	CLU			0.0001	0.0012	0.3502	20.669	AD	sig	Proliferation	Homeostasis 1
CPI-SC046AFCFE9	CLU_TREM2_receptor	CLU			0	0	0.3751	25.328	AD	sig	Proliferation	Homeostasis 2
CPI-SC046AFCFE9	CLU_TREM2_receptor	CLU			0.0021	0.0224	0.3399	21.895	AD	sig	Proliferation	MHC 1
CPI-SC046AFCFE9	CLU_TREM2_receptor	CLU			0	0	0.4897	46.076	AD	sig	Proliferation	MHC 2
CPI-SC046AFCFE9	CLU_TREM2_receptor	CLU			0	0	0.4017	29.583	AD	sig	Tau Microglia	MHC 2
CPI-CS09B8977D7	Dehydroepiandrosterone_bySTS_ESR1		ESR1	Signaling by Dehydroepiandrosterone	0	0	0.498	15.464	AD	sig	DAM1	DAM1
CPI-CS09B8977D7	Dehydroepiandrosterone_bySTS_ESR1		ESR1	Signaling by Dehydroepiandrosterone	0.0012	0.0132	0.4689	13.135	AD	sig	DAM1	MHC 1
CPI-CS09B8977D7	Dehydroepiandrosterone_bySTS_ESR1		ESR1	Signaling by Dehydroepiandrosterone	0	0	0.6056	24.093	AD	sig	DAM1	Macrophage
CPI-CS09B8977D7	Dehydroepiandrosterone_bySTS_ESR1		ESR1	Signaling by Dehydroepiandrosterone	0	0	0.5176	18.278	AD	sig	Homeostasis 1	DAM1
CPI-CS09B8977D7	Dehydroepiandrosterone_bySTS_ESR1		ESR1	Signaling by Dehydroepiandrosterone	0	0	0.4886	15.525	AD	sig	Homeostasis 1	MHC 1
CPI-CS09B8977D7	Dehydroepiandrosterone_bySTS_ESR1		ESR1	Signaling by Dehydroepiandrosterone	0	0	0.6252	28.477	AD	sig	Homeostasis 1	Macrophage
CPI-CS09B8977D7	Dehydroepiandrosterone_bySTS_ESR1		ESR1	Signaling by Dehydroepiandrosterone	0	0	0.4972	16.348	AD	sig	Homeostasis 1	Proliferation
CPI-CS09B8977D7	Dehydroepiandrosterone_bySTS_ESR1		ESR1	Signaling by Dehydroepiandrosterone	0	0	0.5639	14.783	AD	sig	Homeostasis 2	Macrophage
CPI-CS09B8977D7	Dehydroepiandrosterone_bySTS_ESR1		ESR1	Signaling by Dehydroepiandrosterone	0	0	0.4989	0.257	AD	sig	Inflammation	Macrophage
CPI-CS09B8977D7	Dehydroepiandrosterone_bySTS_ESR1		ESR1	Signaling by Dehydroepiandrosterone	0	0	0.4977	0	AD	sig	T cell	Macrophage
CPI-CS09B8977D7	Dehydroepiandrosterone_bySTS_ESR1		ESR1	Signaling by Dehydroepiandrosterone	0	0	0.6326	34.766	AD	sig	MHC 1	DAM1
CPI-CS09B8977D7	Dehydroepiandrosterone_bySTS_ESR1		ESR1	Signaling by Dehydroepiandrosterone	0	0	0.559	21.503	AD	sig	MHC 1	Homeostasis 1
CPI-CS09B8977D7	Dehydroepiandrosterone_bySTS_ESR1		ESR1	Signaling by Dehydroepiandrosterone	0	0	0.5585	21.418	AD	sig	MHC 1	Homeostasis 2
CPI-CS09B8977D7	Dehydroepiandrosterone_bySTS_ESR1		ESR1	Signaling by Dehydroepiandrosterone	0	0	0.5393	17.947	AD	sig	MHC 1	Inflammation
CPI-CS09B8977D7	Dehydroepiandrosterone_bySTS_ESR1		ESR1	Signaling by Dehydroepiandrosterone	0	0	0.4798	7.212	AD	sig	MHC 1	T cell
CPI-CS09B8977D7	Dehydroepiandrosterone_bySTS_ESR1		ESR1	Signaling by Dehydroepiandrosterone	0	0	0.6035	29.53	AD	sig	MHC 1	MHC 1
CPI-CS09B8977D7	Dehydroepiandrosterone_bySTS_ESR1		ESR1	Signaling by Dehydroepiandrosterone	0	0	0.5784	24.999	AD	sig	MHC 1	MHC 2
CPI-CS09B8977D7	Dehydroepiandrosterone_bySTS_ESR1		ESR1	Signaling by Dehydroepiandrosterone	0	0	0.7402	54.164	AD	sig	MHC 1	Macrophage
CPI-CS09B8977D7	Dehydroepiandrosterone_bySTS_ESR1		ESR1	Signaling by Dehydroepiandrosterone	0	0	0.6122	31.095	AD	sig	MHC 1	Proliferation
CPI-CS09B8977D7	Dehydroepiandrosterone_bySTS_ESR1		ESR1	Signaling by Dehydroepiandrosterone	0	0	0.5753	24.436	AD	sig	MHC 1	Tau Microglia
CPI-CS09B8977D7	Dehydroepiandrosterone_bySTS_ESR1		ESR1	Signaling by Dehydroepiandrosterone	0.0011	0.0121	0.5356	8.467	AD	sig	MHC 2	Macrophage
CPI-CS09B8977D7	Dehydroepiandrosterone_bySTS_ESR1		ESR1	Signaling by Dehydroepiandrosterone	0	0	0.551	11.906	AD	sig	Macrophage	Macrophage
CPI-CS09B8977D7	Dehydroepiandrosterone_bySTS_ESR1		ESR1	Signaling by Dehydroepiandrosterone	0	0	0.673	40.564	AD	sig	Monocyte	DAM1
CPI-CS09B8977D7	Dehydroepiandrosterone_bySTS_ESR1		ESR1	Signaling by Dehydroepiandrosterone	0	0	0.5995	25.089	AD	sig	Monocyte	Homeostasis 1
CPI-CS09B8977D7	Dehydroepiandrosterone_bySTS_ESR1		ESR1	Signaling by Dehydroepiandrosterone	0	0	0.599	24.99	AD	sig	Monocyte	Homeostasis 2
CPI-CS09B8977D7	Dehydroepiandrosterone_bySTS_ESR1		ESR1	Signaling by Dehydroepiandrosterone	0	0	0.5797	20.94	AD	sig	Monocyte	Inflammation
CPI-CS09B8977D7	Dehydroepiandrosterone_bySTS_ESR1		ESR1	Signaling by Dehydroepiandrosterone	0	0	0.5202	8.415	AD	sig	Monocyte	T cell
CPI-CS09B8977D7	Dehydroepiandrosterone_bySTS_ESR1		ESR1	Signaling by Dehydroepiandrosterone	0	0	0.644	34.455	AD	sig	Monocyte	MHC 1
CPI-CS09B8977D7	Dehydroepiandrosterone_bySTS_ESR1		ESR1	Signaling by Dehydroepiandrosterone	0	0	0.6188	29.168	AD	sig	Monocyte	MHC 2
CPI-CS09B8977D7	Dehydroepiandrosterone_bySTS_ESR1		ESR1	Signaling by Dehydroepiandrosterone	0	0	0.7806	63.198	AD	sig	Monocyte	Macrophage
CPI-CS09B8977D7	Dehydroepiandrosterone_bySTS_ESR1		ESR1	Signaling by Dehydroepiandrosterone	0.0002	0.0024	0.509	6.068	AD	sig	Monocyte	Monocyte
CPI-CS09B8977D7	Dehydroepiandrosterone_bySTS_ESR1		ESR1	Signaling by Dehydroepiandrosterone	0	0	0.6526	36.281	AD	sig	Monocyte	Proliferation
CPI-CS09B8977D7	Dehydroepiandrosterone_bySTS_ESR1		ESR1	Signaling by Dehydroepiandrosterone	0	0	0.6157	28.511	AD	sig	Monocyte	Tau Microglia
CPI-CS09B8977D7	Dehydroepiandrosterone_bySTS_ESR1		ESR1	Signaling by Dehydroepiandrosterone	0	0	0.6867	42.533	AD	sig	Proliferation	DAM1
CPI-CS09B8977D7	Dehydroepiandrosterone_bySTS_ESR1		ESR1	Signaling by Dehydroepiandrosterone	0	0	0.6132	26.307	AD	sig	Proliferation	Homeostasis 1
CPI-CS09B8977D7	Dehydroepiandrosterone_bySTS_ESR1		ESR1	Signaling by Dehydroepiandrosterone	0	0	0.6127	26.203	AD	sig	Proliferation	Homeostasis 2
CPI-CS09B8977D7	Dehydroepiandrosterone_bySTS_ESR1		ESR1	Signaling by Dehydroepiandrosterone	0	0	0.5935	21.956	AD	sig	Proliferation	Inflammation
CPI-CS09B8977D7	Dehydroepiandrosterone_bySTS_ESR1		ESR1	Signaling by Dehydroepiandrosterone	0	0	0.5339	8.824	AD	sig	Proliferation	T cell
CPI-CS09B8977D7	Dehydroepiandrosterone_bySTS_ESR1		ESR1	Signaling by Dehydroepiandrosterone	0	0	0.6577	36.127	AD	sig	Proliferation	MHC 1
CPI-CS09B8977D7	Dehydroepiandrosterone_bySTS_ESR1		ESR1	Signaling by Dehydroepiandrosterone	0	0	0.6326	30.584	AD	sig	Proliferation	MHC 2
CPI-CS09B8977D7	Dehydroepiandrosterone_bySTS_ESR1		ESR1	Signaling by Dehydroepiandrosterone	0	0	0.7943	66.265	AD	sig	Proliferation	Macrophage
CPI-CS09B8977D7	Dehydroepiandrosterone_bySTS_ESR1		ESR1	Signaling by Dehydroepiandrosterone	0	0	0.5228	6.362	AD	sig	Proliferation	Monocyte
CPI-CS09B8977D7	Dehydroepiandrosterone_bySTS_ESR1		ESR1	Signaling by Dehydroepiandrosterone	0	0	0.6664	38.042	AD	sig	Proliferation	Proliferation
CPI-CS09B8977D7	Dehydroepiandrosterone_bySTS_ESR1		ESR1	Signaling by Dehydroepiandrosterone	0	0	0.6294	29.895	AD	sig	Proliferation	Tau Microglia
CPI-CS09B8977D7	Dehydroepiandrosterone_bySTS_ESR1		ESR1	Signaling by Dehydroepiandrosterone	0	0	0.5625	14.464	AD	sig	Tau Microglia	Macrophage
CPI-SS0F739D3DB	ANXA1_FPR1	ANXA1	FPR1	Signaling by Annexin	0	0	0.2257	40.711	AD	sig	T cell	Homeostasis 1
CPI-SS0F739D3DB	ANXA1_FPR1	ANXA1	FPR1	Signaling by Annexin	0	0	0.2083	33.766	AD	sig	T cell	Homeostasis 2
CPI-SS0F739D3DB	ANXA1_FPR1	ANXA1	FPR1	Signaling by Annexin	0	0	0.219	38.046	AD	sig	T cell	Inflammation
CPI-SS0F739D3DB	ANXA1_FPR1	ANXA1	FPR1	Signaling by Annexin	0	0	0.2548	52.272	AD	sig	T cell	MHC 1
CPI-SS0F739D3DB	ANXA1_FPR1	ANXA1	FPR1	Signaling by Annexin	0	0	0.249	49.993	AD	sig	T cell	MHC 2
CPI-SS0F739D3DB	ANXA1_FPR1	ANXA1	FPR1	Signaling by Annexin	0	0	0.2418	47.113	AD	sig	T cell	Monocyte
CPI-SS0F739D3DB	ANXA1_FPR1	ANXA1	FPR1	Signaling by Annexin	0	0	0.2071	33.306	AD	sig	T cell	Proliferation
CPI-SS0F739D3DB	ANXA1_FPR1	ANXA1	FPR1	Signaling by Annexin	0	0	0.2033	25.54	AD	sig	Monocyte	DAM1
CPI-SS0F739D3DB	ANXA1_FPR1	ANXA1	FPR1	Signaling by Annexin	0	0	0.253	49.713	AD	sig	Monocyte	Homeostasis 1
CPI-SS0F739D3DB	ANXA1_FPR1	ANXA1	FPR1	Signaling by Annexin	0	0	0.2356	41.232	AD	sig	Monocyte	Homeostasis 2
CPI-SS0F739D3DB	ANXA1_FPR1	ANXA1	FPR1	Signaling by Annexin	0	0	0.2463	46.458	AD	sig	Monocyte	Inflammation
CPI-SS0F739D3DB	ANXA1_FPR1	ANXA1	FPR1	Signaling by Annexin	0	0	0.2821	63.83	AD	sig	Monocyte	MHC 1
CPI-SS0F739D3DB	ANXA1_FPR1	ANXA1	FPR1	Signaling by Annexin	0	0	0.2763	61.047	AD	sig	Monocyte	MHC 2
CPI-SS0F739D3DB	ANXA1_FPR1	ANXA1	FPR1	Signaling by Annexin	0	0	0.2691	57.53	AD	sig	Monocyte	Monocyte
CPI-SS0F739D3DB	ANXA1_FPR1	ANXA1	FPR1	Signaling by Annexin	0	0	0.2344	40.67	AD	sig	Monocyte	Proliferation
CPI-SS06CCF5A54	ANXA1_FPR3	ANXA1	FPR3	Signaling by Annexin	0	0	0.2435	47.785	AD	sig	T cell	DAM1
CPI-SS06CCF5A54	ANXA1_FPR3	ANXA1	FPR3	Signaling by Annexin	0	0	0.2095	34.243	AD	sig	T cell	Inflammation
CPI-SS06CCF5A54	ANXA1_FPR3	ANXA1	FPR3	Signaling by Annexin	0	0	0.2629	55.499	AD	sig	T cell	MHC 1
CPI-SS06CCF5A54	ANXA1_FPR3	ANXA1	FPR3	Signaling by Annexin	0	0	0.2242	40.081	AD	sig	T cell	MHC 2
CPI-SS06CCF5A54	ANXA1_FPR3	ANXA1	FPR3	Signaling by Annexin	0	0	0.2333	43.707	AD	sig	T cell	Macrophage
CPI-SS06CCF5A54	ANXA1_FPR3	ANXA1	FPR3	Signaling by Annexin	0	0	0.2035	31.876	AD	sig	T cell	Proliferation
CPI-SS06CCF5A54	ANXA1_FPR3	ANXA1	FPR3	Signaling by Annexin	0	0	0.2708	58.35	AD	sig	Monocyte	DAM1
CPI-SS06CCF5A54	ANXA1_FPR3	ANXA1	FPR3	Signaling by Annexin	0	0	0.2033	25.532	AD	sig	Monocyte	Homeostasis 1
CPI-SS06CCF5A54	ANXA1_FPR3	ANXA1	FPR3	Signaling by Annexin	0	0	0.2188	33.068	AD	sig	Monocyte	Homeostasis 2
CPI-SS06CCF5A54	ANXA1_FPR3	ANXA1	FPR3	Signaling by Annexin	0	0	0.2368	41.814	AD	sig	Monocyte	Inflammation
CPI-SS06CCF5A54	ANXA1_FPR3	ANXA1	FPR3	Signaling by Annexin	0	0	0.2902	67.77	AD	sig	Monocyte	MHC 1
CPI-SS06CCF5A54	ANXA1_FPR3	ANXA1	FPR3	Signaling by Annexin	0	0	0.2515	48.943	AD	sig	Monocyte	MHC 2
CPI-SS06CCF5A54	ANXA1_FPR3	ANXA1	FPR3	Signaling by Annexin	0	0	0.2606	53.371	AD	sig	Monocyte	Macrophage
CPI-SS06CCF5A54	ANXA1_FPR3	ANXA1	FPR3	Signaling by Annexin	0	0	0.2153	31.381	AD	sig	Monocyte	Monocyte
CPI-SS06CCF5A54	ANXA1_FPR3	ANXA1	FPR3	Signaling by Annexin	0	0	0.2309	38.924	AD	sig	Monocyte	Proliferation
CPI-SS06CCF5A54	ANXA1_FPR3	ANXA1	FPR3	Signaling by Annexin	0	0	0.2006	24.227	AD	sig	Monocyte	Tau Microglia
CPI-CS007D418BE	2arachidonoylglycerol_byDAGLB_CNR1		CNR1	Signaling by Arachidonoylglycerol	0	0	0.2294	22.642	AD	sig	Homeostasis 1	DAM1
CPI-CS007D418BE	2arachidonoylglycerol_byDAGLB_CNR1		CNR1	Signaling by Arachidonoylglycerol	0	0	0.2423	60.487	AD	sig	Homeostasis 1	Homeostasis 1
CPI-CS007D418BE	2arachidonoylglycerol_byDAGLB_CNR1		CNR1	Signaling by Arachidonoylglycerol	0	0	0.2334	34.496	AD	sig	Homeostasis 1	MHC 1
CPI-CS007D418BE	2arachidonoylglycerol_byDAGLB_CNR1		CNR1	Signaling by Arachidonoylglycerol	0	0	0.2296	23.241	AD	sig	Homeostasis 1	Macrophage
CPI-CS007D418BE	2arachidonoylglycerol_byDAGLB_CNR1		CNR1	Signaling by Arachidonoylglycerol	0	0	0.2377	47.047	AD	sig	Homeostasis 1	Monocyte
CPI-CS007D418BE	2arachidonoylglycerol_byDAGLB_CNR1		CNR1	Signaling by Arachidonoylglycerol	0	0	0.2376	46.705	AD	sig	Homeostasis 1	Proliferation
CPI-CS007D418BE	2arachidonoylglycerol_byDAGLB_CNR1		CNR1	Signaling by Arachidonoylglycerol	0	0	0.2712	27.816	AD	sig	Homeostasis 2	DAM1
CPI-CS007D418BE	2arachidonoylglycerol_byDAGLB_CNR1		CNR1	Signaling by Arachidonoylglycerol	0	0	0.2841	74.307	AD	sig	Homeostasis 2	Homeostasis 1
CPI-CS007D418BE	2arachidonoylglycerol_byDAGLB_CNR1		CNR1	Signaling by Arachidonoylglycerol	0	0	0.2703	24.62	AD	sig	Homeostasis 2	Homeostasis 2
CPI-CS007D418BE	2arachidonoylglycerol_byDAGLB_CNR1		CNR1	Signaling by Arachidonoylglycerol	0	0	0.2753	42.378	AD	sig	Homeostasis 2	MHC 1
CPI-CS007D418BE	2arachidonoylglycerol_byDAGLB_CNR1		CNR1	Signaling by Arachidonoylglycerol	0	0	0.272	30.619	AD	sig	Homeostasis 2	MHC 2
CPI-CS007D418BE	2arachidonoylglycerol_byDAGLB_CNR1		CNR1	Signaling by Arachidonoylglycerol	0	0	0.2714	28.552	AD	sig	Homeostasis 2	Macrophage
CPI-CS007D418BE	2arachidonoylglycerol_byDAGLB_CNR1		CNR1	Signaling by Arachidonoylglycerol	0	0	0.2795	57.798	AD	sig	Homeostasis 2	Monocyte
CPI-CS007D418BE	2arachidonoylglycerol_byDAGLB_CNR1		CNR1	Signaling by Arachidonoylglycerol	0	0	0.2794	57.377	AD	sig	Homeostasis 2	Proliferation
CPI-CS007D418BE	2arachidonoylglycerol_byDAGLB_CNR1		CNR1	Signaling by Arachidonoylglycerol	0	0	0.2579	26.167	AD	sig	Inflammation	DAM1
CPI-CS007D418BE	2arachidonoylglycerol_byDAGLB_CNR1		CNR1	Signaling by Arachidonoylglycerol	0	0	0.2707	69.901	AD	sig	Inflammation	Homeostasis 1
CPI-CS007D418BE	2arachidonoylglycerol_byDAGLB_CNR1		CNR1	Signaling by Arachidonoylglycerol	0	0	0.257	23.16	AD	sig	Inflammation	Homeostasis 2
CPI-CS007D418BE	2arachidonoylglycerol_byDAGLB_CNR1		CNR1	Signaling by Arachidonoylglycerol	0	0	0.2619	39.865	AD	sig	Inflammation	MHC 1
CPI-CS007D418BE	2arachidonoylglycerol_byDAGLB_CNR1		CNR1	Signaling by Arachidonoylglycerol	0	0	0.2587	28.803	AD	sig	Inflammation	MHC 2
CPI-CS007D418BE	2arachidonoylglycerol_byDAGLB_CNR1		CNR1	Signaling by Arachidonoylglycerol	0	0	0.2581	26.859	AD	sig	Inflammation	Macrophage
CPI-CS007D418BE	2arachidonoylglycerol_byDAGLB_CNR1		CNR1	Signaling by Arachidonoylglycerol	0	0	0.2662	54.37	AD	sig	Inflammation	Monocyte
CPI-CS007D418BE	2arachidonoylglycerol_byDAGLB_CNR1		CNR1	Signaling by Arachidonoylglycerol	0	0	0.2661	53.975	AD	sig	Inflammation	Proliferation
CPI-CS007D418BE	2arachidonoylglycerol_byDAGLB_CNR1		CNR1	Signaling by Arachidonoylglycerol	0	0	0.2624	26.724	AD	sig	MHC 1	DAM1
CPI-CS007D418BE	2arachidonoylglycerol_byDAGLB_CNR1		CNR1	Signaling by Arachidonoylglycerol	0	0	0.2753	71.391	AD	sig	MHC 1	Homeostasis 1
CPI-CS007D418BE	2arachidonoylglycerol_byDAGLB_CNR1		CNR1	Signaling by Arachidonoylglycerol	0	0	0.2615	23.654	AD	sig	MHC 1	Homeostasis 2
CPI-CS007D418BE	2arachidonoylglycerol_byDAGLB_CNR1		CNR1	Signaling by Arachidonoylglycerol	0	0	0.2664	40.715	AD	sig	MHC 1	MHC 1
CPI-CS007D418BE	2arachidonoylglycerol_byDAGLB_CNR1		CNR1	Signaling by Arachidonoylglycerol	0	0	0.2632	29.417	AD	sig	MHC 1	MHC 2
CPI-CS007D418BE	2arachidonoylglycerol_byDAGLB_CNR1		CNR1	Signaling by Arachidonoylglycerol	0	0	0.2626	27.431	AD	sig	MHC 1	Macrophage
CPI-CS007D418BE	2arachidonoylglycerol_byDAGLB_CNR1		CNR1	Signaling by Arachidonoylglycerol	0	0	0.2707	55.529	AD	sig	MHC 1	Monocyte
CPI-CS007D418BE	2arachidonoylglycerol_byDAGLB_CNR1		CNR1	Signaling by Arachidonoylglycerol	0	0	0.2706	55.125	AD	sig	MHC 1	Proliferation
CPI-CS007D418BE	2arachidonoylglycerol_byDAGLB_CNR1		CNR1	Signaling by Arachidonoylglycerol	0.0012	0.0132	0.2517	63.609	AD	sig	Proliferation	Homeostasis 1
CPI-CS007D418BE	2arachidonoylglycerol_byDAGLB_CNR1		CNR1	Signaling by Arachidonoylglycerol	0	0	0.2387	23.795	AD	sig	Tau Microglia	DAM1
CPI-CS007D418BE	2arachidonoylglycerol_byDAGLB_CNR1		CNR1	Signaling by Arachidonoylglycerol	0	0	0.2516	63.565	AD	sig	Tau Microglia	Homeostasis 1
CPI-CS007D418BE	2arachidonoylglycerol_byDAGLB_CNR1		CNR1	Signaling by Arachidonoylglycerol	0	0	0.2378	21.061	AD	sig	Tau Microglia	Homeostasis 2
CPI-CS007D418BE	2arachidonoylglycerol_byDAGLB_CNR1		CNR1	Signaling by Arachidonoylglycerol	0	0	0.2427	36.252	AD	sig	Tau Microglia	MHC 1
CPI-CS007D418BE	2arachidonoylglycerol_byDAGLB_CNR1		CNR1	Signaling by Arachidonoylglycerol	0.0027	0.0284	0.2395	26.192	AD	sig	Tau Microglia	MHC 2
CPI-CS007D418BE	2arachidonoylglycerol_byDAGLB_CNR1		CNR1	Signaling by Arachidonoylglycerol	0	0	0.2389	24.424	AD	sig	Tau Microglia	Macrophage
CPI-CS007D418BE	2arachidonoylglycerol_byDAGLB_CNR1		CNR1	Signaling by Arachidonoylglycerol	0	0	0.247	49.442	AD	sig	Tau Microglia	Monocyte
CPI-CS007D418BE	2arachidonoylglycerol_byDAGLB_CNR1		CNR1	Signaling by Arachidonoylglycerol	0	0	0.2469	49.082	AD	sig	Tau Microglia	Proliferation
CPI-SS02A53F29E	LRPAP1_SORT1	LRPAP1	SORT1		0	0	0.4924	47.798	AD	sig	DAM1	Homeostasis 1
CPI-SS02A53F29E	LRPAP1_SORT1	LRPAP1	SORT1		0.0004	0.0046	0.5086	49.938	AD	sig	DAM1	Homeostasis 2
CPI-SS02A53F29E	LRPAP1_SORT1	LRPAP1	SORT1		0	0	0.5911	60.831	AD	sig	DAM1	MHC 1
CPI-SS02A53F29E	LRPAP1_SORT1	LRPAP1	SORT1		0	0	0.5223	51.754	AD	sig	DAM1	Proliferation
CPI-SS02A53F29E	LRPAP1_SORT1	LRPAP1	SORT1		0	0	0.4933	48.374	AD	sig	Homeostasis 1	Homeostasis 1
CPI-SS02A53F29E	LRPAP1_SORT1	LRPAP1	SORT1		0.0001	0.0012	0.5095	50.54	AD	sig	Homeostasis 1	Homeostasis 2
CPI-SS02A53F29E	LRPAP1_SORT1	LRPAP1	SORT1		0	0	0.592	61.564	AD	sig	Homeostasis 1	MHC 1
CPI-SS02A53F29E	LRPAP1_SORT1	LRPAP1	SORT1		0	0	0.5233	52.378	AD	sig	Homeostasis 1	Proliferation
CPI-SS02A53F29E	LRPAP1_SORT1	LRPAP1	SORT1		0	0	0.5792	51.571	AD	sig	Homeostasis 2	MHC 1
CPI-SS02A53F29E	LRPAP1_SORT1	LRPAP1	SORT1		0.0004	0.0046	0.5105	43.876	AD	sig	Homeostasis 2	Proliferation
CPI-SS02A53F29E	LRPAP1_SORT1	LRPAP1	SORT1		0	0	0.573	46.756	AD	sig	Inflammation	MHC 1
CPI-SS02A53F29E	LRPAP1_SORT1	LRPAP1	SORT1		0.0007	0.0079	0.5043	39.78	AD	sig	Inflammation	Proliferation
CPI-SS02A53F29E	LRPAP1_SORT1	LRPAP1	SORT1		0	0	0.4822	41.518	AD	sig	T cell	Homeostasis 1
CPI-SS02A53F29E	LRPAP1_SORT1	LRPAP1	SORT1		0	0	0.5808	52.839	AD	sig	T cell	MHC 1
CPI-SS02A53F29E	LRPAP1_SORT1	LRPAP1	SORT1		0	0	0.5121	44.955	AD	sig	T cell	Proliferation
CPI-SS02A53F29E	LRPAP1_SORT1	LRPAP1	SORT1		0	0	0.4865	44.165	AD	sig	MHC 1	Homeostasis 1
CPI-SS02A53F29E	LRPAP1_SORT1	LRPAP1	SORT1		0.0011	0.0121	0.5027	46.143	AD	sig	MHC 1	Homeostasis 2
CPI-SS02A53F29E	LRPAP1_SORT1	LRPAP1	SORT1		0	0	0.5851	56.208	AD	sig	MHC 1	MHC 1
CPI-SS02A53F29E	LRPAP1_SORT1	LRPAP1	SORT1		0	0	0.5164	47.821	AD	sig	MHC 1	Proliferation
CPI-SS02A53F29E	LRPAP1_SORT1	LRPAP1	SORT1		0.0002	0.0024	0.5175	63.209	AD	sig	MHC 2	Homeostasis 1
CPI-SS02A53F29E	LRPAP1_SORT1	LRPAP1	SORT1		0.0001	0.0012	0.5337	66.039	AD	sig	MHC 2	Homeostasis 2
CPI-SS02A53F29E	LRPAP1_SORT1	LRPAP1	SORT1		0	0	0.6162	80.444	AD	sig	MHC 2	MHC 1
CPI-SS02A53F29E	LRPAP1_SORT1	LRPAP1	SORT1		0	0	0.5474	68.441	AD	sig	MHC 2	Proliferation
CPI-SS02A53F29E	LRPAP1_SORT1	LRPAP1	SORT1		0.001	0.0111	0.4769	38.257	AD	sig	Macrophage	Homeostasis 1
CPI-SS02A53F29E	LRPAP1_SORT1	LRPAP1	SORT1		0	0	0.5755	48.689	AD	sig	Macrophage	MHC 1
CPI-SS02A53F29E	LRPAP1_SORT1	LRPAP1	SORT1		0.0002	0.0024	0.5068	41.424	AD	sig	Macrophage	Proliferation
CPI-SS02A53F29E	LRPAP1_SORT1	LRPAP1	SORT1		0	0	0.5241	67.291	AD	sig	Monocyte	Homeostasis 1
CPI-SS02A53F29E	LRPAP1_SORT1	LRPAP1	SORT1		0	0	0.5403	70.303	AD	sig	Monocyte	Homeostasis 2
CPI-SS02A53F29E	LRPAP1_SORT1	LRPAP1	SORT1		0	0	0.6228	85.639	AD	sig	Monocyte	MHC 1
CPI-SS02A53F29E	LRPAP1_SORT1	LRPAP1	SORT1		0	0	0.5541	72.86	AD	sig	Monocyte	Proliferation
CPI-SS02A53F29E	LRPAP1_SORT1	LRPAP1	SORT1		0	0	0.5152	61.814	AD	sig	Proliferation	Homeostasis 1
CPI-SS02A53F29E	LRPAP1_SORT1	LRPAP1	SORT1		0	0	0.5314	64.582	AD	sig	Proliferation	Homeostasis 2
CPI-SS02A53F29E	LRPAP1_SORT1	LRPAP1	SORT1		0	0	0.6139	78.669	AD	sig	Proliferation	MHC 1
CPI-SS02A53F29E	LRPAP1_SORT1	LRPAP1	SORT1		0	0	0.5452	66.931	AD	sig	Proliferation	Proliferation
CPI-SS02A53F29E	LRPAP1_SORT1	LRPAP1	SORT1		0	0	0.4878	44.959	AD	sig	Tau Microglia	Homeostasis 1
CPI-SS02A53F29E	LRPAP1_SORT1	LRPAP1	SORT1		0.001	0.0111	0.504	46.972	AD	sig	Tau Microglia	Homeostasis 2
CPI-SS02A53F29E	LRPAP1_SORT1	LRPAP1	SORT1		0	0	0.5864	57.218	AD	sig	Tau Microglia	MHC 1
CPI-SS02A53F29E	LRPAP1_SORT1	LRPAP1	SORT1		0	0	0.5177	48.68	AD	sig	Tau Microglia	Proliferation
CPI-SC085698C59	BMP5_BMPR1A_BMPR2	BMP5		Signaling by BMP	0	0	0.3132	39.091	AD	sig	Tau Microglia	Homeostasis 1
CPI-SC085698C59	BMP5_BMPR1A_BMPR2	BMP5		Signaling by BMP	0	0	0.3269	44.745	AD	sig	Tau Microglia	MHC 1
CPI-SC085698C59	BMP5_BMPR1A_BMPR2	BMP5		Signaling by BMP	0	0	0.4346	57.125	AD	sig	Tau Microglia	Proliferation
CPI-SC085698C59	BMP5_BMPR1A_BMPR2	BMP5		Signaling by BMP	0	0	0.3199	39.232	AD	sig	Tau Microglia	Tau Microglia
CPI-SC00D19A858	BMP6_BMPR1A_BMPR2	BMP6		Signaling by BMP	0	0	0.3138	4.114	AD	sig	T cell	Homeostasis 1
CPI-SC00D19A858	BMP6_BMPR1A_BMPR2	BMP6		Signaling by BMP	0	0	0.3275	4.709	AD	sig	T cell	MHC 1
CPI-SC00D19A858	BMP6_BMPR1A_BMPR2	BMP6		Signaling by BMP	0	0	0.4352	6.012	AD	sig	T cell	Proliferation
CPI-SC00D19A858	BMP6_BMPR1A_BMPR2	BMP6		Signaling by BMP	0	0	0.3205	4.129	AD	sig	T cell	Tau Microglia
CPI-SC0B1EBCCC6	BMP7_BMPR1A_BMPR2	BMP7		Signaling by BMP	0.0011	0.0121	0.3275	13.605	AD	sig	MHC 2	MHC 1
CPI-SC0B1EBCCC6	BMP7_BMPR1A_BMPR2	BMP7		Signaling by BMP	0	0	0.4352	17.369	AD	sig	MHC 2	Proliferation
CPI-SC0B1EBCCC6	BMP7_BMPR1A_BMPR2	BMP7		Signaling by BMP	0	0	0.3227	9.042	AD	sig	Monocyte	MHC 1
CPI-SC0B1EBCCC6	BMP7_BMPR1A_BMPR2	BMP7		Signaling by BMP	0	0	0.4303	11.543	AD	sig	Monocyte	Proliferation
CPI-SC0B1EBCCC6	BMP7_BMPR1A_BMPR2	BMP7		Signaling by BMP	0.0017	0.0184	0.3157	7.928	AD	sig	Monocyte	Tau Microglia
CPI-CS0569B9B91	BMPR1B_BMPR2_BMPR1A		BMPR1A	Signaling by BMP	0	0	0.3555	19.725	AD	sig	DAM1	MHC 1
CPI-CS0569B9B91	BMPR1B_BMPR2_BMPR1A		BMPR1A	Signaling by BMP	0	0	0.4755	29.613	AD	sig	DAM1	Proliferation
CPI-CS0569B9B91	BMPR1B_BMPR2_BMPR1A		BMPR1A	Signaling by BMP	0.0001	0.0012	0.3485	19.149	AD	sig	DAM1	Tau Microglia
CPI-CS0569B9B91	BMPR1B_BMPR2_BMPR1A		BMPR1A	Signaling by BMP	0	0	0.4622	23.868	AD	sig	Homeostasis 1	Proliferation
CPI-CS0569B9B91	BMPR1B_BMPR2_BMPR1A		BMPR1A	Signaling by BMP	0	0	0.4437	14.956	AD	sig	Homeostasis 2	Proliferation
CPI-CS0569B9B91	BMPR1B_BMPR2_BMPR1A		BMPR1A	Signaling by BMP	0	0	0.3994	24.845	AD	sig	Inflammation	DAM1
CPI-CS0569B9B91	BMPR1B_BMPR2_BMPR1A		BMPR1A	Signaling by BMP	0	0	0.4109	26.181	AD	sig	Inflammation	Homeostasis 1
CPI-CS0569B9B91	BMPR1B_BMPR2_BMPR1A		BMPR1A	Signaling by BMP	0	0	0.431	28.518	AD	sig	Inflammation	Homeostasis 2
CPI-CS0569B9B91	BMPR1B_BMPR2_BMPR1A		BMPR1A	Signaling by BMP	0	0	0.3765	22.195	AD	sig	Inflammation	Inflammation
CPI-CS0569B9B91	BMPR1B_BMPR2_BMPR1A		BMPR1A	Signaling by BMP	0	0	0.4246	27.773	AD	sig	Inflammation	MHC 1
CPI-CS0569B9B91	BMPR1B_BMPR2_BMPR1A		BMPR1A	Signaling by BMP	0	0	0.5446	41.696	AD	sig	Inflammation	Proliferation
CPI-CS0569B9B91	BMPR1B_BMPR2_BMPR1A		BMPR1A	Signaling by BMP	0	0	0.4176	26.962	AD	sig	Inflammation	Tau Microglia
CPI-CS0569B9B91	BMPR1B_BMPR2_BMPR1A		BMPR1A	Signaling by BMP	0	0	0.3576	16.805	AD	sig	T cell	DAM1
CPI-CS0569B9B91	BMPR1B_BMPR2_BMPR1A		BMPR1A	Signaling by BMP	0	0	0.3691	17.708	AD	sig	T cell	Homeostasis 1
CPI-CS0569B9B91	BMPR1B_BMPR2_BMPR1A		BMPR1A	Signaling by BMP	0	0	0.3893	19.289	AD	sig	T cell	Homeostasis 2
CPI-CS0569B9B91	BMPR1B_BMPR2_BMPR1A		BMPR1A	Signaling by BMP	0	0	0.3828	18.785	AD	sig	T cell	MHC 1
CPI-CS0569B9B91	BMPR1B_BMPR2_BMPR1A		BMPR1A	Signaling by BMP	0	0	0.5028	28.202	AD	sig	T cell	Proliferation
CPI-CS0569B9B91	BMPR1B_BMPR2_BMPR1A		BMPR1A	Signaling by BMP	0	0	0.3758	18.236	AD	sig	T cell	Tau Microglia
CPI-CS0569B9B91	BMPR1B_BMPR2_BMPR1A		BMPR1A	Signaling by BMP	0	0	0.4562	22.479	AD	sig	MHC 1	Proliferation
CPI-CS0569B9B91	BMPR1B_BMPR2_BMPR1A		BMPR1A	Signaling by BMP	0	0	0.4585	21.857	AD	sig	MHC 2	Proliferation
CPI-CS0569B9B91	BMPR1B_BMPR2_BMPR1A		BMPR1A	Signaling by BMP	0	0	0.3554	19.091	AD	sig	Macrophage	Homeostasis 1
CPI-CS0569B9B91	BMPR1B_BMPR2_BMPR1A		BMPR1A	Signaling by BMP	0.001	0.0111	0.3755	20.795	AD	sig	Macrophage	Homeostasis 2
CPI-CS0569B9B91	BMPR1B_BMPR2_BMPR1A		BMPR1A	Signaling by BMP	0	0	0.3691	20.253	AD	sig	Macrophage	MHC 1
CPI-CS0569B9B91	BMPR1B_BMPR2_BMPR1A		BMPR1A	Signaling by BMP	0	0	0.4891	30.406	AD	sig	Macrophage	Proliferation
CPI-CS0569B9B91	BMPR1B_BMPR2_BMPR1A		BMPR1A	Signaling by BMP	0	0	0.3621	19.661	AD	sig	Macrophage	Tau Microglia
CPI-CS0569B9B91	BMPR1B_BMPR2_BMPR1A		BMPR1A	Signaling by BMP	0.0012	0.0132	0.3568	18.99	AD	sig	Monocyte	Homeostasis 1
CPI-CS0569B9B91	BMPR1B_BMPR2_BMPR1A		BMPR1A	Signaling by BMP	0.0018	0.0194	0.3769	20.685	AD	sig	Monocyte	Homeostasis 2
CPI-CS0569B9B91	BMPR1B_BMPR2_BMPR1A		BMPR1A	Signaling by BMP	0	0	0.3705	20.145	AD	sig	Monocyte	MHC 1
CPI-CS0569B9B91	BMPR1B_BMPR2_BMPR1A		BMPR1A	Signaling by BMP	0	0	0.4905	30.244	AD	sig	Monocyte	Proliferation
CPI-CS0569B9B91	BMPR1B_BMPR2_BMPR1A		BMPR1A	Signaling by BMP	0	0	0.3635	19.556	AD	sig	Monocyte	Tau Microglia
CPI-CS0569B9B91	BMPR1B_BMPR2_BMPR1A		BMPR1A	Signaling by BMP	0	0	0.462	24.808	AD	sig	Proliferation	Proliferation
CPI-CS0569B9B91	BMPR1B_BMPR2_BMPR1A		BMPR1A	Signaling by BMP	0	0	0.3534	20.233	AD	sig	Tau Microglia	Homeostasis 1
CPI-CS0569B9B91	BMPR1B_BMPR2_BMPR1A		BMPR1A	Signaling by BMP	0.0016	0.0174	0.3735	22.039	AD	sig	Tau Microglia	Homeostasis 2
CPI-CS0569B9B91	BMPR1B_BMPR2_BMPR1A		BMPR1A	Signaling by BMP	0	0	0.3671	21.464	AD	sig	Tau Microglia	MHC 1
CPI-CS0569B9B91	BMPR1B_BMPR2_BMPR1A		BMPR1A	Signaling by BMP	0	0	0.4871	32.224	AD	sig	Tau Microglia	Proliferation
CPI-CS0569B9B91	BMPR1B_BMPR2_BMPR1A		BMPR1A	Signaling by BMP	0	0	0.3601	20.837	AD	sig	Tau Microglia	Tau Microglia
CPI-SS084EA55C0	CLSTN1_NRXN1	CLSTN1	NRXN1	Signaling by Calsyntenin	0	0	0.5517	5.258	AD	sig	DAM1	Homeostasis 1
CPI-SS084EA55C0	CLSTN1_NRXN1	CLSTN1	NRXN1	Signaling by Calsyntenin	0	0	0.6188	13.515	AD	sig	Homeostasis 1	Homeostasis 1
CPI-SS084EA55C0	CLSTN1_NRXN1	CLSTN1	NRXN1	Signaling by Calsyntenin	0	0	0.5516	8.876	AD	sig	Homeostasis 1	T cell
CPI-SS084EA55C0	CLSTN1_NRXN1	CLSTN1	NRXN1	Signaling by Calsyntenin	0	0	0.5671	9.949	AD	sig	Homeostasis 1	Macrophage
CPI-SS084EA55C0	CLSTN1_NRXN1	CLSTN1	NRXN1	Signaling by Calsyntenin	0	0	0.5847	9.322	AD	sig	Homeostasis 2	Homeostasis 1
CPI-SS084EA55C0	CLSTN1_NRXN1	CLSTN1	NRXN1	Signaling by Calsyntenin	0	0	0.5561	5.796	AD	sig	T cell	Homeostasis 1
CPI-SS084EA55C0	CLSTN1_NRXN1	CLSTN1	NRXN1	Signaling by Calsyntenin	0	0	0.5839	9.224	AD	sig	MHC 1	Homeostasis 1
CPI-SS084EA55C0	CLSTN1_NRXN1	CLSTN1	NRXN1	Signaling by Calsyntenin	0	0	0.6212	13.809	AD	sig	Proliferation	Homeostasis 1
CPI-SS084EA55C0	CLSTN1_NRXN1	CLSTN1	NRXN1	Signaling by Calsyntenin	0	0	0.5695	10.165	AD	sig	Proliferation	Macrophage
CPI-SS084EA55C0	CLSTN1_NRXN1	CLSTN1	NRXN1	Signaling by Calsyntenin	0	0	0.5638	6.75	AD	sig	Tau Microglia	Homeostasis 1
CPI-SS09A6C048C	CLSTN2_NRXN1	CLSTN2	NRXN1	Signaling by Calsyntenin	0	0	0.4226	7.663	AD	sig	DAM1	Homeostasis 1
CPI-SS09A6C048C	CLSTN2_NRXN1	CLSTN2	NRXN1	Signaling by Calsyntenin	0	0	0.4599	18.3	AD	sig	Homeostasis 1	Homeostasis 1
CPI-SS09A6C048C	CLSTN2_NRXN1	CLSTN2	NRXN1	Signaling by Calsyntenin	0	0	0.4082	13.471	AD	sig	Homeostasis 1	Macrophage
CPI-SS09A6C048C	CLSTN2_NRXN1	CLSTN2	NRXN1	Signaling by Calsyntenin	0	0	0.4289	9.462	AD	sig	Homeostasis 2	Homeostasis 1
CPI-SS09A6C048C	CLSTN2_NRXN1	CLSTN2	NRXN1	Signaling by Calsyntenin	0	0	0.407	3.214	AD	sig	Inflammation	Homeostasis 1
CPI-SS09A6C048C	CLSTN2_NRXN1	CLSTN2	NRXN1	Signaling by Calsyntenin	0	0	0.4205	7.073	AD	sig	T cell	Homeostasis 1
CPI-SS09A6C048C	CLSTN2_NRXN1	CLSTN2	NRXN1	Signaling by Calsyntenin	0	0	0.4365	11.621	AD	sig	MHC 1	Homeostasis 1
CPI-SS09A6C048C	CLSTN2_NRXN1	CLSTN2	NRXN1	Signaling by Calsyntenin	0	0	0.4367	11.696	AD	sig	MHC 2	Homeostasis 1
CPI-SS09A6C048C	CLSTN2_NRXN1	CLSTN2	NRXN1	Signaling by Calsyntenin	0	0	0.4292	9.559	AD	sig	Macrophage	Homeostasis 1
CPI-SS09A6C048C	CLSTN2_NRXN1	CLSTN2	NRXN1	Signaling by Calsyntenin	0	0	0.4392	12.391	AD	sig	Monocyte	Homeostasis 1
CPI-SS09A6C048C	CLSTN2_NRXN1	CLSTN2	NRXN1	Signaling by Calsyntenin	0	0	0.4501	15.51	AD	sig	Proliferation	Homeostasis 1
CPI-SS09A6C048C	CLSTN2_NRXN1	CLSTN2	NRXN1	Signaling by Calsyntenin	0	0	0.4126	4.83	AD	sig	Tau Microglia	Homeostasis 1
CPI-SS0B880A155	CLSTN3_NRXN1	CLSTN3	NRXN1	Signaling by Calsyntenin	0	0	0.4223	8.026	AD	sig	DAM1	Homeostasis 1
CPI-SS0B880A155	CLSTN3_NRXN1	CLSTN3	NRXN1	Signaling by Calsyntenin	0	0	0.4679	21.789	AD	sig	Homeostasis 1	Homeostasis 1
CPI-SS0B880A155	CLSTN3_NRXN1	CLSTN3	NRXN1	Signaling by Calsyntenin	0	0	0.4162	16.039	AD	sig	Homeostasis 1	Macrophage
CPI-SS0B880A155	CLSTN3_NRXN1	CLSTN3	NRXN1	Signaling by Calsyntenin	0	0	0.4185	6.876	AD	sig	Homeostasis 2	Homeostasis 1
CPI-SS0B880A155	CLSTN3_NRXN1	CLSTN3	NRXN1	Signaling by Calsyntenin	0	0	0.4228	8.193	AD	sig	Inflammation	Homeostasis 1
CPI-SS0B880A155	CLSTN3_NRXN1	CLSTN3	NRXN1	Signaling by Calsyntenin	0	0	0.4938	29.584	AD	sig	T cell	Homeostasis 1
CPI-SS0B880A155	CLSTN3_NRXN1	CLSTN3	NRXN1	Signaling by Calsyntenin	0	0	0.4265	19.428	AD	sig	T cell	T cell
CPI-SS0B880A155	CLSTN3_NRXN1	CLSTN3	NRXN1	Signaling by Calsyntenin	0	0	0.442	21.776	AD	sig	T cell	Macrophage
CPI-SS0B880A155	CLSTN3_NRXN1	CLSTN3	NRXN1	Signaling by Calsyntenin	0.0002	0.0024	0.433	20.407	AD	sig	T cell	Monocyte
CPI-SS0B880A155	CLSTN3_NRXN1	CLSTN3	NRXN1	Signaling by Calsyntenin	0	0	0.4348	20.681	AD	sig	T cell	Proliferation
CPI-SS0B880A155	CLSTN3_NRXN1	CLSTN3	NRXN1	Signaling by Calsyntenin	0	0	0.4047	16.142	AD	sig	T cell	Tau Microglia
CPI-SS0B880A155	CLSTN3_NRXN1	CLSTN3	NRXN1	Signaling by Calsyntenin	0	0	0.4398	13.307	AD	sig	MHC 1	Homeostasis 1
CPI-SS0B880A155	CLSTN3_NRXN1	CLSTN3	NRXN1	Signaling by Calsyntenin	0	0	0.4362	12.222	AD	sig	MHC 2	Homeostasis 1
CPI-SS0B880A155	CLSTN3_NRXN1	CLSTN3	NRXN1	Signaling by Calsyntenin	0	0	0.422	7.931	AD	sig	Macrophage	Homeostasis 1
CPI-SS0B880A155	CLSTN3_NRXN1	CLSTN3	NRXN1	Signaling by Calsyntenin	0	0	0.4614	19.839	AD	sig	Monocyte	Homeostasis 1
CPI-SS0B880A155	CLSTN3_NRXN1	CLSTN3	NRXN1	Signaling by Calsyntenin	0.0015	0.0163	0.4097	14.603	AD	sig	Monocyte	Macrophage
CPI-SS0B880A155	CLSTN3_NRXN1	CLSTN3	NRXN1	Signaling by Calsyntenin	0	0	0.4516	16.882	AD	sig	Proliferation	Homeostasis 1
CPI-SS0B880A155	CLSTN3_NRXN1	CLSTN3	NRXN1	Signaling by Calsyntenin	0	0	0.4137	5.451	AD	sig	Tau Microglia	Homeostasis 1
CPI-SS0E5F8A5F7	LRRTM2_NRXN1	LRRTM2	NRXN1	Signaling by Leucine-Rich Repeat Transmembrane Neuronal Protein	0	0	0.4117	29.584	AD	sig	Homeostasis 1	Homeostasis 1
CPI-SS0E5F8A5F7	LRRTM2_NRXN1	LRRTM2	NRXN1	Signaling by Leucine-Rich Repeat Transmembrane Neuronal Protein	0	0	0.4059	18.986	AD	sig	MHC 1	Homeostasis 1
CPI-SS0E5F8A5F7	LRRTM2_NRXN1	LRRTM2	NRXN1	Signaling by Leucine-Rich Repeat Transmembrane Neuronal Protein	0	0	0.4035	14.412	AD	sig	Macrophage	Homeostasis 1
CPI-SS0E5F8A5F7	LRRTM2_NRXN1	LRRTM2	NRXN1	Signaling by Leucine-Rich Repeat Transmembrane Neuronal Protein	0	0	0.4035	14.419	AD	sig	Monocyte	Homeostasis 1
CPI-SS0E5F8A5F7	LRRTM2_NRXN1	LRRTM2	NRXN1	Signaling by Leucine-Rich Repeat Transmembrane Neuronal Protein	0	0	0.4095	25.611	AD	sig	Proliferation	Homeostasis 1
CPI-SS0626DF0EB	LRRTM3_NRXN1	LRRTM3	NRXN1	Signaling by Leucine-Rich Repeat Transmembrane Neuronal Protein	0	0	0.4336	9.328	AD	sig	DAM1	Homeostasis 1
CPI-SS0626DF0EB	LRRTM3_NRXN1	LRRTM3	NRXN1	Signaling by Leucine-Rich Repeat Transmembrane Neuronal Protein	0	0	0.4739	19.236	AD	sig	Homeostasis 1	Homeostasis 1
CPI-SS0626DF0EB	LRRTM3_NRXN1	LRRTM3	NRXN1	Signaling by Leucine-Rich Repeat Transmembrane Neuronal Protein	0	0	0.4222	14.16	AD	sig	Homeostasis 1	Macrophage
CPI-SS0626DF0EB	LRRTM3_NRXN1	LRRTM3	NRXN1	Signaling by Leucine-Rich Repeat Transmembrane Neuronal Protein	0	0	0.4408	11.103	AD	sig	Homeostasis 2	Homeostasis 1
CPI-SS0626DF0EB	LRRTM3_NRXN1	LRRTM3	NRXN1	Signaling by Leucine-Rich Repeat Transmembrane Neuronal Protein	0	0	0.4152	4.799	AD	sig	Inflammation	Homeostasis 1
CPI-SS0626DF0EB	LRRTM3_NRXN1	LRRTM3	NRXN1	Signaling by Leucine-Rich Repeat Transmembrane Neuronal Protein	0	0	0.4224	6.568	AD	sig	T cell	Homeostasis 1
CPI-SS0626DF0EB	LRRTM3_NRXN1	LRRTM3	NRXN1	Signaling by Leucine-Rich Repeat Transmembrane Neuronal Protein	0	0	0.4427	11.557	AD	sig	MHC 1	Homeostasis 1
CPI-SS0626DF0EB	LRRTM3_NRXN1	LRRTM3	NRXN1	Signaling by Leucine-Rich Repeat Transmembrane Neuronal Protein	0.0006	0.0068	0.4378	10.372	AD	sig	MHC 2	Homeostasis 1
CPI-SS0626DF0EB	LRRTM3_NRXN1	LRRTM3	NRXN1	Signaling by Leucine-Rich Repeat Transmembrane Neuronal Protein	0	0	0.4339	9.395	AD	sig	Macrophage	Homeostasis 1
CPI-SS0626DF0EB	LRRTM3_NRXN1	LRRTM3	NRXN1	Signaling by Leucine-Rich Repeat Transmembrane Neuronal Protein	0	0	0.4467	12.542	AD	sig	Monocyte	Homeostasis 1
CPI-SS0626DF0EB	LRRTM3_NRXN1	LRRTM3	NRXN1	Signaling by Leucine-Rich Repeat Transmembrane Neuronal Protein	0	0	0.4606	15.968	AD	sig	Proliferation	Homeostasis 1
CPI-SS0626DF0EB	LRRTM3_NRXN1	LRRTM3	NRXN1	Signaling by Leucine-Rich Repeat Transmembrane Neuronal Protein	0	0	0.424	6.964	AD	sig	Tau Microglia	Homeostasis 1
CPI-SS03466C597	LRRTM4_NRXN1	LRRTM4	NRXN1	Signaling by Leucine-Rich Repeat Transmembrane Neuronal Protein	0	0	0.5827	8.864	AD	sig	Homeostasis 1	DAM1
CPI-SS03466C597	LRRTM4_NRXN1	LRRTM4	NRXN1	Signaling by Leucine-Rich Repeat Transmembrane Neuronal Protein	0	0	0.6838	18.309	AD	sig	Homeostasis 1	Homeostasis 1
CPI-SS03466C597	LRRTM4_NRXN1	LRRTM4	NRXN1	Signaling by Leucine-Rich Repeat Transmembrane Neuronal Protein	0	0	0.6166	12.024	AD	sig	Homeostasis 1	T cell
CPI-SS03466C597	LRRTM4_NRXN1	LRRTM4	NRXN1	Signaling by Leucine-Rich Repeat Transmembrane Neuronal Protein	0.003	0.0313	0.5498	5.782	AD	sig	Homeostasis 1	MHC 1
CPI-SS03466C597	LRRTM4_NRXN1	LRRTM4	NRXN1	Signaling by Leucine-Rich Repeat Transmembrane Neuronal Protein	0	0	0.6321	13.477	AD	sig	Homeostasis 1	Macrophage
CPI-SS03466C597	LRRTM4_NRXN1	LRRTM4	NRXN1	Signaling by Leucine-Rich Repeat Transmembrane Neuronal Protein	0	0	0.6231	12.63	AD	sig	Homeostasis 1	Monocyte
CPI-SS03466C597	LRRTM4_NRXN1	LRRTM4	NRXN1	Signaling by Leucine-Rich Repeat Transmembrane Neuronal Protein	0	0	0.6249	12.799	AD	sig	Homeostasis 1	Proliferation
CPI-SS03466C597	LRRTM4_NRXN1	LRRTM4	NRXN1	Signaling by Leucine-Rich Repeat Transmembrane Neuronal Protein	0	0	0.5948	9.99	AD	sig	Homeostasis 1	Tau Microglia
CPI-SS03466C597	LRRTM4_NRXN1	LRRTM4	NRXN1	Signaling by Leucine-Rich Repeat Transmembrane Neuronal Protein	0	0	0.5786	10.651	AD	sig	MHC 1	Homeostasis 1
CPI-SS03466C597	LRRTM4_NRXN1	LRRTM4	NRXN1	Signaling by Leucine-Rich Repeat Transmembrane Neuronal Protein	0.0001	0.0012	0.5548	8.915	AD	sig	Macrophage	Homeostasis 1
CPI-SS03466C597	LRRTM4_NRXN1	LRRTM4	NRXN1	Signaling by Leucine-Rich Repeat Transmembrane Neuronal Protein	0	0	0.5914	11.58	AD	sig	Monocyte	Homeostasis 1
CPI-SS03466C597	LRRTM4_NRXN1	LRRTM4	NRXN1	Signaling by Leucine-Rich Repeat Transmembrane Neuronal Protein	0	0	0.6184	13.543	AD	sig	Proliferation	Homeostasis 1
CPI-SS03466C597	LRRTM4_NRXN1	LRRTM4	NRXN1	Signaling by Leucine-Rich Repeat Transmembrane Neuronal Protein	0.0038	0.0391	0.5667	9.969	AD	sig	Proliferation	Macrophage
CPI-SS0D2DF7881	NLGN1_NRXN1	NLGN1	NRXN1	Signaling by Neuroligin	0.0035	0.0362	0.4806	5.634	AD	sig	DAM1	Homeostasis 1
CPI-SS0D2DF7881	NLGN1_NRXN1	NLGN1	NRXN1	Signaling by Neuroligin	0	0	0.5787	16.454	AD	sig	Homeostasis 1	Homeostasis 1
CPI-SS0D2DF7881	NLGN1_NRXN1	NLGN1	NRXN1	Signaling by Neuroligin	0	0	0.5114	10.805	AD	sig	Homeostasis 1	T cell
CPI-SS0D2DF7881	NLGN1_NRXN1	NLGN1	NRXN1	Signaling by Neuroligin	0	0	0.527	12.111	AD	sig	Homeostasis 1	Macrophage
CPI-SS0D2DF7881	NLGN1_NRXN1	NLGN1	NRXN1	Signaling by Neuroligin	0.0002	0.0024	0.5179	11.35	AD	sig	Homeostasis 1	Monocyte
CPI-SS0D2DF7881	NLGN1_NRXN1	NLGN1	NRXN1	Signaling by Neuroligin	0	0	0.5197	11.502	AD	sig	Homeostasis 1	Proliferation
CPI-SS0D2DF7881	NLGN1_NRXN1	NLGN1	NRXN1	Signaling by Neuroligin	0	0	0.4897	8.978	AD	sig	Homeostasis 1	Tau Microglia
CPI-SS0D2DF7881	NLGN1_NRXN1	NLGN1	NRXN1	Signaling by Neuroligin	0	0	0.5105	8.925	AD	sig	MHC 1	Homeostasis 1
CPI-SS0D2DF7881	NLGN1_NRXN1	NLGN1	NRXN1	Signaling by Neuroligin	0	0	0.5042	8.239	AD	sig	Macrophage	Homeostasis 1
CPI-SS0D2DF7881	NLGN1_NRXN1	NLGN1	NRXN1	Signaling by Neuroligin	0	0	0.5326	11.363	AD	sig	Monocyte	Homeostasis 1
CPI-SS0D2DF7881	NLGN1_NRXN1	NLGN1	NRXN1	Signaling by Neuroligin	0	0	0.5507	13.367	AD	sig	Proliferation	Homeostasis 1
CPI-SS0D2DF7881	NLGN1_NRXN1	NLGN1	NRXN1	Signaling by Neuroligin	0.0019	0.0204	0.499	9.84	AD	sig	Proliferation	Macrophage
CPI-SS0B360C289	NLGN2_NRXN1	NLGN2	NRXN1	Signaling by Neuroligin	0	0	0.4062	8.307	AD	sig	DAM1	Homeostasis 1
CPI-SS0B360C289	NLGN2_NRXN1	NLGN2	NRXN1	Signaling by Neuroligin	0	0	0.417	16.866	AD	sig	Homeostasis 1	Homeostasis 1
CPI-SS0B360C289	NLGN2_NRXN1	NLGN2	NRXN1	Signaling by Neuroligin	0	0	0.4071	9.001	AD	sig	Inflammation	Homeostasis 1
CPI-SS0B360C289	NLGN2_NRXN1	NLGN2	NRXN1	Signaling by Neuroligin	0	0	0.4052	7.512	AD	sig	T cell	Homeostasis 1
CPI-SS0B360C289	NLGN2_NRXN1	NLGN2	NRXN1	Signaling by Neuroligin	0	0	0.4119	12.822	AD	sig	MHC 1	Homeostasis 1
CPI-SS0B360C289	NLGN2_NRXN1	NLGN2	NRXN1	Signaling by Neuroligin	0	0	0.4047	7.138	AD	sig	MHC 2	Homeostasis 1
CPI-SS0B360C289	NLGN2_NRXN1	NLGN2	NRXN1	Signaling by Neuroligin	0	0	0.4077	9.503	AD	sig	Macrophage	Homeostasis 1
CPI-SS0B360C289	NLGN2_NRXN1	NLGN2	NRXN1	Signaling by Neuroligin	0	0	0.4051	7.448	AD	sig	Monocyte	Homeostasis 1
CPI-SS0B360C289	NLGN2_NRXN1	NLGN2	NRXN1	Signaling by Neuroligin	0	0	0.417	16.832	AD	sig	Proliferation	Homeostasis 1
CPI-SS0B360C289	NLGN2_NRXN1	NLGN2	NRXN1	Signaling by Neuroligin	0	0	0.4044	6.925	AD	sig	Tau Microglia	Homeostasis 1
CPI-SS0613D0B62	NLGN3_NRXN1	NLGN3	NRXN1	Signaling by Neuroligin	0	0	0.409	10.836	AD	sig	DAM1	Homeostasis 1
CPI-SS0613D0B62	NLGN3_NRXN1	NLGN3	NRXN1	Signaling by Neuroligin	0	0	0.4174	17.63	AD	sig	Homeostasis 1	Homeostasis 1
CPI-SS0613D0B62	NLGN3_NRXN1	NLGN3	NRXN1	Signaling by Neuroligin	0	0	0.419	18.94	AD	sig	Homeostasis 2	Homeostasis 1
CPI-SS0613D0B62	NLGN3_NRXN1	NLGN3	NRXN1	Signaling by Neuroligin	0	0	0.4049	7.52	AD	sig	Inflammation	Homeostasis 1
CPI-SS0613D0B62	NLGN3_NRXN1	NLGN3	NRXN1	Signaling by Neuroligin	0	0	0.4062	8.555	AD	sig	T cell	Homeostasis 1
CPI-SS0613D0B62	NLGN3_NRXN1	NLGN3	NRXN1	Signaling by Neuroligin	0	0	0.4101	11.73	AD	sig	MHC 1	Homeostasis 1
CPI-SS0613D0B62	NLGN3_NRXN1	NLGN3	NRXN1	Signaling by Neuroligin	0	0	0.4092	10.969	AD	sig	MHC 2	Homeostasis 1
CPI-SS0613D0B62	NLGN3_NRXN1	NLGN3	NRXN1	Signaling by Neuroligin	0	0	0.4059	8.289	AD	sig	Macrophage	Homeostasis 1
CPI-SS0613D0B62	NLGN3_NRXN1	NLGN3	NRXN1	Signaling by Neuroligin	0	0	0.4105	12.089	AD	sig	Monocyte	Homeostasis 1
CPI-SS0613D0B62	NLGN3_NRXN1	NLGN3	NRXN1	Signaling by Neuroligin	0	0	0.4104	11.968	AD	sig	Proliferation	Homeostasis 1
CPI-SS0613D0B62	NLGN3_NRXN1	NLGN3	NRXN1	Signaling by Neuroligin	0	0	0.4067	8.997	AD	sig	Tau Microglia	Homeostasis 1
CPI-SS0FA378947	NLGN4X_NRXN1	NLGN4X	NRXN1	Signaling by Neuroligin	0	0	0.4166	5.678	AD	sig	DAM1	Homeostasis 1
CPI-SS0FA378947	NLGN4X_NRXN1	NLGN4X	NRXN1	Signaling by Neuroligin	0	0	0.4336	10.284	AD	sig	Homeostasis 1	Homeostasis 1
CPI-SS0FA378947	NLGN4X_NRXN1	NLGN4X	NRXN1	Signaling by Neuroligin	0	0	0.413	4.713	AD	sig	Homeostasis 2	Homeostasis 1
CPI-SS0FA378947	NLGN4X_NRXN1	NLGN4X	NRXN1	Signaling by Neuroligin	0	0	0.4137	4.881	AD	sig	Inflammation	Homeostasis 1
CPI-SS0FA378947	NLGN4X_NRXN1	NLGN4X	NRXN1	Signaling by Neuroligin	0	0	0.419	6.321	AD	sig	T cell	Homeostasis 1
CPI-SS0FA378947	NLGN4X_NRXN1	NLGN4X	NRXN1	Signaling by Neuroligin	0	0	0.4192	6.373	AD	sig	MHC 1	Homeostasis 1
CPI-SS0FA378947	NLGN4X_NRXN1	NLGN4X	NRXN1	Signaling by Neuroligin	0	0	0.4104	4.008	AD	sig	MHC 2	Homeostasis 1
CPI-SS0FA378947	NLGN4X_NRXN1	NLGN4X	NRXN1	Signaling by Neuroligin	0	0	0.4197	6.508	AD	sig	Macrophage	Homeostasis 1
CPI-SS0FA378947	NLGN4X_NRXN1	NLGN4X	NRXN1	Signaling by Neuroligin	0	0	0.4223	7.229	AD	sig	Monocyte	Homeostasis 1
CPI-SS0FA378947	NLGN4X_NRXN1	NLGN4X	NRXN1	Signaling by Neuroligin	0	0	0.4212	6.931	AD	sig	Proliferation	Homeostasis 1
CPI-SS0FA378947	NLGN4X_NRXN1	NLGN4X	NRXN1	Signaling by Neuroligin	0	0	0.4124	4.549	AD	sig	Tau Microglia	Homeostasis 1
CPI-SS0CCB5F46B	NLGN4Y_NRXN1	NLGN4Y	NRXN1	Signaling by Neuroligin	0	0	0.4551	5.158	AD	sig	DAM1	Homeostasis 1
CPI-SS0CCB5F46B	NLGN4Y_NRXN1	NLGN4Y	NRXN1	Signaling by Neuroligin	0	0	0.4927	8.419	AD	sig	Homeostasis 1	Homeostasis 1
CPI-SS0CCB5F46B	NLGN4Y_NRXN1	NLGN4Y	NRXN1	Signaling by Neuroligin	0	0	0.4771	7.662	AD	sig	Homeostasis 2	DAM1
CPI-SS0CCB5F46B	NLGN4Y_NRXN1	NLGN4Y	NRXN1	Signaling by Neuroligin	0	0	0.5782	15.827	AD	sig	Homeostasis 2	Homeostasis 1
CPI-SS0CCB5F46B	NLGN4Y_NRXN1	NLGN4Y	NRXN1	Signaling by Neuroligin	0	0	0.5109	10.394	AD	sig	Homeostasis 2	T cell
CPI-SS0CCB5F46B	NLGN4Y_NRXN1	NLGN4Y	NRXN1	Signaling by Neuroligin	0	0	0.5265	11.65	AD	sig	Homeostasis 2	Macrophage
CPI-SS0CCB5F46B	NLGN4Y_NRXN1	NLGN4Y	NRXN1	Signaling by Neuroligin	0	0	0.5174	10.918	AD	sig	Homeostasis 2	Monocyte
CPI-SS0CCB5F46B	NLGN4Y_NRXN1	NLGN4Y	NRXN1	Signaling by Neuroligin	0	0	0.5192	11.064	AD	sig	Homeostasis 2	Proliferation
CPI-SS0CCB5F46B	NLGN4Y_NRXN1	NLGN4Y	NRXN1	Signaling by Neuroligin	0	0	0.4891	8.636	AD	sig	Homeostasis 2	Tau Microglia
CPI-SS0CCB5F46B	NLGN4Y_NRXN1	NLGN4Y	NRXN1	Signaling by Neuroligin	0	0	0.6357	14.322	AD	sig	Inflammation	DAM1
CPI-SS0CCB5F46B	NLGN4Y_NRXN1	NLGN4Y	NRXN1	Signaling by Neuroligin	0	0	0.7368	29.584	AD	sig	Inflammation	Homeostasis 1
CPI-SS0CCB5F46B	NLGN4Y_NRXN1	NLGN4Y	NRXN1	Signaling by Neuroligin	0	0	0.5408	0	AD	sig	Inflammation	Homeostasis 2
CPI-SS0CCB5F46B	NLGN4Y_NRXN1	NLGN4Y	NRXN1	Signaling by Neuroligin	0	0	0.5935	7.948	AD	sig	Inflammation	Inflammation
CPI-SS0CCB5F46B	NLGN4Y_NRXN1	NLGN4Y	NRXN1	Signaling by Neuroligin	0	0	0.6695	19.428	AD	sig	Inflammation	T cell
CPI-SS0CCB5F46B	NLGN4Y_NRXN1	NLGN4Y	NRXN1	Signaling by Neuroligin	0	0	0.6027	9.343	AD	sig	Inflammation	MHC 1
CPI-SS0CCB5F46B	NLGN4Y_NRXN1	NLGN4Y	NRXN1	Signaling by Neuroligin	0	0	0.5573	2.491	AD	sig	Inflammation	MHC 2
CPI-SS0CCB5F46B	NLGN4Y_NRXN1	NLGN4Y	NRXN1	Signaling by Neuroligin	0	0	0.6851	21.776	AD	sig	Inflammation	Macrophage
CPI-SS0CCB5F46B	NLGN4Y_NRXN1	NLGN4Y	NRXN1	Signaling by Neuroligin	0	0	0.676	20.407	AD	sig	Inflammation	Monocyte
CPI-SS0CCB5F46B	NLGN4Y_NRXN1	NLGN4Y	NRXN1	Signaling by Neuroligin	0	0	0.6778	20.681	AD	sig	Inflammation	Proliferation
CPI-SS0CCB5F46B	NLGN4Y_NRXN1	NLGN4Y	NRXN1	Signaling by Neuroligin	0	0	0.6478	16.142	AD	sig	Inflammation	Tau Microglia
CPI-SS0CCB5F46B	NLGN4Y_NRXN1	NLGN4Y	NRXN1	Signaling by Neuroligin	0	0	0.4831	7.58	AD	sig	MHC 1	Homeostasis 1
CPI-SS0CCB5F46B	NLGN4Y_NRXN1	NLGN4Y	NRXN1	Signaling by Neuroligin	0	0	0.5205	10.824	AD	sig	MHC 2	Homeostasis 1
CPI-SS0CCB5F46B	NLGN4Y_NRXN1	NLGN4Y	NRXN1	Signaling by Neuroligin	0	0	0.5128	9.162	AD	sig	Proliferation	DAM1
CPI-SS0CCB5F46B	NLGN4Y_NRXN1	NLGN4Y	NRXN1	Signaling by Neuroligin	0	0	0.6139	18.925	AD	sig	Proliferation	Homeostasis 1
CPI-SS0CCB5F46B	NLGN4Y_NRXN1	NLGN4Y	NRXN1	Signaling by Neuroligin	0.0002	0.0024	0.4706	5.084	AD	sig	Proliferation	Inflammation
CPI-SS0CCB5F46B	NLGN4Y_NRXN1	NLGN4Y	NRXN1	Signaling by Neuroligin	0	0	0.5466	12.428	AD	sig	Proliferation	T cell
CPI-SS0CCB5F46B	NLGN4Y_NRXN1	NLGN4Y	NRXN1	Signaling by Neuroligin	0	0	0.4798	5.977	AD	sig	Proliferation	MHC 1
CPI-SS0CCB5F46B	NLGN4Y_NRXN1	NLGN4Y	NRXN1	Signaling by Neuroligin	0	0	0.5622	13.931	AD	sig	Proliferation	Macrophage
CPI-SS0CCB5F46B	NLGN4Y_NRXN1	NLGN4Y	NRXN1	Signaling by Neuroligin	0	0	0.5531	13.055	AD	sig	Proliferation	Monocyte
CPI-SS0CCB5F46B	NLGN4Y_NRXN1	NLGN4Y	NRXN1	Signaling by Neuroligin	0	0	0.5549	13.23	AD	sig	Proliferation	Proliferation
CPI-SS0CCB5F46B	NLGN4Y_NRXN1	NLGN4Y	NRXN1	Signaling by Neuroligin	0	0	0.5249	10.326	AD	sig	Proliferation	Tau Microglia
CPI-SS0CCB5F46B	NLGN4Y_NRXN1	NLGN4Y	NRXN1	Signaling by Neuroligin	0	0	0.4831	7.58	AD	sig	Tau Microglia	Homeostasis 1
CPI-SS0BF9265F0	CLSTN1_NRXN2	CLSTN1	NRXN2	Signaling by Calsyntenin	0	0	0.2414	20.44	AD	sig	Homeostasis 1	DAM1
CPI-SS0BF9265F0	CLSTN1_NRXN2	CLSTN1	NRXN2	Signaling by Calsyntenin	0	0	0.2615	43.095	AD	sig	Homeostasis 1	Homeostasis 1
CPI-SS0BF9265F0	CLSTN1_NRXN2	CLSTN1	NRXN2	Signaling by Calsyntenin	0	0	0.2366	15.117	AD	sig	Homeostasis 1	Homeostasis 2
CPI-SS0BF9265F0	CLSTN1_NRXN2	CLSTN1	NRXN2	Signaling by Calsyntenin	0	0	0.2325	10.502	AD	sig	Homeostasis 1	Inflammation
CPI-SS0BF9265F0	CLSTN1_NRXN2	CLSTN1	NRXN2	Signaling by Calsyntenin	0	0	0.2349	13.159	AD	sig	Homeostasis 1	T cell
CPI-SS0BF9265F0	CLSTN1_NRXN2	CLSTN1	NRXN2	Signaling by Calsyntenin	0	0	0.2466	26.271	AD	sig	Homeostasis 1	MHC 1
CPI-SS0BF9265F0	CLSTN1_NRXN2	CLSTN1	NRXN2	Signaling by Calsyntenin	0	0	0.2484	28.387	AD	sig	Homeostasis 1	MHC 2
CPI-SS0BF9265F0	CLSTN1_NRXN2	CLSTN1	NRXN2	Signaling by Calsyntenin	0	0	0.2444	23.88	AD	sig	Homeostasis 1	Macrophage
CPI-SS0BF9265F0	CLSTN1_NRXN2	CLSTN1	NRXN2	Signaling by Calsyntenin	0	0	0.2607	42.13	AD	sig	Homeostasis 1	Monocyte
CPI-SS0BF9265F0	CLSTN1_NRXN2	CLSTN1	NRXN2	Signaling by Calsyntenin	0	0	0.2563	37.197	AD	sig	Homeostasis 1	Proliferation
CPI-SS0BF9265F0	CLSTN1_NRXN2	CLSTN1	NRXN2	Signaling by Calsyntenin	0	0	0.2417	20.79	AD	sig	Homeostasis 1	Tau Microglia
CPI-SS0BF9265F0	CLSTN1_NRXN2	CLSTN1	NRXN2	Signaling by Calsyntenin	0	0	0.2267	29.413	AD	sig	MHC 1	Homeostasis 1
CPI-SS0BF9265F0	CLSTN1_NRXN2	CLSTN1	NRXN2	Signaling by Calsyntenin	0	0	0.2258	28.754	AD	sig	MHC 1	Monocyte
CPI-SS0BF9265F0	CLSTN1_NRXN2	CLSTN1	NRXN2	Signaling by Calsyntenin	0.0027	0.0284	0.2214	25.387	AD	sig	MHC 1	Proliferation
CPI-SS0BF9265F0	CLSTN1_NRXN2	CLSTN1	NRXN2	Signaling by Calsyntenin	0	0	0.2438	20.884	AD	sig	Proliferation	DAM1
[truncated: 20,826 more rows]

## Sheet: AD-specifc LRs
AD-specific Ligand-Receptors (LRs) (AD vs. Normal/Resilience)
id_cp_interaction	interacting_pair	celltypeA_source	celltypeB_target	classification	AD	PART	Normal	Resilience
CPI-SS0889E281D	CADM1_CADM1	DAM1	Homeostasis 2	Adhesion by CADM	sig	non-sig	non-sig	non-sig
CPI-SS0889E281D	CADM1_CADM1	DAM1	Monocyte	Adhesion by CADM	sig	non-sig	non-sig	non-sig
CPI-SS0889E281D	CADM1_CADM1	DAM1	Tau Microglia	Adhesion by CADM	sig	sig	non-sig	non-sig
CPI-SS0889E281D	CADM1_CADM1	Homeostasis 2	DAM1	Adhesion by CADM	sig	non-sig	non-sig	non-sig
CPI-SS0889E281D	CADM1_CADM1	Inflammation	Inflammation	Adhesion by CADM	sig	non-sig	non-sig	non-sig
CPI-SS0889E281D	CADM1_CADM1	Inflammation	T cell	Adhesion by CADM	sig	non-sig	non-sig	non-sig
CPI-SS0889E281D	CADM1_CADM1	Inflammation	MHC 1	Adhesion by CADM	sig	non-sig	non-sig	non-sig
CPI-SS0889E281D	CADM1_CADM1	Inflammation	Macrophage	Adhesion by CADM	sig	non-sig	non-sig	non-sig
CPI-SS0889E281D	CADM1_CADM1	Inflammation	Proliferation	Adhesion by CADM	sig	non-sig	non-sig	non-sig
CPI-SS0889E281D	CADM1_CADM1	T cell	Inflammation	Adhesion by CADM	sig	non-sig	non-sig	non-sig
CPI-SS0889E281D	CADM1_CADM1	MHC 1	Inflammation	Adhesion by CADM	sig	non-sig	non-sig	non-sig
CPI-SS0889E281D	CADM1_CADM1	Macrophage	Inflammation	Adhesion by CADM	sig	non-sig	non-sig	non-sig
CPI-SS0889E281D	CADM1_CADM1	Monocyte	DAM1	Adhesion by CADM	sig	non-sig	non-sig	non-sig
CPI-SS0889E281D	CADM1_CADM1	Proliferation	Inflammation	Adhesion by CADM	sig	non-sig	non-sig	non-sig
CPI-SS0889E281D	CADM1_CADM1	Tau Microglia	DAM1	Adhesion by CADM	sig	sig	non-sig	non-sig
CPI-SS09C06644C	CADM3_CADM1	DAM1	Inflammation	Adhesion by CADM	sig	non-sig	non-sig	non-sig
CPI-SS09C06644C	CADM3_CADM1	Homeostasis 1	Inflammation	Adhesion by CADM	sig	non-sig	non-sig	non-sig
CPI-SS09C06644C	CADM3_CADM1	Homeostasis 2	DAM1	Adhesion by CADM	sig	non-sig	non-sig	non-sig
CPI-SS09C06644C	CADM3_CADM1	Homeostasis 2	Inflammation	Adhesion by CADM	sig	non-sig	non-sig	non-sig
CPI-SS09C06644C	CADM3_CADM1	Inflammation	DAM1	Adhesion by CADM	sig	sig	non-sig	non-sig
CPI-SS09C06644C	CADM3_CADM1	Inflammation	Inflammation	Adhesion by CADM	sig	non-sig	non-sig	non-sig
CPI-SS09C06644C	CADM3_CADM1	T cell	DAM1	Adhesion by CADM	sig	sig	non-sig	non-sig
CPI-SS09C06644C	CADM3_CADM1	T cell	Inflammation	Adhesion by CADM	sig	non-sig	non-sig	non-sig
CPI-SS09C06644C	CADM3_CADM1	T cell	MHC 1	Adhesion by CADM	sig	non-sig	non-sig	non-sig
CPI-SS09C06644C	CADM3_CADM1	MHC 1	Inflammation	Adhesion by CADM	sig	non-sig	non-sig	non-sig
CPI-SS09C06644C	CADM3_CADM1	Macrophage	Inflammation	Adhesion by CADM	sig	non-sig	non-sig	non-sig
CPI-SS09C06644C	CADM3_CADM1	Macrophage	MHC 1	Adhesion by CADM	sig	non-sig	non-sig	non-sig
CPI-SS09C06644C	CADM3_CADM1	Monocyte	Inflammation	Adhesion by CADM	sig	non-sig	non-sig	non-sig
CPI-SS09C06644C	CADM3_CADM1	Monocyte	MHC 1	Adhesion by CADM	sig	non-sig	non-sig	non-sig
CPI-SS09C06644C	CADM3_CADM1	Proliferation	Inflammation	Adhesion by CADM	sig	non-sig	non-sig	non-sig
CPI-SS09C06644C	CADM3_CADM1	Proliferation	MHC 1	Adhesion by CADM	sig	non-sig	non-sig	non-sig
CPI-SS09C06644C	CADM3_CADM1	Tau Microglia	Inflammation	Adhesion by CADM	sig	non-sig	non-sig	non-sig
CPI-SS09C06644C	CADM3_CADM1	Tau Microglia	MHC 1	Adhesion by CADM	sig	non-sig	non-sig	non-sig
CPI-SS0C9696AAA	CRTAM_CADM1	T cell	Inflammation		sig	sig	non-sig	non-sig
CPI-SS0B990492C	CADM1_NECTIN3	DAM1	Inflammation	Adhesion by CADM	sig	sig	non-sig	non-sig
CPI-SS0B990492C	CADM1_NECTIN3	DAM1	Macrophage	Adhesion by CADM	sig	non-sig	non-sig	non-sig
CPI-SS0B990492C	CADM1_NECTIN3	DAM1	Monocyte	Adhesion by CADM	sig	non-sig	non-sig	non-sig
CPI-SS0B990492C	CADM1_NECTIN3	Inflammation	DAM1	Adhesion by CADM	sig	non-sig	non-sig	non-sig
CPI-SS0B990492C	CADM1_NECTIN3	Inflammation	Homeostasis 2	Adhesion by CADM	sig	non-sig	non-sig	non-sig
CPI-SS0B990492C	CADM1_NECTIN3	Inflammation	Inflammation	Adhesion by CADM	sig	non-sig	non-sig	non-sig
CPI-SS0B990492C	CADM1_NECTIN3	Inflammation	MHC 1	Adhesion by CADM	sig	non-sig	non-sig	non-sig
CPI-SS0B990492C	CADM1_NECTIN3	Inflammation	MHC 2	Adhesion by CADM	sig	non-sig	non-sig	non-sig
CPI-SS0B990492C	CADM1_NECTIN3	Inflammation	Tau Microglia	Adhesion by CADM	sig	non-sig	non-sig	non-sig
CPI-SS0B990492C	CADM1_NECTIN3	T cell	Proliferation	Adhesion by CADM	sig	sig	non-sig	non-sig
CPI-SS0B990492C	CADM1_NECTIN3	MHC 1	Homeostasis 2	Adhesion by CADM	sig	non-sig	non-sig	non-sig
CPI-SS0B990492C	CADM1_NECTIN3	MHC 1	Inflammation	Adhesion by CADM	sig	non-sig	non-sig	non-sig
CPI-SS0B990492C	CADM1_NECTIN3	Macrophage	Proliferation	Adhesion by CADM	sig	non-sig	non-sig	non-sig
CPI-SS02FBD007E	NECTIN2_NECTIN3	Homeostasis 1	Proliferation	Adhesion by Nectin	sig	sig	non-sig	non-sig
CPI-SS02FBD007E	NECTIN2_NECTIN3	MHC 2	Proliferation	Adhesion by Nectin	sig	non-sig	non-sig	non-sig
CPI-SS02FBD007E	NECTIN2_NECTIN3	Macrophage	Homeostasis 2	Adhesion by Nectin	sig	sig	non-sig	non-sig
CPI-SS02FBD007E	NECTIN2_NECTIN3	Monocyte	Homeostasis 2	Adhesion by Nectin	sig	non-sig	non-sig	non-sig
CPI-SS02FBD007E	NECTIN2_NECTIN3	Proliferation	Homeostasis 2	Adhesion by Nectin	sig	sig	non-sig	non-sig
CPI-SS09C0B8677	TGM2_ADGRG1	MHC 2	Homeostasis 1		sig	non-sig	non-sig	non-sig
CPI-SS09C0B8677	TGM2_ADGRG1	MHC 2	Homeostasis 2		sig	non-sig	non-sig	non-sig
CPI-SS09C0B8677	TGM2_ADGRG1	MHC 2	MHC 2		sig	non-sig	non-sig	non-sig
CPI-SS09C0B8677	TGM2_ADGRG1	Monocyte	Homeostasis 2		sig	non-sig	non-sig	non-sig
CPI-SS015BF69EE	COL4A1_ADGRG6	Inflammation	Macrophage	Adhesion by Collagen/Integrin	sig	non-sig	non-sig	non-sig
CPI-SS01771D11B	COL4A2_ADGRG6	Homeostasis 2	Macrophage	Adhesion by Collagen/Integrin	sig	non-sig	non-sig	non-sig
CPI-SS0AADAB219	COL4A3_ADGRG6	Monocyte	Macrophage	Adhesion by Collagen/Integrin	sig	non-sig	non-sig	non-sig
CPI-SS0AADAB219	COL4A3_ADGRG6	Proliferation	Macrophage	Adhesion by Collagen/Integrin	sig	sig	non-sig	non-sig
CPI-SS06D2944B5	COL4A4_ADGRG6	MHC 1	Macrophage	Adhesion by Collagen/Integrin	sig	sig	non-sig	non-sig
CPI-SS0087B834D	PRNP_ADGRG6	Homeostasis 1	Homeostasis 2		sig	non-sig	non-sig	non-sig
CPI-SS0087B834D	PRNP_ADGRG6	Homeostasis 1	Inflammation		sig	non-sig	non-sig	non-sig
CPI-SS0087B834D	PRNP_ADGRG6	MHC 1	DAM1		sig	non-sig	non-sig	non-sig
CPI-SS0087B834D	PRNP_ADGRG6	MHC 1	MHC 1		sig	non-sig	non-sig	non-sig
CPI-SS0087B834D	PRNP_ADGRG6	MHC 1	Proliferation		sig	non-sig	non-sig	non-sig
CPI-SS0087B834D	PRNP_ADGRG6	MHC 1	Tau Microglia		sig	non-sig	non-sig	non-sig
CPI-SS0087B834D	PRNP_ADGRG6	Proliferation	DAM1		sig	non-sig	non-sig	non-sig
CPI-SS0087B834D	PRNP_ADGRG6	Proliferation	MHC 1		sig	non-sig	non-sig	non-sig
CPI-SS0087B834D	PRNP_ADGRG6	Proliferation	Proliferation		sig	non-sig	non-sig	non-sig
CPI-SS0D9DE7106	DAG1_NRXN3	DAM1	Proliferation		sig	non-sig	non-sig	non-sig
CPI-SS0D9DE7106	DAG1_NRXN3	Homeostasis 1	Proliferation		sig	non-sig	non-sig	non-sig
CPI-SS0D9DE7106	DAG1_NRXN3	Homeostasis 2	Proliferation		sig	non-sig	non-sig	non-sig
CPI-SS0D9DE7106	DAG1_NRXN3	Inflammation	Proliferation		sig	non-sig	non-sig	non-sig
CPI-SS0D9DE7106	DAG1_NRXN3	T cell	Proliferation		sig	non-sig	non-sig	non-sig
CPI-SS0D9DE7106	DAG1_NRXN3	MHC 1	Proliferation		sig	non-sig	non-sig	non-sig
CPI-SS0D9DE7106	DAG1_NRXN3	MHC 2	Proliferation		sig	non-sig	non-sig	non-sig
CPI-SS0D9DE7106	DAG1_NRXN3	Macrophage	Proliferation		sig	non-sig	non-sig	non-sig
CPI-SS0D9DE7106	DAG1_NRXN3	Monocyte	Proliferation		sig	non-sig	non-sig	non-sig
CPI-SS0D9DE7106	DAG1_NRXN3	Proliferation	MHC 1		sig	non-sig	non-sig	non-sig
CPI-SS0D9DE7106	DAG1_NRXN3	Proliferation	Monocyte		sig	non-sig	non-sig	non-sig
CPI-SS0D9DE7106	DAG1_NRXN3	Tau Microglia	Proliferation		sig	non-sig	non-sig	non-sig
CPI-SS0DD3733E8	CLSTN1_NRXN3	DAM1	Proliferation	Signaling by Calsyntenin	sig	non-sig	non-sig	non-sig
CPI-SS0DD3733E8	CLSTN1_NRXN3	Homeostasis 1	MHC 1	Signaling by Calsyntenin	sig	non-sig	non-sig	non-sig
CPI-SS0DD3733E8	CLSTN1_NRXN3	Homeostasis 2	Proliferation	Signaling by Calsyntenin	sig	non-sig	non-sig	non-sig
CPI-SS0DD3733E8	CLSTN1_NRXN3	Inflammation	Homeostasis 1	Signaling by Calsyntenin	sig	non-sig	non-sig	non-sig
CPI-SS0DD3733E8	CLSTN1_NRXN3	T cell	Proliferation	Signaling by Calsyntenin	sig	non-sig	non-sig	non-sig
CPI-SS0DD3733E8	CLSTN1_NRXN3	MHC 1	Proliferation	Signaling by Calsyntenin	sig	non-sig	non-sig	non-sig
CPI-SS0DD3733E8	CLSTN1_NRXN3	Macrophage	Homeostasis 1	Signaling by Calsyntenin	sig	non-sig	non-sig	non-sig
CPI-SS0DD3733E8	CLSTN1_NRXN3	Monocyte	Homeostasis 1	Signaling by Calsyntenin	sig	non-sig	non-sig	non-sig
CPI-SS0DD3733E8	CLSTN1_NRXN3	Monocyte	Proliferation	Signaling by Calsyntenin	sig	non-sig	non-sig	non-sig
CPI-SS0DD3733E8	CLSTN1_NRXN3	Proliferation	MHC 1	Signaling by Calsyntenin	sig	non-sig	non-sig	non-sig
CPI-SS0DD3733E8	CLSTN1_NRXN3	Proliferation	Monocyte	Signaling by Calsyntenin	sig	non-sig	non-sig	non-sig
CPI-SS0DD3733E8	CLSTN1_NRXN3	Proliferation	Proliferation	Signaling by Calsyntenin	sig	non-sig	non-sig	non-sig
CPI-SS0DD3733E8	CLSTN1_NRXN3	Tau Microglia	Proliferation	Signaling by Calsyntenin	sig	non-sig	non-sig	non-sig
CPI-SS01A7DC3C1	CLSTN2_NRXN3	DAM1	Proliferation	Signaling by Calsyntenin	sig	non-sig	non-sig	non-sig
CPI-SS01A7DC3C1	CLSTN2_NRXN3	Homeostasis 1	MHC 1	Signaling by Calsyntenin	sig	non-sig	non-sig	non-sig
CPI-SS01A7DC3C1	CLSTN2_NRXN3	Homeostasis 1	Proliferation	Signaling by Calsyntenin	sig	non-sig	non-sig	non-sig
CPI-SS01A7DC3C1	CLSTN2_NRXN3	Homeostasis 2	Proliferation	Signaling by Calsyntenin	sig	non-sig	non-sig	non-sig
CPI-SS01A7DC3C1	CLSTN2_NRXN3	Inflammation	Proliferation	Signaling by Calsyntenin	sig	non-sig	non-sig	non-sig
CPI-SS01A7DC3C1	CLSTN2_NRXN3	T cell	Proliferation	Signaling by Calsyntenin	sig	non-sig	non-sig	non-sig
CPI-SS01A7DC3C1	CLSTN2_NRXN3	MHC 1	Proliferation	Signaling by Calsyntenin	sig	non-sig	non-sig	non-sig
CPI-SS01A7DC3C1	CLSTN2_NRXN3	Macrophage	Proliferation	Signaling by Calsyntenin	sig	non-sig	non-sig	non-sig
CPI-SS01A7DC3C1	CLSTN2_NRXN3	Tau Microglia	Proliferation	Signaling by Calsyntenin	sig	non-sig	non-sig	non-sig
CPI-SS0180FFBED	CLSTN3_NRXN3	DAM1	Proliferation	Signaling by Calsyntenin	sig	non-sig	non-sig	non-sig
CPI-SS0180FFBED	CLSTN3_NRXN3	Homeostasis 1	MHC 1	Signaling by Calsyntenin	sig	non-sig	non-sig	non-sig
CPI-SS0180FFBED	CLSTN3_NRXN3	Homeostasis 2	Proliferation	Signaling by Calsyntenin	sig	non-sig	non-sig	non-sig
CPI-SS0180FFBED	CLSTN3_NRXN3	Inflammation	Proliferation	Signaling by Calsyntenin	sig	non-sig	non-sig	non-sig
CPI-SS0180FFBED	CLSTN3_NRXN3	T cell	MHC 1	Signaling by Calsyntenin	sig	non-sig	non-sig	non-sig
CPI-SS0180FFBED	CLSTN3_NRXN3	MHC 1	Proliferation	Signaling by Calsyntenin	sig	non-sig	non-sig	non-sig
CPI-SS0180FFBED	CLSTN3_NRXN3	Macrophage	Proliferation	Signaling by Calsyntenin	sig	non-sig	non-sig	non-sig
CPI-SS0180FFBED	CLSTN3_NRXN3	Monocyte	MHC 1	Signaling by Calsyntenin	sig	non-sig	non-sig	non-sig
CPI-SS0180FFBED	CLSTN3_NRXN3	Proliferation	Proliferation	Signaling by Calsyntenin	sig	non-sig	non-sig	non-sig
CPI-SS0180FFBED	CLSTN3_NRXN3	Tau Microglia	Proliferation	Signaling by Calsyntenin	sig	non-sig	non-sig	non-sig
CPI-SS0C0329180	LRRTM2_NRXN3	Homeostasis 1	Proliferation	Signaling by Leucine-Rich Repeat Transmembrane Neuronal Protein	sig	non-sig	non-sig	non-sig
CPI-SS0C0329180	LRRTM2_NRXN3	MHC 1	Proliferation	Signaling by Leucine-Rich Repeat Transmembrane Neuronal Protein	sig	non-sig	non-sig	non-sig
CPI-SS0C0329180	LRRTM2_NRXN3	Macrophage	Proliferation	Signaling by Leucine-Rich Repeat Transmembrane Neuronal Protein	sig	non-sig	non-sig	non-sig
CPI-SS0C0329180	LRRTM2_NRXN3	Monocyte	Proliferation	Signaling by Leucine-Rich Repeat Transmembrane Neuronal Protein	sig	non-sig	non-sig	non-sig
CPI-SS0C0329180	LRRTM2_NRXN3	Proliferation	Proliferation	Signaling by Leucine-Rich Repeat Transmembrane Neuronal Protein	sig	non-sig	non-sig	non-sig
CPI-SS026EC3854	LRRTM3_NRXN3	DAM1	Proliferation	Signaling by Leucine-Rich Repeat Transmembrane Neuronal Protein	sig	non-sig	non-sig	non-sig
CPI-SS026EC3854	LRRTM3_NRXN3	Homeostasis 1	MHC 1	Signaling by Leucine-Rich Repeat Transmembrane Neuronal Protein	sig	non-sig	non-sig	non-sig
CPI-SS026EC3854	LRRTM3_NRXN3	Homeostasis 2	Proliferation	Signaling by Leucine-Rich Repeat Transmembrane Neuronal Protein	sig	non-sig	non-sig	non-sig
CPI-SS026EC3854	LRRTM3_NRXN3	Inflammation	Proliferation	Signaling by Leucine-Rich Repeat Transmembrane Neuronal Protein	sig	non-sig	non-sig	non-sig
CPI-SS026EC3854	LRRTM3_NRXN3	T cell	Proliferation	Signaling by Leucine-Rich Repeat Transmembrane Neuronal Protein	sig	non-sig	non-sig	non-sig
CPI-SS026EC3854	LRRTM3_NRXN3	MHC 1	Proliferation	Signaling by Leucine-Rich Repeat Transmembrane Neuronal Protein	sig	non-sig	non-sig	non-sig
CPI-SS026EC3854	LRRTM3_NRXN3	MHC 2	Proliferation	Signaling by Leucine-Rich Repeat Transmembrane Neuronal Protein	sig	non-sig	non-sig	non-sig
CPI-SS026EC3854	LRRTM3_NRXN3	Macrophage	Proliferation	Signaling by Leucine-Rich Repeat Transmembrane Neuronal Protein	sig	non-sig	non-sig	non-sig
CPI-SS026EC3854	LRRTM3_NRXN3	Proliferation	Proliferation	Signaling by Leucine-Rich Repeat Transmembrane Neuronal Protein	sig	non-sig	non-sig	non-sig
CPI-SS026EC3854	LRRTM3_NRXN3	Tau Microglia	Proliferation	Signaling by Leucine-Rich Repeat Transmembrane Neuronal Protein	sig	non-sig	non-sig	non-sig
CPI-SS0F97A06CD	LRRTM4_NRXN3	DAM1	Homeostasis 1	Signaling by Leucine-Rich Repeat Transmembrane Neuronal Protein	sig	non-sig	non-sig	non-sig
CPI-SS0F97A06CD	LRRTM4_NRXN3	Homeostasis 1	DAM1	Signaling by Leucine-Rich Repeat Transmembrane Neuronal Protein	sig	non-sig	non-sig	non-sig
CPI-SS0F97A06CD	LRRTM4_NRXN3	Homeostasis 1	Homeostasis 2	Signaling by Leucine-Rich Repeat Transmembrane Neuronal Protein	sig	non-sig	non-sig	non-sig
CPI-SS0F97A06CD	LRRTM4_NRXN3	Homeostasis 1	MHC 1	Signaling by Leucine-Rich Repeat Transmembrane Neuronal Protein	sig	non-sig	non-sig	non-sig
CPI-SS0F97A06CD	LRRTM4_NRXN3	Homeostasis 2	Homeostasis 1	Signaling by Leucine-Rich Repeat Transmembrane Neuronal Protein	sig	non-sig	non-sig	non-sig
CPI-SS0F97A06CD	LRRTM4_NRXN3	T cell	Homeostasis 1	Signaling by Leucine-Rich Repeat Transmembrane Neuronal Protein	sig	non-sig	non-sig	non-sig
CPI-SS0F97A06CD	LRRTM4_NRXN3	MHC 1	Proliferation	Signaling by Leucine-Rich Repeat Transmembrane Neuronal Protein	sig	non-sig	non-sig	non-sig
CPI-SS0F97A06CD	LRRTM4_NRXN3	MHC 2	Homeostasis 1	Signaling by Leucine-Rich Repeat Transmembrane Neuronal Protein	sig	non-sig	non-sig	non-sig
CPI-SS0F97A06CD	LRRTM4_NRXN3	MHC 2	Proliferation	Signaling by Leucine-Rich Repeat Transmembrane Neuronal Protein	sig	non-sig	non-sig	non-sig
CPI-SS0F97A06CD	LRRTM4_NRXN3	Macrophage	Proliferation	Signaling by Leucine-Rich Repeat Transmembrane Neuronal Protein	sig	non-sig	non-sig	non-sig
CPI-SS0F97A06CD	LRRTM4_NRXN3	Proliferation	Monocyte	Signaling by Leucine-Rich Repeat Transmembrane Neuronal Protein	sig	non-sig	non-sig	non-sig
CPI-SS0F97A06CD	LRRTM4_NRXN3	Tau Microglia	Homeostasis 1	Signaling by Leucine-Rich Repeat Transmembrane Neuronal Protein	sig	non-sig	non-sig	non-sig
CPI-SS0731F750C	NLGN1_NRXN3	DAM1	Proliferation	Signaling by Neuroligin	sig	non-sig	non-sig	non-sig
CPI-SS0731F750C	NLGN1_NRXN3	Homeostasis 1	MHC 1	Signaling by Neuroligin	sig	non-sig	non-sig	non-sig
CPI-SS0731F750C	NLGN1_NRXN3	Homeostasis 2	Homeostasis 1	Signaling by Neuroligin	sig	non-sig	non-sig	non-sig
CPI-SS0731F750C	NLGN1_NRXN3	Homeostasis 2	Proliferation	Signaling by Neuroligin	sig	non-sig	non-sig	non-sig
CPI-SS0731F750C	NLGN1_NRXN3	Inflammation	Homeostasis 1	Signaling by Neuroligin	sig	sig	non-sig	non-sig
CPI-SS0731F750C	NLGN1_NRXN3	T cell	Homeostasis 1	Signaling by Neuroligin	sig	non-sig	non-sig	non-sig
CPI-SS0731F750C	NLGN1_NRXN3	T cell	Proliferation	Signaling by Neuroligin	sig	non-sig	non-sig	non-sig
CPI-SS0731F750C	NLGN1_NRXN3	MHC 1	Proliferation	Signaling by Neuroligin	sig	non-sig	non-sig	non-sig
CPI-SS0731F750C	NLGN1_NRXN3	Proliferation	Monocyte	Signaling by Neuroligin	sig	non-sig	non-sig	non-sig
CPI-SS0731F750C	NLGN1_NRXN3	Proliferation	Proliferation	Signaling by Neuroligin	sig	non-sig	non-sig	non-sig
CPI-SS0C12FCB93	NLGN2_NRXN3	DAM1	Proliferation	Signaling by Neuroligin	sig	non-sig	non-sig	non-sig
CPI-SS0C12FCB93	NLGN2_NRXN3	Homeostasis 1	Proliferation	Signaling by Neuroligin	sig	non-sig	non-sig	non-sig
CPI-SS0C12FCB93	NLGN2_NRXN3	Inflammation	Proliferation	Signaling by Neuroligin	sig	non-sig	non-sig	non-sig
CPI-SS0C12FCB93	NLGN2_NRXN3	T cell	Proliferation	Signaling by Neuroligin	sig	non-sig	non-sig	non-sig
CPI-SS0C12FCB93	NLGN2_NRXN3	MHC 1	Proliferation	Signaling by Neuroligin	sig	non-sig	non-sig	non-sig
CPI-SS0C12FCB93	NLGN2_NRXN3	MHC 2	Proliferation	Signaling by Neuroligin	sig	non-sig	non-sig	non-sig
CPI-SS0C12FCB93	NLGN2_NRXN3	Macrophage	Proliferation	Signaling by Neuroligin	sig	non-sig	non-sig	non-sig
CPI-SS0C12FCB93	NLGN2_NRXN3	Monocyte	Proliferation	Signaling by Neuroligin	sig	non-sig	non-sig	non-sig
CPI-SS0C12FCB93	NLGN2_NRXN3	Proliferation	Proliferation	Signaling by Neuroligin	sig	non-sig	non-sig	non-sig
CPI-SS0C12FCB93	NLGN2_NRXN3	Tau Microglia	Proliferation	Signaling by Neuroligin	sig	non-sig	non-sig	non-sig
CPI-SS07FBAAD8D	NLGN3_NRXN3	DAM1	Proliferation	Signaling by Neuroligin	sig	non-sig	non-sig	non-sig
CPI-SS07FBAAD8D	NLGN3_NRXN3	Homeostasis 1	Proliferation	Signaling by Neuroligin	sig	non-sig	non-sig	non-sig
CPI-SS07FBAAD8D	NLGN3_NRXN3	Homeostasis 2	Proliferation	Signaling by Neuroligin	sig	non-sig	non-sig	non-sig
CPI-SS07FBAAD8D	NLGN3_NRXN3	Inflammation	Proliferation	Signaling by Neuroligin	sig	non-sig	non-sig	non-sig
CPI-SS07FBAAD8D	NLGN3_NRXN3	T cell	Proliferation	Signaling by Neuroligin	sig	non-sig	non-sig	non-sig
CPI-SS07FBAAD8D	NLGN3_NRXN3	MHC 1	Proliferation	Signaling by Neuroligin	sig	non-sig	non-sig	non-sig
CPI-SS07FBAAD8D	NLGN3_NRXN3	MHC 2	Proliferation	Signaling by Neuroligin	sig	non-sig	non-sig	non-sig
CPI-SS07FBAAD8D	NLGN3_NRXN3	Macrophage	Proliferation	Signaling by Neuroligin	sig	non-sig	non-sig	non-sig
CPI-SS07FBAAD8D	NLGN3_NRXN3	Monocyte	Proliferation	Signaling by Neuroligin	sig	non-sig	non-sig	non-sig
CPI-SS07FBAAD8D	NLGN3_NRXN3	Proliferation	Proliferation	Signaling by Neuroligin	sig	non-sig	non-sig	non-sig
CPI-SS07FBAAD8D	NLGN3_NRXN3	Tau Microglia	Proliferation	Signaling by Neuroligin	sig	non-sig	non-sig	non-sig
CPI-SS0F9118AB4	NLGN4X_NRXN3	DAM1	Proliferation	Signaling by Neuroligin	sig	non-sig	non-sig	non-sig
CPI-SS0F9118AB4	NLGN4X_NRXN3	Homeostasis 1	Proliferation	Signaling by Neuroligin	sig	non-sig	non-sig	non-sig
CPI-SS0F9118AB4	NLGN4X_NRXN3	Homeostasis 2	Homeostasis 1	Signaling by Neuroligin	sig	sig	non-sig	non-sig
CPI-SS0F9118AB4	NLGN4X_NRXN3	Homeostasis 2	Proliferation	Signaling by Neuroligin	sig	non-sig	non-sig	non-sig
CPI-SS0F9118AB4	NLGN4X_NRXN3	Inflammation	Proliferation	Signaling by Neuroligin	sig	non-sig	non-sig	non-sig
CPI-SS0F9118AB4	NLGN4X_NRXN3	T cell	Proliferation	Signaling by Neuroligin	sig	non-sig	non-sig	non-sig
CPI-SS0F9118AB4	NLGN4X_NRXN3	MHC 1	Proliferation	Signaling by Neuroligin	sig	non-sig	non-sig	non-sig
CPI-SS0F9118AB4	NLGN4X_NRXN3	MHC 2	Proliferation	Signaling by Neuroligin	sig	non-sig	non-sig	non-sig
CPI-SS0F9118AB4	NLGN4X_NRXN3	Macrophage	Proliferation	Signaling by Neuroligin	sig	non-sig	non-sig	non-sig
CPI-SS0F9118AB4	NLGN4X_NRXN3	Monocyte	Proliferation	Signaling by Neuroligin	sig	non-sig	non-sig	non-sig
CPI-SS0F9118AB4	NLGN4X_NRXN3	Proliferation	Proliferation	Signaling by Neuroligin	sig	non-sig	non-sig	non-sig
CPI-SS0F9118AB4	NLGN4X_NRXN3	Tau Microglia	Proliferation	Signaling by Neuroligin	sig	non-sig	non-sig	non-sig
CPI-SS0837C7966	NLGN4Y_NRXN3	DAM1	Proliferation		sig	non-sig	non-sig	non-sig
CPI-SS0837C7966	NLGN4Y_NRXN3	Homeostasis 1	Proliferation		sig	non-sig	non-sig	non-sig
CPI-SS0837C7966	NLGN4Y_NRXN3	Homeostasis 2	MHC 1		sig	non-sig	non-sig	non-sig
CPI-SS0837C7966	NLGN4Y_NRXN3	Inflammation	DAM1		sig	non-sig	non-sig	non-sig
CPI-SS0837C7966	NLGN4Y_NRXN3	Inflammation	Homeostasis 2		sig	non-sig	non-sig	non-sig
CPI-SS0837C7966	NLGN4Y_NRXN3	Inflammation	T cell		sig	non-sig	non-sig	non-sig
CPI-SS0837C7966	NLGN4Y_NRXN3	Inflammation	MHC 1		sig	non-sig	non-sig	non-sig
CPI-SS0837C7966	NLGN4Y_NRXN3	Inflammation	Tau Microglia		sig	non-sig	non-sig	non-sig
CPI-SS0837C7966	NLGN4Y_NRXN3	T cell	Homeostasis 1		sig	non-sig	non-sig	non-sig
CPI-SS0837C7966	NLGN4Y_NRXN3	T cell	Proliferation		sig	non-sig	non-sig	non-sig
CPI-SS0837C7966	NLGN4Y_NRXN3	Macrophage	Homeostasis 1		sig	non-sig	non-sig	non-sig
CPI-SS0837C7966	NLGN4Y_NRXN3	Macrophage	Proliferation		sig	non-sig	non-sig	non-sig
CPI-SS0837C7966	NLGN4Y_NRXN3	Monocyte	Homeostasis 1		sig	non-sig	non-sig	non-sig
CPI-SS0837C7966	NLGN4Y_NRXN3	Proliferation	Homeostasis 2		sig	non-sig	non-sig	non-sig
CPI-SC0C09120F1	ICAM1_integrin_aMb2_complex	Homeostasis 1	DAM1	Adhesion by ICAM	sig	non-sig	non-sig	non-sig
CPI-SC0C09120F1	ICAM1_integrin_aMb2_complex	Homeostasis 1	Homeostasis 1	Adhesion by ICAM	sig	sig	non-sig	non-sig
CPI-SC0C09120F1	ICAM1_integrin_aMb2_complex	Homeostasis 2	Homeostasis 1	Adhesion by ICAM	sig	non-sig	non-sig	non-sig
CPI-SC0C09120F1	ICAM1_integrin_aMb2_complex	T cell	Homeostasis 1	Adhesion by ICAM	sig	non-sig	non-sig	non-sig
CPI-SC0C09120F1	ICAM1_integrin_aMb2_complex	MHC 2	Homeostasis 1	Adhesion by ICAM	sig	non-sig	non-sig	non-sig
CPI-SC0C09120F1	ICAM1_integrin_aMb2_complex	MHC 2	Proliferation	Adhesion by ICAM	sig	non-sig	non-sig	non-sig
CPI-SC0C09120F1	ICAM1_integrin_aMb2_complex	Macrophage	Proliferation	Adhesion by ICAM	sig	non-sig	non-sig	non-sig
CPI-SC0C09120F1	ICAM1_integrin_aMb2_complex	Monocyte	DAM1	Adhesion by ICAM	sig	sig	non-sig	non-sig
CPI-SC0C09120F1	ICAM1_integrin_aMb2_complex	Monocyte	Homeostasis 1	Adhesion by ICAM	sig	sig	non-sig	non-sig
CPI-SC0C09120F1	ICAM1_integrin_aMb2_complex	Monocyte	Proliferation	Adhesion by ICAM	sig	non-sig	non-sig	non-sig
CPI-SC0C09120F1	ICAM1_integrin_aMb2_complex	Proliferation	Homeostasis 1	Adhesion by ICAM	sig	non-sig	non-sig	non-sig
CPI-SC0C09120F1	ICAM1_integrin_aMb2_complex	Tau Microglia	Homeostasis 1	Adhesion by ICAM	sig	non-sig	non-sig	non-sig
CPI-SC071B77A18	JAM3_integrin_aMb2_complex	DAM1	Homeostasis 1	Adhesion by JAM	sig	non-sig	non-sig	non-sig
CPI-SC071B77A18	JAM3_integrin_aMb2_complex	Homeostasis 1	Proliferation	Adhesion by JAM	sig	non-sig	non-sig	non-sig
CPI-SC071B77A18	JAM3_integrin_aMb2_complex	Homeostasis 2	DAM1	Adhesion by JAM	sig	non-sig	non-sig	non-sig
CPI-SC071B77A18	JAM3_integrin_aMb2_complex	Homeostasis 2	Homeostasis 1	Adhesion by JAM	sig	non-sig	non-sig	non-sig
CPI-SC071B77A18	JAM3_integrin_aMb2_complex	Homeostasis 2	Proliferation	Adhesion by JAM	sig	non-sig	non-sig	non-sig
CPI-SC071B77A18	JAM3_integrin_aMb2_complex	Inflammation	Homeostasis 1	Adhesion by JAM	sig	non-sig	non-sig	non-sig
CPI-SC071B77A18	JAM3_integrin_aMb2_complex	T cell	Homeostasis 1	Adhesion by JAM	sig	non-sig	non-sig	non-sig
CPI-SC071B77A18	JAM3_integrin_aMb2_complex	MHC 1	Homeostasis 1	Adhesion by JAM	sig	non-sig	non-sig	non-sig
CPI-SC071B77A18	JAM3_integrin_aMb2_complex	Macrophage	Homeostasis 1	Adhesion by JAM	sig	non-sig	non-sig	non-sig
CPI-SC071B77A18	JAM3_integrin_aMb2_complex	Monocyte	Homeostasis 1	Adhesion by JAM	sig	non-sig	non-sig	non-sig
CPI-SC071B77A18	JAM3_integrin_aMb2_complex	Proliferation	DAM1	Adhesion by JAM	sig	non-sig	non-sig	non-sig
CPI-SC071B77A18	JAM3_integrin_aMb2_complex	Proliferation	Homeostasis 1	Adhesion by JAM	sig	non-sig	non-sig	non-sig
CPI-SC071B77A18	JAM3_integrin_aMb2_complex	Proliferation	Proliferation	Adhesion by JAM	sig	non-sig	non-sig	non-sig
CPI-SC071B77A18	JAM3_integrin_aMb2_complex	Tau Microglia	Homeostasis 1	Adhesion by JAM	sig	sig	non-sig	non-sig
CPI-SC0C93C7670	C3_integrin_aMb2_complex	Homeostasis 1	T cell	Signaling by Complement	sig	non-sig	non-sig	non-sig
CPI-SC0C93C7670	C3_integrin_aMb2_complex	Homeostasis 1	Macrophage	Signaling by Complement	sig	non-sig	non-sig	non-sig
CPI-SC0C93C7670	C3_integrin_aMb2_complex	Homeostasis 2	T cell	Signaling by Complement	sig	sig	non-sig	non-sig
CPI-SC0C93C7670	C3_integrin_aMb2_complex	Homeostasis 2	Macrophage	Signaling by Complement	sig	sig	non-sig	non-sig
CPI-SC0C93C7670	C3_integrin_aMb2_complex	Inflammation	T cell	Signaling by Complement	sig	non-sig	non-sig	non-sig
CPI-SC0C93C7670	C3_integrin_aMb2_complex	Proliferation	DAM1	Signaling by Complement	sig	non-sig	non-sig	non-sig
CPI-SC0C93C7670	C3_integrin_aMb2_complex	Proliferation	Homeostasis 1	Signaling by Complement	sig	non-sig	non-sig	non-sig
CPI-SC0C93C7670	C3_integrin_aMb2_complex	Proliferation	MHC 1	Signaling by Complement	sig	non-sig	non-sig	non-sig
CPI-SC0C93C7670	C3_integrin_aMb2_complex	Proliferation	Proliferation	Signaling by Complement	sig	non-sig	non-sig	non-sig
CPI-SC003905460	THY1_integrin_aMb2_complex	DAM1	Homeostasis 1	Adhesion by antigen THY1	sig	non-sig	non-sig	non-sig
CPI-SC003905460	THY1_integrin_aMb2_complex	Homeostasis 1	MHC 1	Adhesion by antigen THY1	sig	non-sig	non-sig	non-sig
CPI-SC003905460	THY1_integrin_aMb2_complex	Homeostasis 1	Proliferation	Adhesion by antigen THY1	sig	non-sig	non-sig	non-sig
CPI-SC003905460	THY1_integrin_aMb2_complex	Homeostasis 2	Homeostasis 1	Adhesion by antigen THY1	sig	non-sig	non-sig	non-sig
CPI-SC003905460	THY1_integrin_aMb2_complex	MHC 1	Homeostasis 1	Adhesion by antigen THY1	sig	non-sig	non-sig	non-sig
CPI-SC003905460	THY1_integrin_aMb2_complex	Macrophage	Homeostasis 1	Adhesion by antigen THY1	sig	non-sig	non-sig	non-sig
CPI-SC003905460	THY1_integrin_aMb2_complex	Monocyte	Homeostasis 1	Adhesion by antigen THY1	sig	non-sig	non-sig	non-sig
CPI-SC003905460	THY1_integrin_aMb2_complex	Proliferation	DAM1	Adhesion by antigen THY1	sig	non-sig	non-sig	non-sig
CPI-SC003905460	THY1_integrin_aMb2_complex	Proliferation	Homeostasis 1	Adhesion by antigen THY1	sig	non-sig	non-sig	non-sig
CPI-SC003905460	THY1_integrin_aMb2_complex	Proliferation	Proliferation	Adhesion by antigen THY1	sig	non-sig	non-sig	non-sig
CPI-SC003905460	THY1_integrin_aMb2_complex	Tau Microglia	Homeostasis 1	Adhesion by antigen THY1	sig	non-sig	non-sig	non-sig
CPI-SC08CB03AD8	ICAM1_integrin_aXb2_complex	Homeostasis 1	DAM1	Adhesion by ICAM	sig	non-sig	non-sig	non-sig
CPI-SC08CB03AD8	ICAM1_integrin_aXb2_complex	Homeostasis 1	Homeostasis 1	Adhesion by ICAM	sig	sig	non-sig	non-sig
CPI-SC08CB03AD8	ICAM1_integrin_aXb2_complex	Homeostasis 2	Homeostasis 1	Adhesion by ICAM	sig	non-sig	non-sig	non-sig
CPI-SC08CB03AD8	ICAM1_integrin_aXb2_complex	T cell	Homeostasis 1	Adhesion by ICAM	sig	non-sig	non-sig	non-sig
CPI-SC08CB03AD8	ICAM1_integrin_aXb2_complex	MHC 2	Homeostasis 1	Adhesion by ICAM	sig	non-sig	non-sig	non-sig
CPI-SC08CB03AD8	ICAM1_integrin_aXb2_complex	Monocyte	DAM1	Adhesion by ICAM	sig	sig	non-sig	non-sig
CPI-SC08CB03AD8	ICAM1_integrin_aXb2_complex	Monocyte	Homeostasis 1	Adhesion by ICAM	sig	sig	non-sig	non-sig
CPI-SC08CB03AD8	ICAM1_integrin_aXb2_complex	Proliferation	Homeostasis 1	Adhesion by ICAM	sig	non-sig	non-sig	non-sig
CPI-SC08CB03AD8	ICAM1_integrin_aXb2_complex	Tau Microglia	Homeostasis 1	Adhesion by ICAM	sig	non-sig	non-sig	non-sig
CPI-SC0EFDBED2D	THY1_integrin_aXb2_complex	DAM1	Homeostasis 1	Adhesion by antigen THY1	sig	non-sig	non-sig	non-sig
CPI-SC0EFDBED2D	THY1_integrin_aXb2_complex	Homeostasis 1	MHC 1	Adhesion by antigen THY1	sig	non-sig	non-sig	non-sig
CPI-SC0EFDBED2D	THY1_integrin_aXb2_complex	Homeostasis 2	Homeostasis 1	Adhesion by antigen THY1	sig	non-sig	non-sig	non-sig
CPI-SC0EFDBED2D	THY1_integrin_aXb2_complex	MHC 1	Homeostasis 1	Adhesion by antigen THY1	sig	non-sig	non-sig	non-sig
CPI-SC0EFDBED2D	THY1_integrin_aXb2_complex	Macrophage	Homeostasis 1	Adhesion by antigen THY1	sig	non-sig	non-sig	non-sig
CPI-SC0EFDBED2D	THY1_integrin_aXb2_complex	Monocyte	Homeostasis 1	Adhesion by antigen THY1	sig	non-sig	non-sig	non-sig
CPI-SC0EFDBED2D	THY1_integrin_aXb2_complex	Proliferation	DAM1	Adhesion by antigen THY1	sig	non-sig	non-sig	non-sig
CPI-SC0EFDBED2D	THY1_integrin_aXb2_complex	Proliferation	Homeostasis 1	Adhesion by antigen THY1	sig	non-sig	non-sig	non-sig
CPI-SC0EFDBED2D	THY1_integrin_aXb2_complex	Tau Microglia	Homeostasis 1	Adhesion by antigen THY1	sig	non-sig	non-sig	non-sig
CPI-SC0C2126F8E	JAM2_integrin_a4b1_complex	DAM1	Macrophage	Adhesion by JAM	sig	non-sig	non-sig	non-sig
CPI-SC0C2126F8E	JAM2_integrin_a4b1_complex	Proliferation	Macrophage	Adhesion by JAM	sig	non-sig	non-sig	non-sig
CPI-SC0C2126F8E	JAM2_integrin_a4b1_complex	Tau Microglia	Macrophage	Adhesion by JAM	sig	sig	non-sig	non-sig
CPI-SC0C81483EA	SPP1_integrin_a4b1_complex	DAM1	DAM1	Adhesion by Osteopontin	sig	non-sig	non-sig	non-sig
CPI-SC0C81483EA	SPP1_integrin_a4b1_complex	DAM1	Inflammation	Adhesion by Osteopontin	sig	non-sig	non-sig	non-sig
CPI-SC0C81483EA	SPP1_integrin_a4b1_complex	DAM1	MHC 1	Adhesion by Osteopontin	sig	non-sig	non-sig	non-sig
CPI-SC0C81483EA	SPP1_integrin_a4b1_complex	DAM1	Proliferation	Adhesion by Osteopontin	sig	non-sig	non-sig	non-sig
CPI-SC0C81483EA	SPP1_integrin_a4b1_complex	Homeostasis 1	Homeostasis 1	Adhesion by Osteopontin	sig	sig	non-sig	non-sig
CPI-SC0C81483EA	SPP1_integrin_a4b1_complex	Homeostasis 2	Homeostasis 1	Adhesion by Osteopontin	sig	sig	non-sig	non-sig
CPI-SC0C81483EA	SPP1_integrin_a4b1_complex	Inflammation	Homeostasis 1	Adhesion by Osteopontin	sig	sig	non-sig	non-sig
CPI-SC0C81483EA	SPP1_integrin_a4b1_complex	MHC 1	Homeostasis 1	Adhesion by Osteopontin	sig	sig	non-sig	non-sig
CPI-SC0C81483EA	SPP1_integrin_a4b1_complex	MHC 2	Homeostasis 1	Adhesion by Osteopontin	sig	sig	non-sig	non-sig
CPI-SC0C81483EA	SPP1_integrin_a4b1_complex	Proliferation	DAM1	Adhesion by Osteopontin	sig	non-sig	non-sig	non-sig
CPI-SC0C81483EA	SPP1_integrin_a4b1_complex	Proliferation	Homeostasis 1	Adhesion by Osteopontin	sig	non-sig	non-sig	non-sig
CPI-SC0C81483EA	SPP1_integrin_a4b1_complex	Proliferation	Inflammation	Adhesion by Osteopontin	sig	non-sig	non-sig	non-sig
CPI-SC0C81483EA	SPP1_integrin_a4b1_complex	Proliferation	MHC 1	Adhesion by Osteopontin	sig	non-sig	non-sig	non-sig
CPI-SC0C81483EA	SPP1_integrin_a4b1_complex	Proliferation	MHC 2	Adhesion by Osteopontin	sig	non-sig	non-sig	non-sig
CPI-SC0C81483EA	SPP1_integrin_a4b1_complex	Proliferation	Proliferation	Adhesion by Osteopontin	sig	non-sig	non-sig	non-sig
CPI-SC00B50273B	TNC_integrin_a4b1_complex	Homeostasis 1	T cell	Adhesion by tenascin	sig	sig	non-sig	non-sig
CPI-SC00B50273B	TNC_integrin_a4b1_complex	Homeostasis 1	Monocyte	Adhesion by tenascin	sig	sig	non-sig	non-sig
CPI-SC00B50273B	TNC_integrin_a4b1_complex	Homeostasis 2	T cell	Adhesion by tenascin	sig	non-sig	non-sig	non-sig
CPI-SC00B50273B	TNC_integrin_a4b1_complex	Homeostasis 2	Monocyte	Adhesion by tenascin	sig	non-sig	non-sig	non-sig
CPI-SC00B50273B	TNC_integrin_a4b1_complex	Monocyte	T cell	Adhesion by tenascin	sig	non-sig	non-sig	non-sig
CPI-SC00B50273B	TNC_integrin_a4b1_complex	Monocyte	Monocyte	Adhesion by tenascin	sig	non-sig	non-sig	non-sig
CPI-SC00B50273B	TNC_integrin_a4b1_complex	Proliferation	T cell	Adhesion by tenascin	sig	sig	non-sig	non-sig
CPI-SC00B50273B	TNC_integrin_a4b1_complex	Proliferation	Monocyte	Adhesion by tenascin	sig	sig	non-sig	non-sig
CPI-SC0E029AB31	PLAUR_integrin_a4b1_complex	MHC 1	Homeostasis 1	Signaling by Plasminogen Activator	sig	sig	non-sig	non-sig
CPI-SC0E029AB31	PLAUR_integrin_a4b1_complex	MHC 1	MHC 2	Signaling by Plasminogen Activator	sig	non-sig	non-sig	non-sig
CPI-SC0E029AB31	PLAUR_integrin_a4b1_complex	Monocyte	Homeostasis 1	Signaling by Plasminogen Activator	sig	sig	non-sig	non-sig
CPI-SC08F923F07	FN1_integrin_aVb1_complex	DAM1	MHC 1	Adhesion by Fibronectin	sig	sig	non-sig	non-sig
CPI-SC08F923F07	FN1_integrin_aVb1_complex	Homeostasis 1	MHC 1	Adhesion by Fibronectin	sig	sig	non-sig	non-sig
CPI-SC08F923F07	FN1_integrin_aVb1_complex	Inflammation	MHC 1	Adhesion by Fibronectin	sig	sig	non-sig	non-sig
CPI-SC08F923F07	FN1_integrin_aVb1_complex	Inflammation	MHC 2	Adhesion by Fibronectin	sig	non-sig	non-sig	non-sig
CPI-SC08F923F07	FN1_integrin_aVb1_complex	Inflammation	Proliferation	Adhesion by Fibronectin	sig	sig	non-sig	non-sig
CPI-SC08F923F07	FN1_integrin_aVb1_complex	T cell	MHC 1	Adhesion by Fibronectin	sig	non-sig	non-sig	non-sig
CPI-SC08F923F07	FN1_integrin_aVb1_complex	MHC 1	MHC 1	Adhesion by Fibronectin	sig	sig	non-sig	non-sig
CPI-SC08F923F07	FN1_integrin_aVb1_complex	MHC 1	MHC 2	Adhesion by Fibronectin	sig	non-sig	non-sig	non-sig
CPI-SC08F923F07	FN1_integrin_aVb1_complex	MHC 1	Proliferation	Adhesion by Fibronectin	sig	sig	non-sig	non-sig
CPI-SC08F923F07	FN1_integrin_aVb1_complex	Macrophage	MHC 1	Adhesion by Fibronectin	sig	non-sig	non-sig	non-sig
CPI-SC08F923F07	FN1_integrin_aVb1_complex	Proliferation	MHC 1	Adhesion by Fibronectin	sig	sig	non-sig	non-sig
CPI-SC08F923F07	FN1_integrin_aVb1_complex	Tau Microglia	MHC 1	Adhesion by Fibronectin	sig	non-sig	non-sig	non-sig
CPI-SC01D9AD677	L1CAM_integrin_aVb1_complex	MHC 1	MHC 1	Adhesion by L1CAM	sig	sig	non-sig	non-sig
CPI-SC01D9AD677	L1CAM_integrin_aVb1_complex	MHC 1	MHC 2	Adhesion by L1CAM	sig	non-sig	non-sig	non-sig
CPI-SC01D9AD677	L1CAM_integrin_aVb1_complex	MHC 1	Proliferation	Adhesion by L1CAM	sig	sig	non-sig	non-sig
CPI-SC01D9AD677	L1CAM_integrin_aVb1_complex	MHC 2	MHC 1	Adhesion by L1CAM	sig	non-sig	non-sig	non-sig
CPI-SC01D9AD677	L1CAM_integrin_aVb1_complex	Proliferation	MHC 1	Adhesion by L1CAM	sig	sig	non-sig	non-sig
CPI-SC09B45FB39	FN1_integrin_aVb5_complex	DAM1	Inflammation	Adhesion by Fibronectin	sig	non-sig	non-sig	non-sig
CPI-SC09B45FB39	FN1_integrin_aVb5_complex	Homeostasis 1	Inflammation	Adhesion by Fibronectin	sig	non-sig	non-sig	non-sig
CPI-SC09B45FB39	FN1_integrin_aVb5_complex	Inflammation	Inflammation	Adhesion by Fibronectin	sig	non-sig	non-sig	non-sig
CPI-SC09B45FB39	FN1_integrin_aVb5_complex	T cell	Inflammation	Adhesion by Fibronectin	sig	non-sig	non-sig	non-sig
CPI-SC09B45FB39	FN1_integrin_aVb5_complex	MHC 1	Inflammation	Adhesion by Fibronectin	sig	non-sig	non-sig	non-sig
CPI-SC09B45FB39	FN1_integrin_aVb5_complex	Macrophage	Inflammation	Adhesion by Fibronectin	sig	non-sig	non-sig	non-sig
CPI-SC09B45FB39	FN1_integrin_aVb5_complex	Monocyte	Inflammation	Adhesion by Fibronectin	sig	non-sig	non-sig	non-sig
CPI-SC09B45FB39	FN1_integrin_aVb5_complex	Proliferation	Inflammation	Adhesion by Fibronectin	sig	non-sig	non-sig	non-sig
CPI-SC09B45FB39	FN1_integrin_aVb5_complex	Tau Microglia	Inflammation	Adhesion by Fibronectin	sig	non-sig	non-sig	non-sig
CPI-SS0E9A581F8	ICAM1_ITGAL	Homeostasis 2	DAM1	Adhesion by ICAM	sig	non-sig	non-sig	non-sig
CPI-SS0E9A581F8	ICAM1_ITGAL	Monocyte	Homeostasis 1	Adhesion by ICAM	sig	non-sig	non-sig	non-sig
CPI-SS0E9A581F8	ICAM1_ITGAL	Proliferation	DAM1	Adhesion by ICAM	sig	non-sig	non-sig	non-sig
CPI-SS0E9A581F8	ICAM1_ITGAL	Tau Microglia	DAM1	Adhesion by ICAM	sig	sig	non-sig	non-sig
CPI-SC00035437A	ICAM1_integrin_aLb2_complex	Homeostasis 2	DAM1	Adhesion by ICAM	sig	non-sig	non-sig	non-sig
CPI-SC00035437A	ICAM1_integrin_aLb2_complex	Monocyte	Homeostasis 1	Adhesion by ICAM	sig	non-sig	non-sig	non-sig
CPI-SC00035437A	ICAM1_integrin_aLb2_complex	Proliferation	DAM1	Adhesion by ICAM	sig	non-sig	non-sig	non-sig
CPI-SC00035437A	ICAM1_integrin_aLb2_complex	Tau Microglia	DAM1	Adhesion by ICAM	sig	sig	non-sig	non-sig
CPI-SC0943ECD6E	ICAM2_integrin_aLb2_complex	Homeostasis 2	T cell	Adhesion by ICAM	sig	sig	non-sig	non-sig
CPI-SC0943ECD6E	ICAM2_integrin_aLb2_complex	Homeostasis 2	Monocyte	Adhesion by ICAM	sig	sig	non-sig	non-sig
CPI-SC0943ECD6E	ICAM2_integrin_aLb2_complex	MHC 2	DAM1	Adhesion by ICAM	sig	non-sig	non-sig	non-sig
CPI-SC0943ECD6E	ICAM2_integrin_aLb2_complex	Monocyte	Homeostasis 1	Adhesion by ICAM	sig	sig	non-sig	non-sig
CPI-SC0943ECD6E	ICAM2_integrin_aLb2_complex	Monocyte	Tau Microglia	Adhesion by ICAM	sig	sig	non-sig	non-sig
CPI-SC0EB9B5460	L1CAM_integrin_a9b1_complex	MHC 1	MHC 1	Adhesion by L1CAM	sig	sig	non-sig	non-sig
CPI-SC0EB9B5460	L1CAM_integrin_a9b1_complex	MHC 1	MHC 2	Adhesion by L1CAM	sig	non-sig	non-sig	non-sig
CPI-SC0EB9B5460	L1CAM_integrin_a9b1_complex	MHC 1	Proliferation	Adhesion by L1CAM	sig	sig	non-sig	non-sig
CPI-SC0EB9B5460	L1CAM_integrin_a9b1_complex	MHC 2	MHC 1	Adhesion by L1CAM	sig	non-sig	non-sig	non-sig
CPI-SC0EB9B5460	L1CAM_integrin_a9b1_complex	Proliferation	MHC 1	Adhesion by L1CAM	sig	sig	non-sig	non-sig
CPI-SC069FF84F5	SPP1_integrin_a9b1_complex	DAM1	DAM1	Adhesion by Osteopontin	sig	non-sig	non-sig	non-sig
CPI-SC069FF84F5	SPP1_integrin_a9b1_complex	DAM1	Homeostasis 1	Adhesion by Osteopontin	sig	non-sig	non-sig	non-sig
CPI-SC069FF84F5	SPP1_integrin_a9b1_complex	DAM1	Homeostasis 2	Adhesion by Osteopontin	sig	non-sig	non-sig	non-sig
CPI-SC069FF84F5	SPP1_integrin_a9b1_complex	DAM1	Inflammation	Adhesion by Osteopontin	sig	non-sig	non-sig	non-sig
CPI-SC069FF84F5	SPP1_integrin_a9b1_complex	DAM1	MHC 1	Adhesion by Osteopontin	sig	non-sig	non-sig	non-sig
CPI-SC069FF84F5	SPP1_integrin_a9b1_complex	DAM1	MHC 2	Adhesion by Osteopontin	sig	non-sig	non-sig	non-sig
CPI-SC069FF84F5	SPP1_integrin_a9b1_complex	DAM1	Macrophage	Adhesion by Osteopontin	sig	non-sig	non-sig	non-sig
CPI-SC069FF84F5	SPP1_integrin_a9b1_complex	DAM1	Proliferation	Adhesion by Osteopontin	sig	non-sig	non-sig	non-sig
CPI-SC069FF84F5	SPP1_integrin_a9b1_complex	Homeostasis 1	T cell	Adhesion by Osteopontin	sig	non-sig	non-sig	non-sig
CPI-SC069FF84F5	SPP1_integrin_a9b1_complex	Homeostasis 1	Monocyte	Adhesion by Osteopontin	sig	non-sig	non-sig	non-sig
CPI-SC069FF84F5	SPP1_integrin_a9b1_complex	Proliferation	DAM1	Adhesion by Osteopontin	sig	non-sig	non-sig	non-sig
CPI-SC069FF84F5	SPP1_integrin_a9b1_complex	Proliferation	Homeostasis 1	Adhesion by Osteopontin	sig	non-sig	non-sig	non-sig
CPI-SC069FF84F5	SPP1_integrin_a9b1_complex	Proliferation	Homeostasis 2	Adhesion by Osteopontin	sig	non-sig	non-sig	non-sig
CPI-SC069FF84F5	SPP1_integrin_a9b1_complex	Proliferation	Inflammation	Adhesion by Osteopontin	sig	non-sig	non-sig	non-sig
CPI-SC069FF84F5	SPP1_integrin_a9b1_complex	Proliferation	T cell	Adhesion by Osteopontin	sig	non-sig	non-sig	non-sig
CPI-SC069FF84F5	SPP1_integrin_a9b1_complex	Proliferation	MHC 1	Adhesion by Osteopontin	sig	non-sig	non-sig	non-sig
CPI-SC069FF84F5	SPP1_integrin_a9b1_complex	Proliferation	MHC 2	Adhesion by Osteopontin	sig	non-sig	non-sig	non-sig
CPI-SC069FF84F5	SPP1_integrin_a9b1_complex	Proliferation	Macrophage	Adhesion by Osteopontin	sig	non-sig	non-sig	non-sig
CPI-SC069FF84F5	SPP1_integrin_a9b1_complex	Proliferation	Monocyte	Adhesion by Osteopontin	sig	non-sig	non-sig	non-sig
CPI-SC069FF84F5	SPP1_integrin_a9b1_complex	Proliferation	Tau Microglia	Adhesion by Osteopontin	sig	non-sig	non-sig	non-sig
CPI-SC0B5F57CE1	TNC_integrin_a9b1_complex	DAM1	MHC 1	Adhesion by tenascin	sig	non-sig	non-sig	non-sig
CPI-SC0B5F57CE1	TNC_integrin_a9b1_complex	Homeostasis 1	MHC 1	Adhesion by tenascin	sig	sig	non-sig	non-sig
CPI-SC0B5F57CE1	TNC_integrin_a9b1_complex	Homeostasis 1	MHC 2	Adhesion by tenascin	sig	non-sig	non-sig	non-sig
CPI-SC0B5F57CE1	TNC_integrin_a9b1_complex	Homeostasis 1	Proliferation	Adhesion by tenascin	sig	sig	non-sig	non-sig
CPI-SC0B5F57CE1	TNC_integrin_a9b1_complex	Homeostasis 2	MHC 1	Adhesion by tenascin	sig	non-sig	non-sig	non-sig
CPI-SC0B5F57CE1	TNC_integrin_a9b1_complex	Homeostasis 2	MHC 2	Adhesion by tenascin	sig	non-sig	non-sig	non-sig
CPI-SC0B5F57CE1	TNC_integrin_a9b1_complex	Homeostasis 2	Proliferation	Adhesion by tenascin	sig	non-sig	non-sig	non-sig
CPI-SC0B5F57CE1	TNC_integrin_a9b1_complex	Inflammation	Homeostasis 2	Adhesion by tenascin	sig	non-sig	non-sig	non-sig
CPI-SC0B5F57CE1	TNC_integrin_a9b1_complex	Inflammation	MHC 1	Adhesion by tenascin	sig	non-sig	non-sig	non-sig
CPI-SC0B5F57CE1	TNC_integrin_a9b1_complex	Inflammation	MHC 2	Adhesion by tenascin	sig	non-sig	non-sig	non-sig
CPI-SC0B5F57CE1	TNC_integrin_a9b1_complex	Inflammation	Proliferation	Adhesion by tenascin	sig	non-sig	non-sig	non-sig
CPI-SC0B5F57CE1	TNC_integrin_a9b1_complex	T cell	MHC 1	Adhesion by tenascin	sig	non-sig	non-sig	non-sig
CPI-SC0B5F57CE1	TNC_integrin_a9b1_complex	MHC 2	MHC 1	Adhesion by tenascin	sig	sig	non-sig	non-sig
CPI-SC0B5F57CE1	TNC_integrin_a9b1_complex	Macrophage	MHC 1	Adhesion by tenascin	sig	non-sig	non-sig	non-sig
CPI-SC0B5F57CE1	TNC_integrin_a9b1_complex	Monocyte	MHC 1	Adhesion by tenascin	sig	non-sig	non-sig	non-sig
CPI-SC0B5F57CE1	TNC_integrin_a9b1_complex	Monocyte	MHC 2	Adhesion by tenascin	sig	non-sig	non-sig	non-sig
CPI-SC0B5F57CE1	TNC_integrin_a9b1_complex	Monocyte	Proliferation	Adhesion by tenascin	sig	non-sig	non-sig	non-sig
CPI-SC0B5F57CE1	TNC_integrin_a9b1_complex	Proliferation	MHC 1	Adhesion by tenascin	sig	sig	non-sig	non-sig
CPI-SC0B5F57CE1	TNC_integrin_a9b1_complex	Proliferation	MHC 2	Adhesion by tenascin	sig	non-sig	non-sig	non-sig
CPI-SC0B5F57CE1	TNC_integrin_a9b1_complex	Proliferation	Proliferation	Adhesion by tenascin	sig	sig	non-sig	non-sig
CPI-SC0B5F57CE1	TNC_integrin_a9b1_complex	Tau Microglia	MHC 1	Adhesion by tenascin	sig	non-sig	non-sig	non-sig
CPI-SS0C93E48D7	THBS1_CD36	Monocyte	MHC 2	Signaling by Thrombospondin precursor	sig	non-sig	non-sig	non-sig
CPI-SS026C7F8A2	ENTPD1_ADORA1	Homeostasis 1	Homeostasis 1	Signaling by Ectonucleoside	sig	non-sig	non-sig	non-sig
CPI-SS026C7F8A2	ENTPD1_ADORA1	Homeostasis 1	Proliferation	Signaling by Ectonucleoside	sig	non-sig	non-sig	non-sig
CPI-SS026C7F8A2	ENTPD1_ADORA1	Inflammation	DAM1	Signaling by Ectonucleoside	sig	non-sig	non-sig	non-sig
CPI-SS026C7F8A2	ENTPD1_ADORA1	Inflammation	Homeostasis 1	Signaling by Ectonucleoside	sig	non-sig	non-sig	non-sig
CPI-SS026C7F8A2	ENTPD1_ADORA1	Inflammation	Homeostasis 2	Signaling by Ectonucleoside	sig	non-sig	non-sig	non-sig
CPI-SS026C7F8A2	ENTPD1_ADORA1	Inflammation	Inflammation	Signaling by Ectonucleoside	sig	non-sig	non-sig	non-sig
CPI-SS026C7F8A2	ENTPD1_ADORA1	Inflammation	MHC 1	Signaling by Ectonucleoside	sig	non-sig	non-sig	non-sig
CPI-SS026C7F8A2	ENTPD1_ADORA1	Inflammation	MHC 2	Signaling by Ectonucleoside	sig	non-sig	non-sig	non-sig
CPI-SS026C7F8A2	ENTPD1_ADORA1	Inflammation	Macrophage	Signaling by Ectonucleoside	sig	non-sig	non-sig	non-sig
CPI-SS026C7F8A2	ENTPD1_ADORA1	Inflammation	Monocyte	Signaling by Ectonucleoside	sig	non-sig	non-sig	non-sig
CPI-SS026C7F8A2	ENTPD1_ADORA1	Inflammation	Proliferation	Signaling by Ectonucleoside	sig	non-sig	non-sig	non-sig
CPI-SS026C7F8A2	ENTPD1_ADORA1	Inflammation	Tau Microglia	Signaling by Ectonucleoside	sig	non-sig	non-sig	non-sig
CPI-SS08C884E97	ENTPD1_ADORA2B	Homeostasis 1	Monocyte	Signaling by Ectonucleoside	sig	sig	non-sig	non-sig
CPI-SS08C884E97	ENTPD1_ADORA2B	Inflammation	Monocyte	Signaling by Ectonucleoside	sig	non-sig	non-sig	non-sig
CPI-SS0276D5C7E	ENTPD1_ADORA3	DAM1	MHC 2	Signaling by Ectonucleoside	sig	non-sig	non-sig	non-sig
CPI-SS0276D5C7E	ENTPD1_ADORA3	Homeostasis 1	Homeostasis 1	Signaling by Ectonucleoside	sig	non-sig	non-sig	non-sig
CPI-SS0276D5C7E	ENTPD1_ADORA3	Homeostasis 1	Homeostasis 2	Signaling by Ectonucleoside	sig	non-sig	non-sig	non-sig
CPI-SS0276D5C7E	ENTPD1_ADORA3	Homeostasis 1	MHC 1	Signaling by Ectonucleoside	sig	non-sig	non-sig	non-sig
CPI-SS0276D5C7E	ENTPD1_ADORA3	Homeostasis 1	Proliferation	Signaling by Ectonucleoside	sig	non-sig	non-sig	non-sig
CPI-SS0276D5C7E	ENTPD1_ADORA3	Homeostasis 2	MHC 2	Signaling by Ectonucleoside	sig	non-sig	non-sig	non-sig
CPI-SS0276D5C7E	ENTPD1_ADORA3	Inflammation	DAM1	Signaling by Ectonucleoside	sig	non-sig	non-sig	non-sig
CPI-SS0276D5C7E	ENTPD1_ADORA3	Inflammation	Homeostasis 1	Signaling by Ectonucleoside	sig	non-sig	non-sig	non-sig
CPI-SS0276D5C7E	ENTPD1_ADORA3	Inflammation	Homeostasis 2	Signaling by Ectonucleoside	sig	non-sig	non-sig	non-sig
CPI-SS0276D5C7E	ENTPD1_ADORA3	Inflammation	MHC 1	Signaling by Ectonucleoside	sig	non-sig	non-sig	non-sig
CPI-SS0276D5C7E	ENTPD1_ADORA3	Inflammation	MHC 2	Signaling by Ectonucleoside	sig	non-sig	non-sig	non-sig
CPI-SS0276D5C7E	ENTPD1_ADORA3	Inflammation	Macrophage	Signaling by Ectonucleoside	sig	non-sig	non-sig	non-sig
CPI-SS0276D5C7E	ENTPD1_ADORA3	Inflammation	Proliferation	Signaling by Ectonucleoside	sig	non-sig	non-sig	non-sig
CPI-SS0276D5C7E	ENTPD1_ADORA3	MHC 1	Homeostasis 1	Signaling by Ectonucleoside	sig	non-sig	non-sig	non-sig
CPI-SS0276D5C7E	ENTPD1_ADORA3	Proliferation	Homeostasis 1	Signaling by Ectonucleoside	sig	non-sig	non-sig	non-sig
CPI-SS0276D5C7E	ENTPD1_ADORA3	Proliferation	Homeostasis 2	Signaling by Ectonucleoside	sig	non-sig	non-sig	non-sig
CPI-SS0276D5C7E	ENTPD1_ADORA3	Tau Microglia	MHC 2	Signaling by Ectonucleoside	sig	non-sig	non-sig	non-sig
CPI-SS08968FFAE	LRRTM4_PTPRS	MHC 1	Homeostasis 1	Signaling by Leucine-Rich Repeat Transmembrane Neuronal Protein	sig	non-sig	non-sig	non-sig
CPI-SS08968FFAE	LRRTM4_PTPRS	Proliferation	MHC 1	Signaling by Leucine-Rich Repeat Transmembrane Neuronal Protein	sig	non-sig	non-sig	non-sig
CPI-SS080C81D37	APP_CD74	DAM1	Homeostasis 1	Signaling by Amyloid-beta precursor protein	sig	non-sig	non-sig	non-sig
CPI-SS080C81D37	APP_CD74	DAM1	MHC 1	Signaling by Amyloid-beta precursor protein	sig	non-sig	non-sig	non-sig
CPI-SS080C81D37	APP_CD74	Homeostasis 2	Homeostasis 1	Signaling by Amyloid-beta precursor protein	sig	non-sig	non-sig	non-sig
CPI-SS080C81D37	APP_CD74	Homeostasis 2	MHC 1	Signaling by Amyloid-beta precursor protein	sig	non-sig	non-sig	non-sig
CPI-SS080C81D37	APP_CD74	Inflammation	Homeostasis 1	Signaling by Amyloid-beta precursor protein	sig	non-sig	non-sig	non-sig
CPI-SS080C81D37	APP_CD74	Inflammation	MHC 1	Signaling by Amyloid-beta precursor protein	sig	non-sig	non-sig	non-sig
CPI-SS080C81D37	APP_CD74	MHC 1	Homeostasis 1	Signaling by Amyloid-beta precursor protein	sig	non-sig	non-sig	non-sig
CPI-SS080C81D37	APP_CD74	Proliferation	Homeostasis 1	Signaling by Amyloid-beta precursor protein	sig	non-sig	non-sig	non-sig
CPI-SS080C81D37	APP_CD74	Proliferation	MHC 1	Signaling by Amyloid-beta precursor protein	sig	non-sig	non-sig	non-sig
CPI-SS080C81D37	APP_CD74	Tau Microglia	Homeostasis 1	Signaling by Amyloid-beta precursor protein	sig	non-sig	non-sig	non-sig
CPI-SS080C81D37	APP_CD74	Tau Microglia	MHC 1	Signaling by Amyloid-beta precursor protein	sig	non-sig	non-sig	non-sig
CPI-SS0CB6F5575	APP_PLXNA4	Homeostasis 1	Homeostasis 2	Signaling by Amyloid-beta precursor protein	sig	non-sig	non-sig	non-sig
CPI-SS0CB6F5575	APP_PLXNA4	Homeostasis 1	Inflammation	Signaling by Amyloid-beta precursor protein	sig	non-sig	non-sig	non-sig
CPI-SS0CB6F5575	APP_PLXNA4	MHC 1	DAM1	Signaling by Amyloid-beta precursor protein	sig	non-sig	non-sig	non-sig
CPI-SS0CB6F5575	APP_PLXNA4	MHC 1	Homeostasis 2	Signaling by Amyloid-beta precursor protein	sig	non-sig	non-sig	non-sig
CPI-SS0CB6F5575	APP_PLXNA4	MHC 1	Inflammation	Signaling by Amyloid-beta precursor protein	sig	non-sig	non-sig	non-sig
CPI-SS0CB6F5575	APP_PLXNA4	MHC 1	MHC 1	Signaling by Amyloid-beta precursor protein	sig	non-sig	non-sig	non-sig
CPI-SS0CB6F5575	APP_PLXNA4	MHC 1	MHC 2	Signaling by Amyloid-beta precursor protein	sig	non-sig	non-sig	non-sig
CPI-SS0CB6F5575	APP_PLXNA4	MHC 1	Macrophage	Signaling by Amyloid-beta precursor protein	sig	non-sig	non-sig	non-sig
CPI-SS0CB6F5575	APP_PLXNA4	MHC 1	Monocyte	Signaling by Amyloid-beta precursor protein	sig	non-sig	non-sig	non-sig
CPI-SS0CB6F5575	APP_PLXNA4	MHC 1	Proliferation	Signaling by Amyloid-beta precursor protein	sig	non-sig	non-sig	non-sig
CPI-SS0CB6F5575	APP_PLXNA4	MHC 1	Tau Microglia	Signaling by Amyloid-beta precursor protein	sig	non-sig	non-sig	non-sig
CPI-SS0DF830287	APLP2_PLXNA4	Homeostasis 1	Homeostasis 2	Signaling by Amyloid-like protein	sig	non-sig	non-sig	non-sig
CPI-SS0DF830287	APLP2_PLXNA4	Homeostasis 1	Inflammation	Signaling by Amyloid-like protein	sig	non-sig	non-sig	non-sig
CPI-SS0DF830287	APLP2_PLXNA4	Homeostasis 1	Monocyte	Signaling by Amyloid-like protein	sig	non-sig	non-sig	non-sig
CPI-SS0DF830287	APLP2_PLXNA4	MHC 1	DAM1	Signaling by Amyloid-like protein	sig	non-sig	non-sig	non-sig
CPI-SS0DF830287	APLP2_PLXNA4	MHC 1	Homeostasis 1	Signaling by Amyloid-like protein	sig	non-sig	non-sig	non-sig
CPI-SS0DF830287	APLP2_PLXNA4	MHC 1	Homeostasis 2	Signaling by Amyloid-like protein	sig	non-sig	non-sig	non-sig
CPI-SS0DF830287	APLP2_PLXNA4	MHC 1	Inflammation	Signaling by Amyloid-like protein	sig	non-sig	non-sig	non-sig
CPI-SS0DF830287	APLP2_PLXNA4	MHC 1	T cell	Signaling by Amyloid-like protein	sig	non-sig	non-sig	non-sig
CPI-SS0DF830287	APLP2_PLXNA4	MHC 1	MHC 1	Signaling by Amyloid-like protein	sig	non-sig	non-sig	non-sig
CPI-SS0DF830287	APLP2_PLXNA4	MHC 1	MHC 2	Signaling by Amyloid-like protein	sig	non-sig	non-sig	non-sig
CPI-SS0DF830287	APLP2_PLXNA4	MHC 1	Macrophage	Signaling by Amyloid-like protein	sig	non-sig	non-sig	non-sig
CPI-SS0DF830287	APLP2_PLXNA4	MHC 1	Monocyte	Signaling by Amyloid-like protein	sig	non-sig	non-sig	non-sig
CPI-SS0DF830287	APLP2_PLXNA4	MHC 1	Proliferation	Signaling by Amyloid-like protein	sig	non-sig	non-sig	non-sig
CPI-SS0DF830287	APLP2_PLXNA4	MHC 1	Tau Microglia	Signaling by Amyloid-like protein	sig	non-sig	non-sig	non-sig
CPI-SS0DF830287	APLP2_PLXNA4	MHC 2	Homeostasis 2	Signaling by Amyloid-like protein	sig	non-sig	non-sig	non-sig
CPI-SS0DF830287	APLP2_PLXNA4	Proliferation	Homeostasis 2	Signaling by Amyloid-like protein	sig	sig	non-sig	non-sig
CPI-SS07ACDDCD6	APP_SORL1	Tau Microglia	DAM1	Signaling by Amyloid-beta precursor protein	sig	sig	non-sig	non-sig
CPI-SS097A84265	APP_TNFRSF21	MHC 1	DAM1	Signaling by Amyloid-beta precursor protein	sig	non-sig	non-sig	non-sig
CPI-SS097A84265	APP_TNFRSF21	MHC 1	Homeostasis 1	Signaling by Amyloid-beta precursor protein	sig	non-sig	non-sig	non-sig
CPI-SS097A84265	APP_TNFRSF21	MHC 1	Homeostasis 2	Signaling by Amyloid-beta precursor protein	sig	non-sig	non-sig	non-sig
CPI-SS097A84265	APP_TNFRSF21	MHC 1	Monocyte	Signaling by Amyloid-beta precursor protein	sig	non-sig	non-sig	non-sig
CPI-SS097A84265	APP_TNFRSF21	MHC 1	Proliferation	Signaling by Amyloid-beta precursor protein	sig	non-sig	non-sig	non-sig
CPI-SS097A84265	APP_TNFRSF21	Proliferation	Monocyte	Signaling by Amyloid-beta precursor protein	sig	non-sig	non-sig	non-sig
CPI-SC0E89A4EF0	APP_TREM2_receptor	Homeostasis 1	Inflammation	Signaling by Amyloid-beta precursor protein	sig	non-sig	non-sig	non-sig
CPI-SC0E89A4EF0	APP_TREM2_receptor	Homeostasis 1	Proliferation	Signaling by Amyloid-beta precursor protein	sig	non-sig	non-sig	non-sig
CPI-SC0E89A4EF0	APP_TREM2_receptor	MHC 1	Homeostasis 1	Signaling by Amyloid-beta precursor protein	sig	non-sig	non-sig	non-sig
CPI-SC0E89A4EF0	APP_TREM2_receptor	MHC 1	MHC 1	Signaling by Amyloid-beta precursor protein	sig	non-sig	non-sig	non-sig
CPI-SC0E89A4EF0	APP_TREM2_receptor	MHC 1	Proliferation	Signaling by Amyloid-beta precursor protein	sig	non-sig	non-sig	non-sig
CPI-SC0E89A4EF0	APP_TREM2_receptor	MHC 1	Tau Microglia	Signaling by Amyloid-beta precursor protein	sig	non-sig	non-sig	non-sig
CPI-SC0E89A4EF0	APP_TREM2_receptor	Macrophage	Proliferation	Signaling by Amyloid-beta precursor protein	sig	sig	non-sig	non-sig
CPI-SC0E89A4EF0	APP_TREM2_receptor	Monocyte	Proliferation	Signaling by Amyloid-beta precursor protein	sig	sig	non-sig	non-sig
CPI-SC0E89A4EF0	APP_TREM2_receptor	Proliferation	Homeostasis 2	Signaling by Amyloid-beta precursor protein	sig	non-sig	non-sig	non-sig
CPI-SC06C75F978	APOE_TREM2_receptor	Homeostasis 1	DAM1	Signaling by Apolipoprotein	sig	sig	non-sig	non-sig
CPI-SC06C75F978	APOE_TREM2_receptor	Homeostasis 1	Homeostasis 1	Signaling by Apolipoprotein	sig	non-sig	non-sig	non-sig
CPI-SC06C75F978	APOE_TREM2_receptor	Homeostasis 1	Homeostasis 2	Signaling by Apolipoprotein	sig	non-sig	non-sig	non-sig
CPI-SC06C75F978	APOE_TREM2_receptor	Homeostasis 1	Inflammation	Signaling by Apolipoprotein	sig	non-sig	non-sig	non-sig
CPI-SC06C75F978	APOE_TREM2_receptor	Homeostasis 1	MHC 1	Signaling by Apolipoprotein	sig	non-sig	non-sig	non-sig
CPI-SC06C75F978	APOE_TREM2_receptor	Homeostasis 1	Macrophage	Signaling by Apolipoprotein	sig	non-sig	non-sig	non-sig
CPI-SC06C75F978	APOE_TREM2_receptor	Homeostasis 1	Proliferation	Signaling by Apolipoprotein	sig	non-sig	non-sig	non-sig
CPI-SC06C75F978	APOE_TREM2_receptor	Homeostasis 1	Tau Microglia	Signaling by Apolipoprotein	sig	non-sig	non-sig	non-sig
CPI-SC06C75F978	APOE_TREM2_receptor	Homeostasis 2	Homeostasis 1	Signaling by Apolipoprotein	sig	non-sig	non-sig	non-sig
CPI-SC06C75F978	APOE_TREM2_receptor	Homeostasis 2	MHC 1	Signaling by Apolipoprotein	sig	non-sig	non-sig	non-sig
CPI-SC06C75F978	APOE_TREM2_receptor	Homeostasis 2	Proliferation	Signaling by Apolipoprotein	sig	non-sig	non-sig	non-sig
CPI-SC06C75F978	APOE_TREM2_receptor	Homeostasis 2	Tau Microglia	Signaling by Apolipoprotein	sig	non-sig	non-sig	non-sig
CPI-SC06C75F978	APOE_TREM2_receptor	Proliferation	DAM1	Signaling by Apolipoprotein	sig	non-sig	non-sig	non-sig
CPI-SC06C75F978	APOE_TREM2_receptor	Proliferation	Homeostasis 1	Signaling by Apolipoprotein	sig	non-sig	non-sig	non-sig
CPI-SC06C75F978	APOE_TREM2_receptor	Proliferation	Inflammation	Signaling by Apolipoprotein	sig	non-sig	non-sig	non-sig
CPI-SC06C75F978	APOE_TREM2_receptor	Proliferation	MHC 1	Signaling by Apolipoprotein	sig	non-sig	non-sig	non-sig
CPI-SC06C75F978	APOE_TREM2_receptor	Proliferation	Macrophage	Signaling by Apolipoprotein	sig	non-sig	non-sig	non-sig
CPI-SC06C75F978	APOE_TREM2_receptor	Proliferation	Proliferation	Signaling by Apolipoprotein	sig	non-sig	non-sig	non-sig
CPI-SC06C75F978	APOE_TREM2_receptor	Proliferation	Tau Microglia	Signaling by Apolipoprotein	sig	non-sig	non-sig	non-sig
CPI-SC046AFCFE9	CLU_TREM2_receptor	Homeostasis 1	Macrophage		sig	non-sig	non-sig	non-sig
CPI-SC046AFCFE9	CLU_TREM2_receptor	Homeostasis 1	Proliferation		sig	non-sig	non-sig	non-sig
CPI-SC046AFCFE9	CLU_TREM2_receptor	Homeostasis 2	MHC 2		sig	non-sig	non-sig	non-sig
CPI-SC046AFCFE9	CLU_TREM2_receptor	MHC 1	Homeostasis 1		sig	non-sig	non-sig	non-sig
CPI-SC046AFCFE9	CLU_TREM2_receptor	MHC 1	Homeostasis 2		sig	non-sig	non-sig	non-sig
CPI-SC046AFCFE9	CLU_TREM2_receptor	Monocyte	Proliferation		sig	non-sig	non-sig	non-sig
CPI-SC046AFCFE9	CLU_TREM2_receptor	Proliferation	Homeostasis 1		sig	non-sig	non-sig	non-sig
CPI-SC046AFCFE9	CLU_TREM2_receptor	Proliferation	MHC 1		sig	non-sig	non-sig	non-sig
CPI-CS09B8977D7	Dehydroepiandrosterone_bySTS_ESR1	DAM1	MHC 1	Signaling by Dehydroepiandrosterone	sig	non-sig	non-sig	non-sig
CPI-CS09B8977D7	Dehydroepiandrosterone_bySTS_ESR1	Homeostasis 1	MHC 1	Signaling by Dehydroepiandrosterone	sig	non-sig	non-sig	non-sig
CPI-CS09B8977D7	Dehydroepiandrosterone_bySTS_ESR1	Homeostasis 1	Proliferation	Signaling by Dehydroepiandrosterone	sig	sig	non-sig	non-sig
CPI-CS09B8977D7	Dehydroepiandrosterone_bySTS_ESR1	Monocyte	T cell	Signaling by Dehydroepiandrosterone	sig	non-sig	non-sig	non-sig
CPI-CS09B8977D7	Dehydroepiandrosterone_bySTS_ESR1	Monocyte	Monocyte	Signaling by Dehydroepiandrosterone	sig	non-sig	non-sig	non-sig
CPI-CS09B8977D7	Dehydroepiandrosterone_bySTS_ESR1	Proliferation	T cell	Signaling by Dehydroepiandrosterone	sig	non-sig	non-sig	non-sig
CPI-CS09B8977D7	Dehydroepiandrosterone_bySTS_ESR1	Proliferation	Monocyte	Signaling by Dehydroepiandrosterone	sig	non-sig	non-sig	non-sig
CPI-CS007D418BE	2arachidonoylglycerol_byDAGLB_CNR1	Homeostasis 1	DAM1	Signaling by Arachidonoylglycerol	sig	non-sig	non-sig	non-sig
CPI-CS007D418BE	2arachidonoylglycerol_byDAGLB_CNR1	Homeostasis 1	Homeostasis 1	Signaling by Arachidonoylglycerol	sig	non-sig	non-sig	non-sig
CPI-CS007D418BE	2arachidonoylglycerol_byDAGLB_CNR1	Homeostasis 1	MHC 1	Signaling by Arachidonoylglycerol	sig	non-sig	non-sig	non-sig
CPI-CS007D418BE	2arachidonoylglycerol_byDAGLB_CNR1	Homeostasis 1	Macrophage	Signaling by Arachidonoylglycerol	sig	non-sig	non-sig	non-sig
CPI-CS007D418BE	2arachidonoylglycerol_byDAGLB_CNR1	Homeostasis 1	Monocyte	Signaling by Arachidonoylglycerol	sig	non-sig	non-sig	non-sig
CPI-CS007D418BE	2arachidonoylglycerol_byDAGLB_CNR1	Homeostasis 1	Proliferation	Signaling by Arachidonoylglycerol	sig	non-sig	non-sig	non-sig
CPI-CS007D418BE	2arachidonoylglycerol_byDAGLB_CNR1	Homeostasis 2	DAM1	Signaling by Arachidonoylglycerol	sig	non-sig	non-sig	non-sig
CPI-CS007D418BE	2arachidonoylglycerol_byDAGLB_CNR1	Homeostasis 2	Homeostasis 2	Signaling by Arachidonoylglycerol	sig	non-sig	non-sig	non-sig
CPI-CS007D418BE	2arachidonoylglycerol_byDAGLB_CNR1	Homeostasis 2	MHC 1	Signaling by Arachidonoylglycerol	sig	non-sig	non-sig	non-sig
CPI-CS007D418BE	2arachidonoylglycerol_byDAGLB_CNR1	Homeostasis 2	MHC 2	Signaling by Arachidonoylglycerol	sig	non-sig	non-sig	non-sig
CPI-CS007D418BE	2arachidonoylglycerol_byDAGLB_CNR1	Homeostasis 2	Macrophage	Signaling by Arachidonoylglycerol	sig	sig	non-sig	non-sig
CPI-CS007D418BE	2arachidonoylglycerol_byDAGLB_CNR1	Inflammation	DAM1	Signaling by Arachidonoylglycerol	sig	non-sig	non-sig	non-sig
CPI-CS007D418BE	2arachidonoylglycerol_byDAGLB_CNR1	Inflammation	Homeostasis 1	Signaling by Arachidonoylglycerol	sig	non-sig	non-sig	non-sig
CPI-CS007D418BE	2arachidonoylglycerol_byDAGLB_CNR1	Inflammation	Homeostasis 2	Signaling by Arachidonoylglycerol	sig	non-sig	non-sig	non-sig
CPI-CS007D418BE	2arachidonoylglycerol_byDAGLB_CNR1	Inflammation	MHC 1	Signaling by Arachidonoylglycerol	sig	non-sig	non-sig	non-sig
CPI-CS007D418BE	2arachidonoylglycerol_byDAGLB_CNR1	Inflammation	MHC 2	Signaling by Arachidonoylglycerol	sig	non-sig	non-sig	non-sig
CPI-CS007D418BE	2arachidonoylglycerol_byDAGLB_CNR1	Inflammation	Macrophage	Signaling by Arachidonoylglycerol	sig	non-sig	non-sig	non-sig
CPI-CS007D418BE	2arachidonoylglycerol_byDAGLB_CNR1	Inflammation	Monocyte	Signaling by Arachidonoylglycerol	sig	non-sig	non-sig	non-sig
CPI-CS007D418BE	2arachidonoylglycerol_byDAGLB_CNR1	Inflammation	Proliferation	Signaling by Arachidonoylglycerol	sig	non-sig	non-sig	non-sig
CPI-CS007D418BE	2arachidonoylglycerol_byDAGLB_CNR1	MHC 1	MHC 2	Signaling by Arachidonoylglycerol	sig	non-sig	non-sig	non-sig
CPI-CS007D418BE	2arachidonoylglycerol_byDAGLB_CNR1	MHC 1	Macrophage	Signaling by Arachidonoylglycerol	sig	sig	non-sig	non-sig
CPI-CS007D418BE	2arachidonoylglycerol_byDAGLB_CNR1	Proliferation	Homeostasis 1	Signaling by Arachidonoylglycerol	sig	non-sig	non-sig	non-sig
CPI-CS007D418BE	2arachidonoylglycerol_byDAGLB_CNR1	Tau Microglia	MHC 2	Signaling by Arachidonoylglycerol	sig	sig	non-sig	non-sig
CPI-SS02A53F29E	LRPAP1_SORT1	DAM1	Homeostasis 1		sig	non-sig	non-sig	non-sig
CPI-SS02A53F29E	LRPAP1_SORT1	DAM1	Homeostasis 2		sig	non-sig	non-sig	non-sig
CPI-SS02A53F29E	LRPAP1_SORT1	DAM1	Proliferation		sig	non-sig	non-sig	non-sig
CPI-SS02A53F29E	LRPAP1_SORT1	Homeostasis 1	Homeostasis 1		sig	non-sig	non-sig	non-sig
CPI-SS02A53F29E	LRPAP1_SORT1	Homeostasis 1	Homeostasis 2		sig	non-sig	non-sig	non-sig
CPI-SS02A53F29E	LRPAP1_SORT1	Homeostasis 1	Proliferation		sig	sig	non-sig	non-sig
CPI-SS02A53F29E	LRPAP1_SORT1	Homeostasis 2	Proliferation		sig	non-sig	non-sig	non-sig
CPI-SS02A53F29E	LRPAP1_SORT1	Inflammation	Proliferation		sig	non-sig	non-sig	non-sig
CPI-SS02A53F29E	LRPAP1_SORT1	T cell	Homeostasis 1		sig	non-sig	non-sig	non-sig
CPI-SS02A53F29E	LRPAP1_SORT1	T cell	Proliferation		sig	non-sig	non-sig	non-sig
CPI-SS02A53F29E	LRPAP1_SORT1	MHC 1	Homeostasis 1		sig	non-sig	non-sig	non-sig
CPI-SS02A53F29E	LRPAP1_SORT1	MHC 1	Homeostasis 2		sig	non-sig	non-sig	non-sig
CPI-SS02A53F29E	LRPAP1_SORT1	MHC 1	Proliferation		sig	non-sig	non-sig	non-sig
CPI-SS02A53F29E	LRPAP1_SORT1	Macrophage	Homeostasis 1		sig	non-sig	non-sig	non-sig
CPI-SS02A53F29E	LRPAP1_SORT1	Macrophage	Proliferation		sig	non-sig	non-sig	non-sig
CPI-SS02A53F29E	LRPAP1_SORT1	Monocyte	Homeostasis 1		sig	non-sig	non-sig	non-sig
CPI-SS02A53F29E	LRPAP1_SORT1	Monocyte	Homeostasis 2		sig	non-sig	non-sig	non-sig
CPI-SS02A53F29E	LRPAP1_SORT1	Monocyte	Proliferation		sig	sig	non-sig	non-sig
CPI-SS02A53F29E	LRPAP1_SORT1	Proliferation	Homeostasis 1		sig	non-sig	non-sig	non-sig
CPI-SS02A53F29E	LRPAP1_SORT1	Proliferation	Homeostasis 2		sig	non-sig	non-sig	non-sig
CPI-SS02A53F29E	LRPAP1_SORT1	Proliferation	Proliferation		sig	sig	non-sig	non-sig
CPI-SS02A53F29E	LRPAP1_SORT1	Tau Microglia	Homeostasis 1		sig	non-sig	non-sig	non-sig
CPI-SS02A53F29E	LRPAP1_SORT1	Tau Microglia	Homeostasis 2		sig	non-sig	non-sig	non-sig
CPI-SS02A53F29E	LRPAP1_SORT1	Tau Microglia	Proliferation		sig	non-sig	non-sig	non-sig
CPI-SC085698C59	BMP5_BMPR1A_BMPR2	Tau Microglia	Homeostasis 1	Signaling by BMP	sig	non-sig	non-sig	non-sig
CPI-SC085698C59	BMP5_BMPR1A_BMPR2	Tau Microglia	MHC 1	Signaling by BMP	sig	non-sig	non-sig	non-sig
CPI-SC00D19A858	BMP6_BMPR1A_BMPR2	T cell	Homeostasis 1	Signaling by BMP	sig	non-sig	non-sig	non-sig
CPI-SC00D19A858	BMP6_BMPR1A_BMPR2	T cell	MHC 1	Signaling by BMP	sig	non-sig	non-sig	non-sig
CPI-SC00D19A858	BMP6_BMPR1A_BMPR2	T cell	Proliferation	Signaling by BMP	sig	sig	non-sig	non-sig
CPI-SC00D19A858	BMP6_BMPR1A_BMPR2	T cell	Tau Microglia	Signaling by BMP	sig	sig	non-sig	non-sig
CPI-SC0B1EBCCC6	BMP7_BMPR1A_BMPR2	MHC 2	MHC 1	Signaling by BMP	sig	non-sig	non-sig	non-sig
CPI-SC0B1EBCCC6	BMP7_BMPR1A_BMPR2	Monocyte	MHC 1	Signaling by BMP	sig	non-sig	non-sig	non-sig
CPI-SC0B1EBCCC6	BMP7_BMPR1A_BMPR2	Monocyte	Proliferation	Signaling by BMP	sig	non-sig	non-sig	non-sig
CPI-SC0B1EBCCC6	BMP7_BMPR1A_BMPR2	Monocyte	Tau Microglia	Signaling by BMP	sig	non-sig	non-sig	non-sig
CPI-CS0569B9B91	BMPR1B_BMPR2_BMPR1A	DAM1	MHC 1	Signaling by BMP	sig	non-sig	non-sig	non-sig
CPI-CS0569B9B91	BMPR1B_BMPR2_BMPR1A	Homeostasis 2	Proliferation	Signaling by BMP	sig	non-sig	non-sig	non-sig
CPI-CS0569B9B91	BMPR1B_BMPR2_BMPR1A	Inflammation	DAM1	Signaling by BMP	sig	non-sig	non-sig	non-sig
CPI-CS0569B9B91	BMPR1B_BMPR2_BMPR1A	Inflammation	Homeostasis 1	Signaling by BMP	sig	non-sig	non-sig	non-sig
CPI-CS0569B9B91	BMPR1B_BMPR2_BMPR1A	Inflammation	Homeostasis 2	Signaling by BMP	sig	non-sig	non-sig	non-sig
CPI-CS0569B9B91	BMPR1B_BMPR2_BMPR1A	Inflammation	Inflammation	Signaling by BMP	sig	non-sig	non-sig	non-sig
CPI-CS0569B9B91	BMPR1B_BMPR2_BMPR1A	Inflammation	MHC 1	Signaling by BMP	sig	non-sig	non-sig	non-sig
CPI-CS0569B9B91	BMPR1B_BMPR2_BMPR1A	Inflammation	Tau Microglia	Signaling by BMP	sig	non-sig	non-sig	non-sig
CPI-CS0569B9B91	BMPR1B_BMPR2_BMPR1A	T cell	Homeostasis 1	Signaling by BMP	sig	non-sig	non-sig	non-sig
CPI-CS0569B9B91	BMPR1B_BMPR2_BMPR1A	T cell	Homeostasis 2	Signaling by BMP	sig	non-sig	non-sig	non-sig
CPI-CS0569B9B91	BMPR1B_BMPR2_BMPR1A	T cell	MHC 1	Signaling by BMP	sig	non-sig	non-sig	non-sig
CPI-CS0569B9B91	BMPR1B_BMPR2_BMPR1A	Macrophage	Homeostasis 1	Signaling by BMP	sig	non-sig	non-sig	non-sig
CPI-CS0569B9B91	BMPR1B_BMPR2_BMPR1A	Macrophage	Homeostasis 2	Signaling by BMP	sig	non-sig	non-sig	non-sig
CPI-CS0569B9B91	BMPR1B_BMPR2_BMPR1A	Macrophage	MHC 1	Signaling by BMP	sig	non-sig	non-sig	non-sig
CPI-CS0569B9B91	BMPR1B_BMPR2_BMPR1A	Monocyte	Homeostasis 1	Signaling by BMP	sig	non-sig	non-sig	non-sig
CPI-CS0569B9B91	BMPR1B_BMPR2_BMPR1A	Monocyte	Homeostasis 2	Signaling by BMP	sig	non-sig	non-sig	non-sig
CPI-CS0569B9B91	BMPR1B_BMPR2_BMPR1A	Monocyte	MHC 1	Signaling by BMP	sig	non-sig	non-sig	non-sig
CPI-CS0569B9B91	BMPR1B_BMPR2_BMPR1A	Tau Microglia	Homeostasis 1	Signaling by BMP	sig	non-sig	non-sig	non-sig
CPI-CS0569B9B91	BMPR1B_BMPR2_BMPR1A	Tau Microglia	Homeostasis 2	Signaling by BMP	sig	non-sig	non-sig	non-sig
CPI-CS0569B9B91	BMPR1B_BMPR2_BMPR1A	Tau Microglia	MHC 1	Signaling by BMP	sig	non-sig	non-sig	non-sig
CPI-SS084EA55C0	CLSTN1_NRXN1	Homeostasis 2	Homeostasis 1	Signaling by Calsyntenin	sig	non-sig	non-sig	non-sig
CPI-SS09A6C048C	CLSTN2_NRXN1	Homeostasis 2	Homeostasis 1	Signaling by Calsyntenin	sig	non-sig	non-sig	non-sig
CPI-SS09A6C048C	CLSTN2_NRXN1	Inflammation	Homeostasis 1	Signaling by Calsyntenin	sig	non-sig	non-sig	non-sig
CPI-SS0B880A155	CLSTN3_NRXN1	Homeostasis 2	Homeostasis 1	Signaling by Calsyntenin	sig	non-sig	non-sig	non-sig
CPI-SS0B880A155	CLSTN3_NRXN1	Inflammation	Homeostasis 1	Signaling by Calsyntenin	sig	non-sig	non-sig	non-sig
CPI-SS0626DF0EB	LRRTM3_NRXN1	Homeostasis 2	Homeostasis 1	Signaling by Leucine-Rich Repeat Transmembrane Neuronal Protein	sig	non-sig	non-sig	non-sig
CPI-SS0626DF0EB	LRRTM3_NRXN1	Inflammation	Homeostasis 1	Signaling by Leucine-Rich Repeat Transmembrane Neuronal Protein	sig	non-sig	non-sig	non-sig
CPI-SS03466C597	LRRTM4_NRXN1	Homeostasis 1	DAM1	Signaling by Leucine-Rich Repeat Transmembrane Neuronal Protein	sig	non-sig	non-sig	non-sig
CPI-SS03466C597	LRRTM4_NRXN1	Homeostasis 1	MHC 1	Signaling by Leucine-Rich Repeat Transmembrane Neuronal Protein	sig	non-sig	non-sig	non-sig
CPI-SS0D2DF7881	NLGN1_NRXN1	Homeostasis 1	Proliferation	Signaling by Neuroligin	sig	non-sig	non-sig	non-sig
CPI-SS0613D0B62	NLGN3_NRXN1	Inflammation	Homeostasis 1	Signaling by Neuroligin	sig	sig	non-sig	non-sig
CPI-SS0FA378947	NLGN4X_NRXN1	Homeostasis 2	Homeostasis 1	Signaling by Neuroligin	sig	sig	non-sig	non-sig
CPI-SS0FA378947	NLGN4X_NRXN1	Inflammation	Homeostasis 1	Signaling by Neuroligin	sig	sig	non-sig	non-sig
CPI-SS0CCB5F46B	NLGN4Y_NRXN1	Homeostasis 2	DAM1	Signaling by Neuroligin	sig	non-sig	non-sig	non-sig
CPI-SS0CCB5F46B	NLGN4Y_NRXN1	Homeostasis 2	T cell	Signaling by Neuroligin	sig	non-sig	non-sig	non-sig
CPI-SS0CCB5F46B	NLGN4Y_NRXN1	Homeostasis 2	Tau Microglia	Signaling by Neuroligin	sig	non-sig	non-sig	non-sig
CPI-SS0CCB5F46B	NLGN4Y_NRXN1	Inflammation	Homeostasis 2	Signaling by Neuroligin	sig	non-sig	non-sig	non-sig
CPI-SS0CCB5F46B	NLGN4Y_NRXN1	Inflammation	Inflammation	Signaling by Neuroligin	sig	non-sig	non-sig	non-sig
CPI-SS0CCB5F46B	NLGN4Y_NRXN1	Inflammation	MHC 1	Signaling by Neuroligin	sig	non-sig	non-sig	non-sig
CPI-SS0CCB5F46B	NLGN4Y_NRXN1	Inflammation	MHC 2	Signaling by Neuroligin	sig	non-sig	non-sig	non-sig
CPI-SS0CCB5F46B	NLGN4Y_NRXN1	Proliferation	Inflammation	Signaling by Neuroligin	sig	non-sig	non-sig	non-sig
CPI-SS0BF9265F0	CLSTN1_NRXN2	Homeostasis 1	Homeostasis 2	Signaling by Calsyntenin	sig	non-sig	non-sig	non-sig
CPI-SS0BF9265F0	CLSTN1_NRXN2	Homeostasis 1	Inflammation	Signaling by Calsyntenin	sig	non-sig	non-sig	non-sig
CPI-SS0BF9265F0	CLSTN1_NRXN2	Homeostasis 1	Proliferation	Signaling by Calsyntenin	sig	sig	non-sig	non-sig
CPI-SS0BF9265F0	CLSTN1_NRXN2	MHC 1	Homeostasis 1	Signaling by Calsyntenin	sig	non-sig	non-sig	non-sig
CPI-SS0BF9265F0	CLSTN1_NRXN2	MHC 1	Monocyte	Signaling by Calsyntenin	sig	non-sig	non-sig	non-sig
CPI-SS0BF9265F0	CLSTN1_NRXN2	MHC 1	Proliferation	Signaling by Calsyntenin	sig	non-sig	non-sig	non-sig
CPI-SS0BF9265F0	CLSTN1_NRXN2	Proliferation	DAM1	Signaling by Calsyntenin	sig	non-sig	non-sig	non-sig
CPI-SS0BF9265F0	CLSTN1_NRXN2	Proliferation	Homeostasis 2	Signaling by Calsyntenin	sig	non-sig	non-sig	non-sig
CPI-SS0BF9265F0	CLSTN1_NRXN2	Proliferation	Inflammation	Signaling by Calsyntenin	sig	non-sig	non-sig	non-sig
CPI-SS0BF9265F0	CLSTN1_NRXN2	Proliferation	T cell	Signaling by Calsyntenin	sig	sig	non-sig	non-sig
CPI-SS0BF9265F0	CLSTN1_NRXN2	Proliferation	MHC 1	Signaling by Calsyntenin	sig	non-sig	non-sig	non-sig
CPI-SS0BF9265F0	CLSTN1_NRXN2	Proliferation	Macrophage	Signaling by Calsyntenin	sig	sig	non-sig	non-sig
CPI-SS0BF9265F0	CLSTN1_NRXN2	Proliferation	Monocyte	Signaling by Calsyntenin	sig	sig	non-sig	non-sig
CPI-SS0BF9265F0	CLSTN1_NRXN2	Proliferation	Proliferation	Signaling by Calsyntenin	sig	sig	non-sig	non-sig
CPI-SS0BF9265F0	CLSTN1_NRXN2	Proliferation	Tau Microglia	Signaling by Calsyntenin	sig	sig	non-sig	non-sig
CPI-SS0CF0A8519	NLGN1_NRXN2	Homeostasis 1	MHC 2	Signaling by Neuroligin	sig	non-sig	non-sig	non-sig
CPI-SS0CF0A8519	NLGN1_NRXN2	Homeostasis 1	Monocyte	Signaling by Neuroligin	sig	sig	non-sig	non-sig
CPI-SS0CF0A8519	NLGN1_NRXN2	Homeostasis 1	Proliferation	Signaling by Neuroligin	sig	sig	non-sig	non-sig
CPI-SS0CF0A8519	NLGN1_NRXN2	Homeostasis 1	Tau Microglia	Signaling by Neuroligin	sig	sig	non-sig	non-sig
CPI-SS07C26C799	NLGN4Y_NRXN2	Homeostasis 2	MHC 2	Signaling by Neuroligin	sig	non-sig	non-sig	non-sig
CPI-SS0A28DCA72	CXCL12_CXCR4	Inflammation	MHC 1	Signaling by Chemokines	sig	sig	non-sig	non-sig
CPI-SS0F62347D4	C1QL1_ADGRB3	Homeostasis 1	Proliferation	Signaling by Complement	sig	non-sig	non-sig	non-sig
CPI-SS0F62347D4	C1QL1_ADGRB3	Proliferation	Proliferation	Signaling by Complement	sig	non-sig	non-sig	non-sig
CPI-SS03E48EFEA	C3_C3AR1	Homeostasis 1	T cell	Signaling by Complement	sig	non-sig	non-sig	non-sig
CPI-SS03E48EFEA	C3_C3AR1	Homeostasis 2	T cell	Signaling by Complement	sig	sig	non-sig	non-sig
CPI-SS03E48EFEA	C3_C3AR1	Proliferation	DAM1	Signaling by Complement	sig	non-sig	non-sig	non-sig
CPI-SS03E48EFEA	C3_C3AR1	Proliferation	Homeostasis 1	Signaling by Complement	sig	non-sig	non-sig	non-sig
CPI-SS03E48EFEA	C3_C3AR1	Proliferation	Homeostasis 2	Signaling by Complement	sig	non-sig	non-sig	non-sig
CPI-SS03E48EFEA	C3_C3AR1	Proliferation	MHC 1	Signaling by Complement	sig	sig	non-sig	non-sig
CPI-SS03E48EFEA	C3_C3AR1	Proliferation	Macrophage	Signaling by Complement	sig	non-sig	non-sig	non-sig
CPI-SS03E48EFEA	C3_C3AR1	Proliferation	Monocyte	Signaling by Complement	sig	non-sig	non-sig	non-sig
CPI-SS03E48EFEA	C3_C3AR1	Proliferation	Proliferation	Signaling by Complement	sig	non-sig	non-sig	non-sig
CPI-SS03E48EFEA	C3_C3AR1	Tau Microglia	Proliferation	Signaling by Complement	sig	sig	non-sig	non-sig
CPI-SS00F4019EA	C3_C5AR2	Proliferation	DAM1	Signaling by Complement	sig	non-sig	non-sig	non-sig
CPI-SS00F4019EA	C3_C5AR2	Proliferation	Homeostasis 1	Signaling by Complement	sig	non-sig	non-sig	non-sig
CPI-SS00F4019EA	C3_C5AR2	Proliferation	Homeostasis 2	Signaling by Complement	sig	non-sig	non-sig	non-sig
CPI-SS00F4019EA	C3_C5AR2	Proliferation	Inflammation	Signaling by Complement	sig	non-sig	non-sig	non-sig
CPI-SS00F4019EA	C3_C5AR2	Proliferation	MHC 2	Signaling by Complement	sig	non-sig	non-sig	non-sig
CPI-SS00F4019EA	C3_C5AR2	Proliferation	Macrophage	Signaling by Complement	sig	sig	non-sig	non-sig
CPI-SS00F4019EA	C3_C5AR2	Proliferation	Monocyte	Signaling by Complement	sig	non-sig	non-sig	non-sig
CPI-SS00F4019EA	C3_C5AR2	Proliferation	Proliferation	Signaling by Complement	sig	non-sig	non-sig	non-sig
CPI-SS00F4019EA	C3_C5AR2	Proliferation	Tau Microglia	Signaling by Complement	sig	non-sig	non-sig	non-sig
CPI-SS00F4019EA	C3_C5AR2	Tau Microglia	Inflammation	Signaling by Complement	sig	sig	non-sig	non-sig
CPI-SS00581282E	C5_C5AR1	T cell	Monocyte	Signaling by Complement	sig	sig	non-sig	non-sig
CPI-SS015162AFC	IL34_CSF1R	Monocyte	Homeostasis 1	Signaling by Interleukin	sig	non-sig	non-sig	non-sig
CPI-SS015162AFC	IL34_CSF1R	Monocyte	Homeostasis 2	Signaling by Interleukin	sig	non-sig	non-sig	non-sig
CPI-SS015162AFC	IL34_CSF1R	Monocyte	MHC 2	Signaling by Interleukin	sig	non-sig	non-sig	non-sig
CPI-SS015162AFC	IL34_CSF1R	Monocyte	Tau Microglia	Signaling by Interleukin	sig	non-sig	non-sig	non-sig
CPI-CS0259A0EB4	Dehydroepiandrosterone_bySTS_PPARA	DAM1	MHC 1	Signaling by Dehydroepiandrosterone	sig	non-sig	non-sig	non-sig
CPI-CS0259A0EB4	Dehydroepiandrosterone_bySTS_PPARA	Homeostasis 1	DAM1	Signaling by Dehydroepiandrosterone	sig	non-sig	non-sig	non-sig
CPI-CS0259A0EB4	Dehydroepiandrosterone_bySTS_PPARA	Homeostasis 1	Tau Microglia	Signaling by Dehydroepiandrosterone	sig	sig	non-sig	non-sig
CPI-CS0D89E7C19	DHEAsulfate_bySULT2B_PPARD	DAM1	Homeostasis 1	Signaling by Dehydroepiandrosterone	sig	non-sig	non-sig	non-sig
CPI-CS0D89E7C19	DHEAsulfate_bySULT2B_PPARD	DAM1	Homeostasis 2	Signaling by Dehydroepiandrosterone	sig	non-sig	non-sig	non-sig
CPI-CS0D89E7C19	DHEAsulfate_bySULT2B_PPARD	Homeostasis 1	Homeostasis 2	Signaling by Dehydroepiandrosterone	sig	non-sig	non-sig	non-sig
CPI-CS0D89E7C19	DHEAsulfate_bySULT2B_PPARD	Homeostasis 2	Homeostasis 1	Signaling by Dehydroepiandrosterone	sig	non-sig	non-sig	non-sig
CPI-CS0D89E7C19	DHEAsulfate_bySULT2B_PPARD	Inflammation	Homeostasis 1	Signaling by Dehydroepiandrosterone	sig	non-sig	non-sig	non-sig
CPI-CS0D89E7C19	DHEAsulfate_bySULT2B_PPARD	Inflammation	Homeostasis 2	Signaling by Dehydroepiandrosterone	sig	non-sig	non-sig	non-sig
CPI-CS0D89E7C19	DHEAsulfate_bySULT2B_PPARD	T cell	Homeostasis 1	Signaling by Dehydroepiandrosterone	sig	non-sig	non-sig	non-sig
CPI-CS0D89E7C19	DHEAsulfate_bySULT2B_PPARD	MHC 1	Homeostasis 1	Signaling by Dehydroepiandrosterone	sig	non-sig	non-sig	non-sig
CPI-CS0D89E7C19	DHEAsulfate_bySULT2B_PPARD	MHC 2	Homeostasis 1	Signaling by Dehydroepiandrosterone	sig	non-sig	non-sig	non-sig
CPI-CS0D89E7C19	DHEAsulfate_bySULT2B_PPARD	Macrophage	Homeostasis 1	Signaling by Dehydroepiandrosterone	sig	non-sig	non-sig	non-sig
CPI-CS0D89E7C19	DHEAsulfate_bySULT2B_PPARD	Macrophage	Homeostasis 2	Signaling by Dehydroepiandrosterone	sig	non-sig	non-sig	non-sig
CPI-CS0D89E7C19	DHEAsulfate_bySULT2B_PPARD	Monocyte	Homeostasis 2	Signaling by Dehydroepiandrosterone	sig	non-sig	non-sig	non-sig
CPI-CS0D89E7C19	DHEAsulfate_bySULT2B_PPARD	Proliferation	Homeostasis 2	Signaling by Dehydroepiandrosterone	sig	non-sig	non-sig	non-sig
CPI-CS0D89E7C19	DHEAsulfate_bySULT2B_PPARD	Tau Microglia	Homeostasis 1	Signaling by Dehydroepiandrosterone	sig	non-sig	non-sig	non-sig
CPI-CS0D89E7C19	DHEAsulfate_bySULT2B_PPARD	Tau Microglia	Homeostasis 2	Signaling by Dehydroepiandrosterone	sig	non-sig	non-sig	non-sig
CPI-CS0412B081A	DHEAsulfate_bySULT2B_PPARG	Homeostasis 2	Macrophage	Signaling by Dehydroepiandrosterone	sig	sig	non-sig	non-sig
CPI-CS0412B081A	DHEAsulfate_bySULT2B_PPARG	Inflammation	Macrophage	Signaling by Dehydroepiandrosterone	sig	non-sig	non-sig	non-sig
CPI-CS0412B081A	DHEAsulfate_bySULT2B_PPARG	T cell	Macrophage	Signaling by Dehydroepiandrosterone	sig	sig	non-sig	non-sig
CPI-SS068ACD209	EFNA5_EPHB2	Homeostasis 2	DAM1	Signaling by Ephrin	sig	non-sig	non-sig	non-sig
CPI-SS068ACD209	EFNA5_EPHB2	Homeostasis 2	Tau Microglia	Signaling by Ephrin	sig	non-sig	non-sig	non-sig
CPI-SS068ACD209	EFNA5_EPHB2	Inflammation	DAM1	Signaling by Ephrin	sig	non-sig	non-sig	non-sig
CPI-SS068ACD209	EFNA5_EPHB2	Inflammation	Tau Microglia	Signaling by Ephrin	sig	non-sig	non-sig	non-sig
CPI-SS0FC42EC80	EREG_ERBB4	Monocyte	Inflammation	Signaling by Epidermal growth factor	sig	non-sig	non-sig	non-sig
CPI-SS060B846D1	HBEGF_ERBB4	MHC 1	T cell	Signaling by Epidermal growth factor	sig	non-sig	non-sig	non-sig
CPI-SS060B846D1	HBEGF_ERBB4	MHC 2	Homeostasis 1	Signaling by Epidermal growth factor	sig	non-sig	non-sig	non-sig
CPI-SS060B846D1	HBEGF_ERBB4	MHC 2	Macrophage	Signaling by Epidermal growth factor	sig	non-sig	non-sig	non-sig
CPI-SS060B846D1	HBEGF_ERBB4	Monocyte	Monocyte	Signaling by Epidermal growth factor	sig	non-sig	non-sig	non-sig
CPI-SS0BD5C2A23	NRG1_ERBB4	Homeostasis 1	T cell	Signaling by Neuregulin	sig	non-sig	non-sig	non-sig
CPI-SS0BD5C2A23	NRG1_ERBB4	Proliferation	T cell	Signaling by Neuregulin	sig	non-sig	non-sig	non-sig
CPI-SS0E063192D	NRG2_ERBB4	Homeostasis 1	T cell	Signaling by Neuregulin	sig	non-sig	non-sig	non-sig
CPI-SS0E063192D	NRG2_ERBB4	Inflammation	Homeostasis 1	Signaling by Neuregulin	sig	non-sig	non-sig	non-sig
CPI-SS0E063192D	NRG2_ERBB4	T cell	Homeostasis 1	Signaling by Neuregulin	sig	non-sig	non-sig	non-sig
CPI-SS0E063192D	NRG2_ERBB4	Proliferation	Homeostasis 1	Signaling by Neuregulin	sig	sig	non-sig	non-sig
CPI-SS0D5E30C6C	NRG3_ERBB4	Homeostasis 1	T cell	Signaling by Neuregulin	sig	non-sig	non-sig	non-sig
CPI-SS0D5E30C6C	NRG3_ERBB4	T cell	Homeostasis 1	Signaling by Neuregulin	sig	non-sig	non-sig	non-sig
CPI-SS0627D0E22	NRG4_ERBB4	Homeostasis 1	Homeostasis 1	Signaling by Neuregulin	sig	sig	non-sig	non-sig
CPI-SS0627D0E22	NRG4_ERBB4	Homeostasis 1	T cell	Signaling by Neuregulin	sig	non-sig	non-sig	non-sig
CPI-SS0627D0E22	NRG4_ERBB4	Homeostasis 2	Homeostasis 1	Signaling by Neuregulin	sig	sig	non-sig	non-sig
CPI-SS0627D0E22	NRG4_ERBB4	Homeostasis 2	Macrophage	Signaling by Neuregulin	sig	non-sig	non-sig	non-sig
CPI-SS0627D0E22	NRG4_ERBB4	Inflammation	Homeostasis 1	Signaling by Neuregulin	sig	non-sig	non-sig	non-sig
CPI-SS0627D0E22	NRG4_ERBB4	Inflammation	T cell	Signaling by Neuregulin	sig	non-sig	non-sig	non-sig
CPI-SS0627D0E22	NRG4_ERBB4	MHC 1	Homeostasis 1	Signaling by Neuregulin	sig	sig	non-sig	non-sig
CPI-SS0627D0E22	NRG4_ERBB4	MHC 1	Macrophage	Signaling by Neuregulin	sig	non-sig	non-sig	non-sig
CPI-SS0627D0E22	NRG4_ERBB4	MHC 2	Homeostasis 1	Signaling by Neuregulin	sig	non-sig	non-sig	non-sig
CPI-SS019D9440E	NRXN1_ADGRL1	Homeostasis 1	Inflammation	Signaling by Neurexin	sig	non-sig	non-sig	non-sig
CPI-SS019D9440E	NRXN1_ADGRL1	Homeostasis 1	Monocyte	Signaling by Neurexin	sig	sig	non-sig	non-sig
CPI-SS05E4F3F47	NRXN3_ADGRL1	Homeostasis 1	Inflammation	Signaling by Neurexin	sig	non-sig	non-sig	non-sig
CPI-SS05E4F3F47	NRXN3_ADGRL1	Homeostasis 1	Monocyte	Signaling by Neurexin	sig	sig	non-sig	non-sig
CPI-SS05E4F3F47	NRXN3_ADGRL1	Proliferation	DAM1	Signaling by Neurexin	sig	non-sig	non-sig	non-sig
CPI-SS05E4F3F47	NRXN3_ADGRL1	Proliferation	Homeostasis 1	Signaling by Neurexin	sig	non-sig	non-sig	non-sig
CPI-SS05E4F3F47	NRXN3_ADGRL1	Proliferation	Homeostasis 2	Signaling by Neurexin	sig	non-sig	non-sig	non-sig
CPI-SS05E4F3F47	NRXN3_ADGRL1	Proliferation	Inflammation	Signaling by Neurexin	sig	non-sig	non-sig	non-sig
CPI-SS05E4F3F47	NRXN3_ADGRL1	Proliferation	T cell	Signaling by Neurexin	sig	non-sig	non-sig	non-sig
CPI-SS05E4F3F47	NRXN3_ADGRL1	Proliferation	MHC 1	Signaling by Neurexin	sig	non-sig	non-sig	non-sig
CPI-SS05E4F3F47	NRXN3_ADGRL1	Proliferation	MHC 2	Signaling by Neurexin	sig	non-sig	non-sig	non-sig
CPI-SS05E4F3F47	NRXN3_ADGRL1	Proliferation	Macrophage	Signaling by Neurexin	sig	non-sig	non-sig	non-sig
CPI-SS05E4F3F47	NRXN3_ADGRL1	Proliferation	Monocyte	Signaling by Neurexin	sig	non-sig	non-sig	non-sig
CPI-SS05E4F3F47	NRXN3_ADGRL1	Proliferation	Proliferation	Signaling by Neurexin	sig	non-sig	non-sig	non-sig
CPI-SS09159B142	TENM2_ADGRL1	Homeostasis 1	Homeostasis 2	Signaling by Teneurin	sig	non-sig	non-sig	non-sig
CPI-SS09159B142	TENM2_ADGRL1	Homeostasis 1	Inflammation	Signaling by Teneurin	sig	non-sig	non-sig	non-sig
CPI-SS09159B142	TENM2_ADGRL1	Homeostasis 1	T cell	Signaling by Teneurin	sig	non-sig	non-sig	non-sig
CPI-SS09159B142	TENM2_ADGRL1	Homeostasis 1	Macrophage	Signaling by Teneurin	sig	non-sig	non-sig	non-sig
CPI-SS09159B142	TENM2_ADGRL1	Homeostasis 1	Monocyte	Signaling by Teneurin	sig	sig	non-sig	non-sig
CPI-SS09159B142	TENM2_ADGRL1	Proliferation	DAM1	Signaling by Teneurin	sig	non-sig	non-sig	non-sig
CPI-SS09159B142	TENM2_ADGRL1	Proliferation	Homeostasis 1	Signaling by Teneurin	sig	non-sig	non-sig	non-sig
CPI-SS09159B142	TENM2_ADGRL1	Proliferation	Inflammation	Signaling by Teneurin	sig	non-sig	non-sig	non-sig
CPI-SS0EC12EAD9	TENM4_ADGRL1	Homeostasis 1	DAM1	Signaling by Teneurin	sig	non-sig	non-sig	non-sig
CPI-SS0EC12EAD9	TENM4_ADGRL1	Homeostasis 1	Homeostasis 1	Signaling by Teneurin	sig	non-sig	non-sig	non-sig
CPI-SS0EC12EAD9	TENM4_ADGRL1	Homeostasis 1	Inflammation	Signaling by Teneurin	sig	non-sig	non-sig	non-sig
CPI-SS0EC12EAD9	TENM4_ADGRL1	Homeostasis 1	Proliferation	Signaling by Teneurin	sig	non-sig	non-sig	non-sig
CPI-SS0EC12EAD9	TENM4_ADGRL1	Homeostasis 1	Tau Microglia	Signaling by Teneurin	sig	non-sig	non-sig	non-sig
CPI-SS0EC12EAD9	TENM4_ADGRL1	Inflammation	DAM1	Signaling by Teneurin	sig	non-sig	non-sig	non-sig
CPI-SS0EC12EAD9	TENM4_ADGRL1	Inflammation	Homeostasis 1	Signaling by Teneurin	sig	non-sig	non-sig	non-sig
CPI-SS0EC12EAD9	TENM4_ADGRL1	Inflammation	Homeostasis 2	Signaling by Teneurin	sig	non-sig	non-sig	non-sig
CPI-SS0EC12EAD9	TENM4_ADGRL1	Inflammation	Inflammation	Signaling by Teneurin	sig	non-sig	non-sig	non-sig
CPI-SS0EC12EAD9	TENM4_ADGRL1	Inflammation	T cell	Signaling by Teneurin	sig	non-sig	non-sig	non-sig
CPI-SS0EC12EAD9	TENM4_ADGRL1	Inflammation	MHC 1	Signaling by Teneurin	sig	non-sig	non-sig	non-sig
CPI-SS0EC12EAD9	TENM4_ADGRL1	Inflammation	Macrophage	Signaling by Teneurin	sig	non-sig	non-sig	non-sig
CPI-SS0EC12EAD9	TENM4_ADGRL1	Inflammation	Monocyte	Signaling by Teneurin	sig	non-sig	non-sig	non-sig
CPI-SS0EC12EAD9	TENM4_ADGRL1	Inflammation	Proliferation	Signaling by Teneurin	sig	non-sig	non-sig	non-sig
CPI-SS0EC12EAD9	TENM4_ADGRL1	Inflammation	Tau Microglia	Signaling by Teneurin	sig	non-sig	non-sig	non-sig
CPI-SS038A612D7	TENM1_ADGRL3	Inflammation	Homeostasis 1	Signaling by Teneurin	sig	non-sig	non-sig	non-sig
CPI-SS0BCB3D402	TENM2_ADGRL3	MHC 1	Homeostasis 1	Signaling by Teneurin	sig	non-sig	non-sig	non-sig
CPI-SS0EA023E51	TENM3_ADGRL3	Inflammation	Homeostasis 1	Signaling by Teneurin	sig	non-sig	non-sig	non-sig
CPI-SS01F00A48A	TENM4_ADGRL3	Homeostasis 1	Macrophage	Signaling by Teneurin	sig	non-sig	non-sig	non-sig
CPI-SS01F00A48A	TENM4_ADGRL3	Inflammation	Homeostasis 1	Signaling by Teneurin	sig	non-sig	non-sig	non-sig
CPI-SS01F00A48A	TENM4_ADGRL3	Inflammation	T cell	Signaling by Teneurin	sig	non-sig	non-sig	non-sig
CPI-SS01F00A48A	TENM4_ADGRL3	Inflammation	Macrophage	Signaling by Teneurin	sig	non-sig	non-sig	non-sig
CPI-SS01F00A48A	TENM4_ADGRL3	Inflammation	Monocyte	Signaling by Teneurin	sig	non-sig	non-sig	non-sig
CPI-SS01F00A48A	TENM4_ADGRL3	Inflammation	Proliferation	Signaling by Teneurin	sig	non-sig	non-sig	non-sig
CPI-SS01F00A48A	TENM4_ADGRL3	Tau Microglia	Homeostasis 2	Signaling by Teneurin	sig	non-sig	non-sig	non-sig
CPI-SS0F6BE4D47	UNC5A_ADGRL3	Homeostasis 1	Macrophage		sig	non-sig	non-sig	non-sig
CPI-SS0F6BE4D47	UNC5A_ADGRL3	MHC 2	Homeostasis 1		sig	non-sig	non-sig	non-sig
CPI-SS0F6BE4D47	UNC5A_ADGRL3	Proliferation	Homeostasis 1		sig	sig	non-sig	non-sig
CPI-SS0F6BE4D47	UNC5A_ADGRL3	Proliferation	Macrophage		sig	non-sig	non-sig	non-sig
CPI-SS021718DBF	TENM2_ADGRL2	Homeostasis 1	Homeostasis 2	Signaling by Teneurin	sig	non-sig	non-sig	non-sig
CPI-SS021718DBF	TENM2_ADGRL2	Homeostasis 1	T cell	Signaling by Teneurin	sig	non-sig	non-sig	non-sig
CPI-SS021718DBF	TENM2_ADGRL2	Homeostasis 1	Monocyte	Signaling by Teneurin	sig	sig	non-sig	non-sig
CPI-SS021718DBF	TENM2_ADGRL2	Homeostasis 1	Proliferation	Signaling by Teneurin	sig	non-sig	non-sig	non-sig
CPI-SS021718DBF	TENM2_ADGRL2	Homeostasis 1	Tau Microglia	Signaling by Teneurin	sig	non-sig	non-sig	non-sig
CPI-SS021718DBF	TENM2_ADGRL2	Proliferation	Homeostasis 1	Signaling by Teneurin	sig	non-sig	non-sig	non-sig
CPI-SS021718DBF	TENM2_ADGRL2	Proliferation	Proliferation	Signaling by Teneurin	sig	non-sig	non-sig	non-sig
CPI-SS0FD44484F	TENM4_ADGRL2	Homeostasis 1	Homeostasis 1	Signaling by Teneurin	sig	non-sig	non-sig	non-sig
CPI-SS0FD44484F	TENM4_ADGRL2	Homeostasis 1	Proliferation	Signaling by Teneurin	sig	non-sig	non-sig	non-sig
CPI-SS0FD44484F	TENM4_ADGRL2	Inflammation	DAM1	Signaling by Teneurin	sig	non-sig	non-sig	non-sig
CPI-SS0FD44484F	TENM4_ADGRL2	Inflammation	Homeostasis 1	Signaling by Teneurin	sig	non-sig	non-sig	non-sig
CPI-SS0FD44484F	TENM4_ADGRL2	Inflammation	Homeostasis 2	Signaling by Teneurin	sig	non-sig	non-sig	non-sig
CPI-SS0FD44484F	TENM4_ADGRL2	Inflammation	T cell	Signaling by Teneurin	sig	non-sig	non-sig	non-sig
CPI-SS0FD44484F	TENM4_ADGRL2	Inflammation	MHC 1	Signaling by Teneurin	sig	non-sig	non-sig	non-sig
CPI-SS0FD44484F	TENM4_ADGRL2	Inflammation	Macrophage	Signaling by Teneurin	sig	non-sig	non-sig	non-sig
CPI-SS0FD44484F	TENM4_ADGRL2	Inflammation	Monocyte	Signaling by Teneurin	sig	non-sig	non-sig	non-sig
CPI-SS0FD44484F	TENM4_ADGRL2	Inflammation	Proliferation	Signaling by Teneurin	sig	non-sig	non-sig	non-sig
CPI-SS0FD44484F	TENM4_ADGRL2	Proliferation	Macrophage	Signaling by Teneurin	sig	sig	non-sig	non-sig
CPI-SC0CF28722B	LGALS9_BCR_CD45_CD22	MHC 2	Homeostasis 2	Signaling by Galectin	sig	non-sig	non-sig	non-sig
CPI-SC0CF28722B	LGALS9_BCR_CD45_CD22	MHC 2	T cell	Signaling by Galectin	sig	non-sig	non-sig	non-sig
CPI-SC0CF28722B	LGALS9_BCR_CD45_CD22	MHC 2	MHC 1	Signaling by Galectin	sig	non-sig	non-sig	non-sig
CPI-SC0CF28722B	LGALS9_BCR_CD45_CD22	MHC 2	Monocyte	Signaling by Galectin	sig	non-sig	non-sig	non-sig
CPI-SC0CF28722B	LGALS9_BCR_CD45_CD22	Proliferation	Monocyte	Signaling by Galectin	sig	non-sig	non-sig	non-sig
CPI-SS0E23CEB91	LGALS9_HAVCR2	DAM1	Proliferation	Signaling by Galectin	sig	non-sig	non-sig	non-sig
CPI-SS0E23CEB91	LGALS9_HAVCR2	Homeostasis 1	Homeostasis 1	Signaling by Galectin	sig	non-sig	non-sig	non-sig
CPI-SS0E23CEB91	LGALS9_HAVCR2	Homeostasis 2	Homeostasis 1	Signaling by Galectin	sig	non-sig	non-sig	non-sig
CPI-SS0E23CEB91	LGALS9_HAVCR2	MHC 2	Proliferation	Signaling by Galectin	sig	non-sig	non-sig	non-sig
CPI-SS0E23CEB91	LGALS9_HAVCR2	Monocyte	Homeostasis 2	Signaling by Galectin	sig	non-sig	non-sig	non-sig
CPI-SS0E23CEB91	LGALS9_HAVCR2	Proliferation	Homeostasis 1	Signaling by Galectin	sig	non-sig	non-sig	non-sig
CPI-SS0E23CEB91	LGALS9_HAVCR2	Tau Microglia	Homeostasis 2	Signaling by Galectin	sig	sig	non-sig	non-sig
CPI-SS0E23CEB91	LGALS9_HAVCR2	Tau Microglia	Inflammation	Signaling by Galectin	sig	non-sig	non-sig	non-sig
CPI-SS0CE693E3E	LGALS9_P4HB	Homeostasis 1	MHC 1	Signaling by Galectin	sig	non-sig	non-sig	non-sig
CPI-SS0CE693E3E	LGALS9_P4HB	Homeostasis 1	Macrophage	Signaling by Galectin	sig	non-sig	non-sig	non-sig
CPI-SS0CE693E3E	LGALS9_P4HB	Inflammation	Homeostasis 1	Signaling by Galectin	sig	non-sig	non-sig	non-sig
CPI-SS0CE693E3E	LGALS9_P4HB	Inflammation	Monocyte	Signaling by Galectin	sig	non-sig	non-sig	non-sig
CPI-SS0CE693E3E	LGALS9_P4HB	MHC 1	Homeostasis 1	Signaling by Galectin	sig	non-sig	non-sig	non-sig
CPI-SS0CE693E3E	LGALS9_P4HB	MHC 2	Homeostasis 2	Signaling by Galectin	sig	non-sig	non-sig	non-sig
CPI-SS0CE693E3E	LGALS9_P4HB	MHC 2	Tau Microglia	Signaling by Galectin	sig	non-sig	non-sig	non-sig
CPI-SS0CE693E3E	LGALS9_P4HB	Monocyte	MHC 2	Signaling by Galectin	sig	non-sig	non-sig	non-sig
CPI-SS0CE693E3E	LGALS9_P4HB	Proliferation	Homeostasis 1	Signaling by Galectin	sig	non-sig	non-sig	non-sig
CPI-SS0CE693E3E	LGALS9_P4HB	Proliferation	MHC 1	Signaling by Galectin	sig	non-sig	non-sig	non-sig
CPI-SS0CE693E3E	LGALS9_P4HB	Proliferation	Macrophage	Signaling by Galectin	sig	non-sig	non-sig	non-sig
CPI-SS0CE693E3E	LGALS9_P4HB	Tau Microglia	Homeostasis 1	Signaling by Galectin	sig	sig	non-sig	non-sig
CPI-CS03487854B	Glutamate_byGLS_and_SLC1A2_GRIA1	DAM1	Homeostasis 1	Signaling by Glutamate	sig	non-sig	non-sig	non-sig
CPI-CS03487854B	Glutamate_byGLS_and_SLC1A2_GRIA1	DAM1	Proliferation	Signaling by Glutamate	sig	non-sig	non-sig	non-sig
CPI-CS03487854B	Glutamate_byGLS_and_SLC1A2_GRIA1	T cell	MHC 1	Signaling by Glutamate	sig	non-sig	non-sig	non-sig
CPI-CS03487854B	Glutamate_byGLS_and_SLC1A2_GRIA1	Tau Microglia	Homeostasis 2	Signaling by Glutamate	sig	non-sig	non-sig	non-sig
CPI-CS0FC6DD1EA	Glutamate_byGLS_and_SLC1A3_GRIA1	Homeostasis 1	DAM1	Signaling by Glutamate	sig	non-sig	non-sig	non-sig
CPI-CS0FC6DD1EA	Glutamate_byGLS_and_SLC1A3_GRIA1	Homeostasis 1	Homeostasis 2	Signaling by Glutamate	sig	non-sig	non-sig	non-sig
CPI-CS0FC6DD1EA	Glutamate_byGLS_and_SLC1A3_GRIA1	Homeostasis 1	Inflammation	Signaling by Glutamate	sig	non-sig	non-sig	non-sig
CPI-CS0FC6DD1EA	Glutamate_byGLS_and_SLC1A3_GRIA1	Homeostasis 1	T cell	Signaling by Glutamate	sig	non-sig	non-sig	non-sig
CPI-CS0FC6DD1EA	Glutamate_byGLS_and_SLC1A3_GRIA1	Homeostasis 1	MHC 1	Signaling by Glutamate	sig	non-sig	non-sig	non-sig
CPI-CS0FC6DD1EA	Glutamate_byGLS_and_SLC1A3_GRIA1	Homeostasis 1	Monocyte	Signaling by Glutamate	sig	non-sig	non-sig	non-sig
CPI-CS0FC6DD1EA	Glutamate_byGLS_and_SLC1A3_GRIA1	Homeostasis 1	Proliferation	Signaling by Glutamate	sig	non-sig	non-sig	non-sig
CPI-CS0FC6DD1EA	Glutamate_byGLS_and_SLC1A3_GRIA1	Homeostasis 1	Tau Microglia	Signaling by Glutamate	sig	non-sig	non-sig	non-sig
CPI-CS0FC6DD1EA	Glutamate_byGLS_and_SLC1A3_GRIA1	Homeostasis 2	DAM1	Signaling by Glutamate	sig	non-sig	non-sig	non-sig
CPI-CS0FC6DD1EA	Glutamate_byGLS_and_SLC1A3_GRIA1	Homeostasis 2	Homeostasis 1	Signaling by Glutamate	sig	non-sig	non-sig	non-sig
CPI-CS0FC6DD1EA	Glutamate_byGLS_and_SLC1A3_GRIA1	Homeostasis 2	Homeostasis 2	Signaling by Glutamate	sig	non-sig	non-sig	non-sig
CPI-CS0FC6DD1EA	Glutamate_byGLS_and_SLC1A3_GRIA1	Homeostasis 2	Inflammation	Signaling by Glutamate	sig	non-sig	non-sig	non-sig
CPI-CS0FC6DD1EA	Glutamate_byGLS_and_SLC1A3_GRIA1	Homeostasis 2	T cell	Signaling by Glutamate	sig	non-sig	non-sig	non-sig
CPI-CS0FC6DD1EA	Glutamate_byGLS_and_SLC1A3_GRIA1	Homeostasis 2	MHC 1	Signaling by Glutamate	sig	non-sig	non-sig	non-sig
CPI-CS0FC6DD1EA	Glutamate_byGLS_and_SLC1A3_GRIA1	Homeostasis 2	MHC 2	Signaling by Glutamate	sig	non-sig	non-sig	non-sig
CPI-CS0FC6DD1EA	Glutamate_byGLS_and_SLC1A3_GRIA1	Homeostasis 2	Macrophage	Signaling by Glutamate	sig	non-sig	non-sig	non-sig
CPI-CS0FC6DD1EA	Glutamate_byGLS_and_SLC1A3_GRIA1	Homeostasis 2	Monocyte	Signaling by Glutamate	sig	non-sig	non-sig	non-sig
CPI-CS0FC6DD1EA	Glutamate_byGLS_and_SLC1A3_GRIA1	Homeostasis 2	Proliferation	Signaling by Glutamate	sig	non-sig	non-sig	non-sig
CPI-CS0FC6DD1EA	Glutamate_byGLS_and_SLC1A3_GRIA1	Homeostasis 2	Tau Microglia	Signaling by Glutamate	sig	non-sig	non-sig	non-sig
CPI-CS0FC6DD1EA	Glutamate_byGLS_and_SLC1A3_GRIA1	MHC 1	DAM1	Signaling by Glutamate	sig	non-sig	non-sig	non-sig
CPI-CS0FC6DD1EA	Glutamate_byGLS_and_SLC1A3_GRIA1	MHC 1	MHC 1	Signaling by Glutamate	sig	non-sig	non-sig	non-sig
CPI-CS0FC6DD1EA	Glutamate_byGLS_and_SLC1A3_GRIA1	Proliferation	Homeostasis 1	Signaling by Glutamate	sig	non-sig	non-sig	non-sig
CPI-CS0FC6DD1EA	Glutamate_byGLS_and_SLC1A3_GRIA1	Proliferation	Proliferation	Signaling by Glutamate	sig	non-sig	non-sig	non-sig
CPI-CS00CF3D781	Glutamate_byGLS_and_SLC17A7_GRIA2	Homeostasis 1	DAM1	Signaling by Glutamate	sig	non-sig	non-sig	non-sig
CPI-CS00CF3D781	Glutamate_byGLS_and_SLC17A7_GRIA2	Homeostasis 1	MHC 1	Signaling by Glutamate	sig	non-sig	non-sig	non-sig
CPI-CS00CF3D781	Glutamate_byGLS_and_SLC17A7_GRIA2	Homeostasis 1	Proliferation	Signaling by Glutamate	sig	non-sig	non-sig	non-sig
CPI-CS00CF3D781	Glutamate_byGLS_and_SLC17A7_GRIA2	Homeostasis 2	Homeostasis 1	Signaling by Glutamate	sig	non-sig	non-sig	non-sig
CPI-CS00CF3D781	Glutamate_byGLS_and_SLC17A7_GRIA2	T cell	Homeostasis 1	Signaling by Glutamate	sig	non-sig	non-sig	non-sig
CPI-CS00CF3D781	Glutamate_byGLS_and_SLC17A7_GRIA2	MHC 1	Proliferation	Signaling by Glutamate	sig	non-sig	non-sig	non-sig
CPI-CS00CF3D781	Glutamate_byGLS_and_SLC17A7_GRIA2	MHC 2	Homeostasis 1	Signaling by Glutamate	sig	non-sig	non-sig	non-sig
CPI-CS00CF3D781	Glutamate_byGLS_and_SLC17A7_GRIA2	Proliferation	MHC 1	Signaling by Glutamate	sig	non-sig	non-sig	non-sig
CPI-CS00CF3D781	Glutamate_byGLS_and_SLC17A7_GRIA2	Proliferation	Proliferation	Signaling by Glutamate	sig	non-sig	non-sig	non-sig
CPI-CS00CF3D781	Glutamate_byGLS_and_SLC17A7_GRIA2	Tau Microglia	Homeostasis 1	Signaling by Glutamate	sig	non-sig	non-sig	non-sig
CPI-CS0D893EB03	Glutamate_byGLS_and_SLC1A1_GRIA2	Homeostasis 2	Homeostasis 1	Signaling by Glutamate	sig	sig	non-sig	non-sig
CPI-CS0D893EB03	Glutamate_byGLS_and_SLC1A1_GRIA2	Inflammation	Homeostasis 1	Signaling by Glutamate	sig	sig	non-sig	non-sig
CPI-CS0D893EB03	Glutamate_byGLS_and_SLC1A1_GRIA2	MHC 2	Homeostasis 1	Signaling by Glutamate	sig	non-sig	non-sig	non-sig
CPI-CS00BBBEE62	Glutamate_byGLS_and_SLC1A2_GRIA2	DAM1	Proliferation	Signaling by Glutamate	sig	non-sig	non-sig	non-sig
CPI-CS00BBBEE62	Glutamate_byGLS_and_SLC1A2_GRIA2	Homeostasis 1	Proliferation	Signaling by Glutamate	sig	non-sig	non-sig	non-sig
CPI-CS00BBBEE62	Glutamate_byGLS_and_SLC1A2_GRIA2	Inflammation	Homeostasis 1	Signaling by Glutamate	sig	non-sig	non-sig	non-sig
CPI-CS00BBBEE62	Glutamate_byGLS_and_SLC1A2_GRIA2	T cell	MHC 1	Signaling by Glutamate	sig	non-sig	non-sig	non-sig
CPI-CS00BBBEE62	Glutamate_byGLS_and_SLC1A2_GRIA2	Macrophage	MHC 1	Signaling by Glutamate	sig	non-sig	non-sig	non-sig
CPI-CS0E765613E	Glutamate_byGLS_and_SLC1A3_GRIA2	Homeostasis 1	DAM1	Signaling by Glutamate	sig	non-sig	non-sig	non-sig
CPI-CS0E765613E	Glutamate_byGLS_and_SLC1A3_GRIA2	Homeostasis 1	MHC 1	Signaling by Glutamate	sig	non-sig	non-sig	non-sig
CPI-CS0E765613E	Glutamate_byGLS_and_SLC1A3_GRIA2	Homeostasis 1	Macrophage	Signaling by Glutamate	sig	non-sig	non-sig	non-sig
CPI-CS0E765613E	Glutamate_byGLS_and_SLC1A3_GRIA2	Homeostasis 1	Proliferation	Signaling by Glutamate	sig	non-sig	non-sig	non-sig
CPI-CS0E765613E	Glutamate_byGLS_and_SLC1A3_GRIA2	Homeostasis 2	DAM1	Signaling by Glutamate	sig	non-sig	non-sig	non-sig
CPI-CS0E765613E	Glutamate_byGLS_and_SLC1A3_GRIA2	Homeostasis 2	MHC 1	Signaling by Glutamate	sig	non-sig	non-sig	non-sig
CPI-CS0E765613E	Glutamate_byGLS_and_SLC1A3_GRIA2	Homeostasis 2	Macrophage	Signaling by Glutamate	sig	non-sig	non-sig	non-sig
CPI-CS0E765613E	Glutamate_byGLS_and_SLC1A3_GRIA2	Homeostasis 2	Monocyte	Signaling by Glutamate	sig	non-sig	non-sig	non-sig
CPI-CS0E765613E	Glutamate_byGLS_and_SLC1A3_GRIA2	Homeostasis 2	Proliferation	Signaling by Glutamate	sig	non-sig	non-sig	non-sig
CPI-CS0E765613E	Glutamate_byGLS_and_SLC1A3_GRIA2	MHC 1	MHC 1	Signaling by Glutamate	sig	non-sig	non-sig	non-sig
CPI-CS0E765613E	Glutamate_byGLS_and_SLC1A3_GRIA2	Proliferation	Homeostasis 1	Signaling by Glutamate	sig	non-sig	non-sig	non-sig
CPI-CS0E765613E	Glutamate_byGLS_and_SLC1A3_GRIA2	Proliferation	Proliferation	Signaling by Glutamate	sig	non-sig	non-sig	non-sig
CPI-CS0D4790CB0	Glutamate_byGLS_and_SLC1A6_GRIA2	MHC 2	Homeostasis 1	Signaling by Glutamate	sig	sig	non-sig	non-sig
CPI-CS07CF0C9B9	Glutamate_byGLS2_and_SLC17A7_GRIA2	MHC 2	Homeostasis 1	Signaling by Glutamate	sig	sig	non-sig	non-sig
CPI-CS0E5DBD27E	Glutamate_byGLS2_and_SLC1A1_GRIA2	MHC 2	Homeostasis 1	Signaling by Glutamate	sig	non-sig	non-sig	non-sig
CPI-CS07040A8BB	Glutamate_byGLS2_and_SLC1A2_GRIA2	MHC 2	Homeostasis 1	Signaling by Glutamate	sig	sig	non-sig	non-sig
CPI-CS0D028DAA4	Glutamate_byGLS2_and_SLC1A3_GRIA2	MHC 2	Homeostasis 1	Signaling by Glutamate	sig	sig	non-sig	non-sig
CPI-CS096A4BF1B	Glutamate_byGLS2_and_SLC1A6_GRIA2	MHC 2	Homeostasis 1	Signaling by Glutamate	sig	sig	non-sig	non-sig
CPI-CS07BBA568D	Glutamate_byGLS_and_SLC1A2_GRIA3	DAM1	Homeostasis 1	Signaling by Glutamate	sig	non-sig	non-sig	non-sig
CPI-CS07BBA568D	Glutamate_byGLS_and_SLC1A2_GRIA3	DAM1	MHC 1	Signaling by Glutamate	sig	non-sig	non-sig	non-sig
CPI-CS07BBA568D	Glutamate_byGLS_and_SLC1A2_GRIA3	DAM1	Proliferation	Signaling by Glutamate	sig	non-sig	non-sig	non-sig
CPI-CS07BBA568D	Glutamate_byGLS_and_SLC1A2_GRIA3	T cell	MHC 1	Signaling by Glutamate	sig	non-sig	non-sig	non-sig
CPI-CS0692512DE	Glutamate_byGLS_and_SLC1A3_GRIA3	Homeostasis 1	DAM1	Signaling by Glutamate	sig	non-sig	non-sig	non-sig
CPI-CS0692512DE	Glutamate_byGLS_and_SLC1A3_GRIA3	Homeostasis 1	Homeostasis 2	Signaling by Glutamate	sig	non-sig	non-sig	non-sig
CPI-CS0692512DE	Glutamate_byGLS_and_SLC1A3_GRIA3	Homeostasis 1	Inflammation	Signaling by Glutamate	sig	non-sig	non-sig	non-sig
CPI-CS0692512DE	Glutamate_byGLS_and_SLC1A3_GRIA3	Homeostasis 1	T cell	Signaling by Glutamate	sig	non-sig	non-sig	non-sig
CPI-CS0692512DE	Glutamate_byGLS_and_SLC1A3_GRIA3	Homeostasis 1	MHC 1	Signaling by Glutamate	sig	non-sig	non-sig	non-sig
CPI-CS0692512DE	Glutamate_byGLS_and_SLC1A3_GRIA3	Homeostasis 1	Macrophage	Signaling by Glutamate	sig	non-sig	non-sig	non-sig
CPI-CS0692512DE	Glutamate_byGLS_and_SLC1A3_GRIA3	Homeostasis 1	Monocyte	Signaling by Glutamate	sig	non-sig	non-sig	non-sig
CPI-CS0692512DE	Glutamate_byGLS_and_SLC1A3_GRIA3	Homeostasis 1	Proliferation	Signaling by Glutamate	sig	non-sig	non-sig	non-sig
CPI-CS0692512DE	Glutamate_byGLS_and_SLC1A3_GRIA3	Homeostasis 1	Tau Microglia	Signaling by Glutamate	sig	non-sig	non-sig	non-sig
CPI-CS0692512DE	Glutamate_byGLS_and_SLC1A3_GRIA3	Homeostasis 2	DAM1	Signaling by Glutamate	sig	non-sig	non-sig	non-sig
CPI-CS0692512DE	Glutamate_byGLS_and_SLC1A3_GRIA3	Homeostasis 2	Homeostasis 1	Signaling by Glutamate	sig	non-sig	non-sig	non-sig
CPI-CS0692512DE	Glutamate_byGLS_and_SLC1A3_GRIA3	Homeostasis 2	Homeostasis 2	Signaling by Glutamate	sig	non-sig	non-sig	non-sig
CPI-CS0692512DE	Glutamate_byGLS_and_SLC1A3_GRIA3	Homeostasis 2	T cell	Signaling by Glutamate	sig	non-sig	non-sig	non-sig
CPI-CS0692512DE	Glutamate_byGLS_and_SLC1A3_GRIA3	Homeostasis 2	MHC 1	Signaling by Glutamate	sig	non-sig	non-sig	non-sig
CPI-CS0692512DE	Glutamate_byGLS_and_SLC1A3_GRIA3	Homeostasis 2	MHC 2	Signaling by Glutamate	sig	non-sig	non-sig	non-sig
CPI-CS0692512DE	Glutamate_byGLS_and_SLC1A3_GRIA3	Homeostasis 2	Macrophage	Signaling by Glutamate	sig	non-sig	non-sig	non-sig
CPI-CS0692512DE	Glutamate_byGLS_and_SLC1A3_GRIA3	Homeostasis 2	Monocyte	Signaling by Glutamate	sig	non-sig	non-sig	non-sig
CPI-CS0692512DE	Glutamate_byGLS_and_SLC1A3_GRIA3	Homeostasis 2	Proliferation	Signaling by Glutamate	sig	non-sig	non-sig	non-sig
CPI-CS0692512DE	Glutamate_byGLS_and_SLC1A3_GRIA3	Homeostasis 2	Tau Microglia	Signaling by Glutamate	sig	non-sig	non-sig	non-sig
CPI-CS0692512DE	Glutamate_byGLS_and_SLC1A3_GRIA3	MHC 1	MHC 1	Signaling by Glutamate	sig	non-sig	non-sig	non-sig
CPI-CS0692512DE	Glutamate_byGLS_and_SLC1A3_GRIA3	Proliferation	Homeostasis 1	Signaling by Glutamate	sig	non-sig	non-sig	non-sig
CPI-CS0692512DE	Glutamate_byGLS_and_SLC1A3_GRIA3	Proliferation	Proliferation	Signaling by Glutamate	sig	non-sig	non-sig	non-sig
CPI-CS0AB7504CD	Glutamate_byGLS_and_SLC17A7_GRIA4	Proliferation	Homeostasis 1	Signaling by Glutamate	sig	non-sig	non-sig	non-sig
CPI-CS056114BA1	Glutamate_byGLS_and_SLC1A2_GRIA4	DAM1	Proliferation	Signaling by Glutamate	sig	non-sig	non-sig	non-sig
CPI-CS056114BA1	Glutamate_byGLS_and_SLC1A2_GRIA4	T cell	MHC 1	Signaling by Glutamate	sig	non-sig	non-sig	non-sig
CPI-CS04BFC66DA	Glutamate_byGLS_and_SLC1A3_GRIA4	Homeostasis 1	DAM1	Signaling by Glutamate	sig	non-sig	non-sig	non-sig
CPI-CS04BFC66DA	Glutamate_byGLS_and_SLC1A3_GRIA4	Homeostasis 1	Homeostasis 2	Signaling by Glutamate	sig	non-sig	non-sig	non-sig
CPI-CS04BFC66DA	Glutamate_byGLS_and_SLC1A3_GRIA4	Homeostasis 1	T cell	Signaling by Glutamate	sig	non-sig	non-sig	non-sig
CPI-CS04BFC66DA	Glutamate_byGLS_and_SLC1A3_GRIA4	Homeostasis 1	MHC 1	Signaling by Glutamate	sig	non-sig	non-sig	non-sig
CPI-CS04BFC66DA	Glutamate_byGLS_and_SLC1A3_GRIA4	Homeostasis 1	Macrophage	Signaling by Glutamate	sig	non-sig	non-sig	non-sig
CPI-CS04BFC66DA	Glutamate_byGLS_and_SLC1A3_GRIA4	Homeostasis 1	Monocyte	Signaling by Glutamate	sig	non-sig	non-sig	non-sig
CPI-CS04BFC66DA	Glutamate_byGLS_and_SLC1A3_GRIA4	Homeostasis 2	DAM1	Signaling by Glutamate	sig	non-sig	non-sig	non-sig
CPI-CS04BFC66DA	Glutamate_byGLS_and_SLC1A3_GRIA4	Homeostasis 2	Homeostasis 2	Signaling by Glutamate	sig	non-sig	non-sig	non-sig
CPI-CS04BFC66DA	Glutamate_byGLS_and_SLC1A3_GRIA4	Homeostasis 2	T cell	Signaling by Glutamate	sig	non-sig	non-sig	non-sig
CPI-CS04BFC66DA	Glutamate_byGLS_and_SLC1A3_GRIA4	Homeostasis 2	MHC 1	Signaling by Glutamate	sig	non-sig	non-sig	non-sig
CPI-CS04BFC66DA	Glutamate_byGLS_and_SLC1A3_GRIA4	Homeostasis 2	Macrophage	Signaling by Glutamate	sig	non-sig	non-sig	non-sig
CPI-CS04BFC66DA	Glutamate_byGLS_and_SLC1A3_GRIA4	Homeostasis 2	Monocyte	Signaling by Glutamate	sig	non-sig	non-sig	non-sig
CPI-CS04BFC66DA	Glutamate_byGLS_and_SLC1A3_GRIA4	Homeostasis 2	Proliferation	Signaling by Glutamate	sig	non-sig	non-sig	non-sig
CPI-CS04BFC66DA	Glutamate_byGLS_and_SLC1A3_GRIA4	MHC 1	MHC 1	Signaling by Glutamate	sig	non-sig	non-sig	non-sig
CPI-CS04BFC66DA	Glutamate_byGLS_and_SLC1A3_GRIA4	Proliferation	Homeostasis 1	Signaling by Glutamate	sig	non-sig	non-sig	non-sig
CPI-CS04BFC66DA	Glutamate_byGLS_and_SLC1A3_GRIA4	Proliferation	Proliferation	Signaling by Glutamate	sig	non-sig	non-sig	non-sig
CPI-CS0F73C1DA9	Glutamate_byGLS_and_SLC17A7_GRIK1	Proliferation	Homeostasis 1	Signaling by Glutamate	sig	sig	non-sig	non-sig
CPI-CS0F73C1DA9	Glutamate_byGLS_and_SLC17A7_GRIK1	Proliferation	Proliferation	Signaling by Glutamate	sig	non-sig	non-sig	non-sig
CPI-CS034026D0F	Glutamate_byGLS_and_SLC1A2_GRIK1	DAM1	Homeostasis 1	Signaling by Glutamate	sig	non-sig	non-sig	non-sig
CPI-CS034026D0F	Glutamate_byGLS_and_SLC1A2_GRIK1	DAM1	Proliferation	Signaling by Glutamate	sig	non-sig	non-sig	non-sig
CPI-CS034026D0F	Glutamate_byGLS_and_SLC1A2_GRIK1	Inflammation	Homeostasis 1	Signaling by Glutamate	sig	non-sig	non-sig	non-sig
CPI-CS034026D0F	Glutamate_byGLS_and_SLC1A2_GRIK1	T cell	Homeostasis 2	Signaling by Glutamate	sig	non-sig	non-sig	non-sig
CPI-CS034026D0F	Glutamate_byGLS_and_SLC1A2_GRIK1	T cell	MHC 1	Signaling by Glutamate	sig	non-sig	non-sig	non-sig
CPI-CS04473CE2B	Glutamate_byGLS_and_SLC1A3_GRIK1	Homeostasis 1	DAM1	Signaling by Glutamate	sig	non-sig	non-sig	non-sig
CPI-CS04473CE2B	Glutamate_byGLS_and_SLC1A3_GRIK1	Homeostasis 1	Homeostasis 2	Signaling by Glutamate	sig	non-sig	non-sig	non-sig
CPI-CS04473CE2B	Glutamate_byGLS_and_SLC1A3_GRIK1	Homeostasis 1	Inflammation	Signaling by Glutamate	sig	non-sig	non-sig	non-sig
CPI-CS04473CE2B	Glutamate_byGLS_and_SLC1A3_GRIK1	Homeostasis 1	MHC 1	Signaling by Glutamate	sig	non-sig	non-sig	non-sig
CPI-CS04473CE2B	Glutamate_byGLS_and_SLC1A3_GRIK1	Homeostasis 1	Macrophage	Signaling by Glutamate	sig	non-sig	non-sig	non-sig
CPI-CS04473CE2B	Glutamate_byGLS_and_SLC1A3_GRIK1	Homeostasis 1	Monocyte	Signaling by Glutamate	sig	non-sig	non-sig	non-sig
CPI-CS04473CE2B	Glutamate_byGLS_and_SLC1A3_GRIK1	Homeostasis 1	Proliferation	Signaling by Glutamate	sig	non-sig	non-sig	non-sig
CPI-CS04473CE2B	Glutamate_byGLS_and_SLC1A3_GRIK1	Homeostasis 1	Tau Microglia	Signaling by Glutamate	sig	non-sig	non-sig	non-sig
CPI-CS04473CE2B	Glutamate_byGLS_and_SLC1A3_GRIK1	Homeostasis 2	DAM1	Signaling by Glutamate	sig	non-sig	non-sig	non-sig
CPI-CS04473CE2B	Glutamate_byGLS_and_SLC1A3_GRIK1	Homeostasis 2	Homeostasis 2	Signaling by Glutamate	sig	non-sig	non-sig	non-sig
CPI-CS04473CE2B	Glutamate_byGLS_and_SLC1A3_GRIK1	Homeostasis 2	Inflammation	Signaling by Glutamate	sig	non-sig	non-sig	non-sig
CPI-CS04473CE2B	Glutamate_byGLS_and_SLC1A3_GRIK1	Homeostasis 2	MHC 1	Signaling by Glutamate	sig	non-sig	non-sig	non-sig
CPI-CS04473CE2B	Glutamate_byGLS_and_SLC1A3_GRIK1	Homeostasis 2	MHC 2	Signaling by Glutamate	sig	non-sig	non-sig	non-sig
CPI-CS04473CE2B	Glutamate_byGLS_and_SLC1A3_GRIK1	Homeostasis 2	Macrophage	Signaling by Glutamate	sig	non-sig	non-sig	non-sig
CPI-CS04473CE2B	Glutamate_byGLS_and_SLC1A3_GRIK1	Homeostasis 2	Monocyte	Signaling by Glutamate	sig	non-sig	non-sig	non-sig
CPI-CS04473CE2B	Glutamate_byGLS_and_SLC1A3_GRIK1	Homeostasis 2	Proliferation	Signaling by Glutamate	sig	non-sig	non-sig	non-sig
CPI-CS04473CE2B	Glutamate_byGLS_and_SLC1A3_GRIK1	Inflammation	Homeostasis 1	Signaling by Glutamate	sig	non-sig	non-sig	non-sig
CPI-CS04473CE2B	Glutamate_byGLS_and_SLC1A3_GRIK1	MHC 1	Homeostasis 2	Signaling by Glutamate	sig	non-sig	non-sig	non-sig
CPI-CS04473CE2B	Glutamate_byGLS_and_SLC1A3_GRIK1	MHC 1	MHC 1	Signaling by Glutamate	sig	non-sig	non-sig	non-sig
CPI-CS04473CE2B	Glutamate_byGLS_and_SLC1A3_GRIK1	MHC 1	Monocyte	Signaling by Glutamate	sig	non-sig	non-sig	non-sig
CPI-CS04473CE2B	Glutamate_byGLS_and_SLC1A3_GRIK1	Proliferation	Homeostasis 1	Signaling by Glutamate	sig	non-sig	non-sig	non-sig
CPI-CS04473CE2B	Glutamate_byGLS_and_SLC1A3_GRIK1	Proliferation	Proliferation	Signaling by Glutamate	sig	non-sig	non-sig	non-sig
CPI-CC0924D1237	Glutamate_byGLS_and_SLC1A2_Glutamate_Kainate_1_4_complex	DAM1	Homeostasis 1	Signaling by Glutamate	sig	non-sig	non-sig	non-sig
CPI-CC0924D1237	Glutamate_byGLS_and_SLC1A2_Glutamate_Kainate_1_4_complex	DAM1	Inflammation	Signaling by Glutamate	sig	non-sig	non-sig	non-sig
CPI-CC0924D1237	Glutamate_byGLS_and_SLC1A2_Glutamate_Kainate_1_4_complex	DAM1	T cell	Signaling by Glutamate	sig	non-sig	non-sig	non-sig
CPI-CC0924D1237	Glutamate_byGLS_and_SLC1A2_Glutamate_Kainate_1_4_complex	DAM1	Macrophage	Signaling by Glutamate	sig	non-sig	non-sig	non-sig
CPI-CC0924D1237	Glutamate_byGLS_and_SLC1A2_Glutamate_Kainate_1_4_complex	DAM1	Proliferation	Signaling by Glutamate	sig	non-sig	non-sig	non-sig
CPI-CC0924D1237	Glutamate_byGLS_and_SLC1A2_Glutamate_Kainate_1_4_complex	T cell	Homeostasis 2	Signaling by Glutamate	sig	non-sig	non-sig	non-sig
CPI-CC0924D1237	Glutamate_byGLS_and_SLC1A2_Glutamate_Kainate_1_4_complex	T cell	Inflammation	Signaling by Glutamate	sig	non-sig	non-sig	non-sig
CPI-CC0924D1237	Glutamate_byGLS_and_SLC1A2_Glutamate_Kainate_1_4_complex	Macrophage	Homeostasis 2	Signaling by Glutamate	sig	non-sig	non-sig	non-sig
CPI-CC0924D1237	Glutamate_byGLS_and_SLC1A2_Glutamate_Kainate_1_4_complex	Tau Microglia	Homeostasis 2	Signaling by Glutamate	sig	non-sig	non-sig	non-sig
CPI-CC0918CCE56	Glutamate_byGLS_and_SLC1A3_Glutamate_Kainate_1_4_complex	Homeostasis 1	Homeostasis 2	Signaling by Glutamate	sig	non-sig	non-sig	non-sig
CPI-CC0918CCE56	Glutamate_byGLS_and_SLC1A3_Glutamate_Kainate_1_4_complex	Homeostasis 1	Inflammation	Signaling by Glutamate	sig	non-sig	non-sig	non-sig
CPI-CC0918CCE56	Glutamate_byGLS_and_SLC1A3_Glutamate_Kainate_1_4_complex	Homeostasis 1	MHC 2	Signaling by Glutamate	sig	non-sig	non-sig	non-sig
CPI-CC0918CCE56	Glutamate_byGLS_and_SLC1A3_Glutamate_Kainate_1_4_complex	Homeostasis 1	Proliferation	Signaling by Glutamate	sig	non-sig	non-sig	non-sig
CPI-CC0918CCE56	Glutamate_byGLS_and_SLC1A3_Glutamate_Kainate_1_4_complex	Homeostasis 2	DAM1	Signaling by Glutamate	sig	non-sig	non-sig	non-sig
CPI-CC0918CCE56	Glutamate_byGLS_and_SLC1A3_Glutamate_Kainate_1_4_complex	Homeostasis 2	Homeostasis 1	Signaling by Glutamate	sig	non-sig	non-sig	non-sig
CPI-CC0918CCE56	Glutamate_byGLS_and_SLC1A3_Glutamate_Kainate_1_4_complex	Homeostasis 2	Homeostasis 2	Signaling by Glutamate	sig	non-sig	non-sig	non-sig
CPI-CC0918CCE56	Glutamate_byGLS_and_SLC1A3_Glutamate_Kainate_1_4_complex	Homeostasis 2	Inflammation	Signaling by Glutamate	sig	non-sig	non-sig	non-sig
CPI-CC0918CCE56	Glutamate_byGLS_and_SLC1A3_Glutamate_Kainate_1_4_complex	Homeostasis 2	T cell	Signaling by Glutamate	sig	non-sig	non-sig	non-sig
CPI-CC0918CCE56	Glutamate_byGLS_and_SLC1A3_Glutamate_Kainate_1_4_complex	Homeostasis 2	MHC 1	Signaling by Glutamate	sig	non-sig	non-sig	non-sig
CPI-CC0918CCE56	Glutamate_byGLS_and_SLC1A3_Glutamate_Kainate_1_4_complex	Homeostasis 2	MHC 2	Signaling by Glutamate	sig	non-sig	non-sig	non-sig
CPI-CC0918CCE56	Glutamate_byGLS_and_SLC1A3_Glutamate_Kainate_1_4_complex	Homeostasis 2	Macrophage	Signaling by Glutamate	sig	non-sig	non-sig	non-sig
CPI-CC0918CCE56	Glutamate_byGLS_and_SLC1A3_Glutamate_Kainate_1_4_complex	Homeostasis 2	Monocyte	Signaling by Glutamate	sig	non-sig	non-sig	non-sig
CPI-CC0918CCE56	Glutamate_byGLS_and_SLC1A3_Glutamate_Kainate_1_4_complex	Homeostasis 2	Proliferation	Signaling by Glutamate	sig	non-sig	non-sig	non-sig
CPI-CC0918CCE56	Glutamate_byGLS_and_SLC1A3_Glutamate_Kainate_1_4_complex	Homeostasis 2	Tau Microglia	Signaling by Glutamate	sig	non-sig	non-sig	non-sig
CPI-CC0918CCE56	Glutamate_byGLS_and_SLC1A3_Glutamate_Kainate_1_4_complex	MHC 1	Homeostasis 2	Signaling by Glutamate	sig	non-sig	non-sig	non-sig
CPI-CC0918CCE56	Glutamate_byGLS_and_SLC1A3_Glutamate_Kainate_1_4_complex	MHC 1	Inflammation	Signaling by Glutamate	sig	non-sig	non-sig	non-sig
CPI-CC0918CCE56	Glutamate_byGLS_and_SLC1A3_Glutamate_Kainate_1_4_complex	Proliferation	T cell	Signaling by Glutamate	sig	non-sig	non-sig	non-sig
CPI-CC0C78F642C	Glutamate_byGLS_and_SLC1A2_Glutamate_Kainate_1_5_complex	DAM1	Homeostasis 1	Signaling by Glutamate	sig	non-sig	non-sig	non-sig
CPI-CC0C78F642C	Glutamate_byGLS_and_SLC1A2_Glutamate_Kainate_1_5_complex	DAM1	MHC 1	Signaling by Glutamate	sig	non-sig	non-sig	non-sig
CPI-CC0C78F642C	Glutamate_byGLS_and_SLC1A2_Glutamate_Kainate_1_5_complex	DAM1	Proliferation	Signaling by Glutamate	sig	non-sig	non-sig	non-sig
CPI-CC02BF19DCF	Glutamate_byGLS_and_SLC1A3_Glutamate_Kainate_1_5_complex	Homeostasis 1	DAM1	Signaling by Glutamate	sig	non-sig	non-sig	non-sig
CPI-CC02BF19DCF	Glutamate_byGLS_and_SLC1A3_Glutamate_Kainate_1_5_complex	Homeostasis 1	Homeostasis 2	Signaling by Glutamate	sig	non-sig	non-sig	non-sig
CPI-CC02BF19DCF	Glutamate_byGLS_and_SLC1A3_Glutamate_Kainate_1_5_complex	Homeostasis 1	Inflammation	Signaling by Glutamate	sig	non-sig	non-sig	non-sig
CPI-CC02BF19DCF	Glutamate_byGLS_and_SLC1A3_Glutamate_Kainate_1_5_complex	Homeostasis 1	T cell	Signaling by Glutamate	sig	non-sig	non-sig	non-sig
CPI-CC02BF19DCF	Glutamate_byGLS_and_SLC1A3_Glutamate_Kainate_1_5_complex	Homeostasis 1	MHC 2	Signaling by Glutamate	sig	non-sig	non-sig	non-sig
CPI-CC02BF19DCF	Glutamate_byGLS_and_SLC1A3_Glutamate_Kainate_1_5_complex	Homeostasis 1	Macrophage	Signaling by Glutamate	sig	non-sig	non-sig	non-sig
CPI-CC02BF19DCF	Glutamate_byGLS_and_SLC1A3_Glutamate_Kainate_1_5_complex	Homeostasis 1	Monocyte	Signaling by Glutamate	sig	non-sig	non-sig	non-sig
CPI-CC02BF19DCF	Glutamate_byGLS_and_SLC1A3_Glutamate_Kainate_1_5_complex	Homeostasis 1	Tau Microglia	Signaling by Glutamate	sig	non-sig	non-sig	non-sig
CPI-CC02BF19DCF	Glutamate_byGLS_and_SLC1A3_Glutamate_Kainate_1_5_complex	Homeostasis 2	DAM1	Signaling by Glutamate	sig	non-sig	non-sig	non-sig
CPI-CC02BF19DCF	Glutamate_byGLS_and_SLC1A3_Glutamate_Kainate_1_5_complex	Homeostasis 2	Homeostasis 1	Signaling by Glutamate	sig	non-sig	non-sig	non-sig
CPI-CC02BF19DCF	Glutamate_byGLS_and_SLC1A3_Glutamate_Kainate_1_5_complex	Homeostasis 2	Homeostasis 2	Signaling by Glutamate	sig	non-sig	non-sig	non-sig
CPI-CC02BF19DCF	Glutamate_byGLS_and_SLC1A3_Glutamate_Kainate_1_5_complex	Homeostasis 2	Inflammation	Signaling by Glutamate	sig	non-sig	non-sig	non-sig
CPI-CC02BF19DCF	Glutamate_byGLS_and_SLC1A3_Glutamate_Kainate_1_5_complex	Homeostasis 2	T cell	Signaling by Glutamate	sig	non-sig	non-sig	non-sig
CPI-CC02BF19DCF	Glutamate_byGLS_and_SLC1A3_Glutamate_Kainate_1_5_complex	Homeostasis 2	MHC 1	Signaling by Glutamate	sig	non-sig	non-sig	non-sig
CPI-CC02BF19DCF	Glutamate_byGLS_and_SLC1A3_Glutamate_Kainate_1_5_complex	Homeostasis 2	MHC 2	Signaling by Glutamate	sig	non-sig	non-sig	non-sig
CPI-CC02BF19DCF	Glutamate_byGLS_and_SLC1A3_Glutamate_Kainate_1_5_complex	Homeostasis 2	Macrophage	Signaling by Glutamate	sig	non-sig	non-sig	non-sig
CPI-CC02BF19DCF	Glutamate_byGLS_and_SLC1A3_Glutamate_Kainate_1_5_complex	Homeostasis 2	Monocyte	Signaling by Glutamate	sig	non-sig	non-sig	non-sig
CPI-CC02BF19DCF	Glutamate_byGLS_and_SLC1A3_Glutamate_Kainate_1_5_complex	Homeostasis 2	Proliferation	Signaling by Glutamate	sig	non-sig	non-sig	non-sig
CPI-CC02BF19DCF	Glutamate_byGLS_and_SLC1A3_Glutamate_Kainate_1_5_complex	Homeostasis 2	Tau Microglia	Signaling by Glutamate	sig	non-sig	non-sig	non-sig
CPI-CC02BF19DCF	Glutamate_byGLS_and_SLC1A3_Glutamate_Kainate_1_5_complex	Proliferation	Homeostasis 1	Signaling by Glutamate	sig	non-sig	non-sig	non-sig
CPI-CC02BF19DCF	Glutamate_byGLS_and_SLC1A3_Glutamate_Kainate_1_5_complex	Proliferation	Proliferation	Signaling by Glutamate	sig	non-sig	non-sig	non-sig
CPI-CS009D94220	Glutamate_byGLS_and_SLC17A7_GRIK2	DAM1	Homeostasis 1	Signaling by Glutamate	sig	non-sig	non-sig	non-sig
CPI-CS009D94220	Glutamate_byGLS_and_SLC17A7_GRIK2	Homeostasis 1	Monocyte	Signaling by Glutamate	sig	sig	non-sig	non-sig
CPI-CS009D94220	Glutamate_byGLS_and_SLC17A7_GRIK2	Homeostasis 2	Homeostasis 1	Signaling by Glutamate	sig	non-sig	non-sig	non-sig
CPI-CS009D94220	Glutamate_byGLS_and_SLC17A7_GRIK2	MHC 1	Homeostasis 1	Signaling by Glutamate	sig	non-sig	non-sig	non-sig
CPI-CS009D94220	Glutamate_byGLS_and_SLC17A7_GRIK2	MHC 1	Proliferation	Signaling by Glutamate	sig	non-sig	non-sig	non-sig
CPI-CS009D94220	Glutamate_byGLS_and_SLC17A7_GRIK2	MHC 2	Homeostasis 1	Signaling by Glutamate	sig	non-sig	non-sig	non-sig
CPI-CS009D94220	Glutamate_byGLS_and_SLC17A7_GRIK2	Macrophage	Homeostasis 1	Signaling by Glutamate	sig	sig	non-sig	non-sig
CPI-CS009D94220	Glutamate_byGLS_and_SLC17A7_GRIK2	Monocyte	Proliferation	Signaling by Glutamate	sig	non-sig	non-sig	non-sig
CPI-CS009D94220	Glutamate_byGLS_and_SLC17A7_GRIK2	Proliferation	Proliferation	Signaling by Glutamate	sig	non-sig	non-sig	non-sig
CPI-CS009D94220	Glutamate_byGLS_and_SLC17A7_GRIK2	Tau Microglia	Homeostasis 1	Signaling by Glutamate	sig	non-sig	non-sig	non-sig
CPI-CS07D0E4897	Glutamate_byGLS_and_SLC1A1_GRIK2	MHC 2	Homeostasis 1	Signaling by Glutamate	sig	non-sig	non-sig	non-sig
CPI-CS07D0E4897	Glutamate_byGLS_and_SLC1A1_GRIK2	Proliferation	Homeostasis 1	Signaling by Glutamate	sig	sig	non-sig	non-sig
CPI-CS0B15FCB8B	Glutamate_byGLS_and_SLC1A2_GRIK2	DAM1	Proliferation	Signaling by Glutamate	sig	non-sig	non-sig	non-sig
CPI-CS0B15FCB8B	Glutamate_byGLS_and_SLC1A2_GRIK2	Inflammation	Homeostasis 1	Signaling by Glutamate	sig	non-sig	non-sig	non-sig
CPI-CS0B15FCB8B	Glutamate_byGLS_and_SLC1A2_GRIK2	MHC 1	Homeostasis 1	Signaling by Glutamate	sig	non-sig	non-sig	non-sig
CPI-CS0B15FCB8B	Glutamate_byGLS_and_SLC1A2_GRIK2	Macrophage	MHC 1	Signaling by Glutamate	sig	non-sig	non-sig	non-sig
CPI-CS037F4EF32	Glutamate_byGLS_and_SLC1A3_GRIK2	Homeostasis 1	DAM1	Signaling by Glutamate	sig	non-sig	non-sig	non-sig
CPI-CS037F4EF32	Glutamate_byGLS_and_SLC1A3_GRIK2	Homeostasis 1	Homeostasis 2	Signaling by Glutamate	sig	non-sig	non-sig	non-sig
CPI-CS037F4EF32	Glutamate_byGLS_and_SLC1A3_GRIK2	Homeostasis 1	MHC 1	Signaling by Glutamate	sig	non-sig	non-sig	non-sig
CPI-CS037F4EF32	Glutamate_byGLS_and_SLC1A3_GRIK2	Homeostasis 1	Macrophage	Signaling by Glutamate	sig	non-sig	non-sig	non-sig
CPI-CS037F4EF32	Glutamate_byGLS_and_SLC1A3_GRIK2	Homeostasis 1	Monocyte	Signaling by Glutamate	sig	sig	non-sig	non-sig
CPI-CS037F4EF32	Glutamate_byGLS_and_SLC1A3_GRIK2	Homeostasis 2	Homeostasis 2	Signaling by Glutamate	sig	non-sig	non-sig	non-sig
CPI-CS037F4EF32	Glutamate_byGLS_and_SLC1A3_GRIK2	Homeostasis 2	MHC 1	Signaling by Glutamate	sig	non-sig	non-sig	non-sig
CPI-CS037F4EF32	Glutamate_byGLS_and_SLC1A3_GRIK2	Homeostasis 2	Macrophage	Signaling by Glutamate	sig	non-sig	non-sig	non-sig
CPI-CS037F4EF32	Glutamate_byGLS_and_SLC1A3_GRIK2	Homeostasis 2	Monocyte	Signaling by Glutamate	sig	non-sig	non-sig	non-sig
CPI-CS037F4EF32	Glutamate_byGLS_and_SLC1A3_GRIK2	Homeostasis 2	Proliferation	Signaling by Glutamate	sig	non-sig	non-sig	non-sig
CPI-CS037F4EF32	Glutamate_byGLS_and_SLC1A3_GRIK2	MHC 1	MHC 1	Signaling by Glutamate	sig	non-sig	non-sig	non-sig
CPI-CS037F4EF32	Glutamate_byGLS_and_SLC1A3_GRIK2	MHC 1	Monocyte	Signaling by Glutamate	sig	sig	non-sig	non-sig
CPI-CS037F4EF32	Glutamate_byGLS_and_SLC1A3_GRIK2	Proliferation	Homeostasis 1	Signaling by Glutamate	sig	non-sig	non-sig	non-sig
CPI-CS037F4EF32	Glutamate_byGLS_and_SLC1A3_GRIK2	Proliferation	Proliferation	Signaling by Glutamate	sig	non-sig	non-sig	non-sig
CPI-CC0D02A5FE5	Glutamate_byGLS_and_SLC1A2_Glutamate_Kainate_2_4_complex	DAM1	Homeostasis 1	Signaling by Glutamate	sig	non-sig	non-sig	non-sig
CPI-CC0D02A5FE5	Glutamate_byGLS_and_SLC1A2_Glutamate_Kainate_2_4_complex	DAM1	Inflammation	Signaling by Glutamate	sig	non-sig	non-sig	non-sig
CPI-CC0D02A5FE5	Glutamate_byGLS_and_SLC1A2_Glutamate_Kainate_2_4_complex	DAM1	Macrophage	Signaling by Glutamate	sig	non-sig	non-sig	non-sig
CPI-CC0D02A5FE5	Glutamate_byGLS_and_SLC1A2_Glutamate_Kainate_2_4_complex	DAM1	Proliferation	Signaling by Glutamate	sig	non-sig	non-sig	non-sig
CPI-CC0D02A5FE5	Glutamate_byGLS_and_SLC1A2_Glutamate_Kainate_2_4_complex	T cell	Homeostasis 2	Signaling by Glutamate	sig	non-sig	non-sig	non-sig
CPI-CC0D02A5FE5	Glutamate_byGLS_and_SLC1A2_Glutamate_Kainate_2_4_complex	T cell	Inflammation	Signaling by Glutamate	sig	non-sig	non-sig	non-sig
CPI-CC0D02A5FE5	Glutamate_byGLS_and_SLC1A2_Glutamate_Kainate_2_4_complex	Macrophage	Homeostasis 2	Signaling by Glutamate	sig	non-sig	non-sig	non-sig
CPI-CC0D02A5FE5	Glutamate_byGLS_and_SLC1A2_Glutamate_Kainate_2_4_complex	Tau Microglia	Homeostasis 2	Signaling by Glutamate	sig	non-sig	non-sig	non-sig
CPI-CC0063E25BD	Glutamate_byGLS_and_SLC1A3_Glutamate_Kainate_2_4_complex	Homeostasis 1	Homeostasis 2	Signaling by Glutamate	sig	non-sig	non-sig	non-sig
CPI-CC0063E25BD	Glutamate_byGLS_and_SLC1A3_Glutamate_Kainate_2_4_complex	Homeostasis 1	Inflammation	Signaling by Glutamate	sig	non-sig	non-sig	non-sig
CPI-CC0063E25BD	Glutamate_byGLS_and_SLC1A3_Glutamate_Kainate_2_4_complex	Homeostasis 1	MHC 2	Signaling by Glutamate	sig	non-sig	non-sig	non-sig
CPI-CC0063E25BD	Glutamate_byGLS_and_SLC1A3_Glutamate_Kainate_2_4_complex	Homeostasis 1	Proliferation	Signaling by Glutamate	sig	non-sig	non-sig	non-sig
CPI-CC0063E25BD	Glutamate_byGLS_and_SLC1A3_Glutamate_Kainate_2_4_complex	Homeostasis 2	DAM1	Signaling by Glutamate	sig	non-sig	non-sig	non-sig
CPI-CC0063E25BD	Glutamate_byGLS_and_SLC1A3_Glutamate_Kainate_2_4_complex	Homeostasis 2	Homeostasis 1	Signaling by Glutamate	sig	non-sig	non-sig	non-sig
CPI-CC0063E25BD	Glutamate_byGLS_and_SLC1A3_Glutamate_Kainate_2_4_complex	Homeostasis 2	Homeostasis 2	Signaling by Glutamate	sig	non-sig	non-sig	non-sig
CPI-CC0063E25BD	Glutamate_byGLS_and_SLC1A3_Glutamate_Kainate_2_4_complex	Homeostasis 2	Inflammation	Signaling by Glutamate	sig	non-sig	non-sig	non-sig
CPI-CC0063E25BD	Glutamate_byGLS_and_SLC1A3_Glutamate_Kainate_2_4_complex	Homeostasis 2	MHC 1	Signaling by Glutamate	sig	non-sig	non-sig	non-sig
CPI-CC0063E25BD	Glutamate_byGLS_and_SLC1A3_Glutamate_Kainate_2_4_complex	Homeostasis 2	MHC 2	Signaling by Glutamate	sig	non-sig	non-sig	non-sig
CPI-CC0063E25BD	Glutamate_byGLS_and_SLC1A3_Glutamate_Kainate_2_4_complex	Homeostasis 2	Macrophage	Signaling by Glutamate	sig	non-sig	non-sig	non-sig
CPI-CC0063E25BD	Glutamate_byGLS_and_SLC1A3_Glutamate_Kainate_2_4_complex	Homeostasis 2	Monocyte	Signaling by Glutamate	sig	non-sig	non-sig	non-sig
CPI-CC0063E25BD	Glutamate_byGLS_and_SLC1A3_Glutamate_Kainate_2_4_complex	Homeostasis 2	Proliferation	Signaling by Glutamate	sig	non-sig	non-sig	non-sig
CPI-CC0063E25BD	Glutamate_byGLS_and_SLC1A3_Glutamate_Kainate_2_4_complex	Homeostasis 2	Tau Microglia	Signaling by Glutamate	sig	non-sig	non-sig	non-sig
CPI-CC0063E25BD	Glutamate_byGLS_and_SLC1A3_Glutamate_Kainate_2_4_complex	MHC 1	Homeostasis 2	Signaling by Glutamate	sig	non-sig	non-sig	non-sig
CPI-CC0063E25BD	Glutamate_byGLS_and_SLC1A3_Glutamate_Kainate_2_4_complex	MHC 1	Inflammation	Signaling by Glutamate	sig	non-sig	non-sig	non-sig
CPI-CC0063E25BD	Glutamate_byGLS_and_SLC1A3_Glutamate_Kainate_2_4_complex	Proliferation	T cell	Signaling by Glutamate	sig	non-sig	non-sig	non-sig
CPI-CC033AC2E73	Glutamate_byGLS_and_SLC1A2_Glutamate_Kainate_2_5_complex	DAM1	Homeostasis 1	Signaling by Glutamate	sig	non-sig	non-sig	non-sig
CPI-CC033AC2E73	Glutamate_byGLS_and_SLC1A2_Glutamate_Kainate_2_5_complex	DAM1	MHC 1	Signaling by Glutamate	sig	non-sig	non-sig	non-sig
CPI-CC033AC2E73	Glutamate_byGLS_and_SLC1A2_Glutamate_Kainate_2_5_complex	DAM1	Proliferation	Signaling by Glutamate	sig	non-sig	non-sig	non-sig
CPI-CC0E60351FF	Glutamate_byGLS_and_SLC1A3_Glutamate_Kainate_2_5_complex	Homeostasis 1	DAM1	Signaling by Glutamate	sig	non-sig	non-sig	non-sig
CPI-CC0E60351FF	Glutamate_byGLS_and_SLC1A3_Glutamate_Kainate_2_5_complex	Homeostasis 1	Homeostasis 2	Signaling by Glutamate	sig	non-sig	non-sig	non-sig
CPI-CC0E60351FF	Glutamate_byGLS_and_SLC1A3_Glutamate_Kainate_2_5_complex	Homeostasis 1	Inflammation	Signaling by Glutamate	sig	non-sig	non-sig	non-sig
CPI-CC0E60351FF	Glutamate_byGLS_and_SLC1A3_Glutamate_Kainate_2_5_complex	Homeostasis 1	T cell	Signaling by Glutamate	sig	non-sig	non-sig	non-sig
CPI-CC0E60351FF	Glutamate_byGLS_and_SLC1A3_Glutamate_Kainate_2_5_complex	Homeostasis 1	MHC 2	Signaling by Glutamate	sig	non-sig	non-sig	non-sig
CPI-CC0E60351FF	Glutamate_byGLS_and_SLC1A3_Glutamate_Kainate_2_5_complex	Homeostasis 1	Macrophage	Signaling by Glutamate	sig	non-sig	non-sig	non-sig
CPI-CC0E60351FF	Glutamate_byGLS_and_SLC1A3_Glutamate_Kainate_2_5_complex	Homeostasis 1	Monocyte	Signaling by Glutamate	sig	non-sig	non-sig	non-sig
CPI-CC0E60351FF	Glutamate_byGLS_and_SLC1A3_Glutamate_Kainate_2_5_complex	Homeostasis 1	Tau Microglia	Signaling by Glutamate	sig	non-sig	non-sig	non-sig
CPI-CC0E60351FF	Glutamate_byGLS_and_SLC1A3_Glutamate_Kainate_2_5_complex	Homeostasis 2	DAM1	Signaling by Glutamate	sig	non-sig	non-sig	non-sig
CPI-CC0E60351FF	Glutamate_byGLS_and_SLC1A3_Glutamate_Kainate_2_5_complex	Homeostasis 2	Homeostasis 1	Signaling by Glutamate	sig	non-sig	non-sig	non-sig
CPI-CC0E60351FF	Glutamate_byGLS_and_SLC1A3_Glutamate_Kainate_2_5_complex	Homeostasis 2	Homeostasis 2	Signaling by Glutamate	sig	non-sig	non-sig	non-sig
CPI-CC0E60351FF	Glutamate_byGLS_and_SLC1A3_Glutamate_Kainate_2_5_complex	Homeostasis 2	Inflammation	Signaling by Glutamate	sig	non-sig	non-sig	non-sig
CPI-CC0E60351FF	Glutamate_byGLS_and_SLC1A3_Glutamate_Kainate_2_5_complex	Homeostasis 2	T cell	Signaling by Glutamate	sig	non-sig	non-sig	non-sig
CPI-CC0E60351FF	Glutamate_byGLS_and_SLC1A3_Glutamate_Kainate_2_5_complex	Homeostasis 2	MHC 1	Signaling by Glutamate	sig	non-sig	non-sig	non-sig
CPI-CC0E60351FF	Glutamate_byGLS_and_SLC1A3_Glutamate_Kainate_2_5_complex	Homeostasis 2	MHC 2	Signaling by Glutamate	sig	non-sig	non-sig	non-sig
CPI-CC0E60351FF	Glutamate_byGLS_and_SLC1A3_Glutamate_Kainate_2_5_complex	Homeostasis 2	Macrophage	Signaling by Glutamate	sig	non-sig	non-sig	non-sig
CPI-CC0E60351FF	Glutamate_byGLS_and_SLC1A3_Glutamate_Kainate_2_5_complex	Homeostasis 2	Monocyte	Signaling by Glutamate	sig	non-sig	non-sig	non-sig
CPI-CC0E60351FF	Glutamate_byGLS_and_SLC1A3_Glutamate_Kainate_2_5_complex	Homeostasis 2	Proliferation	Signaling by Glutamate	sig	non-sig	non-sig	non-sig
CPI-CC0E60351FF	Glutamate_byGLS_and_SLC1A3_Glutamate_Kainate_2_5_complex	Homeostasis 2	Tau Microglia	Signaling by Glutamate	sig	non-sig	non-sig	non-sig
CPI-CC0E60351FF	Glutamate_byGLS_and_SLC1A3_Glutamate_Kainate_2_5_complex	Proliferation	Homeostasis 1	Signaling by Glutamate	sig	non-sig	non-sig	non-sig
CPI-CC0E60351FF	Glutamate_byGLS_and_SLC1A3_Glutamate_Kainate_2_5_complex	Proliferation	Proliferation	Signaling by Glutamate	sig	non-sig	non-sig	non-sig
CPI-CS0A00FD94B	Glutamate_byGLS_and_SLC1A2_GRIK3	DAM1	Homeostasis 1	Signaling by Glutamate	sig	non-sig	non-sig	non-sig
CPI-CS0A00FD94B	Glutamate_byGLS_and_SLC1A2_GRIK3	DAM1	MHC 1	Signaling by Glutamate	sig	non-sig	non-sig	non-sig
CPI-CS0A00FD94B	Glutamate_byGLS_and_SLC1A2_GRIK3	DAM1	Monocyte	Signaling by Glutamate	sig	non-sig	non-sig	non-sig
CPI-CS0A00FD94B	Glutamate_byGLS_and_SLC1A2_GRIK3	DAM1	Proliferation	Signaling by Glutamate	sig	non-sig	non-sig	non-sig
CPI-CS0A00FD94B	Glutamate_byGLS_and_SLC1A2_GRIK3	T cell	Homeostasis 1	Signaling by Glutamate	sig	non-sig	non-sig	non-sig
CPI-CS0A00FD94B	Glutamate_byGLS_and_SLC1A2_GRIK3	T cell	MHC 1	Signaling by Glutamate	sig	non-sig	non-sig	non-sig
CPI-CS0A00FD94B	Glutamate_byGLS_and_SLC1A2_GRIK3	T cell	Monocyte	Signaling by Glutamate	sig	non-sig	non-sig	non-sig
CPI-CS0A00FD94B	Glutamate_byGLS_and_SLC1A2_GRIK3	T cell	Proliferation	Signaling by Glutamate	sig	non-sig	non-sig	non-sig
CPI-CS0A00FD94B	Glutamate_byGLS_and_SLC1A2_GRIK3	Macrophage	Homeostasis 1	Signaling by Glutamate	sig	non-sig	non-sig	non-sig
CPI-CS0A00FD94B	Glutamate_byGLS_and_SLC1A2_GRIK3	Macrophage	MHC 1	Signaling by Glutamate	sig	non-sig	non-sig	non-sig
CPI-CS0A00FD94B	Glutamate_byGLS_and_SLC1A2_GRIK3	Macrophage	Monocyte	Signaling by Glutamate	sig	non-sig	non-sig	non-sig
CPI-CS0A00FD94B	Glutamate_byGLS_and_SLC1A2_GRIK3	Macrophage	Proliferation	Signaling by Glutamate	sig	non-sig	non-sig	non-sig
CPI-CS0A00FD94B	Glutamate_byGLS_and_SLC1A2_GRIK3	Tau Microglia	Homeostasis 1	Signaling by Glutamate	sig	non-sig	non-sig	non-sig
CPI-CS0A00FD94B	Glutamate_byGLS_and_SLC1A2_GRIK3	Tau Microglia	MHC 1	Signaling by Glutamate	sig	non-sig	non-sig	non-sig
CPI-CS0A00FD94B	Glutamate_byGLS_and_SLC1A2_GRIK3	Tau Microglia	Monocyte	Signaling by Glutamate	sig	non-sig	non-sig	non-sig
CPI-CS0A00FD94B	Glutamate_byGLS_and_SLC1A2_GRIK3	Tau Microglia	Proliferation	Signaling by Glutamate	sig	non-sig	non-sig	non-sig
CPI-CS0EB60A2B2	Glutamate_byGLS_and_SLC1A3_GRIK3	Homeostasis 1	Monocyte	Signaling by Glutamate	sig	non-sig	non-sig	non-sig
CPI-CS0EB60A2B2	Glutamate_byGLS_and_SLC1A3_GRIK3	Homeostasis 2	Homeostasis 1	Signaling by Glutamate	sig	non-sig	non-sig	non-sig
CPI-CS0EB60A2B2	Glutamate_byGLS_and_SLC1A3_GRIK3	Homeostasis 2	MHC 1	Signaling by Glutamate	sig	non-sig	non-sig	non-sig
CPI-CS0EB60A2B2	Glutamate_byGLS_and_SLC1A3_GRIK3	Homeostasis 2	MHC 2	Signaling by Glutamate	sig	non-sig	non-sig	non-sig
CPI-CS0EB60A2B2	Glutamate_byGLS_and_SLC1A3_GRIK3	Homeostasis 2	Monocyte	Signaling by Glutamate	sig	non-sig	non-sig	non-sig
CPI-CS0EB60A2B2	Glutamate_byGLS_and_SLC1A3_GRIK3	Homeostasis 2	Proliferation	Signaling by Glutamate	sig	non-sig	non-sig	non-sig
CPI-CS0EB60A2B2	Glutamate_byGLS_and_SLC1A3_GRIK3	MHC 1	Homeostasis 1	Signaling by Glutamate	sig	sig	non-sig	non-sig
CPI-CS0EB60A2B2	Glutamate_byGLS_and_SLC1A3_GRIK3	MHC 1	MHC 1	Signaling by Glutamate	sig	non-sig	non-sig	non-sig
CPI-CS0EB60A2B2	Glutamate_byGLS_and_SLC1A3_GRIK3	MHC 1	Monocyte	Signaling by Glutamate	sig	non-sig	non-sig	non-sig
CPI-CS0EB60A2B2	Glutamate_byGLS_and_SLC1A3_GRIK3	MHC 1	Proliferation	Signaling by Glutamate	sig	sig	non-sig	non-sig
CPI-CS0EB60A2B2	Glutamate_byGLS_and_SLC1A3_GRIK3	Proliferation	Homeostasis 1	Signaling by Glutamate	sig	non-sig	non-sig	non-sig
CPI-CS0EB60A2B2	Glutamate_byGLS_and_SLC1A3_GRIK3	Proliferation	MHC 2	Signaling by Glutamate	sig	non-sig	non-sig	non-sig
CPI-CS0EB60A2B2	Glutamate_byGLS_and_SLC1A3_GRIK3	Proliferation	Monocyte	Signaling by Glutamate	sig	non-sig	non-sig	non-sig
CPI-CS0EB60A2B2	Glutamate_byGLS_and_SLC1A3_GRIK3	Proliferation	Proliferation	Signaling by Glutamate	sig	non-sig	non-sig	non-sig
CPI-CC0CA804C89	Glutamate_byGLS_and_SLC1A2_Glutamate_Kainate_3_4_complex	DAM1	Homeostasis 1	Signaling by Glutamate	sig	non-sig	non-sig	non-sig
CPI-CC0CA804C89	Glutamate_byGLS_and_SLC1A2_Glutamate_Kainate_3_4_complex	DAM1	MHC 1	Signaling by Glutamate	sig	non-sig	non-sig	non-sig
CPI-CC0CA804C89	Glutamate_byGLS_and_SLC1A2_Glutamate_Kainate_3_4_complex	DAM1	Monocyte	Signaling by Glutamate	sig	non-sig	non-sig	non-sig
CPI-CC0CA804C89	Glutamate_byGLS_and_SLC1A2_Glutamate_Kainate_3_4_complex	DAM1	Proliferation	Signaling by Glutamate	sig	non-sig	non-sig	non-sig
CPI-CC0CA804C89	Glutamate_byGLS_and_SLC1A2_Glutamate_Kainate_3_4_complex	T cell	Homeostasis 1	Signaling by Glutamate	sig	non-sig	non-sig	non-sig
CPI-CC0CA804C89	Glutamate_byGLS_and_SLC1A2_Glutamate_Kainate_3_4_complex	T cell	MHC 1	Signaling by Glutamate	sig	non-sig	non-sig	non-sig
CPI-CC0CA804C89	Glutamate_byGLS_and_SLC1A2_Glutamate_Kainate_3_4_complex	T cell	Monocyte	Signaling by Glutamate	sig	non-sig	non-sig	non-sig
CPI-CC0CA804C89	Glutamate_byGLS_and_SLC1A2_Glutamate_Kainate_3_4_complex	T cell	Proliferation	Signaling by Glutamate	sig	non-sig	non-sig	non-sig
CPI-CC0CA804C89	Glutamate_byGLS_and_SLC1A2_Glutamate_Kainate_3_4_complex	Macrophage	Homeostasis 1	Signaling by Glutamate	sig	non-sig	non-sig	non-sig
CPI-CC0CA804C89	Glutamate_byGLS_and_SLC1A2_Glutamate_Kainate_3_4_complex	Macrophage	MHC 1	Signaling by Glutamate	sig	non-sig	non-sig	non-sig
CPI-CC0CA804C89	Glutamate_byGLS_and_SLC1A2_Glutamate_Kainate_3_4_complex	Macrophage	Monocyte	Signaling by Glutamate	sig	non-sig	non-sig	non-sig
CPI-CC0CA804C89	Glutamate_byGLS_and_SLC1A2_Glutamate_Kainate_3_4_complex	Macrophage	Proliferation	Signaling by Glutamate	sig	non-sig	non-sig	non-sig
CPI-CC0CA804C89	Glutamate_byGLS_and_SLC1A2_Glutamate_Kainate_3_4_complex	Tau Microglia	Homeostasis 1	Signaling by Glutamate	sig	non-sig	non-sig	non-sig
CPI-CC0CA804C89	Glutamate_byGLS_and_SLC1A2_Glutamate_Kainate_3_4_complex	Tau Microglia	MHC 1	Signaling by Glutamate	sig	non-sig	non-sig	non-sig
CPI-CC0CA804C89	Glutamate_byGLS_and_SLC1A2_Glutamate_Kainate_3_4_complex	Tau Microglia	Monocyte	Signaling by Glutamate	sig	non-sig	non-sig	non-sig
CPI-CC0CA804C89	Glutamate_byGLS_and_SLC1A2_Glutamate_Kainate_3_4_complex	Tau Microglia	Proliferation	Signaling by Glutamate	sig	non-sig	non-sig	non-sig
CPI-CC049F2ABCF	Glutamate_byGLS_and_SLC1A3_Glutamate_Kainate_3_4_complex	Homeostasis 2	Homeostasis 1	Signaling by Glutamate	sig	non-sig	non-sig	non-sig
CPI-CC049F2ABCF	Glutamate_byGLS_and_SLC1A3_Glutamate_Kainate_3_4_complex	Homeostasis 2	MHC 1	Signaling by Glutamate	sig	non-sig	non-sig	non-sig
CPI-CC049F2ABCF	Glutamate_byGLS_and_SLC1A3_Glutamate_Kainate_3_4_complex	Homeostasis 2	MHC 2	Signaling by Glutamate	sig	non-sig	non-sig	non-sig
CPI-CC049F2ABCF	Glutamate_byGLS_and_SLC1A3_Glutamate_Kainate_3_4_complex	Homeostasis 2	Monocyte	Signaling by Glutamate	sig	non-sig	non-sig	non-sig
CPI-CC049F2ABCF	Glutamate_byGLS_and_SLC1A3_Glutamate_Kainate_3_4_complex	Homeostasis 2	Proliferation	Signaling by Glutamate	sig	non-sig	non-sig	non-sig
CPI-CC049F2ABCF	Glutamate_byGLS_and_SLC1A3_Glutamate_Kainate_3_4_complex	MHC 1	Homeostasis 1	Signaling by Glutamate	sig	sig	non-sig	non-sig
CPI-CC049F2ABCF	Glutamate_byGLS_and_SLC1A3_Glutamate_Kainate_3_4_complex	MHC 1	MHC 1	Signaling by Glutamate	sig	non-sig	non-sig	non-sig
CPI-CC049F2ABCF	Glutamate_byGLS_and_SLC1A3_Glutamate_Kainate_3_4_complex	MHC 1	Monocyte	Signaling by Glutamate	sig	non-sig	non-sig	non-sig
CPI-CC049F2ABCF	Glutamate_byGLS_and_SLC1A3_Glutamate_Kainate_3_4_complex	MHC 1	Proliferation	Signaling by Glutamate	sig	sig	non-sig	non-sig
CPI-CC049F2ABCF	Glutamate_byGLS_and_SLC1A3_Glutamate_Kainate_3_4_complex	Proliferation	Homeostasis 1	Signaling by Glutamate	sig	non-sig	non-sig	non-sig
CPI-CC049F2ABCF	Glutamate_byGLS_and_SLC1A3_Glutamate_Kainate_3_4_complex	Proliferation	Monocyte	Signaling by Glutamate	sig	non-sig	non-sig	non-sig
CPI-CC049F2ABCF	Glutamate_byGLS_and_SLC1A3_Glutamate_Kainate_3_4_complex	Proliferation	Proliferation	Signaling by Glutamate	sig	non-sig	non-sig	non-sig
CPI-CC03E04AA64	Glutamate_byGLS_and_SLC1A2_Glutamate_Kainate_3_5_complex	DAM1	Homeostasis 1	Signaling by Glutamate	sig	non-sig	non-sig	non-sig
CPI-CC03E04AA64	Glutamate_byGLS_and_SLC1A2_Glutamate_Kainate_3_5_complex	DAM1	MHC 1	Signaling by Glutamate	sig	non-sig	non-sig	non-sig
CPI-CC03E04AA64	Glutamate_byGLS_and_SLC1A2_Glutamate_Kainate_3_5_complex	DAM1	Monocyte	Signaling by Glutamate	sig	non-sig	non-sig	non-sig
CPI-CC03E04AA64	Glutamate_byGLS_and_SLC1A2_Glutamate_Kainate_3_5_complex	DAM1	Proliferation	Signaling by Glutamate	sig	non-sig	non-sig	non-sig
CPI-CC03E04AA64	Glutamate_byGLS_and_SLC1A2_Glutamate_Kainate_3_5_complex	T cell	Homeostasis 1	Signaling by Glutamate	sig	non-sig	non-sig	non-sig
CPI-CC03E04AA64	Glutamate_byGLS_and_SLC1A2_Glutamate_Kainate_3_5_complex	T cell	MHC 1	Signaling by Glutamate	sig	non-sig	non-sig	non-sig
CPI-CC03E04AA64	Glutamate_byGLS_and_SLC1A2_Glutamate_Kainate_3_5_complex	T cell	Monocyte	Signaling by Glutamate	sig	non-sig	non-sig	non-sig
CPI-CC03E04AA64	Glutamate_byGLS_and_SLC1A2_Glutamate_Kainate_3_5_complex	T cell	Proliferation	Signaling by Glutamate	sig	non-sig	non-sig	non-sig
CPI-CC03E04AA64	Glutamate_byGLS_and_SLC1A2_Glutamate_Kainate_3_5_complex	Macrophage	Homeostasis 1	Signaling by Glutamate	sig	non-sig	non-sig	non-sig
CPI-CC03E04AA64	Glutamate_byGLS_and_SLC1A2_Glutamate_Kainate_3_5_complex	Macrophage	MHC 1	Signaling by Glutamate	sig	non-sig	non-sig	non-sig
CPI-CC03E04AA64	Glutamate_byGLS_and_SLC1A2_Glutamate_Kainate_3_5_complex	Macrophage	Monocyte	Signaling by Glutamate	sig	non-sig	non-sig	non-sig
CPI-CC03E04AA64	Glutamate_byGLS_and_SLC1A2_Glutamate_Kainate_3_5_complex	Macrophage	Proliferation	Signaling by Glutamate	sig	non-sig	non-sig	non-sig
CPI-CC03E04AA64	Glutamate_byGLS_and_SLC1A2_Glutamate_Kainate_3_5_complex	Tau Microglia	Homeostasis 1	Signaling by Glutamate	sig	non-sig	non-sig	non-sig
CPI-CC03E04AA64	Glutamate_byGLS_and_SLC1A2_Glutamate_Kainate_3_5_complex	Tau Microglia	MHC 1	Signaling by Glutamate	sig	non-sig	non-sig	non-sig
CPI-CC03E04AA64	Glutamate_byGLS_and_SLC1A2_Glutamate_Kainate_3_5_complex	Tau Microglia	Monocyte	Signaling by Glutamate	sig	non-sig	non-sig	non-sig
CPI-CC03E04AA64	Glutamate_byGLS_and_SLC1A2_Glutamate_Kainate_3_5_complex	Tau Microglia	Proliferation	Signaling by Glutamate	sig	non-sig	non-sig	non-sig
CPI-CC0CB231C91	Glutamate_byGLS_and_SLC1A3_Glutamate_Kainate_3_5_complex	Homeostasis 1	Monocyte	Signaling by Glutamate	sig	non-sig	non-sig	non-sig
CPI-CC0CB231C91	Glutamate_byGLS_and_SLC1A3_Glutamate_Kainate_3_5_complex	Homeostasis 2	Homeostasis 1	Signaling by Glutamate	sig	non-sig	non-sig	non-sig
CPI-CC0CB231C91	Glutamate_byGLS_and_SLC1A3_Glutamate_Kainate_3_5_complex	Homeostasis 2	MHC 1	Signaling by Glutamate	sig	non-sig	non-sig	non-sig
CPI-CC0CB231C91	Glutamate_byGLS_and_SLC1A3_Glutamate_Kainate_3_5_complex	Homeostasis 2	MHC 2	Signaling by Glutamate	sig	non-sig	non-sig	non-sig
CPI-CC0CB231C91	Glutamate_byGLS_and_SLC1A3_Glutamate_Kainate_3_5_complex	Homeostasis 2	Monocyte	Signaling by Glutamate	sig	non-sig	non-sig	non-sig
CPI-CC0CB231C91	Glutamate_byGLS_and_SLC1A3_Glutamate_Kainate_3_5_complex	Homeostasis 2	Proliferation	Signaling by Glutamate	sig	non-sig	non-sig	non-sig
CPI-CC0CB231C91	Glutamate_byGLS_and_SLC1A3_Glutamate_Kainate_3_5_complex	MHC 1	Homeostasis 1	Signaling by Glutamate	sig	sig	non-sig	non-sig
CPI-CC0CB231C91	Glutamate_byGLS_and_SLC1A3_Glutamate_Kainate_3_5_complex	MHC 1	MHC 1	Signaling by Glutamate	sig	non-sig	non-sig	non-sig
CPI-CC0CB231C91	Glutamate_byGLS_and_SLC1A3_Glutamate_Kainate_3_5_complex	MHC 1	Monocyte	Signaling by Glutamate	sig	non-sig	non-sig	non-sig
CPI-CC0CB231C91	Glutamate_byGLS_and_SLC1A3_Glutamate_Kainate_3_5_complex	MHC 1	Proliferation	Signaling by Glutamate	sig	sig	non-sig	non-sig
CPI-CC0CB231C91	Glutamate_byGLS_and_SLC1A3_Glutamate_Kainate_3_5_complex	Proliferation	Homeostasis 1	Signaling by Glutamate	sig	non-sig	non-sig	non-sig
CPI-CC0CB231C91	Glutamate_byGLS_and_SLC1A3_Glutamate_Kainate_3_5_complex	Proliferation	MHC 2	Signaling by Glutamate	sig	non-sig	non-sig	non-sig
CPI-CC0CB231C91	Glutamate_byGLS_and_SLC1A3_Glutamate_Kainate_3_5_complex	Proliferation	Monocyte	Signaling by Glutamate	sig	non-sig	non-sig	non-sig
CPI-CC0CB231C91	Glutamate_byGLS_and_SLC1A3_Glutamate_Kainate_3_5_complex	Proliferation	Proliferation	Signaling by Glutamate	sig	non-sig	non-sig	non-sig
CPI-CC0456B9A93	Glutamate_byGLS_and_SLC17A7_Glutamate_NMDA_1_2A_complex	Homeostasis 1	Proliferation	Signaling by Glutamate	sig	sig	non-sig	non-sig
CPI-CC0456B9A93	Glutamate_byGLS_and_SLC17A7_Glutamate_NMDA_1_2A_complex	Proliferation	Homeostasis 1	Signaling by Glutamate	sig	non-sig	non-sig	non-sig
CPI-CC0AC4592F2	Glutamate_byGLS_and_SLC1A2_Glutamate_NMDA_1_2A_complex	DAM1	Proliferation	Signaling by Glutamate	sig	non-sig	non-sig	non-sig
CPI-CC0AC4592F2	Glutamate_byGLS_and_SLC1A2_Glutamate_NMDA_1_2A_complex	T cell	MHC 1	Signaling by Glutamate	sig	non-sig	non-sig	non-sig
CPI-CC06CC71FC3	Glutamate_byGLS_and_SLC1A3_Glutamate_NMDA_1_2A_complex	Homeostasis 1	DAM1	Signaling by Glutamate	sig	non-sig	non-sig	non-sig
CPI-CC06CC71FC3	Glutamate_byGLS_and_SLC1A3_Glutamate_NMDA_1_2A_complex	Homeostasis 1	Homeostasis 2	Signaling by Glutamate	sig	non-sig	non-sig	non-sig
CPI-CC06CC71FC3	Glutamate_byGLS_and_SLC1A3_Glutamate_NMDA_1_2A_complex	Homeostasis 1	T cell	Signaling by Glutamate	sig	non-sig	non-sig	non-sig
CPI-CC06CC71FC3	Glutamate_byGLS_and_SLC1A3_Glutamate_NMDA_1_2A_complex	Homeostasis 1	MHC 1	Signaling by Glutamate	sig	non-sig	non-sig	non-sig
CPI-CC06CC71FC3	Glutamate_byGLS_and_SLC1A3_Glutamate_NMDA_1_2A_complex	Homeostasis 1	MHC 2	Signaling by Glutamate	sig	non-sig	non-sig	non-sig
CPI-CC06CC71FC3	Glutamate_byGLS_and_SLC1A3_Glutamate_NMDA_1_2A_complex	Homeostasis 1	Macrophage	Signaling by Glutamate	sig	non-sig	non-sig	non-sig
CPI-CC06CC71FC3	Glutamate_byGLS_and_SLC1A3_Glutamate_NMDA_1_2A_complex	Homeostasis 1	Monocyte	Signaling by Glutamate	sig	sig	non-sig	non-sig
CPI-CC06CC71FC3	Glutamate_byGLS_and_SLC1A3_Glutamate_NMDA_1_2A_complex	Homeostasis 1	Tau Microglia	Signaling by Glutamate	sig	non-sig	non-sig	non-sig
CPI-CC06CC71FC3	Glutamate_byGLS_and_SLC1A3_Glutamate_NMDA_1_2A_complex	Homeostasis 2	DAM1	Signaling by Glutamate	sig	non-sig	non-sig	non-sig
CPI-CC06CC71FC3	Glutamate_byGLS_and_SLC1A3_Glutamate_NMDA_1_2A_complex	Homeostasis 2	Homeostasis 2	Signaling by Glutamate	sig	non-sig	non-sig	non-sig
CPI-CC06CC71FC3	Glutamate_byGLS_and_SLC1A3_Glutamate_NMDA_1_2A_complex	Homeostasis 2	MHC 1	Signaling by Glutamate	sig	non-sig	non-sig	non-sig
CPI-CC06CC71FC3	Glutamate_byGLS_and_SLC1A3_Glutamate_NMDA_1_2A_complex	Homeostasis 2	MHC 2	Signaling by Glutamate	sig	non-sig	non-sig	non-sig
CPI-CC06CC71FC3	Glutamate_byGLS_and_SLC1A3_Glutamate_NMDA_1_2A_complex	Homeostasis 2	Macrophage	Signaling by Glutamate	sig	non-sig	non-sig	non-sig
CPI-CC06CC71FC3	Glutamate_byGLS_and_SLC1A3_Glutamate_NMDA_1_2A_complex	Homeostasis 2	Monocyte	Signaling by Glutamate	sig	non-sig	non-sig	non-sig
CPI-CC06CC71FC3	Glutamate_byGLS_and_SLC1A3_Glutamate_NMDA_1_2A_complex	Homeostasis 2	Proliferation	Signaling by Glutamate	sig	non-sig	non-sig	non-sig
CPI-CC06CC71FC3	Glutamate_byGLS_and_SLC1A3_Glutamate_NMDA_1_2A_complex	MHC 1	MHC 1	Signaling by Glutamate	sig	non-sig	non-sig	non-sig
CPI-CC06CC71FC3	Glutamate_byGLS_and_SLC1A3_Glutamate_NMDA_1_2A_complex	Proliferation	Homeostasis 1	Signaling by Glutamate	sig	non-sig	non-sig	non-sig
CPI-CC06CC71FC3	Glutamate_byGLS_and_SLC1A3_Glutamate_NMDA_1_2A_complex	Proliferation	Proliferation	Signaling by Glutamate	sig	non-sig	non-sig	non-sig
CPI-CC0DCE246DF	Glutamate_byGLS_and_SLC1A2_Glutamate_NMDA_1_2B_complex	DAM1	Homeostasis 1	Signaling by Glutamate	sig	non-sig	non-sig	non-sig
CPI-CC0DCE246DF	Glutamate_byGLS_and_SLC1A2_Glutamate_NMDA_1_2B_complex	DAM1	Proliferation	Signaling by Glutamate	sig	non-sig	non-sig	non-sig
CPI-CC0DCE246DF	Glutamate_byGLS_and_SLC1A2_Glutamate_NMDA_1_2B_complex	T cell	MHC 1	Signaling by Glutamate	sig	non-sig	non-sig	non-sig
CPI-CC0DCE246DF	Glutamate_byGLS_and_SLC1A2_Glutamate_NMDA_1_2B_complex	T cell	Monocyte	Signaling by Glutamate	sig	non-sig	non-sig	non-sig
CPI-CC0E366FBD5	Glutamate_byGLS_and_SLC1A3_Glutamate_NMDA_1_2B_complex	Homeostasis 1	DAM1	Signaling by Glutamate	sig	non-sig	non-sig	non-sig
CPI-CC0E366FBD5	Glutamate_byGLS_and_SLC1A3_Glutamate_NMDA_1_2B_complex	Homeostasis 1	Homeostasis 2	Signaling by Glutamate	sig	non-sig	non-sig	non-sig
CPI-CC0E366FBD5	Glutamate_byGLS_and_SLC1A3_Glutamate_NMDA_1_2B_complex	Homeostasis 1	T cell	Signaling by Glutamate	sig	non-sig	non-sig	non-sig
CPI-CC0E366FBD5	Glutamate_byGLS_and_SLC1A3_Glutamate_NMDA_1_2B_complex	Homeostasis 1	MHC 1	Signaling by Glutamate	sig	non-sig	non-sig	non-sig
CPI-CC0E366FBD5	Glutamate_byGLS_and_SLC1A3_Glutamate_NMDA_1_2B_complex	Homeostasis 1	MHC 2	Signaling by Glutamate	sig	non-sig	non-sig	non-sig
CPI-CC0E366FBD5	Glutamate_byGLS_and_SLC1A3_Glutamate_NMDA_1_2B_complex	Homeostasis 1	Macrophage	Signaling by Glutamate	sig	non-sig	non-sig	non-sig
CPI-CC0E366FBD5	Glutamate_byGLS_and_SLC1A3_Glutamate_NMDA_1_2B_complex	Homeostasis 1	Monocyte	Signaling by Glutamate	sig	sig	non-sig	non-sig
CPI-CC0E366FBD5	Glutamate_byGLS_and_SLC1A3_Glutamate_NMDA_1_2B_complex	Homeostasis 1	Proliferation	Signaling by Glutamate	sig	non-sig	non-sig	non-sig
CPI-CC0E366FBD5	Glutamate_byGLS_and_SLC1A3_Glutamate_NMDA_1_2B_complex	Homeostasis 1	Tau Microglia	Signaling by Glutamate	sig	non-sig	non-sig	non-sig
CPI-CC0E366FBD5	Glutamate_byGLS_and_SLC1A3_Glutamate_NMDA_1_2B_complex	Homeostasis 2	DAM1	Signaling by Glutamate	sig	non-sig	non-sig	non-sig
CPI-CC0E366FBD5	Glutamate_byGLS_and_SLC1A3_Glutamate_NMDA_1_2B_complex	Homeostasis 2	Homeostasis 2	Signaling by Glutamate	sig	non-sig	non-sig	non-sig
CPI-CC0E366FBD5	Glutamate_byGLS_and_SLC1A3_Glutamate_NMDA_1_2B_complex	Homeostasis 2	T cell	Signaling by Glutamate	sig	non-sig	non-sig	non-sig
CPI-CC0E366FBD5	Glutamate_byGLS_and_SLC1A3_Glutamate_NMDA_1_2B_complex	Homeostasis 2	MHC 1	Signaling by Glutamate	sig	non-sig	non-sig	non-sig
CPI-CC0E366FBD5	Glutamate_byGLS_and_SLC1A3_Glutamate_NMDA_1_2B_complex	Homeostasis 2	MHC 2	Signaling by Glutamate	sig	non-sig	non-sig	non-sig
CPI-CC0E366FBD5	Glutamate_byGLS_and_SLC1A3_Glutamate_NMDA_1_2B_complex	Homeostasis 2	Macrophage	Signaling by Glutamate	sig	non-sig	non-sig	non-sig
CPI-CC0E366FBD5	Glutamate_byGLS_and_SLC1A3_Glutamate_NMDA_1_2B_complex	Homeostasis 2	Monocyte	Signaling by Glutamate	sig	non-sig	non-sig	non-sig
CPI-CC0E366FBD5	Glutamate_byGLS_and_SLC1A3_Glutamate_NMDA_1_2B_complex	Homeostasis 2	Proliferation	Signaling by Glutamate	sig	non-sig	non-sig	non-sig
CPI-CC0E366FBD5	Glutamate_byGLS_and_SLC1A3_Glutamate_NMDA_1_2B_complex	Homeostasis 2	Tau Microglia	Signaling by Glutamate	sig	non-sig	non-sig	non-sig
CPI-CC0E366FBD5	Glutamate_byGLS_and_SLC1A3_Glutamate_NMDA_1_2B_complex	MHC 1	MHC 1	Signaling by Glutamate	sig	non-sig	non-sig	non-sig
CPI-CC0E366FBD5	Glutamate_byGLS_and_SLC1A3_Glutamate_NMDA_1_2B_complex	MHC 1	Monocyte	Signaling by Glutamate	sig	sig	non-sig	non-sig
CPI-CC0E366FBD5	Glutamate_byGLS_and_SLC1A3_Glutamate_NMDA_1_2B_complex	Proliferation	Homeostasis 1	Signaling by Glutamate	sig	non-sig	non-sig	non-sig
CPI-CC0E366FBD5	Glutamate_byGLS_and_SLC1A3_Glutamate_NMDA_1_2B_complex	Proliferation	Proliferation	Signaling by Glutamate	sig	non-sig	non-sig	non-sig
CPI-CC0222B6286	Glutamate_byGLS_and_SLC1A2_Glutamate_NMDA_1_2C_complex	DAM1	Homeostasis 1	Signaling by Glutamate	sig	non-sig	non-sig	non-sig
CPI-CC0222B6286	Glutamate_byGLS_and_SLC1A2_Glutamate_NMDA_1_2C_complex	DAM1	Inflammation	Signaling by Glutamate	sig	non-sig	non-sig	non-sig
CPI-CC0222B6286	Glutamate_byGLS_and_SLC1A2_Glutamate_NMDA_1_2C_complex	DAM1	Macrophage	Signaling by Glutamate	sig	non-sig	non-sig	non-sig
CPI-CC0222B6286	Glutamate_byGLS_and_SLC1A2_Glutamate_NMDA_1_2C_complex	DAM1	Proliferation	Signaling by Glutamate	sig	non-sig	non-sig	non-sig
CPI-CC0222B6286	Glutamate_byGLS_and_SLC1A2_Glutamate_NMDA_1_2C_complex	T cell	Homeostasis 1	Signaling by Glutamate	sig	non-sig	non-sig	non-sig
CPI-CC0222B6286	Glutamate_byGLS_and_SLC1A2_Glutamate_NMDA_1_2C_complex	T cell	Inflammation	Signaling by Glutamate	sig	non-sig	non-sig	non-sig
CPI-CC0222B6286	Glutamate_byGLS_and_SLC1A2_Glutamate_NMDA_1_2C_complex	Macrophage	Homeostasis 1	Signaling by Glutamate	sig	non-sig	non-sig	non-sig
CPI-CC0222B6286	Glutamate_byGLS_and_SLC1A2_Glutamate_NMDA_1_2C_complex	Macrophage	Inflammation	Signaling by Glutamate	sig	non-sig	non-sig	non-sig
CPI-CC0222B6286	Glutamate_byGLS_and_SLC1A2_Glutamate_NMDA_1_2C_complex	Tau Microglia	Homeostasis 1	Signaling by Glutamate	sig	non-sig	non-sig	non-sig
CPI-CC0222B6286	Glutamate_byGLS_and_SLC1A2_Glutamate_NMDA_1_2C_complex	Tau Microglia	Inflammation	Signaling by Glutamate	sig	non-sig	non-sig	non-sig
CPI-CC036772033	Glutamate_byGLS_and_SLC1A3_Glutamate_NMDA_1_2C_complex	Homeostasis 1	Inflammation	Signaling by Glutamate	sig	non-sig	non-sig	non-sig
CPI-CC036772033	Glutamate_byGLS_and_SLC1A3_Glutamate_NMDA_1_2C_complex	Homeostasis 1	Proliferation	Signaling by Glutamate	sig	sig	non-sig	non-sig
CPI-CC036772033	Glutamate_byGLS_and_SLC1A3_Glutamate_NMDA_1_2C_complex	Homeostasis 2	Homeostasis 1	Signaling by Glutamate	sig	non-sig	non-sig	non-sig
CPI-CC036772033	Glutamate_byGLS_and_SLC1A3_Glutamate_NMDA_1_2C_complex	Homeostasis 2	Inflammation	Signaling by Glutamate	sig	non-sig	non-sig	non-sig
CPI-CC036772033	Glutamate_byGLS_and_SLC1A3_Glutamate_NMDA_1_2C_complex	Homeostasis 2	Macrophage	Signaling by Glutamate	sig	non-sig	non-sig	non-sig
CPI-CC036772033	Glutamate_byGLS_and_SLC1A3_Glutamate_NMDA_1_2C_complex	Homeostasis 2	Proliferation	Signaling by Glutamate	sig	non-sig	non-sig	non-sig
CPI-CC036772033	Glutamate_byGLS_and_SLC1A3_Glutamate_NMDA_1_2C_complex	MHC 1	Homeostasis 1	Signaling by Glutamate	sig	sig	non-sig	non-sig
CPI-CC036772033	Glutamate_byGLS_and_SLC1A3_Glutamate_NMDA_1_2C_complex	MHC 1	Inflammation	Signaling by Glutamate	sig	non-sig	non-sig	non-sig
CPI-CC036772033	Glutamate_byGLS_and_SLC1A3_Glutamate_NMDA_1_2C_complex	Proliferation	Inflammation	Signaling by Glutamate	sig	non-sig	non-sig	non-sig
CPI-CC036772033	Glutamate_byGLS_and_SLC1A3_Glutamate_NMDA_1_2C_complex	Proliferation	Macrophage	Signaling by Glutamate	sig	non-sig	non-sig	non-sig
CPI-CC0DD99C42B	Glutamate_byGLS_and_SLC1A2_Glutamate_NMDA_1_2D_complex	DAM1	DAM1	Signaling by Glutamate	sig	non-sig	non-sig	non-sig
CPI-CC0DD99C42B	Glutamate_byGLS_and_SLC1A2_Glutamate_NMDA_1_2D_complex	DAM1	Homeostasis 1	Signaling by Glutamate	sig	non-sig	non-sig	non-sig
CPI-CC0DD99C42B	Glutamate_byGLS_and_SLC1A2_Glutamate_NMDA_1_2D_complex	DAM1	MHC 1	Signaling by Glutamate	sig	non-sig	non-sig	non-sig
CPI-CC0DD99C42B	Glutamate_byGLS_and_SLC1A2_Glutamate_NMDA_1_2D_complex	DAM1	Proliferation	Signaling by Glutamate	sig	non-sig	non-sig	non-sig
CPI-CC0DD99C42B	Glutamate_byGLS_and_SLC1A2_Glutamate_NMDA_1_2D_complex	DAM1	Tau Microglia	Signaling by Glutamate	sig	non-sig	non-sig	non-sig
CPI-CC016C39E1C	Glutamate_byGLS_and_SLC1A3_Glutamate_NMDA_1_2D_complex	Homeostasis 1	Homeostasis 2	Signaling by Glutamate	sig	non-sig	non-sig	non-sig
CPI-CC016C39E1C	Glutamate_byGLS_and_SLC1A3_Glutamate_NMDA_1_2D_complex	Homeostasis 1	Inflammation	Signaling by Glutamate	sig	non-sig	non-sig	non-sig
CPI-CC016C39E1C	Glutamate_byGLS_and_SLC1A3_Glutamate_NMDA_1_2D_complex	Homeostasis 1	MHC 2	Signaling by Glutamate	sig	non-sig	non-sig	non-sig
CPI-CC016C39E1C	Glutamate_byGLS_and_SLC1A3_Glutamate_NMDA_1_2D_complex	Homeostasis 1	Macrophage	Signaling by Glutamate	sig	non-sig	non-sig	non-sig
CPI-CC016C39E1C	Glutamate_byGLS_and_SLC1A3_Glutamate_NMDA_1_2D_complex	Homeostasis 1	Monocyte	Signaling by Glutamate	sig	non-sig	non-sig	non-sig
CPI-CC016C39E1C	Glutamate_byGLS_and_SLC1A3_Glutamate_NMDA_1_2D_complex	Homeostasis 1	Proliferation	Signaling by Glutamate	sig	sig	non-sig	non-sig
CPI-CC016C39E1C	Glutamate_byGLS_and_SLC1A3_Glutamate_NMDA_1_2D_complex	Homeostasis 2	DAM1	Signaling by Glutamate	sig	non-sig	non-sig	non-sig
CPI-CC016C39E1C	Glutamate_byGLS_and_SLC1A3_Glutamate_NMDA_1_2D_complex	Homeostasis 2	Homeostasis 1	Signaling by Glutamate	sig	non-sig	non-sig	non-sig
CPI-CC016C39E1C	Glutamate_byGLS_and_SLC1A3_Glutamate_NMDA_1_2D_complex	Homeostasis 2	Homeostasis 2	Signaling by Glutamate	sig	non-sig	non-sig	non-sig
CPI-CC016C39E1C	Glutamate_byGLS_and_SLC1A3_Glutamate_NMDA_1_2D_complex	Homeostasis 2	Inflammation	Signaling by Glutamate	sig	non-sig	non-sig	non-sig
CPI-CC016C39E1C	Glutamate_byGLS_and_SLC1A3_Glutamate_NMDA_1_2D_complex	Homeostasis 2	MHC 1	Signaling by Glutamate	sig	non-sig	non-sig	non-sig
CPI-CC016C39E1C	Glutamate_byGLS_and_SLC1A3_Glutamate_NMDA_1_2D_complex	Homeostasis 2	MHC 2	Signaling by Glutamate	sig	non-sig	non-sig	non-sig
CPI-CC016C39E1C	Glutamate_byGLS_and_SLC1A3_Glutamate_NMDA_1_2D_complex	Homeostasis 2	Macrophage	Signaling by Glutamate	sig	non-sig	non-sig	non-sig
CPI-CC016C39E1C	Glutamate_byGLS_and_SLC1A3_Glutamate_NMDA_1_2D_complex	Homeostasis 2	Monocyte	Signaling by Glutamate	sig	non-sig	non-sig	non-sig
CPI-CC016C39E1C	Glutamate_byGLS_and_SLC1A3_Glutamate_NMDA_1_2D_complex	Homeostasis 2	Proliferation	Signaling by Glutamate	sig	non-sig	non-sig	non-sig
CPI-CC016C39E1C	Glutamate_byGLS_and_SLC1A3_Glutamate_NMDA_1_2D_complex	Homeostasis 2	Tau Microglia	Signaling by Glutamate	sig	non-sig	non-sig	non-sig
CPI-CS03F7F264A	Glutamate_byGLS_and_SLC1A2_GRM1	DAM1	Homeostasis 1	Signaling by Glutamate	sig	non-sig	non-sig	non-sig
CPI-CS03F7F264A	Glutamate_byGLS_and_SLC1A2_GRM1	DAM1	Monocyte	Signaling by Glutamate	sig	non-sig	non-sig	non-sig
CPI-CS03F7F264A	Glutamate_byGLS_and_SLC1A2_GRM1	DAM1	Proliferation	Signaling by Glutamate	sig	non-sig	non-sig	non-sig
CPI-CS03F7F264A	Glutamate_byGLS_and_SLC1A2_GRM1	Macrophage	Homeostasis 2	Signaling by Glutamate	sig	non-sig	non-sig	non-sig
CPI-CS03F7F264A	Glutamate_byGLS_and_SLC1A2_GRM1	Macrophage	T cell	Signaling by Glutamate	sig	non-sig	non-sig	non-sig
CPI-CS03F7F264A	Glutamate_byGLS_and_SLC1A2_GRM1	Tau Microglia	Homeostasis 2	Signaling by Glutamate	sig	non-sig	non-sig	non-sig
CPI-CS03F7F264A	Glutamate_byGLS_and_SLC1A2_GRM1	Tau Microglia	T cell	Signaling by Glutamate	sig	non-sig	non-sig	non-sig
CPI-CS03F7F264A	Glutamate_byGLS_and_SLC1A2_GRM1	Tau Microglia	Tau Microglia	Signaling by Glutamate	sig	non-sig	non-sig	non-sig
CPI-CS06BDC8BFA	Glutamate_byGLS_and_SLC1A3_GRM1	Homeostasis 1	Homeostasis 2	Signaling by Glutamate	sig	non-sig	non-sig	non-sig
CPI-CS06BDC8BFA	Glutamate_byGLS_and_SLC1A3_GRM1	Homeostasis 1	T cell	Signaling by Glutamate	sig	non-sig	non-sig	non-sig
CPI-CS06BDC8BFA	Glutamate_byGLS_and_SLC1A3_GRM1	Homeostasis 1	MHC 1	Signaling by Glutamate	sig	non-sig	non-sig	non-sig
CPI-CS06BDC8BFA	Glutamate_byGLS_and_SLC1A3_GRM1	Homeostasis 1	MHC 2	Signaling by Glutamate	sig	non-sig	non-sig	non-sig
CPI-CS06BDC8BFA	Glutamate_byGLS_and_SLC1A3_GRM1	Homeostasis 1	Monocyte	Signaling by Glutamate	sig	non-sig	non-sig	non-sig
CPI-CS06BDC8BFA	Glutamate_byGLS_and_SLC1A3_GRM1	Homeostasis 1	Proliferation	Signaling by Glutamate	sig	non-sig	non-sig	non-sig
CPI-CS06BDC8BFA	Glutamate_byGLS_and_SLC1A3_GRM1	Homeostasis 1	Tau Microglia	Signaling by Glutamate	sig	non-sig	non-sig	non-sig
CPI-CS06BDC8BFA	Glutamate_byGLS_and_SLC1A3_GRM1	Homeostasis 2	DAM1	Signaling by Glutamate	sig	non-sig	non-sig	non-sig
CPI-CS06BDC8BFA	Glutamate_byGLS_and_SLC1A3_GRM1	Homeostasis 2	Homeostasis 1	Signaling by Glutamate	sig	non-sig	non-sig	non-sig
CPI-CS06BDC8BFA	Glutamate_byGLS_and_SLC1A3_GRM1	Homeostasis 2	Homeostasis 2	Signaling by Glutamate	sig	non-sig	non-sig	non-sig
CPI-CS06BDC8BFA	Glutamate_byGLS_and_SLC1A3_GRM1	Homeostasis 2	T cell	Signaling by Glutamate	sig	non-sig	non-sig	non-sig
CPI-CS06BDC8BFA	Glutamate_byGLS_and_SLC1A3_GRM1	Homeostasis 2	MHC 1	Signaling by Glutamate	sig	non-sig	non-sig	non-sig
CPI-CS06BDC8BFA	Glutamate_byGLS_and_SLC1A3_GRM1	Homeostasis 2	MHC 2	Signaling by Glutamate	sig	non-sig	non-sig	non-sig
CPI-CS06BDC8BFA	Glutamate_byGLS_and_SLC1A3_GRM1	Homeostasis 2	Macrophage	Signaling by Glutamate	sig	non-sig	non-sig	non-sig
CPI-CS06BDC8BFA	Glutamate_byGLS_and_SLC1A3_GRM1	Homeostasis 2	Monocyte	Signaling by Glutamate	sig	non-sig	non-sig	non-sig
CPI-CS06BDC8BFA	Glutamate_byGLS_and_SLC1A3_GRM1	Homeostasis 2	Proliferation	Signaling by Glutamate	sig	non-sig	non-sig	non-sig
CPI-CS06BDC8BFA	Glutamate_byGLS_and_SLC1A3_GRM1	Homeostasis 2	Tau Microglia	Signaling by Glutamate	sig	non-sig	non-sig	non-sig
CPI-CS06BDC8BFA	Glutamate_byGLS_and_SLC1A3_GRM1	MHC 1	Homeostasis 2	Signaling by Glutamate	sig	non-sig	non-sig	non-sig
CPI-CS06BDC8BFA	Glutamate_byGLS_and_SLC1A3_GRM1	MHC 1	T cell	Signaling by Glutamate	sig	non-sig	non-sig	non-sig
CPI-CS06BDC8BFA	Glutamate_byGLS_and_SLC1A3_GRM1	MHC 1	Tau Microglia	Signaling by Glutamate	sig	non-sig	non-sig	non-sig
CPI-CS06BDC8BFA	Glutamate_byGLS_and_SLC1A3_GRM1	Proliferation	Homeostasis 1	Signaling by Glutamate	sig	non-sig	non-sig	non-sig
CPI-CS06BDC8BFA	Glutamate_byGLS_and_SLC1A3_GRM1	Proliferation	Monocyte	Signaling by Glutamate	sig	non-sig	non-sig	non-sig
CPI-CS06BDC8BFA	Glutamate_byGLS_and_SLC1A3_GRM1	Proliferation	Proliferation	Signaling by Glutamate	sig	non-sig	non-sig	non-sig
CPI-CS0444827FD	Glutamate_byGLS_and_SLC1A2_GRM3	DAM1	Homeostasis 1	Signaling by Glutamate	sig	non-sig	non-sig	non-sig
CPI-CS0444827FD	Glutamate_byGLS_and_SLC1A2_GRM3	DAM1	Macrophage	Signaling by Glutamate	sig	non-sig	non-sig	non-sig
CPI-CS0444827FD	Glutamate_byGLS_and_SLC1A2_GRM3	T cell	Homeostasis 2	Signaling by Glutamate	sig	non-sig	non-sig	non-sig
CPI-CS0444827FD	Glutamate_byGLS_and_SLC1A2_GRM3	T cell	Monocyte	Signaling by Glutamate	sig	non-sig	non-sig	non-sig
CPI-CS0444827FD	Glutamate_byGLS_and_SLC1A2_GRM3	T cell	Proliferation	Signaling by Glutamate	sig	non-sig	non-sig	non-sig
CPI-CS0D33309E7	Glutamate_byGLS_and_SLC1A3_GRM3	Homeostasis 1	DAM1	Signaling by Glutamate	sig	non-sig	non-sig	non-sig
CPI-CS0D33309E7	Glutamate_byGLS_and_SLC1A3_GRM3	Homeostasis 1	Homeostasis 2	Signaling by Glutamate	sig	non-sig	non-sig	non-sig
CPI-CS0D33309E7	Glutamate_byGLS_and_SLC1A3_GRM3	Homeostasis 1	Inflammation	Signaling by Glutamate	sig	non-sig	non-sig	non-sig
CPI-CS0D33309E7	Glutamate_byGLS_and_SLC1A3_GRM3	Homeostasis 1	T cell	Signaling by Glutamate	sig	non-sig	non-sig	non-sig
CPI-CS0D33309E7	Glutamate_byGLS_and_SLC1A3_GRM3	Homeostasis 1	MHC 1	Signaling by Glutamate	sig	non-sig	non-sig	non-sig
CPI-CS0D33309E7	Glutamate_byGLS_and_SLC1A3_GRM3	Homeostasis 1	MHC 2	Signaling by Glutamate	sig	non-sig	non-sig	non-sig
CPI-CS0D33309E7	Glutamate_byGLS_and_SLC1A3_GRM3	Homeostasis 1	Proliferation	Signaling by Glutamate	sig	non-sig	non-sig	non-sig
CPI-CS0D33309E7	Glutamate_byGLS_and_SLC1A3_GRM3	Homeostasis 1	Tau Microglia	Signaling by Glutamate	sig	non-sig	non-sig	non-sig
CPI-CS0D33309E7	Glutamate_byGLS_and_SLC1A3_GRM3	Homeostasis 2	DAM1	Signaling by Glutamate	sig	non-sig	non-sig	non-sig
CPI-CS0D33309E7	Glutamate_byGLS_and_SLC1A3_GRM3	Homeostasis 2	Homeostasis 1	Signaling by Glutamate	sig	non-sig	non-sig	non-sig
CPI-CS0D33309E7	Glutamate_byGLS_and_SLC1A3_GRM3	Homeostasis 2	Homeostasis 2	Signaling by Glutamate	sig	non-sig	non-sig	non-sig
CPI-CS0D33309E7	Glutamate_byGLS_and_SLC1A3_GRM3	Homeostasis 2	Inflammation	Signaling by Glutamate	sig	non-sig	non-sig	non-sig
CPI-CS0D33309E7	Glutamate_byGLS_and_SLC1A3_GRM3	Homeostasis 2	T cell	Signaling by Glutamate	sig	non-sig	non-sig	non-sig
CPI-CS0D33309E7	Glutamate_byGLS_and_SLC1A3_GRM3	Homeostasis 2	MHC 1	Signaling by Glutamate	sig	non-sig	non-sig	non-sig
CPI-CS0D33309E7	Glutamate_byGLS_and_SLC1A3_GRM3	Homeostasis 2	MHC 2	Signaling by Glutamate	sig	non-sig	non-sig	non-sig
CPI-CS0D33309E7	Glutamate_byGLS_and_SLC1A3_GRM3	Homeostasis 2	Macrophage	Signaling by Glutamate	sig	non-sig	non-sig	non-sig
CPI-CS0D33309E7	Glutamate_byGLS_and_SLC1A3_GRM3	Homeostasis 2	Monocyte	Signaling by Glutamate	sig	non-sig	non-sig	non-sig
CPI-CS0D33309E7	Glutamate_byGLS_and_SLC1A3_GRM3	Homeostasis 2	Proliferation	Signaling by Glutamate	sig	non-sig	non-sig	non-sig
CPI-CS0D33309E7	Glutamate_byGLS_and_SLC1A3_GRM3	Homeostasis 2	Tau Microglia	Signaling by Glutamate	sig	non-sig	non-sig	non-sig
CPI-CS0D33309E7	Glutamate_byGLS_and_SLC1A3_GRM3	MHC 1	DAM1	Signaling by Glutamate	sig	non-sig	non-sig	non-sig
CPI-CS0D33309E7	Glutamate_byGLS_and_SLC1A3_GRM3	MHC 1	Homeostasis 2	Signaling by Glutamate	sig	non-sig	non-sig	non-sig
CPI-CS0D33309E7	Glutamate_byGLS_and_SLC1A3_GRM3	MHC 1	MHC 1	Signaling by Glutamate	sig	non-sig	non-sig	non-sig
CPI-CS0D33309E7	Glutamate_byGLS_and_SLC1A3_GRM3	MHC 1	Proliferation	Signaling by Glutamate	sig	non-sig	non-sig	non-sig
CPI-CS0D33309E7	Glutamate_byGLS_and_SLC1A3_GRM3	Proliferation	Homeostasis 1	Signaling by Glutamate	sig	non-sig	non-sig	non-sig
CPI-CS065936301	Glutamate_byGLS_and_SLC17A7_GRM5	Proliferation	Homeostasis 1	Signaling by Glutamate	sig	non-sig	non-sig	non-sig
CPI-CS04A0AEE4C	Glutamate_byGLS_and_SLC1A2_GRM5	DAM1	Proliferation	Signaling by Glutamate	sig	non-sig	non-sig	non-sig
CPI-CS04A0AEE4C	Glutamate_byGLS_and_SLC1A2_GRM5	T cell	MHC 1	Signaling by Glutamate	sig	non-sig	non-sig	non-sig
CPI-CS0305D24F6	Glutamate_byGLS_and_SLC1A3_GRM5	Homeostasis 1	DAM1	Signaling by Glutamate	sig	non-sig	non-sig	non-sig
CPI-CS0305D24F6	Glutamate_byGLS_and_SLC1A3_GRM5	Homeostasis 1	Homeostasis 2	Signaling by Glutamate	sig	non-sig	non-sig	non-sig
CPI-CS0305D24F6	Glutamate_byGLS_and_SLC1A3_GRM5	Homeostasis 1	T cell	Signaling by Glutamate	sig	non-sig	non-sig	non-sig
CPI-CS0305D24F6	Glutamate_byGLS_and_SLC1A3_GRM5	Homeostasis 1	MHC 1	Signaling by Glutamate	sig	non-sig	non-sig	non-sig
CPI-CS0305D24F6	Glutamate_byGLS_and_SLC1A3_GRM5	Homeostasis 1	Macrophage	Signaling by Glutamate	sig	non-sig	non-sig	non-sig
CPI-CS0305D24F6	Glutamate_byGLS_and_SLC1A3_GRM5	Homeostasis 2	DAM1	Signaling by Glutamate	sig	non-sig	non-sig	non-sig
CPI-CS0305D24F6	Glutamate_byGLS_and_SLC1A3_GRM5	Homeostasis 2	Homeostasis 2	Signaling by Glutamate	sig	non-sig	non-sig	non-sig
CPI-CS0305D24F6	Glutamate_byGLS_and_SLC1A3_GRM5	Homeostasis 2	MHC 1	Signaling by Glutamate	sig	non-sig	non-sig	non-sig
CPI-CS0305D24F6	Glutamate_byGLS_and_SLC1A3_GRM5	Homeostasis 2	Macrophage	Signaling by Glutamate	sig	non-sig	non-sig	non-sig
CPI-CS0305D24F6	Glutamate_byGLS_and_SLC1A3_GRM5	Homeostasis 2	Monocyte	Signaling by Glutamate	sig	non-sig	non-sig	non-sig
CPI-CS0305D24F6	Glutamate_byGLS_and_SLC1A3_GRM5	MHC 1	MHC 1	Signaling by Glutamate	sig	non-sig	non-sig	non-sig
CPI-CS0305D24F6	Glutamate_byGLS_and_SLC1A3_GRM5	Proliferation	Homeostasis 1	Signaling by Glutamate	sig	non-sig	non-sig	non-sig
CPI-CS0305D24F6	Glutamate_byGLS_and_SLC1A3_GRM5	Proliferation	Proliferation	Signaling by Glutamate	sig	non-sig	non-sig	non-sig
CPI-CS007136501	Glutamate_byGLS_and_SLC1A2_GRM7	DAM1	Homeostasis 1	Signaling by Glutamate	sig	non-sig	non-sig	non-sig
CPI-CS007136501	Glutamate_byGLS_and_SLC1A2_GRM7	DAM1	Monocyte	Signaling by Glutamate	sig	non-sig	non-sig	non-sig
CPI-CS007136501	Glutamate_byGLS_and_SLC1A2_GRM7	DAM1	Proliferation	Signaling by Glutamate	sig	non-sig	non-sig	non-sig
CPI-CS007136501	Glutamate_byGLS_and_SLC1A2_GRM7	T cell	MHC 1	Signaling by Glutamate	sig	non-sig	non-sig	non-sig
CPI-CS007136501	Glutamate_byGLS_and_SLC1A2_GRM7	T cell	Monocyte	Signaling by Glutamate	sig	non-sig	non-sig	non-sig
CPI-CS09F74FD39	Glutamate_byGLS_and_SLC1A3_GRM7	Homeostasis 1	DAM1	Signaling by Glutamate	sig	non-sig	non-sig	non-sig
CPI-CS09F74FD39	Glutamate_byGLS_and_SLC1A3_GRM7	Homeostasis 1	Homeostasis 2	Signaling by Glutamate	sig	non-sig	non-sig	non-sig
CPI-CS09F74FD39	Glutamate_byGLS_and_SLC1A3_GRM7	Homeostasis 1	T cell	Signaling by Glutamate	sig	non-sig	non-sig	non-sig
CPI-CS09F74FD39	Glutamate_byGLS_and_SLC1A3_GRM7	Homeostasis 1	MHC 1	Signaling by Glutamate	sig	non-sig	non-sig	non-sig
CPI-CS09F74FD39	Glutamate_byGLS_and_SLC1A3_GRM7	Homeostasis 1	MHC 2	Signaling by Glutamate	sig	non-sig	non-sig	non-sig
CPI-CS09F74FD39	Glutamate_byGLS_and_SLC1A3_GRM7	Homeostasis 1	Macrophage	Signaling by Glutamate	sig	non-sig	non-sig	non-sig
CPI-CS09F74FD39	Glutamate_byGLS_and_SLC1A3_GRM7	Homeostasis 1	Monocyte	Signaling by Glutamate	sig	non-sig	non-sig	non-sig
CPI-CS09F74FD39	Glutamate_byGLS_and_SLC1A3_GRM7	Homeostasis 1	Tau Microglia	Signaling by Glutamate	sig	non-sig	non-sig	non-sig
CPI-CS09F74FD39	Glutamate_byGLS_and_SLC1A3_GRM7	Homeostasis 2	DAM1	Signaling by Glutamate	sig	non-sig	non-sig	non-sig
CPI-CS09F74FD39	Glutamate_byGLS_and_SLC1A3_GRM7	Homeostasis 2	Homeostasis 2	Signaling by Glutamate	sig	non-sig	non-sig	non-sig
CPI-CS09F74FD39	Glutamate_byGLS_and_SLC1A3_GRM7	Homeostasis 2	T cell	Signaling by Glutamate	sig	non-sig	non-sig	non-sig
CPI-CS09F74FD39	Glutamate_byGLS_and_SLC1A3_GRM7	Homeostasis 2	MHC 1	Signaling by Glutamate	sig	non-sig	non-sig	non-sig
CPI-CS09F74FD39	Glutamate_byGLS_and_SLC1A3_GRM7	Homeostasis 2	MHC 2	Signaling by Glutamate	sig	non-sig	non-sig	non-sig
CPI-CS09F74FD39	Glutamate_byGLS_and_SLC1A3_GRM7	Homeostasis 2	Macrophage	Signaling by Glutamate	sig	non-sig	non-sig	non-sig
CPI-CS09F74FD39	Glutamate_byGLS_and_SLC1A3_GRM7	Homeostasis 2	Monocyte	Signaling by Glutamate	sig	non-sig	non-sig	non-sig
CPI-CS09F74FD39	Glutamate_byGLS_and_SLC1A3_GRM7	Homeostasis 2	Proliferation	Signaling by Glutamate	sig	non-sig	non-sig	non-sig
CPI-CS09F74FD39	Glutamate_byGLS_and_SLC1A3_GRM7	Homeostasis 2	Tau Microglia	Signaling by Glutamate	sig	non-sig	non-sig	non-sig
CPI-CS09F74FD39	Glutamate_byGLS_and_SLC1A3_GRM7	MHC 1	MHC 1	Signaling by Glutamate	sig	non-sig	non-sig	non-sig
CPI-CS09F74FD39	Glutamate_byGLS_and_SLC1A3_GRM7	MHC 1	Monocyte	Signaling by Glutamate	sig	non-sig	non-sig	non-sig
CPI-CS09F74FD39	Glutamate_byGLS_and_SLC1A3_GRM7	Proliferation	Homeostasis 1	Signaling by Glutamate	sig	non-sig	non-sig	non-sig
CPI-CS09F74FD39	Glutamate_byGLS_and_SLC1A3_GRM7	Proliferation	Monocyte	Signaling by Glutamate	sig	non-sig	non-sig	non-sig
CPI-CS09F74FD39	Glutamate_byGLS_and_SLC1A3_GRM7	Proliferation	Proliferation	Signaling by Glutamate	sig	non-sig	non-sig	non-sig
CPI-CS0B9E5E3DB	Glutamate_byGLS_and_SLC1A2_GRM8	DAM1	Homeostasis 1	Signaling by Glutamate	sig	non-sig	non-sig	non-sig
CPI-CS0B9E5E3DB	Glutamate_byGLS_and_SLC1A2_GRM8	DAM1	MHC 1	Signaling by Glutamate	sig	non-sig	non-sig	non-sig
CPI-CS0B9E5E3DB	Glutamate_byGLS_and_SLC1A2_GRM8	DAM1	Macrophage	Signaling by Glutamate	sig	non-sig	non-sig	non-sig
CPI-CS0B9E5E3DB	Glutamate_byGLS_and_SLC1A2_GRM8	DAM1	Monocyte	Signaling by Glutamate	sig	non-sig	non-sig	non-sig
CPI-CS0B9E5E3DB	Glutamate_byGLS_and_SLC1A2_GRM8	T cell	Homeostasis 2	Signaling by Glutamate	sig	non-sig	non-sig	non-sig
CPI-CS0B9E5E3DB	Glutamate_byGLS_and_SLC1A2_GRM8	T cell	Inflammation	Signaling by Glutamate	sig	non-sig	non-sig	non-sig
CPI-CS0B9E5E3DB	Glutamate_byGLS_and_SLC1A2_GRM8	T cell	T cell	Signaling by Glutamate	sig	non-sig	non-sig	non-sig
CPI-CS0B9E5E3DB	Glutamate_byGLS_and_SLC1A2_GRM8	Macrophage	Homeostasis 2	Signaling by Glutamate	sig	non-sig	non-sig	non-sig
CPI-CS0B9E5E3DB	Glutamate_byGLS_and_SLC1A2_GRM8	Macrophage	T cell	Signaling by Glutamate	sig	non-sig	non-sig	non-sig
CPI-CS0B9E5E3DB	Glutamate_byGLS_and_SLC1A2_GRM8	Tau Microglia	Homeostasis 2	Signaling by Glutamate	sig	non-sig	non-sig	non-sig
CPI-CS0B9E5E3DB	Glutamate_byGLS_and_SLC1A2_GRM8	Tau Microglia	T cell	Signaling by Glutamate	sig	non-sig	non-sig	non-sig
CPI-CS017089111	Glutamate_byGLS_and_SLC1A3_GRM8	Homeostasis 1	DAM1	Signaling by Glutamate	sig	non-sig	non-sig	non-sig
CPI-CS017089111	Glutamate_byGLS_and_SLC1A3_GRM8	Homeostasis 1	Homeostasis 2	Signaling by Glutamate	sig	non-sig	non-sig	non-sig
CPI-CS017089111	Glutamate_byGLS_and_SLC1A3_GRM8	Homeostasis 1	Inflammation	Signaling by Glutamate	sig	non-sig	non-sig	non-sig
CPI-CS017089111	Glutamate_byGLS_and_SLC1A3_GRM8	Homeostasis 1	T cell	Signaling by Glutamate	sig	non-sig	non-sig	non-sig
CPI-CS017089111	Glutamate_byGLS_and_SLC1A3_GRM8	Homeostasis 1	MHC 2	Signaling by Glutamate	sig	non-sig	non-sig	non-sig
CPI-CS017089111	Glutamate_byGLS_and_SLC1A3_GRM8	Homeostasis 1	Macrophage	Signaling by Glutamate	sig	sig	non-sig	non-sig
CPI-CS017089111	Glutamate_byGLS_and_SLC1A3_GRM8	Homeostasis 1	Proliferation	Signaling by Glutamate	sig	non-sig	non-sig	non-sig
CPI-CS017089111	Glutamate_byGLS_and_SLC1A3_GRM8	Homeostasis 1	Tau Microglia	Signaling by Glutamate	sig	non-sig	non-sig	non-sig
CPI-CS017089111	Glutamate_byGLS_and_SLC1A3_GRM8	Homeostasis 2	DAM1	Signaling by Glutamate	sig	non-sig	non-sig	non-sig
CPI-CS017089111	Glutamate_byGLS_and_SLC1A3_GRM8	Homeostasis 2	Homeostasis 1	Signaling by Glutamate	sig	non-sig	non-sig	non-sig
CPI-CS017089111	Glutamate_byGLS_and_SLC1A3_GRM8	Homeostasis 2	Homeostasis 2	Signaling by Glutamate	sig	non-sig	non-sig	non-sig
CPI-CS017089111	Glutamate_byGLS_and_SLC1A3_GRM8	Homeostasis 2	Inflammation	Signaling by Glutamate	sig	non-sig	non-sig	non-sig
CPI-CS017089111	Glutamate_byGLS_and_SLC1A3_GRM8	Homeostasis 2	T cell	Signaling by Glutamate	sig	non-sig	non-sig	non-sig
CPI-CS017089111	Glutamate_byGLS_and_SLC1A3_GRM8	Homeostasis 2	MHC 1	Signaling by Glutamate	sig	non-sig	non-sig	non-sig
CPI-CS017089111	Glutamate_byGLS_and_SLC1A3_GRM8	Homeostasis 2	MHC 2	Signaling by Glutamate	sig	non-sig	non-sig	non-sig
CPI-CS017089111	Glutamate_byGLS_and_SLC1A3_GRM8	Homeostasis 2	Macrophage	Signaling by Glutamate	sig	non-sig	non-sig	non-sig
CPI-CS017089111	Glutamate_byGLS_and_SLC1A3_GRM8	Homeostasis 2	Monocyte	Signaling by Glutamate	sig	non-sig	non-sig	non-sig
CPI-CS017089111	Glutamate_byGLS_and_SLC1A3_GRM8	Homeostasis 2	Proliferation	Signaling by Glutamate	sig	non-sig	non-sig	non-sig
CPI-CS017089111	Glutamate_byGLS_and_SLC1A3_GRM8	Homeostasis 2	Tau Microglia	Signaling by Glutamate	sig	non-sig	non-sig	non-sig
CPI-CS017089111	Glutamate_byGLS_and_SLC1A3_GRM8	MHC 1	Homeostasis 2	Signaling by Glutamate	sig	non-sig	non-sig	non-sig
CPI-CS017089111	Glutamate_byGLS_and_SLC1A3_GRM8	MHC 1	Inflammation	Signaling by Glutamate	sig	non-sig	non-sig	non-sig
CPI-CS017089111	Glutamate_byGLS_and_SLC1A3_GRM8	MHC 1	T cell	Signaling by Glutamate	sig	non-sig	non-sig	non-sig
CPI-CS017089111	Glutamate_byGLS_and_SLC1A3_GRM8	Proliferation	Homeostasis 1	Signaling by Glutamate	sig	non-sig	non-sig	non-sig
CPI-CS017089111	Glutamate_byGLS_and_SLC1A3_GRM8	Proliferation	MHC 2	Signaling by Glutamate	sig	non-sig	non-sig	non-sig
CPI-SS0AE964947	GAS6_AXL	Homeostasis 1	Homeostasis 1	Signaling by Growth arrest	sig	non-sig	non-sig	non-sig
CPI-SS0AE964947	GAS6_AXL	Homeostasis 1	Homeostasis 2	Signaling by Growth arrest	sig	sig	non-sig	non-sig
CPI-SS0AE964947	GAS6_AXL	Homeostasis 2	DAM1	Signaling by Growth arrest	sig	sig	non-sig	non-sig
CPI-SS0AE964947	GAS6_AXL	Inflammation	Homeostasis 1	Signaling by Growth arrest	sig	non-sig	non-sig	non-sig
CPI-SS0AE964947	GAS6_AXL	Inflammation	Homeostasis 2	Signaling by Growth arrest	sig	non-sig	non-sig	non-sig
CPI-SS0AE964947	GAS6_AXL	Inflammation	Inflammation	Signaling by Growth arrest	sig	non-sig	non-sig	non-sig
CPI-SS0AE964947	GAS6_AXL	Inflammation	Proliferation	Signaling by Growth arrest	sig	non-sig	non-sig	non-sig
CPI-SS0AE964947	GAS6_AXL	MHC 1	Homeostasis 2	Signaling by Growth arrest	sig	non-sig	non-sig	non-sig
CPI-SS0BDA0E5E0	GAS6_TYRO3	Homeostasis 1	Homeostasis 2	Signaling by Growth arrest	sig	non-sig	non-sig	non-sig
CPI-SS0BDA0E5E0	GAS6_TYRO3	Inflammation	Homeostasis 2	Signaling by Growth arrest	sig	non-sig	non-sig	non-sig
[truncated: 750 more rows]
