# Supplementary material for: A Scalable Human Brain Cell Atlas Foundation Model Dissects the Cellular Immune Codes and Cognitive Resilience
Source: Research Square preprint supplement (doi:10.21203/rs.3.rs-6986171/v1), 2025-07-08
Supplement: Supplementary file 12 [file Supplemental_Table_S1.xlsx]

## Sheet: Brain hierarchical structure
Region	Unified name (L3)	L2	L1	Display
cerebral nuclei	Cerebral nuclei	-	Basal ganglia	Basal ganglia
substantia nigra pars compacta	Substantia nigra pars compacta	-	Basal ganglia	Basal ganglia
substantia nigra pars compacta (SNpc) of the midbrain	Substantia nigra pars compacta	-	Basal ganglia	Basal ganglia
cerebellum	Cerebellum	-	Cerebellum	Cerebellum
white matter of cerebellum	White matter of cerebellum	-	Cerebellum	Cerebellum
cerebral cortex	Cerebral cortex	-	Cerebral cortex	Cerebral cortex
BA9	Brodmann area 9	Frontal lobe	Cerebral cortex	Frontal lobe
dorsolateral prefrontal cortex	Dorsolateral prefrontal cortex	Frontal lobe	Cerebral cortex	Frontal lobe
ALS motor cortex	Motor cortex	Frontal lobe	Cerebral cortex	Frontal lobe
Orbitofrontal cortex	Orbitofrontal cortex	Frontal lobe	Cerebral cortex	Frontal lobe
Prefrontal cortex	Prefrontal cortex	Frontal lobe	Cerebral cortex	Frontal lobe
BA4	Primary motor cortex	Frontal lobe	Cerebral cortex	Frontal lobe
Brodmann (1909) area 4	Primary motor cortex	Frontal lobe	Cerebral cortex	Frontal lobe
Primary motor cortex	Primary motor cortex	Frontal lobe	Cerebral cortex	Frontal lobe
Anterior cingulate cortex	Anterior cingulate cortex	Limbic lobe	Cerebral cortex	Limbic lobe
hippocampal formation	Hippocampal formation	Limbic lobe	Cerebral cortex	Limbic lobe
occipital cortex	Occipital cortex	Occipital lobe	Cerebral cortex	Occipital lobe
occipitotemporal cortex	Occipitotemporal cortex	Occipital lobe	Cerebral cortex	Occipital lobe
Primary visual cortex	Primary visual cortex	Occipital lobe	Cerebral cortex	Occipital lobe
Angular gyrus	Angular gyrus	Parietal lobe	Cerebral cortex	Parietal lobe
Primary somatosensory cortex	Somatosensory cortex	Parietal lobe	Cerebral cortex	Parietal lobe
somatosensory cortex	Somatosensory cortex	Parietal lobe	Cerebral cortex	Parietal lobe
entorhinal cortex	Entorhinal cortex	Temporal lobe	Cerebral cortex	Temporal lobe
Middle temporal gyrus	Middle temporal gyrus	Temporal lobe	Cerebral cortex	Temporal lobe
Primary auditory cortex	Primary auditory cortex	Temporal lobe	Cerebral cortex	Temporal lobe
hypothalamus	Hypothalamus	Hypothalamus	Diencephalon	Hypothalamus
thalamic complex	Thalamic complex	Thalamus	Diencephalon	Thalamus
myelencephalon	Myelencephalon	-	Medulla	Medulla
midbrain	Midbrain	-	Midbrain	Midbrain
pons	Pons	-	Pons	Pons
cervical spinal cord white matter	Cervical spinal cord white matter	-	Spinal cord	Spinal cord
spinal cord	Spinal cord	-	Spinal cord	Spinal cord
White matter	White matter of unspecified region	-	Unspecified	Unspecified

## Sheet: Dataset2Reference
Dataset	Paper DOI	Paper Title
30747981	https://doi.org/10.1038/s41586-019-0903-2	Altered human oligodendrocyte heterogeneity in multiple sclerosis
34051145	https://doi.org/10.1016/j.neuron.2021.05.003	Resolving cellular and molecular diversity along the hippocampal anterior-to-posterior axis in humans
35513515	https://doi.org/10.1038/s41593-022-01061-1	Single-cell genomic profiling of human dopamine neurons identifies a population that selectively degenerates in Parkinson’s disease
36007006	doi: 10.1126/science.abo7257	Molecular and cellular evolution of the primate dorsolateral prefrontal cortex
37217978	https://doi.org/10.1186/s40478-023-01568-z	Brain matters: unveiling the distinct contributions of region, age, and sex to glia diversity and CNS function
37824655	DOI: 10.1126/science.adf6812	Transcriptomic cytoarchitecture reveals principles of human neocortex organization
37824663	https://doi.org/10.1126/science.add7046	Transcriptomic diversity of cell types across the adult human brain
ADRD_multiome	NA	NA
ALS_multiome	NA	NA
GSE129308	https://doi.org/10.1016/j.neuron.2022.06.021	Molecular signatures underlying neurofibrillary tangle susceptibility in Alzheimer’s disease
GSE148822	https://doi.org/10.1007/s00401-021-02263-w	Distinct amyloid‐β and tau‐associated microglia profiles in Alzheimer’s disease
GSE157827	https://doi.org/10.1073/pnas.2008762117	Single-nucleus transcriptome analysis reveals dysregulation of angiogenic endothelial cells and neuroprotective glia in Alzheimer’s disease
GSE160936	doi: 10.1007/s00401-021-02372-6	Diverse human astrocyte and microglial transcriptional responses to Alzheimer’s pathology
GSE174367	https://doi.org/10.1038/s41588-021-00894-z	Single-nucleus chromatin accessibility and transcriptomic characterization of Alzheimer’s disease
GSE243639	https://doi.org/10.1186/s13024-023-00699-0	Unravelling cell type-specific responses to Parkinson’s Disease at single cell resolution
GSE254569	https://doi.org/10.1038/s41593-024-01742-z	Single-nucleus transcriptomic profiling of human orbitofrontal cortex reveals convergent effects of aging and psychiatric disease
ROSMAP (CELL2023)	DOI: 10.1016/j.cell.2023.08.039	Single-cell atlas reveals correlates of high cognitive function, dementia, and resilience to Alzheimer’s disease pathology
ROSMAP (NATURE2024)	https://doi.org/10.1038/s41586-024-07871-6	Cellular communities reveal trajectories of brain ageing and Alzheimer’s disease
SEA-AD (DLPFC)	NA	NA
SEA-AD (MTG)	https://doi.org/10.1038/s41593-024-01774-5	Integrated multimodal cell atlas of Alzheimer’s disease
Syn51105515	https://doi.org/10.1016/j.cell.2024.02.031	Single-cell dissection of the human motor and prefrontal cortices in ALS and FTLD

## Sheet: Evaluation_Level1
Syn51105515				SEA-AD (MTG)				GSE129308 [Original Labels NA]
Cell Type	Precision	Recall		Cell Type	Precision	Recall
Astrocyte	0.999	0.999		Astrocyte	0.999	0.999
Immune	0.999	0.999		Immune	0.999	0.998
Neuron	0.999	0.999		Neuron	0.999	0.999
OPC	0.999	0.999		OPC	0.999	0.991
Oligodendrocyte	0.999	1		Oligodendrocyte	0.997	0.999
Others	0.999	0.998		Others	0.991	0.996
35513515				34051145				GSE148822 [Original Labels NA]
Cell Type	Precision	Recall		Cell Type	Precision	Recall
Astrocyte	0.999	0.992		Astrocyte	0.994	0.913
Immune	0.999	0.999		Immune	0.986	0.745
Neuron	0.994	0.998		Neuron	0.83	0.967
OPC	0.999	0.96		OPC	0.987	0.906
Oligodendrocyte	0.999	0.999		Oligodendrocyte	0.902	0.967
Others	0.976	0.998		Others	0.997	0.436
36007006				30747918				GSE157827 [Original Labels NA]
Cell Type	Precision	Recall		Cell Type	Precision	Recall
Astrocyte	0.999	1		Astrocyte	0.984	0.797
Immune	1	1		Immune	0.936	0.858
Neuron	0.999	1		Neuron	0.989	0.975
OPC	1	0.993		OPC	0.99	0.798
Oligodendrocyte	0.997	1		Oligodendrocyte	0.946	0.994
Others	1	0.998		Others	0.964	0.98
37217978				ALS multiome				GSE160936 [Original Labels NA]
Cell Type	Precision	Recall		Cell Type	Precision	Recall
Astrocyte	0.994	0.924		Astrocyte	0.99	0.933
Immune	0.996	0.983		Immune	0.998	0.795
Neuron	0.998	0.993		Neuron	0.988	0.793
OPC	0.945	0.996		OPC	0.998	0.907
Oligodendrocyte	0.984	0.988		Oligodendrocyte	0.979	0.999
Others	0.965	0.988		Others	0.956	0.849
ROSMAP (CELL 2023)				37824655 (Reference)				GSE174367 [Original Labels NA]
Cell Type	Precision	Recall
Astrocyte	0.999	0.988
Immune	0.999	0.999
Neuron	0.999	0.999
OPC	0.999	0.999
Oligodendrocyte	0.998	0.999
Others	0.912	0.995
ROSMAP (NATURE 2024)				37824663 (Reference)				GSE243639 [Original Labels NA]
Cell Type	Precision	Recall
Astrocyte	0.999	0.999
Immune	0.997	0.999
Neuron	0.999	0.999
OPC	0.999	0.978
Oligodendrocyte	0.996	0.999
Others	0.998	0.988
SEA-AD (DLPFC)				ADRD_multiome [Original Labels NA)				GSE254569 [Original Labels NA]
Cell Type	Precision	Recall
Astrocyte	0.999	0.999
Immune	1	0.991
Neuron	0.999	0.999
OPC	0.999	0.994
Oligodendrocyte	0.998	0.999
Others	0.997	0.989

## Sheet: Evaluation_Level2 (Neuron)
ROSMAP (CELL 2023)				ROSMAP (NATURE 2024)
Cell Type	Precision	Recall		Cell Type	Precision	Recall
Glutamatergic excitatory	0.999	0.999		Glutamatergic excitatory	0.999	0.999
GABAergic inhibitory	0.999	0.994		GABAergic inhibitory	0.999	0.996
35513515				36007006
Cell Type	Precision	Recall		Cell Type	Precision	Recall
Dopaminergic neuron	0.944	0.986		Glutamatergic excitatory	0.999	1
				GABAergic inhibitory	1	0.998
37824655
Cell Type	Precision	Recall		30747918 (Original Neuron Level 2 Labels NA)
Glutamatergic excitatory	0.999	0.999
GABAergic inhibitory	0.999	0.997		34051145 (Original Neuron Level 2 Labels NA)
Syn51105515				37217978 (Original Neuron Level 2 Labels NA)
Cell Type	Precision	Recall
Glutamatergic excitatory	0.999	0.999		ADRD multiome (Original Neuron Level 2 Labels NA)
GABAergic inhibitory	0.999	0.997
				ALS multiome (Original Neuron Level 2 Labels NA)
SEA-AD (MTG)
Cell Type	Precision	Recall		GSE129308 (Original Neuron Level 2 Labels NA)
Glutamatergic excitatory	0.999	0.999
GABAergic inhibitory	0.999	0.997		GSE148822 (Original Neuron Level 2 Labels NA)
SEA-AD (DLPFC)				GSE157827 (Original Neuron Level 2 Labels NA)
Cell Type	Precision	Recall
Glutamatergic excitatory	0.999	0.999		GSE160936 (Original Neuron Level 2 Labels NA)
GABAergic inhibitory	0.999	0.995
				GSE174367 (Original Neuron Level 2 Labels NA)
37824663
Cell Type	Precision	Recall		GSE243639 (Original Neuron Level 2 Labels NA)
Amygdala excitatory	0.934	0.944
Cerebellar inhibitory	0.998	0.995		GSE254569 (Original Neuron Level 2 Labels NA)
Eccentric medium spiny neuron	0.998	0.981
GABAergic inhibitory	0.997	0.998
Hippocampal CA1-3	0.997	0.983
Hippocampal CA4	0.999	0.988
Hippocampal dentate gyrus	0.999	0.988
Lower rhombic lip	0.999	0.999
Mammillary body	0.998	0.983
Medium spiny neuron	0.999	0.964
Midbrain-derived inhibitory	0.999	0.999
Splatter	0.955	0.989
Thalamic excitatory	0.999	0.986
Upper rhombic lip	0.999	0.995

## Sheet: Evaluation_Level3 (Neuron)
GEO ID: 37824655
Cell Type	Precision	Recall
Glutamatergic excitatory
L2/3 IT	0.994	0.991
L4 IT	0.979	0.987
L5 ET	1	0.206
L5 IT	0.951	0.998
L5/6 NP	0.999	0.999
L6 CT	0.999	0.999
L6 IT	0.998	0.989
L6 IT Car3	0.999	0.994
L6b	0.998	0.999
GABAergic inhibitory
Chandelier	0.999	0.999
Lamp5	0.994	0.999
Lamp5 Lhx6	0.999	0.999
Pax6	0.996	0.995
Pvalb	0.998	0.997
Sncg	0.996	0.987
Sst	0.997	0.998
Sst Chodl	1	0.028
Vip	0.999	0.999
SEA-AD_MTG
Cell Type	Precision	Recall
Glutamatergic excitatory
L2/3 IT	0.983	0.998
L4 IT	0.994	0.868
L5 ET	1	0.451
L5 IT	0.862	0.988
L5/6 NP	0.999	0.999
L6 CT	0.999	0.989
L6 IT	0.982	0.986
L6 IT Car3	0.996	0.999
L6b	0.988	0.999
GABAergic inhibitory
Chandelier	0.999	0.999
Lamp5	0.997	0.957
Lamp5 Lhx6	0.999	0.999
Pax6	0.94	0.992
Pvalb	0.999	0.931
Sncg	0.902	0.982
Sst	0.886	0.999
Sst Chodl	1	0.002
Vip	0.999	0.992
SEA-AD_DLPFC
Cell Type	Precision	Recall
Glutamatergic excitatory
L2/3 IT	0.958	0.999
L4 IT	0.986	0.684
L5 ET	1	0.353
L5 IT	0.874	0.992
L5/6 NP	0.998	0.999
L6 CT	0.999	0.994
L6 IT	0.993	0.991
L6 IT Car3	0.996	0.998
L6b	0.992	0.998
GABAergic inhibitory
Chandelier	0.999	0.999
Lamp5	0.999	0.947
Lamp5 Lhx6	0.999	0.999
Pax6	0.921	0.966
Pvalb	0.999	0.928
Sncg	0.869	0.986
Sst	0.895	0.999
Sst Chodl	1	0.005
Vip	0.999	0.987

## Sheet: Evaluation_Level2 (Immune)
GEO ID: 30747918				ALS multiome				GSE129308 [Original Labels NA]
Cell Type	Precision	Recall		Cell Type	Precision	Recall
Leukocyte_T cell	0.959	0.947		Leukocyte_T cell	NA	NA
Microglia_Macrophage	0.914	0.992		Microglia_Macrophage	0.999	0.955
34051145				Syn51105515				GSE148822 [Original Labels NA]
Cell Type	Precision	Recall		Cell Type	Precision	Recall
Leukocyte_T cell	NA	NA		Leukocyte_T cell	0.982	1
Microglia_Macrophage	0.987	0.997		Microglia_Macrophage	0.999	0.999
ROSMAP (CELL 2023)				37824663				GSE157827 [Original Labels NA]
Cell Type	Precision	Recall		Cell Type	Precision	Recall
Leukocyte_T cell	0.026	0.022		Leukocyte_T cell	0.975	0.876
Microglia_Macrophage	0.969	0.975		Microglia_Macrophage	0.995	0.999
37217978				37824655				GSE160936 [Original Labels NA]
Cell Type	Precision	Recall		Cell Type	Precision	Recall
Leukocyte_T cell	0.988	1		Leukocyte_T cell	NA	NA
Microglia_Macrophage	0.997	0.999		Microglia_Macrophage	1	0.999
36007006				ROSMAP (NATURE 2024)				GSE174367 [Original Labels NA]
Cell Type	Precision	Recall		Cell Type	Precision	Recall
Leukocyte_T cell	0.981	1		Leukocyte_T cell	NA	NA
Microglia_Macrophage	0.998	0.999		Microglia_Macrophage	0.999	0.999
SEA-AD_MTG				SEA-AD_DLPFC				GSE243639 [Original Labels NA]
Cell Type	Precision	Recall		Cell Type	Precision	Recall
Leukocyte_T cell	NA	NA		Leukocyte_T cell	NA	NA
Microglia_Macrophage	0.999	0.979		Microglia_Macrophage	1	0.982
35513515				ADRD_multiome [Original Labels NA)				GSE254569 [Original Labels NA]
Cell Type	Precision	Recall
Leukocyte_T cell	NA	NA
Microglia_Macrophage	0.999	0.999
								GSE243639 [Original Labels NA]
								GSE254569 [Original Labels NA]

## Sheet: Immune_Level3
L3_label	30747918	34051145	35513515	36007006	37217978	37824655	37824663	ADRD_multiome	ALS_multiome	GSE129308	GSE148822	GSE157827	GSE160936	GSE174367	GSE243639	GSE254569	ROSMAP_CELL2023	ROSMAP_NATURE2024b	SEA-AD_DLPFC	SEA-AD_MTG	Syn51105515
DAM1	45	42	376	386	175	177	1743	774	209	0	43280	1039	2730	745	3064	481	14315	11663	4280	4383	3995
DAM2	18	5	28891	2	16	2	72	12	5	0	47	4	20	4	142	0	38	26	57	84	55
Homeostasis Microglia1	23	285	319	5706	92	8622	11194	1252	627	1	27271	2562	14896	1111	2740	32211	28285	49852	16657	14142	15037
Homeostasis Microglia2	36	17	27	441	2906	1305	71953	88	297	0	2650	34	233	116	251	155	901	785	335	510	695
Inflammation Microglia	0	0	9	5	0	0	14	5	0	0	5680	12	112	11	39	24	210	173	70	91	17
MHC Microglia1	28	19	132	44	33	22	67	418	70	0	13504	940	577	518	3300	495	12545	8436	2953	3642	3942
MHC Microglia2	96	1	11	12	27	1	25	21	29	0	38	52	49	4	7665	31	459	51	36	15	11
MHC Microglia3	0	0	4	1	93	0	520	0	0	0	0	0	13	0	0	1	2	2	21	12	4
Macrophage	19	46	1114	392	132	6	3634	123	92	0	9263	76	559	214	578	1696	2625	2513	928	1106	108
Monocyte	49	2	7	18	14	0	382	44	7	0	1255	13	132	10	82	134	333	771	289	258	2
Proliferation Microglia	0	0	14	2	5	4	66	35	3	1	566	59	251	27	106	264	763	1132	564	369	773
Tau Microglia	3	60	259	351	171	470	1832	367	47	0	81907	868	3809	970	1758	545	17643	6987	1093	1647	1191
Unknown Microglia1	51	11125	18	27	30	67	78	948	98	0	559	836	4849	201	280	533	1810	1644	11972	11542	1790
Unknown Microglia2	16	35	3	1	13	33	32	73	27	0	850	72	537	5	107	495	26	73	31	62	9
Unknown Microglia3	0	0	1586	0	0	0	0	1	1	0	0	0	2	0	0	0	4	2	2	1	3

## Sheet: Sample_Meta
SampleID	Dataset	DonorID	Group	Sex	BrainRegion
10X382_7	37824663	10X382_7	Normal	Male	Medulla
H21.33.016_10x 3' v3	SEA-AD_DLPFC	H21.33.016_10x 3' v3	PART	Female	Frontal lobe
H20.33.008_10x 3' v3	SEA-AD_DLPFC	H20.33.008_10x 3' v3	AD	Female	Frontal lobe
H20.33.011_10x multiome	SEA-AD_DLPFC	H20.33.011_10x multiome	AD	Female	Frontal lobe
G9	ADRD_multiome	G9	Lewy body dementia	Male	Cerebellum
R7295303	ROSMAP_CELL2023	R7295303	Resilience	Female	Frontal lobe
R8725848	ROSMAP_NATURE2024b	R8725848	Normal	Female	Frontal lobe
R7295303	ROSMAP_NATURE2024b	R7295303	Resilience	Female	Frontal lobe
10X146_3	37824663	10X146_3	Normal	Male	Cerebral cortex
H19.30.002_V1	37824655	H19.30.002_V1	Normal	Male	Occipital lobe
R6478102	ROSMAP_NATURE2024b	R6478102	AD	Female	Frontal lobe
R9907075	ROSMAP_CELL2023	R9907075	Normal	Male	Frontal lobe
R9426782	ROSMAP_CELL2023	R9426782	AD	Male	Frontal lobe
s.0120	GSE243639	s.0120	Parkinson's disease	Female	Basal ganglia
10X270_5	37824663	10X270_5	Normal	Male	Cerebral cortex
H20.33.039_10x multiome	SEA-AD_DLPFC	H20.33.039_10x multiome	AD	Female	Frontal lobe
H18.30.002_ACC	37824655	H18.30.002_ACC	Normal	Male	Limbic lobe
AD8	GSE157827	AD8	AD	Male	Frontal lobe
s63	GSE254569	s63	Schizophrenia	Male	Frontal lobe
R2554598	ROSMAP_CELL2023	R2554598	Normal	Male	Frontal lobe
R9818080	ROSMAP_CELL2023	R9818080	Normal	Male	Frontal lobe
01cfc751-54c4-44d6-838d-82dd9ac93917	37217978	01cfc751-54c4-44d6-838d-82dd9ac93917	Normal	Male	Cerebellum
H20.33.018_10x 3' v3	SEA-AD_MTG	H20.33.018_10x 3' v3	AD	Female	Temporal lobe
10X176_8	37824663	10X176_8	Normal	Male	Cerebral cortex
191113_FTLD_209_snRNA-D6	Syn51105515	191113_FTLD_209_snRNA-D6	Frontotemporal lobar degeneration	Female	Frontal lobe
R4817881	ROSMAP_CELL2023	R4817881	AD	Male	Frontal lobe
R5789564	ROSMAP_NATURE2024b	R5789564	AD	Female	Frontal lobe
R9354381	ROSMAP_NATURE2024b	R9354381	AD	Female	Frontal lobe
R4900012	ROSMAP_NATURE2024b	R4900012	AD	Female	Frontal lobe
10X230_8	37824663	10X230_8	Normal	Male	Limbic lobe
210526_FTLD_210_snRNA-B10	Syn51105515	210526_FTLD_210_snRNA-B10	Frontotemporal lobar degeneration	Female	Frontal lobe
10X353_5	37824663	10X353_5	Normal	Male	Basal ganglia
R7874995	ROSMAP_NATURE2024b	R7874995	Normal	Female	Frontal lobe
H200.1023_S1	37824655	H200.1023_S1	Normal	Female	Parietal lobe
R4379962	ROSMAP_NATURE2024b	R4379962	AD	Male	Frontal lobe
H20.33.037_10x 3' v3	SEA-AD_MTG	H20.33.037_10x 3' v3	AD	Female	Temporal lobe
R1214999	ROSMAP_NATURE2024b	R1214999	Normal	Male	Frontal lobe
10X360_5	37824663	10X360_5	Normal	Male	Pons
R8130934	ROSMAP_CELL2023	R8130934	PART	Female	Frontal lobe
4560	35513515	4560	Parkinson's disease	Female	Basal ganglia
R5656511	ROSMAP_CELL2023	R5656511	Normal	Female	Frontal lobe
R8971831	ROSMAP_NATURE2024b	R8971831	AD	Male	Frontal lobe
10X227_5	37824663	10X227_5	Normal	Male	Cerebral cortex
200721_FTLD_214_snRNA-A12	Syn51105515	200721_FTLD_214_snRNA-A12	Frontotemporal lobar degeneration	Female	Frontal lobe
H21.33.003_10x 3' v3	SEA-AD_DLPFC	H21.33.003_10x 3' v3	Normal	Male	Frontal lobe
R1609849	ROSMAP_CELL2023	R1609849	AD	Female	Frontal lobe
10X388_6	37824663	10X388_6	Normal	Male	Limbic lobe
10X357_6	37824663	10X357_6	Normal	Male	Thalamus
10X385_6	37824663	10X385_6	Normal	Male	Thalamus
210526_ALS_108_snRNA-H10	Syn51105515	210526_ALS_108_snRNA-H10	Amyotrophic lateral sclerosis	Female	Frontal lobe
R6253512	ROSMAP_CELL2023	R6253512	AD	Female	Frontal lobe
R9309271	ROSMAP_NATURE2024b	R9309271	AD	Female	Frontal lobe
R1977848	ROSMAP_CELL2023	R1977848	AD	Male	Frontal lobe
AD-MAP2-1	GSE129308	AD-MAP2-1	AD	Female	Frontal lobe
R5629689	ROSMAP_CELL2023	R5629689	AD	Female	Frontal lobe
CTRL-8	GSE129308	CTRL-8	Normal	Male	Frontal lobe
10X379_8	37824663	10X379_8	Normal	Male	Cerebral cortex
10X319_7	37824663	10X319_7	Normal	Male	Basal ganglia
10X205_2	37824663	10X205_2	Normal	Male	Medulla
10X194_1	37824663	10X194_1	Normal	Male	Basal ganglia
R6679530	ROSMAP_CELL2023	R6679530	PART	Female	Frontal lobe
H21.33.032_10x 3' v3	SEA-AD_DLPFC	H21.33.032_10x 3' v3	Normal	Female	Frontal lobe
H20.33.027_10x 3' v3	SEA-AD_MTG	H20.33.027_10x 3' v3	AD	Female	Temporal lobe
A19-224	ADRD_multiome	A19-224	AD	Female	Cerebellum
H19.30.001_V1	37824655	H19.30.001_V1	Normal	Male	Occipital lobe
R7063792	ROSMAP_NATURE2024b	R7063792	Normal	Female	Frontal lobe
s44	GSE254569	s44	Clinical depression	Male	Frontal lobe
b1650021-da2c-4932-ba3d-d44930e8d19b	37217978	b1650021-da2c-4932-ba3d-d44930e8d19b	Normal	Female	Cerebellum
R7286984	ROSMAP_CELL2023	R7286984	Normal	Male	Frontal lobe
191113_FTLD_226_snRNA-E4	Syn51105515	191113_FTLD_226_snRNA-E4	Frontotemporal lobar degeneration	Male	Frontal lobe
A297/16 EC	GSE160936	A297/16 EC	Normal	Male	Temporal lobe
R4917253	ROSMAP_NATURE2024b	R4917253	AD	Female	Frontal lobe
10X206_7	37824663	10X206_7	Normal	Male	Limbic lobe
R3553915	ROSMAP_CELL2023	R3553915	AD	Female	Frontal lobe
9a85bd8c-402e-415d-8b49-a56c08be23ba	37217978	9a85bd8c-402e-415d-8b49-a56c08be23ba	Normal	Male	Spinal cord
10X219_1	37824663	10X219_1	Normal	Male	Basal ganglia
10X318_4	37824663	10X318_4	Normal	Male	Basal ganglia
10X380_8	37824663	10X380_8	Normal	Male	Hypothalamus
R6751504	ROSMAP_CELL2023	R6751504	Normal	Female	Frontal lobe
10X203_7	37824663	10X203_7	Normal	Male	Hypothalamus
R9419876	ROSMAP_NATURE2024b	R9419876	PART	Male	Frontal lobe
R3825485	ROSMAP_CELL2023	R3825485	Normal	Female	Frontal lobe
10X359_5	37824663	10X359_5	Normal	Male	Pons
10X349_1	37824663	10X349_1	Normal	Male	Cerebral cortex
R3722356	ROSMAP_CELL2023	R3722356	AD	Male	Frontal lobe
R2565200	ROSMAP_NATURE2024b	R2565200	AD	Female	Frontal lobe
H21.33.020_10x 3' v3	SEA-AD_DLPFC	H21.33.020_10x 3' v3	AD	Male	Frontal lobe
R8882846	ROSMAP_NATURE2024b	R8882846	AD	Female	Frontal lobe
Donor3OC	GSE148822	Donor3OC	Normal	Female	Occipital lobe
10X264_1	37824663	10X264_1	Normal	Male	Cerebral cortex
10X376_4	37824663	10X376_4	Normal	Male	Cerebral cortex
H21.33.023_10x 3' v3	SEA-AD_DLPFC	H21.33.023_10x 3' v3	PART	Male	Frontal lobe
R9557117	ROSMAP_CELL2023	R9557117	AD	Female	Frontal lobe
R9936070	ROSMAP_CELL2023	R9936070	Normal	Male	Frontal lobe
R4637403	ROSMAP_CELL2023	R4637403	AD	Male	Frontal lobe
10X218_2	37824663	10X218_2	Normal	Male	Spinal cord
10X146_7	37824663	10X146_7	Normal	Male	Cerebral cortex
R3257830	ROSMAP_CELL2023	R3257830	AD	Male	Frontal lobe
Case76_posterior	34051145	Case76_posterior	Epilepsy	Male	Limbic lobe
H21.33.001_10x multiome	SEA-AD_DLPFC	H21.33.001_10x multiome	PART	Male	Frontal lobe
R4956716	ROSMAP_CELL2023	R4956716	Normal	Female	Frontal lobe
R7090624	ROSMAP_CELL2023	R7090624	Resilience	Female	Frontal lobe
s56	GSE254569	s56	Normal	Male	Frontal lobe
2af6eb56-81ea-46cf-90a4-64f317255094	37217978	2af6eb56-81ea-46cf-90a4-64f317255094	Normal	Female	Frontal lobe
A053/11 EC	GSE160936	A053/11 EC	Normal	Male	Temporal lobe
R5053212	ROSMAP_CELL2023	R5053212	AD	Male	Frontal lobe
R5647192	ROSMAP_CELL2023	R5647192	Normal	Male	Frontal lobe
R6849345	ROSMAP_NATURE2024b	R6849345	AD	Female	Frontal lobe
s28	GSE254569	s28	Normal	Male	Frontal lobe
R9254464	ROSMAP_CELL2023	R9254464	AD	Female	Frontal lobe
R6913259	ROSMAP_NATURE2024b	R6913259	Resilience	Female	Frontal lobe
10X379_7	37824663	10X379_7	Normal	Male	Cerebral cortex
R8113560	ROSMAP_CELL2023	R8113560	PART	Female	Frontal lobe
R3769291	ROSMAP_NATURE2024b	R3769291	Normal	Male	Frontal lobe
10X380_1	37824663	10X380_1	Normal	Male	Cerebral cortex
R8044591	ROSMAP_NATURE2024b	R8044591	Normal	Female	Frontal lobe
R1830086	ROSMAP_CELL2023	R1830086	AD	Male	Frontal lobe
R6759986	ROSMAP_NATURE2024b	R6759986	AD	Female	Frontal lobe
R9996478	ROSMAP_NATURE2024b	R9996478	AD	Female	Frontal lobe
NC18	GSE157827	NC18	Normal	Female	Frontal lobe
Donor18OC	GSE148822	Donor18OC	AD	Male	Occipital lobe
10X378_5	37824663	10X378_5	Normal	Male	Midbrain
H20.33.002_10x 3' v3	SEA-AD_MTG	H20.33.002_10x 3' v3	PART	Female	Temporal lobe
210526_PN_303_snRNA-D9	Syn51105515	210526_PN_303_snRNA-D9	Normal	Female	Frontal lobe
R7978618	ROSMAP_NATURE2024b	R7978618	Resilience	Female	Frontal lobe
10X393_6	37824663	10X393_6	Normal	Male	Cerebellum
2d449ac4-e6d8-4463-bf30-b130fe483ea0	37217978	2d449ac4-e6d8-4463-bf30-b130fe483ea0	Normal	Male	Frontal lobe
H20.33.004_10x multiome	SEA-AD_MTG	H20.33.004_10x multiome	AD	Male	Temporal lobe
H20.33.012_10x 3' v3	SEA-AD_DLPFC	H20.33.012_10x 3' v3	PART	Female	Frontal lobe
R5533791	ROSMAP_CELL2023	R5533791	PART	Female	Frontal lobe
R1042011	ROSMAP_NATURE2024b	R1042011	PART	Female	Frontal lobe
10X227_2	37824663	10X227_2	Normal	Male	Pons
ca13e1b5-1eec-4757-ab65-40fc610c372b	37217978	ca13e1b5-1eec-4757-ab65-40fc610c372b	Normal	Female	Spinal cord
A319/11 SSC	GSE160936	A319/11 SSC	Normal	Male	Parietal lobe
H20.33.025_10x multiome	SEA-AD_DLPFC	H20.33.025_10x multiome	AD	Male	Frontal lobe
10X192_4	37824663	10X192_4	Normal	Male	Limbic lobe
R2881301	ROSMAP_CELL2023	R2881301	PART	Male	Frontal lobe
H18.30.001_A1	37824655	H18.30.001_A1	Normal	Female	Temporal lobe
s8	GSE254569	s8	Schizophrenia	Male	Frontal lobe
R5883172	ROSMAP_NATURE2024b	R5883172	Normal	Female	Frontal lobe
A127/11 SSC	GSE160936	A127/11 SSC	Normal	Male	Parietal lobe
10X349_6	37824663	10X349_6	Normal	Male	Cerebral cortex
R1105988	ROSMAP_NATURE2024b	R1105988	Resilience	Female	Frontal lobe
10X393_1	37824663	10X393_1	Normal	Male	Thalamus
10X175_2	37824663	10X175_2	Normal	Male	Cerebral cortex
R5541746	ROSMAP_NATURE2024b	R5541746	PART	Female	Frontal lobe
H21.33.012_10x 3' v3	SEA-AD_MTG	H21.33.012_10x 3' v3	AD	Female	Temporal lobe
R1538032	ROSMAP_NATURE2024b	R1538032	AD	Female	Frontal lobe
s.0131	GSE243639	s.0131	Normal	Male	Basal ganglia
R4078277	ROSMAP_CELL2023	R4078277	AD	Male	Frontal lobe
R4935546	ROSMAP_CELL2023	R4935546	Normal	Female	Frontal lobe
H19.30.001_MTG	37824655	H19.30.001_MTG	Normal	Male	Temporal lobe
10X190_8	37824663	10X190_8	Normal	Male	Basal ganglia
R1721075	ROSMAP_NATURE2024b	R1721075	Resilience	Male	Frontal lobe
R7288382	ROSMAP_CELL2023	R7288382	PART	Female	Frontal lobe
s16	GSE254569	s16	Normal	Male	Frontal lobe
R5693901	ROSMAP_CELL2023	R5693901	AD	Male	Frontal lobe
CTRL-5	GSE129308	CTRL-5	Normal	Male	Frontal lobe
PDC026 EC	GSE160936	PDC026 EC	Normal	Female	Temporal lobe
AD-MAP2-8	GSE129308	AD-MAP2-8	AD	Female	Frontal lobe
R9809441	ROSMAP_NATURE2024b	R9809441	AD	Female	Frontal lobe
R5447358	ROSMAP_CELL2023	R5447358	PART	Female	Frontal lobe
10X318_5	37824663	10X318_5	Normal	Male	Basal ganglia
10X362_1	37824663	10X362_1	Normal	Male	Thalamus
R9176076	ROSMAP_CELL2023	R9176076	AD	Female	Frontal lobe
R3328867	ROSMAP_CELL2023	R3328867	Normal	Male	Frontal lobe
R2167020	ROSMAP_NATURE2024b	R2167020	AD	Male	Frontal lobe
R5816648	ROSMAP_CELL2023	R5816648	PART	Male	Frontal lobe
R5138383	ROSMAP_NATURE2024b	R5138383	AD	Female	Frontal lobe
R4184741	ROSMAP_CELL2023	R4184741	PART	Male	Frontal lobe
4775	35513515	4775	Lewy body dementia	Male	Basal ganglia
10X329_7	37824663	10X329_7	Normal	Male	Cerebral cortex
10X319_1	37824663	10X319_1	Normal	Male	Basal ganglia
R3917022	ROSMAP_CELL2023	R3917022	PART	Male	Frontal lobe
R6346298	ROSMAP_NATURE2024b	R6346298	PART	Female	Frontal lobe
AD-AT8-2	GSE129308	AD-AT8-2	AD	Male	Frontal lobe
s20	GSE254569	s20	Schizophrenia	Female	Frontal lobe
R8054504	ROSMAP_CELL2023	R8054504	Resilience	Male	Frontal lobe
475db6a2-f650-42b1-9d19-051bbb1449ab	37217978	475db6a2-f650-42b1-9d19-051bbb1449ab	Normal	Female	Cerebellum
AD-AT8-1	GSE129308	AD-AT8-1	AD	Female	Frontal lobe
10X329_6	37824663	10X329_6	Normal	Male	Basal ganglia
R2081705	ROSMAP_CELL2023	R2081705	PART	Male	Frontal lobe
R8072902	ROSMAP_CELL2023	R8072902	AD	Female	Frontal lobe
10X349_5	37824663	10X349_5	Normal	Male	Cerebral cortex
10X224_2	37824663	10X224_2	Normal	Male	Limbic lobe
Sample-58	GSE174367	Sample-58	Normal	Male	Frontal lobe
R5259690	ROSMAP_CELL2023	R5259690	PART	Male	Frontal lobe
R1103580	ROSMAP_NATURE2024b	R1103580	AD	Female	Frontal lobe
0e323fc8-8e39-4871-b1bc-f2a5ecb6ece8	37217978	0e323fc8-8e39-4871-b1bc-f2a5ecb6ece8	Normal	Female	Frontal lobe
78975f2c-a1e1-42d8-a7aa-275d0b970c7a	37217978	78975f2c-a1e1-42d8-a7aa-275d0b970c7a	Normal	Female	Cerebellum
201019_ALS_104_snRNA-B4	Syn51105515	201019_ALS_104_snRNA-B4	Amyotrophic lateral sclerosis	Female	Frontal lobe
10X159_6	37824663	10X159_6	Normal	Male	Cerebral cortex
191112_ALS_117_snRNA-C3	Syn51105515	191112_ALS_117_snRNA-C3	Amyotrophic lateral sclerosis	Male	Frontal lobe
10X159_4	37824663	10X159_4	Normal	Female	Cerebral cortex
10X381_5	37824663	10X381_5	Normal	Male	Cerebral cortex
R9239503	ROSMAP_CELL2023	R9239503	AD	Female	Frontal lobe
s.0100	GSE243639	s.0100	Parkinson's disease	Male	Basal ganglia
10X383_5	37824663	10X383_5	Normal	Male	Medulla
10X376_5	37824663	10X376_5	Normal	Male	Hypothalamus
H200.1023_ACC	37824655	H200.1023_ACC	Normal	Female	Limbic lobe
10X249_5	37824663	10X249_5	Normal	Male	Cerebral cortex
10X269_5	37824663	10X269_5	Normal	Male	Cerebral cortex
R3769291	ROSMAP_CELL2023	R3769291	Normal	Male	Frontal lobe
R8477425	ROSMAP_CELL2023	R8477425	PART	Male	Frontal lobe
10X160_6	37824663	10X160_6	Normal	Female	Cerebral cortex
10X391_3	37824663	10X391_3	Normal	Male	Thalamus
R1977848	ROSMAP_NATURE2024b	R1977848	AD	Male	Frontal lobe
R3121235	ROSMAP_NATURE2024b	R3121235	PART	Female	Frontal lobe
R8044591	ROSMAP_CELL2023	R8044591	Normal	Female	Frontal lobe
R9810713	ROSMAP_CELL2023	R9810713	Resilience	Male	Frontal lobe
R4470253	ROSMAP_NATURE2024b	R4470253	Resilience	Male	Frontal lobe
s6	GSE254569	s6	Normal	Female	Frontal lobe
H21.33.002_10x 3' v3	SEA-AD_MTG	H21.33.002_10x 3' v3	AD	Female	Temporal lobe
R3631183	ROSMAP_NATURE2024b	R3631183	AD	Female	Frontal lobe
R3741788	ROSMAP_CELL2023	R3741788	Resilience	Male	Frontal lobe
R5766881	ROSMAP_NATURE2024b	R5766881	AD	Female	Frontal lobe
191113_FTLD_202_snRNA-D3	Syn51105515	191113_FTLD_202_snRNA-D3	Frontotemporal lobar degeneration	Female	Frontal lobe
AD-MAP2-7	GSE129308	AD-MAP2-7	AD	Female	Frontal lobe
Donor14OC	GSE148822	Donor14OC	AD	Female	Occipital lobe
10X350_1	37824663	10X350_1	Normal	Male	Cerebellum
H21.33.031_10x 3' v3	SEA-AD_DLPFC	H21.33.031_10x 3' v3	AD	Male	Frontal lobe
10X376_6	37824663	10X376_6	Normal	Male	Hypothalamus
s65	GSE254569	s65	Normal	Male	Frontal lobe
R2992930	ROSMAP_CELL2023	R2992930	AD	Male	Frontal lobe
210526_FTLD_235_snRNA-D1	Syn51105515	210526_FTLD_235_snRNA-D1	Frontotemporal lobar degeneration	Male	Frontal lobe
R5629689	ROSMAP_NATURE2024b	R5629689	AD	Female	Frontal lobe
A21-142	ADRD_multiome	A21-142	AD	Female	Cerebellum
10X194_4	37824663	10X194_4	Normal	Male	Midbrain
10X383_7	37824663	10X383_7	Normal	Male	Thalamus
R6108690	ROSMAP_NATURE2024b	R6108690	PART	Female	Frontal lobe
H19.30.001_ANG	37824655	H19.30.001_ANG	Normal	Male	Parietal lobe
R1218460	ROSMAP_NATURE2024b	R1218460	PART	Female	Frontal lobe
R1801421	ROSMAP_CELL2023	R1801421	AD	Male	Frontal lobe
R4053976	ROSMAP_NATURE2024b	R4053976	AD	Female	Frontal lobe
R9101940	ROSMAP_CELL2023	R9101940	Normal	Female	Frontal lobe
10X182_5	37824663	10X182_5	Normal	Male	Basal ganglia
Sample-37	GSE174367	Sample-37	AD	Female	Frontal lobe
201019_PN_311_snRNA-B8	Syn51105515	201019_PN_311_snRNA-B8	Normal	Female	Frontal lobe
R2667630	ROSMAP_NATURE2024b	R2667630	AD	Male	Frontal lobe
AD4	GSE157827	AD4	AD	Female	Frontal lobe
G15	ADRD_multiome	G15	Normal	Female	Cerebellum
R2787688	ROSMAP_NATURE2024b	R2787688	Resilience	Female	Frontal lobe
R8293796	ROSMAP_CELL2023	R8293796	Normal	Female	Frontal lobe
10X216_1	37824663	10X216_1	Normal	Male	Cerebral cortex
R9652199	ROSMAP_NATURE2024b	R9652199	Resilience	Female	Frontal lobe
10X376_1	37824663	10X376_1	Normal	Male	Midbrain
R6352950	ROSMAP_CELL2023	R6352950	AD	Female	Frontal lobe
10X230_1	37824663	10X230_1	Normal	Male	Midbrain
7519574d-41f0-4526-89e5-ce89b98344b0	37217978	7519574d-41f0-4526-89e5-ce89b98344b0	Normal	Male	Spinal cord
10X330_3	37824663	10X330_3	Normal	Male	Basal ganglia
R4292728	ROSMAP_NATURE2024b	R4292728	PART	Male	Frontal lobe
R7095349	ROSMAP_NATURE2024b	R7095349	AD	Female	Frontal lobe
R3292822	ROSMAP_CELL2023	R3292822	Resilience	Female	Frontal lobe
R3978789	ROSMAP_NATURE2024b	R3978789	PART	Female	Frontal lobe
H21.33.013_10x 3' v3	SEA-AD_MTG	H21.33.013_10x 3' v3	AD	Female	Temporal lobe
MS242	30747918	MS242	Multiple sclerosis	Male	Unspecified
R6003498	ROSMAP_NATURE2024b	R6003498	PART	Female	Frontal lobe
R4928630	ROSMAP_NATURE2024b	R4928630	Normal	Male	Frontal lobe
R6292415	ROSMAP_NATURE2024b	R6292415	PART	Female	Frontal lobe
10X174_8	37824663	10X174_8	Normal	Male	Cerebral cortex
10X248_4	37824663	10X248_4	Normal	Male	Cerebral cortex
R8125311	ROSMAP_NATURE2024b	R8125311	PART	Male	Frontal lobe
R4260171	ROSMAP_CELL2023	R4260171	Normal	Male	Frontal lobe
R7912121	ROSMAP_CELL2023	R7912121	AD	Male	Frontal lobe
H21.33.028_10x 3' v3	SEA-AD_MTG	H21.33.028_10x 3' v3	Normal	Male	Temporal lobe
R1710143	ROSMAP_NATURE2024b	R1710143	AD	Female	Frontal lobe
R3900996	ROSMAP_CELL2023	R3900996	AD	Male	Frontal lobe
10X378_2	37824663	10X378_2	Normal	Male	Thalamus
R4956716	ROSMAP_NATURE2024b	R4956716	Normal	Female	Frontal lobe
H20.33.032_10x 3' v3	SEA-AD_DLPFC	H20.33.032_10x 3' v3	AD	Male	Frontal lobe
s.0159	GSE243639	s.0159	Normal	Female	Basal ganglia
H20.33.008_10x multiome	SEA-AD_MTG	H20.33.008_10x multiome	AD	Female	Temporal lobe
R8704458	ROSMAP_NATURE2024b	R8704458	Resilience	Female	Frontal lobe
10X218_6	37824663	10X218_6	Normal	Male	Pons
H21.33.045_10x 3' v3	SEA-AD_DLPFC	H21.33.045_10x 3' v3	AD	Female	Frontal lobe
Donor3OTC	GSE148822	Donor3OTC	Normal	Female	Occipital lobe
Donor8OTC	GSE148822	Donor8OTC	Normal	Male	Occipital lobe
R5525186	ROSMAP_CELL2023	R5525186	AD	Male	Frontal lobe
R4012015	ROSMAP_NATURE2024b	R4012015	PART	Male	Frontal lobe
H21.33.004_10x 3' v3	SEA-AD_DLPFC	H21.33.004_10x 3' v3	PART	Male	Frontal lobe
R6392007	ROSMAP_NATURE2024b	R6392007	PART	Female	Frontal lobe
R1521786	ROSMAP_NATURE2024b	R1521786	AD	Male	Frontal lobe
10X264_8	37824663	10X264_8	Normal	Male	Cerebral cortex
R8180874	ROSMAP_CELL2023	R8180874	Resilience	Male	Frontal lobe
R4482444	ROSMAP_NATURE2024b	R4482444	PART	Female	Frontal lobe
210526_FTLD_209_snRNA-B9	Syn51105515	210526_FTLD_209_snRNA-B9	Frontotemporal lobar degeneration	Female	Frontal lobe
10X356_4	37824663	10X356_4	Normal	Male	Cerebellum
210526_PN_318_snRNA-H12	Syn51105515	210526_PN_318_snRNA-H12	Normal	Male	Frontal lobe
10X383_3	37824663	10X383_3	Normal	Male	Pons
R3400726	ROSMAP_NATURE2024b	R3400726	AD	Female	Frontal lobe
R8474433	ROSMAP_CELL2023	R8474433	Normal	Female	Frontal lobe
R3257830	ROSMAP_NATURE2024b	R3257830	AD	Male	Frontal lobe
AD-AT8-8	GSE129308	AD-AT8-8	AD	Female	Frontal lobe
10X194_5	37824663	10X194_5	Normal	Male	Midbrain
R2670295	ROSMAP_CELL2023	R2670295	AD	Female	Frontal lobe
10X361_8	37824663	10X361_8	Normal	Male	Basal ganglia
201019_ALS_102_snRNA-B2	Syn51105515	201019_ALS_102_snRNA-B2	Amyotrophic lateral sclerosis	Female	Frontal lobe
R7583108	ROSMAP_CELL2023	R7583108	AD	Male	Frontal lobe
10X375_1	37824663	10X375_1	Normal	Male	Basal ganglia
s81	GSE254569	s81	Schizophrenia	Male	Frontal lobe
R5405023	ROSMAP_CELL2023	R5405023	AD	Female	Frontal lobe
R6655598	ROSMAP_CELL2023	R6655598	AD	Male	Frontal lobe
H21.33.022_10x 3' v3	SEA-AD_DLPFC	H21.33.022_10x 3' v3	AD	Female	Frontal lobe
R8629052	ROSMAP_CELL2023	R8629052	AD	Female	Frontal lobe
ALS16	ALS_multiome	ALS16	Amyotrophic lateral sclerosis	Female	Frontal lobe
10X227_6	37824663	10X227_6	Normal	Male	Cerebral cortex
R3864948	ROSMAP_CELL2023	R3864948	AD	Male	Frontal lobe
10X249_3	37824663	10X249_3	Normal	Male	Cerebral cortex
R8155560	ROSMAP_CELL2023	R8155560	Normal	Female	Frontal lobe
R3341095	ROSMAP_NATURE2024b	R3341095	AD	Female	Frontal lobe
10X194_6	37824663	10X194_6	Normal	Male	Midbrain
R5079327	ROSMAP_NATURE2024b	R5079327	AD	Male	Frontal lobe
10X276_5	37824663	10X276_5	Normal	Male	Cerebral cortex
10X204_6	37824663	10X204_6	Normal	Male	Thalamus
10X160_5	37824663	10X160_5	Normal	Female	Cerebral cortex
R6292415	ROSMAP_CELL2023	R6292415	PART	Female	Frontal lobe
10X176_1	37824663	10X176_1	Normal	Male	Midbrain
R9210731	ROSMAP_NATURE2024b	R9210731	Normal	Male	Frontal lobe
R2979477	ROSMAP_NATURE2024b	R2979477	Normal	Female	Frontal lobe
191113_FTLD_204_snRNA-D4	Syn51105515	191113_FTLD_204_snRNA-D4	Frontotemporal lobar degeneration	Female	Frontal lobe
R5415701	ROSMAP_CELL2023	R5415701	Normal	Female	Frontal lobe
210526_ALS_110_snRNA-H11	Syn51105515	210526_ALS_110_snRNA-H11	Amyotrophic lateral sclerosis	Female	Frontal lobe
10X354_2	37824663	10X354_2	Normal	Male	Midbrain
R6939144	ROSMAP_NATURE2024b	R6939144	AD	Male	Frontal lobe
A19-173	ADRD_multiome	A19-173	AD	Female	Cerebellum
ALS11	ALS_multiome	ALS11	Amyotrophic lateral sclerosis	Female	Frontal lobe
210526_ALS_104_snRNA-H8	Syn51105515	210526_ALS_104_snRNA-H8	Amyotrophic lateral sclerosis	Female	Frontal lobe
10X329_5	37824663	10X329_5	Normal	Male	Basal ganglia
R9088015	ROSMAP_NATURE2024b	R9088015	AD	Male	Frontal lobe
R8057601	ROSMAP_NATURE2024b	R8057601	Resilience	Female	Frontal lobe
10X160_3	37824663	10X160_3	Normal	Male	Cerebral cortex
10X241_1	37824663	10X241_1	Normal	Male	Cerebral cortex
10X375_5	37824663	10X375_5	Normal	Male	Basal ganglia
H21.33.042_10x 3' v3	SEA-AD_MTG	H21.33.042_10x 3' v3	AD	Female	Temporal lobe
210910_PFC_ALS_140_snRNA-D9	Syn51105515	210910_PFC_ALS_140_snRNA-D9	Amyotrophic lateral sclerosis	Female	Frontal lobe
A20-146	ADRD_multiome	A20-146	AD	Female	Cerebellum
H18.30.002_M1	37824655	H18.30.002_M1	Normal	Male	Frontal lobe
R6665276	ROSMAP_CELL2023	R6665276	Normal	Female	Frontal lobe
R5131375	ROSMAP_NATURE2024b	R5131375	AD	Female	Frontal lobe
10X349_3	37824663	10X349_3	Normal	Male	Cerebral cortex
10X356_6	37824663	10X356_6	Normal	Male	Basal ganglia
R9566976	ROSMAP_NATURE2024b	R9566976	Normal	Female	Frontal lobe
R6284240	ROSMAP_NATURE2024b	R6284240	PART	Female	Frontal lobe
210526_ALS_122_snRNA-A10	Syn51105515	210526_ALS_122_snRNA-A10	Amyotrophic lateral sclerosis	Male	Frontal lobe
R3744330	ROSMAP_CELL2023	R3744330	AD	Female	Frontal lobe
R4841941	ROSMAP_CELL2023	R4841941	PART	Female	Frontal lobe
R7047807	ROSMAP_CELL2023	R7047807	Normal	Male	Frontal lobe
R8744945	ROSMAP_CELL2023	R8744945	PART	Male	Frontal lobe
R2494273	ROSMAP_CELL2023	R2494273	PART	Female	Frontal lobe
s.0152	GSE243639	s.0152	Normal	Female	Basal ganglia
R6828280	ROSMAP_CELL2023	R6828280	AD	Male	Frontal lobe
10X241_8	37824663	10X241_8	Normal	Male	Cerebral cortex
10X269_1	37824663	10X269_1	Normal	Male	Cerebral cortex
R5184427	ROSMAP_NATURE2024b	R5184427	AD	Female	Frontal lobe
210910_PFC_ALS_138_snRNA-D5	Syn51105515	210910_PFC_ALS_138_snRNA-D5	Amyotrophic lateral sclerosis	Female	Frontal lobe
R4388056	ROSMAP_CELL2023	R4388056	AD	Male	Frontal lobe
R1944372	ROSMAP_NATURE2024b	R1944372	PART	Male	Frontal lobe
H21.33.026_10x 3' v3	SEA-AD_DLPFC	H21.33.026_10x 3' v3	AD	Female	Frontal lobe
H20.33.024_10x 3' v3	SEA-AD_MTG	H20.33.024_10x 3' v3	AD	Male	Temporal lobe
R2880377	ROSMAP_NATURE2024b	R2880377	PART	Female	Frontal lobe
H21.33.032_10x 3' v3	SEA-AD_MTG	H21.33.032_10x 3' v3	Normal	Female	Temporal lobe
10X229_4	37824663	10X229_4	Normal	Male	Limbic lobe
10X360_7	37824663	10X360_7	Normal	Male	Hypothalamus
R9314674	ROSMAP_NATURE2024b	R9314674	AD	Female	Frontal lobe
R4762074	ROSMAP_CELL2023	R4762074	Normal	Male	Frontal lobe
H20.33.019_10x multiome	SEA-AD_DLPFC	H20.33.019_10x multiome	AD	Female	Frontal lobe
R3844037	ROSMAP_NATURE2024b	R3844037	Resilience	Female	Frontal lobe
10X220_8	37824663	10X220_8	Normal	Male	Basal ganglia
R5546461	ROSMAP_CELL2023	R5546461	AD	Female	Frontal lobe
R6531744	ROSMAP_CELL2023	R6531744	PART	Female	Frontal lobe
R7483736	ROSMAP_CELL2023	R7483736	Normal	Male	Frontal lobe
R8937093	ROSMAP_CELL2023	R8937093	AD	Female	Frontal lobe
R3948425	ROSMAP_CELL2023	R3948425	PART	Male	Frontal lobe
191112_ALS_130_snRNA-A5	Syn51105515	191112_ALS_130_snRNA-A5	Amyotrophic lateral sclerosis	Male	Frontal lobe
R3589148	ROSMAP_NATURE2024b	R3589148	AD	Female	Frontal lobe
10X204_4	37824663	10X204_4	Normal	Male	Medulla
10X174_4	37824663	10X174_4	Normal	Male	Cerebral cortex
R5133113	ROSMAP_NATURE2024b	R5133113	Resilience	Female	Frontal lobe
R2373966	ROSMAP_CELL2023	R2373966	Normal	Male	Frontal lobe
H21.33.002_10x 3' v3	SEA-AD_DLPFC	H21.33.002_10x 3' v3	AD	Female	Frontal lobe
R8209563	ROSMAP_NATURE2024b	R8209563	AD	Female	Frontal lobe
210526_ALS_113_snRNA-A3	Syn51105515	210526_ALS_113_snRNA-A3	Amyotrophic lateral sclerosis	Female	Frontal lobe
10X248_1	37824663	10X248_1	Normal	Male	Cerebral cortex
R3776872	ROSMAP_CELL2023	R3776872	AD	Male	Frontal lobe
R7767837	ROSMAP_NATURE2024b	R7767837	AD	Female	Frontal lobe
R2895885	ROSMAP_CELL2023	R2895885	AD	Male	Frontal lobe
R4242008	ROSMAP_NATURE2024b	R4242008	Normal	Female	Frontal lobe
s78	GSE254569	s78	Normal	Female	Frontal lobe
R3405776	ROSMAP_CELL2023	R3405776	PART	Female	Frontal lobe
H21.33.028_10x 3' v3	SEA-AD_DLPFC	H21.33.028_10x 3' v3	Normal	Male	Frontal lobe
s21	GSE254569	s21	Schizoaffective disorder	Male	Frontal lobe
R2398487	ROSMAP_CELL2023	R2398487	AD	Female	Frontal lobe
201025_FTLD_237_snRNA-C9	Syn51105515	201025_FTLD_237_snRNA-C9	Frontotemporal lobar degeneration	Male	Frontal lobe
R5415701	ROSMAP_NATURE2024b	R5415701	Normal	Female	Frontal lobe
41d8dfdb-ac20-4b0c-b30a-8b9c6911d7e4	37217978	41d8dfdb-ac20-4b0c-b30a-8b9c6911d7e4	Normal	Female	Frontal lobe
R1213305	ROSMAP_CELL2023	R1213305	PART	Male	Frontal lobe
201025_FTLD_235_snRNA-C7	Syn51105515	201025_FTLD_235_snRNA-C7	Frontotemporal lobar degeneration	Male	Frontal lobe
10X350_2	37824663	10X350_2	Normal	Male	Cerebellum
R1531359	ROSMAP_NATURE2024b	R1531359	AD	Female	Frontal lobe
H21.33.008_10x multiome	SEA-AD_MTG	H21.33.008_10x multiome	AD	Female	Temporal lobe
R4249236	ROSMAP_CELL2023	R4249236	AD	Male	Frontal lobe
Case57_posterior	34051145	Case57_posterior	Epilepsy	Female	Limbic lobe
10X228_3	37824663	10X228_3	Normal	Male	Cerebral cortex
10X276_4	37824663	10X276_4	Normal	Male	Cerebral cortex
Donor7OC	GSE148822	Donor7OC	Normal	Female	Occipital lobe
10X172_7	37824663	10X172_7	Normal	Male	Cerebral cortex
201025_FTLD_234_snRNA-C6	Syn51105515	201025_FTLD_234_snRNA-C6	Frontotemporal lobar degeneration	Male	Frontal lobe
10X190_1	37824663	10X190_1	Normal	Male	Cerebral cortex
210910_MCX_ALS_137_snRNA-C8	Syn51105515	210910_MCX_ALS_137_snRNA-C8	Amyotrophic lateral sclerosis	Male	Frontal lobe
10X348_3	37824663	10X348_3	Normal	Male	Thalamus
R2079629	ROSMAP_NATURE2024b	R2079629	AD	Female	Frontal lobe
H21.33.033_10x 3' v3	SEA-AD_DLPFC	H21.33.033_10x 3' v3	AD	Female	Frontal lobe
R3368249	ROSMAP_NATURE2024b	R3368249	PART	Female	Frontal lobe
860d069d-239c-461d-9ac9-e3fe7618f8f1	37217978	860d069d-239c-461d-9ac9-e3fe7618f8f1	Normal	Female	Spinal cord
R4323608	ROSMAP_NATURE2024b	R4323608	PART	Male	Frontal lobe
s36	GSE254569	s36	Normal	Male	Frontal lobe
210526_FTLD_211_snRNA-B11	Syn51105515	210526_FTLD_211_snRNA-B11	Frontotemporal lobar degeneration	Female	Frontal lobe
210526_ALS_102_snRNA-H6	Syn51105515	210526_ALS_102_snRNA-H6	Amyotrophic lateral sclerosis	Female	Frontal lobe
R5061712	ROSMAP_NATURE2024b	R5061712	PART	Male	Frontal lobe
10X228_6	37824663	10X228_6	Normal	Male	Cerebral cortex
R2879330	ROSMAP_NATURE2024b	R2879330	Resilience	Female	Frontal lobe
R5374583	ROSMAP_CELL2023	R5374583	PART	Female	Frontal lobe
Donor16OC	GSE148822	Donor16OC	AD	Female	Occipital lobe
R7483736	ROSMAP_NATURE2024b	R7483736	Normal	Male	Frontal lobe
s.0158	GSE243639	s.0158	Normal	Male	Basal ganglia
H21.33.035_10x 3' v3	SEA-AD_DLPFC	H21.33.035_10x 3' v3	AD	Female	Frontal lobe
10X194_8	37824663	10X194_8	Normal	Male	Midbrain
10X329_3	37824663	10X329_3	Normal	Male	Cerebral cortex
R2140101	ROSMAP_CELL2023	R2140101	PART	Male	Frontal lobe
10X206_3	37824663	10X206_3	Normal	Male	Thalamus
R5256488	ROSMAP_NATURE2024b	R5256488	AD	Female	Frontal lobe
R8760165	ROSMAP_NATURE2024b	R8760165	PART	Male	Frontal lobe
10X358_2	37824663	10X358_2	Normal	Male	Midbrain
R6887989	ROSMAP_CELL2023	R6887989	AD	Female	Frontal lobe
H21.33.005_10x 3' v3	SEA-AD_DLPFC	H21.33.005_10x 3' v3	AD	Male	Frontal lobe
10X190_5	37824663	10X190_5	Normal	Male	Hypothalamus
R4570065	ROSMAP_CELL2023	R4570065	PART	Female	Frontal lobe
10X358_7	37824663	10X358_7	Normal	Male	Basal ganglia
H20.33.001_10x 3' v3	SEA-AD_MTG	H20.33.001_10x 3' v3	Normal	Male	Temporal lobe
10X277_3	37824663	10X277_3	Normal	Male	Cerebral cortex
10X228_1	37824663	10X228_1	Normal	Male	Cerebral cortex
10X203_6	37824663	10X203_6	Normal	Male	Basal ganglia
s74	GSE254569	s74	Schizophrenia	Male	Frontal lobe
10X145_4	37824663	10X145_4	Normal	Male	Basal ganglia
H20.33.002_10x 3' v3	SEA-AD_DLPFC	H20.33.002_10x 3' v3	PART	Female	Frontal lobe
H21.33.029_10x 3' v3	SEA-AD_DLPFC	H21.33.029_10x 3' v3	AD	Male	Frontal lobe
R1617674	ROSMAP_CELL2023	R1617674	AD	Female	Frontal lobe
R2645096	ROSMAP_NATURE2024b	R2645096	Normal	Female	Frontal lobe
R7698313	ROSMAP_NATURE2024b	R7698313	PART	Female	Frontal lobe
3c6fff02-aae9-4a5a-8736-b7b5103c7958	37217978	3c6fff02-aae9-4a5a-8736-b7b5103c7958	Normal	Female	Spinal cord
R9680160	ROSMAP_NATURE2024b	R9680160	AD	Female	Frontal lobe
R2575548	ROSMAP_CELL2023	R2575548	Resilience	Male	Frontal lobe
s45	GSE254569	s45	Schizophrenia	Female	Frontal lobe
R4990009	ROSMAP_NATURE2024b	R4990009	Resilience	Female	Frontal lobe
10X356_5	37824663	10X356_5	Normal	Male	Basal ganglia
R7912121	ROSMAP_NATURE2024b	R7912121	AD	Male	Frontal lobe
R2367199	ROSMAP_CELL2023	R2367199	Resilience	Male	Frontal lobe
s.0154	GSE243639	s.0154	Normal	Male	Basal ganglia
R5739959	ROSMAP_NATURE2024b	R5739959	Normal	Male	Frontal lobe
210526_ALS_106_snRNA-H9	Syn51105515	210526_ALS_106_snRNA-H9	Amyotrophic lateral sclerosis	Female	Frontal lobe
10X222_4	37824663	10X222_4	Normal	Male	Pons
R2424757	ROSMAP_CELL2023	R2424757	AD	Female	Frontal lobe
R6370138	ROSMAP_CELL2023	R6370138	Normal	Male	Frontal lobe
10X240_6	37824663	10X240_6	Normal	Male	Cerebral cortex
R2506056	ROSMAP_CELL2023	R2506056	PART	Female	Frontal lobe
A096/14 SSC	GSE160936	A096/14 SSC	AD	Male	Parietal lobe
191114_PN_325_snRNA-F8	Syn51105515	191114_PN_325_snRNA-F8	Normal	Male	Frontal lobe
10X190_6	37824663	10X190_6	Normal	Male	Hypothalamus
H20.33.001_10x multiome	SEA-AD_DLPFC	H20.33.001_10x multiome	Normal	Male	Frontal lobe
R9771008	ROSMAP_CELL2023	R9771008	AD	Male	Frontal lobe
10X386_7	37824663	10X386_7	Normal	Male	Limbic lobe
10X387_2	37824663	10X387_2	Normal	Male	Medulla
10X381_8	37824663	10X381_8	Normal	Male	Limbic lobe
10X392_3	37824663	10X392_3	Normal	Male	Hypothalamus
200721_FTLD_210_snRNA-A11	Syn51105515	200721_FTLD_210_snRNA-A11	Frontotemporal lobar degeneration	Female	Frontal lobe
10X193_1	37824663	10X193_1	Normal	Male	Midbrain
10X230_3	37824663	10X230_3	Normal	Male	Midbrain
R5656511	ROSMAP_NATURE2024b	R5656511	Normal	Female	Frontal lobe
R2543886	ROSMAP_CELL2023	R2543886	PART	Male	Frontal lobe
10X193_5	37824663	10X193_5	Normal	Male	Thalamus
H20.33.038_10x 3' v3	SEA-AD_DLPFC	H20.33.038_10x 3' v3	AD	Female	Frontal lobe
10X318_7	37824663	10X318_7	Normal	Male	Basal ganglia
R6698302	ROSMAP_CELL2023	R6698302	Normal	Male	Frontal lobe
R3884524	ROSMAP_CELL2023	R3884524	AD	Female	Frontal lobe
210910_MCX_ALS_139_snRNA-D6	Syn51105515	210910_MCX_ALS_139_snRNA-D6	Amyotrophic lateral sclerosis	Female	Frontal lobe
10X174_3	37824663	10X174_3	Normal	Male	Cerebral cortex
R5079327	ROSMAP_CELL2023	R5079327	AD	Male	Frontal lobe
10X329_1	37824663	10X329_1	Normal	Male	Cerebral cortex
R1067972	ROSMAP_CELL2023	R1067972	PART	Female	Frontal lobe
H21.33.034_10x 3' v3	SEA-AD_MTG	H21.33.034_10x 3' v3	AD	Female	Temporal lobe
10X361_6	37824663	10X361_6	Normal	Male	Cerebral cortex
H20.33.041_10x 3' v3	SEA-AD_DLPFC	H20.33.041_10x 3' v3	AD	Female	Frontal lobe
10X176_5	37824663	10X176_5	Normal	Male	Cerebellum
10X216_3	37824663	10X216_3	Normal	Male	Cerebral cortex
R2543886	ROSMAP_NATURE2024b	R2543886	PART	Male	Frontal lobe
H21.33.001_10x 3' v3	SEA-AD_MTG	H21.33.001_10x 3' v3	PART	Male	Temporal lobe
R1042011	ROSMAP_CELL2023	R1042011	PART	Female	Frontal lobe
R3740754	ROSMAP_CELL2023	R3740754	AD	Male	Frontal lobe
Sample-82	GSE174367	Sample-82	Normal	Male	Frontal lobe
R8330118	ROSMAP_NATURE2024b	R8330118	PART	Female	Frontal lobe
R7651923	ROSMAP_NATURE2024b	R7651923	Resilience	Female	Frontal lobe
R7627203	ROSMAP_CELL2023	R7627203	Normal	Male	Frontal lobe
191114_PN_317_snRNA-F2	Syn51105515	191114_PN_317_snRNA-F2	Normal	Male	Frontal lobe
10X145_5	37824663	10X145_5	Normal	Male	Basal ganglia
10X240_1	37824663	10X240_1	Normal	Male	Cerebral cortex
10X204_5	37824663	10X204_5	Normal	Male	Thalamus
10X418_2	37824663	10X418_2	Normal	Male	Pons
H21.33.019_10x multiome	SEA-AD_DLPFC	H21.33.019_10x multiome	Normal	Male	Frontal lobe
NC17	GSE157827	NC17	Normal	Male	Frontal lobe
H20.33.018_10x multiome	SEA-AD_DLPFC	H20.33.018_10x multiome	AD	Female	Frontal lobe
10X221_7	37824663	10X221_7	Normal	Male	Cerebral cortex
R5210462	ROSMAP_NATURE2024b	R5210462	PART	Male	Frontal lobe
10X377_2	37824663	10X377_2	Normal	Male	Thalamus
10X276_7	37824663	10X276_7	Normal	Male	Cerebral cortex
Sample-100	GSE174367	Sample-100	Normal	Male	Frontal lobe
R2616766	ROSMAP_CELL2023	R2616766	AD	Female	Frontal lobe
s19	GSE254569	s19	Schizoaffective disorder	Male	Frontal lobe
10X190_7	37824663	10X190_7	Normal	Male	Basal ganglia
10X192_5	37824663	10X192_5	Normal	Male	Limbic lobe
10X227_1	37824663	10X227_1	Normal	Male	Pons
10X381_7	37824663	10X381_7	Normal	Male	Limbic lobe
s70	GSE254569	s70	Normal	Male	Frontal lobe
R7881801	ROSMAP_NATURE2024b	R7881801	AD	Female	Frontal lobe
R3841825	ROSMAP_CELL2023	R3841825	AD	Male	Frontal lobe
10X358_3	37824663	10X358_3	Normal	Male	Midbrain
10X182_7	37824663	10X182_7	Normal	Male	Basal ganglia
R2006886	ROSMAP_NATURE2024b	R2006886	AD	Female	Frontal lobe
R1487461	ROSMAP_CELL2023	R1487461	PART	Male	Frontal lobe
R2396089	ROSMAP_NATURE2024b	R2396089	AD	Male	Frontal lobe
10X379_2	37824663	10X379_2	Normal	Male	Medulla
R3864948	ROSMAP_NATURE2024b	R3864948	AD	Male	Frontal lobe
G14	ADRD_multiome	G14	Normal	Male	Cerebellum
R3426726	ROSMAP_CELL2023	R3426726	AD	Female	Frontal lobe
10X353_2	37824663	10X353_2	Normal	Male	Basal ganglia
AD6	GSE157827	AD6	AD	Male	Frontal lobe
R9557117	ROSMAP_NATURE2024b	R9557117	AD	Female	Frontal lobe
201025_FTLD_239_snRNA-C11	Syn51105515	201025_FTLD_239_snRNA-C11	Frontotemporal lobar degeneration	Male	Frontal lobe
10X388_3	37824663	10X388_3	Normal	Male	Limbic lobe
H18.30.001_S1	37824655	H18.30.001_S1	Normal	Female	Parietal lobe
R8292982	ROSMAP_NATURE2024b	R8292982	Resilience	Female	Frontal lobe
R6415047	ROSMAP_CELL2023	R6415047	AD	Male	Frontal lobe
R8635714	ROSMAP_CELL2023	R8635714	PART	Male	Frontal lobe
210910_PFC_ALS_131_snRNA-C10	Syn51105515	210910_PFC_ALS_131_snRNA-C10	Amyotrophic lateral sclerosis	Female	Frontal lobe
H20.33.016_10x multiome	SEA-AD_DLPFC	H20.33.016_10x multiome	AD	Female	Frontal lobe
R1933335	ROSMAP_NATURE2024b	R1933335	AD	Female	Frontal lobe
10X205_7	37824663	10X205_7	Normal	Male	Basal ganglia
R8553520	ROSMAP_NATURE2024b	R8553520	Normal	Female	Frontal lobe
10X358_1	37824663	10X358_1	Normal	Male	Midbrain
10X172_3	37824663	10X172_3	Normal	Male	Cerebral cortex
R7208968	ROSMAP_NATURE2024b	R7208968	AD	Male	Frontal lobe
R2441341	ROSMAP_CELL2023	R2441341	PART	Male	Frontal lobe
10X203_2	37824663	10X203_2	Normal	Male	Thalamus
191114_PN_328_snRNA-F9	Syn51105515	191114_PN_328_snRNA-F9	Normal	Male	Frontal lobe
10X159_3	37824663	10X159_3	Normal	Female	Cerebral cortex
R3408213	ROSMAP_NATURE2024b	R3408213	Resilience	Female	Frontal lobe
R5459434	ROSMAP_NATURE2024b	R5459434	Normal	Female	Frontal lobe
R3485645	ROSMAP_NATURE2024b	R3485645	Normal	Female	Frontal lobe
R5518725	ROSMAP_NATURE2024b	R5518725	AD	Female	Frontal lobe
10X390_3	37824663	10X390_3	Normal	Male	Pons
74129029-113c-4a7c-adf9-ccac3fd94b54	37217978	74129029-113c-4a7c-adf9-ccac3fd94b54	Normal	Male	Cerebellum
PDC016 EC	GSE160936	PDC016 EC	Normal	Female	Temporal lobe
R3910349	ROSMAP_NATURE2024b	R3910349	PART	Female	Frontal lobe
H20.33.026_10x 3' v3	SEA-AD_DLPFC	H20.33.026_10x 3' v3	AD	Female	Frontal lobe
10X270_1	37824663	10X270_1	Normal	Male	Cerebral cortex
R3757880	ROSMAP_CELL2023	R3757880	Resilience	Female	Frontal lobe
R3328867	ROSMAP_NATURE2024b	R3328867	Normal	Male	Frontal lobe
2544	35513515	2544	Lewy body dementia	Female	Basal ganglia
191113_FTLD_217_snRNA-D11	Syn51105515	191113_FTLD_217_snRNA-D11	Frontotemporal lobar degeneration	Male	Frontal lobe
R9419876	ROSMAP_CELL2023	R9419876	PART	Male	Frontal lobe
s75	GSE254569	s75	Schizophrenia	Male	Frontal lobe
10X176_2	37824663	10X176_2	Normal	Male	Midbrain
10X269_3	37824663	10X269_3	Normal	Male	Cerebral cortex
R9582641	ROSMAP_CELL2023	R9582641	AD	Male	Frontal lobe
H20.33.017_10x 3' v3	SEA-AD_MTG	H20.33.017_10x 3' v3	AD	Male	Temporal lobe
R4581557	ROSMAP_NATURE2024b	R4581557	AD	Male	Frontal lobe
R7015250	ROSMAP_NATURE2024b	R7015250	PART	Female	Frontal lobe
s58	GSE254569	s58	Normal	Male	Frontal lobe
R6934314	ROSMAP_CELL2023	R6934314	Normal	Male	Frontal lobe
R2529284	ROSMAP_NATURE2024b	R2529284	Normal	Female	Frontal lobe
s34	GSE254569	s34	Schizophrenia	Male	Frontal lobe
R3596834	ROSMAP_CELL2023	R3596834	AD	Female	Frontal lobe
R2880377	ROSMAP_CELL2023	R2880377	PART	Female	Frontal lobe
10X249_2	37824663	10X249_2	Normal	Male	Cerebral cortex
NC16	GSE157827	NC16	Normal	Male	Frontal lobe
R3280186	ROSMAP_NATURE2024b	R3280186	Normal	Male	Frontal lobe
R6557859	ROSMAP_CELL2023	R6557859	AD	Female	Frontal lobe
201019_ALS_101_snRNA-B1	Syn51105515	201019_ALS_101_snRNA-B1	Amyotrophic lateral sclerosis	Female	Frontal lobe
10X419_2	37824663	10X419_2	Normal	Male	Basal ganglia
10X217_5	37824663	10X217_5	Normal	Male	Pons
10X362_3	37824663	10X362_3	Normal	Male	Hypothalamus
R2488731	ROSMAP_NATURE2024b	R2488731	AD	Male	Frontal lobe
R3067449	ROSMAP_CELL2023	R3067449	PART	Female	Frontal lobe
R6555891	ROSMAP_CELL2023	R6555891	AD	Male	Frontal lobe
R9127940	ROSMAP_NATURE2024b	R9127940	PART	Female	Frontal lobe
R4388056	ROSMAP_NATURE2024b	R4388056	AD	Male	Frontal lobe
10X382_6	37824663	10X382_6	Normal	Male	Cerebral cortex
H18.30.002_DLPFC	37824655	H18.30.002_DLPFC	Normal	Male	Frontal lobe
10X319_4	37824663	10X319_4	Normal	Male	Basal ganglia
200721_FTLD_206_snRNA-A10	Syn51105515	200721_FTLD_206_snRNA-A10	Frontotemporal lobar degeneration	Female	Frontal lobe
210910_MCX_ALS_133_snRNA-C4	Syn51105515	210910_MCX_ALS_133_snRNA-C4	Amyotrophic lateral sclerosis	Male	Frontal lobe
10X357_5	37824663	10X357_5	Normal	Male	Thalamus
R8598847	ROSMAP_CELL2023	R8598847	PART	Male	Frontal lobe
H20.33.024_10x 3' v3	SEA-AD_DLPFC	H20.33.024_10x 3' v3	AD	Male	Frontal lobe
R1489314	ROSMAP_NATURE2024b	R1489314	AD	Female	Frontal lobe
R1236313	ROSMAP_NATURE2024b	R1236313	Normal	Female	Frontal lobe
R4937504	ROSMAP_NATURE2024b	R4937504	Resilience	Female	Frontal lobe
R1103580	ROSMAP_CELL2023	R1103580	AD	Female	Frontal lobe
R6226355	ROSMAP_NATURE2024b	R6226355	AD	Female	Frontal lobe
R5334541	ROSMAP_NATURE2024b	R5334541	Resilience	Female	Frontal lobe
10X174_1	37824663	10X174_1	Normal	Male	Cerebellum
s22	GSE254569	s22	Bipolar disorder	Male	Frontal lobe
A20-130	ADRD_multiome	A20-130	AD	Female	Cerebellum
NC7	GSE157827	NC7	Normal	Male	Frontal lobe
H20.33.012_10x multiome	SEA-AD_MTG	H20.33.012_10x multiome	PART	Female	Temporal lobe
10X172_8	37824663	10X172_8	Normal	Male	Cerebral cortex
G2	ADRD_multiome	G2	AD	Female	Cerebellum
R7696135	ROSMAP_CELL2023	R7696135	Resilience	Female	Frontal lobe
R3201576	ROSMAP_NATURE2024b	R3201576	Resilience	Male	Frontal lobe
Sample-19	GSE174367	Sample-19	AD	Female	Frontal lobe
10X386_8	37824663	10X386_8	Normal	Male	Limbic lobe
10X230_4	37824663	10X230_4	Normal	Male	Midbrain
R5356410	ROSMAP_CELL2023	R5356410	AD	Female	Frontal lobe
15eba021-94b1-4a1e-872e-a45b27b0018c	37217978	15eba021-94b1-4a1e-872e-a45b27b0018c	Normal	Male	Spinal cord
Case82_anterior	34051145	Case82_anterior	Epilepsy	Female	Limbic lobe
R2645096	ROSMAP_CELL2023	R2645096	Normal	Female	Frontal lobe
R1588427	ROSMAP_CELL2023	R1588427	Normal	Male	Frontal lobe
H21.33.041_10x 3' v3	SEA-AD_DLPFC	H21.33.041_10x 3' v3	PART	Female	Frontal lobe
10X384_6	37824663	10X384_6	Normal	Male	Cerebral cortex
210526_PN_309_snRNA-E2	Syn51105515	210526_PN_309_snRNA-E2	Normal	Female	Frontal lobe
10X206_6	37824663	10X206_6	Normal	Male	Limbic lobe
CTRL-3	GSE129308	CTRL-3	Normal	Male	Frontal lobe
R7904841	ROSMAP_NATURE2024b	R7904841	Normal	Female	Frontal lobe
H20.33.019_10x multiome	SEA-AD_MTG	H20.33.019_10x multiome	AD	Female	Temporal lobe
R3722356	ROSMAP_NATURE2024b	R3722356	AD	Male	Frontal lobe
R1538032	ROSMAP_CELL2023	R1538032	AD	Female	Frontal lobe
s64	GSE254569	s64	Normal	Male	Frontal lobe
R6911631	ROSMAP_CELL2023	R6911631	PART	Female	Frontal lobe
10X206_4	37824663	10X206_4	Normal	Male	Thalamus
R2626559	ROSMAP_CELL2023	R2626559	PART	Male	Frontal lobe
10X173_7	37824663	10X173_7	Normal	Male	Cerebral cortex
A402/14 SSC	GSE160936	A402/14 SSC	AD	Male	Parietal lobe
H21.33.005_10x 3' v3	SEA-AD_MTG	H21.33.005_10x 3' v3	AD	Male	Temporal lobe
NC3	GSE157827	NC3	Normal	Male	Frontal lobe
10X418_7	37824663	10X418_7	Normal	Male	Cerebral cortex
32577ca7-eaae-4d9f-a0cb-326f456884b4	37217978	32577ca7-eaae-4d9f-a0cb-326f456884b4	Normal	Male	Cerebellum
NC11	GSE157827	NC11	Normal	Male	Frontal lobe
R8615683	ROSMAP_CELL2023	R8615683	AD	Female	Frontal lobe
10X353_3	37824663	10X353_3	Normal	Male	Basal ganglia
R2166876	ROSMAP_CELL2023	R2166876	AD	Male	Frontal lobe
H20.33.040_10x 3' v3	SEA-AD_MTG	H20.33.040_10x 3' v3	AD	Male	Temporal lobe
s.0111	GSE243639	s.0111	Parkinson's disease	Male	Basal ganglia
9c27e78c-acc3-4b85-950e-6d3cb5bc7c61	37217978	9c27e78c-acc3-4b85-950e-6d3cb5bc7c61	Normal	Male	Cerebellum
H20.33.013_10x multiome	SEA-AD_DLPFC	H20.33.013_10x multiome	AD	Male	Frontal lobe
R7950545	ROSMAP_CELL2023	R7950545	Normal	Male	Frontal lobe
R4249236	ROSMAP_NATURE2024b	R4249236	AD	Male	Frontal lobe
R6728038	ROSMAP_NATURE2024b	R6728038	Resilience	Male	Frontal lobe
H21.33.043_10x 3' v3	SEA-AD_MTG	H21.33.043_10x 3' v3	Normal	Female	Temporal lobe
H20.33.044_10x 3' v3	SEA-AD_MTG	H20.33.044_10x 3' v3	Normal	Male	Temporal lobe
H20.33.038_10x 3' v3	SEA-AD_MTG	H20.33.038_10x 3' v3	AD	Female	Temporal lobe
CTRL-2	GSE129308	CTRL-2	Normal	Female	Frontal lobe
10X217_3	37824663	10X217_3	Normal	Male	Cerebral cortex
R1583702	ROSMAP_NATURE2024b	R1583702	AD	Female	Frontal lobe
R8472815	ROSMAP_NATURE2024b	R8472815	Resilience	Female	Frontal lobe
H20.33.028_10x 3' v3	SEA-AD_MTG	H20.33.028_10x 3' v3	AD	Female	Temporal lobe
HSB189	36007006	HSB189	Normal	Male	Frontal lobe
R8774534	ROSMAP_NATURE2024b	R8774534	Normal	Female	Frontal lobe
10X383_2	37824663	10X383_2	Normal	Male	Limbic lobe
H21.33.003_10x 3' v3	SEA-AD_MTG	H21.33.003_10x 3' v3	Normal	Male	Temporal lobe
AD-MAP2-5	GSE129308	AD-MAP2-5	AD	Female	Frontal lobe
Donor14OTC	GSE148822	Donor14OTC	AD	Female	Occipital lobe
191114_PN_319_snRNA-F4	Syn51105515	191114_PN_319_snRNA-F4	Normal	Male	Frontal lobe
s.0130	GSE243639	s.0130	Normal	Male	Basal ganglia
10X348_1	37824663	10X348_1	Normal	Male	Thalamus
R1845714	ROSMAP_CELL2023	R1845714	AD	Female	Frontal lobe
10X264_6	37824663	10X264_6	Normal	Male	Cerebral cortex
R6622577	ROSMAP_NATURE2024b	R6622577	PART	Female	Frontal lobe
10X182_8	37824663	10X182_8	Normal	Male	Basal ganglia
R3874626	ROSMAP_CELL2023	R3874626	Resilience	Female	Frontal lobe
AD-AT8-5	GSE129308	AD-AT8-5	AD	Female	Frontal lobe
Donor7OTC	GSE148822	Donor7OTC	Normal	Female	Occipital lobe
210526_FTLD_216_snRNA-C1	Syn51105515	210526_FTLD_216_snRNA-C1	Frontotemporal lobar degeneration	Male	Frontal lobe
191114_PN_309_snRNA-F1	Syn51105515	191114_PN_309_snRNA-F1	Normal	Female	Frontal lobe
10X389_6	37824663	10X389_6	Normal	Male	Thalamus
s12	GSE254569	s12	Normal	Female	Frontal lobe
R1042566	ROSMAP_CELL2023	R1042566	AD	Female	Frontal lobe
10X249_6	37824663	10X249_6	Normal	Male	Cerebral cortex
10X379_3	37824663	10X379_3	Normal	Male	Cerebral cortex
R8457289	ROSMAP_CELL2023	R8457289	AD	Male	Frontal lobe
f8e344c1-4fd4-4c5b-99e0-2ca9058bd009	37217978	f8e344c1-4fd4-4c5b-99e0-2ca9058bd009	Normal	Male	Spinal cord
88aeb557-2c52-48fa-9293-f616f4227663	37217978	88aeb557-2c52-48fa-9293-f616f4227663	Normal	Female	Frontal lobe
R8963331	ROSMAP_NATURE2024b	R8963331	AD	Female	Frontal lobe
H20.33.032_10x 3' v3	SEA-AD_MTG	H20.33.032_10x 3' v3	AD	Male	Temporal lobe
4568	35513515	4568	Parkinson's disease	Male	Basal ganglia
R9253870	ROSMAP_CELL2023	R9253870	AD	Male	Frontal lobe
R9818080	ROSMAP_NATURE2024b	R9818080	Normal	Male	Frontal lobe
G10	ADRD_multiome	G10	Normal	Female	Cerebellum
H19.30.002_DLPFC	37824655	H19.30.002_DLPFC	Normal	Male	Frontal lobe
191114_PN_318_snRNA-F3	Syn51105515	191114_PN_318_snRNA-F3	Normal	Male	Frontal lobe
10X191_8	37824663	10X191_8	Normal	Male	Basal ganglia
10X319_3	37824663	10X319_3	Normal	Male	Basal ganglia
c0b5035c-f22a-4b37-bbdf-2c193201b075	37217978	c0b5035c-f22a-4b37-bbdf-2c193201b075	Normal	Female	Frontal lobe
Donor12OC	GSE148822	Donor12OC	AD	Female	Occipital lobe
10X387_5	37824663	10X387_5	Normal	Male	Limbic lobe
10X277_5	37824663	10X277_5	Normal	Male	Cerebral cortex
R4531942	ROSMAP_CELL2023	R4531942	Normal	Male	Frontal lobe
R4078277	ROSMAP_NATURE2024b	R4078277	AD	Male	Frontal lobe
R5211056	ROSMAP_NATURE2024b	R5211056	AD	Female	Frontal lobe
H20.33.001_10x multiome	SEA-AD_MTG	H20.33.001_10x multiome	Normal	Male	Temporal lobe
R8451530	ROSMAP_CELL2023	R8451530	AD	Male	Frontal lobe
10X182_6	37824663	10X182_6	Normal	Male	Basal ganglia
H20.33.013_10x 3' v3	SEA-AD_DLPFC	H20.33.013_10x 3' v3	AD	Male	Frontal lobe
R1287407	ROSMAP_CELL2023	R1287407	AD	Female	Frontal lobe
A297/16 SSC	GSE160936	A297/16 SSC	Normal	Male	Parietal lobe
10X173_3	37824663	10X173_3	Normal	Male	Midbrain
10X382_3	37824663	10X382_3	Normal	Male	Cerebral cortex
R3857927	ROSMAP_NATURE2024b	R3857927	Normal	Female	Frontal lobe
R1609849	ROSMAP_NATURE2024b	R1609849	AD	Female	Frontal lobe
210910_MCX_ALS_131_snRNA-C2	Syn51105515	210910_MCX_ALS_131_snRNA-C2	Amyotrophic lateral sclerosis	Female	Frontal lobe
200721_FTLD_229_snRNA-B2	Syn51105515	200721_FTLD_229_snRNA-B2	Frontotemporal lobar degeneration	Male	Frontal lobe
R2197944	ROSMAP_NATURE2024b	R2197944	AD	Female	Frontal lobe
R8477425	ROSMAP_NATURE2024b	R8477425	PART	Male	Frontal lobe
10X386_3	37824663	10X386_3	Normal	Male	Pons
R6114572	ROSMAP_CELL2023	R6114572	Resilience	Male	Frontal lobe
A169/10 EC	GSE160936	A169/10 EC	AD	Female	Temporal lobe
10X230_5	37824663	10X230_5	Normal	Male	Limbic lobe
H20.33.004_10x 3' v3	SEA-AD_MTG	H20.33.004_10x 3' v3	AD	Male	Temporal lobe
10X393_4	37824663	10X393_4	Normal	Male	Limbic lobe
R6163933	ROSMAP_NATURE2024b	R6163933	AD	Female	Frontal lobe
1963	35513515	1963	Parkinson's disease	Male	Basal ganglia
10X276_6	37824663	10X276_6	Normal	Male	Cerebral cortex
R1660726	ROSMAP_CELL2023	R1660726	Normal	Male	Frontal lobe
210910_PFC_ALS_137_snRNA-D4	Syn51105515	210910_PFC_ALS_137_snRNA-D4	Amyotrophic lateral sclerosis	Male	Frontal lobe
R7840275	ROSMAP_NATURE2024b	R7840275	Resilience	Male	Frontal lobe
10X172_4	37824663	10X172_4	Normal	Male	Cerebral cortex
R9330569	ROSMAP_CELL2023	R9330569	PART	Female	Frontal lobe
9c580196-eddf-4c33-9ad0-11e245597f52	37217978	9c580196-eddf-4c33-9ad0-11e245597f52	Normal	Female	Spinal cord
10X357_7	37824663	10X357_7	Normal	Male	Thalamus
R4581557	ROSMAP_CELL2023	R4581557	AD	Male	Frontal lobe
R7438391	ROSMAP_NATURE2024b	R7438391	AD	Female	Frontal lobe
R1588427	ROSMAP_NATURE2024b	R1588427	Normal	Male	Frontal lobe
H20.33.027_10x 3' v3	SEA-AD_DLPFC	H20.33.027_10x 3' v3	AD	Female	Frontal lobe
AD-AT8-6	GSE129308	AD-AT8-6	AD	Male	Frontal lobe
R8444624	ROSMAP_CELL2023	R8444624	Normal	Female	Frontal lobe
10X361_7	37824663	10X361_7	Normal	Male	Basal ganglia
R1748114	ROSMAP_NATURE2024b	R1748114	PART	Female	Frontal lobe
H21.33.016_10x 3' v3	SEA-AD_MTG	H21.33.016_10x 3' v3	PART	Female	Temporal lobe
R5541746	ROSMAP_CELL2023	R5541746	PART	Female	Frontal lobe
R1687970	ROSMAP_CELL2023	R1687970	AD	Male	Frontal lobe
10X376_2	37824663	10X376_2	Normal	Male	Midbrain
R7096488	ROSMAP_CELL2023	R7096488	AD	Male	Frontal lobe
R5955028	ROSMAP_NATURE2024b	R5955028	AD	Female	Frontal lobe
R5177066	ROSMAP_CELL2023	R5177066	Resilience	Male	Frontal lobe
R4575675	ROSMAP_CELL2023	R4575675	Normal	Male	Frontal lobe
45b02e1d-c0e2-4aba-a8c4-2e9418ec2cfc	37217978	45b02e1d-c0e2-4aba-a8c4-2e9418ec2cfc	Normal	Female	Cerebellum
H19.30.002_MTG	37824655	H19.30.002_MTG	Normal	Male	Temporal lobe
R2793780	ROSMAP_NATURE2024b	R2793780	PART	Female	Frontal lobe
10X215_8	37824663	10X215_8	Normal	Male	Cerebral cortex
R4790045	ROSMAP_NATURE2024b	R4790045	AD	Male	Frontal lobe
10X219_6	37824663	10X219_6	Normal	Male	Basal ganglia
R6887989	ROSMAP_NATURE2024b	R6887989	AD	Female	Frontal lobe
10X384_1	37824663	10X384_1	Normal	Male	Cerebral cortex
R5955028	ROSMAP_CELL2023	R5955028	AD	Female	Frontal lobe
3322	35513515	3322	Normal	Female	Basal ganglia
H21.33.044_10x 3' v3	SEA-AD_DLPFC	H21.33.044_10x 3' v3	AD	Female	Frontal lobe
H19.30.004_ANG	37824655	H19.30.004_ANG	Normal	Male	Parietal lobe
R6268135	ROSMAP_NATURE2024b	R6268135	AD	Male	Frontal lobe
15bf760a-6915-4f0b-9b52-d968ba6c7775	37217978	15bf760a-6915-4f0b-9b52-d968ba6c7775	Normal	Female	Cerebellum
10X204_3	37824663	10X204_3	Normal	Male	Medulla
s3	GSE254569	s3	Schizophrenia	Female	Frontal lobe
R1028639	ROSMAP_CELL2023	R1028639	AD	Male	Frontal lobe
10X204_2	37824663	10X204_2	Normal	Male	Basal ganglia
9029c10a-6365-4441-ad61-3d0d108b6862	37217978	9029c10a-6365-4441-ad61-3d0d108b6862	Normal	Male	Frontal lobe
R7721691	ROSMAP_CELL2023	R7721691	Normal	Male	Frontal lobe
R4147686	ROSMAP_CELL2023	R4147686	AD	Male	Frontal lobe
210526_PN_304_snRNA-D10	Syn51105515	210526_PN_304_snRNA-D10	Normal	Female	Frontal lobe
10X276_8	37824663	10X276_8	Normal	Male	Cerebral cortex
10X377_3	37824663	10X377_3	Normal	Male	Thalamus
R8075334	ROSMAP_NATURE2024b	R8075334	Normal	Male	Frontal lobe
H21.33.006_10x multiome	SEA-AD_MTG	H21.33.006_10x multiome	AD	Male	Temporal lobe
10X264_2	37824663	10X264_2	Normal	Male	Cerebral cortex
3873	35513515	3873	Parkinson's disease	Female	Basal ganglia
210526_FTLD_214_snRNA-B12	Syn51105515	210526_FTLD_214_snRNA-B12	Frontotemporal lobar degeneration	Female	Frontal lobe
R3948425	ROSMAP_NATURE2024b	R3948425	PART	Male	Frontal lobe
R8202775	ROSMAP_NATURE2024b	R8202775	Resilience	Female	Frontal lobe
NC15	GSE157827	NC15	Normal	Female	Frontal lobe
210526_ALS_124_snRNA-A11	Syn51105515	210526_ALS_124_snRNA-A11	Amyotrophic lateral sclerosis	Male	Frontal lobe
s61	GSE254569	s61	Normal	Male	Frontal lobe
R1571066	ROSMAP_CELL2023	R1571066	AD	Male	Frontal lobe
R6216782	ROSMAP_NATURE2024b	R6216782	PART	Female	Frontal lobe
10X159_2	37824663	10X159_2	Normal	Female	Cerebral cortex
H20.33.017_10x multiome	SEA-AD_MTG	H20.33.017_10x multiome	AD	Male	Temporal lobe
G1	ADRD_multiome	G1	AD	Female	Cerebellum
R8781115	ROSMAP_CELL2023	R8781115	Resilience	Male	Frontal lobe
R2111091	ROSMAP_NATURE2024b	R2111091	AD	Female	Frontal lobe
10X215_7	37824663	10X215_7	Normal	Male	Cerebral cortex
R7995082	ROSMAP_CELL2023	R7995082	AD	Female	Frontal lobe
10X248_8	37824663	10X248_8	Normal	Male	Cerebral cortex
R7851092	ROSMAP_NATURE2024b	R7851092	AD	Female	Frontal lobe
R3741788	ROSMAP_NATURE2024b	R3741788	Resilience	Male	Frontal lobe
10X159_1	37824663	10X159_1	Normal	Female	Cerebral cortex
10X222_2	37824663	10X222_2	Normal	Male	Cerebral cortex
R3739042	ROSMAP_CELL2023	R3739042	AD	Female	Frontal lobe
191114_PN_324_snRNA-F7	Syn51105515	191114_PN_324_snRNA-F7	Normal	Male	Frontal lobe
R8572172	ROSMAP_CELL2023	R8572172	Normal	Female	Frontal lobe
10X241_3	37824663	10X241_3	Normal	Male	Cerebral cortex
R2830542	ROSMAP_NATURE2024b	R2830542	AD	Female	Frontal lobe
R6253512	ROSMAP_NATURE2024b	R6253512	AD	Female	Frontal lobe
H18.30.001_M1	37824655	H18.30.001_M1	Normal	Female	Frontal lobe
R4289838	ROSMAP_CELL2023	R4289838	Resilience	Male	Frontal lobe
R7334123	ROSMAP_CELL2023	R7334123	Normal	Male	Frontal lobe
H20.33.020_10x 3' v3	SEA-AD_MTG	H20.33.020_10x 3' v3	AD	Male	Temporal lobe
10X388_2	37824663	10X388_2	Normal	Male	Medulla
R1627792	ROSMAP_NATURE2024b	R1627792	AD	Female	Frontal lobe
10X348_4	37824663	10X348_4	Normal	Male	Thalamus
R1020037	ROSMAP_NATURE2024b	R1020037	PART	Female	Frontal lobe
10X265_6	37824663	10X265_6	Normal	Male	Cerebral cortex
10X393_3	37824663	10X393_3	Normal	Male	Limbic lobe
10X240_4	37824663	10X240_4	Normal	Male	Cerebral cortex
10X145_3	37824663	10X145_3	Normal	Male	Basal ganglia
10X265_5	37824663	10X265_5	Normal	Male	Cerebral cortex
R5636935	ROSMAP_NATURE2024b	R5636935	PART	Female	Frontal lobe
R1028639	ROSMAP_NATURE2024b	R1028639	AD	Male	Frontal lobe
10X182_2	37824663	10X182_2	Normal	Male	Cerebral cortex
10X360_2	37824663	10X360_2	Normal	Male	Medulla
10X350_6	37824663	10X350_6	Normal	Male	Basal ganglia
H21.33.020_10x 3' v3	SEA-AD_MTG	H21.33.020_10x 3' v3	AD	Male	Temporal lobe
Donor15OC	GSE148822	Donor15OC	AD	Female	Occipital lobe
H200.1023_DLPFC	37824655	H200.1023_DLPFC	Normal	Female	Frontal lobe
10X318_1	37824663	10X318_1	Normal	Male	Cerebral cortex
10X159_7	37824663	10X159_7	Normal	Male	Cerebral cortex
R6600608	ROSMAP_NATURE2024b	R6600608	AD	Female	Frontal lobe
H19.30.002_A1	37824655	H19.30.002_A1	Normal	Male	Temporal lobe
H20.33.002_10x multiome	SEA-AD_MTG	H20.33.002_10x multiome	PART	Female	Temporal lobe
R9072353	ROSMAP_NATURE2024b	R9072353	PART	Female	Frontal lobe
R9307768	ROSMAP_CELL2023	R9307768	PART	Male	Frontal lobe
R4470253	ROSMAP_CELL2023	R4470253	Resilience	Male	Frontal lobe
10X215_5	37824663	10X215_5	Normal	Male	Cerebral cortex
G13	ADRD_multiome	G13	Normal	Female	Cerebellum
R9064073	ROSMAP_NATURE2024b	R9064073	AD	Female	Frontal lobe
R6284240	ROSMAP_CELL2023	R6284240	PART	Female	Frontal lobe
a16be9ab-1a4d-4432-aeff-f20040c9c823	37217978	a16be9ab-1a4d-4432-aeff-f20040c9c823	Normal	Male	Cerebellum
10X387_6	37824663	10X387_6	Normal	Male	Limbic lobe
10X248_3	37824663	10X248_3	Normal	Male	Cerebral cortex
R4042599	ROSMAP_CELL2023	R4042599	AD	Female	Frontal lobe
R5693901	ROSMAP_NATURE2024b	R5693901	AD	Male	Frontal lobe
10X229_6	37824663	10X229_6	Normal	Male	Limbic lobe
H21.33.015_10x 3' v3	SEA-AD_DLPFC	H21.33.015_10x 3' v3	Normal	Male	Frontal lobe
R5053212	ROSMAP_NATURE2024b	R5053212	AD	Male	Frontal lobe
10X264_5	37824663	10X264_5	Normal	Male	Cerebral cortex
R3811781	ROSMAP_CELL2023	R3811781	PART	Male	Frontal lobe
6da82519-284b-41a3-ad08-21395427e6b7	37217978	6da82519-284b-41a3-ad08-21395427e6b7	Normal	Female	Spinal cord
s.0128	GSE243639	s.0128	Normal	Female	Basal ganglia
10X277_7	37824663	10X277_7	Normal	Male	Cerebral cortex
H20.33.030_10x 3' v3	SEA-AD_DLPFC	H20.33.030_10x 3' v3	AD	Female	Frontal lobe
210526_ALS_111_snRNA-A1	Syn51105515	210526_ALS_111_snRNA-A1	Amyotrophic lateral sclerosis	Female	Frontal lobe
R7915228	ROSMAP_CELL2023	R7915228	PART	Male	Frontal lobe
10X391_1	37824663	10X391_1	Normal	Male	Medulla
s.0116	GSE243639	s.0116	Parkinson's disease	Male	Basal ganglia
10X146_4	37824663	10X146_4	Normal	Male	Cerebral cortex
H21.33.012_10x 3' v3	SEA-AD_DLPFC	H21.33.012_10x 3' v3	AD	Female	Frontal lobe
R6086139	ROSMAP_NATURE2024b	R6086139	PART	Male	Frontal lobe
210526_FTLD_238_snRNA-D4	Syn51105515	210526_FTLD_238_snRNA-D4	Frontotemporal lobar degeneration	Female	Frontal lobe
s83	GSE254569	s83	Normal	Female	Frontal lobe
10X360_8	37824663	10X360_8	Normal	Male	Hypothalamus
R7791442	ROSMAP_NATURE2024b	R7791442	AD	Female	Frontal lobe
R6337324	ROSMAP_NATURE2024b	R6337324	Normal	Male	Frontal lobe
10X384_3	37824663	10X384_3	Normal	Male	Cerebral cortex
R4087141	ROSMAP_NATURE2024b	R4087141	AD	Female	Frontal lobe
PDC016 SSC	GSE160936	PDC016 SSC	Normal	Female	Parietal lobe
R2830542	ROSMAP_CELL2023	R2830542	AD	Female	Frontal lobe
R8444624	ROSMAP_NATURE2024b	R8444624	Normal	Female	Frontal lobe
R1326552	ROSMAP_CELL2023	R1326552	Normal	Male	Frontal lobe
R6939699	ROSMAP_CELL2023	R6939699	Normal	Male	Frontal lobe
10X391_5	37824663	10X391_5	Normal	Male	Cerebral cortex
10X382_5	37824663	10X382_5	Normal	Male	Cerebral cortex
10X356_7	37824663	10X356_7	Normal	Male	Basal ganglia
s.0165	GSE243639	s.0165	Normal	Male	Basal ganglia
R5935442	ROSMAP_NATURE2024b	R5935442	Normal	Female	Frontal lobe
10X354_1	37824663	10X354_1	Normal	Male	Midbrain
H18.30.001_DLPFC	37824655	H18.30.001_DLPFC	Normal	Female	Frontal lobe
10X265_2	37824663	10X265_2	Normal	Male	Cerebral cortex
H21.33.045_10x 3' v3	SEA-AD_MTG	H21.33.045_10x 3' v3	AD	Female	Temporal lobe
R5573393	ROSMAP_CELL2023	R5573393	AD	Female	Frontal lobe
s14	GSE254569	s14	Schizoaffective disorder	Female	Frontal lobe
R9047934	ROSMAP_CELL2023	R9047934	PART	Female	Frontal lobe
R4641987	ROSMAP_NATURE2024b	R4641987	PART	Male	Frontal lobe
210526_FTLD_232_snRNA-C11	Syn51105515	210526_FTLD_232_snRNA-C11	Frontotemporal lobar degeneration	Female	Frontal lobe
R9255058	ROSMAP_CELL2023	R9255058	AD	Male	Frontal lobe
R7029629	ROSMAP_NATURE2024b	R7029629	PART	Male	Frontal lobe
10X356_3	37824663	10X356_3	Normal	Male	Cerebellum
10X350_8	37824663	10X350_8	Normal	Male	Basal ganglia
R5505495	ROSMAP_CELL2023	R5505495	Resilience	Male	Frontal lobe
R9500594	ROSMAP_CELL2023	R9500594	Resilience	Male	Frontal lobe
H21.33.021_10x 3' v3	SEA-AD_DLPFC	H21.33.021_10x 3' v3	AD	Male	Frontal lobe
s54	GSE254569	s54	Normal	Male	Frontal lobe
H20.33.034_10x 3' v3	SEA-AD_DLPFC	H20.33.034_10x 3' v3	AD	Female	Frontal lobe
R6132310	ROSMAP_NATURE2024b	R6132310	AD	Female	Frontal lobe
Donor6OC	GSE148822	Donor6OC	Normal	Male	Occipital lobe
10X269_8	37824663	10X269_8	Normal	Male	Cerebral cortex
R5766881	ROSMAP_CELL2023	R5766881	AD	Female	Frontal lobe
10X385_7	37824663	10X385_7	Normal	Male	Limbic lobe
NMA22-152	ADRD_multiome	NMA22-152	AD	Female	Cerebellum
s77	GSE254569	s77	Bipolar disorder	Male	Frontal lobe
10X229_3	37824663	10X229_3	Normal	Male	Limbic lobe
53702565-71d1-4d5b-990c-a2209d3a0edc	37217978	53702565-71d1-4d5b-990c-a2209d3a0edc	Normal	Female	Frontal lobe
10X381_1	37824663	10X381_1	Normal	Male	Pons
R2110067	ROSMAP_CELL2023	R2110067	Resilience	Male	Frontal lobe
H21.33.030_10x 3' v3	SEA-AD_MTG	H21.33.030_10x 3' v3	AD	Male	Temporal lobe
s18	GSE254569	s18	Normal	Male	Frontal lobe
10X379_5	37824663	10X379_5	Normal	Male	Cerebral cortex
R5234179	ROSMAP_NATURE2024b	R5234179	Normal	Male	Frontal lobe
s62	GSE254569	s62	Clinical depression	Female	Frontal lobe
R3381702	ROSMAP_CELL2023	R3381702	AD	Male	Frontal lobe
10X203_1	37824663	10X203_1	Normal	Male	Thalamus
MS122	30747918	MS122	Multiple sclerosis	Male	Unspecified
210526_PN_328_snRNA-F6	Syn51105515	210526_PN_328_snRNA-F6	Normal	Male	Frontal lobe
R7272395	ROSMAP_CELL2023	R7272395	Normal	Female	Frontal lobe
R8937093	ROSMAP_NATURE2024b	R8937093	AD	Female	Frontal lobe
10X349_2	37824663	10X349_2	Normal	Male	Cerebral cortex
10X376_7	37824663	10X376_7	Normal	Male	Cerebral cortex
10X359_6	37824663	10X359_6	Normal	Male	Pons
R1721075	ROSMAP_CELL2023	R1721075	Resilience	Male	Frontal lobe
R6820248	ROSMAP_NATURE2024b	R6820248	AD	Female	Frontal lobe
Case56_anterior	34051145	Case56_anterior	Epilepsy	Female	Limbic lobe
10X191_6	37824663	10X191_6	Normal	Male	Limbic lobe
10X381_4	37824663	10X381_4	Normal	Male	Cerebral cortex
R1407047	ROSMAP_CELL2023	R1407047	PART	Male	Frontal lobe
R9652199	ROSMAP_CELL2023	R9652199	Resilience	Female	Frontal lobe
10X192_3	37824663	10X192_3	Normal	Male	Limbic lobe
R9817056	ROSMAP_NATURE2024b	R9817056	Normal	Male	Frontal lobe
AD21	GSE157827	AD21	AD	Male	Frontal lobe
10X329_2	37824663	10X329_2	Normal	Male	Cerebral cortex
R9163526	ROSMAP_CELL2023	R9163526	PART	Male	Frontal lobe
3887	35513515	3887	Parkinson's disease	Male	Basal ganglia
6173	35513515	6173	Normal	Male	Basal ganglia
AD-MAP2-4	GSE129308	AD-MAP2-4	AD	Female	Frontal lobe
H20.33.029_10x 3' v3	SEA-AD_DLPFC	H20.33.029_10x 3' v3	AD	Female	Frontal lobe
R7366225	ROSMAP_NATURE2024b	R7366225	AD	Female	Frontal lobe
R7551006	ROSMAP_NATURE2024b	R7551006	PART	Female	Frontal lobe
R4174623	ROSMAP_NATURE2024b	R4174623	Resilience	Male	Frontal lobe
Donor4OC	GSE148822	Donor4OC	Normal	Male	Occipital lobe
R2670295	ROSMAP_NATURE2024b	R2670295	AD	Female	Frontal lobe
10X377_8	37824663	10X377_8	Normal	Male	Midbrain
G3	ADRD_multiome	G3	AD	Female	Cerebellum
10X228_4	37824663	10X228_4	Normal	Male	Cerebral cortex
R3201576	ROSMAP_CELL2023	R3201576	Resilience	Male	Frontal lobe
R6226355	ROSMAP_CELL2023	R6226355	AD	Female	Frontal lobe
210526_FTLD_217_snRNA-C2	Syn51105515	210526_FTLD_217_snRNA-C2	Frontotemporal lobar degeneration	Male	Frontal lobe
R7334123	ROSMAP_NATURE2024b	R7334123	Normal	Male	Frontal lobe
R5221394	ROSMAP_CELL2023	R5221394	PART	Male	Frontal lobe
R7993799	ROSMAP_CELL2023	R7993799	AD	Female	Frontal lobe
CO39	30747918	CO39	Normal	Male	Unspecified
R7641350	ROSMAP_CELL2023	R7641350	Normal	Male	Frontal lobe
R6267541	ROSMAP_CELL2023	R6267541	PART	Female	Frontal lobe
s10	GSE254569	s10	Normal	Male	Frontal lobe
ALS17	ALS_multiome	ALS17	Amyotrophic lateral sclerosis	Female	Frontal lobe
10X265_1	37824663	10X265_1	Normal	Male	Cerebral cortex
Donor6OTC	GSE148822	Donor6OTC	Normal	Male	Occipital lobe
10X191_3	37824663	10X191_3	Normal	Male	Thalamus
10X241_6	37824663	10X241_6	Normal	Male	Cerebral cortex
210526_FTLD_236_snRNA-D2	Syn51105515	210526_FTLD_236_snRNA-D2	Frontotemporal lobar degeneration	Female	Frontal lobe
Donor13OTC	GSE148822	Donor13OTC	AD	Female	Occipital lobe
R9163526	ROSMAP_NATURE2024b	R9163526	PART	Male	Frontal lobe
10X215_1	37824663	10X215_1	Normal	Male	Cerebral cortex
R1173111	ROSMAP_NATURE2024b	R1173111	AD	Female	Frontal lobe
R2157677	ROSMAP_CELL2023	R2157677	AD	Female	Frontal lobe
CTRL-7	GSE129308	CTRL-7	Normal	Female	Frontal lobe
R9583560	ROSMAP_CELL2023	R9583560	AD	Male	Frontal lobe
191112_ALS_112_snRNA-D1	Syn51105515	191112_ALS_112_snRNA-D1	Amyotrophic lateral sclerosis	Female	Frontal lobe
G4	ADRD_multiome	G4	Progressive supranuclear palsy	Male	Cerebellum
R7039412	ROSMAP_CELL2023	R7039412	Normal	Male	Frontal lobe
10X217_6	37824663	10X217_6	Normal	Male	Pons
10X222_8	37824663	10X222_8	Normal	Male	Limbic lobe
10X357_1	37824663	10X357_1	Normal	Male	Basal ganglia
H20.33.031_10x 3' v3	SEA-AD_DLPFC	H20.33.031_10x 3' v3	AD	Female	Frontal lobe
10X330_6	37824663	10X330_6	Normal	Male	Cerebral cortex
R7070153	ROSMAP_CELL2023	R7070153	AD	Female	Frontal lobe
10X393_8	37824663	10X393_8	Normal	Male	Basal ganglia
R6728038	ROSMAP_CELL2023	R6728038	Resilience	Male	Frontal lobe
R1617674	ROSMAP_NATURE2024b	R1617674	AD	Female	Frontal lobe
10X358_4	37824663	10X358_4	Normal	Male	Midbrain
Sample-47	GSE174367	Sample-47	AD	Male	Frontal lobe
R1262106	ROSMAP_NATURE2024b	R1262106	AD	Female	Frontal lobe
R5334541	ROSMAP_CELL2023	R5334541	Resilience	Female	Frontal lobe
10X206_8	37824663	10X206_8	Normal	Male	Limbic lobe
R9255058	ROSMAP_NATURE2024b	R9255058	AD	Male	Frontal lobe
R7516349	ROSMAP_NATURE2024b	R7516349	AD	Female	Frontal lobe
R7738727	ROSMAP_CELL2023	R7738727	AD	Female	Frontal lobe
R4790045	ROSMAP_CELL2023	R4790045	AD	Male	Frontal lobe
210526_PN_325_snRNA-F5	Syn51105515	210526_PN_325_snRNA-F5	Normal	Male	Frontal lobe
R5483154	ROSMAP_CELL2023	R5483154	Normal	Male	Frontal lobe
3346	35513515	3346	Normal	Female	Basal ganglia
H20.33.014_10x 3' v3	SEA-AD_MTG	H20.33.014_10x 3' v3	AD	Female	Temporal lobe
H20.33.008_10x multiome	SEA-AD_DLPFC	H20.33.008_10x multiome	AD	Female	Frontal lobe
R8415954	ROSMAP_CELL2023	R8415954	AD	Female	Frontal lobe
s.0096	GSE243639	s.0096	Parkinson's disease	Female	Basal ganglia
191112_ALS_124_snRNA-A3	Syn51105515	191112_ALS_124_snRNA-A3	Amyotrophic lateral sclerosis	Male	Frontal lobe
R6058053	ROSMAP_CELL2023	R6058053	Normal	Male	Frontal lobe
R5196723	ROSMAP_CELL2023	R5196723	PART	Male	Frontal lobe
Sample-43	GSE174367	Sample-43	AD	Female	Frontal lobe
R6847727	ROSMAP_NATURE2024b	R6847727	AD	Female	Frontal lobe
s.0098	GSE243639	s.0098	Parkinson's disease	Male	Basal ganglia
10X349_8	37824663	10X349_8	Normal	Male	Cerebral cortex
R6912665	ROSMAP_CELL2023	R6912665	AD	Female	Frontal lobe
H20.33.028_10x 3' v3	SEA-AD_DLPFC	H20.33.028_10x 3' v3	AD	Female	Frontal lobe
H18.30.002_A1	37824655	H18.30.002_A1	Normal	Male	Temporal lobe
R6879714	ROSMAP_NATURE2024b	R6879714	PART	Male	Frontal lobe
H18.30.001_MTG	37824655	H18.30.001_MTG	Normal	Female	Temporal lobe
ALS8	ALS_multiome	ALS8	Amyotrophic lateral sclerosis	Female	Frontal lobe
10X227_4	37824663	10X227_4	Normal	Male	Medulla
R2992930	ROSMAP_NATURE2024b	R2992930	AD	Male	Frontal lobe
10X218_7	37824663	10X218_7	Normal	Male	Pons
10X270_2	37824663	10X270_2	Normal	Male	Cerebral cortex
H20.33.033_10x 3' v3	SEA-AD_MTG	H20.33.033_10x 3' v3	AD	Male	Temporal lobe
191114_PN_303_snRNA-E8	Syn51105515	191114_PN_303_snRNA-E8	Normal	Female	Frontal lobe
R3784607	ROSMAP_CELL2023	R3784607	AD	Female	Frontal lobe
Sample-96	GSE174367	Sample-96	Normal	Male	Frontal lobe
10X386_6	37824663	10X386_6	Normal	Male	Pons
10X224_1	37824663	10X224_1	Normal	Male	Limbic lobe
Donor2OC	GSE148822	Donor2OC	Normal	Male	Occipital lobe
R8451530	ROSMAP_NATURE2024b	R8451530	AD	Male	Frontal lobe
R3824126	ROSMAP_CELL2023	R3824126	PART	Female	Frontal lobe
10X237_2	37824663	10X237_2	Normal	Male	Cerebellum
10X203_3	37824663	10X203_3	Normal	Male	Limbic lobe
H21.33.027_10x 3' v3	SEA-AD_DLPFC	H21.33.027_10x 3' v3	AD	Male	Frontal lobe
10X237_3	37824663	10X237_3	Normal	Male	Midbrain
R9781891	ROSMAP_CELL2023	R9781891	Resilience	Female	Frontal lobe
H21.33.029_10x 3' v3	SEA-AD_MTG	H21.33.029_10x 3' v3	AD	Male	Temporal lobe
R1412995	ROSMAP_NATURE2024b	R1412995	AD	Female	Frontal lobe
10X319_5	37824663	10X319_5	Normal	Male	Basal ganglia
10X354_4	37824663	10X354_4	Normal	Male	Cerebral cortex
10X146_5	37824663	10X146_5	Normal	Male	Cerebral cortex
10X192_8	37824663	10X192_8	Normal	Male	Hypothalamus
H21.33.047_10x 3' v3	SEA-AD_DLPFC	H21.33.047_10x 3' v3	AD	Male	Frontal lobe
a2b36b49-0ddf-470f-83ec-6d3963b7abc7	37217978	a2b36b49-0ddf-470f-83ec-6d3963b7abc7	Normal	Male	Cerebellum
10X205_4	37824663	10X205_4	Normal	Male	Pons
AD20	GSE157827	AD20	AD	Male	Frontal lobe
s41	GSE254569	s41	Bipolar disorder	Female	Frontal lobe
10X176_4	37824663	10X176_4	Normal	Male	Pons
CTRL-4	GSE129308	CTRL-4	Normal	Female	Frontal lobe
R8662866	ROSMAP_CELL2023	R8662866	PART	Female	Frontal lobe
H21.33.040_10x 3' v3	SEA-AD_DLPFC	H21.33.040_10x 3' v3	AD	Male	Frontal lobe
R5907586	ROSMAP_CELL2023	R5907586	Normal	Female	Frontal lobe
R3757880	ROSMAP_NATURE2024b	R3757880	Resilience	Female	Frontal lobe
10X203_4	37824663	10X203_4	Normal	Male	Limbic lobe
R6415047	ROSMAP_NATURE2024b	R6415047	AD	Male	Frontal lobe
10X192_6	37824663	10X192_6	Normal	Male	Limbic lobe
10X330_7	37824663	10X330_7	Normal	Male	Midbrain
R9053141	ROSMAP_NATURE2024b	R9053141	Resilience	Female	Frontal lobe
H20.33.045_10x 3' v3	SEA-AD_MTG	H20.33.045_10x 3' v3	AD	Female	Temporal lobe
R7920516	ROSMAP_CELL2023	R7920516	Normal	Female	Frontal lobe
A19-178	ADRD_multiome	A19-178	AD	Male	Cerebellum
H20.33.039_10x 3' v3	SEA-AD_DLPFC	H20.33.039_10x 3' v3	AD	Female	Frontal lobe
s37	GSE254569	s37	Clinical depression	Male	Frontal lobe
R5676537	ROSMAP_NATURE2024b	R5676537	AD	Female	Frontal lobe
H20.33.034_10x 3' v3	SEA-AD_MTG	H20.33.034_10x 3' v3	AD	Female	Temporal lobe
R2264515	ROSMAP_CELL2023	R2264515	AD	Female	Frontal lobe
10X182_4	37824663	10X182_4	Normal	Male	Basal ganglia
R9127940	ROSMAP_CELL2023	R9127940	PART	Female	Frontal lobe
10X348_2	37824663	10X348_2	Normal	Male	Thalamus
10X264_4	37824663	10X264_4	Normal	Male	Cerebral cortex
10X385_4	37824663	10X385_4	Normal	Male	Basal ganglia
10X387_4	37824663	10X387_4	Normal	Male	Pons
AD1	GSE157827	AD1	AD	Male	Frontal lobe
R7039412	ROSMAP_NATURE2024b	R7039412	Normal	Male	Frontal lobe
R9585968	ROSMAP_CELL2023	R9585968	PART	Male	Frontal lobe
96c86a6e-f13b-423f-91a0-9d6a06c59060	37217978	96c86a6e-f13b-423f-91a0-9d6a06c59060	Normal	Male	Cerebellum
10X376_3	37824663	10X376_3	Normal	Male	Cerebral cortex
10X269_4	37824663	10X269_4	Normal	Male	Cerebral cortex
R2803490	ROSMAP_CELL2023	R2803490	AD	Female	Frontal lobe
R7286984	ROSMAP_NATURE2024b	R7286984	Normal	Male	Frontal lobe
H20.33.005_10x multiome	SEA-AD_DLPFC	H20.33.005_10x multiome	AD	Female	Frontal lobe
10X389_1	37824663	10X389_1	Normal	Male	Hypothalamus
H20.33.039_10x 3' v3	SEA-AD_MTG	H20.33.039_10x 3' v3	AD	Female	Temporal lobe
210526_FTLD_226_snRNA-C7	Syn51105515	210526_FTLD_226_snRNA-C7	Frontotemporal lobar degeneration	Male	Frontal lobe
200721_PN_302_snRNA-B4	Syn51105515	200721_PN_302_snRNA-B4	Normal	Female	Frontal lobe
R8608442	ROSMAP_NATURE2024b	R8608442	AD	Male	Frontal lobe
R5893965	ROSMAP_NATURE2024b	R5893965	AD	Female	Frontal lobe
10X419_3	37824663	10X419_3	Normal	Male	Basal ganglia
0d6a39d0-eed9-4ae4-bd29-3b1d1376d36d	37217978	0d6a39d0-eed9-4ae4-bd29-3b1d1376d36d	Normal	Male	Spinal cord
H20.33.004_10x 3' v3	SEA-AD_DLPFC	H20.33.004_10x 3' v3	AD	Male	Frontal lobe
R8983137	ROSMAP_CELL2023	R8983137	PART	Female	Frontal lobe
G7	ADRD_multiome	G7	Lewy body dementia	Male	Cerebellum
R5574987	ROSMAP_NATURE2024b	R5574987	AD	Female	Frontal lobe
R3997006	ROSMAP_CELL2023	R3997006	AD	Male	Frontal lobe
R9101940	ROSMAP_NATURE2024b	R9101940	Normal	Female	Frontal lobe
R4482444	ROSMAP_CELL2023	R4482444	PART	Female	Frontal lobe
H21.33.042_10x 3' v3	SEA-AD_DLPFC	H21.33.042_10x 3' v3	AD	Female	Frontal lobe
Sample-52	GSE174367	Sample-52	Normal	Male	Frontal lobe
CTRL-1	GSE129308	CTRL-1	Normal	Male	Frontal lobe
H20.33.028_10x multiome	SEA-AD_MTG	H20.33.028_10x multiome	AD	Female	Temporal lobe
R5184427	ROSMAP_CELL2023	R5184427	AD	Female	Frontal lobe
210910_MCX_ALS_138_snRNA-C9	Syn51105515	210910_MCX_ALS_138_snRNA-C9	Amyotrophic lateral sclerosis	Female	Frontal lobe
R4439627	ROSMAP_NATURE2024b	R4439627	Normal	Male	Frontal lobe
R4854051	ROSMAP_CELL2023	R4854051	AD	Female	Frontal lobe
R2237803	ROSMAP_CELL2023	R2237803	Normal	Female	Frontal lobe
210526_FTLD_240_snRNA-D6	Syn51105515	210526_FTLD_240_snRNA-D6	Frontotemporal lobar degeneration	Male	Frontal lobe
R4146432	ROSMAP_CELL2023	R4146432	Resilience	Male	Frontal lobe
H21.33.018_10x 3' v3	SEA-AD_MTG	H21.33.018_10x 3' v3	Normal	Female	Temporal lobe
R8774534	ROSMAP_CELL2023	R8774534	Normal	Female	Frontal lobe
R4619330	ROSMAP_NATURE2024b	R4619330	AD	Female	Frontal lobe
10X330_5	37824663	10X330_5	Normal	Male	Cerebral cortex
R1287407	ROSMAP_NATURE2024b	R1287407	AD	Female	Frontal lobe
210526_FTLD_228_snRNA-C8	Syn51105515	210526_FTLD_228_snRNA-C8	Frontotemporal lobar degeneration	Male	Frontal lobe
R2709337	ROSMAP_NATURE2024b	R2709337	AD	Female	Frontal lobe
R4602424	ROSMAP_NATURE2024b	R4602424	AD	Male	Frontal lobe
10X241_7	37824663	10X241_7	Normal	Male	Cerebral cortex
Donor5OTC	GSE148822	Donor5OTC	Normal	Female	Occipital lobe
Sample-50	GSE174367	Sample-50	AD	Female	Frontal lobe
191114_PN_307_snRNA-E11	Syn51105515	191114_PN_307_snRNA-E11	Normal	Female	Frontal lobe
Donor4OTC	GSE148822	Donor4OTC	Normal	Male	Occipital lobe
H21.33.008_10x 3' v3	SEA-AD_DLPFC	H21.33.008_10x 3' v3	AD	Female	Frontal lobe
R5405023	ROSMAP_NATURE2024b	R5405023	AD	Female	Frontal lobe
R5992638	ROSMAP_NATURE2024b	R5992638	Resilience	Female	Frontal lobe
10X375_6	37824663	10X375_6	Normal	Male	Basal ganglia
s.0142	GSE243639	s.0142	Normal	Male	Basal ganglia
R3442506	ROSMAP_NATURE2024b	R3442506	PART	Female	Frontal lobe
R7347788	ROSMAP_NATURE2024b	R7347788	Normal	Male	Frontal lobe
R6312023	ROSMAP_CELL2023	R6312023	Resilience	Male	Frontal lobe
210910_MCX_ALS_136_snRNA-C7	Syn51105515	210910_MCX_ALS_136_snRNA-C7	Amyotrophic lateral sclerosis	Female	Frontal lobe
10X393_7	37824663	10X393_7	Normal	Male	Basal ganglia
R6665276	ROSMAP_NATURE2024b	R6665276	Normal	Female	Frontal lobe
s80	GSE254569	s80	Normal	Female	Frontal lobe
R3211474	ROSMAP_CELL2023	R3211474	AD	Male	Frontal lobe
R6476704	ROSMAP_CELL2023	R6476704	Normal	Female	Frontal lobe
10X174_7	37824663	10X174_7	Normal	Male	Cerebral cortex
191112_ALS_129_snRNA-A2	Syn51105515	191112_ALS_129_snRNA-A2	Amyotrophic lateral sclerosis	Male	Frontal lobe
R2166876	ROSMAP_NATURE2024b	R2166876	AD	Male	Frontal lobe
10X225_2	37824663	10X225_2	Normal	Male	Midbrain
210526_ALS_129_snRNA-B3	Syn51105515	210526_ALS_129_snRNA-B3	Amyotrophic lateral sclerosis	Male	Frontal lobe
10X215_4	37824663	10X215_4	Normal	Male	Cerebral cortex
dcd16d88-44e6-49d1-b167-7c9f02e0dd19	37217978	dcd16d88-44e6-49d1-b167-7c9f02e0dd19	Normal	Female	Spinal cord
R8155560	ROSMAP_NATURE2024b	R8155560	Normal	Female	Frontal lobe
H20.33.036_10x 3' v3	SEA-AD_DLPFC	H20.33.036_10x 3' v3	AD	Female	Frontal lobe
10X270_3	37824663	10X270_3	Normal	Male	Cerebral cortex
10X361_3	37824663	10X361_3	Normal	Male	Thalamus
R7066784	ROSMAP_NATURE2024b	R7066784	AD	Female	Frontal lobe
R2703808	ROSMAP_CELL2023	R2703808	Resilience	Female	Frontal lobe
10X192_7	37824663	10X192_7	Normal	Male	Hypothalamus
R3398943	ROSMAP_CELL2023	R3398943	Normal	Female	Frontal lobe
10X221_8	37824663	10X221_8	Normal	Male	Cerebral cortex
H21.33.014_10x 3' v3	SEA-AD_DLPFC	H21.33.014_10x 3' v3	AD	Male	Frontal lobe
H21.33.003_10x multiome	SEA-AD_DLPFC	H21.33.003_10x multiome	Normal	Male	Frontal lobe
R4516201	ROSMAP_NATURE2024b	R4516201	AD	Female	Frontal lobe
R3857147	ROSMAP_NATURE2024b	R3857147	AD	Female	Frontal lobe
210526_PN_324_snRNA-F4	Syn51105515	210526_PN_324_snRNA-F4	Normal	Male	Frontal lobe
s35	GSE254569	s35	Normal	Female	Frontal lobe
R7384738	ROSMAP_NATURE2024b	R7384738	AD	Female	Frontal lobe
191112_ALS_128_snRNA-A7	Syn51105515	191112_ALS_128_snRNA-A7	Amyotrophic lateral sclerosis	Male	Frontal lobe
210526_FTLD_204_snRNA-B6	Syn51105515	210526_FTLD_204_snRNA-B6	Frontotemporal lobar degeneration	Female	Frontal lobe
R7208968	ROSMAP_CELL2023	R7208968	AD	Male	Frontal lobe
s71	GSE254569	s71	Schizophrenia	Male	Frontal lobe
NC14	GSE157827	NC14	Normal	Female	Frontal lobe
R6604064	ROSMAP_NATURE2024b	R6604064	AD	Male	Frontal lobe
R6765868	ROSMAP_CELL2023	R6765868	Normal	Female	Frontal lobe
Sample-27	GSE174367	Sample-27	AD	Male	Frontal lobe
10X248_2	37824663	10X248_2	Normal	Male	Cerebral cortex
10X173_2	37824663	10X173_2	Normal	Male	Cerebral cortex
R1620679	ROSMAP_NATURE2024b	R1620679	PART	Female	Frontal lobe
H20.33.020_10x multiome	SEA-AD_MTG	H20.33.020_10x multiome	AD	Male	Temporal lobe
R7903817	ROSMAP_NATURE2024b	R7903817	Resilience	Female	Frontal lobe
s24	GSE254569	s24	Schizophrenia	Female	Frontal lobe
R5385855	ROSMAP_CELL2023	R5385855	AD	Female	Frontal lobe
10X277_8	37824663	10X277_8	Normal	Male	Cerebral cortex
AD-AT8-7	GSE129308	AD-AT8-7	AD	Female	Frontal lobe
A20-204	ADRD_multiome	A20-204	AD	Male	Cerebellum
10X265_3	37824663	10X265_3	Normal	Male	Cerebral cortex
10X248_6	37824663	10X248_6	Normal	Male	Cerebral cortex
R3035452	ROSMAP_CELL2023	R3035452	AD	Male	Frontal lobe
b2c704be-7449-4e04-9850-9cffc9ace23c	37217978	b2c704be-7449-4e04-9850-9cffc9ace23c	Normal	Male	Frontal lobe
s79	GSE254569	s79	Schizoaffective disorder	Female	Frontal lobe
10X388_5	37824663	10X388_5	Normal	Male	Limbic lobe
H21.33.011_10x 3' v3	SEA-AD_MTG	H21.33.011_10x 3' v3	PART	Female	Temporal lobe
10X218_4	37824663	10X218_4	Normal	Male	Cerebellum
R1743384	ROSMAP_NATURE2024b	R1743384	PART	Female	Frontal lobe
10X276_3	37824663	10X276_3	Normal	Male	Cerebral cortex
R7462671	ROSMAP_NATURE2024b	R7462671	Resilience	Female	Frontal lobe
R7594705	ROSMAP_CELL2023	R7594705	AD	Female	Frontal lobe
H21.33.043_10x 3' v3	SEA-AD_DLPFC	H21.33.043_10x 3' v3	Normal	Female	Frontal lobe
10X389_4	37824663	10X389_4	Normal	Male	Midbrain
191113_FTLD_207_snRNA-D5	Syn51105515	191113_FTLD_207_snRNA-D5	Frontotemporal lobar degeneration	Female	Frontal lobe
10X228_2	37824663	10X228_2	Normal	Male	Cerebral cortex
CTRL-6	GSE129308	CTRL-6	Normal	Male	Frontal lobe
R6913259	ROSMAP_CELL2023	R6913259	Resilience	Female	Frontal lobe
10X221_3	37824663	10X221_3	Normal	Male	Limbic lobe
10X269_6	37824663	10X269_6	Normal	Male	Cerebral cortex
H21.33.007_10x 3' v3	SEA-AD_MTG	H21.33.007_10x 3' v3	AD	Female	Temporal lobe
5610	35513515	5610	Normal	Female	Basal ganglia
R2169533	ROSMAP_CELL2023	R2169533	Normal	Female	Frontal lobe
H20.33.012_10x 3' v3	SEA-AD_MTG	H20.33.012_10x 3' v3	PART	Female	Temporal lobe
10X390_2	37824663	10X390_2	Normal	Male	Pons
s.0105	GSE243639	s.0105	Parkinson's disease	Male	Basal ganglia
191114_PN_323_snRNA-F6	Syn51105515	191114_PN_323_snRNA-F6	Normal	Male	Frontal lobe
R9679238	ROSMAP_NATURE2024b	R9679238	AD	Male	Frontal lobe
10X241_2	37824663	10X241_2	Normal	Male	Cerebral cortex
AD2	GSE157827	AD2	AD	Male	Frontal lobe
10X392_1	37824663	10X392_1	Normal	Male	Limbic lobe
10X221_5	37824663	10X221_5	Normal	Male	Cerebral cortex
10X192_2	37824663	10X192_2	Normal	Male	Thalamus
R6176158	ROSMAP_CELL2023	R6176158	PART	Female	Frontal lobe
R3579460	ROSMAP_NATURE2024b	R3579460	AD	Female	Frontal lobe
R1476204	ROSMAP_NATURE2024b	R1476204	AD	Female	Frontal lobe
R1980623	ROSMAP_NATURE2024b	R1980623	Resilience	Male	Frontal lobe
10X319_2	37824663	10X319_2	Normal	Male	Basal ganglia
R1944372	ROSMAP_CELL2023	R1944372	PART	Male	Frontal lobe
R5079107	ROSMAP_NATURE2024b	R5079107	Normal	Male	Frontal lobe
R2678902	ROSMAP_NATURE2024b	R2678902	Resilience	Female	Frontal lobe
10X217_8	37824663	10X217_8	Normal	Male	Pons
R9537646	ROSMAP_NATURE2024b	R9537646	AD	Female	Frontal lobe
10X206_2	37824663	10X206_2	Normal	Male	Limbic lobe
H21.33.019_10x multiome	SEA-AD_MTG	H21.33.019_10x multiome	Normal	Male	Temporal lobe
210526_ALS_101_snRNA-H5	Syn51105515	210526_ALS_101_snRNA-H5	Amyotrophic lateral sclerosis	Female	Frontal lobe
210526_FTLD_207_snRNA-B8	Syn51105515	210526_FTLD_207_snRNA-B8	Frontotemporal lobar degeneration	Female	Frontal lobe
G17	ADRD_multiome	G17	Normal	Female	Cerebellum
10X318_6	37824663	10X318_6	Normal	Male	Basal ganglia
10X205_8	37824663	10X205_8	Normal	Male	Basal ganglia
R8971831	ROSMAP_CELL2023	R8971831	AD	Male	Frontal lobe
10X384_7	37824663	10X384_7	Normal	Male	Limbic lobe
R1015854	ROSMAP_NATURE2024b	R1015854	PART	Female	Frontal lobe
R6070702	ROSMAP_NATURE2024b	R6070702	Normal	Female	Frontal lobe
H19.33.004_10x 3' v3	SEA-AD_MTG	H19.33.004_10x 3' v3	PART	Female	Temporal lobe
s1	GSE254569	s1	Schizophrenia	Male	Frontal lobe
H20.33.035_10x 3' v3	SEA-AD_MTG	H20.33.035_10x 3' v3	PART	Female	Temporal lobe
R4935546	ROSMAP_NATURE2024b	R4935546	Normal	Female	Frontal lobe
10X391_4	37824663	10X391_4	Normal	Male	Thalamus
Sample-33	GSE174367	Sample-33	AD	Male	Frontal lobe
191112_ALS_126_snRNA-A6	Syn51105515	191112_ALS_126_snRNA-A6	Amyotrophic lateral sclerosis	Male	Frontal lobe
A20-123	ADRD_multiome	A20-123	AD	Female	Cerebellum
R7876628	ROSMAP_NATURE2024b	R7876628	AD	Female	Frontal lobe
R2975126	ROSMAP_NATURE2024b	R2975126	Resilience	Female	Frontal lobe
s.0110	GSE243639	s.0110	Parkinson's disease	Male	Basal ganglia
10X330_8	37824663	10X330_8	Normal	Male	Midbrain
210526_PN_302_snRNA-D8	Syn51105515	210526_PN_302_snRNA-D8	Normal	Female	Frontal lobe
R4602424	ROSMAP_CELL2023	R4602424	AD	Male	Frontal lobe
AD-MAP2-6	GSE129308	AD-MAP2-6	AD	Male	Frontal lobe
R2581860	ROSMAP_CELL2023	R2581860	Normal	Male	Frontal lobe
R2246117	ROSMAP_NATURE2024b	R2246117	AD	Female	Frontal lobe
R7047807	ROSMAP_NATURE2024b	R7047807	Normal	Male	Frontal lobe
R5394614	ROSMAP_NATURE2024b	R5394614	AD	Female	Frontal lobe
R3877498	ROSMAP_NATURE2024b	R3877498	AD	Male	Frontal lobe
R2709337	ROSMAP_CELL2023	R2709337	AD	Female	Frontal lobe
R4689636	ROSMAP_CELL2023	R4689636	Normal	Male	Frontal lobe
10X359_4	37824663	10X359_4	Normal	Male	Thalamus
H20.33.035_10x multiome	SEA-AD_DLPFC	H20.33.035_10x multiome	PART	Female	Frontal lobe
210526_PN_323_snRNA-B7	Syn51105515	210526_PN_323_snRNA-B7	Normal	Male	Frontal lobe
10X222_1	37824663	10X222_1	Normal	Male	Cerebral cortex
4923bb84-d0b7-4433-845d-79704bc95f06	37217978	4923bb84-d0b7-4433-845d-79704bc95f06	Normal	Male	Cerebellum
H21.33.035_10x 3' v3	SEA-AD_MTG	H21.33.035_10x 3' v3	AD	Female	Temporal lobe
H20.33.016_10x multiome	SEA-AD_MTG	H20.33.016_10x multiome	AD	Female	Temporal lobe
10X219_5	37824663	10X219_5	Normal	Male	Basal ganglia
R6627307	ROSMAP_NATURE2024b	R6627307	AD	Male	Frontal lobe
10X205_5	37824663	10X205_5	Normal	Male	Basal ganglia
10X393_5	37824663	10X393_5	Normal	Male	Cerebellum
R6289070	ROSMAP_NATURE2024b	R6289070	PART	Female	Frontal lobe
191112_ALS_116_snRNA-C2	Syn51105515	191112_ALS_116_snRNA-C2	Amyotrophic lateral sclerosis	Male	Frontal lobe
R1015854	ROSMAP_CELL2023	R1015854	PART	Female	Frontal lobe
10X362_2	37824663	10X362_2	Normal	Male	Thalamus
R2086195	ROSMAP_NATURE2024b	R2086195	AD	Female	Frontal lobe
s17	GSE254569	s17	Schizophrenia	Female	Frontal lobe
10X229_5	37824663	10X229_5	Normal	Male	Limbic lobe
10X249_1	37824663	10X249_1	Normal	Male	Cerebral cortex
10X353_6	37824663	10X353_6	Normal	Male	Basal ganglia
R9088015	ROSMAP_CELL2023	R9088015	AD	Male	Frontal lobe
R4042599	ROSMAP_NATURE2024b	R4042599	AD	Female	Frontal lobe
R3086211	ROSMAP_CELL2023	R3086211	AD	Male	Frontal lobe
H20.33.025_10x multiome	SEA-AD_MTG	H20.33.025_10x multiome	AD	Male	Temporal lobe
R2494273	ROSMAP_NATURE2024b	R2494273	PART	Female	Frontal lobe
10X218_1	37824663	10X218_1	Normal	Male	Spinal cord
10X243_2	37824663	10X243_2	Normal	Male	Cerebellum
R5385855	ROSMAP_NATURE2024b	R5385855	AD	Female	Frontal lobe
R5499256	ROSMAP_NATURE2024b	R5499256	AD	Female	Frontal lobe
R5907586	ROSMAP_NATURE2024b	R5907586	Normal	Female	Frontal lobe
R9324027	ROSMAP_NATURE2024b	R9324027	Normal	Female	Frontal lobe
Donor5OC	GSE148822	Donor5OC	Normal	Female	Occipital lobe
R3426726	ROSMAP_NATURE2024b	R3426726	AD	Female	Frontal lobe
10X160_1	37824663	10X160_1	Normal	Male	Cerebral cortex
R6698302	ROSMAP_NATURE2024b	R6698302	Normal	Male	Frontal lobe
H20.33.011_10x 3' v3	SEA-AD_DLPFC	H20.33.011_10x 3' v3	AD	Female	Frontal lobe
s27	GSE254569	s27	Normal	Male	Frontal lobe
10X175_6	37824663	10X175_6	Normal	Male	Cerebellum
10X387_3	37824663	10X387_3	Normal	Male	Pons
R9794121	ROSMAP_CELL2023	R9794121	PART	Male	Frontal lobe
10X176_6	37824663	10X176_6	Normal	Male	Cerebellum
R8781115	ROSMAP_NATURE2024b	R8781115	Resilience	Male	Frontal lobe
H21.33.019_10x 3' v3	SEA-AD_DLPFC	H21.33.019_10x 3' v3	Normal	Male	Frontal lobe
Case82_posterior	34051145	Case82_posterior	Epilepsy	Female	Limbic lobe
10X360_6	37824663	10X360_6	Normal	Male	Pons
R5741580	ROSMAP_CELL2023	R5741580	Normal	Female	Frontal lobe
G16	ADRD_multiome	G16	Normal	Male	Cerebellum
10X248_5	37824663	10X248_5	Normal	Male	Cerebral cortex
10X380_4	37824663	10X380_4	Normal	Male	Limbic lobe
R2645101	ROSMAP_NATURE2024b	R2645101	AD	Female	Frontal lobe
R9116123	ROSMAP_NATURE2024b	R9116123	PART	Female	Frontal lobe
R2975126	ROSMAP_CELL2023	R2975126	Resilience	Female	Frontal lobe
10X385_2	37824663	10X385_2	Normal	Male	Limbic lobe
10X388_7	37824663	10X388_7	Normal	Male	Basal ganglia
10X146_2	37824663	10X146_2	Normal	Male	Cerebral cortex
R6392007	ROSMAP_CELL2023	R6392007	PART	Female	Frontal lobe
R9137173	ROSMAP_NATURE2024b	R9137173	AD	Female	Frontal lobe
3345	35513515	3345	Normal	Female	Basal ganglia
R2787688	ROSMAP_CELL2023	R2787688	Resilience	Female	Frontal lobe
10X182_3	37824663	10X182_3	Normal	Male	Basal ganglia
CO14	30747918	CO14	Normal	Male	Unspecified
10X218_5	37824663	10X218_5	Normal	Male	Cerebellum
10X361_4	37824663	10X361_4	Normal	Male	Thalamus
10X359_7	37824663	10X359_7	Normal	Male	Thalamus
10X249_8	37824663	10X249_8	Normal	Male	Cerebral cortex
R2859649	ROSMAP_NATURE2024b	R2859649	AD	Female	Frontal lobe
R7210604	ROSMAP_NATURE2024b	R7210604	AD	Male	Frontal lobe
210910_MCX_ALS_134_snRNA-C5	Syn51105515	210910_MCX_ALS_134_snRNA-C5	Amyotrophic lateral sclerosis	Female	Frontal lobe
10X377_5	37824663	10X377_5	Normal	Male	Basal ganglia
s46	GSE254569	s46	Schizophrenia	Female	Frontal lobe
R5214048	ROSMAP_NATURE2024b	R5214048	AD	Female	Frontal lobe
10X175_5	37824663	10X175_5	Normal	Male	Cerebellum
10X172_5	37824663	10X172_5	Normal	Male	Cerebral cortex
Sample-66	GSE174367	Sample-66	Normal	Female	Frontal lobe
s82	GSE254569	s82	Schizophrenia	Male	Frontal lobe
R1327471	ROSMAP_NATURE2024b	R1327471	AD	Female	Frontal lobe
R7412731	ROSMAP_CELL2023	R7412731	AD	Female	Frontal lobe
R6265038	ROSMAP_CELL2023	R6265038	AD	Female	Frontal lobe
10X354_3	37824663	10X354_3	Normal	Male	Cerebral cortex
10X277_4	37824663	10X277_4	Normal	Male	Cerebral cortex
G5	ADRD_multiome	G5	Progressive supranuclear palsy	Male	Cerebellum
10X236_1	37824663	10X236_1	Normal	Male	Midbrain
R8054504	ROSMAP_NATURE2024b	R8054504	Resilience	Male	Frontal lobe
Sample-46	GSE174367	Sample-46	AD	Male	Frontal lobe
R7796947	ROSMAP_NATURE2024b	R7796947	Normal	Female	Frontal lobe
10X419_1	37824663	10X419_1	Normal	Male	Basal ganglia
A19-156	ADRD_multiome	A19-156	AD	Male	Cerebellum
R3997006	ROSMAP_NATURE2024b	R3997006	AD	Male	Frontal lobe
10X160_8	37824663	10X160_8	Normal	Female	Cerebral cortex
R9489952	ROSMAP_CELL2023	R9489952	Resilience	Female	Frontal lobe
R3198654	ROSMAP_NATURE2024b	R3198654	AD	Female	Frontal lobe
191114_PN_306_snRNA-E10	Syn51105515	191114_PN_306_snRNA-E10	Normal	Female	Frontal lobe
R6536134	ROSMAP_NATURE2024b	R6536134	AD	Female	Frontal lobe
H20.33.018_10x 3' v3	SEA-AD_DLPFC	H20.33.018_10x 3' v3	AD	Female	Frontal lobe
R6057469	ROSMAP_CELL2023	R6057469	Normal	Male	Frontal lobe
R4567280	ROSMAP_CELL2023	R4567280	Normal	Female	Frontal lobe
H20.33.044_10x multiome	SEA-AD_MTG	H20.33.044_10x multiome	Normal	Male	Temporal lobe
MS176	30747918	MS176	Multiple sclerosis	Male	Unspecified
AD13	GSE157827	AD13	AD	Female	Frontal lobe
R6352950	ROSMAP_NATURE2024b	R6352950	AD	Female	Frontal lobe
R8635714	ROSMAP_NATURE2024b	R8635714	PART	Male	Frontal lobe
R2045909	ROSMAP_NATURE2024b	R2045909	PART	Male	Frontal lobe
10X350_3	37824663	10X350_3	Normal	Male	Cerebellum
Donor1OC	GSE148822	Donor1OC	Normal	Male	Occipital lobe
10X358_5	37824663	10X358_5	Normal	Male	Thalamus
10X356_8	37824663	10X356_8	Normal	Male	Basal ganglia
10X222_3	37824663	10X222_3	Normal	Male	Pons
H21.33.003_10x multiome	SEA-AD_MTG	H21.33.003_10x multiome	Normal	Male	Temporal lobe
R3840906	ROSMAP_CELL2023	R3840906	PART	Male	Frontal lobe
R3185659	ROSMAP_NATURE2024b	R3185659	Normal	Male	Frontal lobe
5c930a4b-12c9-4666-ae2b-dbcb2914d41d	37217978	5c930a4b-12c9-4666-ae2b-dbcb2914d41d	Normal	Male	Spinal cord
H20.33.040_10x multiome	SEA-AD_MTG	H20.33.040_10x multiome	AD	Male	Temporal lobe
10X172_6	37824663	10X172_6	Normal	Male	Cerebral cortex
R6231318	ROSMAP_NATURE2024b	R6231318	AD	Male	Frontal lobe
R9904978	ROSMAP_NATURE2024b	R9904978	Normal	Male	Frontal lobe
10X221_6	37824663	10X221_6	Normal	Male	Cerebral cortex
210526_PN_322_snRNA-E6	Syn51105515	210526_PN_322_snRNA-E6	Normal	Male	Frontal lobe
H20.33.008_10x 3' v3	SEA-AD_MTG	H20.33.008_10x 3' v3	AD	Female	Temporal lobe
R3035452	ROSMAP_NATURE2024b	R3035452	AD	Male	Frontal lobe
R6280004	ROSMAP_NATURE2024b	R6280004	Resilience	Female	Frontal lobe
10X389_3	37824663	10X389_3	Normal	Male	Midbrain
10X192_1	37824663	10X192_1	Normal	Male	Thalamus
10X277_2	37824663	10X277_2	Normal	Male	Cerebral cortex
ALS1	ALS_multiome	ALS1	Amyotrophic lateral sclerosis	Male	Frontal lobe
10X350_7	37824663	10X350_7	Normal	Male	Basal ganglia
R5158294	ROSMAP_NATURE2024b	R5158294	Normal	Female	Frontal lobe
H18.30.001_ACC	37824655	H18.30.001_ACC	Normal	Female	Limbic lobe
3298	35513515	3298	Normal	Male	Basal ganglia
R6759986	ROSMAP_CELL2023	R6759986	AD	Female	Frontal lobe
R6155093	ROSMAP_NATURE2024b	R6155093	PART	Female	Frontal lobe
R4240155	ROSMAP_CELL2023	R4240155	AD	Female	Frontal lobe
R7304869	ROSMAP_NATURE2024b	R7304869	Resilience	Female	Frontal lobe
A163/17 SSC	GSE160936	A163/17 SSC	AD	Male	Parietal lobe
AD10	GSE157827	AD10	AD	Male	Frontal lobe
R4262244	ROSMAP_CELL2023	R4262244	AD	Male	Frontal lobe
R4859661	ROSMAP_NATURE2024b	R4859661	PART	Female	Frontal lobe
R5573393	ROSMAP_NATURE2024b	R5573393	AD	Female	Frontal lobe
R8003745	ROSMAP_NATURE2024b	R8003745	AD	Female	Frontal lobe
10X389_7	37824663	10X389_7	Normal	Male	Basal ganglia
A21-120	ADRD_multiome	A21-120	AD	Female	Cerebellum
R9323873	ROSMAP_CELL2023	R9323873	AD	Female	Frontal lobe
R4817881	ROSMAP_NATURE2024b	R4817881	AD	Male	Frontal lobe
H21.33.009_10x 3' v3	SEA-AD_MTG	H21.33.009_10x 3' v3	AD	Female	Temporal lobe
10X378_1	37824663	10X378_1	Normal	Male	Thalamus
10X391_7	37824663	10X391_7	Normal	Male	Pons
191112_ALS_111_snRNA-B10	Syn51105515	191112_ALS_111_snRNA-B10	Amyotrophic lateral sclerosis	Female	Frontal lobe
10X248_7	37824663	10X248_7	Normal	Male	Cerebral cortex
Donor13OC	GSE148822	Donor13OC	AD	Female	Occipital lobe
R9976232	ROSMAP_NATURE2024b	R9976232	PART	Female	Frontal lobe
10X350_4	37824663	10X350_4	Normal	Male	Cerebellum
H20.33.031_10x 3' v3	SEA-AD_MTG	H20.33.031_10x 3' v3	AD	Female	Temporal lobe
d35e52e5-1d11-4e60-b0fe-afe872ae0d61	37217978	d35e52e5-1d11-4e60-b0fe-afe872ae0d61	Normal	Male	Frontal lobe
AD-AT8-3	GSE129308	AD-AT8-3	AD	Male	Frontal lobe
10X354_7	37824663	10X354_7	Normal	Male	Cerebral cortex
H19.30.001_M1	37824655	H19.30.001_M1	Normal	Male	Frontal lobe
10X249_4	37824663	10X249_4	Normal	Male	Cerebral cortex
R8998310	ROSMAP_NATURE2024b	R8998310	Resilience	Male	Frontal lobe
R2045909	ROSMAP_CELL2023	R2045909	PART	Male	Frontal lobe
10X175_4	37824663	10X175_4	Normal	Male	Cerebral cortex
R8457289	ROSMAP_NATURE2024b	R8457289	AD	Male	Frontal lobe
R5965031	ROSMAP_CELL2023	R5965031	AD	Male	Frontal lobe
210526_ALS_127_snRNA-B1	Syn51105515	210526_ALS_127_snRNA-B1	Amyotrophic lateral sclerosis	Male	Frontal lobe
R4332132	ROSMAP_NATURE2024b	R4332132	AD	Female	Frontal lobe
R2124216	ROSMAP_CELL2023	R2124216	AD	Male	Frontal lobe
10X218_3	37824663	10X218_3	Normal	Male	Medulla
R4744901	ROSMAP_NATURE2024b	R4744901	Resilience	Female	Frontal lobe
10X384_5	37824663	10X384_5	Normal	Male	Cerebral cortex
H21.33.033_10x 3' v3	SEA-AD_MTG	H21.33.033_10x 3' v3	AD	Female	Temporal lobe
R9309271	ROSMAP_CELL2023	R9309271	AD	Female	Frontal lobe
10X386_2	37824663	10X386_2	Normal	Male	Medulla
ALS9	ALS_multiome	ALS9	Amyotrophic lateral sclerosis	Female	Frontal lobe
10X382_2	37824663	10X382_2	Normal	Male	Cerebral cortex
10X329_8	37824663	10X329_8	Normal	Male	Cerebral cortex
210526_PN_319_snRNA-E5	Syn51105515	210526_PN_319_snRNA-E5	Normal	Male	Frontal lobe
R1133959	ROSMAP_NATURE2024b	R1133959	AD	Female	Frontal lobe
R9817161	ROSMAP_NATURE2024b	R9817161	AD	Female	Frontal lobe
HSB106	36007006	HSB106	Normal	Male	Frontal lobe
R4480046	ROSMAP_CELL2023	R4480046	AD	Female	Frontal lobe
R9072353	ROSMAP_CELL2023	R9072353	PART	Female	Frontal lobe
10X229_2	37824663	10X229_2	Normal	Male	Limbic lobe
ALS3	ALS_multiome	ALS3	Amyotrophic lateral sclerosis	Female	Frontal lobe
s55	GSE254569	s55	Normal	Male	Frontal lobe
R8759568	ROSMAP_CELL2023	R8759568	PART	Male	Frontal lobe
10X176_3	37824663	10X176_3	Normal	Male	Pons
Donor16OTC	GSE148822	Donor16OTC	AD	Female	Occipital lobe
10X206_5	37824663	10X206_5	Normal	Male	Limbic lobe
10X230_6	37824663	10X230_6	Normal	Male	Limbic lobe
R9395022	ROSMAP_CELL2023	R9395022	Resilience	Male	Frontal lobe
R2928383	ROSMAP_NATURE2024b	R2928383	Resilience	Female	Frontal lobe
s86	GSE254569	s86	Schizophrenia	Male	Frontal lobe
R7025378	ROSMAP_CELL2023	R7025378	AD	Male	Frontal lobe
10X193_8	37824663	10X193_8	Normal	Male	Thalamus
R7904841	ROSMAP_CELL2023	R7904841	Normal	Female	Frontal lobe
H20.33.014_10x multiome	SEA-AD_MTG	H20.33.014_10x multiome	AD	Female	Temporal lobe
R9489952	ROSMAP_NATURE2024b	R9489952	Resilience	Female	Frontal lobe
R5459434	ROSMAP_CELL2023	R5459434	Normal	Female	Frontal lobe
A20-93	ADRD_multiome	A20-93	AD	Male	Cerebellum
10X383_6	37824663	10X383_6	Normal	Male	Medulla
10X203_5	37824663	10X203_5	Normal	Male	Basal ganglia
210910_PFC_ALS_132_snRNA-C11	Syn51105515	210910_PFC_ALS_132_snRNA-C11	Amyotrophic lateral sclerosis	Male	Frontal lobe
R6939144	ROSMAP_CELL2023	R6939144	AD	Male	Frontal lobe
R7840275	ROSMAP_CELL2023	R7840275	Resilience	Male	Frontal lobe
10X318_3	37824663	10X318_3	Normal	Male	Basal ganglia
s39	GSE254569	s39	Bipolar disorder	Female	Frontal lobe
10X418_8	37824663	10X418_8	Normal	Male	Cerebral cortex
10X204_7	37824663	10X204_7	Normal	Male	Pons
A20-06	ADRD_multiome	A20-06	AD	Male	Cerebellum
R7594705	ROSMAP_NATURE2024b	R7594705	AD	Female	Frontal lobe
R4745715	ROSMAP_NATURE2024b	R4745715	Normal	Female	Frontal lobe
R2372487	ROSMAP_CELL2023	R2372487	AD	Female	Frontal lobe
Case57_anterior	34051145	Case57_anterior	Epilepsy	Female	Limbic lobe
10X237_1	37824663	10X237_1	Normal	Male	Cerebellum
10X360_3	37824663	10X360_3	Normal	Male	Thalamus
10X380_5	37824663	10X380_5	Normal	Male	Hypothalamus
H19.30.002_S1	37824655	H19.30.002_S1	Normal	Male	Parietal lobe
s.0151	GSE243639	s.0151	Normal	Female	Basal ganglia
H19.30.001_ACC	37824655	H19.30.001_ACC	Normal	Male	Limbic lobe
R7596878	ROSMAP_NATURE2024b	R7596878	AD	Female	Frontal lobe
0e0ca028-33db-4d20-b037-885bafedfccd	37217978	0e0ca028-33db-4d20-b037-885bafedfccd	Normal	Female	Frontal lobe
10X381_6	37824663	10X381_6	Normal	Male	Cerebral cortex
191112_ALS_110_snRNA-B9	Syn51105515	191112_ALS_110_snRNA-B9	Amyotrophic lateral sclerosis	Female	Frontal lobe
10X190_2	37824663	10X190_2	Normal	Male	Cerebral cortex
210526_PN_307_snRNA-D12	Syn51105515	210526_PN_307_snRNA-D12	Normal	Female	Frontal lobe
s2	GSE254569	s2	Clinical depression	Male	Frontal lobe
10X357_3	37824663	10X357_3	Normal	Male	Basal ganglia
s30	GSE254569	s30	Schizoaffective disorder	Female	Frontal lobe
R1234575	ROSMAP_NATURE2024b	R1234575	PART	Female	Frontal lobe
2569	35513515	2569	Lewy body dementia	Male	Basal ganglia
H20.33.026_10x multiome	SEA-AD_DLPFC	H20.33.026_10x multiome	AD	Female	Frontal lobe
10X380_2	37824663	10X380_2	Normal	Male	Cerebral cortex
H20.33.040_10x multiome	SEA-AD_DLPFC	H20.33.040_10x multiome	AD	Male	Frontal lobe
10X240_8	37824663	10X240_8	Normal	Male	Cerebral cortex
10X277_6	37824663	10X277_6	Normal	Male	Cerebral cortex
Donor8OC	GSE148822	Donor8OC	Normal	Male	Occipital lobe
H21.33.021_10x 3' v3	SEA-AD_MTG	H21.33.021_10x 3' v3	AD	Male	Temporal lobe
R5973191	ROSMAP_NATURE2024b	R5973191	Normal	Female	Frontal lobe
A127/11 EC	GSE160936	A127/11 EC	Normal	Male	Temporal lobe
Donor17OTC	GSE148822	Donor17OTC	AD	Female	Occipital lobe
210526_ALS_103_snRNA-H7	Syn51105515	210526_ALS_103_snRNA-H7	Amyotrophic lateral sclerosis	Female	Frontal lobe
10X191_4	37824663	10X191_4	Normal	Male	Thalamus
10X216_2	37824663	10X216_2	Normal	Male	Cerebral cortex
s.0119	GSE243639	s.0119	Parkinson's disease	Male	Basal ganglia
Case56_posterior	34051145	Case56_posterior	Epilepsy	Female	Limbic lobe
10X175_3	37824663	10X175_3	Normal	Male	Cerebral cortex
10X240_3	37824663	10X240_3	Normal	Male	Cerebral cortex
201019_ALS_106_snRNA-B5	Syn51105515	201019_ALS_106_snRNA-B5	Amyotrophic lateral sclerosis	Female	Frontal lobe
R1344510	ROSMAP_NATURE2024b	R1344510	PART	Female	Frontal lobe
10X388_4	37824663	10X388_4	Normal	Male	Limbic lobe
10X172_1	37824663	10X172_1	Normal	Male	Cerebral cortex
s15	GSE254569	s15	Schizoaffective disorder	Male	Frontal lobe
R3863249	ROSMAP_CELL2023	R3863249	AD	Female	Frontal lobe
R8410904	ROSMAP_NATURE2024b	R8410904	Resilience	Male	Frontal lobe
10X418_5	37824663	10X418_5	Normal	Male	Cerebral cortex
10X356_2	37824663	10X356_2	Normal	Male	Cerebellum
R3477250	ROSMAP_CELL2023	R3477250	Resilience	Female	Frontal lobe
R4917253	ROSMAP_CELL2023	R4917253	AD	Female	Frontal lobe
R2488731	ROSMAP_CELL2023	R2488731	AD	Male	Frontal lobe
R4996203	ROSMAP_NATURE2024b	R4996203	Resilience	Female	Frontal lobe
210526_PN_306_snRNA-D11	Syn51105515	210526_PN_306_snRNA-D11	Normal	Female	Frontal lobe
H21.33.011_10x 3' v3	SEA-AD_DLPFC	H21.33.011_10x 3' v3	PART	Female	Frontal lobe
10X390_5	37824663	10X390_5	Normal	Male	Pons
R9354381	ROSMAP_CELL2023	R9354381	AD	Female	Frontal lobe
s69	GSE254569	s69	Schizophrenia	Male	Frontal lobe
R5885245	ROSMAP_CELL2023	R5885245	AD	Female	Frontal lobe
R5234179	ROSMAP_CELL2023	R5234179	Normal	Male	Frontal lobe
191112_ALS_120_snRNA-A1	Syn51105515	191112_ALS_120_snRNA-A1	Amyotrophic lateral sclerosis	Male	Frontal lobe
c2777507-4925-4cd0-8460-3c905c0cf5fb	37217978	c2777507-4925-4cd0-8460-3c905c0cf5fb	Normal	Male	Frontal lobe
R3857147	ROSMAP_CELL2023	R3857147	AD	Female	Frontal lobe
Donor17OC	GSE148822	Donor17OC	AD	Female	Occipital lobe
10X145_6	37824663	10X145_6	Normal	Male	Basal ganglia
R8466373	ROSMAP_CELL2023	R8466373	Normal	Female	Frontal lobe
R3328752	ROSMAP_NATURE2024b	R3328752	PART	Female	Frontal lobe
R3078606	ROSMAP_NATURE2024b	R3078606	Resilience	Female	Frontal lobe
R7029629	ROSMAP_CELL2023	R7029629	PART	Male	Frontal lobe
10X236_2	37824663	10X236_2	Normal	Male	Midbrain
R5369295	ROSMAP_NATURE2024b	R5369295	AD	Female	Frontal lobe
10X220_7	37824663	10X220_7	Normal	Male	Basal ganglia
10X361_5	37824663	10X361_5	Normal	Male	Cerebral cortex
s72	GSE254569	s72	Schizophrenia	Male	Frontal lobe
H21.33.010_10x 3' v3	SEA-AD_MTG	H21.33.010_10x 3' v3	AD	Female	Temporal lobe
81721d0a-e68e-431e-8e85-4f06dca6c16f	37217978	81721d0a-e68e-431e-8e85-4f06dca6c16f	Normal	Female	Frontal lobe
G6	ADRD_multiome	G6	Progressive supranuclear palsy	Female	Cerebellum
H20.33.025_10x 3' v3	SEA-AD_DLPFC	H20.33.025_10x 3' v3	AD	Male	Frontal lobe
R8266864	ROSMAP_CELL2023	R8266864	AD	Female	Frontal lobe
H21.33.007_10x 3' v3	SEA-AD_DLPFC	H21.33.007_10x 3' v3	AD	Female	Frontal lobe
R6622577	ROSMAP_CELL2023	R6622577	PART	Female	Frontal lobe
10X216_5	37824663	10X216_5	Normal	Male	Cerebral cortex
R3811781	ROSMAP_NATURE2024b	R3811781	PART	Male	Frontal lobe
R7054373	ROSMAP_CELL2023	R7054373	AD	Female	Frontal lobe
10X222_7	37824663	10X222_7	Normal	Male	Limbic lobe
210526_ALS_130_snRNA-B4	Syn51105515	210526_ALS_130_snRNA-B4	Amyotrophic lateral sclerosis	Male	Frontal lobe
10X375_4	37824663	10X375_4	Normal	Male	Thalamus
R3884524	ROSMAP_NATURE2024b	R3884524	AD	Female	Frontal lobe
s47	GSE254569	s47	Normal	Female	Frontal lobe
10X193_3	37824663	10X193_3	Normal	Male	Hypothalamus
10X270_4	37824663	10X270_4	Normal	Male	Cerebral cortex
H20.33.037_10x 3' v3	SEA-AD_DLPFC	H20.33.037_10x 3' v3	AD	Female	Frontal lobe
10X330_4	37824663	10X330_4	Normal	Male	Basal ganglia
H19.30.001_DLPFC	37824655	H19.30.001_DLPFC	Normal	Male	Frontal lobe
10X354_6	37824663	10X354_6	Normal	Male	Thalamus
10X276_1	37824663	10X276_1	Normal	Male	Cerebral cortex
R8725848	ROSMAP_CELL2023	R8725848	Normal	Female	Frontal lobe
210910_PFC_ALS_133_snRNA-C12	Syn51105515	210910_PFC_ALS_133_snRNA-C12	Amyotrophic lateral sclerosis	Male	Frontal lobe
10X243_5	37824663	10X243_5	Normal	Male	Cerebellum
R7143693	ROSMAP_NATURE2024b	R7143693	PART	Female	Frontal lobe
R3211474	ROSMAP_NATURE2024b	R3211474	AD	Male	Frontal lobe
MS121	30747918	MS121	Multiple sclerosis	Female	Unspecified
H20.33.043_10x multiome	SEA-AD_MTG	H20.33.043_10x multiome	AD	Male	Temporal lobe
R3512949	ROSMAP_NATURE2024b	R3512949	Normal	Male	Frontal lobe
10X227_3	37824663	10X227_3	Normal	Male	Medulla
10X357_8	37824663	10X357_8	Normal	Male	Thalamus
10X378_3	37824663	10X378_3	Normal	Male	Midbrain
10X206_1	37824663	10X206_1	Normal	Male	Limbic lobe
10X376_8	37824663	10X376_8	Normal	Male	Cerebral cortex
3ab379ef-aaa2-4083-815d-8a79041c4b25	37217978	3ab379ef-aaa2-4083-815d-8a79041c4b25	Normal	Female	Spinal cord
R9936070	ROSMAP_NATURE2024b	R9936070	Normal	Male	Frontal lobe
H21.33.041_10x 3' v3	SEA-AD_MTG	H21.33.041_10x 3' v3	PART	Female	Temporal lobe
A053/11 SSC	GSE160936	A053/11 SSC	Normal	Male	Parietal lobe
Sample-22	GSE174367	Sample-22	AD	Male	Frontal lobe
R9239503	ROSMAP_NATURE2024b	R9239503	AD	Female	Frontal lobe
10X381_2	37824663	10X381_2	Normal	Male	Pons
R3077672	ROSMAP_NATURE2024b	R3077672	AD	Female	Frontal lobe
10X360_1	37824663	10X360_1	Normal	Male	Medulla
210526_FTLD_202_snRNA-B5	Syn51105515	210526_FTLD_202_snRNA-B5	Frontotemporal lobar degeneration	Female	Frontal lobe
H20.33.043_10x 3' v3	SEA-AD_MTG	H20.33.043_10x 3' v3	AD	Male	Temporal lobe
R9210731	ROSMAP_CELL2023	R9210731	Normal	Male	Frontal lobe
10X348_6	37824663	10X348_6	Normal	Male	Cerebral cortex
R3121235	ROSMAP_CELL2023	R3121235	PART	Female	Frontal lobe
10X353_4	37824663	10X353_4	Normal	Male	Basal ganglia
s52	GSE254569	s52	Normal	Female	Frontal lobe
10X362_6	37824663	10X362_6	Normal	Male	Hypothalamus
R8329066	ROSMAP_CELL2023	R8329066	Resilience	Female	Frontal lobe
R2881301	ROSMAP_NATURE2024b	R2881301	PART	Male	Frontal lobe
R6268135	ROSMAP_CELL2023	R6268135	AD	Male	Frontal lobe
10X375_8	37824663	10X375_8	Normal	Male	Midbrain
PDC026 SSC	GSE160936	PDC026 SSC	Normal	Female	Parietal lobe
10X176_7	37824663	10X176_7	Normal	Male	Cerebral cortex
s51	GSE254569	s51	Schizophrenia	Male	Frontal lobe
R2398607	ROSMAP_NATURE2024b	R2398607	AD	Female	Frontal lobe
10X357_4	37824663	10X357_4	Normal	Male	Basal ganglia
H20.33.016_10x 3' v3	SEA-AD_DLPFC	H20.33.016_10x 3' v3	AD	Female	Frontal lobe
R7944883	ROSMAP_CELL2023	R7944883	AD	Female	Frontal lobe
H21.33.013_10x 3' v3	SEA-AD_DLPFC	H21.33.013_10x 3' v3	AD	Female	Frontal lobe
R9817056	ROSMAP_CELL2023	R9817056	Normal	Male	Frontal lobe
10X205_6	37824663	10X205_6	Normal	Male	Basal ganglia
210526_ALS_128_snRNA-F7	Syn51105515	210526_ALS_128_snRNA-F7	Amyotrophic lateral sclerosis	Male	Frontal lobe
3482	35513515	3482	Normal	Female	Basal ganglia
H20.33.038_10x multiome	SEA-AD_MTG	H20.33.038_10x multiome	AD	Female	Temporal lobe
R3927700	ROSMAP_NATURE2024b	R3927700	Resilience	Female	Frontal lobe
H21.33.017_10x 3' v3	SEA-AD_DLPFC	H21.33.017_10x 3' v3	AD	Female	Frontal lobe
R6476704	ROSMAP_NATURE2024b	R6476704	Normal	Female	Frontal lobe
10X264_3	37824663	10X264_3	Normal	Male	Cerebral cortex
R5676537	ROSMAP_CELL2023	R5676537	AD	Female	Frontal lobe
R3177264	ROSMAP_CELL2023	R3177264	AD	Female	Frontal lobe
s40	GSE254569	s40	Schizophrenia	Male	Frontal lobe
R8741068	ROSMAP_NATURE2024b	R8741068	Normal	Male	Frontal lobe
AD-MAP2-2	GSE129308	AD-MAP2-2	AD	Male	Frontal lobe
10X173_5	37824663	10X173_5	Normal	Male	Midbrain
10X358_6	37824663	10X358_6	Normal	Male	Thalamus
R8760165	ROSMAP_CELL2023	R8760165	PART	Male	Frontal lobe
R3863249	ROSMAP_NATURE2024b	R3863249	AD	Female	Frontal lobe
10X381_3	37824663	10X381_3	Normal	Male	Cerebral cortex
210526_FTLD_222_snRNA-C4	Syn51105515	210526_FTLD_222_snRNA-C4	Frontotemporal lobar degeneration	Male	Frontal lobe
R5210462	ROSMAP_CELL2023	R5210462	PART	Male	Frontal lobe
10X219_2	37824663	10X219_2	Normal	Male	Basal ganglia
R6934314	ROSMAP_NATURE2024b	R6934314	Normal	Male	Frontal lobe
10X265_7	37824663	10X265_7	Normal	Male	Cerebral cortex
10X145_7	37824663	10X145_7	Normal	Male	Basal ganglia
4f84b451-c559-432b-acb3-3ec95291a1ac	37217978	4f84b451-c559-432b-acb3-3ec95291a1ac	Normal	Female	Cerebellum
H20.33.041_10x 3' v3	SEA-AD_MTG	H20.33.041_10x 3' v3	AD	Female	Temporal lobe
10X243_6	37824663	10X243_6	Normal	Male	Cerebellum
s5	GSE254569	s5	Schizophrenia	Male	Frontal lobe
R1521786	ROSMAP_CELL2023	R1521786	AD	Male	Frontal lobe
10X350_5	37824663	10X350_5	Normal	Male	Basal ganglia
10X269_7	37824663	10X269_7	Normal	Male	Cerebral cortex
R8410459	ROSMAP_NATURE2024b	R8410459	PART	Female	Frontal lobe
R4361022	ROSMAP_CELL2023	R4361022	Resilience	Male	Frontal lobe
R4379962	ROSMAP_CELL2023	R4379962	AD	Male	Frontal lobe
10X355_4	37824663	10X355_4	Normal	Male	Basal ganglia
R2703808	ROSMAP_NATURE2024b	R2703808	Resilience	Female	Frontal lobe
2142	35513515	2142	Parkinson's disease	Male	Basal ganglia
s67	GSE254569	s67	Bipolar disorder	Male	Frontal lobe
R8799615	ROSMAP_NATURE2024b	R8799615	PART	Female	Frontal lobe
H20.33.044_10x 3' v3	SEA-AD_DLPFC	H20.33.044_10x 3' v3	Normal	Male	Frontal lobe
10X382_8	37824663	10X382_8	Normal	Male	Medulla
R9540861	ROSMAP_NATURE2024b	R9540861	AD	Female	Frontal lobe
s.0127	GSE243639	s.0127	Normal	Male	Basal ganglia
A402/14 EC	GSE160936	A402/14 EC	AD	Male	Temporal lobe
R9145673	ROSMAP_NATURE2024b	R9145673	PART	Female	Frontal lobe
10X204_8	37824663	10X204_8	Normal	Male	Pons
R3727306	ROSMAP_NATURE2024b	R3727306	AD	Female	Frontal lobe
10X377_7	37824663	10X377_7	Normal	Male	Midbrain
H20.33.026_10x 3' v3	SEA-AD_MTG	H20.33.026_10x 3' v3	AD	Female	Temporal lobe
R2294544	ROSMAP_CELL2023	R2294544	AD	Male	Frontal lobe
R6828280	ROSMAP_NATURE2024b	R6828280	AD	Male	Frontal lobe
H20.33.005_10x 3' v3	SEA-AD_MTG	H20.33.005_10x 3' v3	AD	Female	Temporal lobe
10X243_7	37824663	10X243_7	Normal	Male	Cerebellum
10X355_3	37824663	10X355_3	Normal	Male	Basal ganglia
210526_PN_301_snRNA-D7	Syn51105515	210526_PN_301_snRNA-D7	Normal	Female	Frontal lobe
H20.33.035_10x 3' v3	SEA-AD_DLPFC	H20.33.035_10x 3' v3	PART	Female	Frontal lobe
H20.33.039_10x multiome	SEA-AD_MTG	H20.33.039_10x multiome	AD	Female	Temporal lobe
210910_MCX_ALS_135_snRNA-C6	Syn51105515	210910_MCX_ALS_135_snRNA-C6	Amyotrophic lateral sclerosis	Female	Frontal lobe
Donor2OTC	GSE148822	Donor2OTC	Normal	Male	Occipital lobe
s.0109	GSE243639	s.0109	Parkinson's disease	Male	Basal ganglia
210526_FTLD_229_snRNA-B9	Syn51105515	210526_FTLD_229_snRNA-B9	Frontotemporal lobar degeneration	Male	Frontal lobe
R9891381	ROSMAP_CELL2023	R9891381	AD	Female	Frontal lobe
10X182_1	37824663	10X182_1	Normal	Male	Cerebral cortex
A096/14 EC	GSE160936	A096/14 EC	AD	Male	Temporal lobe
R1292795	ROSMAP_CELL2023	R1292795	PART	Male	Frontal lobe
s11	GSE254569	s11	Schizophrenia	Male	Frontal lobe
10X228_5	37824663	10X228_5	Normal	Male	Cerebral cortex
A277/12 SSC	GSE160936	A277/12 SSC	AD	Male	Parietal lobe
R8466373	ROSMAP_NATURE2024b	R8466373	Normal	Female	Frontal lobe
H21.33.037_10x 3' v3	SEA-AD_DLPFC	H21.33.037_10x 3' v3	PART	Female	Frontal lobe
H20.33.015_10x multiome	SEA-AD_MTG	H20.33.015_10x multiome	AD	Male	Temporal lobe
H21.33.047_10x 3' v3	SEA-AD_MTG	H21.33.047_10x 3' v3	AD	Male	Temporal lobe
A319/11 EC	GSE160936	A319/11 EC	Normal	Male	Temporal lobe
e720376a-5518-4fb2-96d6-2467a634d3fb	37217978	e720376a-5518-4fb2-96d6-2467a634d3fb	Normal	Female	Spinal cord
10X355_5	37824663	10X355_5	Normal	Male	Basal ganglia
210526_PN_311_snRNA-E3	Syn51105515	210526_PN_311_snRNA-E3	Normal	Female	Frontal lobe
R4087581	ROSMAP_CELL2023	R4087581	PART	Female	Frontal lobe
10X379_4	37824663	10X379_4	Normal	Male	Cerebral cortex
H20.33.033_10x 3' v3	SEA-AD_DLPFC	H20.33.033_10x 3' v3	AD	Male	Frontal lobe
H21.33.040_10x 3' v3	SEA-AD_MTG	H21.33.040_10x 3' v3	AD	Male	Temporal lobe
10X418_4	37824663	10X418_4	Normal	Male	Limbic lobe
10X393_2	37824663	10X393_2	Normal	Male	Thalamus
G8	ADRD_multiome	G8	Lewy body dementia	Male	Cerebellum
R1664857	ROSMAP_CELL2023	R1664857	AD	Female	Frontal lobe
Donor9OTC	GSE148822	Donor9OTC	AD	Female	Occipital lobe
R9393519	ROSMAP_CELL2023	R9393519	AD	Female	Frontal lobe
R1969233	ROSMAP_CELL2023	R1969233	Normal	Male	Frontal lobe
210910_PFC_ALS_136_snRNA-D3	Syn51105515	210910_PFC_ALS_136_snRNA-D3	Amyotrophic lateral sclerosis	Female	Frontal lobe
R7770387	ROSMAP_CELL2023	R7770387	AD	Female	Frontal lobe
10X264_7	37824663	10X264_7	Normal	Male	Cerebral cortex
R6743664	ROSMAP_NATURE2024b	R6743664	PART	Male	Frontal lobe
H21.33.030_10x 3' v3	SEA-AD_DLPFC	H21.33.030_10x 3' v3	AD	Male	Frontal lobe
R5557408	ROSMAP_CELL2023	R5557408	AD	Female	Frontal lobe
R9033345	ROSMAP_CELL2023	R9033345	AD	Male	Frontal lobe
H21.33.046_10x 3' v3	SEA-AD_MTG	H21.33.046_10x 3' v3	AD	Male	Temporal lobe
210526_ALS_114_snRNA-A4	Syn51105515	210526_ALS_114_snRNA-A4	Amyotrophic lateral sclerosis	Female	Frontal lobe
10X392_5	37824663	10X392_5	Normal	Male	Thalamus
R7090624	ROSMAP_NATURE2024b	R7090624	Resilience	Female	Frontal lobe
R5079107	ROSMAP_CELL2023	R5079107	Normal	Male	Frontal lobe
Sample-90	GSE174367	Sample-90	Normal	Female	Frontal lobe
10X380_3	37824663	10X380_3	Normal	Male	Limbic lobe
201019_ALS_108_snRNA-B6	Syn51105515	201019_ALS_108_snRNA-B6	Amyotrophic lateral sclerosis	Female	Frontal lobe
s42	GSE254569	s42	Normal	Male	Frontal lobe
R9094222	ROSMAP_CELL2023	R9094222	AD	Female	Frontal lobe
H20.33.016_10x 3' v3	SEA-AD_MTG	H20.33.016_10x 3' v3	AD	Female	Temporal lobe
R4077358	ROSMAP_CELL2023	R4077358	AD	Male	Frontal lobe
10X386_4	37824663	10X386_4	Normal	Male	Pons
CO25	30747918	CO25	Normal	Male	Unspecified
R2577726	ROSMAP_NATURE2024b	R2577726	Resilience	Female	Frontal lobe
10X378_6	37824663	10X378_6	Normal	Male	Midbrain
H18.30.002_V1	37824655	H18.30.002_V1	Normal	Male	Occipital lobe
10X270_8	37824663	10X270_8	Normal	Male	Cerebral cortex
R4739508	ROSMAP_CELL2023	R4739508	PART	Female	Frontal lobe
10X389_5	37824663	10X389_5	Normal	Male	Thalamus
10X194_7	37824663	10X194_7	Normal	Male	Midbrain
R7157957	ROSMAP_CELL2023	R7157957	PART	Female	Frontal lobe
10X190_3	37824663	10X190_3	Normal	Male	Thalamus
R1658200	ROSMAP_CELL2023	R1658200	AD	Female	Frontal lobe
H19.30.002_ACC	37824655	H19.30.002_ACC	Normal	Male	Limbic lobe
10X330_2	37824663	10X330_2	Normal	Male	Basal ganglia
H21.33.023_10x 3' v3	SEA-AD_MTG	H21.33.023_10x 3' v3	PART	Male	Temporal lobe
R3209518	ROSMAP_CELL2023	R3209518	AD	Male	Frontal lobe
s48	GSE254569	s48	Normal	Male	Frontal lobe
R1956123	ROSMAP_CELL2023	R1956123	PART	Female	Frontal lobe
R7540069	ROSMAP_CELL2023	R7540069	AD	Female	Frontal lobe
R6319811	ROSMAP_NATURE2024b	R6319811	Normal	Female	Frontal lobe
s4	GSE254569	s4	Schizophrenia	Male	Frontal lobe
10X418_3	37824663	10X418_3	Normal	Male	Limbic lobe
10X349_4	37824663	10X349_4	Normal	Male	Cerebral cortex
H21.33.001_10x 3' v3	SEA-AD_DLPFC	H21.33.001_10x 3' v3	PART	Male	Frontal lobe
R9253870	ROSMAP_NATURE2024b	R9253870	AD	Male	Frontal lobe
10X240_7	37824663	10X240_7	Normal	Male	Cerebral cortex
R9582641	ROSMAP_NATURE2024b	R9582641	AD	Male	Frontal lobe
R9764427	ROSMAP_NATURE2024b	R9764427	AD	Male	Frontal lobe
R2424757	ROSMAP_NATURE2024b	R2424757	AD	Female	Frontal lobe
H21.33.031_10x 3' v3	SEA-AD_MTG	H21.33.031_10x 3' v3	AD	Male	Temporal lobe
H19.30.001_A1	37824655	H19.30.001_A1	Normal	Male	Temporal lobe
R5850046	ROSMAP_CELL2023	R5850046	PART	Male	Frontal lobe
R6679530	ROSMAP_NATURE2024b	R6679530	PART	Female	Frontal lobe
R9245150	ROSMAP_NATURE2024b	R9245150	Resilience	Female	Frontal lobe
CO28	30747918	CO28	Normal	Female	Unspecified
10X380_6	37824663	10X380_6	Normal	Male	Hypothalamus
H21.33.026_10x 3' v3	SEA-AD_MTG	H21.33.026_10x 3' v3	AD	Female	Temporal lobe
10X175_7	37824663	10X175_7	Normal	Male	Midbrain
R4415805	ROSMAP_CELL2023	R4415805	PART	Female	Frontal lobe
10X243_8	37824663	10X243_8	Normal	Male	Cerebellum
10X203_8	37824663	10X203_8	Normal	Male	Hypothalamus
210526_ALS_120_snRNA-A9	Syn51105515	210526_ALS_120_snRNA-A9	Amyotrophic lateral sclerosis	Male	Frontal lobe
R2549195	ROSMAP_CELL2023	R2549195	AD	Female	Frontal lobe
8ed46f32-b943-460c-b452-e68388b40929	37217978	8ed46f32-b943-460c-b452-e68388b40929	Normal	Male	Frontal lobe
R4266155	ROSMAP_CELL2023	R4266155	Normal	Female	Frontal lobe
R5447358	ROSMAP_NATURE2024b	R5447358	PART	Female	Frontal lobe
Sample-17	GSE174367	Sample-17	AD	Female	Frontal lobe
191112_ALS_127_snRNA-A4	Syn51105515	191112_ALS_127_snRNA-A4	Amyotrophic lateral sclerosis	Male	Frontal lobe
10X190_4	37824663	10X190_4	Normal	Male	Thalamus
R5177066	ROSMAP_NATURE2024b	R5177066	Resilience	Male	Frontal lobe
10X221_4	37824663	10X221_4	Normal	Male	Limbic lobe
H20.33.045_10x 3' v3	SEA-AD_DLPFC	H20.33.045_10x 3' v3	AD	Female	Frontal lobe
R2347173	ROSMAP_NATURE2024b	R2347173	Resilience	Female	Frontal lobe
H21.33.015_10x 3' v3	SEA-AD_MTG	H21.33.015_10x 3' v3	Normal	Male	Temporal lobe
Donor12OTC	GSE148822	Donor12OTC	AD	Female	Occipital lobe
10X225_1	37824663	10X225_1	Normal	Male	Midbrain
H21.33.025_10x 3' v3	SEA-AD_DLPFC	H21.33.025_10x 3' v3	AD	Female	Frontal lobe
R8783288	ROSMAP_CELL2023	R8783288	AD	Female	Frontal lobe
R9581837	ROSMAP_CELL2023	R9581837	Normal	Female	Frontal lobe
H21.33.019_10x 3' v3	SEA-AD_MTG	H21.33.019_10x 3' v3	Normal	Male	Temporal lobe
10X229_7	37824663	10X229_7	Normal	Male	Limbic lobe
10X377_6	37824663	10X377_6	Normal	Male	Basal ganglia
H20.33.011_10x 3' v3	SEA-AD_MTG	H20.33.011_10x 3' v3	AD	Female	Temporal lobe
10X392_2	37824663	10X392_2	Normal	Male	Limbic lobe
fda4a483-0d5f-4a1d-ba05-e43cddcab71f	37217978	fda4a483-0d5f-4a1d-ba05-e43cddcab71f	Normal	Male	Spinal cord
10X222_5	37824663	10X222_5	Normal	Male	Spinal cord
R4906216	ROSMAP_NATURE2024b	R4906216	AD	Female	Frontal lobe
R5924065	ROSMAP_NATURE2024b	R5924065	PART	Male	Frontal lobe
10X193_2	37824663	10X193_2	Normal	Male	Midbrain
10X384_2	37824663	10X384_2	Normal	Male	Cerebral cortex
R1547566	ROSMAP_NATURE2024b	R1547566	AD	Female	Frontal lobe
10X385_3	37824663	10X385_3	Normal	Male	Basal ganglia
R7160627	ROSMAP_CELL2023	R7160627	AD	Female	Frontal lobe
G12	ADRD_multiome	G12	Normal	Female	Cerebellum
R3740754	ROSMAP_NATURE2024b	R3740754	AD	Male	Frontal lobe
10X173_1	37824663	10X173_1	Normal	Male	Cerebral cortex
5a482ccd-3cce-48f8-af1d-cdb5d741e669	37217978	5a482ccd-3cce-48f8-af1d-cdb5d741e669	Normal	Male	Spinal cord
210910_PFC_ALS_135_snRNA-D2	Syn51105515	210910_PFC_ALS_135_snRNA-D2	Amyotrophic lateral sclerosis	Female	Frontal lobe
10X217_7	37824663	10X217_7	Normal	Male	Pons
R7054373	ROSMAP_NATURE2024b	R7054373	AD	Female	Frontal lobe
R3910349	ROSMAP_CELL2023	R3910349	PART	Female	Frontal lobe
191113_FTLD_216_snRNA-H3	Syn51105515	191113_FTLD_216_snRNA-H3	Frontotemporal lobar degeneration	Male	Frontal lobe
R4292728	ROSMAP_CELL2023	R4292728	PART	Male	Frontal lobe
H21.33.025_10x 3' v3	SEA-AD_MTG	H21.33.025_10x 3' v3	AD	Female	Temporal lobe
R9596785	ROSMAP_NATURE2024b	R9596785	AD	Male	Frontal lobe
R6802400	ROSMAP_NATURE2024b	R6802400	AD	Female	Frontal lobe
H20.33.005_10x multiome	SEA-AD_MTG	H20.33.005_10x multiome	AD	Female	Temporal lobe
R6411801	ROSMAP_CELL2023	R6411801	AD	Male	Frontal lobe
R3008520	ROSMAP_CELL2023	R3008520	AD	Male	Frontal lobe
R5126867	ROSMAP_NATURE2024b	R5126867	Resilience	Female	Frontal lobe
10X386_5	37824663	10X386_5	Normal	Male	Pons
201025_FTLD_238_snRNA-C10	Syn51105515	201025_FTLD_238_snRNA-C10	Frontotemporal lobar degeneration	Female	Frontal lobe
210526_ALS_115_snRNA-A5	Syn51105515	210526_ALS_115_snRNA-A5	Amyotrophic lateral sclerosis	Female	Frontal lobe
10X360_4	37824663	10X360_4	Normal	Male	Thalamus
R1969233	ROSMAP_NATURE2024b	R1969233	Normal	Male	Frontal lobe
10X241_5	37824663	10X241_5	Normal	Male	Cerebral cortex
R7516349	ROSMAP_CELL2023	R7516349	AD	Female	Frontal lobe
R8759568	ROSMAP_NATURE2024b	R8759568	PART	Male	Frontal lobe
R3739042	ROSMAP_NATURE2024b	R3739042	AD	Female	Frontal lobe
Case76_anterior	34051145	Case76_anterior	Epilepsy	Male	Limbic lobe
s59	GSE254569	s59	Schizophrenia	Female	Frontal lobe
10X387_7	37824663	10X387_7	Normal	Male	Medulla
H21.33.001_10x multiome	SEA-AD_MTG	H21.33.001_10x multiome	PART	Male	Temporal lobe
R5546461	ROSMAP_NATURE2024b	R5546461	AD	Female	Frontal lobe
R7911202	ROSMAP_CELL2023	R7911202	PART	Male	Frontal lobe
R3727306	ROSMAP_CELL2023	R3727306	AD	Female	Frontal lobe
R4240155	ROSMAP_NATURE2024b	R4240155	AD	Female	Frontal lobe
10X379_1	37824663	10X379_1	Normal	Male	Medulla
H18.30.001_V1	37824655	H18.30.001_V1	Normal	Female	Occipital lobe
10X277_1	37824663	10X277_1	Normal	Male	Cerebral cortex
R4527133	ROSMAP_CELL2023	R4527133	PART	Male	Frontal lobe
R1822146	ROSMAP_NATURE2024b	R1822146	AD	Female	Frontal lobe
R7651923	ROSMAP_CELL2023	R7651923	Resilience	Female	Frontal lobe
H20.33.015_10x 3' v3	SEA-AD_DLPFC	H20.33.015_10x 3' v3	AD	Male	Frontal lobe
R2516394	ROSMAP_CELL2023	R2516394	AD	Female	Frontal lobe
H21.33.006_10x 3' v3	SEA-AD_MTG	H21.33.006_10x 3' v3	AD	Male	Temporal lobe
10X385_5	37824663	10X385_5	Normal	Male	Thalamus
R6114572	ROSMAP_NATURE2024b	R6114572	Resilience	Male	Frontal lobe
H19.30.001_S1	37824655	H19.30.001_S1	Normal	Male	Parietal lobe
10X241_4	37824663	10X241_4	Normal	Male	Cerebral cortex
10X380_7	37824663	10X380_7	Normal	Male	Hypothalamus
10X172_2	37824663	10X172_2	Normal	Male	Cerebral cortex
R2895885	ROSMAP_NATURE2024b	R2895885	AD	Male	Frontal lobe
H20.33.046_10x 3' v3	SEA-AD_DLPFC	H20.33.046_10x 3' v3	AD	Male	Frontal lobe
R6515859	ROSMAP_CELL2023	R6515859	AD	Female	Frontal lobe
10X173_4	37824663	10X173_4	Normal	Male	Midbrain
R2212277	ROSMAP_NATURE2024b	R2212277	Normal	Female	Frontal lobe
R3840906	ROSMAP_NATURE2024b	R3840906	PART	Male	Frontal lobe
10X419_4	37824663	10X419_4	Normal	Male	Basal ganglia
10X161_1	37824663	10X161_1	Normal	Male	Cerebral cortex
R2901804	ROSMAP_CELL2023	R2901804	AD	Male	Frontal lobe
10X359_1	37824663	10X359_1	Normal	Male	Thalamus
210910_PFC_ALS_139_snRNA-D8	Syn51105515	210910_PFC_ALS_139_snRNA-D8	Amyotrophic lateral sclerosis	Female	Frontal lobe
R9170872	ROSMAP_CELL2023	R9170872	AD	Male	Frontal lobe
s38	GSE254569	s38	Schizophrenia	Male	Frontal lobe
R1830086	ROSMAP_NATURE2024b	R1830086	AD	Male	Frontal lobe
R2124216	ROSMAP_NATURE2024b	R2124216	AD	Male	Frontal lobe
R3280186	ROSMAP_CELL2023	R3280186	Normal	Male	Frontal lobe
R8998310	ROSMAP_CELL2023	R8998310	Resilience	Male	Frontal lobe
R7915228	ROSMAP_NATURE2024b	R7915228	PART	Male	Frontal lobe
R2667630	ROSMAP_CELL2023	R2667630	AD	Male	Frontal lobe
R2582129	ROSMAP_NATURE2024b	R2582129	AD	Female	Frontal lobe
10X171_1	37824663	10X171_1	Normal	Male	Cerebral cortex
H20.33.015_10x multiome	SEA-AD_DLPFC	H20.33.015_10x multiome	AD	Male	Frontal lobe
R3111222	ROSMAP_NATURE2024b	R3111222	AD	Female	Frontal lobe
H21.33.046_10x 3' v3	SEA-AD_DLPFC	H21.33.046_10x 3' v3	AD	Male	Frontal lobe
10X378_8	37824663	10X378_8	Normal	Male	Pons
R1207203	ROSMAP_NATURE2024b	R1207203	AD	Female	Frontal lobe
H20.33.017_10x 3' v3	SEA-AD_DLPFC	H20.33.017_10x 3' v3	AD	Male	Frontal lobe
R4439627	ROSMAP_CELL2023	R4439627	Normal	Male	Frontal lobe
R2716798	ROSMAP_CELL2023	R2716798	AD	Female	Frontal lobe
10X319_6	37824663	10X319_6	Normal	Male	Basal ganglia
R6681836	ROSMAP_CELL2023	R6681836	PART	Male	Frontal lobe
10X418_1	37824663	10X418_1	Normal	Male	Pons
R3607578	ROSMAP_NATURE2024b	R3607578	PART	Female	Frontal lobe
10X240_5	37824663	10X240_5	Normal	Male	Cerebral cortex
H20.33.015_10x 3' v3	SEA-AD_MTG	H20.33.015_10x 3' v3	AD	Male	Temporal lobe
Donor10OTC	GSE148822	Donor10OTC	AD	Female	Occipital lobe
R8882846	ROSMAP_CELL2023	R8882846	AD	Female	Frontal lobe
s85	GSE254569	s85	Schizophrenia	Female	Frontal lobe
210910_MCX_ALS_132_snRNA-C3	Syn51105515	210910_MCX_ALS_132_snRNA-C3	Amyotrophic lateral sclerosis	Male	Frontal lobe
A282/14 SSC	GSE160936	A282/14 SSC	AD	Female	Parietal lobe
R9551808	ROSMAP_CELL2023	R9551808	PART	Male	Frontal lobe
10X205_3	37824663	10X205_3	Normal	Male	Pons
10X216_4	37824663	10X216_4	Normal	Male	Cerebral cortex
10X362_5	37824663	10X362_5	Normal	Male	Hypothalamus
H20.33.014_10x 3' v3	SEA-AD_DLPFC	H20.33.014_10x 3' v3	AD	Female	Frontal lobe
210526_FTLD_225_snRNA-C6	Syn51105515	210526_FTLD_225_snRNA-C6	Frontotemporal lobar degeneration	Male	Frontal lobe
210526_ALS_116_snRNA-A6	Syn51105515	210526_ALS_116_snRNA-A6	Amyotrophic lateral sclerosis	Male	Frontal lobe
H21.33.022_10x 3' v3	SEA-AD_MTG	H21.33.022_10x 3' v3	AD	Female	Temporal lobe
H21.33.039_10x 3' v3	SEA-AD_MTG	H21.33.039_10x 3' v3	AD	Female	Temporal lobe
10X390_6	37824663	10X390_6	Normal	Male	Pons
R3877498	ROSMAP_CELL2023	R3877498	AD	Male	Frontal lobe
10X191_7	37824663	10X191_7	Normal	Male	Basal ganglia
H21.33.036_10x 3' v3	SEA-AD_MTG	H21.33.036_10x 3' v3	AD	Female	Temporal lobe
R5158294	ROSMAP_CELL2023	R5158294	Normal	Female	Frontal lobe
R3128463	ROSMAP_CELL2023	R3128463	AD	Male	Frontal lobe
10X191_5	37824663	10X191_5	Normal	Male	Limbic lobe
R6176158	ROSMAP_NATURE2024b	R6176158	PART	Female	Frontal lobe
10X391_2	37824663	10X391_2	Normal	Male	Medulla
10X377_4	37824663	10X377_4	Normal	Male	Thalamus
s84	GSE254569	s84	Schizophrenia	Male	Frontal lobe
Donor10OC	GSE148822	Donor10OC	AD	Female	Occipital lobe
R5437670	ROSMAP_CELL2023	R5437670	PART	Male	Frontal lobe
10X215_3	37824663	10X215_3	Normal	Male	Cerebral cortex
R2167020	ROSMAP_CELL2023	R2167020	AD	Male	Frontal lobe
R5636935	ROSMAP_CELL2023	R5636935	PART	Female	Frontal lobe
H20.33.013_10x multiome	SEA-AD_MTG	H20.33.013_10x multiome	AD	Male	Temporal lobe
s73	GSE254569	s73	Normal	Female	Frontal lobe
210526_ALS_112_snRNA-A2	Syn51105515	210526_ALS_112_snRNA-A2	Amyotrophic lateral sclerosis	Female	Frontal lobe
10X222_6	37824663	10X222_6	Normal	Male	Spinal cord
10X379_6	37824663	10X379_6	Normal	Male	Cerebral cortex
10X174_5	37824663	10X174_5	Normal	Male	Cerebral cortex
10X355_6	37824663	10X355_6	Normal	Male	Basal ganglia
R8572172	ROSMAP_NATURE2024b	R8572172	Normal	Female	Frontal lobe
191114_PN_304_snRNA-E9	Syn51105515	191114_PN_304_snRNA-E9	Normal	Female	Frontal lobe
10X392_6	37824663	10X392_6	Normal	Male	Thalamus
R9113571	ROSMAP_CELL2023	R9113571	PART	Female	Frontal lobe
A282/14 EC	GSE160936	A282/14 EC	AD	Female	Temporal lobe
R6557859	ROSMAP_NATURE2024b	R6557859	AD	Female	Frontal lobe
210526_PN_317_snRNA-E4	Syn51105515	210526_PN_317_snRNA-E4	Normal	Male	Frontal lobe
10X390_1	37824663	10X390_1	Normal	Male	Pons
H20.33.030_10x 3' v3	SEA-AD_MTG	H20.33.030_10x 3' v3	AD	Female	Temporal lobe
R7066784	ROSMAP_CELL2023	R7066784	AD	Female	Frontal lobe
10X378_7	37824663	10X378_7	Normal	Male	Pons
H21.33.018_10x 3' v3	SEA-AD_DLPFC	H21.33.018_10x 3' v3	Normal	Female	Frontal lobe
R3391715	ROSMAP_CELL2023	R3391715	AD	Female	Frontal lobe
10X382_1	37824663	10X382_1	Normal	Male	Cerebral cortex
R6636386	ROSMAP_CELL2023	R6636386	AD	Male	Frontal lobe
H21.33.044_10x 3' v3	SEA-AD_MTG	H21.33.044_10x 3' v3	AD	Female	Temporal lobe
10X383_4	37824663	10X383_4	Normal	Male	Pons
R9679238	ROSMAP_CELL2023	R9679238	AD	Male	Frontal lobe
s60	GSE254569	s60	Schizophrenia	Male	Frontal lobe
R8615683	ROSMAP_NATURE2024b	R8615683	AD	Female	Frontal lobe
R4937504	ROSMAP_CELL2023	R4937504	Resilience	Female	Frontal lobe
AX21-136	ADRD_multiome	AX21-136	AD	Female	Cerebellum
10X240_2	37824663	10X240_2	Normal	Male	Cerebral cortex
R9880904	ROSMAP_CELL2023	R9880904	Normal	Female	Frontal lobe
191112_ALS_115_snRNA-C1	Syn51105515	191112_ALS_115_snRNA-C1	Amyotrophic lateral sclerosis	Female	Frontal lobe
R1074668	ROSMAP_NATURE2024b	R1074668	AD	Female	Frontal lobe
H21.33.038_10x 3' v3	SEA-AD_MTG	H21.33.038_10x 3' v3	PART	Female	Temporal lobe
R7959406	ROSMAP_NATURE2024b	R7959406	AD	Female	Frontal lobe
R5162558	ROSMAP_CELL2023	R5162558	PART	Male	Frontal lobe
R8351613	ROSMAP_CELL2023	R8351613	PART	Male	Frontal lobe
H20.33.020_10x 3' v3	SEA-AD_DLPFC	H20.33.020_10x 3' v3	AD	Male	Frontal lobe
R5211056	ROSMAP_CELL2023	R5211056	AD	Female	Frontal lobe
10X269_2	37824663	10X269_2	Normal	Male	Cerebral cortex
10X174_6	37824663	10X174_6	Normal	Male	Cerebral cortex
H20.33.025_10x 3' v3	SEA-AD_MTG	H20.33.025_10x 3' v3	AD	Male	Temporal lobe
10X217_2	37824663	10X217_2	Normal	Male	Cerebral cortex
R9649089	ROSMAP_NATURE2024b	R9649089	Normal	Female	Frontal lobe
s87	GSE254569	s87	Schizophrenia	Female	Frontal lobe
R1777884	ROSMAP_NATURE2024b	R1777884	AD	Female	Frontal lobe
R6346298	ROSMAP_CELL2023	R6346298	PART	Female	Frontal lobe
R8678748	ROSMAP_NATURE2024b	R8678748	PART	Female	Frontal lobe
10X390_8	37824663	10X390_8	Normal	Male	Pons
R9677385	ROSMAP_CELL2023	R9677385	PART	Male	Frontal lobe
R8492506	ROSMAP_NATURE2024b	R8492506	AD	Male	Frontal lobe
R8834184	ROSMAP_CELL2023	R8834184	Normal	Male	Frontal lobe
A21-52	ADRD_multiome	A21-52	AD	Female	Cerebellum
10X243_3	37824663	10X243_3	Normal	Male	Cerebellum
R5369295	ROSMAP_CELL2023	R5369295	AD	Female	Frontal lobe
10X204_1	37824663	10X204_1	Normal	Male	Basal ganglia
R3322663	ROSMAP_CELL2023	R3322663	AD	Male	Frontal lobe
R4728676	ROSMAP_CELL2023	R4728676	PART	Male	Frontal lobe
R9393519	ROSMAP_NATURE2024b	R9393519	AD	Female	Frontal lobe
R3176125	ROSMAP_NATURE2024b	R3176125	PART	Female	Frontal lobe
2561	35513515	2561	Lewy body dementia	Female	Basal ganglia
H200.1023_V1	37824655	H200.1023_V1	Normal	Female	Occipital lobe
R4976287	ROSMAP_CELL2023	R4976287	AD	Male	Frontal lobe
10X318_8	37824663	10X318_8	Normal	Male	Basal ganglia
s13	GSE254569	s13	Schizoaffective disorder	Male	Frontal lobe
R9721493	ROSMAP_CELL2023	R9721493	PART	Male	Frontal lobe
10X230_2	37824663	10X230_2	Normal	Male	Midbrain
R3922205	ROSMAP_NATURE2024b	R3922205	Normal	Female	Frontal lobe
10X215_2	37824663	10X215_2	Normal	Male	Cerebral cortex
s49	GSE254569	s49	Normal	Female	Frontal lobe
H21.33.006_10x 3' v3	SEA-AD_DLPFC	H21.33.006_10x 3' v3	AD	Male	Frontal lobe
201019_ALS_103_snRNA-B3	Syn51105515	201019_ALS_103_snRNA-B3	Amyotrophic lateral sclerosis	Female	Frontal lobe
201025_FTLD_240_snRNA-C12	Syn51105515	201025_FTLD_240_snRNA-C12	Frontotemporal lobar degeneration	Male	Frontal lobe
10X229_8	37824663	10X229_8	Normal	Male	Limbic lobe
R3111222	ROSMAP_CELL2023	R3111222	AD	Female	Frontal lobe
10X191_2	37824663	10X191_2	Normal	Male	Basal ganglia
H20.33.018_10x multiome	SEA-AD_MTG	H20.33.018_10x multiome	AD	Female	Temporal lobe
R4077358	ROSMAP_NATURE2024b	R4077358	AD	Male	Frontal lobe
H200.1023_A1	37824655	H200.1023_A1	Normal	Female	Temporal lobe
R3209518	ROSMAP_NATURE2024b	R3209518	AD	Male	Frontal lobe
ALS4	ALS_multiome	ALS4	Amyotrophic lateral sclerosis	Female	Frontal lobe
10X382_4	37824663	10X382_4	Normal	Male	Cerebral cortex
A18-73	ADRD_multiome	A18-73	AD	Female	Cerebellum
H21.33.036_10x 3' v3	SEA-AD_DLPFC	H21.33.036_10x 3' v3	AD	Female	Frontal lobe
Donor9OC	GSE148822	Donor9OC	AD	Female	Occipital lobe
R6086139	ROSMAP_CELL2023	R6086139	PART	Male	Frontal lobe
191113_FTLD_225_snRNA-H5	Syn51105515	191113_FTLD_225_snRNA-H5	Frontotemporal lobar degeneration	Male	Frontal lobe
R2264515	ROSMAP_NATURE2024b	R2264515	AD	Female	Frontal lobe
R1154454	ROSMAP_CELL2023	R1154454	AD	Male	Frontal lobe
s.0153	GSE243639	s.0153	Normal	Male	Basal ganglia
10X175_8	37824663	10X175_8	Normal	Male	Midbrain
s9	GSE254569	s9	Normal	Female	Frontal lobe
10X375_3	37824663	10X375_3	Normal	Male	Thalamus
10X390_7	37824663	10X390_7	Normal	Male	Pons
H20.33.027_10x multiome	SEA-AD_DLPFC	H20.33.027_10x multiome	AD	Female	Frontal lobe
HSB340	36007006	HSB340	Normal	Male	Frontal lobe
H21.33.017_10x 3' v3	SEA-AD_MTG	H21.33.017_10x 3' v3	AD	Female	Temporal lobe
R9738414	ROSMAP_CELL2023	R9738414	PART	Female	Frontal lobe
R7641350	ROSMAP_NATURE2024b	R7641350	Normal	Male	Frontal lobe
R3452739	ROSMAP_NATURE2024b	R3452739	Resilience	Male	Frontal lobe
s68	GSE254569	s68	Schizophrenia	Male	Frontal lobe
R8626395	ROSMAP_NATURE2024b	R8626395	AD	Female	Frontal lobe
10X354_5	37824663	10X354_5	Normal	Male	Thalamus
Sample-45	GSE174367	Sample-45	AD	Female	Frontal lobe
A20-180	ADRD_multiome	A20-180	AD	Female	Cerebellum
R5574987	ROSMAP_CELL2023	R5574987	AD	Female	Frontal lobe
191113_FTLD_211_snRNA-D7	Syn51105515	191113_FTLD_211_snRNA-D7	Frontotemporal lobar degeneration	Female	Frontal lobe
1a50e187-71a0-4226-b480-9fb53c9bc23e	37217978	1a50e187-71a0-4226-b480-9fb53c9bc23e	Normal	Male	Frontal lobe
210526_ALS_118_snRNA-A8	Syn51105515	210526_ALS_118_snRNA-A8	Amyotrophic lateral sclerosis	Male	Frontal lobe
s33	GSE254569	s33	Normal	Female	Frontal lobe
R6879714	ROSMAP_CELL2023	R6879714	PART	Male	Frontal lobe
10X375_2	37824663	10X375_2	Normal	Male	Basal ganglia
R6636386	ROSMAP_NATURE2024b	R6636386	AD	Male	Frontal lobe
A169/10 SSC	GSE160936	A169/10 SSC	AD	Female	Parietal lobe
s.0103	GSE243639	s.0103	Parkinson's disease	Male	Basal ganglia
10X146_6	37824663	10X146_6	Normal	Male	Cerebral cortex
R3623803	ROSMAP_NATURE2024b	R3623803	Normal	Female	Frontal lobe
s.0102	GSE243639	s.0102	Parkinson's disease	Female	Basal ganglia
R4927046	ROSMAP_NATURE2024b	R4927046	AD	Female	Frontal lobe
R2144127	ROSMAP_NATURE2024b	R2144127	AD	Female	Frontal lobe
[truncated: 240 more rows]

## Sheet: Marker genes
Cell Type	Marker Genes
Astrocyte	GFAP
	AQP4
	SLC1A3
	S100B
	SLC1A2
Endothelial	PECAM1
	VWF
	CD34
	CDH5
	CLDN5
Fibroblast	COL1A1
	DCN
	COL1A2
	ACTA2
	THY1
Excitatory Neuron	SLC17A7
	NRGN
	BCL11B
	NEUROD1
	NEUROD2
Inhibitory Neuron	GAD1
	CALB2
	CCK
	GAD2
	SST
Microglia	P2RY12
	TMEM119
	CX3CR1
	AIF1
	CSF1R
Macrophage	CD68
	CD163
	CD14
	MRC1
	CSF1R
Oligodendrocyte	MBP
	MOG
	PLP1
	OLIG2
	MAG
OPC	OLIG2
	PDGFRA
	CSPG4
	SOX10
	VCAN
T cell & Leukocyte	PTPRC
	PDCD1
	CTLA4
	CD69
	CCR7
